# Supplementary material for: Endophilin A1 facilitates organization of the GABAergic postsynaptic machinery to maintain excitation-inhibition balance
Source: eLife. 2025 Oct 2;13:RP102792. doi: 10.7554/eLife.102792 (PMC12490859; doi:10.7554/eLife.102792)
Supplement: Figure 1—figure supplement 1—source data 1. [file elife-102792-fig1-figsupp1-data1.xlsx]

## Sheet: Fig 1-s1A & B
Fast slow frequency					Fast slow amplitude
1.75826	1.4741	0.264166	0.219969		Control	Cre	Control	Cre
3.16927	2.53502	0.336105	0.312329		7.49187	7.76244	7.26109	6.90119
2.39095	1.40101	0.274152	0.237103		9.39429	10.282	10.874	10.199
1.63444	1.74034	0.20863	0.266416		10.6311	9.74093	12.8707	9.66554
1.49027	1.57582	0.266865	0.232274		6.71187	6.7276	6.85346	6.89695
1.4536	1.17879	0.253175	0.185782		10.3997	7.65817	10.5487	7.08114
1.721	1.4945	0.179346	0.198025		9.60523	6.85287	9.54428	6.8739
	1.80407		0.205436		4.79217	4.83217	4.77037	4.77006
	1.5108		0.151995			9.4779		8.12382
						5.0236		4.6346
