# Supplementary material for: Endophilin A1 facilitates organization of the GABAergic postsynaptic machinery to maintain excitation-inhibition balance
Source: eLife. 2025 Oct 2;13:RP102792. doi: 10.7554/eLife.102792 (PMC12490859; doi:10.7554/eLife.102792)
Supplement: Figure 1—source data 1. [file elife-102792-fig1-data1.xlsx]

## Sheet: Figure 1C
	1st										2nd
WT-PTZ injection	M1	M2	M3	M4	M5	M6	M7	M8	M9		M1	M2	M3	M4	M5
Day1	1	1	1	1	1	1	1	1	1		1	1	1	1	1
Day2	1	1	2.5	4	1	1	1	1	1		1	1	1	1	1
Day3	1	1	1.5	2	2	1	1	1	1		1	1	1	1	1
Day4	4	2.5	2	1.5	1	1	1.5	1	1		1	2	2	2	1
Day5	4	1.5	1.5	2.5	4	4	3.5	1	1		2.5	1.5	4	2	1
Day6	4	2.5	2.5	3	1	4	2	1	1		1.5	1	2.5	1.5	1
Day7	4	4	3	4	1.5	4	2	1	1		2.5	1.5	1.5	4	1
Day8	4	4	3	4	1.5	4	4	4	1		2	2.5	1.5	3	1
KO-PTZ injection	M1	M2	M3	M4	M5	M6	M7	M8	M9		M1	M2	M3	M4	M5
Day1	4	1	1	1	1	4	1	1	1		1	1	1	3.5	1
Day2	4	1.5	1	4	1	1	4	1	1		2	2.5	3	3	1
Day3	4	1	1.5	2	4	1	4	1	4		1.5	3	3	4	4
Day4	4	4	4	1.5	4	1	4	4	4		2	4	3.5	3.5	2.5
Day5	5.5	4	4	4	4	3	4	4	4		3	2.5	3.5	4.5	4.5
Day6	4	5	4	4	5	1	4	4	4		4	5	4	6	3.5
Day7	4	6.5	4	4	5	1	4	4	4		4.5	5	4.5	3.5	4.5
Day8	4	5.5	4	4	5	4	4	4	4		3.5	4.5	6	6	3.5
WT_saline	M1	M2	M3	M4	M5	M6	M7	M8	M9		M1	M2	M3	M4	M5
Day1	0	0	0	0	0	0	0	0	0		0	0	0	0	0
Day2	0	0	0	0	0	0	0	0	0		0	0	0	0	0
Day3	0	0	0	0	0	0	0	0	0		0	0	0	0	0
Day4	0	0	0	0	0	0	0	0	0		0	0	0	0	0
Day5	0	0	0	0	0	0	0	0	0		0	0	0	0	0
Day6	0	0	0	0	0	0	0	0	0		0	0	0	0	0
Day7	0	0	0	0	0	0	0	0	0		0	0	0	0	0
Day8	0	0	0	0	0	0	0	0	0		0	0	0	0	0
K0_saline	M1	M2	M3	M4	M5	M6	M7	M8	M9		N10	N11	N12	N13	N14
Day1	0	0	0	0	0	0	0	0	0		0	0	0	0	0
Day2	0	0	0	0	0	0	0	0	0		0	0	0	0	0
Day3	0	0	0	0	0	0	0	0	0		0	0	0	0	0
Day4	0	0	0	0	0	0	0	0	0		0	0	0	0	0
Day5	0	0	0	0	0	0	0	0	0		0	0	0	0	0
Day6	0	0	0	0	0	0	0	0	0		0	0	0	0	0
Day7	0	0	0	0	0	0	0	0	0		0	0	0	0	0
Day8	0	0	0	0	0	0	0	0	0		0	0	0	0	0

## Sheet: Figure 1E
Control	CRE
eEPSC	eEPSC
-255.92	-317.459
-91.6	-78.6993
-102.153	-135.624
-245.601	-217.144
-253.127	-229.964
-458.793	-117.955
-283.323	-244.131
-449.397	-283.332
-234.401	-341.951
-353.289	-273.706

## Sheet: Figure 1F
Control	CRE
eEPSC PPR	eEPSC PPR
1.32326	1.099
0.771429	1.1648
1.66286	2.50911
1.17147	0.896959
0.814548	0.771492
0.946479	0.441176
1.57143	1.32958
1.54144	1.31849
1.77603	2.02329
1.23508	2.24756

## Sheet: Figure 1G
Control	CRE
eIPSC	eIPSC
1337.61	785.938
596.69	352.115
1003.54	1056.32
978.036	1364.45
1088.4	709.236
2331.35	408.922
950.987	584.551
1649.56	461.667
2173.6	876.571
1140.96	822.8

## Sheet: Figure 1H
Control	CRE
eIPSC PPR	eIPSC PPR
0.637842	0.369154
0.799778	0.5
0.67755	0.632248
0.632642	0.70412
0.57566	0.758651
0.642478	0.31338
0.632747	0.761077
0.627882	0.598184
0.68185	0.90321
0.68393	1.76536

## Sheet: Figure 1I
Control						CRE
EPSC	IPSC		E I ratio			EPSC	IPSC		E I ratio
-255.92	1337.61	-0.191326	0.191326			-317.459	785.938	-0.403924	0.403924
-91.6	596.69	-0.153514	0.153514			-78.6993	352.115	-0.223505	0.223505
-102.153	1003.54	-0.101793	0.101793			-135.624	1056.32	-0.128393	0.128393
-245.601	978.036	-0.251117	0.251117			-217.144	1364.45	-0.159144	0.159144
-253.127	1088.4	-0.232568	0.232568			-229.964	709.236	-0.324242	0.324242
-458.793	2331.35	-0.196793	0.196793			-117.955	408.922	-0.288454	0.288454
-283.323	950.987	-0.297925	0.297925			-244.131	584.551	-0.417638	0.417638
-449.397	1649.56	-0.272434	0.272434			-283.332	461.667	-0.613715	0.613715
-234.401	2173.6	-0.10784	0.10784			-341.951	876.571	-0.390101	0.390101
-353.289	1140.96	-0.309642	0.309642			-273.706	822.8	-0.332652	0.332652

## Sheet: Figure 1K
	Control									Cre							eEPSC amplitude
Peak amplitude (pA)	Cumulative Probability (%)								Peak amplitude (pA)	Cumulative Probability (%)								Average mEPSC Amplitude (pA)
0	0	0	0	0	0	0	0		0	0	0	0	0	0	0	0		Control		Cre
2	0	0	0	0	0	0	0		2	0	0	0	0	0	5.37	0		-6.62397		-4.39936
4	0.99	2.25	3.13	19.33	30.36	10.26	8.43		4	44.82	5.29	13.26	10.85	13.86	49.64	10.95		-8.00948		-7.71815
6	39.11	41.74	54.7	52.06	72.36	60.26	39.03		6	93.03	40.59	65.91	53.65	42.92	77.29	53.51		-8.06473		-6.08177
8	83.65	73.18	77.66	67.01	82.93	84.6	59.11		8	96.96	65.88	84.09	82.64	64.98	89.7	79.86		-7.98299		-6.37261
10	96.06	85.8	82.88	74.74	89.88	92.72	74.85		10	98.69	85.29	92.42	91.32	76.45	94.12	91.08		-5.92531		-7.88403
12	99.31	90.55	86.01	80.67	93.2	96.03	85.25		12	99.24	91.76	95.83	95.86	85.39	96.08	97.3		-6.20327		-4.89002
14	99.61	92.14	87.89	87.37	96.07	97.52	90.71		14	99.7	94.12	96.97	98.03	90.76	97.02	98.38		-8.13929		-6.37908
16	99.9	93.66	88.94	89.43	97.13	98.34	95.04		16	99.83	95.88	98.48	98.62	94.63	97.61	99.32
18	99.9	94.98	90.4	92.27	98.04	99.83	96.65		18	100	96.47	99.62	99.8	96.57	98.33	99.59
20	100	95.9	92.9	94.59	98.49	99.83	97.52		20	100	97.65	99.62	100	97.76	98.77	99.73
22	100	96.83	94.36	96.39	98.64	100	98.64		22	100	98.24	99.62	100	98.66	99.49	99.86
24	100	97.23	95.41	96.91	98.94	100	99.13		24	100	98.24	100	100	98.96	99.78	99.86
26	100	97.56	96.66	98.2	99.24	100	99.26		26	100	98.24	100	100	99.11	99.85	100
28	100	97.75	97.91	99.74	99.55	100	99.5		28	100	98.82	100	100	99.4	100	100
30	100	98.35	98.96	100	99.85	100	99.88		30	100	99.41	100	100	99.55	100	100
32	100	98.55	99.16	100	99.85	100	99.88		32	100	99.41	100	100	99.7	100	100
34	100	98.81	100	100	99.85	100	100		34	100	100	100	100	99.7	100	100
36	100	98.88	100	100	99.85	100	100		36	100	100	100	100	99.85	100	100
38	100	99.21	100	100	100	100	100		38	100	100	100	100	99.85	100	100
40	100	99.41	100	100	100	100	100		40	100	100	100	100	99.85	100	100
42	100	99.54	100	100	100	100	100		42	100	100	100	100	99.85	100	100
44	100	99.54	100	100	100	100	100		44	100	100	100	100	99.85	100	100
46	100	99.67	100	100	100	100	100		46	100	100	100	100	99.85	100	100
48	100	99.67	100	100	100	100	100		48	100	100	100	100	99.85	100	100
50	100	99.67	100	100	100	100	100		50	100	100	100	100	100	100	100
52	100	99.67	100	100	100	100	100		52	100	100	100	100	100	100	100
54	100	99.67	100	100	100	100	100		54	100	100	100	100	100	100	100
56	100	99.8	100	100	100	100	100		56	100	100	100	100	100	100	100
58	100	99.8	100	100	100	100	100		58	100	100	100	100	100	100	100
60	100	99.8	100	100	100	100	100		60	100	100	100	100	100	100	100
62	100	99.87	100	100	100	100	100		62	100	100	100	100	100	100	100
64	100	99.87	100	100	100	100	100		64	100	100	100	100	100	100	100
66	100	100	100	100	100	100	100		66	100	100	100	100	100	100	100
68	100	100	100	100	100	100	100		68	100	100	100	100	100	100	100
70	100	100	100	100	100	100	100		70	100	100	100	100	100	100	100
72	100	100	100	100	100	100	100		72	100	100	100	100	100	100	100
74	100	100	100	100	100	100	100		74	100	100	100	100	100	100	100
76	100	100	100	100	100	100	100		76	100	100	100	100	100	100	100
78	100	100	100	100	100	100	100		78	100	100	100	100	100	100	100
80	100	100	100	100	100	100	100		80	100	100	100	100	100	100	100

## Sheet: Figure 1L
	Control									Cre
Peak mEPSC frequency (Hz)	Cumulative Probability (%)								Peak mEPSC frequency (Hz)	Cumulative Probability (%)
0	0	0	0	0	0	0	0			0	0	0	0	0	0	0
0.5	85.11	94.25	57.11	59.69	72.01	69.77	78.91			98.06	37.35	52.31	64.43	68.66	91.5	74.02
1	96.35	99.34	80.13	80.36	87.59	86.88	90.57			100	56.63	70	82.41	88.96	98.18	90.53
1.5	98.62	99.93	90.79	89.66	95.46	93.02	95.91			100	66.87	80	89.53	96.57	98.91	96.62
2	99.31	100	96.03	95.35	97.58	96.35	97.39			100	75.3	87.31	93.87	98.66	99.71	98.92
2.5	99.7	100	97.7	96.64	98.64	98.5	98.76			100	80.12	89.23	96.44	99.7	100	99.73
3	99.9	100	98.74	97.67	99.24	98.84	99.5			100	81.33	91.92	98.42	99.85	100	100
3.5	100	100	99.37	98.97	99.55	99.34	99.75			100	86.14	94.23	99.01	99.85	100	100
4	100	100	99.58	98.97	99.7	99.67	99.75			100	88.55	95.38	99.01	99.85	100	100
4.5	100	100	100	98.97	99.85	99.83	100			100	90.36	96.54	99.41	99.85	100	100
5	100	100	100	99.22	99.85	100	100			100	92.77	97.31	99.41	99.85	100	100
5.5	100	100	100	99.22	100	100	100			100	93.37	98.46	100	100	100	100
6	100	100	100	99.48	100	100	100			100	95.78	98.85	100	100	100	100
6.5	100	100	100	99.48	100	100	100			100	96.39	99.62	100	100	100	100
7	100	100	100	99.48	100	100	100			100	96.99	99.62	100	100	100	100
7.5	100	100	100	99.74	100	100	100			100	97.59	99.62	100	100	100	100
8	100	100	100	99.74	100	100	100			100	98.8	99.62	100	100	100	100
8.5	100	100	100	99.74	100	100	100			100	98.8	100	100	100	100	100
9	100	100	100	99.74	100	100	100			100	99.4	100	100	100	100	100
9.5	100	100	100	99.74	100	100	100			100	99.4	100	100	100	100	100
10	100	100	100	100	100	100	100			100	100	100	100	100	100	100
Average mEPSC frequency (Hz)
	Control		Cre
	7.89308		17.1839
	10.2849		3.27321
	5.13695		4.42427
	5.76041		6.16285
	6.68633		6.70962
	6.34594		10.808
	9.18427		7.00715

## Sheet: Figure 1N 
Cumulative amplitude of mIPSC																					mIPSC amplitude
	Control									Cre											Control	Cre
0	0	0	0	0	0	0	0		0	0	0	0	0	0	0	0	0	0			7.45092	7.45984
2	0	0	0	0	0	0	0		2	0	0	0	0	0	0	0	0	0			9.42204	10.2801
4	0	0	0	1.03	0	20.59	25		4	0	0	0	5.31	1.57	0	0	31.31	9.84			10.6753	9.71768
6	24.73	7.81	1.69	32.99	6.54	91.18	85		6	27.93	1.78	2.5	48.31	33.86	11.66	43.84	83.84	41.8			6.7688	6.75132
8	66.67	33.13	23.1	80.41	30.84	97.06	97.5		8	60.36	24.68	26.67	77.29	65.35	42.33	79.45	98.99	61.48			10.4123	7.48097
10	90.86	67.5	55.77	95.88	55.14	100	100		10	88.29	53.44	63.33	90.82	83.46	65.64	93.15	100	70.49			4.78191	9.59289
12	97.85	82.19	73.24	100	73.83	100	100		12	97.3	76.59	85	96.62	93.7	79.14	97.26	100	77.05			4.77075	6.86238
14	99.46	92.19	81.69	100	85.51	100	100		14	99.1	88.55	95	98.55	99.21	88.34	98.63	100	82.79				4.81021
16	99.46	96.88	90.42	100	91.59	100	100		16	100	96.69	98.33	99.52	99.21	95.09	98.63	100	84.43				9.11164
18	99.46	98.13	95.21	100	96.26	100	100		18	100	98.73	99.17	99.52	99.21	95.71	98.63	100	89.34
20	100	99.38	97.18	100	96.26	100	100		20	100	99.49	100	99.52	100	97.55	100	100	93.44
22	100	100	97.46	100	98.13	100	100		22	100	99.75	100	100	100	98.77	100	100	95.08
24	100	100	99.44	100	99.53	100	100		24	100	99.75	100	100	100	99.39	100	100	96.72
26	100	100	99.72	100	99.53	100	100		26	100	99.75	100	100	100	99.39	100	100	96.72
28	100	100	99.72	100	99.53	100	100		28	100	99.75	100	100	100	99.39	100	100	96.72
30	100	100	100	100	99.53	100	100		30	100	99.75	100	100	100	99.39	100	100	98.36
32	100	100	100	100	99.53	100	100		32	100	99.75	100	100	100	100	100	100	99.18
34	100	100	100	100	100	100	100		34	100	99.75	100	100	100	100	100	100	100
36	100	100	100	100	100	100	100		36	100	100	100	100	100	100	100	100	100
38	100	100	100	100	100	100	100		38	100	100	100	100	100	100	100	100	100
40	100	100	100	100	100	100	100		40	100	100	100	100	100	100	100	100	100
42	100	100	100	100	100	100	100		42	100	100	100	100	100	100	100	100	100
44	100	100	100	100	100	100	100		44	100	100	100	100	100	100	100	100	100
46	100	100	100	100	100	100	100		46	100	100	100	100	100	100	100	100	100
48	100	100	100	100	100	100	100		48	100	100	100	100	100	100	100	100	100
50	100	100	100	100	100	100	100		50	100	100	100	100	100	100	100	100	100
52	100	100	100	100	100	100	100		52	100	100	100	100	100	100	100	100	100
54	100	100	100	100	100	100	100		54	100	100	100	100	100	100	100	100	100
56	100	100	100	100	100	100	100		56	100	100	100	100	100	100	100	100	100
58	100	100	100	100	100	100	100		58	100	100	100	100	100	100	100	100	100
60	100	100	100	100	100	100	100		60	100	100	100	100	100	100	100	100	100
62	100	100	100	100	100	100	100		62	100	100	100	100	100	100	100	100	100
64	100	100	100	100	100	100	100		64	100	100	100	100	100	100	100	100	100
66	100	100	100	100	100	100	100		66	100	100	100	100	100	100	100	100	100
68	100	100	100	100	100	100	100		68	100	100	100	100	100	100	100	100	100
70	100	100	100	100	100	100	100		70	100	100	100	100	100	100	100	100	100
72	100	100	100	100	100	100	100		72	100	100	100	100	100	100	100	100	100
74	100	100	100	100	100	100	100		74	100	100	100	100	100	100	100	100	100
76	100	100	100	100	100	100	100		76	100	100	100	100	100	100	100	100	100
78	100	100	100	100	100	100	100		78	100	100	100	100	100	100	100	100	100
80	100	100	100	100	100	100	100		80	100	100	100	100	100	100	100	100	100

## Sheet: Figure 1O
Cumulative Probability (%)										Cumulative Probability (%)											mIPSC frequency
Interevent interval (sec)	Control									Interevent interval (sec)	Cre										Control	Cre
0	0	0	0	0	0	0	0			0	0	0	0	0	0	0	0	0	0		1.49175	1.03688
0.5	19.46	58.62	42.94	12.77	20.66	10	10.71			0.5	11.11	43.62	12.93	24.27	15.32	19.25	9.23	15.96	19.13		3.12486	2.48966
1	44.32	84.01	70.62	23.4	43.66	20	14.29			1	25.93	75	32.76	44.66	38.71	38.51	32.31	27.66	39.13		2.35507	1.0489
1.5	57.84	94.36	83.9	40.43	62.91	36.67	21.43			1.5	34.26	88.52	43.1	64.08	47.58	54.04	36.92	42.55	53.91		1.07006	1.54
2	71.35	97.49	92.66	51.06	75.12	46.67	25			2	47.22	95.66	50	76.21	57.26	67.08	46.15	54.26	63.48		1.39263	1.17062
2.5	79.46	98.43	97.46	59.57	87.79	53.33	39.29			2.5	60.19	97.45	68.1	83.5	64.52	77.02	55.38	64.89	73.04		1.02025	1.21648
3	84.32	99.37	98.31	65.96	93.9	60	50			3	71.3	98.72	75	86.89	75.81	82.61	63.08	69.15	78.26		0.639772	0.731237
3.5	89.19	100	99.15	72.34	95.77	63.33	57.14			3.5	74.07	99.49	82.76	91.75	82.26	88.82	75.38	74.47	82.61			1.0447
4	93.51	100	99.72	74.47	96.71	73.33	67.86			4	77.78	99.74	87.93	95.63	84.68	91.93	76.92	81.91	86.09			1.38129
4.5	96.22	100	99.72	79.79	97.65	80	75			4.5	81.48	100	89.66	97.57	88.71	93.79	83.08	82.98	89.57
5	97.3	100	100	80.85	98.12	80	78.57			5	82.41	100	92.24	100	89.52	95.65	83.08	82.98	94.78
5.5	97.84	100	100	82.98	99.53	80	85.71			5.5	88.89	100	93.97	100	91.94	96.27	83.08	85.11	95.65
6	98.38	100	100	84.04	99.53	83.33	89.29			6	90.74	100	94.83	100	92.74	97.52	86.15	88.3	96.52
6.5	98.92	100	100	88.3	99.53	90	92.86			6.5	93.52	100	96.55	100	95.97	97.52	89.23	90.43	97.39
7	99.46	100	100	90.43	99.53	90	92.86			7	94.44	100	97.41	100	96.77	99.38	90.77	92.55	97.39
7.5	99.46	100	100	94.68	100	90	92.86			7.5	95.37	100	98.28	100	96.77	100	90.77	93.62	97.39
8	100	100	100	95.74	100	96.67	96.43			8	97.22	100	98.28	100	97.58	100	93.85	96.81	97.39
8.5	100	100	100	97.87	100	100	96.43			8.5	100	100	98.28	100	98.39	100	93.85	97.87	98.26
9	100	100	100	97.87	100	100	96.43			9	100	100	99.14	100	99.19	100	95.38	98.94	99.13
9.5	100	100	100	100	100	100	100			9.5	100	100	99.14	100	100	100	98.46	100	99.13
10	100	100	100	100	100	100	100			10	100	100	100	100	100	100	100	100	100
10.5	100	100	100	100	100	100	100			10.5	100	100	100	100	100	100	100	100	100
11	100	100	100	100	100	100	100			11	100	100	100	100	100	100	100	100	100
11.5	100	100	100	100	100	100	100			11.5	100	100	100	100	100	100	100	100	100
12	100	100	100	100	100	100	100			12	100	100	100	100	100	100	100	100	100
12.5	100	100	100	100	100	100	100			12.5	100	100	100	100	100	100	100	100	100
13	100	100	100	100	100	100	100			13	100	100	100	100	100	100	100	100	100
13.5	100	100	100	100	100	100	100			13.5	100	100	100	100	100	100	100	100	100
14	100	100	100	100	100	100	100			14	100	100	100	100	100	100	100	100	100
14.5	100	100	100	100	100	100	100			14.5	100	100	100	100	100	100	100	100	100
15	100	100	100	100	100	100	100			15	100	100	100	100	100	100	100	100	100
