# Supplementary material for: Endophilin A1 facilitates organization of the GABAergic postsynaptic machinery to maintain excitation-inhibition balance
Source: eLife. 2025 Oct 2;13:RP102792. doi: 10.7554/eLife.102792 (PMC12490859; doi:10.7554/eLife.102792)
Supplement: Figure 2—figure supplement 1—source data 1. [file elife-102792-fig2-figsupp1-data1.xlsx]

## Sheet: Fig2-s1C CA1_intensity-P21
	Brain_N1			Brain_N2			Brain_N3			Brain_N4			Brain_N5			Brain_N6				Brain_N7
	WT_CA1_intensity	KO_CA1_intensity		WT_CA1_intensity	KO_CA1_intensity		WT_CA1_intensity	KO_CA1_intensity		WT_CA1_intensity	KO_CA1_intensity		WT_CA1_intensity	KO_CA1_intensity		WT_CA1_intensity	KO_CA1_intensity			WT_CA1_intensity	KO_CA1_intensity
	417.029	413.026		642.015	443.618		384.584	304.955		537.59	347.368		435.732	387.462		491.387	428.739			422.732	405.191
	416.012	410.385		621.979	360.422		487.326	381.798		522.973	389.805		413.88	415.1		445.396	411.323			410	405.8
	374.882	409.37		578.482	161.073		545.158	352.982		342.173	413.314		478.525	400.35		394.08	378.709			405.43	390.995
	517.061	410.649		571.013	172.886		472.504	348.006		328.468	350.502		448.471	400.971		432.909	395.741			400.342	400.125
	535.165	405.517		421.774	266.01		475.69	406.889		369.677	366.052	Average	444.152	400.971		426.068	436.58			456.98	400.53
	530.163	339.822		402.486	237.127		537.59			475.666	329.907					460.292	327.319		Average	419.097	400.528
	534.24	373.951		237.095	171.047	Average	483.809	358.926		452.432	362.514					438.312	465.388
	484.721	429.163		265.719	180.497					446.078	409.315				Average	441.206	406.257
Average	476.159	398.985		312.347	274.625				Average	434.382	371.097
				220.184	275.485
				273.762	208.517
				404.919	204.892
				394.439	246.35
				407.168
			Average	410.956
	WT_CA1_intensity	KO_CA1_intensity	average	WT_CA1_intensity	KO_CA1_intensity
N1	476.159	398.985	444.252	1.07182	0.898107
N2	410.956	246.35	444.252	0.925052	0.554528
N3	483.809	358.926	444.252	1.08904	0.807935
N4	434.382	371.097	444.252	0.977784	0.835331
N5	444.152	400.971	444.252	0.999776	0.902576
N6	441.206	406.257	444.252	0.993145	0.914475
	419.097	400.528	444.252	0.943377	0.901579
Average	444.252

## Sheet: CA2_intensity-P21
	Brain_N1			Brain_N2			Brain_N3			Brain_N4			Brain_N5			Brain_N6
	WT_CA2_intensity	KO_CA2_intensity		WT_CA2_intensity	KO_CA2_intensity		WT_CA2_intensity	KO_CA2_intensity		WT_CA2_intensity	KO_CA2_intensity		WT_CA2_intensity	KO_CA2_intensity		WT_CA2_intensity	KO_CA2_intensity
	399.464	424.01		575.059	179.38		523.318	284.616		383.529	304.738		471.067	469.354		449.029	426.959
	411.664	429.741		303.303	284.81		545.959	293.584		443.185	336.805		419.853	458.53		444.176	419.958
	542.714	436.765		436.324	289.517		561.456	385.35		411.291	315.547		494.123	507.054		418.508	426.101
	565.264	346.736		475.874	308.943		372.417	338.792		418.744	335.548		469.743	526.099		485.357	434.124
	573.199	341.428		421.431	323.124	Average	500.788	325.586		457.487	323.16		457.396	431.831		364.584	419.342
Average	498.461	395.736		442.398	325.002				Average	422.847		Average	462.437	478.574		519.702	402.843
			Average	442.398	285.129											497.825	441.048
																490.744	424.339
																445.423
																459.109
															Average	457.446
	WT_CA2_intensity	KO_CA2_intensity	average	WT_CA2_intensity	KO_CA2_intensity
N1	498.461	395.736	464.936	1.07211	0.851162
N2	447.64	285.129	464.936	0.962799	0.613265
N3	500.788	325.586	464.936	1.07711	0.70028
N4	422.847	323.16	464.936	0.909474	0.695062
N5	462.437	478.574	464.936	0.994624	1.02933
N6	457.446	424.339	464.936	0.983889	0.912682
Average	464.936

## Sheet: CA3_intensity-P21
	Brain_N1			Brain_N2			Brain_N3			Brain_N4			Brain_N5			Brain_N6
	WT_CA3_intensity	KO_CA3_intensity		WT_CA3_intensity	KO_CA3_intensity		WT_CA3_intensity	KO_CA3_intensity		WT_CA3_intensity	KO_CA3_intensity		WT_CA3_intensity	KO_CA3_intensity		WT_CA3_intensity	KO_CA3_intensity
	297.876	325.334		444.846	317.119		272.621	348.649		346.942	326.588		365.494	374.908		395.229	363.505
	284.731	339.331		255.892	343.003		284.944	341.685		370	309.373		364.649	376.419		399.56	347.991
	278.57	296.336		269.795	248.027		406.683	337.68		359.216	306.758		369.487	412.773		365.248	358.788
	347.448	276.954		312.588	290.389		418.039	335.579		254.338	268.045		406.287	412.199		369.074	355.814
	321.55	273.954	Average	320.78	299.635		326.855	329.595		337.737	180.664		421.893	334.845		368.113	386.942
Average	306.035	302.382				Average	341.828	338.638	Average	333.647	278.286		331.065	453.305		461.798	326.107
												Average	376.479	394.075		452.817	356.524
																403.18
																396.712
																348.271
																390.423
															Average	395.493
	WT_CA3_intensity	KO_CA3_intensity	average	WT_CA3_intensity	KO_CA3_intensity
N1	306.035	302.382	345.71	0.885234	0.874667
N2	320.78	299.635	345.71	0.927887	0.866721
N3	341.828	338.638	345.71	0.988771	0.979542
N4	333.647	278.286	345.71	0.965104	0.804967
N5	376.479	394.075	345.71	1.089	1.1399
N6	395.493	356.524	345.71	1.144	1.03128
Average	345.71

## Sheet: DG_intensity-P21
	Brain_N1			Brain_N2			Brain_N3			Brain_N4			Brain_N5			Brain_N6
	WT_DG_intensity	KO_DG_intensity		WT_DG_intensity	KO_DG_intensity		WT_DG_intensity	KO_DG_intensity		WT_DG_intensity	KO_DG_intensity		WT_DG_intensity	KO_DG_intensity		WT_DG_intensity	KO_DG_intensity
	451.221	321.366		277.02	247.563		273.24	277.63		280.448	320.986		297.805	360.764		279.278	292.247
	298.504	207.466		227.894	298.883		301.364	257.822		259.206	301.057		371.287	354.45		357.223	280.826
	318.011	332.345		244.359	276.205		319.206	268.262		332.979	290.944		293.732	284.62		308.071	245.803
	231.573	196.488		172.075	300.341		280.194	254.175		299.717	399.109		304.521	324.175		317.899	291.243
	312.364	264.416		277.58	248.092		351.353	281.634		296.718	314.158		337.361	342.38	Average	315.618	254.674
	337.291		Average	239.786	274.217	Average	305.071	267.905		287.522	341.89	Average	320.941	333.278			272.958
Average	324.827									298.359	328.024
									Average	293.564
	WT_DG_intensity	KO_DG_intensity	Average	WT_DG_intensity	KO_DG_intensity
N1	324.827	264.416	299.968	1.08287	0.881482
N2	239.786	274.217	299.968	0.799372	0.914154
N3	305.071	267.905	299.968	1.01701	0.893111
N4	293.564	328.024	299.968	0.978651	1.09353
N5	320.941	333.278	299.968	1.06992	1.11104
N6	315.618	272.958	299.968	1.05217	0.909958
Average	299.968

## Sheet: Fig2-s1C CA1_intensity-P60
	Brain_N1			Brain_N2			Brain_N3			Brain_N4			Brain_N5			Brain_N6
	WT_CA1_intensity	KO_CA1_intensity		WT_CA1_intensity	KO_CA1_intensity		WT_CA1_intensity	KO_CA1_intensity		WT_CA1_intensity	KO_CA1_intensity		WT_CA1_intensity	KO_CA1_intensity		WT_CA1_intensity	KO_CA1_intensity
	2306.4	2411.19		2608.44	2399.37		2327.03	2564.72		2066.18	2375.36		2215.51	2930.78		2164.73	3175.04
	2329.88	2429.28		2635.2	2038.22		1976.24	2546.09		2311.18	2537.05		2374.27	2620.4		2100.27	3270.29
	2398.39	2537.22		2757.22	2317.45		1944.52	2338.38		2334.9	2169.99		2153.22	2741.11		2199.21	3473.21
	2237.89	2303.25		2576.11	2034.52		1904.11	2388.44		2365.34	2208.03		2356.09	2661.33		2065.79	3414.54
Average	2318.14	2420.23		2532.12	2304.42		2004.34	2577.69		2210.33	2513.56		2375.35	2924.31	Average	2132.5	3197
			Average	2621.82	2218.79		2339.34	2483.06		2136.59	2360.8	Average	2294.89	2775.59			3086.29
						Average	2082.6		Average	2237.42							3043.58
																	3237.14
	WT_CA1_intensity	KO_CA1_intensity	average	WT_CA1_intensity	KO_CA1_intensity
N1	2318.14	2420.23	2281.23	1.01618	1.06093
N2	2621.82	2218.79	2281.23	1.1493	0.972632
N3	2082.6	2483.06	2281.23	0.912928	1.08848
N4	2237.42	2360.8	2281.23	0.980797	1.03488
N5	2294.89	2775.59	2281.23	1.00599	1.21671
N6	2132.5	3237.14	2281.23	0.934804	1.41903
Average	2281.23

## Sheet: CA2_intensity-P60
	Brain_N1			Brain_N2			Brain_N3			Brain_N4			Brain_N5			Brain_N6
	WT_CA2_intensity	KO_CA2_intensity		WT_CA2_intensity	KO_CA2_intensity		WT_CA2_intensity	KO_CA2_intensity		WT_CA2_intensity	KO_CA2_intensity		WT_CA2_intensity	KO_CA2_intensity		WT_CA2_intensity	KO_CA2_intensity
	2623.33	2448.57		2502.54	1553.92		2444.5	3639.2		2357.81	3531.13		2488.95	1947.36		2337.88	1604.93
	2548.62	2310.43		2919.23	2556.25		2305.47	3767.76		2612.66	1943.8		2312.02	1528.75		2320.46	1738.03
	2423.18	1985.47		2837.61	2527.07		2276.01	3544.13		2496.74	2684.22		2370.55	1611		2414.22	1440.34
	2322.89	2598.11		2668	2447.32		2479.22	3546.57		2214.32	2867.61		2438.22	1821.11		2249.34	1484.07
	2823.37	1993.27		3020	2202.88		2297.16	3754.15		2744.64	2660.56		2392.68	1782.06		2465.7	1566.84
	2448.86	2153.19		2571.37	1987.04		2249.6	3650.36	Average	2485.23	2737.47	Average	2400.48	1738.06	Average	2357.52
Average	2531.71	2248.17	Average	2753.12	2212.41	Average	2341.99
	WT_CA2_intensity	KO_CA2_intensity	average	WT_CA2_intensity	KO_CA2_intensity
N1	2531.71	2248.17	2478.34	1.02153	0.907127
N2	2753.12	2212.41	2478.34	1.11087	0.892699
N3	2341.99	3650.36	2478.34	0.944983	1.4729
N4	2485.23	2737.47	2478.34	1.00278	1.10455
N5	2400.48	1738.06	2478.34	0.968584	0.701298
N6	2357.52	1566.84	2478.34	0.951248	0.632213
Average	2478.34

## Sheet: CA3_intensity-P60
	Brain_N1			Brain_N2			Brain_N3			Brain_N4			Brain_N5			Brain_N6
	WT_CA3_intensity	KO_CA3_intensity		WT_CA3_intensity	KO_CA3_intensity		WT_CA3_intensity	KO_CA3_intensity		WT_CA3_intensity	KO_CA3_intensity		WT_CA3_intensity	KO_CA3_intensity		WT_CA3_intensity	KO_CA3_intensity
	2679.4	2383.84		3128.48	1923.83		3064.34	2459.93		2006.67	2194.33		2637.83	3755.52		2551.56	1762.07
	2661.95	2303.46		3024.47	1697.8		3002.67	2264.43		1879.26	2248.2		2836.69	3203.79		2936.45	2062.73
	2574.63	2211.45		3067.77	1845.96		3016.9	2433.08		1927.45	2103.77		2147.48	3479.67		2964.09	2178.37
	2890.02	2354.27		2921.78	1873.87		3062.75	2239.18		1953.89	2456.07		2426.71	3379.36		2271.51	1953.1
	2547.36	2465.22		3239.87	1712.62		3020.87	2414.27		1947.56	2403.59	Average	2512.17	3579.93	Average	2680.9	2079.79
Average	2670.67	2343.65	Average	3076.47	1810.82	Average	3033.5	2362.18	Average	1942.97	1921.62			3479.65			1970.29
											2221.27						2001.06
	WT_CA3_intensity	KO_CA3_intensity	average	WT_CA3_intensity	KO_CA3_intensity
N1	2670.67	2343.65	2652.78	1.00674	0.883468
N2	3076.47	1810.82	2652.78	1.15972	0.68261
N3	3033.5	2362.18	2652.78	1.14352	0.890454
N4	1942.97	2221.27	2652.78	0.732426	0.837334
N5	2512.17	3479.65	2652.78	0.946996	1.3117
N6	2680.9	2001.06	2652.78	1.0106	0.754324
average	2652.78

## Sheet: DG_intensity-P60
	Brain_N1			Brain_N2			Brain_N3			Brain_N4			Brain_N5			Brain_N6
	WT_DG_intensity	KO_DG_intensity		WT_DG_intensity	KO_DG_intensity		WT_DG_intensity	KO_DG_intensity		WT_DG_intensity	KO_DG_intensity		WT_DG_intensity	KO_DG_intensity		WT_DG_intensity	KO_DG_intensity
	2191.11	2126.32		2330.17	2353.98		2219.34	2316.54		2237.13	1846.22		2779.33	3531.44		2968.78	3248.17
	2364.34	2138.55		2509.39	2261.13		2562.64	2254.19		2069.63	1739.38		2846.33	3169.91		3087.22	3510.45
	2337.89	2370.85		2622.65	2109.48		2164.56	2109.23		2152.3	1652.45		2856.5	3335.77		2995.31	3389.83
	2414.74	2551.86		2549.22	2380.2		2470.15	2025.04		2309.95	1813.97		2921.17	3466.84		3113.77	3410.66
	2330.34	2441.34		2480.98	2550.75	Average	2354.17	2413.75		2190.93	1839.05		2917.39	3224.5		2861.7	3567.96
Average	2327.69	2325.78	Average	2498.48	2331.11			2223.75	Average	2191.99	1778.21	Average	2864.15	3345.69		3005.36	3425.41
															Average
	WT_DG_intensity	KO_DG_intensity	Average	WT_DG_intensity	KO_DG_intensity
N1	2327.69	2325.78	2540.31	0.916301	0.915553
N2	2498.48	2331.11	2540.31	0.983536	0.917649
N3	2354.17	2223.75	2540.31	0.926729	0.875387
N4	2191.99	1778.21	2540.31	0.862884	0.699999
N5	2864.15	3345.69	2540.31	1.12748	1.31704
N6	3005.36	3425.41	2540.31	1.18307	1.34843
Average	2540.31		2540.31
