# Supplementary material for: Endophilin A1 facilitates organization of the GABAergic postsynaptic machinery to maintain excitation-inhibition balance
Source: eLife. 2025 Oct 2;13:RP102792. doi: 10.7554/eLife.102792 (PMC12490859; doi:10.7554/eLife.102792)
Supplement: Figure 2—figure supplement 1—source data 2. [file elife-102792-fig2-figsupp1-data2.xlsx]

## Sheet: Fig 2-s1F CA1_intensity-P21
	Brain_N1			Brain_N2			Brain_N3			Brain_N4			Brain_N5			Brain_N6
	WT_CA1_intensity	KO_CA1_intensity		WT_CA1_intensity	KO_CA1_intensity		WT_CA1_intensity	KO_CA1_intensity		WT_CA1_intensity	KO_CA1_intensity		WT_CA1_intensity	KO_CA1_intensity		WT_CA1_intensity	KO_CA1_intensity
	1559.38	1537.98		2520.54	2273.91		1659.28	2042.17		1653.48	1618.9		2096.95	1584.24		2603.15	1524.78
	1561.35	1226.22		2492.06	2086.76		2045.62	843.912		1534.68	1748.89		2065.72	1949.56		2377.15	1410.23
	1617.92	1068.86		2744.58	1948.25		1294.67	771.207		1187.74	1226.94		2469.73	962.406		2019.2	1531.94
	1485.39	1293.73		1712.77	2156.88		1344.49	1457.34		1114.46	1170		2026.09	995.741		1987.53	1320.22
	1639.5	997.847		2012.18	1851.44		1409.03	1420.76	Average	1372.59	1441.18	Average	2164.62	1372.99		1574.09	1550.34
	1592.7	1224.93	Average	2296.43	2063.45		1846.58	1288.63								1621.81	1467.5
Average	1576.04					Average	1599.94	1304							Average	2030.49
	WT_CA1_intensity	KO_CA1_intensity	average	WT_CA1_intensity	KO_CA1_intensity
N1	1576.04	1224.93	1840.02	0.856535	0.665714
N2	2296.43	2063.45	1841.02	1.24737	1.12082
N3	1599.94	1304	1842.02	0.868581	0.707921
N4	1372.59	1441.18	1843.02	0.744752	0.781969
N5	2164.62	1372.99	1844.02	1.17386	0.744561
N6	2030.49	1467.5	1845.02	1.10052	0.795385
Average	1840.02
															2030.49

## Sheet: CA2_intensity-P21
	Brain_N1			Brain_N2			Brain_N3			Brain_N4			Brain_N5			Brain_N6
	WT_CA2_intensity	KO_CA2_intensity		WT_CA2_intensity	KO_CA2_intensity		WT_CA2_intensity	KO_CA2_intensity		WT_CA2_intensity	KO_CA2_intensity		WT_CA2_intensity	KO_CA2_intensity		WT_CA2_intensity	KO_CA2_intensity
	2420.86	1422.44		1075.15	1974.9		2288.7	930.747		1300.38	1690.06		1329.51	1383.51		2170.96	1709.98
	1836.85	1365.25		2029.95	1975.9		2310.83	1094.76		1408.11	1328.65		2425.56	1600.58		1633.17	1009.52
	1398.09	1974.9		2171.52	2136.81		2050.78	1084		1368.43	1555.89		2373.43	1551.82		2662.66	1028.52
	1831.22	1522.18		1999.23	2011.24		2108.65	1163.92		1238.22	1621.1		2268.4	1465.73		2754.47	1274.11
	1939.32	1652.88		1518.52	2047.17		1969.14	1068.35		1402.85	1447.02		2170.96	1337.23		2690.3	1303.54
Average	1885.27	1587.53	Average	1758.87	2029.21	Average	2145.62			1435.85	1413.41	Average	2113.57	1613.41		1872.81	1296.88
									Average	1358.97	1509.36			1492.05		1882.9	1122.83
																1387.63	1249.34
																1424.11
																1934.55
															Average	2041.35
	WT_CA2_intensity	KO_CA2_intensity	average	WT_CA2_intensity	KO_CA2_intensity
N1	1885.27	1587.53	1883.94	1.0007	0.842663
N2	1758.87	2029.21	1884.94	0.933117	1.07653
N3	2145.62	1068.35	1885.94	1.13769	0.566483
N4	1358.97	1509.36	1886.94	0.720199	0.799895
N5	2113.57	1492.05	1887.94	1.11951	0.790303
N6	2041.35	1249.34	1888.94	1.08069	0.661397
Average	1883.94

## Sheet: CA3_intensity-P21
	Brain_N1			Brain_N2			Brain_N3			Brain_N4			Brain_N5			Brain_N6
	WT_CA3_intensity	KO_CA3_intensity		WT_CA3_intensity	KO_CA3_intensity		WT_CA3_intensity	KO_CA3_intensity		WT_CA3_intensity	KO_CA3_intensity		WT_CA3_intensity	KO_CA3_intensity		WT_CA3_intensity	KO_CA3_intensity
	2178.04	1603.1		2131.68	1782.78		2202.1	1231.37		1314.98	1988.2		1564.02	1551.32		2472.86	1131.6
	2243.89	1556.57		772.602	1151.05		1959.77	932.27		1104.32	1443.52		2350.55	1538.84		2016.11	1249.8
	1377.01	1594.89		2380.69	874		1762.35	1881.62		1553.37	1699.29		2435.04	1460.16		2066.16	1460.42
	1201.69	1438.52		2151.63	816.134		1494.43	2020.62		1568.51	1553.14		2464.3	1477.39		1755.53	1404.53
Average	1750.16	1548.27		2116.25	1091.91		832.038	1907.62		1322.45	1620.91		2439.32	1577.34		1556.65	1330.23
			Average	1910.57	1143.17		1804.83	1891.12		1448.13	1661.01	Average	2250.65	1598.78		1436.09	1425.64
							1773.93	1174.97	Average	1385.29				1533.97		1388	1333.7
						Average	1689.92	1284.66							Average	1813.06
								1277.34
								1511.29
	WT_CA3_intensity	KO_CA3_intensity	average	WT_CA3_intensity	KO_CA3_intensity
N1	1750.16	1548.27	1799.94	0.972342	0.860178
N2	1910.57	1143.17	1799.94	1.06146	0.635118
N3	1689.92	1511.29	1799.94	0.938876	0.839633
N4	1385.29	1661.01	1799.94	0.769633	0.922815
N5	2250.65	1533.97	1799.94	1.2504	0.852234
N6	1813.06	1333.7	1799.94	1.00729	0.740971
Average	1799.94

## Sheet: DG_intensity-P21
	Brain_N1			Brain_N2			Brain_N3			Brain_N4			Brain_N5			Brain_N6
	WT_DG_intensity	KO_DG_intensity		WT_DG_intensity	KO_DG_intensity		WT_DG_intensity	KO_DG_intensity		WT_DG_intensity	KO_DG_intensity		WT_DG_intensity	KO_DG_intensity		WT_DG_intensity	KO_DG_intensity
	1460.71	1435.44		2268.65	1159.38		1641.5	2222.62		1221.26	1586.41		2089.11	782.351		2193.84	723.144
	1317.01	2231.75		1843	1070.96		1804.23	1372.69		1188.01	1008.25		1414.19	871.316		1516.29	871.553
	1744.68	1120.75		1040.91	814.654		1569.65	1143.58		1253.22	1332.77		1389.03	990.231		1603.78	889.243
	1671.27	1566.89		1006.17	851.067		1522.09	986.345		1169.83	1269.03		1889.07	869.021	Average	1771.3	705.454
	1343.66	1625.07	Average	1539.68	974.015		1821.49	1431.31		1190.85	1290.18		1976.85	621.248			797.348
Average	1507.47	1595.98				Average	1671.79		Average	1204.63	1297.33	Average	1751.65	826.833
	WT_DG_intensity	KO_DG_intensity	Average	WT_DG_intensity	KO_DG_intensity
N1	1507.47	1595.98	1574.42	0.957473	1.01369
N2	1539.68	974.015	1574.42	0.977935	0.61865
N3	1671.79	1431.31	1574.42	1.06185	0.909101
N4	1204.63	1297.33	1574.42	0.765128	0.824003
N5	1751.65	826.833	1574.42	1.11257	0.525166
N6	1771.3	797.348	1574.42	1.12505	0.506439
Average	1574.42

## Sheet: Fig 2-s1F CA1_intensity-P60
	Brain_N1			Brain_N2			Brain_N3			Brain_N4			Brain_N5			Brain_N6
	WT_CA1_intensity	KO_CA1_intensity		WT_CA1_intensity	KO_CA1_intensity		WT_CA1_intensity	KO_CA1_intensity		WT_CA1_intensity	KO_CA1_intensity		WT_CA1_intensity	KO_CA1_intensity		WT_CA1_intensity	KO_CA1_intensity
	1248.11	1673.32		2330.87	1694.07		2356.58	1492.82		2426.6	1662.37		2342.98	1713.18		1696.93	1601
	1364.82	1910.06		2170.74	1903.84		2632.51	1402.46		2383.91	1422		2680.87	1713.59		1771.07	1474.58
	1965.11	1779.25		2310.88	1707.7		2531.02	1552.02		2501.02	1551.02		2489.03	1820.12		1850.41	1522.01
	1667.19	1791.69		2289.13	1801.28		2331.09	1400.22		2487.03	1489.08		2576.22	1699		1772.88	1500.27
	1384.84	1804.12		2152.39	1735.8		2621.52	1390.67		2227.7	1586.44		2470.53	1621.02		1772.72	1591.1
Average	1526.01	1791.69	Average	2250.8	1768.54	Average	2494.55	1447.64	Average	2405.25	1542.18	Average	2511.93	1713.38	Average	1772.8	1537.79
	WT_CA1_intensity	KO_CA1_intensity	Average	WT_CA1_intensity	KO_CA1_intensity
N1	1526.01	1791.69	2160.22	0.706415	0.829399
N2	2250.8	1768.54	2160.22	1.04193	0.818683
N3	2494.55	1447.64	2160.22	1.15476	0.670133
N4	2405.25	1542.18	2160.22	1.11343	0.7139
N5	2511.93	1713.38	2160.22	1.16281	0.793149
N6	1772.8	1537.79	2160.22	0.820657	0.711867
Average	2160.22

## Sheet: CA2_intensity-P60
	Brain_N1			Brain_N2			Brain_N3			Brain_N4			Brain_N5			Brain_N6
	WT_CA2_intensity	KO_CA2_intensity		WT_CA2_intensity	KO_CA2_intensity		WT_CA2_intensity	KO_CA2_intensity		WT_CA2_intensity	KO_CA2_intensity		WT_CA2_intensity	KO_CA2_intensity		WT_CA2_intensity	KO_CA2_intensity
	1411.43	1748.74		1813.3	1625.72		2097.25	1442.38		2029.74	922.686		1895.8	1293.34		1910.19	1502.3
	1453.62	2325.94		1919.14	1982.86		933.052	1224.09		2007.34	1287.08		1687.86	1372.65		2032.29	1398.05
	1436.44	2203.74		1924.37	1893.02		924.272	1261.58		2040.76	997.264		1808.77	1428.94		1978.23	1406.25
	1332.87	2018.25		1952.84	1993.57		1327.88	1377.48		2068.12	1100.84		1846.43	1227.94		2039.92	1413.77
	1332.37	1982.05		1721.46	1526.27		1308.51	1241.22		1983.77	1216.54		1720.28	1342.11		2091.11	1281.67
	1628.41	1945.34	Average	1866.22	1804.29	Average	1318.19	1309.35	Average	2025.94	1104.88	Average	1791.83	1333		1775.69	1400.41
Average	1432.52	2037.34														1971.24
	WT_CA2_intensity	KO_CA2_intensity	average	WT_CA2_intensity	KO_CA2_intensity
N1	1432.52	2037.34	1734.32	0.825983	1.17472
N2	1866.22	1804.29	1734.32	1.07605	1.04034
N3	1318.19	1309.35	1734.32	0.76006	0.754963
N4	2025.94	1104.88	1734.32	1.16815	0.637067
N5	1791.83	1333	1734.32	1.03316	0.768598
N6	1971.24	1400.41	1734.32	1.1366	0.807465
Average	1734.32

## Sheet: CA3_intensity-P60
	Brain_N1			Brain_N2			Brain_N3			Brain_N4			Brain_N5			Brain_N6
	WT_CA3_intensity	KO_CA3_intensity		WT_CA3_intensity	KO_CA3_intensity		WT_CA3_intensity	KO_CA3_intensity		WT_CA3_intensity	KO_CA3_intensity		WT_CA3_intensity	KO_CA3_intensity		WT_CA3_intensity	KO_CA3_intensity
	1309.25	1880.26		1655.58	1720.7		2192.36	1394.54		1732.09	1920.48		1969.66	1473.4		1483.42	1588.58
	1395.77	1721.04		1894.92	2323.22		2324.83	1429.85		1982.29	1994.83		2409.49	1759.15		1701.48	1741.36
	1271.32	1704.82		1674.89	2321.37		2363.74	1504.29		1753.67	1803.52		2286.32	1697.47		1780.55	1699.03
	1262.37	1818.57		2428.68	2148.64		2245.03	1552.02		1821.38	1657.64		2230	1704.82		1810.22	1712.08
Average	1309.68	1781.17		1913.52	1729.24		2167.01	1333.77		1996.51	1844.12		2052.39	1446.52		1500.08	1583.8
					2048.63		2258.59	1442.89		1857.19			2189.57	1616.27		1655.15	1664.97
	WT_CA3_intensity	KO_CA3_intensity	Average	WT_CA3_intensity	KO_CA3_intensity
N1	1309.68	1781.17	1863.95	0.702635	0.95559
N2	1913.52	2048.63	1863.95	1.02659	1.09908
N3	2258.59	1442.89	1863.95	1.21172	0.774105
N4	1857.19	1844.12	1863.95	0.996373	0.989361
N5	2189.57	1616.27	1863.95	1.17469	0.867123
N6	1655.15	1664.97	1863.95	0.88798	0.893249
Average	1863.95

## Sheet: DG_intensity-P60
	Brain_N1			Brain_N2			Brain_N3			Brain_N4			Brain_N5			Brain_N6
	WT_DG_intensity	KO_DG_intensity		WT_DG_intensity	KO_DG_intensity		WT_DG_intensity	KO_DG_intensity		WT_DG_intensity	KO_DG_intensity		WT_DG_intensity	KO_DG_intensity		WT_DG_intensity	KO_DG_intensity
	1220.22	1510.17		2045.66	1343.34		2078.45	2062.52		2109.33	1674.63		1772.38	1535.5		2201.33	1300.77
	1763.74	1542.96		1971.63	1620.1		2235.49	1916.1		2011.24	1833.6		1238.9	1135.12		2011.89	1575.1
	1643.16	1548.93		2299.74	1272.47		2401.26	1882.5		2183.91	1802.47		1502.19	1303.2		1943.2	1219.39
	1399.08	1499.03		2318.54	1558.94		2019.24	1996.71		1829.6	1705.75		1626.13	1107.04		1948.62	1377.84
	1685.66	1569		2387.51	1325.48		2050.42	1873.79		2033.52	1754.11		1287.89	1270.21		2026.26	1524.7
	1542.37	1534.02		2204.62	1424.06		2156.97	1946.32					1485.5				1399.56
	WT_DG_intensity	KO_DG_intensity	Average	WT_DG_intensity	KO_DG_intensity
N1	1542.37	1534.02	1908.21	0.808284	0.803905
N2	2204.62	1424.06	1908.21	1.15533	0.746284
N3	2156.97	1946.32	1908.21	1.13037	1.01997
N4	2033.52	1754.11	1908.21	1.06567	0.919247
N5	1485.5	1270.21	1908.21	0.778479	0.665658
N6	2026.26	1399.56	1908.21	1.06187	0.733444
Average	1908.21
