# Supplementary material for: Endophilin A1 facilitates organization of the GABAergic postsynaptic machinery to maintain excitation-inhibition balance
Source: eLife. 2025 Oct 2;13:RP102792. doi: 10.7554/eLife.102792 (PMC12490859; doi:10.7554/eLife.102792)
Supplement: Figure 2—figure supplement 1—source data 3. [file elife-102792-fig2-figsupp1-data3.xlsx]

## Sheet: Fig 2-s1H
WT_CA1_sr+slm	KO_CA1_sr+slm		WT_CA1_sr+slm	KO_CA1_sr+slm		WT_CA1_sp	KO_CA1_sp		WT_CA1_sp	KO_CA1_sp		WT_CA1-so	KO_CA1-so		WT_CA1-so	KO_CA1-so
942.723	895.923	1010.81	0.932644	0.886344		964.701	941.765	1004.06	0.960796	0.937953		975.917	904.123	1020.05	0.956736	0.886353
1114.85	783.857	1010.81	1.10294	0.775477		1054.42	821.48	1004.06	1.05015	0.818155		1127.86	756.615	1020.05	1.1057	0.741743
1024.18	554.37	1010.81	1.01323	0.548443		926.987	527.548	1004.06	0.923235	0.525412		1175.86	577.009	1020.05	1.15275	0.565668
989.976	554.37	1010.81	0.979392	0.548443		1073.01	685.379	1004.06	1.06867	0.682605		866.599	523.982	1020.05	0.849566	0.513684
1032.78	1029.17	1010.81	1.02174	1.01816		1026.34	1095.64	1004.06	1.02218	1.0912		1024.92	1036.87	1020.05	1.00478	1.01649
960.325	872.346	1010.81	0.950059	0.86302		978.93	775.842	1004.06	0.974967	0.772702		949.134	941.461	1020.05	0.930478	0.922956
1010.81						1004.06						1020.05
WT_CA2-sr+slm	KO_CA2-sr+slm		WT_CA2-sr+slm	KO_CA2-sr+slm		WT_CA2-sp	KO_CA2-sp		WT_CA2-sp	KO_CA2-sp		WT_CA2-so	KO_CA2-so		WT_CA2-so	KO_CA2-so
913.758	870.511	1017.46	0.898079	0.855574		870.266	807.222	1002.13	0.868413	0.805504		960.147	855.158	1024.14	0.937514	0.835
1089.1	777.616	1017.46	1.07042	0.764273		1120.35	754.576	1002.13	1.11796	0.75297		944.035	855.814	1024.14	0.921783	0.835641
1029.15	724.212	1017.46	1.01149	0.711785		973.839	752.396	1002.13	0.971766	0.750795		1180.23	800.116	1024.14	1.15241	0.781256
958.459	817.212	1017.46	0.942014	0.803189		921.068	969.25	1002.13	0.919108	0.967187		955.031	909.61	1024.14	0.932519	0.888169
1026.31	812.402	1017.46	1.0087	0.798462		1145.01	924.253	1002.13	1.14257	0.922286		1039.28	646.67	1024.14	1.01478	0.631427
1087.97	861.378	1017.46	1.0693	0.846598		982.27	627.588	1002.13	0.98018	0.626252		1066.12	390.016	1024.14	1.04099	0.380822
1017.46						1002.13						1024.14
WT_CA3-sr+slm	KO_CA3-sr+slm		WT_CA3-sr+slm	KO_CA3-sr+slm		WT_CA3-sp	KO_CA3-sp		WT_CA3-sp	KO_CA3-sp		WT_CA3-so	KO_CA3-so		WT_CA3-so	KO_CA3-so
849.607	822.919	997.136	0.852048	0.825283		849.607	681.901	997.136	0.852048	0.68386		955.889	607.994	991.682	0.963907	0.613094
1149.41	800.904	997.136	1.15271	0.803205		1149.41	800.904	997.136	1.15271	0.803205		1140.09	677.703	991.682	1.14965	0.683387
1063.38	750.837	997.136	1.06644	0.752993		1063.38	750.837	997.136	1.06644	0.752993		948.832	728.423	991.682	0.956791	0.734533
974.144	681.672	997.136	0.976942	0.68363		974.144	681.672	997.136	0.976942	0.68363		845.486	784.171	991.682	0.852578	0.790749
1044.63	520.521	997.136	1.04763	0.522017		1044.63	520.521	997.136	1.04763	0.522017		1179.38	719.74	991.682	1.18927	0.725778
901.64	692.573	997.136	0.90423	0.694563		901.64	692.573	997.136	0.90423	0.694563		880.413	706.542	991.682	0.887798	0.712469
997.136						997.136						991.682
WT_DG-sr+slm	KO_DG-sr+slm		WT_DG-sr+slm	KO_DG-sr+slm		WT_DG-sp	KO_DG-sp		WT_DG-sp	KO_DG-sp
1158.9	927.399	1001.4	1.15728	0.926103		997.036	789.68	1033.17	0.96503	0.76433
833.844	793.861	1001.4	0.832679	0.792752		1002.96	558.913	1033.17	0.970768	0.540972
1077.45	806.285	1001.4	1.07594	0.805159		1068.55	712.565	1033.17	1.03425	0.689691
953.85	621.661	1001.4	0.952517	0.620792		1050.82	805.382	1033.17	1.01709	0.779529
968.703	680.967	1001.4	0.96735	0.680015		1047.17	747.784	1033.17	1.01355	0.72378
1015.65	870.688	1001.4	1.01423	0.869472		1001.48	775.985	1033.17	0.969333	0.751075
1001.4						1028
						1033.17
