# Supplementary material for: Endophilin A1 facilitates organization of the GABAergic postsynaptic machinery to maintain excitation-inhibition balance
Source: eLife. 2025 Oct 2;13:RP102792. doi: 10.7554/eLife.102792 (PMC12490859; doi:10.7554/eLife.102792)
Supplement: Figure 2—figure supplement 2—source data 1. [file elife-102792-fig2-figsupp2-data1.xlsx]

## Sheet: Fig 2-s2B
	GFP+mRuby2.GPN	Cre+mRuby2.GPN	Average	GFP+mRuby2.GPN	Cre+mRuby2.GPN			GFP+mRuby2.GPN	Cre+mRuby2.GPN	Average	GFP+mRuby2.GPN	Cre+mRuby2.GPN			GFP+mRuby2.GPN	Cre+mRuby2.GPN	Average	GFP+mRuby2.GPN	Cre+mRuby2.GPN
	375.142	229.836	393.014	0.954525	0.584803			348.257	565.167	569.786	0.611206	0.991893			347.392	202.373	328.369	1.05793	0.616298
	359.174	361.621	393.014	0.913895	0.920122			812.463	444.222	569.786	1.42591	0.779629			306.579	203.167	328.369	0.933643	0.618716
	253.415	318.941	393.014	0.644798	0.811525			800.603	342.951	569.786	1.40509	0.601894			600.405	208.17	328.369	1.82845	0.633952
	372.509	227.228	393.014	0.947825	0.578167			476.202	457.066	569.786	0.835756	0.802171			242.691	259.492	328.369	0.739081	0.790246
	653.927	396.762	393.014	1.66388	1.00954			640.639	422.022	569.786	1.12435	0.740667			235.167	220.598	328.369	0.716168	0.6718
	517.277	223.722	393.014	1.31618	0.569246			595.605	494.984	569.786	1.04531	0.868719			339.318	331.089	328.369	1.03334	1.00828
	285.292	397.032	393.014	0.725907	1.01022			505.529	453.13	569.786	0.887226	0.795263			326.628	363.437	328.369	0.994699	1.1068
	252.314	370.543	393.014	0.641997	0.942823			539.271	567.994	569.786	0.946444	0.996855			309.956	322.098	328.369	0.943927	0.980904
	430.205	281.515	393.014	1.09463	0.716297			559.842	335.303	569.786	0.982547	0.588472			418.396	322.098	328.369	1.27417	0.980904
	214.788	332.829	393.014	0.546514	0.846862			509.781	345.381	569.786	0.894688	0.606159			350.306	265.196	328.369	1.06681	0.807617
	529.115	319.17	393.014	1.3463	0.812108			527.991	531.78	569.786	0.926648	0.933297			269.767	261.871	328.369	0.821537	0.797491
	245.538	232.443	393.014	0.624756	0.591436			451.048	385.558	569.786	0.791609	0.676671			261.561	297.211	328.369	0.796547	0.905114
	373.803	442.38	393.014	0.951118	1.12561			684.781	338.738	569.786	1.20182	0.5945			280.483	299.531	328.369	0.854171	0.912179
	368.097	267.786	393.014	0.936599	0.681364			943.811	415.371	569.786	1.65643	0.728994			303.534	280.948	328.369	0.92437	0.855587
	395.06	362.931	393.014	1.0052	0.923455			777.518	437.049	569.786	1.36458	0.76704			323.411	266.926	328.369	0.984902	0.812885
	359.72	372.413	393.014	0.915285	0.947581			509.338		569.786	0.893911				384.446	285.866	328.369	1.17078	0.870564
	526.315	321.186	393.014	1.33917	0.817237			416.277		569.786	0.730585				353.303	252.468	328.369	1.07593	0.768855
	407.637	283.711	393.014	1.03721	0.721885			651.494		569.786	1.1434				295.178	268.766	328.369	0.898923	0.818489
	413.236	296.672	393.014	1.05145	0.754863			604.869		569.786	1.06157				295.178	271.042	328.369	0.898923	0.82542
	312.584	225.464	393.014	0.79535	0.573679			349.204		569.786	0.612868				326.636	257.037	328.369	0.994723	0.78277
	608.154		393.014	1.54741				506.207		569.786	0.888416				314.475	261.86	328.369	0.957689	0.797457
Average	393.014							490.831		569.786	0.86143				343.656	337.223	328.369	1.04656	1.02696
								403.522		569.786	0.708199				339.582	323.508	328.369	1.03415	0.985198
							Average	569.786							339.582	295.83	328.369	1.03415	0.900908
															286.689	314.929	328.369	0.873071	0.959071
															307.348	233.623	328.369	0.935985	0.711466
															304.566	233.623	328.369	0.927512	0.711466
															299.027		328.369	0.910644
															363.249		328.369	1.10622
															340.891		328.369	1.03814
															370.028		328.369	1.12687
														Average	328.369

## Sheet: Fig 2-s2D
mCherry+PSD.FRs	Cre+PSD.FRs		mCherry+PSD.FRs	Cre+PSD.FRs
899.153	257.462	478.016	1.88101	0.538605
444.76	453.949	478.016	0.930429	0.949652
393.62	583.878	478.016	0.823445	1.22146
530.482	291.124	478.016	1.10976	0.609025
445.769	358.226	478.016	0.93254	0.749401
472.267	428.207	478.016	0.987973	0.8958
498.156	394.677	478.016	1.04213	0.825656
700.195	318.401	478.016	1.46479	0.666088
477.448	262.363	478.016	0.998811	0.548858
664.045	443.447	478.016	1.38917	0.927682
638.055	465.951	478.016	1.3348	0.97476
864.073	322.922	478.016	1.80762	0.675546
428.442	467.381	478.016	0.896292	0.977752
610.479	207.501	478.016	1.27711	0.434088
267.326	265.615	478.016	0.559241	0.555661
529.391	270.659	478.016	1.10748	0.566213
528.427	349.566	478.016	1.10546	0.731285
511.274	343.268	478.016	1.06957	0.71811
348.469	494.716	478.016	0.72899	1.03494
256.172	574.936	478.016	0.535907	1.20275
439.92	444.342	478.016	0.920304	0.929554
450.879	414.906	478.016	0.94323	0.867975
305.039	466.75	478.016	0.638135	0.976431
259.279	287.426	478.016	0.542406	0.601289
204.684	387.713	478.016	0.428195	0.811088
320.673	270.146	478.016	0.670841	0.56514
399.21	347.788	478.016	0.835139	0.727565
475.89	280.96	478.016	0.995552	0.587763
443.896	260.322	478.016	0.928621	0.544588
325.847	253.478	478.016	0.681665	0.530271
330.981	270.454	478.016	0.692405	0.565784
697.13	308.341	478.016	1.45838	0.645043
263.247	264.237	478.016	0.550707	0.552778
813.361	389.522	478.016	1.70153	0.814872
366.674	472.047	478.016	0.767075	0.987513
603.868	459.538	478.016	1.26328	0.961344
	308.983	478.016	1	0.646386
478.016
