# Supplementary material for: Endophilin A1 facilitates organization of the GABAergic postsynaptic machinery to maintain excitation-inhibition balance
Source: eLife. 2025 Oct 2;13:RP102792. doi: 10.7554/eLife.102792 (PMC12490859; doi:10.7554/eLife.102792)
Supplement: Figure 2—source data 1. [file elife-102792-fig2-data1.xlsx]

## Sheet: Figure 2C CA1_intensity-P21
	Brain_N1			Brain_N2			Brain_N3			Brain_N4			Brain_N5			Brain_N6
	WT_CA1_intensity	KO_CA1_intensity		WT_CA1_intensity	KO_CA1_intensity		WT_CA1_intensity	KO_CA1_intensity		WT_CA1_intensity	KO_CA1_intensity		WT_CA1_intensity	KO_CA1_intensity		WT_CA1_intensity	KO_CA1_intensity
	674.911	534.145		633.83	591.484		491.437	410.299		516.94	462.714		360.969	251.589		531.458	396.315
	535.719	437.893		614.658	623.014		479.184	387.982		554.134	337.397		330.896	316.591		497.385	401.346
	481.398	418.231		508.136	505.851		423.005	425.011		575.665	457.037		353.172	336.326		491.387	325.171
	550.467	485.493		505.754	457.147		418.828	267.031		526.827	430.262		393.274	349.079		505.138	367.881
	503.872	430.906		475.14	267.546		516.457	373.125		612.789	469.8		368.064	374.683		519.66	387.255
	703.783	536.826		529.858	551.885		474.859	409.951		562.607	441.277		369.927	309.524		622.841	362.519
	592.377	523.477		577.373	441.391		487.663	287.957		593.786	413.259		365.091	301.848		483.87	471.92
Average	577.504	609.589		457.492	400.757		452.699	258.151		682.904	365.949		640.972	356.985		442.869	508.202
		497.07		539.038	379.585		500.507	464.249		618.801	411.183		596.16	388.575		368.492	376.551
				458.313	468.74		410.599	298.284		485.867	423.533		730.466	382.176		452.041	382.191
				476.973		Average	465.524	513.73		471.009	509.79		399.481	336.738		451.835	522.521
			Average	525.142				233.939		515.641	543.033	Average	446.225			515.604	482.384
								360.809		492.722	432.568					466.44	362.068
										464.829	290.604					460.309	411.256
										382.713	304.291					431.002
									Average	537.149	419.513					487.538
																471.665
																563.013
																566.819
	WT_CA1_intensity	KO_CA1_intensity	average	WT_CA1_intensity	KO_CA1_intensity											506.043
N1	577.504	497.07	508.886	1.13484	0.976781											687.912
N2	525.142	468.74	508.886	1.03195	0.921111											515.638
N3	465.524	360.809	508.886	0.91479	0.709018										Average	501.771
N4	537.149	419.513	508.886	1.05554	0.824376
N5	446.225	336.738	508.886	0.876866	0.661715
N6	501.771	411.256	508.886	0.986019	0.808149
Average	508.886

## Sheet: CA2_intensity-P21
	Brain_N1			Brain_N2			Brain_N3			Brain_N4			Brain_N5			Brain_N6
	WT_CA2_intensity	KO_CA2_intensity		WT_CA2_intensity	KO_CA2_intensity		WT_CA2_intensity	KO_CA2_intensity		WT_CA2_intensity	KO_CA2_intensity		WT_CA2_intensity	KO_CA2_intensity		WT_CA2_intensity	KO_CA2_intensity
	587.446	554.644		525.449	204.377			429.301		663.41	353.139		471.96	363.008		415.656	531.161
	568.119	520.034		503.271	353.093		322.134	389.191		518.835	333.536		435.338	336.738		436.924	380.744
	465.566	377.587		437.495	348.028		359.858	258.801		517.516	371.092		412.642	308.923		437.134	383.108
	476.324	340.509		541.043	374.74		346.339	283.373		506.332	351.934		508.753	472.192		464.197	586.441
	524.364	380.812		514.547	377.084		556.461	315.366		543.992	346.823		421.924	446.241		471.427	408.761
Average	524.364	434.717		511.866	376.27	Average	396.198	335.206	Average	550.017	351.305		425.033	383.979		552.919	399.248
			Average	505.612	338.932							Average	445.942	385.18		549.494	448.244
																545.113
																549.368
																705.054
																726.521
	WT_CA2_intensity	KO_CA2_intensity	average	WT_CA2_intensity	KO_CA2_intensity											704.982
N1	524.364	434.717	494.558	1.06027	0.879003											528.982
N2	505.612	338.932	494.558	1.02235	0.685324										Average	545.213
N3	396.198	335.206	494.558	0.801116	0.67779
N4	550.017	351.305	494.558	1.11214	0.710342
N5	445.942	385.18	494.558	0.901698	0.778838
N6	545.213	448.244	494.558	1.10243	0.906353
Average	494.558

## Sheet: CA3_intensity-P21
	Brain_N1			Brain_N2			Brain_N3			Brain_N4			Brain_N5			Brain_N6
	WT_CA3_intensity	KO_CA3_intensity		WT_CA3_intensity	KO_CA3_intensity		WT_CA3_intensity	KO_CA3_intensity		WT_CA3_intensity	KO_CA3_intensity		WT_CA3_intensity	KO_CA3_intensity		WT_CA3_intensity	KO_CA3_intensity
	600.432	615.706		474.873	297.956		463.156	218.954		305.082	438.256		728.39	348.524		557.005	387.788
	568.428	487.727		473.243	336.647		407.377	435.841		336.149	436.89		619.403	316.575		515.285	388.187
	653.493	531.359		550.971	377.187		417.875	482.806		538.752	411.01		595.674	465.742		532.157	379.026
	611.476	317.612		517.258	355.981		1472.23	328.041		454.877	407.738		513.62	444.557		508.467	564.517
	474.849	452.761		448.536	208.111		481.106	450.05		443.165	385.132		501.158	502.83		517.116	469.42
	474.873	523.44		492.976	315.176		648.349	383.138		758.74	383.536		398.022	383.206		615.405	675.72
Average	563.925	488.101								472.794	410.427		559.378	410.239		605.04	616.173
																693.187	582.596
																678.532	538.438
																693.161	566.048
																682.675	516.791
																847.644
																873.722
																646.866
																640.447
	WT_CA3_intensity	KO_CA3_intensity	average	WT_CA3_intensity	KO_CA3_intensity
N1	563.925	488.101	562.978	1.00168	0.866998
N2	492.976	315.176	562.978	0.875657	0.559837
N3	648.349	383.138	562.978	1.15164	0.680556
N4	472.794	410.427	562.978	0.839809	0.729028
N5	559.378	410.239	562.978	0.993605	0.728694
N6	640.447	516.791	562.978	1.13761	0.91796
average	562.978

## Sheet: DG_intensity-P21
	Brain_N1			Brain_N2			Brain_N3			Brain_N4			Brain_N5			Brain_N6
	WT_DG_intensity	KO_DG_intensity		WT_DG_intensity	KO_DG_intensity		WT_DG_intensity	KO_DG_intensity		WT_DG_intensity	KO_DG_intensity		WT_DG_intensity	KO_DG_intensity		WT_DG_intensity	KO_DG_intensity
	353.748	450.306		405.969	414.316		404.22	306.929		270.723	334.541		506.614	424.642		374.186	275.166
	477.373	410.945		515.15	375.294		437.888	452.248		227.142	358.042		278.95	272.85		368.843	431.739
	394.637	460.223		442.744	571.728		610.267	407.06		506.262	373.591		389.293	294.657		473.47	529.37
	505.236	426.189		445.103	271.511		368.932	307.01		345.456	409.691		333.141	278.39		355.521	417.266
	434.704	474.478	Average	452.241	408.212	Average	455.327	368.312	Average	337.396	368.966	Average	377	317.635		336.667	447.103
Average	433.14	444.428														377.297	384.931
																307.918	414.263
																333.352
																397.077
																287.998
	WT_DG_intensity	KO_DG_intensity	Average	WT_DG_intensity	KO_DG_intensity											327.587
N1	433.14	444.428	409.149	1.05864	1.08623											356.088
N2	452.241	408.212	409.149	1.10532	0.997711											397.737
N3	455.327	368.312	409.149	1.11286	0.90019											370.524
N4	337.396	368.966	409.149	0.824629	0.901789											495.764
N5	377	317.635	409.149	0.921424	0.776331											586.194
N6	399.789	414.263	409.149	0.977125	1.0125											566.618
Average	409.149															483.367
															Average	399.789

## Sheet: CA1_intensity-P60
	Brain_N1			Brain_N2			Brain_N3			Brain_N4			Brain_N5			Brain_N6
	WT_CA1_sr+slm	KO_CA1_sr+slm		WT_CA1_sr+slm	KO_CA1_sr+slm		WT_CA1_sr+slm	KO_CA1_sr+slm		WT_CA1_sr+slm	KO_CA1_sr+slm		WT_CA1_sr+slm	KO_CA1_sr+slm		WT_CA1_sr+slm	KO_CA1_sr+slm
	919.815	1021.06		999.736	636.558		1045.32	494.22		1322.64	573.288		1075.96	1037.75		934.153	755.502
	911.434	966.514		1179.28	848.244		1037.72	622.884		704.545	603.685		1144.47	872.223		997.861	1043.97
	831.402	780.516		1307.83	869.464		1085.5	634.178		1110.34	521.964		994.531	944.376		1009.63	911.956
	889.463	879.466		1209.63	554.271		928.165	510.548		822.379	523.763		916.169	1023.4		899.655	777.959
	901.439	999.761		1206.28	1010.75		1024.18	510.018		989.976	549.149		1032.78	1268.08		960.325	872.346
	1202.78	804.674		786.377	783.857			554.37			554.37			1029.17
	942.723	819.47		1114.85
		895.923
	WT_CA1_sp	KO_CA1_sp		WT_CA1_sp	KO_CA1_sp		WT_CA1_sp	KO_CA1_sp		WT_CA1_sp	KO_CA1_sp		WT_CA1_sp	KO_CA1_sp		WT_CA1_sp	KO_CA1_sp
	862.59	974.581		1100.36	651.978		790.41	607.489		799.356	662.687		999.426	947.859		1062.96	561.972
	897.646	1034.65		856.895	543.676		1063.56	510.082		1346.67	628.048		932.93	1344.02		875.684	385.888			942.723	895.923
	805.903	1001.62		1034.81	967.913		1070.59	495.215		1108.32	637.858		1165.37	998.023		942.797	1279.67			1114.85	783.857
	728.823	1103.7		1112.68	890.096		783.386	535.985		1037.7	599.207		1007.62	1092.66		945.446	875.842			1024.18	554.37
	1105.02	823.276		1365.17	735.943		926.987	488.967		1073.01	899.097		1026.34	1095.64		1067.76	775.842			989.976	554.37
	1388.23	1079.36		856.584	911.453			527.548			685.379					978.93				1032.78	1029.17
	964.701	575.177		1054.42	637.617															960.325	872.346
		941.765			1090.6
					964.043
					821.48
	WT_CA1-so	KO_CA1-so		WT_CA1-so	KO_CA1-so		WT_CA1-so	KO_CA1-so		WT_CA1-so	KO_CA1-so		WT_CA1-so	KO_CA1-so		WT_CA1-so	KO_CA1-so
	837.824	774.663		1438.42	943.581		1405.4	494.31		507.305	523.982		1066.51	924.332		922.169	610.724
	827.625	1030.37		816.49	555.085		994.804	659.708		965.122	542.684		1086.09	970.043		1058.3	1272.2
	1262.3	867.879		1128.68	678.087		1027.37	552.986		882.746	576.116		922.169	1084.61		866.935	901.617
	1059.84	943.581		1116.69	865.821		1275.86	601.033		1111.22	428.434		1022.45	1168.52		1027.36	981.304
	976.883	994.071		1064.45	740.498		1175.86	577.009		866.599	548.696		1027.39	1036.87		870.905	941.461
	907.633	808.553		1202.45	756.615						523.982		1024.92			949.134
	959.318	909.744		1127.86
	975.917	904.123
	WT_CA1_sr+slm	WT_CA1_sp	WT_CA1-so	WT_CA1_AVE		KO_CA1_sr+slm	KO_CA1_sp	KO_CA1-so	KO_CA1_AVE
N1	942.723	964.701	975.917	961.114		895.923	941.765	904.123	913.937
N2	1114.85	1054.42	1127.86	1099.05		783.857	821.48	756.615	787.317
N3	1024.18	926.987	1175.86	1042.34		554.37	527.548	577.009	552.975
N4	989.976	1073.01	866.599	976.529		554.37	685.379	523.982	587.911
N5	1032.78	1026.34	1024.92	1028.01		1029.17	1095.64	1036.87	1053.89
N6	960.325	978.93	949.134	962.796		872.346	775.842	941.461	863.216
	WT_CA1_AVE	KO_CA1_AVE		WT_CA1_AVE	KO_CA1_AVE
N1	961.114	913.937	1011.64	0.950055	0.903421
N2	1099.05	787.317	1011.64	1.0864	0.778258
N3	1042.34	552.975	1011.64	1.03035	0.546613
N4	976.529	587.911	1011.64	0.965293	0.581146
N5	1028.01	1053.89	1011.64	1.01619	1.04177
N6	962.796	863.216	1011.64	0.951718	0.853284
	1011.64

## Sheet: CA2_intensity-P60
	Brain_N1			Brain_N2			Brain_N3			Brain_N4			Brain_N5			Brain_N6
	WT_CA2-sr+slm	KO_CA2-sr+slm		WT_CA2-sr+slm	KO_CA2-sr+slm		WT_CA2-sr+slm	KO_CA2-sr+slm		WT_CA2-sr+slm	KO_CA2-sr+slm		WT_CA2-sr+slm	KO_CA2-sr+slm		WT_CA2-sr+slm	KO_CA2-sr+slm
	906.274	961.115		1054.96	961.785		1027.84	648.092		892.274	861.378		964.659	781.29		1057.31	929.158
	921.241	779.906		1123.25	593.446		1030.46	800.331		1024.64	773.046		1087.97	835.642		1100.07	858.835
	907.265	889.674		961.304	801.927		1080.33	846.057		1068.88	902.262		1070.23	775.758		901.104	816.231
	881.32	912.93		1036.91	774.616		1032.91	814.704		919.777	832.567		982.394	856.917		1293.38	812.394
	952.688	808.927		1269.09	756.304		974.206	511.874		886.726	716.806		1026.31	812.402		1087.97	890.27
	913.758	870.511		1089.1	777.616		1029.15	724.212		958.459	817.212						861.378
	WT_CA2-sp	KO_CA2-sp		WT_CA2-sp	KO_CA2-sp		WT_CA2-sp	KO_CA2-sp		WT_CA2-sp	KO_CA2-sp		WT_CA2-sp	KO_CA2-sp		WT_CA2-sp	KO_CA2-sp
	802.289	916.321		1003.33	781.515		918.143	556.931		923.411	999.578		1017.7	905.559		1030.6	705.643
	805.174	698.124		1134.32	727.638		956.342	664.237		1016.31	849.773		1175.58	863.61		808.253	644.456
	873.996	792.805		1106.38	647.08		1047.03	1036.02		823.483	923.408		1114.43	1091.57		1046.22	606.11
	859.502	731.922		1068.2	729.266		1163.47	752.396		921.068	1104.24		1149.22	707.359		1044.01	554.142
	1010.37	896.94		1289.52	887.649		784.204	752.396		921.068	969.25		1021.78	1053.17		982.27	627.588
	870.266	807.222		1120.35	754.311		973.839						1391.32	924.253
					754.576								1145.01
	WT_CA2-so	KO_CA2-so		WT_CA2-so	KO_CA2-so		WT_CA2-so	KO_CA2-so		WT_CA2-so	KO_CA2-so		WT_CA2-so	KO_CA2-so		WT_CA2-so	KO_CA2-so
	808.046	916.516		905.366	1016.36		1349.09	641.311		1001.94	872.539		1012.45	903.324		1101.89	452.22
	1112.25	794.198		982.705	695.264		1011.37	958.921		908.125	946.682		1109.29	581.047		1164.33	472.463
	971.511	831.791		861.372	938.138		1128.13	817.62		915.084	824.508		1058.86	690.575		1176.45	353.776
	874.615	957.052		901.762	757.365		1059.04	875.882		916.503	888.865		1027.81	603.259		1111.55	239.352
	810.766	776.232		1068.97	913.955		1353.53	706.846		1033.51	1015.46		985.108	455.146		776.378	432.269
	1183.7	855.158		944.035	813.798		1180.23	800.116		955.031	909.61		1042.18	646.67		1066.12	390.016
	960.147				855.814								1039.28
	WT_CA2-sr+slm	WT_CA2-sp	WT_CA2-so	WT_CA2_AVE
N1	913.758	870.266	960.147	914.723
N2	1089.1	1120.35	944.035	1051.16
N3	1029.15	973.839	1180.23	1061.07
N4	958.459	921.068	955.031	944.853
N5	1026.31	1145.01	1039.28	1070.2
N6	1087.97	982.27	1066.12	1045.45
	KO_CA2-sr+slm	KO_CA2-sp	KO_CA2-so	KO_CA2_AVE
N1	870.511	807.222	855.158	844.297
N2	777.616	754.576	855.814	796.002
N3	724.212	752.396	800.116	758.908
N4	817.212	969.25	909.61	898.691
N5	812.402	924.253	646.67	794.442
N6	861.378	627.588	390.016	626.327
	WT_CA2_AVE	KO_CA2_AVE		WT_CA2_AVE	KO_CA2_AVE
N1	914.723	844.297	1014.58	0.901581	0.832166
N2	1051.16	796.002	1015.58	1.03504	0.783793
N3	1061.07	758.908	1016.58	1.04377	0.746532
N4	944.853	898.691	1017.58	0.928532	0.883167
N5	1070.2	794.442	1018.58	1.05068	0.779952
N6	1045.45	626.327	1019.58	1.02538	0.614301
	1014.58

## Sheet: CA3_intensity-P60
	Brain_N1			Brain_N2			Brain_N3			Brain_N4			Brain_N5			Brain_N6
	WT_CA3_intensity	KO_CA3_intensity		WT_CA3_intensity	KO_CA3_intensity		WT_CA3_intensity	KO_CA3_intensity		WT_CA3_intensity	KO_CA3_intensity		WT_CA3_intensity	KO_CA3_intensity		WT_CA3_intensity	KO_CA3_intensity
	864.215	1028.03		1162.08	616.715		1023.47	656.819		1016.05	768.924		1053.34	422.196		839.376	791.756
	1036.35	886.186		982.867	965.338		1231.56	1001.49		1237.07	448.165		1012.12	571.36		800.814	850.011
	775.754	774.953		998.621	568.236		1046.35	678.063		928.583	745.323		1064.27	568.1		894.484	687.767
	799.078	743.522		1043.77	762.991		1183.96	610.283		921.587	719.968		1044.74	554.028		941.903	565.345
	772.64	681.901		1559.71	866.197		1014.57	807.526		767.427	725.977		1048.67	486.924		1031.62	567.989
	849.607	822.919		1149.41	1025.95		880.394	750.837		974.144	681.672		1044.63	520.521		901.64	692.573
					800.904		1063.38
	WT_CA3-sp	KO_CA3-sp		WT_CA3-sp	KO_CA3-sp		WT_CA3-sp	KO_CA3-sp		WT_CA3-sp	KO_CA3-sp		WT_CA3-sp	KO_CA3-sp		WT_CA3-sp	KO_CA3-sp
	811.972	609.585		1095.73	893.952		1140.25	791.8		1046.72	675.816		1052.11	614.114		1022.78	667.231
	887.242	754.217		1203.09	707.856		986.517	709.873		953.283	754.808		1059.34	492.244		1095.92	642.193
	791.698	668.465		1184.93	870.687		1061.54	520.521		922.431	661.192		1056.28	548.205		810.838	753.184
	811.668	789.988		1154.32	675.032		1058.76	816.104		922.553	609.99		1091.27	505.948		794.733	689.2
	945.456	587.251		1108.98	856.994		1080.55	915.884		1025.73	706.552		964.143	442.096		856.201	711.06
	849.607	681.901		1149.41	800.904		1052.68	750.837		974.144	681.672		1044.63	520.521		829.375	692.573
							1063.38									901.64
	WT_CA3-so	KO_CA3-so		WT_CA3-so	KO_CA3-so		WT_CA3-so	KO_CA3-so		WT_CA3-so	KO_CA3-so		WT_CA3-so	KO_CA3-so		WT_CA3-so	KO_CA3-so
	897.222	629.631		1213.66	742.858		996.838	784.171		790.145	761.548		1041.34	700.331		939.39	727.038
	837.026	586.357		1066.52	713.989		900.826	719.74		1209.85	813.329		1317.42	702.021		833.203	765.232
	1074.75	769.049		1047.12	671.624		910.023	739.516		857.863	773.671		1049.13	720.746		868.647	730.752
	975.739	603.32		1040.28	703.216		978.502	747.855		847.121	744.188		1134.13	755.862		889.428	657.597
	994.707	451.614		1332.86	556.827		957.972	650.834		522.446	828.119		1354.88	719.74		871.399	652.092
	955.889	607.994		1140.09	677.703		948.832	728.423		845.486	784.171		1179.38			880.413	706.542
	WT_CA3-sr+slm	WT_CA3-sp	WT_CA3-so	WT_CA3_AVE
N1	849.607	849.607	955.889	885.035
N2	1149.41	1149.41	1140.09	1146.3
N3	1063.38	1063.38	948.832	1025.2
N4	974.144	974.144	845.486	931.258
N5	1044.63	1044.63	1179.38	1089.55
N6	901.64	901.64	880.413	894.564
	KO_CA3-sr+slm	KO_CA3-sp	KO_CA3-so	KO_CA3_AVE
N1	822.919	681.901	607.994	704.272
N2	800.904	800.904	677.703	759.837
N3	750.837	750.837	728.423	743.366
N4	681.672	681.672	784.171	715.838
N5	520.521	520.521	719.74	586.928
N6	692.573	692.573	706.542	697.23
	WT_CA3_AVE	KO_CA3_AVE		WT_CA3_AVE	KO_CA3_AVE
N1	885.035	704.272	995.318	0.889198	0.707585
N2	1146.3	759.837	995.318	1.1517	0.763412
N3	1025.2	743.366	995.318	1.03002	0.746863
N4	931.258	715.838	995.318	0.935639	0.719206
N5	1089.55	586.928	995.318	1.09467	0.589689
N6	894.564	697.23	995.318	0.898773	0.70051
	995.318

## Sheet: DG_intensity-P60
	Brain_N1			Brain_N2			Brain_N3			Brain_N4			Brain_N5			Brain_N6
	WT_DG-sr+slm	KO_DG-sr+slm		WT_DG-sr+slm	KO_DG-sr+slm		WT_DG-sr+slm	KO_DG-sr+slm		WT_DG-sr+slm	KO_DG-sr+slm		WT_DG-sr+slm	KO_DG-sr+slm		WT_DG-sr+slm	KO_DG-sr+slm
	1168.02	938.464		833.844	614.622		896.532	883.689		845.106	651.277		1024.54	431.842		1107.33	910.101
	1149.79	916.333		848.353	883.271		1258.36	728.88		1062.59	592.044		912.866	930.091		1056.21	831.275
	1102.65	1033.09		929.335	817.472		1002.74	802.382		830.541	622.717		914.656	673.848		950.65	842.612
	1167.57	1069.36		877.874	809.178		1292.38	846.395		926.457	700.606		1002.26	682.035		1019.99	898.765
	1180.05	892.493		893.125	852.332		1133.48	812.562		944.661	615.873		989.189	699.957		944.057	870.688
	1085.31	930.799		805.233	856.776		1048.68	763.803		1113.74	547.447		968.703	668.026		1015.65
	1258.92	711.256		649.141	723.376		909.965	806.285		953.85	621.661			680.967
	1158.9	927.399		833.844	793.861		1077.45
	WT_DG-sr+slm	KO_DG-sr+slm		WT_DG-sr+slm	KO_DG-sr+slm		WT_DG-sr+slm	KO_DG-sr+slm		WT_DG-sr+slm	KO_DG-sr+slm		WT_DG-sr+slm	KO_DG-sr+slm		WT_DG-sr+slm	KO_DG-sr+slm
	995.439	869.36		800.264	407.827		811.336	715.187		1095.31	707.941		1028.31	748.245		1022.72	859.334
	998.633	710		1205.66	709.943		1188.66	902.824		1006.34	747.324		1022.34	698.352		1014.27	748.126
	991.168	909.343		1002.33	553.176		1071.53	689.737		1040.94	806.342		1043.94	809.544		995.165	703.417
	977.023	689.241		959.831	564.102		1161.22	771.706		1049.64	791.046		1095.81	703.737		973.244	793.062
	942.337	803.322		932.183	662.202		974.322	678.328		1021.23	944.822		1045.43	805.367		1002.01	775.985
	1033.19	731.241		927.937	502.825		1090.47	517.606		1091.48	834.82		1047.17	721.461		1001.48
	1041.46	815.253		1192.54	512.319		1182.34	712.565		1050.82	805.382			747.784
	997.036	789.68		1002.96	558.913		1068.55
	WT_DG-sr+slm	KO_DG-sr+slm	Average	WT_DG-sr+slm	KO_DG-sr+slm
N1	1158.9	927.399	1001.4	1.15728	0.926103
N2	833.844	793.861	1001.4	0.832679	0.792752
N3	1077.45	806.285	1001.4	1.07594	0.805159
N4	953.85	621.661	1001.4	0.952517	0.620792
N5	968.703	680.967	1001.4	0.96735	0.680015
N6	1015.65	870.688	1001.4	1.01423	0.869472
	1001.4
	WT_DG-sp	KO_DG-sp	Average	WT_DG-sp	KO_DG-sp
N1	997.036	789.68	1028	0.969875	0.768168
N2	1002.96	558.913	1028	0.975642	0.543688
N3	1068.55	712.565	1028	1.03945	0.693153
N4	1050.82	805.382	1028	1.0222	0.783443
N5	1047.17	747.784	1028	1.01864	0.727414
N6	1001.48	775.985	1028	0.9742	0.754846
Average	1028
