# Supplementary material for: Endophilin A1 facilitates organization of the GABAergic postsynaptic machinery to maintain excitation-inhibition balance
Source: eLife. 2025 Oct 2;13:RP102792. doi: 10.7554/eLife.102792 (PMC12490859; doi:10.7554/eLife.102792)
Supplement: Figure 2—source data 2. [file elife-102792-fig2-data2.xlsx]

## Sheet: Figure 2F CA1_intensity-P21
	Brain_N1			Brain_N2			Brain_N3			Brain_N4			Brain_N5			Brain_N6
	WT_CA1_intensity	KO_CA1_intensity		WT_CA1_intensity	KO_CA1_intensity		WT_CA1_intensity	KO_CA1_intensity		WT_CA1_intensity	KO_CA1_intensity		WT_CA1_intensity	KO_CA1_intensity		WT_CA1_intensity	KO_CA1_intensity
	1215.97	1799.78		1621.54	1522.24		2190.67	1458.28		2039.85	904.485		1243.26	1166.15		1813.9	1878.4
	1874.71	1663.67		1768.42	1376.36		2661.82	1511.59		2009.77	1096.92		1238.67	1104.27		1913.38	1861.5
	1390.1	1602.67		2177.16	1354.26		2637.23	1292.66		2050.02	1106.65		1442.36	1625.83		1730.07	1726.05
	1785.9	1659.35		1819.56	1536.7		2180.56	1358.64		2206.38	1014.58		1314.73	1209.82		1791.19	1431.26
	1827.75	1608.94		1828.11	1577.1		1922.96	1204.4		2277.13	1084.42		1301.46	1387.67		1596.12	1724.3
	1816.03	1580.49		2180.41	1477.84		1881.64	1201.68		2153.16	1137.06		1308.09	1298.75		1701.48
	1531.12	1328.8		1899.2	1474.08		1899.91	1079.29		1124	924.657					1757.69
	1634.51	1606.24					2196.4	1300.93		898.449	999.99
										1190.87	1425.36
										1286.27	1220.27
										1263.78	1068.13
										1721.03	1140.34
										1714.48	1034.35
										1557.84	1036.17
										1210.74	1085.24
										1646.92
	WT_CA1_intensity	KO_CA1_intensity	Average	WT_CA1_intensity	KO_CA1_intensity
N1	1634.51	1606.24	1740.47	0.939121	0.922879
N2	1899.2	1474.08	1740.47	1.0912	0.846946
N3	2196.4	1300.93	1740.47	1.26196	0.747463
N4	1646.92	1085.24	1740.47	0.94625	0.623534
N5	1308.09	1298.75	1740.47	0.751576	0.746206
N6	1757.69	1724.3	1740.47	1.0099	0.990712
Average	1740.47

## Sheet: CA2_intensity-P21
	Brain_N1			Brain_N2			Brain_N3			Brain_N4			Brain_N5			Brain_N6
	WT_CA2_intensity	KO_CA2_intensity		WT_CA2_intensity	KO_CA2_intensity		WT_CA2_intensity	KO_CA2_intensity		WT_CA2_intensity	KO_CA2_intensity		WT_CA2_intensity	KO_CA2_intensity		WT_CA2_intensity	KO_CA2_intensity
	1667.31	1872.59		1507.57	1557.58		1427.99	1152.91		1560.03	1181.31		1630.78	1176.51		2035.6	2187.47
	1608.41	1517.96		1714.41	1404.25		2384.47	1036.92		1860.78	1107.31		1643.29	1327.9		2022.27	2390.15
	1641.92	1617.84		1634.84	1403.91		2764.57	1202.98		1555.85	1211.85		1665.75	1531.31		2783.68	2187.56
	1939.15	1708.27		1923.23	1331.45		2556.89	1186.47		2075.91	1209.08		1131.27	1392.38		2181.1	2278.75
	1759.05	1759.71		1695.01	1579.05		2216.47	1003.48		2604.92	1129.74		1174.86	1447.09		2468.89	2408.67
	1669.35	1695.27			1455.25		2076.73	986.725		2221.59	1161.65		1712.89	1196.24		2042.43	2077.76
	1714.2						2251.65	1094.91		1979.85	1166.82		1864.82	1345.24		2255.66	2255.06
							1128.26						1181.72
							1199.48						1174.37
							2000.72						1162.11
													1434.19
	WT_CA2_intensity	KO_CA2_intensity	Average	WT_CA2_intensity	KO_CA2_intensity
N1	1714.2	1695.27	1846.6	0.928297	0.918049
N2	1695.01	1455.25	1846.6	0.917907	0.788066
N3	2000.72	1094.91	1846.6	1.08346	0.592934
N4	1979.85	1166.82	1846.6	1.07216	0.631875
N5	1434.19	1345.24	1846.6	0.776661	0.728493
N6	2255.66	2255.06	1846.6	1.22152	1.22119
Average	1846.6

## Sheet: CA3_intensity-P21
	Brain_N1			Brain_N2			Brain_N3			Brain_N4			Brain_N5			Brain_N6
	WT_CA3_intensity	KO_CA3_intensity		WT_CA3_intensity	KO_CA3_intensity		WT_CA3_intensity	KO_CA3_intensity		WT_CA3_intensity	KO_CA3_intensity		WT_CA3_intensity	KO_CA3_intensity		WT_CA3_intensity	KO_CA3_intensity
	1186.06	2182.52		1556.29	1619.1		2441.74	1386.53		1635.41	1206.68		1720.31	1158.62		1337.23	1524.87
	1397.94	2099.57		1339.18	1554.53		2414.55	1457.95		1183.25	1099.1		1973.91	1030.02		2093.76	1671.09
	1563.54	1505.63		1355.93	1607.23		2473.24	1477.91		997.214	1205.83		1103.19	1408.16		2165.27	1758.2
	1556.29	1894.07		1439.01	1579.06		2160.53	1402.38		944.26	1198.06		1611.03	1207.64		1263.75	2005.97
	1425.96	1964.41		1806.43	1574.15		1933.91	1386.43		1017.12	1054.78		1623.18	1190.22		1259.95	1948.8
		1929.24		2225.9			2284.8	1422.24		1629.11	1152.89		1563.19	1198.93		1976.98	1893.14
				1620.46						1234.39			1599.14			2275.52	1800.34
																1896.22
																2173.51
																1769.97
																1821.22
	WT_CA3_intensity	KO_CA3_intensity	Average	WT_CA3_intensity	KO_CA3_intensity
N1	1425.96	1929.24	1664.33	0.856778	1.15917
N2	1620.46	1574.15	1664.33	0.973642	0.945821
N3	2284.8	1422.24	1664.33	1.37281	0.854543
N4	1234.39	1152.89	1664.33	0.741678	0.692708
N5	1599.14	1198.93	1664.33	0.960831	0.720371
N6	1821.22	1800.34	1664.33	1.09427	1.08173
Average	1664.33

## Sheet: DG_intensity-P21
	Brain_N1			Brain_N2			Brain_N3			Brain_N4			Brain_N5			Brain_N6
	WT_DG_intensity	KO_DG_intensity		WT_DG_intensity	KO_DG_intensity		WT_DG_intensity	KO_DG_intensity		WT_DG_intensity	KO_DG_intensity		WT_DG_intensity	KO_DG_intensity		WT_DG_intensity	KO_DG_intensity
	837.65	896.566		1368.26	919.163		1234.38	987.943		1702.99	1056.36		1219.19	1207.46		1716.39	1347.31
	1154.62	862.999		1076.27	864.095		1644.62	956.028		1727.29	928.094		972.768	1333.3		1413.49	1667.24
	1062.49	1016.63		1278.71	1010.87		1244.34	958.119		1776.37	907.62		1197.28	1207.46		1531.88	1340.82
	1569.09	1044.51		983.425	1003.96		1329.24	861.423		1607.14	967.583		1021.36	1232.85		1370.74	1483.2
	1568.55	944.037		868.369	985.446		1289.6	833.059		1425.24	960.464		1069.29	1370.84		1417.95	1697.8
	1238.48	966.318		1248.75	823.677		1348.44	919.314		1626.42	964.023		1095.98	1270.38		1598.31	1507.28
		955.177		1137.3	934.534					1342.12						1508.13
										1601.08
	WT_DG_intensity	KO_DG_intensity	Average	WT_DG_intensity	KO_DG_intensity
N1	1238.48	955.177	1321.57	0.93713	0.722761
N2	1137.3	934.534	1321.57	0.860567	0.707141
N3	1348.44	919.314	1321.57	1.02033	0.695625
N4	1601.08	964.023	1321.57	1.2115	0.729455
N5	1095.98	1270.38	1321.57	0.829301	0.96127
N6	1508.13	1507.28	1321.57	1.14117	1.14052
Average	1321.57

## Sheet: Figure 2F CA1_intensity-P60
	Brain_N1			Brain_N2			Brain_N3			Brain_N4			Brain_N5			Brain_N6
	WT_CA1_intensity	KO_CA1_intensity		WT_CA1_intensity	KO_CA1_intensity		WT_CA1_intensity	KO_CA1_intensity		WT_CA1_intensity	KO_CA1_intensity		WT_CA1_intensity	KO_CA1_intensity		WT_CA1_intensity	KO_CA1_intensity
	1712.1	1551.63		1039.58	1335.45		932.649	1149.99		2042.24	1723.71		1578.77	1627.23		1341.81	1435.28
	1682.82	1501.57		1038.1	1279.8		912.105	1145.76		1794.55	1699.98		1519.67	1481.53		1176.22	1335.34
	1043.83	1436.58		1010.26	1270.74		820.654	1113.13		1631.54	1670.23		1410.76	1458.27		1203.28	1312.44
	1477.37	1390.68		989.45	1201.05		889.341	1069.11		1892.06	1667.75		1487.04	1436.05		1314.74	1305.28
	1481.79	1358.67		1015.6	1154.11		887.597	1119.5		1753.49	1728.2		1519.1	1670.23	Average	1259.01	1347.08
Average	1479.58	1447.82	Average	1018.6	1248.23	Average	888.469		Average	1822.77	1697.97	Average	1503.07	1534.66
	WT_CA1_intensity	KO_CA1_intensity	Average	WT_CA1_intensity	KO_CA1_intensity
N1	1479.58	1447.82	1328.58	1.11365	1.08975
N2	1018.6	1248.23	1328.58	0.766678	0.93952
N3	888.469	1119.5	1328.58	0.668734	0.842626
N4	1822.77	1697.97	1328.58	1.37197	1.27803
N5	1503.07	1534.66	1328.58	1.13133	1.15511
N6	1259.01	1347.08	1328.58	0.947635	1.01392
Average	1328.58

## Sheet: CA2_intensity-P60
	Brain_N1			Brain_N2			Brain_N3			Brain_N4			Brain_N5			Brain_N6
	WT_CA2_intensity	KO_CA2_intensity		WT_CA2_intensity	KO_CA2_intensity		WT_CA2_intensity	KO_CA2_intensity		WT_CA2_intensity	KO_CA2_intensity		WT_CA2_intensity	KO_CA2_intensity		WT_CA2_intensity	KO_CA2_intensity
	1441.28	1051.41		1050.37	1172.37		1013.01	901.923		2071.25	1832.24		1644.76	1573.68		1402.56	1426.4
	1398.57	887.74		1046.37	1287.78		883.027	992.338		1893.98	1780.55		1585.7	1568.4		1367.26	737.077
	1304.5	1378.72		1044.3	1068.18		991.743	908.574		1934.82	1742.66		1622.83	1480.91		1389.73	1217.45
	1291.05	1179.04		1047.84	1089.64		1002.18	957.832		1999.84	1870.13		1645.39	1532.94		1382.04	872.451
	1048.3	1208.47		1046.18	1271.92		997.473	783.948		2013.18	1806.4		1577.47	1549.05		1382.94	1155.32
Average	1296.74	930.361	Average	1047.01	1177.98		800.681	908.923	Average	1982.61		Average	1615.23	1541	Average	1384.9	1081.74
		1105.96				Average	948.02
	WT_CA2_intensity	KO_CA2_intensity	Average	WT_CA2_intensity	KO_CA2_intensity
N1	1296.74	1105.96	1379.09	0.940289	0.801948
N2	1047.01	1177.98	1379.09	0.759207	0.854172
N3	948.02	908.923	1379.09	0.687426	0.659076
N4	1982.61	1806.4	1379.09	1.43763	1.30985
N5	1615.23	1541	1379.09	1.17123	1.1174
N6	1384.9	1081.74	1379.09	1.00422	0.784388
Average	1379.09

## Sheet: CA3_intensity-P60
	Brain_N1			Brain_N2			Brain_N3			Brain_N4			Brain_N5			Brain_N6
	WT_CA3_intensity	KO_CA3_intensity		WT_CA3_intensity	KO_CA3_intensity		WT_CA3_intensity	KO_CA3_intensity		WT_CA3_intensity	KO_CA3_intensity		WT_CA3_intensity	KO_CA3_intensity		WT_CA3_intensity	KO_CA3_intensity
	1157.91	1148.19		1133.55	1036.17		1117.28	1242.71		1862.28	1969.73		1553.83	1624.91		1352.09	1589.35
	1146.45	1087.7		1132.87	1122.71		1038.95	1101.66		1709.1	1653.47		1358.92	1617.06		1409.85	1572.16
	1198.38	1100.37		1247.22	1088.34		1003.51	1174.26		1684.24	1631.2		1399.9	1708.38		1322.85	1489.2
	1201.85	1077.55		1019.2	1070.54		926.479	1170.11		1777.36	1770.51		1407.77	1621.74		1308.35	1501.27
	1056.32	1175.93	Average	1133.21	1079.44	Average	1021.55	1172.18		1689.64	1679.12		1561.45	1532.83		1312.56	1682.72
Average	1152.18	1117.95								1788.62	1800.2	Average	1456.37	1620.98	Average	1341.14	1566.94
									Average	1751.87	1750.71
	WT_CA3_intensity	KO_CA3_intensity	Average	WT_CA3_intensity	KO_CA3_intensity
N1	1152.18	1117.95	1309.39	0.879938	0.853793
N2	1133.21	1079.44	1309.39	0.865449	0.824387
N3	1021.55	1172.18	1309.39	0.780177	0.895215
N4	1751.87	1750.71	1309.39	1.33793	1.33704
N5	1456.37	1620.98	1309.39	1.11225	1.23797
N6	1341.14	1566.94	1309.39	1.02425	1.1967
Average	1309.39

## Sheet: DG_intensity-P60
	Brain_N1			Brain_N2			Brain_N3			Brain_N4				Brain_N5			Brain_N6
	WT_DG_intensity	KO_DG_intensity		WT_DG_intensity	KO_DG_intensity		WT_DG_intensity	KO_DG_intensity		WT_DG_intensity	KO_DG_intensity			WT_DG_intensity	KO_DG_intensity		WT_DG_intensity	KO_DG_intensity
	1399.38	1448.46		1202.31	1427.41		974.882	1221.02		2152.65	1774.56			1954.39	1732.98		1455.33	1652.09
	1341.54	1427.94		959.229	1269.85		901.266	1055.9		1983.41	1671.82			1900.25	1750.37		1410.31	1390.37
	1399.47	1477.93		1010.72	1307.39		1045.28	914.61		2218.04	1777.28			2001.64	1589.04		1455.33	1555.28
	1290.58	1421.9		1251.64	1267.84		917.362	1066.27		1918.01	1622.94			1897.05	1603.9		1410.32	1487.19
	1421.33	1414.78		979.952	1470.66		881.769	1061.42	Average	2068.03	1769.34			2042.6	1634.76	Average	1432.82	1521.23
Average	1370.46	1438.2	Average	1080.77	1348.63	Average	944.112	1063.85			1723.19		Average	1959.18	1662.21
	WT_DG_intensity	KO_DG_intensity	Average	WT_DG_intensity	KO_DG_intensity
N1	1370.46	1438.2	1475.9	0.928561	0.974462
N2	1080.77	1348.63	1475.9	0.732281	0.913771
N3	944.112	1063.85	1475.9	0.639688	0.720814
N4	2068.03	1723.19	1475.9	1.4012	1.16755
N5	1959.18	1662.21	1475.9	1.32745	1.12624
N6	1432.82	1521.23	1475.9	0.970814	1.03072
Average	1475.9
