# Supplementary material for: Endophilin A1 facilitates organization of the GABAergic postsynaptic machinery to maintain excitation-inhibition balance
Source: eLife. 2025 Oct 2;13:RP102792. doi: 10.7554/eLife.102792 (PMC12490859; doi:10.7554/eLife.102792)
Supplement: Figure 2—source data 3. [file elife-102792-fig2-data3.xlsx]

## Sheet: Fig 2I CA1_intensity-P21
	Brain_N1			Brain_N2			Brain_N3			Brain_N4			Brain_N5			Brain_N6
	WT_CA1_intensity	KO_CA1_intensity		WT_CA1_intensity	KO_CA1_intensity		WT_CA1_intensity	KO_CA1_intensity		WT_CA1_intensity	KO_CA1_intensity		WT_CA1_intensity	KO_CA1_intensity		WT_CA1_intensity	KO_CA1_intensity
	1664.48	1964.71		2102.2	1370.23		3139.71	1355.99		3289.44	1281.12		2083.16	1286.83		2456.78	2944.06
	2841.62	1934.58		2745.23	1783.21		2626.23	1804.08		3124.6	1193.34		2064.86	1170.24		2551.9	2686.11
	1461.19	1856.95		2603.36	1593.77		2978.48	1282.31		3424.63	1118.1		2450.97	2624.06		3319.73	2751.54
	2276.95	1825.23		3094.83	1894.57		2821.52	1307.49		3321.42	1779.75		3321.42	1291.32		3745.12	2155.12
	2405.78	1536.2		2640.42	1967.44		2949.98	1182.4		3289.44	1531.51		1077.94	2096.1		2741.75	2541.76
	2455.32	1487.33		2707.22	1547.32		3671.73	1149.32		1701.63	1328.42		2199.67	1693.71		2814.56	2726.67
	1948.3	1832.88		3073.5	1940.27		2931.79	1412.05		1346.58	1388.22					2692.09	2634.21
Average	2150.52	1776.84		2798.1	1841.86		3124.6	1370.23		1568.36	1341.75					2903.13
				3292.28	2200.2		3424.63	1249.3		1733.91	1527.76
				2784.13	1793.21		3074.3	1345.91		2464.59	1387.77
										2452
										2286.02
										2266.54
										2207.43
										2265.56
										2365.76
	WT_CA1_intensity	KO_CA1_intensity	Average	WT_CA1_intensity	KO_CA1_intensity					2444.24
N1	2150.52	1776.84	2592.67	0.829463	0.685334
N2	2784.13	1793.21	2592.67	1.07385	0.691646
N3	3074.3	1345.91	2592.67	1.18577	0.519121
N4	2444.24	1387.77	2592.67	0.942753	0.535269
N5	2199.67	1693.71	2592.67	0.84842	0.65327
N6	2903.13	2634.21	2592.67	1.11975	1.01602
Average	2592.67

## Sheet: CA2_intensity-P21
	Brain_N1			Brain_N2			Brain_N3			Brain_N4			Brain_N5			Brain_N6
	WT_CA2_intensity	KO_CA2_intensity		WT_CA2_intensity	KO_CA2_intensity		WT_CA2_intensity	KO_CA2_intensity		WT_CA2_intensity	KO_CA2_intensity		WT_CA2_intensity	KO_CA2_intensity		WT_CA2_intensity	KO_CA2_intensity
	1924.64	2079.97		2788.17	1719.04		1831.49	1351.43		2177.13	1235.59		2338.33	1000.59		1625.05	2405.62
	1805.09	1756.52		2286.95	1426.11		2767.89	1280.89		2781.95	1477.37		2381.12	1547.48		1629.84	2790.44
	1815.17	1892.3		1836.97	1249.27		2177.13	1157.36		3634.37	1268.34		2348.45	1777.02		2642.22	2656.38
	1725.31	1623.96		2416.38	1285.67		2781.95	1542.36		3428.87	1431.35		2107.68	1414.27		979.613	2515.73
	1971.29	2195.23		2191.68	1643.95		3634.37	1248.76		1965.2	1369.78		2604.25	1469.12		969.297	2720.14
Average	1848.3	1909.59		2304.03	1464.81		2638.57	1316.16		3215.37	1356.49		2355.97	1441.7		958.639	2616.57
							2638.57			3182.96						2414.26	2617.48
										3299.64						2516.01
										2960.69						2783.68
																2770.47
																1928.91
	WT_CA2_intensity	KO_CA2_intensity	Average	WT_CA2_intensity	KO_CA2_intensity
N1	1848.3	1909.59	2339.41	0.790071	0.816272
N2	2304.03	1464.81	2339.41	0.984877	0.626144
N3	2638.57	1316.16	2339.41	1.12788	0.562604
N4	2960.69	1356.49	2339.41	1.26557	0.579841
N5	2355.97	1441.7	2339.41	1.00708	0.616266
N6	1928.91	2617.48	2339.41	0.824528	1.11886
Average	2339.41

## Sheet: CA3_intensity-P21
	Brain_N1			Brain_N2			Brain_N3			Brain_N4			Brain_N5			Brain_N6
	WT_CA3_intensity	KO_CA3_intensity		WT_CA3_intensity	KO_CA3_intensity		WT_CA3_intensity	KO_CA3_intensity		WT_CA3_intensity	KO_CA3_intensity		WT_CA3_intensity	KO_CA3_intensity		WT_CA3_intensity	KO_CA3_intensity
	1434.62	2208.8		1755.01	1553.07		2647.95	1388.65		1412.01	1442.71		3115.77	2063.68		1037.96	2117.07
	1746.25	2206.8		1833.04	1352.74		2791.26	1253.31		1534.92	1487.91		1029.78	2218.7		2332.47	2067.6
	1961.52	1261.63		2782	1279.24		2489.36	1176.81		2924.94	1945.15		1999.98	2418.91		1589.12	2217.36
	1721.91	1553.07		2887.87	1136.16		2841.12	1241.77		1924.13	2112.37		2145.98	2012.17		1781.32	1983.25
	1755.01	1352.74		2868.48	1027.45		2827.99	1543.91		1990.45	1138.14		2072.88	1992.49		1685.22	2076.39
Average	1723.86	1716.61		2671.23	1255.88		2719.54	1320.89		1957.29	1625.26			2141.19			2092.33
				2270.68	1267.42
				1914.27
				1642.31
				2291.65
	WT_CA3_intensity	KO_CA3_intensity	Average	WT_CA3_intensity	KO_CA3_intensity
N1	1723.86	1716.61	2075.06	0.830755	0.82726
N2	2291.65	1267.42	2075.06	1.10438	0.61079
N3	2719.54	1320.89	2075.06	1.31058	0.636557
N4	1957.29	1625.26	2075.06	0.943247	0.783235
N5	2072.78	2141.19	2075.06	0.998902	1.03187
N6	1685.22	2092.33	2075.06	0.812131	1.00833
Average	2075.06

## Sheet: DG_intensity-P21
	Brain_N1			Brain_N2			Brain_N3			Brain_N4			Brain_N5			Brain_N6
	WT_DG_intensity	KO_DG_intensity		WT_DG_intensity	KO_DG_intensity		WT_DG_intensity	KO_DG_intensity		WT_DG_intensity	KO_DG_intensity		WT_DG_intensity	KO_DG_intensity		WT_DG_intensity	KO_DG_intensity
	1516.04	1339.75		1400.74	1379.6		1733.16	1119.63		2269.7	1237.71		1775.32	1188.35		2460.96	1338.27
	1297.33	1252.07		1756.02	1179.23		2136.18	1100.03		2355.51	1077.14		1738.67	1505.99		1369.38	1667.24
	1785.79	1066.58		1712.55	1039.58		2101.94	1310.36		2621.13	1042.75		1536.89	1230.01		1703.04	1912.35
	1457.06	1299.96		2409.2	1155.35		2475.82	1116.72		1574.36	1220.73		1920.37	1673.68		1809.48	1329.01
Average	1514.06	1239.59		1819.62	1188.44		2175.03	1252.57		1574.36	1058.84		1812.77	1137.82		1835.72	1561.72
							2124.43	1179.86		1416.28	993.669		1757.99	1347.17
										1899.47	1112		1757
										1931.84	1094.47
										1757.25	1056
										1901.53	1099.26
										1930.14
	WT_DG_intensity	KO_DG_intensity	Average	WT_DG_intensity	KO_DG_intensity
N1	1514.06	1239.59	1830.16	0.82728	0.677312
N2	1819.62	1188.44	1830.16	0.994242	0.649365
N3	2124.43	1179.86	1830.16	1.16079	0.644677
N4	1930.14	1099.26	1830.16	1.05463	0.600634
N5	1757	1347.17	1830.16	0.960025	0.736093
N6	1835.72	1561.72	1830.16	1.00304	0.853322
Average	1830.16

## Sheet: Fig 2I CA1_intensity-P60
	Brain_N1			Brain_N2			Brain_N3			Brain_N4			Brain_N5			Brain_N6
	WT_CA1_intensity	KO_CA1_intensity		WT_CA1_intensity	KO_CA1_intensity		WT_CA1_intensity	KO_CA1_intensity		WT_CA1_intensity	KO_CA1_intensity		WT_CA1_intensity	KO_CA1_intensity		WT_CA1_intensity	KO_CA1_intensity
	1504.44	1216.01		2019.67	1205.21		1739.08	1260.58		1596.55	1042.74		1697.73	975.528		1149.58	1058.85
	1343.49	1148.6		1192.6	1169.33		1755.92	1340.04		1457.75	1028.6		1732.68	876.41		1127.34	1177.68
	1555	1138.82		1263.56	1434.12		1978.13	1332.77		1739.38	1020.29		1276.31	1084.41		1046.73	1117.41
	1734.27	1439.28		1673.21	1235.11		1432.85	1309.16		1697.73	1125.13		1603.46	1311.98		1442.75	1471.32
	1257.08	1022.34		1372.35	1260.94		1831.53	1180.59		1737.19	935.961	Average	1577.55	1062.08		1191.6	1424.68
	1411.57	1041.8		2115.73		Average	1747.5	1284.63		1508.52	1030.54						1315.7
Average	1467.64	1167.81	Average	1606.19					Average	1622.85							1260.94
	WT_CA1_intensity	KO_CA1_intensity	Average	WT_CA1_intensity	KO_CA1_intensity
N1	1467.64	1167.81	1535.55	0.955772	0.760512
N2	1606.19	1260.94	1536.55	1.04532	0.820629
N3	1747.5	1284.63	1537.55	1.13655	0.835501
N4	1622.85	1030.54	1538.55	1.05479	0.669813
N5	1577.55	1062.08	1539.55	1.02468	0.689864
N6	1191.6	1260.94	1540.55	0.773488	0.818498
Average	1535.55

## Sheet: CA2_intensity-P60
	Brain_N1			Brain_N2			Brain_N3			Brain_N4			Brain_N5			Brain_N6
	WT_CA2_intensity	KO_CA2_intensity		WT_CA2_intensity	KO_CA2_intensity		WT_CA2_intensity	KO_CA2_intensity		WT_CA2_intensity	KO_CA2_intensity		WT_CA2_intensity	KO_CA2_intensity		WT_CA2_intensity	KO_CA2_intensity
	766.168	740.761		798.832	1513.3		1289.81	918.757		1427.82	861.481		1206.64	1077.42		1297.52	1367.3
	801.339	691.866		764.366	738.682		1331.77	1006.9		1346.97	893.902		1136.02	1033.46		1269.32	1473.15
	712.34	789.234		845.143	1108.23		1421.27	725.381		1379.46	812.841		911.757	1476.69		1261.23	1284.28
	698.67	698.231		923.145	743.174		1136.93	842.185		1260.04	790.455		1125.69	1121.93		1329.36	1423.65
	940.25	661.476		732.194	1125.39		1374.17	837.485		1522.69	1029.78		1043.92	1269.78		1222.69	1288.12
	783.753	716.314		625.915	1112.7		1310.79	866.142		1387.4	877.691		1084.81	1195.86		1276.02	1367.3
				781.599	1056.91
	WT_CA2_intensity	KO_CA2_intensity	Average	WT_CA2_intensity	KO_CA2_intensity
N1	783.753	716.314	1104.06	0.709882	0.648799
N2	781.599	1056.91	1104.06	0.707931	0.957295
N3	1310.79	866.142	1104.06	1.18724	0.784506
N4	1387.4	877.691	1104.06	1.25663	0.794966
N5	1084.81	1195.86	1104.06	0.98256	1.08314
N6	1276.02	1367.3	1104.06	1.15576	1.23843
Average	1104.06

## Sheet: CA3_intensity-P60
	Brain_N1			Brain_N2			Brain_N3			Brain_N4			Brain_N5			Brain_N6
	WT_CA3_intensity	KO_CA3_intensity		WT_CA3_intensity	KO_CA3_intensity		WT_CA3_intensity	KO_CA3_intensity		WT_CA3_intensity	KO_CA3_intensity		WT_CA3_intensity	KO_CA3_intensity		WT_CA3_intensity	KO_CA3_intensity
	1612.21	1207.63		1150.46	1197.45		1398.99	1262.6		1687.41	997.337		1625.2	849.591		1000.48	1458.85
	1352.6	1511.56		1140.78	1276.5		1423.74	1153.19		1364.37	913.288		1196.42	1381.45		1213.4	1230.38
	1723.93	1301.05		1024.93	1203.84		1531.83	1023.94		1629.35	1002.13		1073.74	1422.77		1153.98	1204.28
	1392.03	1418.15		1266.31	1270.11		1299.44	1293.44		1299.49	902.344		1273.49	1210.3		1124.08	1389.3
	1331.26	1359.6	Average	1145.62	1236.97		1402.83	1306.3		1648.83	961.458		1163.02	1225.57		1121.16	1440.26
Average	1482.41					Average	1411.37	1207.89	Average	1525.89	955.312		1458.86	1217.94	Average	1122.62	1344.61
												Average	1298.46
	WT_CA3_intensity	KO_CA3_intensity	Average	WT_CA3_intensity	KO_CA3_intensity
N1	1482.41	1359.6	1331.06	1.1137	1.02144
N2	1145.62	1236.97	1331.06	0.860682	0.929315
N3	1411.37	1207.89	1331.06	1.06033	0.907469
N4	1525.89	955.312	1331.06	1.14637	0.717708
N5	1298.46	1217.94	1331.06	0.975505	0.915013
N6	1122.62	1344.61	1331.06	0.843405	1.01018
Average	1331.06

## Sheet: DG_intensity-P60
	Brain_N1			Brain_N2			Brain_N3			Brain_N4			Brain_N5			Brain_N6
	WT_DG_intensity	KO_DG_intensity		WT_DG_intensity	KO_DG_intensity		WT_DG_intensity	KO_DG_intensity		WT_DG_intensity	KO_DG_intensity		WT_DG_intensity	KO_DG_intensity		WT_DG_intensity	KO_DG_intensity
	729.406	825.264		866.731	620.38		847.095	740.94		1477.12	695.843		1065.7	1241.84		1057.45	1205.24
	872.137	1433.23		852.609	849.599		809.609	694.722		1186.14	651.277		1083.97	1108.39		1352.17	1064.29
	766.375	630.235		751.728	735.155		983.747	759.198		1568.24	798.345		1088.45	971.748		993.214	1034.67
	945.254	784.389		845.291	689.264		995.555	670.86		1297.49	641.294		1123.73	1029.24		950.977	1234.87
	719.476	1543.25		802.689	780.825		909.001	715.821		1273.11	600.274		1012.32	1185.41		1088.45	1134.77
	703.188	974.021		823.81	735.045			808.179		1187.68	654.327		1074.84	1107.33
Average	789.306	1031.73						731.62		1331.63	673.56
	WT_DG_intensity	KO_DG_intensity	Average	WT_DG_intensity	KO_DG_intensity
N1	789.306	1031.73	1002.84	0.787071	1.02881
N2	823.81	735.045	1002.84	0.821477	0.732963
N3	909.001	731.62	1002.84	0.906427	0.729548
N4	1331.63	673.56	1002.84	1.32786	0.671653
N5	1074.84	1107.33	1002.84	1.07179	1.10419
N6	1088.45	1134.77	1002.84	1.08537	1.13156
Average	1002.84
