# Supplementary material for: Endophilin A1 facilitates organization of the GABAergic postsynaptic machinery to maintain excitation-inhibition balance
Source: eLife. 2025 Oct 2;13:RP102792. doi: 10.7554/eLife.102792 (PMC12490859; doi:10.7554/eLife.102792)
Supplement: Figure 3—figure supplement 1—source data 1. [file elife-102792-fig3-figsupp1-data1.xlsx]

## Sheet: Fig3-s1G % of GPN
		Total number of EndoA1		The number of GPN CCC with EndoA1	% of GPN
N1	MAX_Final Display of RL-0.tif	128	MAX_Contribution of Final Display of RL-2.tif	64	0.5
N2	MAX_Final Display of RL-0.tif	94	MAX_Contribution of Final Display of RL-2.tif	36	0.382979
N3	MAX_Final Display of RL-0.tif	125	MAX_Contribution of Final Display of RL-1.tif	80	0.64
N4	MAX_Final Display of RL-0.tif	192	MAX_Contribution of Final Display of RL-2.tif	93	0.484375
N5	MAX_Final Display of RL-0.tif	122	MAX_Contribution of Final Display of RL-2.tif	33	0.270492
N6	MAX_Final Display of RL-0-1.tif	113	MAX_Contribution of Final Display of RL-2.tif	41	0.362832
N7	MAX_Final Display of RL-0.tif	84	MAX_Contribution of Final Display of RL-2.tif	33	0.392857
N8	MAX_Final Display of RL-0.tif	47	MAX_Contribution of Final Display of RL-2.tif	23	0.489362
N9	MAX_Final Display of RL-0.tif	93	MAX_Contribution of Final Display of RL-2.tif	43	0.462366
N10	MAX_Final Display of RL-0.tif	352	MAX_Contribution of Final Display of RL-2.tif	146	0.414773
N11	MAX_Final Display of RL-0.tif	124	MAX_Contribution of Final Display of RL-2.tif	85	0.685484
N12	MAX_Final Display of RL-0.tif	152	MAX_Contribution of Final Display of RL-2.tif	85	0.559211
N13	MAX_Final Display of RL-0.tif	155	MAX_Contribution of Final Display of RL-2.tif	70	0.451613
N14	MAX_Final Display of RL-0.tif	124	MAX_Contribution of Final Display of RL-2.tif	63	0.508065

## Sheet: Fig3-s1G % of Bassoon
		Total number of EndoA1		The number of bassoon CCC with EndoA1	% of Bassoon
N1	MAX_Final Display of RL-1.tif	231	MAX_Contribution of Final Display of RL-2.tif	121	0.52381
N2	MAX_Final Display of RL-1.tif	130	MAX_Contribution of Final Display of RL-2.tif	37	0.284615
N3	MAX_Final Display of RL-1.tif	478	MAX_Contribution of Final Display of RL-2.tif	162	0.338912
N4	MAX_Final Display of RL-1.tif	208	MAX_Contribution of Final Display of RL-2.tif	116	0.557692
N5	MAX_Final Display of RL-1.tif	277	MAX_Contribution of Final Display of RL-2.tif	74	0.267148
N6	MAX_Final Display of RL-1.tif	165	MAX_Contribution of Final Display of RL-2.tif	105	0.636364
N7	MAX_Final Display of RL-1.tif	219	MAX_Contribution of Final Display of RL-2.tif	81	0.369863
N8	MAX_Final Display of RL-1.tif	196	MAX_Contribution of Final Display of RL-2.tif	67	0.341837
N9	MAX_Final Display of RL-1.tif	94	MAX_Contribution of Final Display of RL-2.tif	33	0.351064
N10	MAX_Final Display of RL-1.tif	381	MAX_Contribution of Final Display of RL-2.tif	163	0.427822
N11	MAX_Final Display of RL-1.tif	87	MAX_Contribution of Final Display of RL-2.tif	60	0.689655
N12	MAX_Final Display of RL-1.tif	200	MAX_Contribution of Final Display of RL-2.tif	113	0.565
N13	MAX_Final Display of RL-1.tif	148	MAX_Contribution of Final Display of RL-2.tif	76	0.513514
N14	MAX_Final Display of RL-1.tif	293	MAX_Contribution of Final Display of RL-2.tif	222	0.757679
