# Supplementary material for: Endophilin A1 facilitates organization of the GABAergic postsynaptic machinery to maintain excitation-inhibition balance
Source: eLife. 2025 Oct 2;13:RP102792. doi: 10.7554/eLife.102792 (PMC12490859; doi:10.7554/eLife.102792)
Supplement: Figure 3—source data 3. [file elife-102792-fig3-data3.xlsx]

## Sheet: Fig3B, GFP-raw data
	sγ2 mean intensity per dendrite	sγ2 mean intensity per neuron	sGluA1 mean intensity of per dendrite	sGluA1 mean intensity per neuron	Dendrite length	sγ2 number	sγ2 number per 10μm in dendrite	sγ2 number per 10μm in neuron	sGluA1 number in dendrite	sGluA1 number per 10μm in dendrite	sGluA1 number per 10μm in neuron
20210121-GFP-gamma2647-GluA1488-1-F.ics	1695.24		2074.87		26.41	14	5.30102		19	7.19424
20210121-GFP-gamma2647-GluA1488-1-F1-MaxIP	1467.07		1884.5		32.58	26	7.98036		9	2.76243
20210121-GFP-gamma2647-GluA1488-1-P-MaxIP	1291.52		2340.76		35.22	24	6.81431		37	10.5054
20210121-GFP-gamma2647-GluA1488-1-S-MaxIP	1028.58		1150.26		30.46	32	10.5056		37	12.1471
20210121-GFP-gamma2647-GluA1488-1-T-MaxIP	1559.53		2116.69		31.69	37	11.6756		43	13.5689
20210121-GFP-gamma2647-GluA1488-1-T1-MaxIP	1352.2	1399.02	2088.14	1942.54	34.43	15	4.35667	7.77226	21	6.09933	8.7129
20210121-GFP-gamma2647-GluA1488-2-F-MaxIP	772.69		1709.12		38.25	15	3.92157		21	5.4902
20210121-GFP-gamma2647-GluA1488-2-P-MaxIP	655.67		1624.08		32.64	17	5.20833		13	3.98284
20210121-GFP-gamma2647-GluA1488-2-S-MaxIP	1088.1		2277.62		34.73	13	3.74316		2	0.575871
20210121-GFP-gamma2647-GluA1488-2-S1-MaxIP	891.55		1720.53		34.43	22	6.38978		20	5.80889
20210121-GFP-gamma2647-GluA1488-2-S2-MaxIP	1758.73		2148.62		32.26	23	7.12957		10	3.09981
20210121-GFP-gamma2647-GluA1488-2-S3-MaxIP	1315.8		1355.44		31.68	27	8.52273		7	2.2096
20210121-GFP-gamma2647-GluA1488-2-T-MaxIP	970.9	1064.78	1933.23	1824.09	32.11	17	5.2943	5.74421	22	6.85145	4.00267
20210121-GFP-gamma2647-GluA1488-3-F-MaxIP	1358.41		1560.28		33.66	24	7.13012		17	5.05051
20210121-GFP-gamma2647-GluA1488-3-P-MaxIP	1411.93		1715.45		50.052	30	5.99377		33	6.59314
20210121-GFP-gamma2647-GluA1488-3-P1-MaxIP	1641.54		1304.42		31.1	42	13.5048		51	16.3987
20210121-GFP-gamma2647-GluA1488-3-S-MaxIP	1553.12		2081.12		49.6	41	8.26613		26	5.24194
20210121-GFP-gamma2647-GluA1488-3-S1-MaxIP	2096.48		2827.76		31.74	20	6.3012		6	1.89036
20210121-GFP-gamma2647-GluA1488-3-T-MaxIP	815.06	1479.42	1609.65	1849.78	31.03	13	4.18949	7.56426	20	6.44538	6.93667
20210121-GFP-gamma2647-GluA1488-4-P-MaxIP	1493.54		1897.04		32.02	29	9.05684		26	8.11993
20210121-GFP-gamma2647-GluA1488-4-S-MaxIP	1055.9		1858.39		39.06	28	7.16846		33	8.44854
20210121-GFP-gamma2647-GluA1488-4-S1-MaxIP	1031.84		1813.85		32.35	15	4.63679		25	7.72798
20210121-GFP-gamma2647-GluA1488-4-S2-MaxIP	1312.86		2863.5		33.26	23	6.91521		27	8.11786
20210121-GFP-gamma2647-GluA1488-4-T-MaxIP	1130.67		1710.44		39.99	23	5.75144		23	5.75144
20210121-GFP-gamma2647-GluA1488-4-T1-MaxIP	1092.85	1186.28	2122.18	2044.23	32.77	14	4.2722	6.30016	17	5.18767	7.22557
20210121-GFP-gamma2647-GluA1488-5-T-MaxIP	1470.51		2743.24		32.34	23	7.11194		23	7.36272
20210121-GFP-gamma2647-GluA1488-5-P-MaxIP	1423.17		2673.42		31.87	22	6.90304		21	6.63181
20210121-GFP-gamma2647-GluA1488-5-F-MaxIP	1283.47		2751.57		32.74	23	7.02505		25	7.63592
20210121-GFP-gamma2647-GluA1488-5-S-MaxIP	1610.21	1446.84	2665.09	2708.33	32.98	22	6.67071	6.92768	19	5.76107	6.84788
20210121-GFP-gamma2647-GluA1488-6-P-MaxIP	1692.57		1917.94		31.74	30	9.4518		20	6.3012
20210121-GFP-gamma2647-GluA1488-6-S-MaxIP	1319.8	1506.18	1601.97	1759.95	31.79	17	5.34759	7.39969	13	4.08934	5.19527
20210121-GFP-gamma2647-GluA1488-8-P-MaxIP	703.87		1588.97		32.88	9	2.73723		16	4.86618
20210121-GFP-gamma2647-GluA1488-8-P1-MaxIP	1471.59		2828.02		31.48	16	5.08259		21	6.6709
20210121-GFP-gamma2647-GluA1488-8-S-MaxIP	1235.16		2183.06		32.78	11	3.3557		13	3.96583
20210121-GFP-gamma2647-GluA1488-8-T-MaxIP	1766.28	1294.22	2173.01	2193.26	31.56	32	10.1394	5.32874	18	5.70342	5.30158
20210121-GFP-gamma2647-GluA1488-1-P1-MaxIP	1715.42		1921.65		53.84	46	8.54383		15	2.78603
20210121-GFP-gamma2647-GluA1488-1-P3-MaxIP	1136.71		2085.52		31.76	15	4.72292		7	2.20403
20210121-GFP-gamma2647-GluA1488-1-S-MaxIP	1457.88		1769.35		32.51	35	10.7659		52	15.9951
20210121-GFP-gamma2647-GluA1488-9-T-MaxIP	1754.39	1516.1	2168.85	1986.34	29.76	29	9.74462	8.44432	16	5.37634	6.59037
20210121-GFP-gamma2647-GluA1488-9-P-MaxIP	1186.9		1671.39		32.58	11	3.3763		36	11.0497
20210121-GFP-gamma2647-GluA1488-9-P1-MaxIP	920.96		2300.81		31.42	15	4.77403		36	11.4577
20210121-GFP-gamma2647-GluA1488-9-S-MaxIP	779.87		1462.67		34.73	22	6.33458		50	14.3968
20210121-GFP-gamma2647-GluA1488-9-S1-MaxIP	948.16		1549.54		32.74	21	6.41417		25	7.63592
20210121-GFP-gamma2647-GluA1488-9-S2-MaxIP	937.15		2255		34.64	21	6.06236		37	10.6813
20210121-GFP-gamma2647-GluA1488-9-T-MaxIP	929.48	950.42	2302.24	1923.61	32.39	18	5.55727	5.41979	31	9.57086	10.7987
20210121-GFP-gamma2647-GluA1488-10-P2-MaxIP	1552.82		1853.19		33.36	23	6.89448		27	8.09353
20210121-GFP-gamma2647-GluA1488-10-S-MaxIP	1363.63		1349.36		35.19	24	6.82012		18	5.11509
20210121-GFP-gamma2647-GluA1488-10-S1-MaxIP	1081.5		1985.73		31.91	11	3.4472		4	1.25353
20210121-GFP-gamma2647-GluA1488-10-T-MaxIP	1088.26	1271.55	1188.54	1594.2	47.79	22	4.60347	5.44132	23	4.81272	4.81872
20210121-GFP-gamma2647-GluA1488-11-S1-MaxIP	1329.95		1291.65		33.23	21	6.31959		29	8.72705
20210121-GFP-gamma2647-GluA1488-11-T-MaxIP	1340.82	1335.38	1553.24	1422.44	32.59	25	7.67106	6.99533	36	11.0463	9.88669
20210121-GFP-gamma2647-GluA1488-12-F-MaxIP	1674.24		2494.09		32.2	31	9.62733		21	6.52174
20210121-GFP-gamma2647-GluA1488-12-T-MaxIP	1810.37		2079.81		34.42	25	7.26322		30	8.71586
20210121-GFP-gamma2647-GluA1488-12-S-MaxIP	1461.47		2428.93		31.04	28	9.02062		26	8.37629
20210121-GFP-gamma2647-GluA1488-12-P-MaxIP	2023.14	1742.31	2144.97	2286.95	29.1	32	10.9966	9.22693	30	10.3093	8.48079
20210121-GFP-gamma2647-GluA1488-13-F-MaxIP	1388.58		2095.96		32.53	28	8.60744		28	8.60744
20210121-GFP-gamma2647-GluA1488-13-P-MaxIP	1293.71		1999.93		31.88	39	12.2334		36	11.2923
20210121-GFP-gamma2647-GluA1488-13-P1-MaxIP	1294.41		2010.73		74.89	54	7.21058		67	8.94645
20210121-GFP-gamma2647-GluA1488-13-T-MaxIP	1360.74	1334.36	2293.21	2099.96	69.23	60	8.66676	9.17954	83	11.989	10.2088
20210121-GFP-gamma2647-GluA1488-14-P-MaxIP	1027.43		2293.21		32.18	23	7.1473		51	15.8484
20210121-GFP-gamma2647-GluA1488-14-T-MaxIP	1123.71		1894.34		30.87	25	8.09848		40	12.9576
20210121-GFP-gamma2647-GluA1488-14-S-MaxIP	1352.12		2016.36		33.25	37	11.1278		30	9.02256
20210121-GFP-gamma2647-GluA1488-14-F-MaxIP	1416.38	1229.91	1948.97	2038.22	35.42	46	12.987	9.84015	42	11.8577	12.4215
20210121-GFP-gamma2647-GluA1488-15-P-MaxIP
20210121-GFP-gamma2647-GluA1488-15-S-MaxIP

## Sheet: Fig 3B,Cre-raw data
	sγ2 mean intensity per dendrite	sγ2 mean intensity per neuron	sGluA1 mean intensity per dendrite	sGluA1 mean intensity per neuron	Dendrite lenth	sGluA1 number in dendrite	sγ2 number per 10μm in dendrite	sγ2 number per 10μm in neuron	sGluA1 number in dendrite	sγ2 number per 10μm in neuron	sGluA1 number in dendrite
20210121-CRE-gamma2647-GluA1488-1-F-MaxIP	983.12		1797.26		5	17	43.75	1.14286	3.88571
20210121-CRE-gamma2647-GluA1488-1-P-MaxIP	850.22		1843.38		20	34	32.87	6.08458	10.3438
20210121-CRE-gamma2647-GluA1488-1-P1-MaxIP	690.13	841.157	1405.26	1681.97	8	13	30.13	2.65516	4.31464	3.2942	6.18138
20210121-CRE-gamma2647-GluA1488-2-F-MaxIP	604.74		2282.25		13	10	32.77	3.96704	3.05157
20210121-CRE-gamma2647-GluA1488-2-F1-MaxIP	836.49		1538.93		15	16	41.79	3.58938	3.82867
20210121-CRE-gamma2647-GluA1488-2-P-MaxIP	609.88		1761.98		13	37	32.23	4.03351	11.48
20210121-CRE-gamma2647-GluA1488-2-P1-MaxIP	1035.22		1750.3		19	23	31.85	5.96546	7.22135
20210121-CRE-gamma2647-GluA1488-2-S-MaxIP	704.97		2060.14		22	20	31.79	6.92042	6.29129
20210121-CRE-gamma2647-GluA1488-2-S1-MaxIP	565.76		1947.23		21	27	32.05	6.55226	8.42434
20210121-CRE-gamma2647-GluA1488-2-S2-MaxIP	701.71		1998.06		10	18	31.88	3.13676	5.64617
20210121-CRE-gamma2647-GluA1488-2-T-MaxIP	739.75		1980.96		32	26	64.01	4.99922	4.06187
20210121-CRE-gamma2647-GluA1488-2-T1-MaxIP	567.69		2008.23		14	20	31.93	4.38459	6.2637
20210121-CRE-gamma2647-GluA1488-2-T2-MaxIP	657.85	702.406	1997.1	1932.52	7	6	32	2.1875	1.875	4.57361	5.81439
20210121-CRE-gamma2647-GluA1488-3-P-MaxIP	914.93		2357.53		15	10	27.13	5.52893	3.68596
20210121-CRE-gamma2647-GluA1488-3-P1-MaxIP	1163.01		2288.19		16	20	65.89	2.42829	3.03536
20210121-CRE-gamma2647-GluA1488-3-P2-MaxIP	1146.3		1763.71		28	44	35.66	7.85193	12.3388
20210121-CRE-gamma2647-GluA1488-3-S-MaxIP	346.86		2224.24		12	34	31.81	3.7724	10.6885
20210121-CRE-gamma2647-GluA1488-3-S1-MaxIP	456.32	805.484	2365.14	2199.76	15	35	46.73	3.20993	7.48984	4.5583	7.44767
20210121-CRE-gamma2647-GluA1488-4-P-MaxIP	588.74		1127.41		17	27	33.5	5.07463	8.0597
20210121-CRE-gamma2647-GluA1488-4-P1-MaxIP	710.21		1548.01		23	13	32.1	7.16511	4.04984
20210121-CRE-gamma2647-GluA1488-4-P2-MaxIP	905.54		1163.23		7	25	34.59	2.02371	7.22752
20210121-CRE-gamma2647-GluA1488-4-S-MaxIP	870.98	768.867	1649.57	1372.06	29	43	48.62	5.96462	8.8441	5.05702	7.04529
20210121-CRE-gamma2647-GluA1488-5-T-MaxIP	1080.36	1080.36	2459.21	2459.21	10	6	33.1	3.02115	1.81269	3.02115	1.81269
20210121-CRE-gamma2647-GluA1488-6-S-MaxIP	736.21		2136.53		10	5	32.14	3.11139	1.55569
20210121-CRE-gamma2647-GluA1488-6-P-MaxIP	979.11		2463.9		12	19	31.71	3.7843	5.9918
20210121-CRE-gamma2647-GluA1488-6-S1-MaxIP	474.52	729.947	2965.85	2522.09	14	10	32.9	4.25532	3.03951	3.717	3.529
20210121-CRE-gamma2647-GluA1488-7-P-MaxIP	721.68	721.68	2142.72	2142.72	11	14	31.87	3.45152	4.39285	3.45152	4.39285
20210121-GFP-gamma2647-GluA1488-8-S-MaxIP	1192.68		1601.34		21	24	33.9	6.19469	7.07965
20210121-GFP-gamma2647-GluA1488-8-P-MaxIP	1434.14		2745.85		14	47	32.78	4.2709	14.338
20210121-GFP-gamma2647-GluA1488-8-T-MaxIP	1172.4		1764.82		44	65	52.33	8.40818	12.4212
20210121-CRE-gamma2647-GluA1488-8-F-MaxIP	508.44		1904.25		24	36	34.16	7.02576	10.5386
20210121-CRE-gamma2647-GluA1488-8-S-MaxIP	895.47		1864.55		60	62	59.35	10.1095	10.4465
20210121-CRE-gamma2647-GluA1488-8-T2-MaxIP	681.76	980.815	1710.78	1931.93	43	81	44.19	9.73071	18.3299	7.62329	12.1923
20210121-CRE-gamma2647-GluA1488-9-P-MaxIP	913		1580.44		33	53	59.67	5.53042	8.88219
20210121-CRE-gamma2647-GluA1488-9-P1-MaxIP	868.8		1627.29		24	30	37.84	6.34249	7.92812
20210121-CRE-gamma2647-GluA1488-9-S-MaxIP	859.21		2315.78		19	40	31.81	5.97296	12.5747
20210121-CRE-gamma2647-GluA1488-9-S1-MaxIP	691.1		2444.54		19	29	31.81	5.97296	9.11663
20210121-CRE-gamma2647-GluA1488-9-T-MaxIP	719.57	810.336	1703.83	1934.38	22	22	34.13	6.44594	6.44594	6.05296	8.98951
20210121-CRE-gamma2647-GluA1488-10-P-MaxIP	1623.54		2041.54		23	40	40.93	5.61935	9.77278
20210121-CRE-gamma2647-GluA1488-10-S-MaxIP	1069.02		2165.14		16	14	32.25	4.96124	4.34109
20210121-CRE-gamma2647-GluA1488-10-T-MaxIP	1305.96	1332.84	2219.94	2142.21	24	25	32.56	7.37101	7.67813	5.98387	7.264
20210121-CRE-gamma2647-GluA1488-11-P-MaxIP	2103.41		1696.36		18	39	32.97	5.45951	11.8289
20210121-CRE-gamma2647-GluA1488-11-P1-MaxIP	1468.03	1785.72	1640.02	1668.19	14	27	53.09	2.63703	5.0857	4.04827	8.45732
20210121-CRE-gamma2647-GluA1488-12-[-MaxIP	796.8		1811.62		25	19	35.29	7.08416	5.38396
20210121-CRE-gamma2647-GluA1488-12-F-MaxIP	572.53		2085.2		10	33	31.59	3.16556	10.4463
20210121-CRE-gamma2647-GluA1488-12-P1-MaxIP	1021.05		2530.32		14	13	33.22	4.21433	3.91331
20210121-CRE-gamma2647-GluA1488-12-S-MaxIP	1064.36		2183.84		17	20	31.06	5.47328	6.43915
20210121-CRE-gamma2647-GluA1488-12-T-MaxIP	973.55	885.658	2053.8	2132.96	25	23	33.08	7.55744	6.95284	5.49895	6.62712
20210121-CRE-gamma2647-GluA1488-13-P-MaxIP	1759.56		1463.28		31	18	32.06	9.66937	5.61447
20210121-CRE-gamma2647-GluA1488-13-P1-MaxIP	2053.41	1906.48	1814.49	1638.88	41	31	33.36	12.2902	9.29257	10.9798	7.45352
20210121-CRE-gamma2647-GluA1488-14-P.ics	894.87		2154.68		21	40	46.99	4.46904	8.51245
20210121-CRE-gamma2647-GluA1488-14-S-MaxIP	851.39		1915.9		14	21	32.83	4.26439	6.39659
20210121-CRE-gamma2647-GluA1488-14-S1-MaxIP	820.99		2041.45		13	26	32.01	4.06123	8.12246
20210121-CRE-gamma2647-GluA1488-14-S2-MaxIP	1068.83		1788.6		18	22	28.31	6.35818	7.77111
20210121-CRE-gamma2647-GluA1488-14-T-MaxIP	1178.8		1831.65		24	30	32.13	7.46965	9.33707
20210121-CRE-gamma2647-GluA1488-14-T1-MaxIP	798.59	935.578	2603.75	2056.01	11	25	31.79	3.46021	7.86411	5.01378	8.00063
20210121-CRE-gamma2647-GluA1488-15-P-MaxIP	560.48		1953.87		6	17	32.1	1.86916	5.29595
20210121-CRE-gamma2647-GluA1488-15-S-MaxIP	866.28		2407.35		15	35	32.14	4.66708	10.8899
20210121-CRE-gamma2647-GluA1488-15-T-MaxIP	707.84	711.533	2052.57	2137.93	10	37	35.14	2.84576	10.5293	3.12733	8.90504
20210121-CRE-gamma2647-GluA1488-16-F-MaxIP	620.59		1783.68		4	19	38.42	1.04112	4.94534
20210121-CRE-gamma2647-GluA1488-16-P-MaxIP	619.33		1841.08		7	16	31.56	2.218	5.06971
20210121-CRE-gamma2647-GluA1488-16-P1-MaxIP	889.17		2474.07		13	32	31.33	4.14938	10.2139
20210121-CRE-gamma2647-GluA1488-16-P2-MaxIP	686.55		2129.25		8	40	40.01	1.9995	9.9975
20210121-CRE-gamma2647-GluA1488-16-S-MaxIP	859.87	735.102	1639.94	1973.6	9	24	35.1	2.5641	6.83761	2.39442	7.4128
20210121-CRE-gamma2647-GluA1488-17-P-MaxIP	892.69		3071.06		11	19	31.53	3.48874	6.02601
20210121-CRE-gamma2647-GluA1488-17-P1-MaxIP	929.82		2507.43		11	7	31.84	3.45477	2.19849
20210121-CRE-gamma2647-GluA1488-17-S-MaxIP	830.27		2902.66		13	16	31.99	4.06377	5.00156
20210121-CRE-gamma2647-GluA1488-17-S1-MaxIP	435.5		1977.24		5	13	32.02	1.56152	4.05996
20210121-CRE-gamma2647-GluA1488-17-S2-MaxIP	658.3	749.316	2034.77	2498.63	4	7	32.03	1.24883	2.18545	2.76353	3.8943
20210121-CRE-gamma2647-GluA1488-18-p-MaxIP	948.9		2448.85		12	13	34.48	3.48028	3.7703
20210121-CRE-gamma2647-GluA1488-18-P1-MaxIP	1578.1		1538.78		57	54	88.26	6.45819	6.11829
20210121-CRE-gamma2647-GluA1488-18-S-MaxIP	997.72		1696.74		23	23	33.53	6.85953	6.85953
20210121-CRE-gamma2647-GluA1488-18-S1-MaxIP	1211.46		1741.87		36	32	50.59	7.11603	6.32536
20210121-CRE-gamma2647-GluA1488-18-T-MaxIP	677.22	1082.68	1486.47	1782.54	9	10	33.98	2.64862	2.94291	5.31253	5.20328

## Sheet: Fig 3B normalize
GFP_sγ2 mean intensity per neuron	Cre_sγ2 mean intensity per neuron		GFP_sγ2 mean intensity per neuron	Cre_sγ2 mean intensity per neuron		GFP_sGluA1 mean intensity per neuron	Cre_sGluA1 mean intensity per neuron		GFP_sGluA1 mean intensity per neuron	Cre_sGluA1 mean intensity per neuron		GFP_sγ2 number per 10μm in neuron	Cre_sγ2 number per 10μm in neuron		GFP_sγ2 number per 10μm in neuron	Cre_sγ2 number per 10μm in neuron		sGluA1 number per 10μm in neuron	sGluA1 number per 10μm in neuron		sGluA1 number per 10μm in neuron	sGluA1 number per 10μm in neuron
1399.02	841.157	1339.77	1.04423	0.627837		1942.54	1681.97	1920.1	1.01169	0.875979		7.77226	3.2942	7.25897	1.07071	0.45381		8.7129	6.18138	7.67344	1.13546	0.805555
1064.78	702.406	1339.77	0.794746	0.524273		1824.09	1932.52	1920.1	0.949998	1.00647		5.74421	4.57361	7.25897	0.791325	0.630063		4.00267	5.81439	7.67344	0.521626	0.75773
1479.42	805.484	1339.77	1.10424	0.601211		1849.78	2199.76	1920.1	0.963377	1.14565		7.56426	4.5583	7.25897	1.04206	0.627953		6.93667	7.44767	7.67344	0.903984	0.970578
1186.28	768.867	1339.77	0.885433	0.57388		2044.23	1372.06	1920.1	1.06465	0.714575		6.30016	5.05702	7.25897	0.867913	0.696657		7.22557	7.04529	7.67344	0.941633	0.91814
1446.84	1080.36	1339.77	1.07992	0.806377		2708.33	2459.21	1920.1	1.41052	1.28077		6.92768	3.02115	7.25897	0.954361	0.416195		6.84788	1.81269	7.67344	0.892413	0.236229
1506.18	729.947	1339.77	1.12421	0.54483		1759.95	2522.09	1920.1	0.916596	1.31352		7.39969	3.717	7.25897	1.01939	0.512056		5.19527	3.529	7.67344	0.677045	0.459898
1294.22	721.68	1339.77	0.966005	0.53866		2193.26	2142.72	1920.1	1.14227	1.11594		5.32874	3.45152	7.25897	0.734089	0.475483		5.30158	4.39285	7.67344	0.6909	0.572474
1516.1	980.815	1339.77	1.13161	0.732077		1986.34	1931.93	1920.1	1.0345	1.00616		8.44432	7.62329	7.25897	1.16329	1.05019		6.59037	12.1923	7.67344	0.858855	1.5889
950.42	810.336	1339.77	0.70939	0.604832		1923.61	1934.38	1920.1	1.00183	1.00744		5.41979	6.05296	7.25897	0.746632	0.833858		10.7987	8.98951	7.67344	1.40728	1.17151
1271.55	1332.84	1339.77	0.949083	0.994827		1594.2	2142.21	1920.1	0.830272	1.11567		5.44132	5.98387	7.25897	0.749599	0.82434		4.81872	7.264	7.67344	0.627973	0.946642
1335.38	1785.72	1339.77	0.996727	1.33286		1422.44	1668.19	1920.1	0.740818	0.868804		6.99533	4.04827	7.25897	0.96368	0.557692		9.88669	8.45732	7.67344	1.28843	1.10215
1742.31	885.658	1339.77	1.30045	0.661052		2286.95	2132.96	1920.1	1.19106	1.11086		9.22693	5.49895	7.25897	1.27111	0.757538		8.48079	6.62712	7.67344	1.10521	0.863644
1334.36	1906.48	1339.77	0.995962	1.42299		2099.96	1638.88	1920.1	1.09367	0.853542		9.17954	10.9798	7.25897	1.26458	1.51258		10.2088	7.45352	7.67344	1.33041	0.97134
1229.91	935.578	1339.77	0.918001	0.698313		2038.22	2056.01	1920.1	1.06152	1.07078		9.88142	5.01378	7.25897	1.36127	0.690701		12.4215	8.00063	7.67344	1.61877	1.04264
1339.77	711.533	1339.77	1	0.531086		1127.57	2137.93	1920.1	0.587246	1.11345		7.25897	3.12733	7.25897	1	0.430823		7.67344	8.90504	7.67344	1	1.1605
	735.102	1339.77		0.548678		1920.1	1973.6	1920.1	1	1.02787			2.39442	7.25897		0.329857			7.4128	7.67344		0.966034
	749.316	1339.77		0.559287			2498.63	1920.1		1.3013			2.76353	7.25897		0.380705			3.8943	7.67344		0.507503
	1082.68	1339.77		0.808109			1782.54	1920.1		0.928359			5.31253	7.25897		0.731857			5.20328	7.67344		0.678089
