# Supplementary material for: Endophilin A1 facilitates organization of the GABAergic postsynaptic machinery to maintain excitation-inhibition balance
Source: eLife. 2025 Oct 2;13:RP102792. doi: 10.7554/eLife.102792 (PMC12490859; doi:10.7554/eLife.102792)
Supplement: Figure 3—source data 4. [file elife-102792-fig3-data4.xlsx]

## Sheet: Fig3D, mean intensity
mean intensity
GFP + Vector	GFP-2A-Cre +Vector	GFP-2A-Cre + EndoA1	Average	GFP + Vector	GFP-2A-Cre +Vector	GFP-2A-Cre + EndoA1
839.959	531.477	771.279	594.534	1.4128	0.893938	1.29728
758.189	493.632	664.705	594.534	1.27527	0.830283	1.11803
655.502	427.354	635.317	594.534	1.10255	0.718804	1.0686
614.746	424.971	632.781	594.534	1.034	0.714797	1.06433
584.521	420.443	612.115	594.534	0.983158	0.70718	1.02957
572.632	383.642	577.492	594.534	0.963161	0.645281	0.971335
541.669	381.743	554.254	594.534	0.911082	0.642088	0.93225
531.506	350.385	537.288	594.534	0.893987	0.589344	0.903712
518.455	311.808	474.133	594.534	0.872035	0.524458	0.797487
481.135	303.764	467.36	594.534	0.809263	0.510928	0.786095
441.561			594.534	0.742701
594.534
GFP + Vector	GFP-2A-Cre +Vector	GFP-2A-Cre + EndoA1	Average	GFP + Vector	GFP-2A-Cre +Vector	GFP-2A-Cre + EndoA1
612.91	452.853	582.149	495.73	1.23638	0.913507	1.17433
586.22	399.237	471.011	495.73	1.18254	0.805352	0.950135
494.697	382.1	410.241	495.73	0.997917	0.770782	0.82755
490.309	349.47	401.563	495.73	0.989064	0.704961	0.810044
471.983	349.043	399.536	495.73	0.952097	0.704098	0.805955
448.876	303.194	395.038	495.73	0.905484	0.611612	0.79688
448.829			495.73	0.905389
412.017			495.73	0.831131
495.73

## Sheet: Fig3D, number
number
GFP + Vector	GFP-2A-Cre +Vector	GFP-2A-Cre + EndoA1	Average	GFP + Vector	GFP-2A-Cre +Vector	GFP-2A-Cre + EndoA1
17.8893	8.3483	16.0743	9.59081	1.86526	0.870448	1.67601
11.75	7.73204	15.7764	9.59081	1.22513	0.806193	1.64495
11.1071	6.61672	15.4538	9.59081	1.1581	0.689903	1.61132
10.7874	5.69581	12.8219	9.59081	1.12476	0.593883	1.33689
9.65486	4.27224	12.1327	9.59081	1.00668	0.445451	1.26504
8.50544	4.04365	11.0354	9.59081	0.886832	0.421618	1.15062
7.30101	3.85559	7.20619	9.59081	0.761251	0.402009	0.751364
7.16495	3.31228	6.22487	9.59081	0.747064	0.345359	0.649046
6.63168	2.90205	5.56625	9.59081	0.691462	0.302586	0.580374
5.11631	2.79919	4.2102	9.59081	0.53346	0.291861	0.438983
9.59081
GFP + Vector	GFP-2A-Cre +Vector	GFP-2A-Cre + EndoA1	Average	GFP + Vector	GFP-2A-Cre +Vector	GFP-2A-Cre + EndoA1
9.51012	5.46369	9.49632	7.12541	1.33468	0.76679	1.33274
8.04689	4.13445	7.43066	7.12541	1.12932	0.580241	1.04284
7.71109	2.71906	6.43751	7.12541	1.0822	0.3816	0.903459
7.38884	2.53855	6.41482	7.12541	1.03697	0.356268	0.900274
7.06575	2.10699	4.83151	7.12541	0.991627	0.295701	0.678068
6.80472	2.03354	2.54234	7.12541	0.954994	0.285392	0.3568
6.54133			7.12541	0.91803
3.93451			7.12541	0.55218
7.12541
