# Supplementary material for: Endophilin A1 facilitates organization of the GABAergic postsynaptic machinery to maintain excitation-inhibition balance
Source: eLife. 2025 Oct 2;13:RP102792. doi: 10.7554/eLife.102792 (PMC12490859; doi:10.7554/eLife.102792)
Supplement: Figure 3—source data 5. [file elife-102792-fig3-data5.xlsx]

## Sheet: Fig 3F-raw data+normalize
	lane	Total	SYP		γ2			γ2		NL2			γ2		NR1			γ2		α1			γ2
mCherry	1		22330		15012.3	0.672292		0.854149		10409.9	0.466186		0.861378		22720.9	1.01751		1.02777		10598	0.474609		0.619289
mCherry	2		20296.9		15161.7	0.746994	ave	0.949057		11419.5	0.562622	ave	1.03956		22275.9	1.0975	ave	1.10858		18593	0.916049	ave	1.1953
mCherry	3		25376.5		23904.3	0.941985	0.78709	1.19679		15094.5	0.594821	0.54121	1.09906		21697.3	0.855017	0.990009	0.863646		23053.9	0.908475	0.766378	1.18541
Cre	4		23357.1		8959.89	0.383605		0.487371		7874.87	0.337152		0.622959		16356.7	0.700289		0.707356		13629.4	0.583525		0.761407
Cre	5		25021.4		12486.8	0.499046		0.634039		9562.75	0.382183		0.706165		16423.2	0.656368		0.662992		14462.6	0.57801		0.754211
Cre	6		15591.6		11296	0.724492		0.920468		12044.2	0.77248		1.42732		18332.6	1.1758		1.18766		11050.2	0.708723		0.92477
		Surface
			SYP		γ2			γ2		NL2					NR1				γ2	α1				γ2
mCherry	7				30578.7	0.672292	45484.2	42414	1.07239	28478.9	0.466186	61089.2	52429.4	1.16517	11750	1.01751	11547.8	10461.6	1.10382	15549.1	0.474609	32761.9	21532.9	1.52148
mCherry	8				35940.5	0.746994	48113.5	42414	1.13438	29211.6	0.562622	51920.5	52429.4	0.990292	11401.4	1.0975	10388.5	10461.6	0.993009	16315.1	0.916049	17810.3	21532.9	0.827121
mCherry	9				31692.4	0.941985	33644.2	42414	0.793235	26337.9	0.594821	44278.6	52429.4	0.844537	8078.73	0.855017	9448.62	10461.6	0.903167	12742.8	0.908475	14026.6	21532.9	0.6514
Cre	10				7254.12	0.379324	19123.8	42414	0.450885	21851.3	0.337152	64811.6	52429.4	1.23617	3886.42	0.700289	5549.74	10461.6	0.530484	1438.89	0.583525	2465.86	21532.9	0.114516
Cre	11				12295.4	0.499046	24637.8	42414	0.580889	27837.8	0.382183	72838.8	52429.4	1.38927	9291.63	0.656368	14156.1	10461.6	1.35314	1834.79	0.57801	3174.32	21532.9	0.147417
Cre	12				5341.9	0.724492	7373.31	42414	0.173842	9827.77	0.77248	12722.4	52429.4	0.242657	1810.38	1.1758	1539.7	10461.6	0.147176	529.678	0.708723	747.369	21532.9	0.0347082
						ave	42414				ave	52429.4				ave	10461.6				ave	21532.9
		Total	mCherry_NR1	Cre_NR1	mCherry_NL2	Cre_NL2	mCherry_γ2	Cre_γ2	mCherry_α1	Cre_α1
			1.02777	0.707356	0.861378	0.622959	0.854149	0.487371	0.619289	0.761407
			1.10858	0.662992	1.03956	0.706165	0.949057	0.634039	1.1953	0.754211
			0.863646	1.18766	1.09906	1.42732	1.19679	0.920468	1.18541	0.92477
		Surface	mCherry_NR1	Cre_NR1	mCherry_NL2	Cre_NL2	mCherry_γ2	Cre_γ2	mCherry_α1	Cre_α1
			1.10382	0.530484	1.16517	1.23617	1.07239	0.450885	1.52148	0.114516
			0.993009	1.35314	0.990292	1.38927	1.13438	0.580889	0.827121	0.147417
			0.903167	0.147176	0.844537	0.242657	0.793235	0.173842	0.6514	0.034708

## Sheet: Fig 3K-raw data+normalize
2021.06.06		Input-WT	Input-KO	anti-α1-WT	anti-α1-KO	anti-α1-WT	anti-α1-KO			anti-α1-WT	anti-α1-KO		anti-α1-WT	anti-α1-KO
	NLG2	9229	8110.12	18400.2	19478.2	1.00793	1.1837		NL2	1.00793	1.1837	1.01661	0.991469	1.16436
	GPN	9254.22	11225	22683.1	13234.3	1.24254	0.804251			1.33808	1.16263	1.01661	1.31622	1.14364
	α1	4358.71	4853.83	18255.4	16455.4					0.720913	1.2854	1.01661	0.709137	1.2644
										0.933337	1.02197	1.01661	0.918092	1.00528
2021.06.10		Input-WT	Input-KO	anti-α1-WT	anti-α1-KO					0.90179	0.96519	1.01661	0.88706	0.949425
	NLG2	7021.39	9348.65	16451.5	13576.4	1.33808	1.16263			1.19758	1.19271	1.01661	1.17802	1.17323
	GPN	10106.1	9639.55	13250.6	9857.45	1.07774	0.844152		Average	1.01661
	α1	1253.06	1953.67	12294.9	11677.3
		Input-WT	Input-KO	anti-α1-WT	anti-α1-KO				GPN	anti-α1-WT	anti-α1-KO		anti-α1-WT	anti-α1-KO
	NLG2	2443.69	1010.3	6831.49	11918.7	0.720913	1.2854			1.24254	0.804251	1.10117	1.12839	0.730362
	GPN	209.192	412.335	10106.1	1049.42	1.06647	0.113177			1.07774	0.844152	1.10117	0.978722	0.766597
	α1	3236.71	1632.79	9476.17	9272.39					1.06647	0.113177	1.10117	0.968491	0.102779
										1.22134	0.612564	1.10117	1.10913	0.556286
										1.04933	0.247713	1.10117	0.952929	0.224955
2021.06.09		Input-WT	Input-KO	anti-α1-WT	anti-α1-KO					0.949583	0.618999	1.10117	0.862342	0.56213
	GPN	8131.39	11388.8	24918	11568.9	0.949583	0.618999		Average	1.10117
	α1	9671.99	8921.68	26241	18689.8
		Input-WT	Input-KO	anti-α1-WT	anti-α1-KO				γ2	anti-α1-WT	anti-α1-KO		anti-α1-WT	anti-α1-KO
	NLG2	3589.3	2613.74	12488.1	13126.1	0.933337	1.02197			0.913345	0.77752	1.06161	0.860339	0.732396
	GPN	3747.25	292.021	16341.6	7867.69	1.22134	0.612564			0.900164	0.640951	1.06161	0.847923	0.603754
	α1	2909.71	1759.2	13380.1	12843.9					1.32252	0.907997	1.06161	1.24577	0.855301
										1.11042	0.558003	1.06161	1.04597	0.52562
2021.06.20	NLG2				NL2/α1				Average	1.06161
	Input-WT	20717.7	α1-WT	10929.3	0.90179
	Input-WT	21218.4	α1-WT	12339.4	1.19758
	Input-KO	20184.5	α1-KO	10720.3	0.96519
	Input-KO	18663.5	α1-KO	8310.08	1.19271
	α1
	Input-WT	6519.82	α1-WT	12119.6
	Input-WT	17337.6	α1-WT	10303.7
	Input-KO	19195.8	α1-KO	11106.9
	Input-KO	12288.4	α1-KO	6967.39
		Input-WT	Input-KO	anti-α1-WT	anti-α1-KO
2021.07.30	NLG2
	GPN	22204	8234.65	13633.8	14797.4	1.04933	0.247713
	α1			12992.8	59735.9
		Input-WT	Input-KO	anti-α1-WT	anti-α1-KO
	γ2	1725.62	1607.96	13463.6	8265.17	0.913345	0.77752
	α1	4955.25	5114.61	14740.9	10630.2
		Input-WT	Input-KO	anti-α1-WT	anti-α1-KO
	γ2	2095.15	3374.47	24850.6	15398.8	0.900164	0.640951
	α1	8630.02	6827.41	27606.8	24024.9
		Input-WT	Input-KO	anti-α1-WT	anti-α1-KO
	γ2	3669.69	4749.2	12922.5	8879.32	1.32252	0.907997
	α1	415.577	1896.4	9771.12	9779.02
		Input-WT	Input-KO	anti-α1-WT	anti-α1-KO
	γ2	3952.52	4646.07	27157.3	17132.4	1.11042	0.558003
	α1	10057.7	7904.5	24456.9	30703.1
