# Supplementary material for: Endophilin A1 facilitates organization of the GABAergic postsynaptic machinery to maintain excitation-inhibition balance
Source: eLife. 2025 Oct 2;13:RP102792. doi: 10.7554/eLife.102792 (PMC12490859; doi:10.7554/eLife.102792)
Supplement: Figure 3—source data 6. [file elife-102792-fig3-data6.xlsx]

## Sheet: Fig 3L-S1
	S1_WT	S1_KO	S1_WT	S1_KO
GPN	20118.8	51825.3	1.37387	2.03202				γ2	γ2	γ2	γ2	γ2	γ2	γ2	average
γ2	4759.44	12310.2	0.325013	0.482668			S1_WT	0.325013	0.223904	0.338428	0.259407	0.192207	0.304556	0.304066	0.278226
SYP	14643.9	25504.4					S1_KO	0.482668	0.425757	0.545414	0.189766	0.272125	0.358709	0.286415
								0.278226	0.278226	0.278226	0.278226	0.278226	0.278226	0.278226
	S1_WT	S1_KO	S1_WT	S1_KO			S1_WT	1.16816	0.804758	1.21638	0.932363	0.69083	1.09463	1.09287
NR1	18557.2	19438.1	0.882412	0.761205			S1_KO	1.73481	1.53026	1.96033	0.682056	0.978073	1.28928	1.02944
PSD95	19435	33446.6	0.924153	1.30979
NL2	11957.3	12452.4	0.568578	0.487644
GPN	3353.12	8637.55	0.159444	0.338251				GPN	GPN	GPN	GPN	GPN	GPN	GPN	average
α1	19206.3	28090.6	0.913277	1.10004			S1_WT	1.37387	1.20609	1.40915	1.51658	1.13049	1.40969	1.54478	1.37009
γ2	4708.73	10872.1	0.223904	0.425757			S1_KO	2.03202	2.29398	1.62633	1.21399	0.708855	1.63499	2.05364
SYP	21030.1	25535.9						1.37009	1.37009	1.37009	1.37009	1.37009	1.37009	1.37009
							S1_WT	1.00276	0.8803	1.02851	1.10692	0.825117	1.0289	1.1275
	S1_WT	S1_KO	S1_WT	S1_KO			S1_KO	1.48312	1.67433	1.18702	0.886067	0.517378	1.19334	1.49891
NR1	16173.6	13182.8	0.988804	0.776323
GPN	19727.7	38954.4	1.20609	2.29398
α1	18292.5	20783.5	1.11834	1.22392
γ2	5535.57	9261.75	0.338428	0.545414				NR1	NR1	NR1	NR1	NR1	NR1	NR1	NR1
SYP	16356.7	16981.1						0.882412	1.02433	0.500327	0.988804	0.976481	1.03286	0.611689	1.15722	0.871157
								0.761205	1.29911	0.712455	0.776323	1.72168	0.96844	1.25856	1.97019
	S1_WT	S1_KO	S1_WT	S1_KO				0.871157	0.871157	0.871157	0.871157	0.871157	0.871157	0.871157	0.871157
NR1	21166.8	30346.1	1.02433	1.29911			S1_WT	1.01292	1.17582	0.574325	1.13505	1.1209	1.18562	0.702157	1.32837
NR1	10338.8	16642.4	0.500327	0.712455			S1_KO	0.873786	1.49124	0.817826	0.89114	1.97632	1.11167	1.4447	2.26158
GluA1	9145.53	6947.32	0.40064	0.471603
SYP	20664.2	23359.2						PSD-95	PSD 95	PSD-95	PSD 95	PSD95	PSD95	PSD95	PSD95
tubulin	22827.3	14731.3						0.924153	1.07179	1.24047	0.700917	0.77657	0.929244	0.886832	0.978217	0.938524
								1.30979	0.788619	0.927927	0.603954	0.786653	0.831566	1.67219	0.552159
	S1_WT	S1_KO	S1_WT	S1_KO				0.938524	0.938524	0.938524	0.938524	0.938524	0.938524	0.938524	0.938524
PSD95	20149.8	19365	1.07179	0.788619			S1_WT	0.984687	1.14199	1.32173	0.746829	0.827438	0.990112	0.944922	1.04229
GPN	26492.3	39935.4	1.40915	1.62633			S1_KO	1.39558	0.840276	0.988709	0.643515	0.838181	0.886036	1.78172	0.588327
tubulin	18800.2	24555.6
EEN1	23095.5	3699.61	1.22847	0.150663				α1	α1	α1	α1	α1	α1	α1	α1
								0.913277	1.11834	0.934568	1.01668	0.66879	1.02994	1.05696	0.832245	0.946351
	S1_WT	S1_KO	S1_WT	S1_KO				1.10004	1.22392	0.912384	1.38265	1.05291	1.20083	0.401498	1.03032
PSD95	12615.4	10135.6	1.24047	0.927927				0.946351	0.946351	0.946351	0.946351	0.946351	0.946351	0.946351	0.946351
PSD95	18312.6	15863.5	0.700917	0.603954			S1_WT	0.965051	1.18174	0.987549	1.07432	0.706704	1.08833	1.11688	0.879425
GPN	15423.4	13260.3	1.51658	1.21399			S1_KO	1.1624	1.2933	0.964107	1.46103	1.1126	1.2689	0.424259	1.08873
GPN	29535.8	18618.9	1.13049	0.708855
SYP	10169.9	10922.8
SYP	26126.6	26266.1
EEN1	12350.1	2027.26	1.21438	0.185598				NL2	NL2	NL2	NL2	NL2	NL2	NL2	average
EEN1	29816.2	3057.96	1.14122	0.116422				0.568578	0.46774	0.497791	0.521135	0.585716	0.588553	0.579976	0.544213
								0.487644	0.437244	1.05645	0.634051	0.598112	0.638942	0.547346
	S1_WT	S1_KO	S1_WT	S1_KO				0.544213	0.544213	0.544213	0.544213	0.544213	0.544213	0.544213
PSD95	6802.24	5958.63	0.77657	0.786653			S1_WT	1.04477	0.85948	0.9147	0.957594	1.07626	1.08148	1.06572
SYP	8759.34	7574.66					S1_KO	0.896053	0.803443	1.94125	1.16508	1.09904	1.17407	1.00576
	S1_WT	S1_KO	S1_WT	S1_KO
PSD95	12515.9	9559.37	0.929244	0.831566				GluA1	GluA1	GluA1	GluA1	GluA1	GluA1	average
SYP	13468.9	11495.6					S1_WT	0.40064	0.37529	0.44768	0.255042	0.389408	0.383214	0.375212
							S1_KO	0.471603	0.606583	0.619576	0.243143	0.742079	0.278306
	S1_WT	S1_KO	S1_WT	S1_KO				0.375212	0.375212	0.375212	0.375212	0.375212	0.375212
NR1	4675.9	6749.12	0.976481	1.72168			S1_WT	1.06777	1.00021	1.19314	0.679726	1.03783	1.02133
PSD95	4246.61	6555.09	0.886832	1.67219			S1_KO	1.2569	1.61664	1.65127	0.648016	1.97776	0.741731
γ2	1343.75	2948.96	0.280619	0.752272
α1	868.163	1751.48	0.181301	0.446797				EEN1	EEN1	EEN1	EEN1	EEN1	EEN1	average
SYP	4788.52	3920.07					S1_WT	1.22847	1.21438	1.14122	1.11809	1.07331	0.87712	1.10877
							S1_KO	0.150663	0.185598	0.116422	0.177756	0.088276	0.0402577
								1.10877	1.10877	1.10877	1.10877	1.10877	1.10877
	S1_WT	S1_KO	S1_WT	S1_KO			S1_WT	1.10796	1.09525	1.02927	1.00841	0.968026	0.791078
NR1	9936.26	9873.92	1.03286	0.96844			S1_KO	0.135883	0.167392	0.105002	0.160319	0.0796164	0.0363085
PSD95	9410.58	5629.64	0.978217	0.552159
γ2	2495.54	1934.79	0.259407	0.189766
α1	8990.67	9302.38	0.934568	0.912384
SYP	9620.14	10195.7
	S1_WT	S1_KO	S1_WT	S1_KO
GPN	32395.9	31360.5	1.40969	1.63499
GluA1	8624.48	11634.8	0.37529	0.606583
NR1	14057.1	24140.2	0.611689	1.25856
NL2	11439.7	20263.6	0.497791	1.05645
NL2	10749.1	8386.7	0.46774	0.437244
γ2	2775.07	5060.05	0.120756	0.263807
EEN1	25694.8	3409.51	1.11809	0.177756
tubulin	22980.9	19180.8
	S1_WT	S1_KO	S1_WT	S1_KO
GluA1	5144.03	5941.99	0.44768	0.619576
GluA1	2930.54	2331.84	0.255042	0.243143
α1	11682.1	13260.2	1.01668	1.38265
tubulin	11490.4	9590.42
	S1_WT	S1_KO	S1_WT	S1_KO
GluA1	7477.56	12228.1	0.389408	0.742079
NL2	11247.1	9855.75	0.585716	0.598112
GPN	29663.4	33840.1	1.54478	2.05364
α1	9611.82	12125.4	0.500553	0.735851
γ2	3690.83	4484.1	0.192207	0.272125
tubulin	19202.4	16478.1
	S1_WT	S1_KO	S1_WT	S1_KO
α1	3095.26	894.003	1.05696	0.401498
SYP	2928.45	2226.67
	S1_WT	S1_KO	S1_WT	S1_KO
NR1	20695.8	34918.6	1.15722	1.97019
GAPDH	17884	17723.5
	S1_WT	S1_KO	S1_WT	S1_KO
γ2	1222.33	1401.05	0.304066	0.286415
γ2	3557.27	3441.83	0.304556	0.358709
tubulin	4019.95	4891.67
tubulin	11680.2	9595.05
	S1_WT	S1_KO	S1_WT	S1_KO
α1	9799.65	13493.1	0.66879	1.05291
α1	11733.2	18186.8	1.02994	1.20083
tubulin	14652.8	12815
tubulin	11392.1	15145.3
	S1_WT	S1_KO	S1_WT	S1_KO
NLG2	11976.1	12161.6	0.521135	0.634051
GluA1	10288.1	11884
GluA1	5861.07	4663.69
tubulin	22980.9	19180.8
α1	19125.7	19762.5	0.832245	1.03032
	S1_WT	S1_KO	S1_WT	S1_KO
NLG2	8223.22	12446.8	0.588553	0.638942
SYP	13971.9	19480.3
	14996.3	1719.65	1.07331	0.088276
NLG2	10667	9538.75	0.579976	0.547346
SYP	18392.1	17427.3
	16132.1	701.581	0.87712	0.0402577

## Sheet: Fig 3L-PSD
	S1_WT	S1_KO	S1_WT	S1_KO	PSD_WT	PSD_KO	PSD_WT	PSD_KO	PSD_WT	PSD_KO
GPN	20118.8	51825.3	1.37387	2.03202	36252.1	28818.4	34.972	45.7892	0.00173828	0.00088353			GPN	PSD_WT	0.00173828	0.00133351	0.0013009	0.00124307	0.00121491	0.00108165	0.00123849	0.00130726
γ2	4759.44	12310.2	0.325013	0.482668	10407.6	8234.72	10.0401	13.084	0.00210951	0.00106286				PSD_KO	0.00088353	0.000635722	0.00049419	0.000641343	0.000531689	0.000586694	0.000417346
SYP	14643.9	25504.4			1036.6	629.372									0.00130726	0.00130726	0.00130726	0.00130726	0.00130726	0.00130726	0.00130726
															1.32971	1.02008	0.99514	0.950898	0.929354	0.827419	0.947393
	S1_WT	S1_KO	S1_WT	S1_KO	PSD_WT	PSD_KO	PSD_WT	PSD_KO	PSD_WT	PSD_KO					0.675865	0.486302	0.378036	0.490602	0.406721	0.448797	0.319253
NR1	18557.2	19438.1	0.882412	0.761205	25178.3	28246.1	17.2032	20.2685	0.000927036	0.00104272
PSD95	19435	33446.6	0.924153	1.30979	20232.1	19627.4	13.8237	14.084	0.000711276	0.000421088
NL2	11957.3	12452.4	0.568578	0.487644	10518.7	6542.02	7.18696	4.69434	0.000601054	0.000376982			γ2	PSD_WT	0.00210951	0.00211276	0.00217306	0.00245701	0.00204287	0.00229603	0.00219854
GPN	3353.12	8637.55	0.159444	0.338251	6544.3	7652.35	4.47143	5.49108	0.00133351	0.000635722				PSD_KO	0.00106286	0.000957978	0.00195007	0.00125078	0.000596492	0.000420627
α1	19206.3	28090.6	0.913277	1.10004	9752.75	23692.6	6.66362	17.001	0.00034695	0.000605222					0.00219854	0.00219854	0.00219854	0.00219854	0.00219854	0.00219854
γ2	4708.73	10872.1	0.223904	0.425757	14560.3	14514.6	9.94841	10.4152	0.00211276	0.000957978					0.959506	0.960982	0.988412	1.11756	0.929195	1.04434
SYP	21030.1	25535.9			1463.58	1393.6									0.483441	0.435734	0.886982	0.568913	0.271313	0.191321
	S1_WT	S1_KO	S1_WT	S1_KO	PSD_WT	PSD_KO	PSD_WT	PSD_KO
NR1	16173.6	13182.8	0.988804	0.776323	30154.5	13011.7	15.55	7.35058	0.000961441	0.000557587			α1	PSD_WT	0.00034695	0.000339839	0.000185935	0.000328145	0.000225908	0.00017668	0.00021065	0.000259158
GPN	19727.7	38954.4	1.20609	2.29398	7656.53	5242.62	25.6639	19.2509	0.0013009	0.00049419				PSD_KO	0.000605222	0.000231043	0.000260131	0.000207324	0.000118548	0.00016077	0.000143827
α1	18292.5	20783.5	1.11834	1.22392	12055.1	8500.09	6.2165	4.80189	0.000339839	0.000231043					0.000259158	0.000259158	0.000259158	0.000259158	0.000259158	0.000259158	0.000259158
γ2	5535.57	9261.75	0.338428	0.545414	2332.7	3197.08	1.20291	1.8061	0.000217306	0.000195007					1.33876	1.31132	0.717457	1.2662	0.8717	0.681745	0.812825
SYP	16356.7	16981.1			1939.2	1770.15									2.33534	0.891514	1.00375	0.799992	0.457433	0.620357	0.554978
													NL2	PSD_WT	0.000601054	0.000549789	0.000670572	0.000498476	0.000437551	0.000633283	0.000565121
	S1_WT	S1_KO	S1_WT	S1_KO	PSD_WT	PSD_KO	PSD_WT	PSD_KO						PSD_KO	0.000376982	0.000732518	0.000341522	0.000407301	0.000452235	0.000932221
NR1	21166.8	30346.1	1.02433	1.29911	67418.7	50681.1	24.8947	27.4849	0.00117612	0.000905714					0.000565121	0.000565121	0.000565121	0.000565121	0.000565121	0.000565121
NR1	10338.8	16642.4	0.500327	0.712455	20805.8	19882.7	7.68264	10.7826							1.06359	0.97287	1.1866	0.88207	0.774261	1.12062
GluA1	9145.53	6947.32	0.40064	0.471603	21304.6	17297.3	7.86684	9.38049	0.000860184	0.00135023					0.667082	1.29622	0.604335	0.720733	0.800244	1.6496
SYP	20664.2	23359.2			1388.99	11411.8
tubulin	22827.3	14731.3			2708.15	1843.96							NR1	PSD_WT	0.000927036	0.000961441	0.00117612	0.00111761	0.000908693	0.00113795	0.00103814
														PSD_KO	0.00104272	0.000557587	0.000905714	0.000736038	0.00110231	0.00138167
	S1_WT	S1_KO	S1_WT	S1_KO	PSD_WT	PSD_KO	PSD_WT	PSD_KO							0.00103814	0.00103814	0.00103814	0.00103814	0.00103814	0.00103814
PSD95	20149.8	19365	1.07179	0.788619	17573.3	14374.7	14.0726	19.5031	0.000698397	0.00100713					0.892977	0.926117	1.13291	1.07655	0.875307	1.09614
GPN	26492.3	39935.4	1.40915	1.62633	41124	18877.5	32.9318	25.6123	0.00124307	0.000641343					1.00441	0.537101	0.872438	0.708996	1.06181	1.33091
tubulin	18800.2	24555.6			1248.76	737.049
EEN1	23095.5	3699.61	1.22847	0.150663									PSD-95	PSD_WT	0.000711276	0.000698397	0.000684401	0.000658691	0.000697491	0.000618631	0.000803409	0.000696042
														PSD_KO	0.000421088	0.00100713	0.000366902	0.00073084	0.000688497	0.000976847	0.000860736
															0.000696042	0.000696042	0.000696042	0.000696042	0.000696042	0.000696042	0.000696042
	S1_WT	S1_KO	S1_WT	S1_KO	PSD_WT	PSD_KO	PSD_WT	PSD_KO							1.02189	1.00338	0.983275	0.946337	1.00208	0.888784	1.15425
PSD95	12615.4	10135.6	1.24047	0.927927	13975.5	4551.41	8.63403	3.71877	0.000684401	0.000366902					0.604975	1.44694	0.527126	1.04999	0.98916	1.40343	1.23661
PSD95	18312.6	15863.5	0.700917	0.603954	15060.4	10795.5	12.0623	11.5937	0.000658691	0.00073084
GPN	15423.4	13260.3	1.51658	1.21399	30330.3	8628.91	18.738	7.05033	0.00121491	0.000531689			GluA1	PSD_WT	0.000860184	0.000722703	0.000740013	0.000645212	0.000933572	0.000893234	0.000799153
GPN	29535.8	18618.9	1.13049	0.708855	39887.7	10171.5	31.9474	10.9236	0.00108165	0.000586694				PSD_KO	0.00135023	0.000668543	0.000610219	0.000475526	0.00102699	0.00100335
SYP	10169.9	10922.8			1618.65	1223.9									0.000799153	0.000799153	0.000799153	0.000799153	0.000799153	0.000799153
SYP	26126.6	26266.1			1248.54	931.153									1.07637	0.904336	0.925997	0.80737	1.1682	1.11773
EEN1	12350.1	2027.26	1.21438	0.185598											1.68958	0.836564	0.763582	0.595038	1.2851	1.25552
EEN1	29816.2	3057.96	1.14122	0.116422
	S1_WT	S1_KO	S1_WT	S1_KO	PSD_WT	PSD_KO	PSD_WT	PSD_KO
PSD95	6802.24	5958.63	0.77657	0.786653	2775.7	2465.46	4.7445	4.1025	0.000697491	0.000688497
SYP	8759.34	7574.66			585.035	600.966
	S1_WT	S1_KO	S1_WT	S1_KO	PSD_WT	PSD_KO	PSD_WT	PSD_KO
PSD95	12515.9	9559.37	0.929244	0.831566	8117.94	7480.97	7.74274	9.33804	0.000618631	0.000976847
SYP	13468.9	11495.6			1048.46	801.129
	S1_WT	S1_KO	S1_WT	S1_KO	PSD_WT	PSD_KO	PSD_WT	PSD_KO
NR1	4675.9	6749.12	0.976481	1.72168	4328.82	4311.34	4.24896	7.43959	0.000908693	0.00110231
PSD95	4246.61	6555.09	0.886832	1.67219	3475.89	3269.73	3.41177	5.6422	0.000803409	0.000860736
γ2	1343.75	2948.96	0.280619	0.752272	3363.65	2137.54	3.3016	3.6885	0.00245701	0.00125078
α1	868.163	1751.48	0.181301	0.446797	164.456	264.034	0.161422	0.455613	0.000185935	0.000260131
SYP	4788.52	3920.07			1018.79	579.514
	S1_WT	S1_KO	S1_WT	S1_KO	PSD_WT	PSD_KO	PSD_WT	PSD_KO
NR1	9936.26	9873.92	1.03286	0.96844	10861.2	8639.76	7.35296	6.02525	0.000740013	0.000610219
PSD95	9410.58	5629.64	0.978217	0.552159	16967.1	24522.5
γ2	2495.54	1934.79	0.259407	0.189766	7530.43	1654.88	5.09806	1.15409	0.00204287	0.000596492
α1	8990.67	9302.38	0.934568	0.912384	4357.85	2765.48	2.95024	1.92861	0.000328145	0.000207324
SYP	9620.14	10195.7			1477.12	1433.93
	S1_WT	S1_KO	S1_WT	S1_KO	PSD_WT	PSD_KO	PSD_WT	PSD_KO
GPN	32395.9	31360.5	1.40969	1.63499	26822.5	10975.3	40.1218	13.0882	0.00123849	0.000417346
GluA1	8624.48	11634.8	0.37529	0.606583	4166.88	6522.68	6.23294	7.77834	0.000722703	0.000668543
NR1	14057.1	24140.2	0.611689	1.25856	10502.8	14899.8	15.7104	17.7681	0.00111761	0.000736038
NL2	11439.7	20263.6	0.497791	1.05645	5128.34	5803.3	7.67112	6.92049	0.000670572	0.000341522
NL2	10749.1	8386.7	0.46774	0.437244	3950.8	5151.68	5.90972	6.14341	0.000549789	0.000732518
γ2	2775.07	5060.05	0.120756	0.263807	4259.62	1784.8	6.37165	2.12839	0.00229603	0.000420627
EEN1	25694.8	3409.51	1.11809	0.177756	3736.95	502.607
tubulin	22980.9	19180.8			668.526	838.569
	S1_WT	S1_KO	S1_WT	S1_KO	PSD_WT	PSD_KO	PSD_WT	PSD_KO
NL2	11497.9	13665.5	0.500327	0.712455	7663.25	9334.89	5.73145	5.56597	0.000498476	0.000407301
GluA1	10288.1	11884	0.44768	0.619576	8875.33	9477.75	6.63799	5.65115	0.000645212	0.000475526
GluA1	5861.07	4663.69	0.255042	0.243143	7315.99	8032.77	5.47173	4.78957	0.000933572	0.00102699
α1	23364.2	26520.4	1.01668	1.38265	7057.18	5272.79	5.27817	3.14392	0.000225908	0.000118548
tubulin	22980.9	19180.8			1337.05	1677.14
	S1_WT	S1_KO	S1_WT	S1_KO	PSD_WT	PSD_KO	PSD_WT	PSD_KO
GluA1	7477.56	12228.1	0.389408	0.742079	5734.03	9590.98	5.53349	7.46179	0.000740013	0.000610219
NL2	11247.1	9855.75	0.585716	0.598112	5099.54	5728.93	4.9212	4.45711	0.000437551	0.000452235
GPN	29663.4	33840.1	1.54478	2.05364	21824.7	17529.2	21.0614	13.6377	0.000710015	0.000403004
α1	9611.82	12125.4	0.500553	0.735851	2098.11	2241.6	2.02473	1.74396	0.00021065	0.000143827
γ2	3690.83	4484.1	0.192207	0.272125	20347.7	11219.1
tubulin	19202.4	16478.1			1036.24	1285.35
	S1_WT	S1_KO	S1_WT	S1_KO	S1_WT	S1_KO	S1_WT	S1_KO
α1	3095.26	894.003	1.05696	0.401498	5302.45	1272.12	0.546869	0.143729	0.00017668	0.00016077
SYP	2928.45	2226.67			9696.02	8850.77
	S1_WT	S1_KO	S1_WT	S1_KO	PSD_WT	PSD_KO	PSD_WT	PSD_KO
NR1	20695.8	34918.6	1.15722	1.97019	35794.9	79572	23.5508	48.2459	0.00113795	0.00138167
GAPDH	17884	17723.5			1519.9	1649.3
	S1_WT	S1_KO	S1_WT	S1_KO
γ2	1222.33	1401.05	0.304066	0.286415
γ2	3557.27	3441.83	0.304556	0.358709
tubulin	4019.95	4891.67
tubulin	11680.2	9595.05
	S1_WT	S1_KO	S1_WT	S1_KO
α1	9799.65	13493.1	0.66879	1.05291
α1	11733.2	18186.8	1.02994	1.20083
tubulin	14652.8	12815
tubulin	11392.1	15145.3
	S1_WT	S1_KO	S1_WT	S1_KO
NLG2	11976.1	12161.6	0.521135	0.634051
GluA1	10288.1	11884
GluA1	5861.07	4663.69
tubulin	22980.9	19180.8
α1	19125.7	19762.5	0.832245	1.03032
	S1_WT	S1_KO	S1_WT	S1_KO
NLG2	8223.22	12446.8	0.588553	0.638942
SYP	13971.9	19480.3
	14996.3	1719.65	1.07331	0.088276
NLG2	10667	9538.75	0.579976	0.547346
SYP	18392.1	17427.3
	16132.1	701.581	0.87712	0.0402577
