# Supplementary material for: Endophilin A1 facilitates organization of the GABAergic postsynaptic machinery to maintain excitation-inhibition balance
Source: eLife. 2025 Oct 2;13:RP102792. doi: 10.7554/eLife.102792 (PMC12490859; doi:10.7554/eLife.102792)
Supplement: Figure 4—figure supplement 1—source data 1. [file elife-102792-fig4-figsupp1-data1.xlsx]

## Sheet: Fig 4-s1B
soma							dendrite																	mean intensity							number
mCherry+GPN.FingR	Cre+GPN.FingR	Average	mCherry+GPN.FingR	Cre+GPN.FingR			Source	mean intensity	mean intensity of per neuron	number	length	puncta number of per 10μm	puncta number of per neuron			Source	mean intensity	mean intensity of per neuron	number	length	puncta number of per 10μm	puncta number of per neuron		mCherry+GPN.FingR	Cre+GPN.FingR	Average	mCherry+GPN.FingR	Cre+GPN.FingR			mCherry+GPN.FingR	Cre+GPN.FingR		mCherry+GPN.FingR	Cre+GPN.FingR
2673.11	1080.97	2857.09	0.935607	0.378346			MAX_1-T-1.nd2:0002-0551-0512	683.974		8	38.536	2.07598				MAX_1-S-1.nd2:0002-0512-0218	286.053		15	33.727	4.44748			775.044	371.714	569.165	1.36172	0.653087			3.18666	3.21319	4.40035	0.724183	0.730212
2493.03	2316.54	2857.09	0.872576	0.810806			MAX_1-S1-2.nd2:0002-0415-0512	727.316		7	30.826	2.27081				MAX_1-P-1.nd2:0002-0511-0501	457.375	371.714	10	50.533	1.9789	3.21319		485.075	401.259	569.165	0.852259	0.704996			3.42565	1.80508	4.40035	0.778494	0.410213
2543.72	3319.75	2857.09	0.890321	1.16193			MAX_1-S-2.nd2:0002-0512-0417	763.992		13	31.69	4.10224				MAX_2-T-2.nd2:0002-0568-0512	372.191		6	30.742	1.95173			381.676	352.479	569.165	0.67059	0.619292			3.10663	3.68183	4.40035	0.705996	0.836712
1655.11	2951.03	2857.09	0.579301	1.03288			MAX_1-P-1.nd2:0002-0512-0497	962.458		17	39.991	4.25096				MAX_2-S-1.nd2:0002-0625-0512	354.819		4	38.847	1.02968			641.574	282.886	569.165	1.12722	0.49702			6.69064	2.41536	4.40035	1.52048	0.548901
1374.17	3296.56	2857.09	0.480968	1.15382			MAX_1-S-2.nd2:0002-0512-0454	737.482	775.044	10	30.928	3.23332	3.18666			MAX_2-P-1.nd2:0002-0330-0512	542.552		10	43.682	2.28927			498.58	441.741	569.165	0.875986	0.776123			5.51848	4.64108	4.40035	1.2541	1.05471
2495.26	1274.33	2857.09	0.873359	0.446026			MAX_2-T-2.nd2:0002-0487-0512	451.59		2	32.013	0.624746				MAX_2-F-1-1.nd2:0002-0636-0512	335.472	401.259	7	35.904	1.94964	1.80508		416.21	328.029	569.165	0.731265	0.576334			5.30031	3.54012	4.40035	1.20452	0.804508
3971.62	1371.11	2857.09	1.39009	0.479897			MAX_2-S-1.nd2:0002-0512-0599	522.183		34	69.227	4.91138				MAX_3-T-1.nd2:0002-0580-0512	267.281		5	31.897	1.56755			632.779	385.478	569.165	1.11177	0.677269			7.93178	2.22298	4.40035	1.80253	0.505182
923.697	3249.9	2857.09	0.3233	1.13749			MAX_2-P-1.nd2:0002-0438-0512	521.925		20	32.393	6.17417				MAX_3-S-1.nd2:0002-0512-0542	368.657		38	56.563	6.71817			489.269	254.622	569.165	0.859627	0.447361			4.23768	1.00068	4.40035	0.963032	0.227409
827.206	3712.36	2857.09	0.289528	1.29935			MAX_2-F-1.nd2:0002-0529-0512	444.604	485.075	6	30.116	1.9923	3.42565			MAX_3-P-1.nd2:0002-0434-0512	421.499	352.479	10	36.235	2.75976	3.68183		866.999	200.487	569.165	1.52328	0.352249			6.25501	1.02516	4.40035	1.42148	0.232972
3736.97	2454.52	2857.09	1.30796	0.859099			MAX_3-T-2.nd2:0002-0512-0767	380.286		10	40.108	2.49327				MAX_4-T-1.nd2:0002-0681-0512	271.687		5	31.543	1.58514			392.032	342.778	569.165	0.688786	0.602248			2.66948	2.24386	4.40035	0.606651	0.509927
3947.79	4055.35	2857.09	1.38175	1.4194			MAX_3-S-1.nd2:0002-0512-0667	416.35		9	30.997	2.90351				MAX_4-S-1.nd2:0002-0485-0512	310.859		18	61.539	2.92497			579.214	362.099	569.165	1.01766	0.636193			3.89523	2.59355	4.40035	0.88521	0.589396
2772.9	3985.93	2857.09	0.970533	1.3951			MAX_3-P-1.nd2:0002-0618-0512	348.393		12	34.482	3.48008				MAX_4-P-1-1.nd2:0002-0512-0555	329.076		11	31.558	3.48565			594.37	603.402	569.165	1.04429	1.06015			3.12162	3.99208	4.40035	0.709404	0.907218
3733.03	3235.7	2857.09	1.30659	1.13252					381.676	18	50.709	3.54967	3.10663			MAX_4-F-1-1.nd2:0002-0453-0512	219.923	282.886	5	30.018	1.66567	2.41536		646.315	547.248	569.165	1.13555	0.961493			1.86538	3.58172	4.40035	0.423917	0.813963
3733.03	3348.75	2857.09	1.30659	1.17208			MAX_6-T-1.nd2:0002-0512-0433	574.149		26	75.072	3.46334				MAX_5-S-1.nd2:0452-0521	456.781		15	30.377	4.93795			569.165							4.40035
3853.57	1952.79	2857.09	1.34877	0.683488			MAX_6-S-1.nd2:0002-0485-0512	693.595		23	29.904	7.69128				MAX_5-P-1.nd2:0002-0512-0668	426.702	441.741	22	50.642	4.34422	4.64108
3642.49	933.825	2857.09	1.2749	0.326845			MAX_6-P-1.nd2:0002-0614-0512	730.835		33	31.529	10.4666				MAX_6-T-1.nd2:0002-0512-0512	251.574		20	60.729	3.29332			593.502	349.269	388.821	1.52641	0.898278
4002.88	1179.91	2857.09	1.40104	0.412975			MAX_6-F-1.nd2:0002-0512-0693	567.719	641.574	16	31.12	5.14139	6.69064			MAX_6-S-1.nd2:0002-0460-0512	299.898		9	30.346	2.96579			288.217	296.795	388.821	0.741259	0.76332
3854.9	3325.16	2857.09	1.34924	1.16383			MAX_5-T1-1.nd2:0002-0512-0777	438.252		16	34.842	4.59216				MAX_6-P-1.nd2:0002-0503-0512	432.615	328.029	14	32.101	4.36123	3.54012		371.562	331.67	388.821	0.955613	0.853015			1.96635	1.33686	3.07645	0.639163	0.434547
2234.15	3675.26	2857.09	0.781969	1.28637			MAX_5-T-1.nd2:0002-0512-0531	486.696		22	36.082	6.09722				MAX_7-T-1.nd2:0002-0561-0512	350.178		8	30.902	2.58883			277.841	345.87	388.821	0.714573	0.889537			3.73471	1.60219	3.07645	1.21397	0.520791
2673.11	3845.38	2857.09	0.935607	1.34591			MAX_5-S-1-1.nd2:0002-0512-0659	512.913		31	44.654	6.94227				MAX_7-S-1-1.nd2:0002-0512-0584	439.032		9	41.437	2.17197			412.983	320.018	388.821	1.06214	0.823047			2.25473	4.00283	3.07645	0.7329	1.30112
2857.09							MAX_5-P-1.nd2:0002-0512-0598	595.384		26	31.806	8.17456				MAX_7-P-1-1.nd2:0002-0512-0531	367.223	385.478	7	36.685	1.90814	2.22298		388.821	252.221	388.821	1	0.648682			3.26288	2.15546	3.07645	1.0606	0.700631
							MAX_5-F-1-1.nd2:0002-0512-0597	459.657	498.58	8	44.788	1.78619	5.51848			MAX_8-T-1.nd2:0002-0530-0512	219.954		4	30.644	1.30531				311.791	388.821		0.801888			4.16358	1.81584	3.07645	1.35337	0.59024
							MAX_4-T1-1.nd2:0002-0512-0403	333.628		15						MAX_8-S-1.nd2:0002-0553-0512	268.196		3	30.601	0.98036				400.812	388.821		1.03084			3.07645	1.56809	3.07645	1	0.509706
							MAX_4-T-1.nd2:0002-0512-0335	391.131		18	31.766	5.66644				MAX_8-P-1.nd2:0002-0591-0512	301.648		6	43.495	1.37947				349.936	388.821		0.899993				0.897193	3.07645		0.291632
							MAX_4-S1-1.nd2:0002-0373-0512	457.634		16	31.073	5.14916				MAX_8-F-1.nd2:0002-0458-0512	228.69	254.622	1	29.623	0.337576	1.00068			324.046	388.821		0.833407				0.838785	3.07645		0.272647
							MAX_4-S-1-1.nd2:0002-0430-0512	412.405		17	31.413	5.41177				MAX_9-T-1-1.nd2:0002-0500-0510	218.134		10	60.786	1.64512											2.58832	3.07645		0.841331
							MAX_4-P-1.nd2:0002-0669-0512	495.6		34	54.101	6.28454				MAX_9-S-1-1.nd2:0002-0512-0576	172.961		1	31.263	0.319867											0.981124	3.07645		0.318914
							MAX_4-F-1.nd2:0002-0411-0512	406.864	416.21	12	30.078	3.98963	5.30031			MAX_9-S1-1.nd2:0002-0491-0512	238.115		4	31.325	1.27694											0.900902	3.07645		0.292838
							MAX_7-T-1.nd2:0002-0438-0511	515.425		17	30.954	5.49202				MAX_9-P-1.nd2:0002-0500-0512	221.75		3	33.165	0.904568
							MAX_7-S-1.nd2:0002-0499-0512	671.228		29	32.894	8.8162				MAX_9-F-1.nd2:0002-0512-0693	151.477	200.487	3	30.634	0.979304	1.02516
							MAX_7-P-1.nd2:0002-0525-0517	702.313		46	32.583	14.1178				MAX_10-T-1.nd2:0002-0512-0387	321.311		9	35.063	2.56681
							MAX_7-F-1.nd2:0002-0562-0512	642.15	632.779	11	33.322	3.30112	7.93178			MAX_10-S-1.nd2:0002-0409-0516	348.624		8	31.11	2.57152
							MAX_8-T-1.nd2:0002-0431-0512	390.265		15	51.658	2.90371				MAX_10-P-1.nd2:0002-0326-0512	391.725		6	31.65	1.89573
							MAX_8-S-1.nd2:0002-0512-0519	526.405		36	66.742	5.3939				MAX_10-F-1.nd2:0002-0534-0512	309.452	342.778	8	41.208	1.94137	2.24386
							MAX_8-F-1.nd2:0002-0512-0599	551.137	489.269	19	43.031	4.41542	4.23768			MAX_11-T-1.nd2:0002-0549-0512	342.09		9	30.291	2.97118
							MAX_9-T1-1.nd2:0002-0422-0512	656.563		26	61.238	4.24573				MAX_11-S-1.nd2:0002-0511-0512	304.181		8	30.49	2.62381
							MAX_9-T-1-1.nd2:0002-0512-0645	931.528		17	31.399	5.41419				MAX_11-P-1.nd2:0002-0230-0510	410.561		12	42.749	2.80708
							MAX_9-S-1-1.nd2:0002-0324-0512	1083.68		27	30.584	8.82815				MAX_11-F-1.nd2:0002-0496-0512	391.563	362.099	6	30.424	1.97213	2.59355
							MAX_9-P-1.nd2:0002-0374-0512	916.178		28	31.538	8.87818				MAX_12-T-1.nd2:0002-0512-0359	527.278		15	55.814	2.6875
							MAX_9-F1-1-1.nd2:0002-0642-0512	747.052		33	64.667	5.10307				MAX_12-S-1.nd2:0002-0512-0694	620.442		14	31.475	4.44797
							MAX_9-F-1-1.nd2:0002-0512-0660	964.974	883.328	16	31.616	5.06073	6.25501			MAX_12-P-1-1.nd2:0002-0514-0512	842.392		15	33.47	4.48163
							MAX_10-T-1.nd2:0002-0492-0554	381.81		10	27.76	3.60231				MAX_12-F-1.nd2:0002-0512-0702	423.496	603.402	14	32.175	4.3512	3.99208
							MAX_10-P-1-1.nd2:0002-0512-0618	430.864		8	37.103	2.15616				MAX_13-T2-1.nd2:0002-0433-0512	420.514		6	29.945	2.00367
							MAX_10-S-1.nd2:0002-0580-0512	363.423	392.032	8	35.556	2.24997	2.66948			MAX_13-T-1.nd2:0002-0512-0493	561.098		21	41.301	5.08462
							MAX_11-T-1.nd2:0002-0512-0438	443.265		16	67.286	2.37791				MAX_13-S-1.nd2:0002-0512-0603	550.154		16	30.611	5.22688
							MAX_11-S-1.nd2:0002-0512-0602	608.273		18	31.08	5.79151				MAX_13-P-1.nd2:0002-0512-0533	753.135		10	42.902	2.33089
							MAX_11-P-1.nd2:0002-0512-0605	686.103	579.214	11	31.283	3.51629	3.89523			MAX_13-F-1.nd2:0002-0512-0436	451.339	547.248	10	30.651	3.26254	3.58172
							MAX_12-T-1.nd2:0002-0512-0602	639.06		9	32.745	2.74851
							MAX_12-S-1.nd2:0002-0620-0512	584.648		7	34.369	2.03672
							MAX_12-P-1.nd2:0002-0426-0512	570.483		21	38.888	5.40012
							MAX_12-F-1.nd2:0002-0289-0512	583.29	594.37	12	52.148	2.30114	3.12162
							MAX_13-T-1.nd2:0002-0441-0512	540.604		6	31.72	1.89155
							MAX_13-S-1-1.nd2:0002-0512-0603	633.626		4	33.299	1.20124
							MAX_13-P-1.nd2:0002-0532-0512	764.714	646.315	8	31.957	2.50336	1.86538
							MAX_5-T-1.nd2:0512-0512	644.776		6	31.633	1.89675				MAX_11-T-1.nd2:0002-0563-0512	300.617		4	34.971	1.1438
							MAX_5-S-1.nd2:0002-0512-0575	774.326		3	32.775	0.915332				MAX_11-S-1.nd2:0002-0512-0551	340.191		5	36.666	1.36366
							MAX_5-P-1.nd2:0002-0512-0455	361.403	593.502	12	38.873	3.08698	1.96635			MAX_11-P-1.nd2:0002-0512-0557	407	349.269	5	33.264	1.50313	1.33686
							MAX_4-P-1.nd2:0002-0525-0507	288.217	288.217	12	32.131	3.73471	3.73471			MAX_10-T-1.nd2:0002-0502-0512	254.434		6	31.54	1.90235
							MAX_3-T-1.nd2:0002-0528-0512	237.948		6	31.352	1.91375				MAX_10-S-1.nd2:0002-0512-0536	200.9		7	30.881	2.26677
							MAX_3-F-1.nd2:0002-0512-0451	482.207		6	30.871	1.94357				MAX_10-P-1.nd2:0002-0512-0466	435.05	296.795	2	31.375	0.63745	1.60219
							MAX_3-S-1.nd2:0002-0301-0512	493.097		6	32.049	1.87213				MAX_9-S-1.nd2:0002-0528-0512	331.67	331.67	13	32.477	4.00283	4.00283
							MAX_3-P-1.nd2:0002-0455-0466	272.998	371.562	11	33.44	3.28947	2.25473			MAX_8-S-1.nd2:0002-0512-0503	295.76		7	31.689	2.20897
							MAX_2-S-1.nd2:0002-0644-0510	243.651		7	50.468	1.38702				MAX_8-F-1.nd2:0002-0611-0512	395.981	345.87	16	76.12	2.10194	2.15546
							MAX_2-P-1.nd2:0002-0512-0498	312.031	277.841	16	31.136	5.13875	3.26288			MAX_7-T-1.nd2:0002-0502-0512	403.654		4	36.595	1.09305
							MAX_1-T-1.nd2:0002-0512-0331	542.534		15	32.075	4.67654				MAX_7-T-1.nd2:0002-0419-0512	431.552	417.603	9	35.452	2.53864	1.81584
							MAX_1-p-1.nd2:0002-0512-0483	262.867		13	30.257	4.29653				MAX_6-S-1.nd2:0002-0601-0512	320.018	320.018	5	31.886	1.56809	1.56809
							MAX_1-F-1.nd2:0002-0512-0493	554.73		14	35.098	3.98883				MAX_5-T-1.nd2:0002-0512-0539	330.314		1	30.987	0.322716
							MAX_1-T-1.nd2:0002-0512-0514	291.8	412.983	12	32.499	3.69242	4.16358			MAX_5-S-1.nd2:0002-0612-0511	174.128	252.221	5	33.975	1.47167	0.897193
							MAX_1-p-1-1.nd2:0002-0569-0512	365.78		13						MAX_4-S-1.nd2:0002-0703-0512	311.791	311.791	4	47.688	0.838785	0.838785
																MAX_3-P-1.nd2:0002-0512-0433	444.346		11	30.791	3.57247
																MAX_3-S-1.nd2:0002-0512-0564	357.277	400.812	5	31.169	1.60416	2.58832
																MAX_2-T-1.nd2:0002-0512-0709	351.358		2	31.942	0.626135
																MAX_2-S-1.nd2:0002-0512-0450	339.177
																MAX_2-P-1.nd2:0002-0512-0499	359.274	349.936	5	37.422	1.33611	0.981124
																MAX_1-T-1.nd2:0002-0512-0484	284.442		5	44.418	1.12567
																MAX_1-S-1.nd2:0002-0446-0512	324.245		2	31.794	0.62905
																MAX_1-P-1.nd2:0002-0510-0512	363.451	324.046	3	31.646	0.947987	0.900902

## Sheet: Fig 4-s1D
soma							dendrite
mCherry+PSD95.FingR	Cre+PSD95.FingR	Average	mCherry+PSD95.FingR	Cre+PSD95.FingR			Source	mean intensity	mean intensity of per neuron	number	length	puncta number of per 10μm	puncta number of per neuron		Source	mean intensity	mean intensity of per neuron	number	length	puncta number of per 10μm	puncta number of per neuron				mean intensity						number
3665.77	3839.31	3459.85	1.05952	1.10968			MAX_1-T-1.nd2:0002-0536-0519	716.208		20	34.43	5.80889			MAX_1-P1-1.nd2:0002-0537-0512	1012.23		43	31.466	13.6655					mCherry_dendrites	Cre_dendrites	Average	mCherry_dendrites	Cre_dendrites		mCherry_dendrites	Cre_dendrites	Average	mCherry_dendrites	Cre_dendrites
3878.69	3648.35	3459.85	1.12106	1.05448			MAX_1-S-1.nd2:0002-0512-0468	771.952		22	39.626	5.55191			MAX_1-P-1.nd2:0002-0467-0512	1057.42	1034.83	25	30.943	8.07937	10.8725				805.381	1034.83	784.323	1.02685	1.31939		4.98637	10.8725	6.14043	0.812056	1.77064
3819.95	2267.09	3459.85	1.10408	0.655256			MAX_1-P-1.nd2:0002-0512-0496	927.983	805.381	13	36.128	3.59832	4.98637		MAX_2-T-1.nd2:0002-0512-0583	586.342		14	30.254	4.62749					736.198	616.745	784.323	0.938642	0.78634		7.81318	3.85147	6.14043	1.27242	0.627232
3729.53	3968.02	3459.85	1.07795	1.14688			MAX_2-T-1.nd2:0002-0475-0512	628.305		25	35.881	6.96748			MAX_2-S-1.nd2:0002-0512-0615	608.625		10	45	2.22222					933.261	662.995	784.323	1.18989	0.845308		9.11777	4.10406	6.14043	1.48488	0.668367
1016.03	1871.91	3459.85	0.293663	0.541038			MAX_2-S-1.nd2:0002-0512-0426	725.819		22	32.617	6.74495			MAX_2-P-1.nd2:0002-0512-0667	742.958		14	31.872	4.39257					1081.83	1351.1	784.323	1.37932	1.72264		10.0185	7.02932	6.14043	1.63156	1.14476
3798.23	3959.56	3459.85	1.0978	1.14443			MAX_2-P-1.nd2:0002-0512-0693	854.471	736.198	37	38.038	9.72711	7.81318		MAX_2-F-1.nd2:0002-0519-0667	529.053	616.745	17	40.83	4.16361	3.85147				1411.71	428.171	784.323	1.7999	0.545912		8.46334	1.91338	6.14043	1.3783	0.311604
3985.72	1624.94	3459.85	1.15199	0.469655			MAX_3-T-1.nd2:0002-0512-0469	741.378		11	35.008	3.14214			MAX_3-T-1.nd2:0002-0459-0512	563.211		16	32.295	4.95433					565.304	659.109	784.323	0.720754	0.840354		3.45412	4.40508	6.14043	0.562522	0.717389
4030.22	3942.46	3459.85	1.16486	1.13949			MAX_3-S-1.nd2:0002-0512-0457	835.555		32	41.39	7.73134			MAX_3-S-1.nd2:0002-0512-0568	733.523		19	49.12	3.86808					639.941	1157.74	784.323	0.815915	1.4761		6.14407	8.23116	6.14043	1.00059	1.34049
3508.88	3634.3	3459.85	1.01417	1.05042			MAX_3-P-1.nd2:0002-0512-0633	1335.58		70	40.12	17.4477			MAX_3-P-1.nd2:0002-0483-0655	795.067		13	36.185	3.59265					743.175	666.843	784.323	0.947536	0.850214		8.89478	4.064	6.14043	1.44856	0.661843
3501.35	3415.98	3459.85	1.01199	0.987322			MAX_3-F-1.nd2:0002-0515-0542	820.527	933.261	44	53.988	8.14996	9.11777		MAX_3-F-1.nd2:0002-0512-0517	560.178	662.995	15	37.489	4.00117	4.10406				1137.75	930.229	784.323	1.45061	1.18603		8.58793	7.03115	6.14043	1.39859	1.14506
3794.31	3921.09	3459.85	1.09667	1.13331			MAX_4-T-1.nd2:0002-0594-0512	1113.65		34	31.177	10.9055			MAX_4-T-1.nd2:0002-0557-0512	1243.45		20	33.06	6.04961					948.059	364.903	784.323	1.20876	0.465245		3.86271	1.60401	6.14043	0.629063	0.261221
2457.18	3349.74	3459.85	0.710197	0.968174			MAX_4-S-1.nd2:0002-0654-0512	972.65		26	32.022	8.11942			MAX_4-S-1.nd2:0002-0512-0437	1458.76	1351.1	44	54.938	8.00903	7.02932				233.724	731.655	784.323	0.297995	0.93285		1.43402	4.73813	6.14043	0.233538	0.771629
3792.17	3401.57	3459.85	1.09605				MAX_4-P-1.nd2:0002-0423-0512	1241.95		51	32.402	15.7398			MAX_5-T-1.nd2:0002-0584-0512	392.793		2	29.607	0.675516					623.264	529.382	784.323	0.794652	0.674954		5.30809	3.85081	6.14043	0.86445	0.627124
3459.85							MAX_4-F-1.nd2:0002-0605-0512	999.085	1081.83	19	35.787	5.30919	10.0185		MAX_5-S-1.nd2:0002-0512-0566	452.812		10	39.662	2.52131					336.609		784.323	0.429171			1.7407	2.59546	6.14043	0.283481	0.422685
							MAX_5-T-1.nd2:0002-0512-0610	1176.23		22	30.884	7.12343			MAX_5-P-1.nd2:0002-0383-0512	438.909	428.171	8	31.455	2.54332	1.91338				784.323						6.14043
							MAX_5-S-1.nd2:0002-0597-0512	1263.16		20	32.242	6.20309			MAX_6-T-1.nd2:0002-0540-0512	604.697		19	34.913	5.4421
							MAX_5-P-1.nd2:0002-0660-0512	1795.72	1411.71	37	30.671	12.0635	8.46334		MAX_6-S-1.nd2:0002-0658-0503	665.611		23	31.78	7.23726
							MAX_6-T-1.nd2:0002-0465-0512	561.499		10	31.209	3.2042			MAX_6-P-1.nd2:0002-0512-0590	719.2		10	31.767	3.14792
							MAX_6-P-1.nd2:0002-0454-0512	601.468		14	32.026	4.37145			MAX_6-F-1.nd2:0002-0700-0526	646.928	659.109	7	39.04	1.79303	4.40508
							MAX_6-F-1.nd2:0002-0578-0512	532.944	565.304	9	32.296	2.78672	3.45412		MAX_7-S-1-1.nd2:0002-0477-0512	1287.49		21	30.148	6.96564
							MAX_7-F-1.nd2:0002-0357-0508	618.924		30	47.886	6.26488			MAX_7-P-1.nd2:0002-0606-0512	1027.98	1157.74	29	30.537	9.49668	8.23116
							MAX_7-P-1.nd2:0002-0512-0575	635.126		17	40.1	4.2394			MAX_8-T-1.nd2:0002-0563-0512	687.984		8
							MAX_7-T-1.nd2:0002-0512-0592	620.618		16	38.329	4.17438			MAX_8-S-1.nd2:0002-0712-0512	660.129		16	36.813	4.34629
							MAX_7-S-1-1.nd2:0002-0705-0512	685.097	639.941	32	32.331	9.89762	6.14407		MAX_8-P-1.nd2:0002-0645-0513	638.334		21	33.638	6.24294
							MAX_8-F-1.nd2	656.982		13	31.009	4.19233			MAX_8-F-1.nd2:0002-0530-0480	680.924	666.843	5	31.196	1.60277	4.064
							MAX_8-T1-1.nd2:0002-0474-0512	737.595		39	29.979	13.0091			MAX_9-T-1.nd2:0002-0512-0618	760.561		14	33.356	4.19715
							MAX_8-T-1-1.nd2:0002-0512-0618	798.725		22	30.75	7.15447			MAX_9-S1-1.nd2:0002-0512-0628	1079.54		33	37.297	8.8479
							MAX_8-P-1.nd2:0002-0512-0264	808.81		37	38.427	9.62865			MAX_9-S-1.nd2:0002-0512-0690	817.017		16	32.606	4.90707
							MAX_8-S-1.nd2:0002-0548-0512	713.761	743.175	35	31.947	10.9556	8.89478		MAX_9-P1-1.nd2:0002-0512-0538	1153.21		30	38.955	7.70119
							MAX_9-T-1.nd2:0002-0512-0692	1244.86		35	41.526	8.42845			MAX_9-P-1.nd2:0002-0512-0588	840.816	930.229	36	37.885	9.50244	7.03115
							MAX_9-S-1.nd2:0002-0512-0512	1006.05		56	57.06	9.81423			MAX_4-T-1.nd2:0002-0512-0551	399.102		9	40.452	2.22486
							MAX_9-P-1.nd2:0002-0512-0654	1383.44		42	57.06	7.36067			MAX_4-S-1.nd2:0002-0512-0619	365.152		5	30.585	1.63479
							MAX_9-F-1.nd2:0002-0565-0512	916.623	1137.75	28	32.006	8.74836	8.58793		MAX_4-P-1.nd2:0002-0512-0732	330.454	364.903	3	31.5	0.952381	1.60401
																		27	56.502	4.77859
							MAX_1-T-1.nd2:0002-0512-0661	1183.4		9	31.304	2.87503						14	29.802	4.69767	4.73813
							MAX_1-S-1.nd2:0002-0512-0719	785.818		13	33.501	3.88048			MAX_1-S-1.nd2:0002-0512-0651	831.589		11	30.633	3.5909
							MAX_1-F-1.nd2:0001-0512-0636	874.96	948.059	15	31.039	4.83263	3.86271		MAX_1-P-1.nd2:0002-0512-0542	631.722	731.655	6	14.596	4.11072	3.85081
							MAX_5-P-1.nd2:0002-0512-0706	233.724	233.724	5	34.867	1.43402	1.43402		MAX_2-P-1.nd2:0002-0606-0512	618.271	529.382	8	30.823	2.59546	2.59546
							MAX_4-T-1.nd2:0002-0466-0512	767.477		15	31.871	4.70647
							MAX_4-S-1.nd2:0002-0479-0512	525.1		18	30.162	5.96777
							MAX_4-P-1.nd2:0002-0388-0514	577.214	623.264	16	30.476	5.25003	5.30809
							MAX_2-P-1.nd2:0002-0512-0575	353.068		5	34.306	1.45747
							MAX_2-S-1.nd2:0002-0634-0512	221.124		1	31.386	0.318613
							MAX_2-T-1.nd2:0002-0451-0512	435.635	336.609	11	31.921	3.44601	1.7407
