# Supplementary material for: Endophilin A1 facilitates organization of the GABAergic postsynaptic machinery to maintain excitation-inhibition balance
Source: eLife. 2025 Oct 2;13:RP102792. doi: 10.7554/eLife.102792 (PMC12490859; doi:10.7554/eLife.102792)
Supplement: Figure 4—figure supplement 1—source data 2. [file elife-102792-fig4-figsupp1-data2.xlsx]

## Sheet: Soma
mCherry	mCherry-2A-Cre	Average	mCherry	mCherry-2A-Cre
342.63	286.22	534.468	0.641067	0.535523
647.25	86.95	534.468	1.21102	0.162685
423.3	235.78	534.468	0.792003	0.441149
817.83	139.65	534.468	1.53018	0.261288
819.65	508.06	534.468	1.53358	0.95059
638.82	498.69	534.468	1.19524	0.933059
314	544.4	534.468	0.5875	1.01858
527.16	366.4	534.468	0.986327	0.685542
275.53	366.4	534.468	0.515522	0.685542
538.51	470.37	534.468	1.00756	0.880071
534.468	310.53	534.468	1	0.581008
442.674	243.82	358.966	1.23319	0.679228
386.777	267.487	358.966	1.07747	0.745159
301.453	277.283	358.966	0.839781	0.772449
296.79	252.154	358.966	0.826791	0.702445
369.916	255.997	358.966	1.0305	0.713151
308.197	307.158	358.966	0.858568	0.855674
406.957	405.832	358.966	1.13369	1.13056
358.966	273.77	358.966	1	0.762662
659.82	602.15	912.942	0.72274	0.659571
780.47	439.08	912.942	0.854895	0.48095
1050.25	322.44	912.942	1.1504	0.353188
754.85	590.59	912.942	0.826832	0.646908
873.64	475.77	912.942	0.95695	0.521139
1205.09	542.32	912.942	1.32001	0.594035
1012.28	842.83	912.942	1.10881	0.923202
967.14	970.99	912.942	1.05937	1.06358
912.942	828.05	912.942	1	0.907012
	829.25	912.942		0.908327
	488.78	912.942		0.53539
	485.44	912.942		0.531731
	351.78	912.942		0.385325
	529.81	912.942		0.580332
	651.75	912.942		0.7139
	775.74	912.942		0.849714
	652.54	912.942		0.714766
678.9	828.13	738.39	0.919433	1.12153
768.12	608.36	738.39	1.04026	0.823901
787.93	556.12	738.39	1.06709	0.753152
941.43	691.65	738.39	1.27498	0.9367
492.73	656.73	738.39	0.667303	0.889408
761.23	911.47	738.39	1.03093	1.2344
738.39	960.23	738.39	1	1.30044
	725.02	738.39		0.981893
	612.79	738.39		0.8299
407.615	431.471	369.171	1.10414	1.16876
331.754	361.687	369.171	0.898647	0.979729
333.669	313.086	369.171	0.903834	0.848079
371.443	373.62	369.171	1.00616	1.01205
401.372	387.306	369.171	1.08723	1.04912
369.171	344.231	369.171	1	0.932444
	258.065	369.171		0.69904
	187.31	369.171		0.507381
	260.766	369.171		0.706356
	296.668	369.171		0.803607
335.193	394.88	341.785	0.980713	1.15535
296.784	208.807	341.785	0.868335	0.610931
440.211	282.533	341.785	1.28798	0.82664
366.754	221.704	341.785	1.07305	0.648665
269.615	312.805	341.785	0.788844	0.91521
280.372	313.508	341.785	0.820317	0.917267
390.329		341.785	1.14203
301.938		341.785	0.883415
363.357		341.785	1.06312
373.297		341.785	1.0922
341.785		341.785	1
508.051	369.933	357.608	1.42069	1.03447
309.953	234.904	357.608	0.86674	0.656876
327.356	263.825	357.608	0.915405	0.737749
285.072	263.961	357.608	0.797163	0.738129
357.608		357.608	1

## Sheet: dendrites_30μm
mCherry	mCherry-2A-Cre	Average	mCherry	mCherry-2A-Cre
350.935	379.55	459.887	0.76309	0.825312
327.517	443.99	459.887	0.712168	0.965433
575.91	613.245	459.887	1.25229	1.33347
539.423	496.115	459.887	1.17295	1.07878
697.83	434.3	459.887	1.51739	0.944363
367.56	318.93	459.887	0.79924	0.693497
339.96		459.887	0.739225
479.96		459.887	1.04365
459.887		459.887	1
888.337	657.45	830.561	1.06956	0.791573
564.22	363.277	830.561	0.679324	0.437388
940.855	763.006	830.561	1.13279	0.918663
521.893	1186.62	830.561	0.628362	1.4287
821.685	756.54	830.561	0.989313	0.910878
620.03	424.345	830.561	0.74652	0.510914
1042.13	443.47	830.561	1.25473	0.53394
1358.93	714.97	830.561	1.63617	0.860828
1135.98	523.572	830.561	1.36772	0.630384
1034.4	855.838	830.561	1.24543	1.03043
1070.41		830.561	1.28878
513.363		830.561	0.618092
959.315		830.561	1.15502
984.42		830.561	1.18525
689.05		830.561	0.82962
467.39		830.561	0.56274
507.12		830.561	0.610575
830.561		830.561	1
967.734	374.194	511.997	1.89012	0.730852
442.01	453.198	511.997	0.863306	0.885158
437.482	226.938	511.997	0.854462	0.443241
433.909	363.58	511.997	0.847484	0.710121
318.774	325.423	511.997	0.62261	0.635596
472.072	301.377	511.997	0.922021	0.58863
511.997	401.719	511.997	1	0.784612
525.12	461.73	829.907	0.632745	0.556363
686.257	665.8	829.907	0.826908	0.802258
782.537	734.15	829.907	0.942921	0.884617
891.96	736.72	829.907	1.07477	0.887714
1168.32	544.3	829.907	1.40777	0.655856
925.255	424.52	829.907	1.11489	0.511527
829.907	690.25	829.907	1	0.831719
	865.85	829.907		1.04331
	804.78	829.907		0.969723
	441.53	829.907		0.532023
	507.03	829.907		0.610948
	647.4	829.907		0.780087
	779.005	829.907		0.938665
	480.925	829.907		0.579492
	578.35	829.907		0.696885
	711.37	829.907		0.857168
657.38	1007.38	569.765	1.15377	1.76806
544.185	702.23	569.765	0.955104	1.23249
723.91	629	569.765	1.27054	1.10396
552.97	658.325	569.765	0.970523	1.15543
534.63	688.72	569.765	0.938334	1.20878
570.69	1114.45	569.765	1.00162	1.95598
404.59	1166.51	569.765	0.7101	2.04735
569.765	685.54	569.765	1	1.2032
	762.61	569.765		1.33846
	817.66	569.765		1.43508
427.887	390.659	556.047	0.769515	0.702564
584.492	432.577	556.047	1.05116	0.777949
751.613	442.419	556.047	1.35171	0.79565
440.796	390.625	556.047	0.792731	0.702503
563.128	559.981	556.047	1.01273	1.00707
635.835	396.449	556.047	1.14349	0.712977
488.58	342.764	556.047	0.878666	0.61643
556.047
285.075	337.219	412.965	0.690313	0.81658
395.373	311.884	412.965	0.957401	0.755231
306.405	451.163	412.965	0.741964	1.0925
434.435	420.465	412.965	1.05199	1.01816
388.869	337.433	412.965	0.941651	0.817098
482.284	520.477	412.965	1.16786	1.26034
456.303	441.933	412.965	1.10494	1.07015
404.529	343.724	412.965	0.979572	0.832332
454.069	428.692	412.965	1.09953	1.03808
356.709	365.119	412.965	0.863775	0.88414
397.978	332.519	412.965	0.963709	0.805199
538.75		412.965	1.30459
514.228		412.965	1.24521
419.081		412.965	1.01481
360.388		412.965	0.872684
412.965		412.965	1
343.51	508.28	801.415	0.428629	0.634228
909.27	357.64	801.415	1.13458	0.446261
931.63	736.78	801.415	1.16248	0.919349
1246.93	742.6	801.415	1.55591	0.926611
1057.8	403.72	801.415	1.31992	0.503759
1007.2	468.65	801.415	1.25678	0.584778
428.91	485.44	801.415	0.535191	0.605729
486.07	653.63	801.415	0.606515	0.815595
801.415	388.08	801.415	1	0.484243
	362.22	801.415		0.451976
	343.7	801.415		0.428866
	527.64	801.415		0.658385
	689.31	801.415		0.860116
	298.99	801.415		0.373078
	450.19	801.415		0.561744
	314.75	801.415		0.392743
	275.51	801.415		0.343779
	332.65	801.415		0.415078
	593.67	801.415		0.740777
	352.38	801.415		0.439697
783.79	550.99	697.737	1.12333	0.789681
679.54	327.75	697.737	0.973919	0.469733
774.805	455.7	697.737	1.11045	0.653111
552.815	410.5	697.737	0.792297	0.58833
697.737	303.92	697.737	1	0.435579
	352.445	697.737		0.505125
	544.22	697.737		0.779978
	453.81	697.737		0.650402
343.51	417.805	801.415	0.428629	0.521334
909.27	736.78	801.415	1.13458	0.919349
931.63	267.99	801.415	1.16248	0.334396
1246.93	282.96	801.415	1.55591	0.353075
1057.8	317.71	801.415	1.31992	0.396436
1007.2	421.29	801.415	1.25678	0.525683
428.91	433.44	801.415	0.535191	0.540843
486.07	447.595	801.415	0.606515	0.558506
801.415	595.37	801.415	1	0.742898
	382.59	801.415		0.477393
	287.04	801.415		0.358166
	598.12	801.415		0.74633
	413.925	801.415		0.516493
	240.55	801.415		0.300157
304.77	362.707	450.275	0.676854	0.805523
637.75	404.02	450.275	1.41636	0.897275
474.975	359.815	450.275	1.05486	0.799101
338.847	240.84	450.275	0.752534	0.534874
457.422	350.945	450.275	1.01587	0.779402
479.803	443.62	450.275	1.06558	0.985221
506.58	342.195	450.275	1.12505	0.75997
402.05		450.275	0.8929
450.275		450.275	1

## Sheet: dendrites_60μm
mCherry	mCherry-2A-Cre	Average	mCherry	mCherry-2A-Cre
655.9	103.7	437.536	1.49908	0.237009
152.6	395.95	437.536	0.348771	0.904954
446.98	188.17	437.536	1.02158	0.430067
618.59	164.8	437.536	1.4138	0.376655
288.72	280.08	437.536	0.659877	0.64013
464.823	367.53	437.536	1.06237	0.839999
435.14	323.79	437.536	0.994523	0.74003
437.536	429.5	437.536	1	0.981633
	126.088	437.536		0.288176
	183.53	437.536		0.419462
853.1	623.815	795.86	1.07192	0.783825
488.11	368.27	795.86	0.613311	0.462732
933.27	106.92	795.86	1.17266	0.134345
587.043	761.17	795.86	0.737621	0.956412
730.605	1352.02	795.86	0.918007	1.69882
764.595	957.82	795.86	0.960716	1.2035
928.13	356.27	795.86	1.1662	0.447654
1323.9	495.51	795.86	1.66349	0.62261
1166.49	423.995	795.86	1.4657	0.532751
835.14	498.61	795.86	1.04936	0.626505
804.86	501.35	795.86	1.01131	0.629948
881.03	258.35	795.86	1.10702	0.324617
757.63	363.17	795.86	0.951964	0.456324
471.35	337.5	795.86	0.592252	0.42407
690.59		795.86	0.867728
573.74		795.86	0.720906
740.03		795.86	0.92985
795.86		795.86	1
578.255	292.251	406.161	1.42371	0.719545
349.663		406.161	0.860898
387.456		406.161	0.953947
309.27		406.161	0.761447
406.161		406.161	1
624.03	580.2	698.584	0.893278	0.830537
642.375	710.58	698.584	0.919539	1.01717
740.54	770.28	698.584	1.06006	1.10263
798.77	666.11	698.584	1.14341	0.953515
687.205	666.11	698.584	0.983711	0.953515
698.584	408.493	698.584	1	0.584745
	616	698.584		0.881784
	778.5	698.584		1.1144
	766.3	698.584		1.09693
	479.68	698.584		0.686646
	603.44	698.584		0.863804
	562.42	698.584		0.805086
	568	698.584		0.813073
	364.56	698.584		0.521856
	627.38	698.584		0.898074
672.78	976	626.147	1.07448	1.55874
544.83	583.705	626.147	0.870132	0.932218
779.89	497.33	626.147	1.24554	0.794271
547.61	728.805	626.147	0.874571	1.16395
567.69	579.295	626.147	0.906641	0.925175
644.08	1015.85	626.147	1.02864	1.62238
626.147	908.955	626.147	1	1.45166
	939.45	626.147		1.50037
	1018	626.147		1.62582
665.838	370.084	583.243	1.14161	0.634528
497.275	481.533	583.243	0.852603	0.825612
572.373	521.71	583.243	0.981363	0.894499
874.063	431.904	583.243	1.49863	0.740522
487.105	366.369	583.243	0.835166	0.628158
402.804	423.771	583.243	0.690628	0.726577
583.243
303.568	362.017	419.368	0.723871	0.863245
403.004	309.856	419.368	0.96098	0.738865
355.211	406.253	419.368	0.847016	0.968728
376.167	368.672	419.368	0.896986	0.879114
612.615	497.107	419.368	1.46081	1.18537
378.68	318.901	419.368	0.902979	0.760433
262.63	439.53	419.368	0.626253	1.04808
522.538	388.885	419.368	1.24601	0.927313
480.784	356.313	419.368	1.14645	0.849644
506.036	331.101	419.368	1.20666	0.789525
352.393		419.368	0.840296
484.936		419.368	1.15635
441.663		419.368	1.05316
385.467		419.368	0.919163
424.821		419.368	1.013
419.368		419.368	1
532.14	434.346	559.462	0.951164	0.776364
383.08	568.23	559.462	0.684729	1.01567
763.166	258.115	559.462	1.36411	0.461363
559.462	346.422	559.462	1	0.619206
	477.116	559.462		0.852812
549.58	432.96	520.43	1.05601	0.831927
568.47	739.69	520.43	1.09231	1.42131
818.79	403.72	520.43	1.5733	0.775743
327.53	468.65	520.43	0.629345	0.900505
337.78	569.535	520.43	0.64904	1.09435
520.43	405.41	520.43	1	0.77899
	298.99	520.43		0.574506
	386.525	520.43		0.742703
724.08	589.21	704.183	1.02825	0.836728
647.82	286.01	704.183	0.919959	0.406158
740.65	465.297	704.183	1.05179	0.660761
704.183	275.05	704.183	1	0.390594
	715.75	704.183		1.01643
		704.183
549.58	432.96	520.43	1.05601	0.831927
568.47	573.16	520.43	1.09231	1.10132
818.79	468.65	520.43	1.5733	0.900505
327.53	569.535	520.43	0.629345	1.09435
337.78	405.41	520.43	0.64904	0.77899
520.43	298.99	520.43	1	0.574506
	346.817	520.43		0.666404
	426.233	520.43		0.819002
223.74	297.56	390.834	0.572469	0.761347
536.817	307.96	390.834	1.37352	0.787957
483.757	233.47	390.834	1.23776	0.597364
291.81	280.652	390.834	0.746635	0.718087
418.045	150.63	390.834	1.06962	0.385407
390.834

## Sheet: dendrites_90μm
mCherry	mCherry-2A-Cre	Average	mCherry	mCherry-2A-Cre
387.19	207.85	404.357	0.957545	0.514026
526.82	360.72	404.357	1.30286	0.892083
420.1	536.15	404.357	1.03893	1.32593
498.52	58.47	404.357	1.23287	0.1446
306.41		404.357	0.757771
351.64		404.357	0.869628
412.35		404.357	1.01977
331.825		404.357	0.820624
404.357		404.357
795.52	577.84	723.493	1.09955	0.798681
594.17	347.215	723.493	0.821252	0.479915
682.225	175.13	723.493	0.94296	0.242062
347.98	506.277	723.493	0.480972	0.699767
630.62	634.69	723.493	0.871632	0.877258
1070.19	217.23	723.493	1.4792	0.300252
1094.05	451.87	723.493	1.51218	0.624567
1238.9	814.36	723.493	1.71239	1.12559
816.155	209.37	723.493	1.12808	0.289388
818.11		723.493	1.13078
589.03		723.493	0.814147
629.035		723.493	0.869441
350.38		723.493	0.484289
472.54		723.493	0.653137
723.493		723.493
407.348	401.719	358.776	1.13538	1.11969
310.205	226.938	358.776
358.776		358.776
	692.23	699.433	0.864844	0.989702
604.9	622.12	699.433	0.922104	0.889464
644.95	592.81	699.433	1.05856	0.847558
740.39	658.39	699.433	1.22494	0.94132
856.76	492.9	699.433	0.929558	0.704714
650.163	402.22	699.433		0.575066
699.433	530.44	699.433		0.758386
	493.73	699.433		0.705901
	552.67	699.433		0.790169
	621.95	699.433		0.889221
	408.58	699.433		0.584159
663.97	840.54	638.525	1.03985	1.31638
541.02	493.38	638.525	0.847297	0.772687
797.54	509.69	638.525	1.24903	0.79823
551.57	628.25	638.525	0.863819	0.983908
638.525	515.91	638.525		0.807971
	1167.84	638.525		1.82897
	624.55	638.525		0.978114
	732.71	638.525		1.1475
	525.34	638.525		0.82274
417.602	397.452	548.835	0.760888	0.724174
647.512	359.3	548.835	1.17979	0.654659
711.658	465.977	548.835	1.29667	0.849029
418.568	411.566	548.835	0.762648	0.74989
548.835	516.099	548.835		0.940354
528.496	395.141	471.83	1.1201	0.837464
402.206	258.44	471.83	0.852438	0.547739
388.903	317.771	471.83	0.824243	0.673486
601.049	378.893	471.83	1.27387	0.803028
410.476	400.769	471.83	0.869965	0.849392
618.866	429.853	471.83	1.31163	0.911033
611.286	394.437	471.83	1.29556	0.835972
437.992	329.87	471.83	0.928283	0.699128
390.357		471.83	0.827325
341.531		471.83	0.723843
458.972		471.83	0.972748
471.83		471.83
498.628	393.682	546.483	0.912431	0.720392
530.233	303.578	546.483	0.970264	0.555512
694.564	336.937	546.483	1.27097	0.616555
462.507	290.807	546.483	0.846334	0.532143
546.483	353.252	546.483		0.64641
792.49	280.35	683.19	1.15998	0.410354
573.89	310.87	683.19	0.840015	0.455027
683.19	262.03	683.19		0.383539
	684.315	683.19		1.00165
386.12	275.51	370.79	1.04134	0.743035
355.46	317.33	370.79	0.958656	0.855821
370.79	161.355

## Sheet: dendrites_120μm
mCherry	mCherry-2A-Cre	Average	mCherry	mCherry-2A-Cre
408.35	157.74	443.235	0.921295	0.355883
368.09	88.26	443.235	0.830462	0.199127
408.35	311.71	443.235	0.921295	0.703261
586.38		443.235	1.32296
499.04		443.235	1.1259
389.2		443.235	0.87809
443.235		443.235	1
642.55	460.84	697.143	0.921691	0.661041
1066.35	510.19	697.143	1.5296	0.73183
607.4	523.09	697.143	0.871271	0.750334
472.27	457.94	697.143	0.677437	0.656881
697.143	862.81	697.143	1	1.23764
	535.87	697.143		0.768666
		697.143
719.96	383.57	708.737	1.01584	0.541202
651.92	601.92	708.737	0.919834	0.849286
754.33	558.3	708.737	1.06433	0.78774
708.737	547.25	708.737	1	0.772149
	354.19	708.737		0.499748
	488.04	708.737		0.688606
	596.52	708.737		0.841667
598.63	492.54	614.5	0.974174	0.80153
675.41	512.98	614.5	1.09912	0.834793
569.46	607.69	614.5	0.926705	0.988918
614.5	896.33	614.5	1	1.45863
	764.49	614.5		1.24408
	944.47	614.5		1.53697
784.088	269.054	651.23	1.20401	0.413148
527.356		651.23	0.809785
642.245		651.23	0.986204
651.23		651.23	1
442.821	309.106	447.408	0.989748	0.690882
545.042	515.917	447.408	1.21822	1.15313
486.146	326.327	447.408	1.08658	0.729373
427.054		447.408	0.954508
447.482		447.408	1.00017
335.901		447.408	0.750772
447.408		447.408	1
744.152	374.29	612.548	1.21485	0.611037
480.945	347.586	612.548	0.785154	0.567442
612.548	333.619	612.548	1	0.544641
481.25	318.25	481.25	1	0.661299
	314.46	481.25		0.653423
	409.36	481.25		0.850618
	318.25	481.25		0.661299
666.34	309.97	666.34	1	0.465183
	393.51	666.34		0.590554
481.25	419.64	389.385	1.23592	1.0777
297.52	253.29	389.385	0.764077	0.650487
389.385
362.154	326.323	378.405	0.957055	0.862365
394.736	478.715	378.405	1.04316	1.26509
378.324	261.616	378.405	0.999787	0.691366
378.405	354.584	378.405		0.93705
	401.399	378.405		1.06077
470.82	325.5	596.595	0.789179	0.545596
571.57	412.3	596.595	0.958054	0.691089
615.71	135.52	596.595	1.03204	0.227156
628.76	374.05	596.595	1.05391	0.626975
591.42	505.27	596.595	0.991326	0.846923
422.12		596.595	0.707549
850.99		596.595	1.42641
788.33		596.595	1.32138
476.9		596.595	0.79937
549.33		596.595	0.920775
596.595
610.7	280.99	574.71	1.06262	0.488925
804.28	309.42	574.71	1.39945	0.538393
916.09	281.55	574.71	1.594	0.489899
422.91		574.71	0.735867
324.08		574.71	0.563902
477.11		574.71	0.830175
467.8		574.71	0.813976
574.71		574.71
1314.04	210.9	874.523	1.50258	0.24116
860.43	432.6	874.523	0.983885	0.494669
847.03	569.3	874.523	0.968562	0.650983
416.82	598.19	874.523	0.476625	0.684018
912.51	810.82	874.523	1.04344	0.927157
896.31	678.23	874.523	1.02491	0.775542
874.523		874.523
939.53	956.13	686.224	1.36913	1.39332
345.57	460.84	686.224	0.503582	0.671559
1066.35	510.19	686.224	1.55394	0.743474
607.4	417.25	686.224	0.885134	0.608038
472.27	362.81	686.224	0.688216	0.528705
686.224	563.74	686.224		0.82151
	523.09	686.224		0.762273
	457.94	686.224		0.667333
	862.81	686.224		1.25733
	535.87	686.224		0.780897

## Sheet: Ankyrin-G
mCherry	mCherry-2A-Cre	Average	mCherry	mCherry-2A-Cre
935.652	603.005	770.314	1.21464	0.782804
876.774	1031.23	770.314	1.1382	1.33871
802.903	374.888	770.314	1.04231	0.486669
657.595	455.59	770.314	0.853671	0.591434
751.587	702.313	770.314	0.975689	0.911723
620.277	657.132	770.314	0.805226	0.85307
408.952	603.4	770.314	0.53089	0.783317
784.227	488.935	770.314	1.01806	0.634722
1424.42	715.488	770.314	1.84914	0.928827
707.811	474.226	770.314	0.918861	0.615627
783.395	346.246	770.314	1.01698	0.449487
1116.33	865.712	770.314	1.44919	1.12384
1220.73	436.397	770.314	1.58472	0.566518
1037.67	978.976	770.314	1.34707	1.27088
591.781	566.252	770.314	0.768234	0.735093
678.992	978.976	770.314	0.881448	1.27088
752.203	566.252	770.314	0.976489	0.735093
348.392	637.942	770.314	0.452273	0.828159
674.359	779.943	770.314	0.875434	1.0125
448.109	530.586	770.314	0.581723	0.688792
530.323	378.275	770.314	0.688451	0.491066
888.885	555.381	770.314	1.15393	0.72098
493.583	721.15	770.314	0.640756	0.936177
803.172	623.659	770.314	1.04266	0.809617
919.727		770.314	1.19396
770.314		770.314	1

## Sheet: Fig 4-s1H normalize
Soma_mCherry	Soma_mCherry_2A-Cre	AIS_mCherry	AIS_mCherry_2A-Cre	30μm_mCherry	30_mCherry_2A-Cre	60μm_mCherry	60_mCherry_2A-Cre	90μm_mCherry	90_mCherry_2A-Cre	120μm_mCherry	120_mCherry_2A-Cre
0.641067	0.535523	1.21464	0.782804	0.76309	0.825312	1.49908	0.237009	0.957545	0.514026	0.921295	0.355883
1.21102	0.162685	1.1382	1.33871	0.712168	0.965433	0.348771	0.904954	1.30286	0.892083	0.830462	0.199127
0.792003	0.441149	1.04231	0.486669	1.25229	1.33347	1.02158	0.430067	1.03893	1.32593	0.921295	0.703261
1.53018	0.261288	0.853671	0.591434	1.17295	1.07878	1.4138	0.376655	1.23287	0.1446	1.32296	0.661041
1.53358	0.95059	0.975689	0.911723	1.51739	0.944363	0.659877	0.64013	0.757771	0.798681	1.1259	0.73183
1.19524	0.933059	0.805226	0.85307	0.79924	0.693497	1.06237	0.839999	0.869628	0.479915	0.878089	0.750334
0.5875	1.01858	0.53089	0.783317	0.739225	0.791573	0.994523	0.74003	1.01977	0.242062	0.921691	0.656881
0.986327	0.685542	1.01806	0.634722	1.04365	0.437388	1.07192	0.981633	0.820624	0.699767	1.5296	1.23764
0.515522	0.685542	1.84914	0.928827	1.06956	0.918663	0.613311	0.288176	1.09955	0.877258	0.871271	0.768666
1.00756	0.880071	0.91886	0.615627	0.679324	1.4287	1.17266	0.419462	0.821252	0.300252	0.677437	0.541202
1.23319	0.581008	1.01698	0.449487	1.13279	0.910878	0.737621	0.783825	0.94296	0.624567	1.01584	0.849286
1.07747	0.679228	1.44919	1.12384	0.628362	0.510914	0.918007	0.462732	0.480972	1.12559	0.919834	0.78774
0.839781	0.745159	1.58472	0.566518	0.989313	0.53394	0.960716	0.134345	0.871632	0.289388	1.06433	0.772149
0.826791	0.772449	1.34707	1.27088	0.74652	0.860828	1.1662	0.956412	1.4792	0.989702	0.989748	0.499748
1.0305	0.702445	0.768234	0.735093	1.25473	0.630384	1.66349	1.69882	1.51218	0.889464	1.21822	0.688606
0.858568	0.713151	0.881448	1.27088	1.63617	1.03043	1.4657	1.2035	1.71239	0.847558	1.08658	0.841667
1.13369	0.855674	0.976489	0.735093	1.36772	0.730852	1.04936	0.447654	1.12808	0.94132	0.954508	0.690882
0.72274	1.13056	0.452273	0.828159	1.24543	0.885158	1.01131	0.62261	1.13078	0.704714	1.00017	1.15313
0.854895	0.762662	0.875434	1.0125	1.28878	0.443241	1.10702	0.532751	0.814147	0.575066	0.750772	0.729373
1.1504	0.659571	0.581723	0.688792	0.618092	0.710121	0.951964	0.626505	0.869441	0.758386	1.23592	1.0777
0.826832	0.48095	0.688451	0.491066	1.15502	0.635596	0.592252	0.629948	0.484289	0.705901	0.764077	0.650487
0.95695	0.353188	1.15393	0.72098	1.18525	0.58863	0.867728	0.324617	0.653137	0.790169	0.957055	0.862365
1.32001	0.646908	0.640756	0.936177	0.82962	0.784612	0.720906	0.456324	0.864844	0.889221	1.04316	1.26509
1.10881	0.521139	1.04266	0.809617	0.56274	0.702564	0.92985	0.42407	0.922104	0.584159	0.999787	0.691366
1.05937	0.594035	1.19396		0.610575	0.777949	1.07448	1.55874	1.05856	1.31638	0.789179	0.93705
0.980713	0.923202			1.89012	0.79565	0.870132	0.932218	1.22494	0.772687	0.958054	1.06077
0.868335	1.06358			0.863306	0.702503	1.24554	0.794271	0.929558	0.79823	1.03204	0.545596
1.28798	0.907012			0.854462	1.00707	0.874571	1.16395	1.03985	0.983908	1.05391	0.691089
1.07305	0.908327			0.847484	0.712977	0.906641	0.925175	0.847297	0.807971	0.991326	0.227156
0.788844	0.53539			0.62261	0.61643	1.02864	1.62238	1.24903	1.82897	0.707549	0.626975
0.820317	0.531731			0.922021	0.521334	1.14161	1.45166	0.863819	0.978114	1.42641	0.846923
1.14203	0.385325			0.769515	0.919349	0.852603	1.50037	0.760888	1.1475	1.32138	0.488925
0.883415	0.580332			1.05116	0.334396	0.981363	1.62582	1.17979	0.82274	0.79937	0.538393
1.06312	0.7139			1.35171	0.353075	1.49863	0.634528	1.29667	0.724174	0.920775	0.489899
1.0922	0.849714			0.792731	0.396436	0.835166	0.825612	0.762648	0.654659	1.06262	0.24116
1.42069	0.714766			1.01273	0.525683	0.690628	0.894499	1.1201	0.849029	1.39945	0.494669
0.86674	1.15535			1.14349	0.540843	0.723871	0.740522	0.852438	0.74989	1.594	0.650983
0.915405	0.610931			0.878666	0.558506	0.96098	0.628158	0.824243	0.940354	0.735867	0.684018
0.797163	0.82664			0.428629	0.742899	0.847016	0.726577	1.27387	0.837464	0.563902	0.927157
	0.648665			1.13458	0.477393	0.896986	0.863245	0.869965	0.547739	0.830175	0.775542
	0.91521			1.16248	0.358166	1.46081	0.738865	1.31163	0.673486	0.813976
	0.917267			1.55591	0.74633	0.902979	0.968728	1.29556	0.803028	1.50258
	1.03447			1.31992	0.516493	0.626253	0.879114	0.928283	0.849392	0.983885
	0.656876			1.25678	0.300157	1.24601	1.18537	0.827325	0.911033	0.968562
	0.737749			0.535191	0.805523	1.14645	0.760433	0.723843	0.835972	0.476625
	0.738129			0.606515	0.897275	1.20666	1.04808	0.972748	0.699128	1.04344
				0.676854	0.799101	0.840296	0.927313			1.02491
				1.41636	0.534874	1.15635	0.849644
				1.05486	0.779402	1.05316	0.789525
				0.752534	0.985221	0.919163
				1.01587	0.75997	1.013
				1.06558
				1.12505
				0.8929
