# Supplementary material for: Endophilin A1 facilitates organization of the GABAergic postsynaptic machinery to maintain excitation-inhibition balance
Source: eLife. 2025 Oct 2;13:RP102792. doi: 10.7554/eLife.102792 (PMC12490859; doi:10.7554/eLife.102792)
Supplement: Figure 4—source data 3. [file elife-102792-fig4-data3.xlsx]

## Sheet: Fig 4B
#Term	Database	ID	Input number	Background number	P-Value	Corrected P-Value	Input	Hyperlink
Synaptic vesicle cycle	KEGG PATHWAY	mmu04721	16	77	1.29632e-16	8.42609e-15	Snap25|Slc6a1|Stx1b|Atp6v1a|Atp6v1d|Syt1|Atp6v1e1|Atp6v1h|Nsf|Stxbp1|Dnm1|Atp6v0a1|Ap2a1|Atp6v1b2|Atp6v0d1|Atp6v1g2	http://www.genome.jp/kegg-bin/show_pathway?mmu04721/mmu:11972%09red/mmu:11973%09red/mmu:73834%09red/mmu:11964%09red/mmu:11975%09red/mmu:11771%09red/mmu:18195%09red/mmu:232333%09red/mmu:20910%09red/mmu:20614%09red/mmu:56216%09red/mmu:20979%09red/mmu:66237%09red/mmu:13429%09red/mmu:108664%09red/mmu:11966%09red
Glutamatergic synapse	KEGG PATHWAY	mmu04724	17	114	1.95891e-15	1.11738e-13	Dlg4|Gnao1|Prkcb|Gnb1|Adcy9|Prkcg|Gnb2|Grin2b|Glul|Dlgap1|Homer1|Ppp3ca|Ppp3cb|Shank3|Shank2|Shank1|Gnai1	http://www.genome.jp/kegg-bin/show_pathway?mmu04724/mmu:243961%09red/mmu:18751%09red/mmu:14645%09red/mmu:18752%09red/mmu:14677%09red/mmu:14688%09red/mmu:224997%09red/mmu:14681%09red/mmu:14812%09red/mmu:13385%09red/mmu:14693%09red/mmu:19055%09red/mmu:19056%09red/mmu:11515%09red/mmu:58234%09red/mmu:26556%09red/mmu:210274%09red
Dopaminergic synapse	KEGG PATHWAY	mmu04728	16	135	3.33222e-13	1.36964e-11	Ppp2r1a|Prkcb|Ppp1cb|Ppp1cc|Ppp1ca|Gnao1|Camk2g|Gnb1|Camk2a|Prkcg|Gnb2|Grin2b|Camk2b|Ppp3ca|Ppp3cb|Gnai1	http://www.genome.jp/kegg-bin/show_pathway?mmu04728/mmu:18751%09red/mmu:19055%09red/mmu:18752%09red/mmu:14677%09red/mmu:14688%09red/mmu:12322%09red/mmu:14681%09red/mmu:12325%09red/mmu:14812%09red/mmu:12323%09red/mmu:14693%09red/mmu:19046%09red/mmu:19045%09red/mmu:51792%09red/mmu:434233%09red/mmu:19056%09red
Regulation of actin cytoskeleton	KEGG PATHWAY	mmu04810	18	217	2.94373e-12	1.12709e-10	Myh10|Arpc4|Actn1|Myh9|Ppp1cb|Actg1|Actn4|Arpc3|Arpc1a|Arpc5l|Ppp1ca|Ppp1cc|Ppp1r12a|Cfl1|Baiap2|Actb|Gsn|Myl9	http://www.genome.jp/kegg-bin/show_pathway?mmu04810/mmu:12631%09red/mmu:108100%09red/mmu:109711%09red/mmu:68089%09red/mmu:74192%09red/mmu:17931%09red/mmu:11461%09red/mmu:19046%09red/mmu:56378%09red/mmu:17886%09red/mmu:98932%09red/mmu:56443%09red/mmu:11465%09red/mmu:434233%09red/mmu:227753%09red/mmu:60595%09red/mmu:77579%09red/mmu:19045%09red
cAMP signaling pathway	KEGG PATHWAY	mmu04024	17	213	2.1048e-11	7.00347e-10	Rapgef4|Atp1a2|Ppp1cb|Ppp1cc|Ppp1ca|Camk2a|Camk2g|Atp1b2|Adcy9|Camk2b|Atp1b1|Grin2b|Atp1a3|Ppp1r12a|Atp1a1|Gnai1|Myl9	http://www.genome.jp/kegg-bin/show_pathway?mmu04024/mmu:12323%09red/mmu:98660%09red/mmu:12322%09red/mmu:12325%09red/mmu:14812%09red/mmu:17931%09red/mmu:232975%09red/mmu:19046%09red/mmu:56508%09red/mmu:98932%09red/mmu:11515%09red/mmu:434233%09red/mmu:14677%09red/mmu:11931%09red/mmu:11932%09red/mmu:19045%09red/mmu:11928%09red
Long-term potentiation	KEGG PATHWAY	mmu04720	11	67	7.47983e-11	2.3229e-09	Camk2g|Ppp1cb|Ppp1cc|Ppp1ca|Prkcb|Camk2a|Prkcg|Grin2b|Camk2b|Ppp3ca|Ppp3cb	http://www.genome.jp/kegg-bin/show_pathway?mmu04720/mmu:18751%09red/mmu:19055%09red/mmu:18752%09red/mmu:12322%09red/mmu:12325%09red/mmu:14812%09red/mmu:12323%09red/mmu:19046%09red/mmu:19045%09red/mmu:434233%09red/mmu:19056%09red
GABAergic synapse	KEGG PATHWAY	mmu04727	12	90	9.03455e-11	2.74474e-09	Slc6a1|Gnao1|Prkcb|Gnb1|Adcy9|Nsf|Gnb2|Glul|Prkcg|Gnai1|Gabra1|Gphn	http://www.genome.jp/kegg-bin/show_pathway?mmu04727/mmu:18751%09red/mmu:14394%09red/mmu:14645%09red/mmu:18752%09red/mmu:14677%09red/mmu:18195%09red/mmu:232333%09red/mmu:14693%09red/mmu:14688%09red/mmu:268566%09red/mmu:11515%09red/mmu:14681%09red
Endocytosis	KEGG PATHWAY	mmu04144	16	270	4.78706e-09	9.5185e-08	Capza2|Capza1|Arpc5l|Capzb|Arpc3|Arpc1a|Hspa8|Arpc4|Dnm1|Iqsec1|Ap2a1|Iqsec2|Sh3gl1|Sh3kbp1|Sh3gl3|Sh3gl2	http://www.genome.jp/kegg-bin/show_pathway?mmu04144/mmu:74192%09red/mmu:68089%09red/mmu:12340%09red/mmu:11771%09red/mmu:12343%09red/mmu:12345%09red/mmu:245666%09red/mmu:13429%09red/mmu:56378%09red/mmu:15481%09red/mmu:56443%09red/mmu:20408%09red/mmu:58194%09red/mmu:20404%09red/mmu:20405%09red/mmu:232227%09red
Calcium signaling pathway	KEGG PATHWAY	mmu04020	12	194	2.65423e-07	3.9045e-06	Nos1|Prkcb|Camk2g|Adcy9|Prkcg|Camk2a|Camk2b|Ppp3ca|Vdac3|Vdac2|Vdac1|Ppp3cb	http://www.genome.jp/kegg-bin/show_pathway?mmu04020/mmu:18751%09red/mmu:19056%09red/mmu:22334%09red/mmu:18752%09red/mmu:22333%09red/mmu:12325%09red/mmu:12322%09red/mmu:12323%09red/mmu:19055%09red/mmu:22335%09red/mmu:11515%09red/mmu:18125%09red
Long-term depression	KEGG PATHWAY	mmu04730	6	61	2.47698e-05	0.000211072	Nos1|Ppp2r1a|Gnao1|Prkcb|Prkcg|Gnai1	http://www.genome.jp/kegg-bin/show_pathway?mmu04730/mmu:18751%09red/mmu:18752%09red/mmu:14677%09red/mmu:14681%09red/mmu:51792%09red/mmu:18125%09red
