# Supplementary material for: Endophilin A1 facilitates organization of the GABAergic postsynaptic machinery to maintain excitation-inhibition balance
Source: eLife. 2025 Oct 2;13:RP102792. doi: 10.7554/eLife.102792 (PMC12490859; doi:10.7554/eLife.102792)
Supplement: Figure 4—source data 4. [file elife-102792-fig4-data4.xlsx]

## Sheet: Fig 4H Raw data
GFP + Vector				GFP + Vector
Source	mean intensity	mean intensity of per neuron		Source	number	length	number of per 10 μm	number of per neuron
MAX_2022.12.05-GFP-1-P-1.nd2:0001-0511-0503	427.887			MAX_2022.12.05-GFP-1-P-1.nd2	33	31.567	10.454
MAX_2022.12.05-GFP-1-S-1.nd2:0002-0512-0743	665.838	546.862		MAX_2022.12.05-GFP-1-S-1.nd2	47	31.26	15.0352	12.7446
MAX_2022.12.05-GFP-2-S-1.nd2:0001-0512-0750	503.215			MAX_2022.12.05-GFP-2-P-1.nd2	62	31.551	19.6507
MAX_2022.12.05-GFP-2-S1-1.nd2:0001-0348-0512	491.335			MAX_2022.12.05-GFP-2-S-1.nd2	69	67.368	10.2423
MAX_2022.12.05-GFP-2-T-1.nd2:0001-0490-0512	417.602	470.717		MAX_2022.12.05-GFP-2-S1-1.nd2	79	53.466	14.7757
MAX_2022.12.05-GFP-3-F-1.nd2:0001-0512-0521	784.088			MAX_2022.12.05-GFP-2-T-1.nd2	16	31.583	5.06602	12.4337
MAX_2022.12.05-GFP-3-P-1.nd2:0001-0467-0512	533.436			MAX_2022.12.05-GFP-3-F-1.nd2	41	31.862	12.868
MAX_2022.12.05-GFP-3-P1-1.nd2:0001-0512-0301	643.292			MAX_2022.12.05-GFP-3-P-1.nd2	79	31.429	25.136
MAX_2022.12.05-GFP-3-P2-1.nd2:0001-0517-0416	576.748			MAX_2022.12.05-GFP-3-P1-1.nd2	57	50.787	11.2233
MAX_2022.12.05-GFP-3-S-1.nd2:0001-0512-0492	572.373			MAX_2022.12.05-GFP-3-P2-1.nd2	49	30.709	15.9562
MAX_2022.12.05-GFP-3-T-1.nd2:0001-0512-0514	647.512	626.241		MAX_2022.12.05-GFP-3-S-1.nd2	38	31.373	12.1123
MAX_2022.12.05-GFP-4-P-1.nd2:0001-0512-0464	751.613			MAX_2022.12.05-GFP-3-T-1.nd2	39	31.465	12.3947	14.9484
MAX_2022.12.05-GFP-4-S-1.nd2:0001-0437-0504	979.9			MAX_2022.12.05-GFP-4-P-1.nd2	59	31.467	18.7498
MAX_2022.12.05-GFP-4-S1-1.nd2:0001-0512-0540	768.226			MAX_2022.12.05-GFP-4-S-1.nd2	74
MAX_2022.12.05-GFP-4-T-1.nd2:0001-0242-0512	711.658	802.849		MAX_2022.12.05-GFP-4-S1-1.nd2	31	31.521	9.83471	13.6928
MAX_2022.12.05-GFP-5-P-1.nd2:0001-0512-0509	440.796	440.796		MAX_2022.12.05-GFP-4-T-1.nd2	41	32.816	12.4939
MAX_2022.12.05-GFP-6-P-1-1.nd2:0001-0683-0512	563.128			MAX_2022.12.05-GFP-5-P-1.nd2	41	31.852	12.872
MAX_2022.12.05-GFP-6-S-1.nd2:0001-0363-0512	487.105	525.116		MAX_2022.12.05-GFP-6-P-1-1.nd2	34	31.557	10.7742
MAX_2022.12.05-GFP-7-P-1.nd2:0001-0514-0512	635.835	635.835		MAX_2022.12.05-GFP-6-S-1.nd2	29	37.381	7.75795	10.9986
MAX_2022.12.05-GFP-8-F-1.nd2:0001-0512-0433	527.356			MAX_2022.12.05-GFP-7-P-1.nd2	40	31.771	12.5901
MAX_2022.12.05-GFP-8-P-1.nd2:0001-0512-0472	511.343			MAX_2022.12.05-GFP-8-F-1.nd2	20	32.364	6.17971
MAX_2022.12.05-GFP-8-P1-1.nd2:0001-0512-0701	465.817			MAX_2022.12.05-GFP-8-P-1.nd2	42	32.325	12.993
MAX_2022.12.05-GFP-8-S-1.nd2:0001-0482-0526	402.804			MAX_2022.12.05-GFP-8-P1-1.nd2	48	49.225	9.75114
MAX_2022.12.05-GFP-8-T-1.nd2:0001-0512-0514	418.568	465.178		MAX_2022.12.05-GFP-8-S-1.nd2	13	32.539	3.99521
MAX_2022.12.05-GFP-9-F-1.nd2:0001-0527-0512	642.245	642.245		MAX_2022.12.05-GFP-8-T-1.nd2	16	32.747	4.88594	7.56101
				MAX_2022.12.05-GFP-9-F-1.nd2	35	31.405	11.1447	11.1447
				GFP-2A-Cre + Vector
Source	mean intensity	mean intensity of per neuron		Source	number	length	number of per 10 μm	number of per neuron
MAX_2022.12.05-CRE-V-1-P-1-1.nd2:0001-0512-0546	390.659			MAX_2022.12.05-CRE-V-1-P-1-1.nd2	45	31.467	14.3007
MAX_2022.12.05-CRE-V-1-S-1.nd2:0001-0511-0449	370.084			MAX_2022.12.05-CRE-V-1-S-1.nd2	15	32.082	4.67552
MAX_2022.12.05-CRE-V-1-T-1-1.nd2:0001-0450-0512	397.452	386.065		MAX_2022.12.05-CRE-V-1-T-1-1.nd2	19	32.026	5.93268	8.30296
MAX_2022.12.05-CRE-V-2-F-1.nd2:0001-0512-0568	269.054			MAX_2022.12.05-CRE-V-2-F-1.nd2	26	35.562	7.31117
MAX_2022.12.05-CRE-V-2-P-1.nd2:0001-0512-0512	396.999			MAX_2022.12.05-CRE-V-2-P-1.nd2	32	31.626	10.1183
MAX_2022.12.05-CRE-V-2-P1-1.nd2:0001-0512-0453	468.154			MAX_2022.12.05-CRE-V-2-P1-1.nd2	51	33.009	15.4503
MAX_2022.12.05-CRE-V-2-S-1.nd2:0001-0514-0512	422.831			MAX_2022.12.05-CRE-V-2-S-1.nd2	27	32.028	8.43012
MAX_2022.12.05-CRE-V-2-S1-1.nd2:0001-0511-0670	540.234	419.454		MAX_2022.12.05-CRE-V-2-S1-1.nd2	23	32.652	7.04398	9.67077
MAX_2022.12.05-CRE-V-3-P-1.nd2:0001-0512-0499	442.419			MAX_2022.12.05-CRE-V-3-P-1.nd2	27	32.277	8.36509
MAX_2022.12.05-CRE-V-3-S-1.nd2:0001-0462-0512	521.71			MAX_2022.12.05-CRE-V-3-S-1.nd2	45	31.444	14.3112
MAX_2022.12.05-CRE-V-3-T-1.nd2:0001-0521-0512	362.125			MAX_2022.12.05-CRE-V-3-T-1.nd2	33	31.688	10.414
MAX_2022.12.05-CRE-V-3-T1-1.nd2:0001-0512-0477	356.474	420.682		MAX_2022.12.05-CRE-V-3-T1-1.nd2	16	33.366	4.7953	9.4714
MAX_2022.12.05-CRE-V-4-P-1.nd2:0001-0512-0607	390.625			MAX_2022.12.05-CRE-V-4-P-1.nd2	38	32.161	11.8156
MAX_2022.12.05-CRE-V-4-S-1.nd2:0001-0510-0207	431.904			MAX_2022.12.05-CRE-V-4-S-1.nd2	28	61.47	4.55507
MAX_2022.12.05-CRE-V-4-T-1.nd2:0001-0512-0192	465.977	429.502		MAX_2022.12.05-CRE-V-4-T-1.nd2	29	33.029	8.78016	8.38359
MAX_2022.12.05-CRE-V-6-1-1.nd2:0001-0512-0514	411.566			MAX_2022.12.05-CRE-V-6-1-1.nd2	15	32.242	4.65232
MAX_2022.12.05-CRE-V-6-P-1.nd2:0002-0512-0538	559.981			MAX_2022.12.05-CRE-V-6-P-1.nd2	43	31.71	13.5604
MAX_2022.12.05-CRE-V-6-S-1.nd2:0001-0239-0512	366.369	445.972		MAX_2022.12.05-CRE-V-6-S-1.nd2	10	31.196	3.20554	7.13942
MAX_2022.12.05-CRE-V-7-P-1.nd2:0001-0494-0512	396.449			MAX_2022.12.05-CRE-V-7-P-1.nd2	21	31.531	6.66011
MAX_2022.12.05-CRE-V-7-S-1.nd2:0001-0463-0512	464.275			MAX_2022.12.05-CRE-V-7-S-1.nd2	12	32.188	3.7281
MAX_2022.12.05-CRE-V-7-S1-1.nd2:0001-0487-0706	383.267			MAX_2022.12.05-CRE-V-7-S1-1.nd2	10	38.561	2.59329
MAX_2022.12.05-CRE-V-7-T-1.nd2:0001-0344-0512	516.099	440.022		MAX_2022.12.05-CRE-V-7-T-1.nd2	15	31.525	4.75813	4.43491
MAX_2022.12.05-CRE-V-8-P-1.nd2:0001-0476-0512	342.764	342.764		MAX_2022.12.05-CRE-V-8-P-1.nd2	35	30.992	11.2932	11.2932
GFP-2A-Cre + EndoA1				GFP-2A-Cre + EndoA1
Source	mean intensity	mean intensity of per neuron		Source	number	length	number of per 10 μm	number of per neuron
MAX_2022.12.05-CRE-A1-1-p-1.nd2:0001-0485-0512	469			MAX_2022.12.05-CRE-A1-1-p-1.nd2	53	31.428	16.8639
MAX_2022.12.05-CRE-A1-1-S-1.nd2:0001-0613-0513	485.274			MAX_2022.12.05-CRE-A1-1-S-1.nd2	51	63.76	7.99875
MAX_2022.12.05-CRE-A1-1-T-1.nd2:0001-0542-0512	532.844	495.706		MAX_2022.12.05-CRE-A1-1-T-1.nd2	49	31.57	15.5211	13.4613
MAX_2022.12.05-CRE-A1-2-P-1.nd2:0001-0512-0549	480.593			MAX_2022.12.05-CRE-A1-2-P-1.nd2	45	51.889	8.67236
MAX_2022.12.05-CRE-A1-2-S-1.nd2:0001-0512-0447	582.307	531.45		MAX_2022.12.05-CRE-A1-2-S-1.nd2	37	57.063	6.48406	7.57821
MAX_2022.12.05-CRE-A1-3.P-1.nd2:0001-0512-0449	479.617			MAX_2022.12.05-CRE-A1-3.P-1.nd2	32	32.211	9.93449
MAX_2022.12.05-CRE-A1-3.S-1.nd2:0001-0465-0512	383.295	431.456		MAX_2022.12.05-CRE-A1-3.S-1.nd2	32	32.432	9.8668	9.90065
MAX_2022.12.05-CRE-A1-4.P-1.nd2:0001-0512-0505	363.384			MAX_2022.12.05-CRE-A1-4.P-1.nd2	40	31.615	12.6522
MAX_2022.12.05-CRE-A1-4.P1-1.nd2:0001-0512-0468	453.37	408.377		MAX_2022.12.05-CRE-A1-4.P1-1.nd2	45	31.343	14.3573	13.5047
MAX_2022.12.05-CRE-A1-5.P-1.nd2:0001-0405-0512	542.613			MAX_2022.12.05-CRE-A1-5.P-1.nd2	36	32.2	11.1801
MAX_2022.12.05-CRE-A1-5.S-1.nd2:0001-0512-0274	499.465			MAX_2022.12.05-CRE-A1-5.S-1.nd2	34	32.452	10.477
MAX_2022.12.05-CRE-A1-5TS-1.nd2:0001-0463-0512	428.592	490.223		MAX_2022.12.05-CRE-A1-5TS-1.nd2	29	33.472	8.66396	10.107
MAX_2022.12.05-CRE-A1-6.P1-1.nd2:0001-0488-0515	549.256			MAX_2022.12.05-CRE-A1-6.P1-1.nd2	42	31.738	13.2333
MAX_2022.12.05-CRE-A1-6.P2-1.nd2:0001-0512-0632	463.69			MAX_2022.12.05-CRE-A1-6.P2-1.nd2	26	31.57	8.23567
MAX_2022.12.05-CRE-A1-6.S-1.nd2:0001-0512-0598	654.075			MAX_2022.12.05-CRE-A1-6.S-1.nd2	33	31.209	10.5739
MAX_2022.12.05-CRE-A1-6.T-1.nd2:0001-0512-0485	493.576	555.674		MAX_2022.12.05-CRE-A1-6.T-1.nd2	30	31.504	9.5226	10.3914
MAX_2022.12.05-CRE-A1-7.P-1.nd2:0001-0512-0488	435.241	435.241		MAX_2022.12.05-CRE-A1-7.P-1.nd2	33	64.741	5.09723	5.09723
MAX_2022.12.05-CRE-A1-9.P1-1.nd2:0001-0512-0434	444.266			MAX_2022.12.05-CRE-A1-9.P1-1.nd2	54	81.276	6.64403
MAX_2022.12.05-CRE-A1-9.S-1.nd2:0001-0512-0777	506.848			MAX_2022.12.05-CRE-A1-9.S-1.nd2	21	32.501	6.46134
MAX_2022.12.05-CRE-A1-9.T-1.nd2:0001-0512-0685	487.207	479.44		MAX_2022.12.05-CRE-A1-9.T-1.nd2	19	31.648	6.00354	6.36964
MAX_2022.12.05-CRE-A1-10.P-1.nd2:0001-0528-0503	751.986			MAX_2022.12.05-CRE-A1-10.P-1.nd2	22	31.532	6.97704
MAX_2022.12.05-CRE-A1-10.S-1.nd2:0001-0467-0512	644.421			MAX_2022.12.05-CRE-A1-10.S-1.nd2	29	31.755	9.13242
MAX_2022.12.05-CRE-A1-10.T-1.nd2:0001-0356-0512	618.598	671.668		MAX_2022.12.05-CRE-A1-10.T-1.nd2	25	34.914	7.16045	7.75664
MAX_2022.12.05-CRE-A1-11.P-1.nd2:0001-0433-0512	645.083			MAX_2022.12.05-CRE-A1-11.P-1.nd2	51	31.825	16.0251
MAX_2022.12.05-CRE-A1-11.S-1.nd2:0001-0275-0512	652.759			MAX_2022.12.05-CRE-A1-11.S-1.nd2	54	33.107	16.3107
MAX_2022.12.05-CRE-A1-11.T-1.nd2:0001-0469-0512	509.156	602.333		MAX_2022.12.05-CRE-A1-11.T-1.nd2	19	31.792	5.97635	12.7707
GFP-2A-Cre + EndoA2				GFP-2A-Cre + EndoA2
Source	mean intensity	mean intensity of per neuron		Source	number	length	number of per 10 μm	number of per neuron
MAX_2022.12.05-CRE-A2-1.F-1.nd2:0001-0456-0512	541.183			MAX_2022.12.05-CRE-A2-1.F-1.nd2	15	31.638	4.74113
MAX_2022.12.05-CRE-A2-1.P-1.nd2:0001-0512-0522	511.789			MAX_2022.12.05-CRE-A2-1.P-1.nd2	16	44.15	3.62401
MAX_2022.12.05-CRE-A2-1.s-1.nd2:0001-0512-0531	421.222			MAX_2022.12.05-CRE-A2-1.s-1.nd2	36	48.93	7.35745
MAX_2022.12.05-CRE-A2-1.S1-1.nd2:0001-0479-0512	593.038			MAX_2022.12.05-CRE-A2-1.S1-1.nd2	10	32.263	3.09953
MAX_2022.12.05-CRE-A2-1.T-1.nd2:0001-0512-0510	423.811	498.209		MAX_2022.12.05-CRE-A2-1.T-1.nd2	13	31.881	4.07766	4.57996
MAX_2022.12.05-CRE-A2-2.P-1.nd2:0001-0509-0512	651.358			MAX_2022.12.05-CRE-A2-2.P-1.nd2	22	31.603	6.96136
MAX_2022.12.05-CRE-A2-2.S-1.nd2:0001-0512-0512	567.251			MAX_2022.12.05-CRE-A2-2.S-1.nd2	18	71.962	2.50132
MAX_2022.12.05-CRE-A2-2.T-1.nd2:0001-0512-0509	372.483	530.364		MAX_2022.12.05-CRE-A2-2.T-1.nd2	26	33.766	7.70005	5.72091
MAX_2022.12.05-CRE-A2-3.P-1.nd2:0001-0512-0527	716.419			MAX_2022.12.05-CRE-A2-3.P-1.nd2	43	32.602	13.1894
MAX_2022.12.05-CRE-A2-3.S-1.nd2:0001-0571-0512	649.389	682.904		MAX_2022.12.05-CRE-A2-3.S-1.nd2	18	37.458	4.80538
MAX_2022.12.05-CRE-A2-4.P-1.nd2:0001-0512-0728	701.547			MAX_2022.12.05-CRE-A2-4.P-1.nd2	51	31.593	16.1428
MAX_2022.12.05-CRE-A2-4.S-1.nd2:0001-0438-0512	579.35	640.448		MAX_2022.12.05-CRE-A2-4.S-1.nd2	17	31.357	5.42144	9.88975
MAX_2022.12.05-CRE-A2-5.P-1.nd2:0001-0512-0501	494.076			MAX_2022.12.05-CRE-A2-5.P-1.nd2	28	31.503	8.88804
MAX_2022.12.05-CRE-A2-5.P1-1.nd2:0001-0512-0528	575.158			MAX_2022.12.05-CRE-A2-5.P1-1.nd2	25	32.007	7.81079
MAX_2022.12.05-CRE-A2-5.S-1.nd2:0001-0512-0450	439.797			MAX_2022.12.05-CRE-A2-5.S-1.nd2	25	52.559	4.75656
MAX_2022.12.05-CRE-A2-5.S1-1.nd2:0001-0448-0512	485.084			MAX_2022.12.05-CRE-A2-5.S1-1.nd2	28	31.167	8.98386
MAX_2022.12.05-CRE-A2-5.T-1.nd2:0001-0489-0512	410.469	480.917		MAX_2022.12.05-CRE-A2-5.T-1.nd2	18	32.042	5.61763	7.21138
MAX_2022.12.05-CRE-A2-6.P-1.nd2:0001-0581-0512	504.376			MAX_2022.12.05-CRE-A2-6.P-1.nd2	28	31.728	8.82501
MAX_2022.12.05-CRE-A2-6.P1-1.nd2:0001-0512-0462	716.942			MAX_2022.12.05-CRE-A2-6.P1-1.nd2	33	45.116	7.31448
MAX_2022.12.05-CRE-A2-6.S-1.nd2:0001-0527-0512	355.322			MAX_2022.12.05-CRE-A2-6.S-1-1.nd2	13	31.474	4.13039
MAX_2022.12.05-CRE-A2-6.T-1.nd2:0001-0527-0512	384.253	490.223		MAX_2022.12.05-CRE-A2-6.T-1.nd2	18	41.791	4.30715	6.14426
MAX_2022.12.05-CRE-A2-7.P-1.nd2:0001-0512-0543	414.05			MAX_2022.12.05-CRE-A2-7.P-1.nd2	12	31.164	3.8506
MAX_2022.12.05-CRE-A2-7.S-1.nd2:0001-0512-0560	315.463			MAX_2022.12.05-CRE-A2-7.S-1-1.nd2	8	32.724	2.44469
MAX_2022.12.05-CRE-A2-7.S1-1.nd2:0001-0521-0556	273.829			MAX_2022.12.05-CRE-A2-7.S1-1.nd2	10	31.136	3.21172
MAX_2022.12.05-CRE-A2-7.T-1.nd2:0001-0512-0449	339.096	335.61		MAX_2022.12.05-CRE-A2-7.T-1.nd2	9	33.207	2.71027	3.05432
MAX_2022.12.05-CRE-A2-8-T-1.nd2:0001-0498-0512	607.905			MAX_2022.12.05-CRE-A2-8-T-1.nd2	22	31.304	7.02786
MAX_2022.12.05-CRE-A2-8=P-1.nd2:0001-0512-0523	682.848			MAX_2022.12.05-CRE-A2-8=P-1.nd2	17	40.921	4.15435
MAX_2022.12.05-CRE-A2-8=S-1.nd2:0001-0512-0517	766.173	685.642		MAX_2022.12.05-CRE-A2-8=S-1.nd2	23	31.966	7.19514	6.12578
MAX_2022.12.05-CRE-A2-9-P-1.nd2:0001-0512-0496	610.101			MAX_2022.12.05-CRE-A2-9-P-1.nd2	20	31.844	6.28062
MAX_2022.12.05-CRE-A2-9-P1-1.nd2:0001-0338-0512	409.888			MAX_2022.12.05-CRE-A2-9-P1-1.nd2	29	48.298	6.00439	6.1425
MAX_2022.12.05-CRE-A2-9-S-1.nd2:0001-0476-0512	462.125	494.038		MAX_2022.12.05-CRE-A2-9-S-1.nd2	14	31.999	4.37514
MAX_2022.12.05-CRE-A2-10-F-1.nd2:0001-0498-0512	470.561			MAX_2022.12.05-CRE-A2-10-F-1.nd2	8	32.813	2.43806
MAX_2022.12.05-CRE-A2-10-P-1.nd2:0001-0453-0512	557.061			MAX_2022.12.05-CRE-A2-10-P-1.nd2	37	46.261	7.9981
MAX_2022.12.05-CRE-A2-10-TS1-1.nd2:0001-0475-0512	381.248			MAX_2022.12.05-CRE-A2-10-TS1-1.nd2	9	33.044	2.72364
MAX_2022.12.05-CRE-A2-10-T-1.nd2:0001-0512-0430	880.652			MAX_2022.12.05-CRE-A2-10-T-1.nd2	16	32.451	4.93051
MAX_2022.12.05-CRE-A2-10-TS1-1.nd2:0001-0475-0512	381.248	534.154		MAX_2022.12.05-CRE-A2-10-TS1-1.nd2	12	33.059	3.62987	4.34404
MAX_2022.12.05-CRE-A2-11-P-1.nd2:0001-0512-0546	610.415			MAX_2022.12.05-CRE-A2-11-P-1-1.nd2	25	31.829	7.85447
MAX_2022.12.05-CRE-A2-11-S-1.nd2:0001-0341-0512	644.839			MAX_2022.12.05-CRE-A2-11-S-1.nd2	43	46.804	9.18725
MAX_2022.12.05-CRE-A2-11-T-1.nd2:0001-0570-0512	461.631	572.295		MAX_2022.12.05-CRE-A2-11-T-1.nd2	18	32.218	5.58694	7.54289
MAX_2022.12.05-CRE-A2-12-P-1.nd2:0001-0459-0514	635.511			MAX_2022.12.05-CRE-A2-12-P-1.nd2	16	31.89	5.01725
MAX_2022.12.05-CRE-A2-12-S-1.nd2:0001-0505-0512	604.339	619.925		MAX_2022.12.05-CRE-A2-12-S-1.nd2	12	35.274	3.40194	4.20959
MAX_2022.12.05-CRE-A2-13-P-1.nd2:0001-0512-0520	547.817			MAX_2022.12.05-CRE-A2-13-P-1.nd2	14	32.424	4.31779	4.31779
MAX_2022.12.05-CRE-A2-14-S-1.nd2:0001-0512-0509	497.072			MAX_2022.12.05-CRE-A2-14-S-1.nd2	16	32.16	4.97512
MAX_2022.12.05-CRE-A2-14-T-1.nd2:0001-0512-0519	642.486	569.779		MAX_2022.12.05-CRE-A2-14-T-1.nd2	29	31.409	9.23302	7.10407
GFP + Vector				GFP + Vector
Source	mean intensity			Source	number	length	number of per 10 μm	number of per neuron
MAX_2023.03.07-GFP-1-P-1.nd2:0002-0512-0525	247.864	mean intensity of per neuron		MAX_2023.03.07-GFP-1-P-1.nd2	11	31.296	3.51483
MAX_2023.03.07-GFP-1-P1-1.nd2:0002-0512-0417	322.286			MAX_2023.03.07-GFP-1-P1-1.nd2	36	32.343	11.1307
MAX_2023.03.07-GFP-1-S-1.nd2:0002-0512-0484	303.568	291.239		MAX_2023.03.07-GFP-1-S-1.nd2	12	32.959	3.64089	6.09547
MAX_2023.03.07-GFP-2-F-1.nd2:0002-0512-0560	465.305			MAX_2023.03.07-GFP-2-F-1.nd2	12	31.967	3.75387
MAX_2023.03.07-GFP-2-F1-1.nd2:0002-0512-0432	420.337			MAX_2023.03.07-GFP-2-F1-1.nd2	13	31.565	4.11849
MAX_2023.03.07-GFP-2-P-1.nd2:0002-0512-0644	395.373			MAX_2023.03.07-GFP-2-P-1.nd2	40	57.385	6.97046
MAX_2023.03.07-GFP-2-S-1.nd2:0002-0512-0485	403.004			MAX_2023.03.07-GFP-2-S-1.nd2	11	31.69	3.47113
MAX_2023.03.07-GFP-2-T-1.nd2:0002-0512-0514	528.496	419.82		MAX_2023.03.07-GFP-2-T-1.nd2	9	31.627	2.84567	4.23192
MAX_2023.03.07-GFP-3-P-1.nd2:0002-0512-0509	306.405			MAX_2023.03.07-GFP-3-P-1.nd2	12	31.656	3.79075
MAX_2023.03.07-GFP-3-S-1.nd2:0002-0512-0506	355.211			MAX_2023.03.07-GFP-3-S-1.nd2	6	31.407	1.9104
MAX_2023.03.07-GFP-3-T-1.nd2:0002-0512-0527	402.206	354.607		MAX_2023.03.07-GFP-3-T-1.nd2	15	30.784	4.87266	3.5246
MAX_2023.03.07-GFP-4-P-1.nd2:0002-0512-0482	434.435			MAX_2023.03.07-GFP-4-P-1.nd2	14	31.8	4.40252
MAX_2023.03.07-GFP-4-S-1.nd2:0002-0512-0416	376.167			MAX_2023.03.07-GFP-4-S-1.nd2	14	31.181	4.48991
MAX_2023.03.07-GFP-4-T-1.nd2:0002-0530-0512	388.903	399.835		MAX_2023.03.07-GFP-4-T-1.nd2	8	30.988	2.58164	3.82469
MAX_2023.03.07-GFP-5-F-1.nd2:0002-0502-0512	545.042			MAX_2023.03.07-GFP-5-F-1.nd2	17	31.331	5.42594
MAX_2023.03.07-GFP-5-P-1.nd2:0002-0530-0512	388.869			MAX_2023.03.07-GFP-5-P-1.nd2	15	31.476	4.76554
MAX_2023.03.07-GFP-5-S-1.nd2:0002-0512-0598	612.615			MAX_2023.03.07-GFP-5-S-1.nd2	16	31.172	5.13281
MAX_2023.03.07-GFP-5-T-1.nd2:0002-0512-0408	601.049	536.894		MAX_2023.03.07-GFP-5-T-1.nd2	26	67.612	3.84547	4.79244
MAX_2023.03.07-GFP-6-F-1.nd2:0002-0512-0531	276.291			MAX_2023.03.07-GFP-6-F-1.nd2	12	31.613	3.79591
MAX_2023.03.07-GFP-6-P-1.nd2:0002-0464-0512	482.284			MAX_2023.03.07-GFP-6-P-1.nd2	35	31.083	11.2602
MAX_2023.03.07-GFP-6-S-1.nd2:0002-0350-0512	378.68			MAX_2023.03.07-GFP-6-S-1.nd2	18	35.984	5.00222
MAX_2023.03.07-GFP-6-T-1.nd2:0002-0669-0448	410.476	386.933		MAX_2023.03.07-GFP-6-T-1.nd2	14	37.608	3.72261	5.94523
MAX_2023.03.07-GFP-7-F1-1.nd2:0002-0512-0502	486.146			MAX_2023.03.07-GFP-7-F1-1.nd2	9	47.254	1.9046
MAX_2023.03.07-GFP-7-P-1.nd2:0002-0512-0622	456.303			MAX_2023.03.07-GFP-7-P-1.nd2	26	33.425	7.77861
MAX_2023.03.07-GFP-7-S-1.nd2:0002-0514-0359	262.63			MAX_2023.03.07-GFP-7-S-1.nd2	7	28.276	2.4756
MAX_2023.03.07-GFP-7-S1-1.nd2:0002-0537-0512	522.538			MAX_2023.03.07-GFP-7-S1-1.nd2	30	31.608	9.49127
MAX_2023.03.07-GFP-7-T-1.nd2:0002-0457-0512	618.866			MAX_2023.03.07-GFP-7-T-1.nd2	17	31.326	5.4268
MAX_2023.03.07-GFP-7-T1-1.nd2:0002-0512-0562	611.286	492.962		MAX_2023.03.07-GFP-7-T1-1.nd2	22	31.827	6.91237	5.66487
MAX_2023.03.07-GFP-8-P-1.nd2:0002-0512-0493	404.529			MAX_2023.03.07-GFP-8-P-1.nd2	19	32.119	5.9155
MAX_2023.03.07-GFP-8-S-1.nd2:0002-0473-0512	480.784			MAX_2023.03.07-GFP-8-S-1.nd2	6	31.205	1.92277
MAX_2023.03.07-GFP-8-T-1.nd2:0002-0493-0512	437.992	441.102		MAX_2023.03.07-GFP-8-T-1.nd2	14	32.258	4.34001	4.05943
MAX_2023.03.07-GFP-9-P-1.nd2:0002-0512-0666	476.399			MAX_2023.03.07-GFP-9-P-1.nd2	24	31.664	7.57959
MAX_2023.03.07-GFP-9-P1-1.nd2:0002-0512-0501	433.515			MAX_2023.03.07-GFP-9-P1-1.nd2	28	33.048	8.47252
MAX_2023.03.07-GFP-9-P2-1.nd2:0002-0512-0424	452.292			MAX_2023.03.07-GFP-9-P2-1.nd2	24	41.82	5.73888
MAX_2023.03.07-GFP-9-S-1.nd2:0002-0512-0543	506.036	467.06		MAX_2023.03.07-GFP-9-S-1.nd2	17	31.698	5.36311	6.78853
MAX_2023.03.07-GFP-10-F-1.nd2:0002-0512-0423	427.054			MAX_2023.03.07-GFP-10-F-1.nd2	12	31.26	3.83877
MAX_2023.03.07-GFP-10-P-1.nd2:0002-0512-0418	356.709			MAX_2023.03.07-GFP-10-P-1.nd2	9	31.289	2.87641
MAX_2023.03.07-GFP-10-S-1.nd2:0002-0512-0654	352.393			MAX_2023.03.07-GFP-10-S-1.nd2	22	30.952	7.10778
MAX_2023.03.07-GFP-10-T-1.nd2:0002-0460-0512	390.357	381.628		MAX_2023.03.07-GFP-10-T-1.nd2	12	33.248	3.60924	4.35805
MAX_2023.03.07-GFP-11-P-1.nd2:0002-0547-0504	397.978			MAX_2023.03.07-GFP-11-P-1.nd2	15	31.916	4.69984
MAX_2023.03.07-GFP-11-S-1.nd2:0002-0512-0511	484.936	441.457		MAX_2023.03.07-GFP-11-S-1.nd2	17	32.235	5.27377	4.9868
MAX_2023.03.07-GFP-12-P-1.nd2:0002-0787-0512	538.75			MAX_2023.03.07-GFP-12-P-1.nd2	25	31.734	7.87799
MAX_2023.03.07-GFP-12-P1-1.nd2:0002-0494-0512	489.706			MAX_2023.03.07-GFP-12-P1-1.nd2	37	31.557	11.7248
MAX_2023.03.07-GFP-12-S-1.nd2:0002-0512-0582	441.663			MAX_2023.03.07-GFP-12-S-1.nd2	25	46.721	5.35091
MAX_2023.03.07-GFP-12-T-1.nd2:0002-0431-0607	341.531	452.913		MAX_2023.03.07-GFP-12-T-1.nd2	10	25.062	3.9901	7.23595
MAX_2023.03.07-GFP-13-F-1.nd2:0002-0512-0679	447.482			MAX_2023.03.07-GFP-13-F-1.nd2	11	31.278	3.51685
MAX_2023.03.07-GFP-13-P-1.nd2:0002-0512-0752	419.081			MAX_2023.03.07-GFP-13-P-1.nd2	23	37.525	6.12925
MAX_2023.03.07-GFP-13-S-1.nd2:0002-0512-0628	385.467			MAX_2023.03.07-GFP-13-S-1.nd2	10	32.323	3.09377
MAX_2023.03.07-GFP-13-T-1.nd2:0004-0436-0512	458.972	427.75		MAX_2023.03.07-GFP-13-T-1.nd2	17	31.091	5.46782	4.55192
MAX_2023.03.07-GFP-14-F-1.nd2:0002-0512-0571	335.901			MAX_2023.03.07-GFP-14-F-1.nd2	8	31.608	2.531
MAX_2023.03.07-GFP-14-P-1.nd2:0002-0430-0512	360.388			MAX_2023.03.07-GFP-14-P-1.nd2	27	31.287	8.62978
MAX_2023.03.07-GFP-14-S-1.nd2:0002-0444-0512	424.821	373.703		MAX_2023.03.07-GFP-14-S-1.nd2	17	31.594	5.38077	5.51385
GFP-2A-Cre + Vector				GFP-2A-Cre + Vector
Source	mean intensity	mean intensity of per neuron		Source	number	length	number of per 10 μm	number of per neuron
MAX_2023.03.07-cre-v-1-P-1.nd2:0002-0470-0512	305.618			MAX_2023.03.07-cre-v-1-P-1.nd2	7
MAX_2023.03.07-cre-v-1-P1-1.nd2:0002-0509-0547	368.82			MAX_2023.03.07-cre-v-1-P1-1.nd2	14	32.996	4.24294
MAX_2023.03.07-cre-v-1-S-1.nd2:0002-0488-0510	362.017	345.485		MAX_2023.03.07-cre-v-1-S-1.nd2	12	31.489	3.81085	4.0269
MAX_2023.03.07-cre-v-2-P-1.nd2:0002-0463-0512	311.884			MAX_2023.03.07-cre-v-2-P-1.nd2	4	32.556	1.22865
MAX_2023.03.07-cre-v-2-S-1.nd2:0002-0485-0512	263.044			MAX_2023.03.07-cre-v-2-S-1-1.nd2	4	31.39	1.27429
MAX_2023.03.07-cre-v-2-S1-1.nd2:0002-0502-0512	356.668	310.532		MAX_2023.03.07-cre-v-2-S1-1.nd2	15	32.018	4.68486	2.39594
MAX_2023.03.07-cre-v-3-F-1.nd2:0002-0520-0441	309.106			MAX_2023.03.07-cre-v-3-F-1.nd2	3	25.387	1.18171
MAX_2023.03.07-cre-v-3-P-1.nd2:0002-0512-0556	404.833			MAX_2023.03.07-cre-v-3-P-1.nd2	17	31.104	5.46553
MAX_2023.03.07-cre-v-3-P1-1.nd2:0002-0512-0504	528.761			MAX_2023.03.07-cre-v-3-P1-1.nd2	31	31.495	9.84283
MAX_2023.03.07-cre-v-3-P2-1.nd2:0002-0663-0512	419.894			MAX_2023.03.07-cre-v-3-T-1.nd2	19	60.992	3.11516	4.90131
MAX_2023.03.07-cre-v-3-T-1.nd2:0002-0512-0551	395.141	411.547		MAX_2023.03.07-cre-v-4-P-1.nd2	21	31.075	6.75784
MAX_2023.03.07-cre-v-4-P-1.nd2:0002-0512-0518	420.465			MAX_2023.03.07-cre-v-4-S-1.nd2	14	33.368	4.19564
MAX_2023.03.07-cre-v-4-S-1.nd2:0002-0512-0354	406.253			MAX_2023.03.07-cre-v-4-T-1.nd2	7	32.841	2.13148	4.36165
MAX_2023.03.07-cre-v-4-T-1.nd2:0002-0316-0512	258.44	361.719		MAX_2023.03.07-cre-v-5-P-1.nd2	16	31.654	5.05465
MAX_2023.03.07-cre-v-5-P-1.nd2:0002-0512-0489	337.433			MAX_2023.03.07-cre-v-5-S-1.nd2	17	32.556	5.22177
MAX_2023.03.07-cre-v-5-S-1.nd2:0002-0481-0511	368.672			MAX_2023.03.07-cre-v-5-T-1.nd2	11	32.894	3.34407	4.54017
MAX_2023.03.07-cre-v-5-T-1.nd2:0002-0410-0512	317.771	341.292		MAX_2023.03.07-cre-v-6-P-1.nd2	39	31.524	12.3715
MAX_2023.03.07-cre-v-6-P-1.nd2:0002-0512-0564	520.477			MAX_2023.03.07-cre-v-6-S-1.nd2	17	52.667	3.22783
MAX_2023.03.07-cre-v-6-S-1.nd2:0002-0512-0561	497.107			MAX_2023.03.07-cre-v-6-T-1.nd2	10	33.813	2.95744	6.1856
MAX_2023.03.07-cre-v-6-T-1.nd2:0002-0428-0512	378.893	465.492		MAX_2023.03.07-cre-v-7-P-1.nd2	24	53.299	4.5029
MAX_2023.03.07-cre-v-7-P-1.nd2:0002-0512-0362	441.933			MAX_2023.03.07-cre-v-7-S-1.nd2	8	32.159	2.48764	6.99054
MAX_2023.03.07-cre-v-7-S-1.nd2:0002-0512-0603	318.901	380.417		MAX_2023.03.07-cre-v-8-P-1.nd2	9	33.251	2.70669
MAX_2023.03.07-cre-v-8-P-1.nd2:0002-0524-0512	343.724			MAX_2023.03.07-cre-v-8-S-1.nd2	14	31.004	4.51555
MAX_2023.03.07-cre-v-8-S-1.nd2:0002-0478-0512	439.53			MAX_2023.03.07-cre-v-8-T-1.nd2	19	30.903	6.14827	4.45683
MAX_2023.03.07-cre-v-8-T-1.nd2:0002-0512-0631	400.769	394.674		MAX_2023.03.07-cre-v-9-F-1.nd2	9	32.014	2.81127
MAX_2023.03.07-cre-v-9-F-1.nd2:0002-0436-0512	515.917			MAX_2023.03.07-cre-v-9-P-1.nd2	7	31.355	2.2325
MAX_2023.03.07-cre-v-9-P-1.nd2:0002-0211-0512	381.688			MAX_2023.03.07-cre-v-9-P1-1.nd2	21	31.978	6.56701
MAX_2023.03.07-cre-v-9-P1-1.nd2:0002-0512-0563	475.695			MAX_2023.03.07-cre-v-9-S-1.nd2	8	31.436	2.54485
MAX_2023.03.07-cre-v-9-S-1.nd2:0002-0344-0512	388.885			MAX_2023.03.07-cre-v-9-T-1.nd2	10	32.757	3.05278	3.44168
MAX_2023.03.07-cre-v-9-T-1.nd2:0002-0405-0512	429.853	438.408		MAX_2023.03.07-cre-v-10-A`-1.nd2	13	32.068	4.05389
MAX_2023.03.07-cre-v-10-A`-1.nd2:0002-0680-0512	440.598			MAX_2023.03.07-cre-v-10-P-1.nd2	12	31.967	3.75387
MAX_2023.03.07-cre-v-10-P-1.nd2:0002-0512-0576	365.119			MAX_2023.03.07-cre-v-10-S-1.nd2	7	33.44	2.0933
MAX_2023.03.07-cre-v-10-S-1.nd2:0002-0442-0512	356.313			MAX_2023.03.07-cre-v-10-T1-2-1.nd2	16	32.096	4.98504	3.72153
MAX_2023.03.07-cre-v-10-T1-2-1.nd2:0001-0512-0684	394.437	389.117		MAX_2023.03.07-cre-v-11-F-1.nd2	10	32.992	3.03104
MAX_2023.03.07-cre-v-11-F-1.nd2:0002-0521-0512	326.327			MAX_2023.03.07-cre-v-11-P-1.nd2	9	32.078	2.80566
MAX_2023.03.07-cre-v-11-P-1.nd2:0002-0536-0512	332.519			MAX_2023.03.07-cre-v-11-S-1.nd2	12	56.548	2.12209
MAX_2023.03.07-cre-v-11-S-1.nd2:0002-0512-0705	331.101			MAX_2023.03.07-cre-v-11-T-1.nd2	11	31.733	3.46642	2.8563
MAX_2023.03.07-cre-v-11-T-1.nd2:0002-0512-0701	329.87	329.954
GFP-2A-Cre + EndoA1				GFP-2A-Cre + EndoA1
Source	mean intensity	mean intensity of per neuron		Source	number	length	number of per 10 μm	number of per neuron
MAX_2023.03.07-A1-1-P-1.nd2:0002-0429-0512	373.543			MAX_2023.03.07-A1-1-P-1.nd2			11.7911
MAX_2023.03.07-A1-1-S-1.nd2:0002-0617-0512	401.269			MAX_2023.03.07-A1-1-S-1.nd2	23	31.772	7.23908
MAX_2023.03.07-A1-1-T-1.nd2:0002-0512-0640	372.316	382.376		MAX_2023.03.07-A1-1-T-1.nd2	24	31.243	7.68172	8.90398
MAX_2023.03.07-A1-2-F-1.nd2:0002-0480-0512	326.937			MAX_2023.03.07-A1-2-F-1.nd2	19	31.894	5.95723
MAX_2023.03.07-A1-2-P-1.nd2:0001-0692-0512	538.609			MAX_2023.03.07-A1-2-P-1.nd2	27	31.548	8.55839
MAX_2023.03.07-A1-2-P1-1.nd2:0002-0512-0525	406.126			MAX_2023.03.07-A1-2-P1-1.nd2	30	55.305	5.42446
MAX_2023.03.07-A1-2-S-1.nd2:0002-0512-0689	441.674	428.337		MAX_2023.03.07-A1-2-S-1.nd2	25	31.368	7.96991	6.9775
MAX_2023.03.07-A1-3-F-1.nd2:0002-0512-0733	556.251			MAX_2023.03.07-A1-3-F-1.nd2	21	31.272	6.71527
MAX_2023.03.07-A1-3-P-1.nd2:0002-0620-0512	631.907			MAX_2023.03.07-A1-3-P-1.nd2	25	32.356	7.72654
MAX_2023.03.07-A1-3-S-1.nd2:0002-0454-0512	585.029			MAX_2023.03.07-A1-3-S-1.nd2	14	32.62	4.29185
MAX_2023.03.07-A1-3-S1-1.nd2:0002-0512-0599	522.128			MAX_2023.03.07-A1-3-S1-1.nd2	11	30.734	3.5791
MAX_2023.03.07-A1-3-T-1.nd2:0002-0512-0735	491.623	557.388		MAX_2023.03.07-A1-3-T-1.nd2	10	31.713	3.15328	5.09321
MAX_2023.03.07-A1-4-P-1.nd2:0002-0499-0512	752.799			MAX_2023.03.07-A1-4-P-1.nd2	25	31.87	7.84437
MAX_2023.03.07-A1-4-S-1.nd2:0002-0483-0512	695.233			MAX_2023.03.07-A1-4-S-1.nd2	16	31.431	5.09052
MAX_2023.03.07-A1-4-T-1.nd2:0002-0512-0492	657.361	701.798		MAX_2023.03.07-A1-4-T-1.nd2	22	31.327	7.0227	6.65253
MAX_2023.03.07-A1-5-P-1.nd2:0002-0363-0512	401.474			MAX_2023.03.07-A1-5-P-1.nd2	27	32.913	8.20345
MAX_2023.03.07-A1-6-P-1.nd2:0002-0504-0512	417.059			MAX_2023.03.07-A1-6-P-1.nd2	11	31.157	3.53051
MAX_2023.03.07-A1-6-S-1.nd2:0002-0572-0512	414.097			MAX_2023.03.07-A1-6-S-1.nd2	21	31.99	6.56455
MAX_2023.03.07-A1-6-T-1.nd2:0002-0496-0512	432.946	416.394		MAX_2023.03.07-A1-6-T-1.nd2	10	31.532	3.17138	5.36747
MAX_2023.03.07-A1-7-P-1.nd2:0002-0552-0512	529.354			MAX_2023.03.07-A1-7-P-1.nd2	23	31.513	7.29858
MAX_2023.03.07-A1-7-P1-1.nd2:0002-0512-0459	447.852			MAX_2023.03.07-A1-7-P1-1.nd2	13	31.564	4.11862
MAX_2023.03.07-A1-7-S-1.nd2:0002-0589-0512	585.518			MAX_2023.03.07-A1-7-S-1.nd2	20	31.785	6.29228
MAX_2023.03.07-A1-7-T-1.nd2:0002-0647-0512	517.145	519.967		MAX_2023.03.07-A1-7-T-1.nd2	35	65.104	5.37601	5.77137
MAX_2023.03.07-A1-8-P-1.nd2:0002-0512-0627	413.867			MAX_2023.03.07-A1-8-P-1.nd2	18	31.188	5.77145
MAX_2023.03.07-A1-9-P-1.nd2:0002-0569-0512	406.844			MAX_2023.03.07-A1-9-P-1.nd2	17	31.345	5.42351
MAX_2023.03.07-A1-9-S-1.nd2:0002-0523-0519	504.631			MAX_2023.03.07-A1-9-S-1.nd2	25	51.495	4.85484
MAX_2023.03.07-A1-9-T-1.nd2:0002-0544-0512	414.984	435.082		MAX_2023.03.07-A1-9-T-1.nd2	6	31.095	1.92957	5.77145
MAX_2023.03.07-A1-10-F-1.nd2:0002-0512-0659	393.386			MAX_2023.03.07-A1-10-F-1.nd2	21	31.436	6.68024
MAX_2023.03.07-A1-10-S-1.nd2:0002-0512-0604	427.744			MAX_2023.03.07-A1-10-S-1.nd2	44	46.261	9.51125
MAX_2023.03.07-A1-10-T-1.nd2:0002-0512-0525	400.857	407.329		MAX_2023.03.07-A1-10-T-1.nd2	12	31.202	3.84591	6.67913
MAX_2023.03.07-A1-11-P-1.nd2:0002-0512-0472	612.391			MAX_2023.03.07-A1-11-P-1.nd2	35	33.251	10.526
MAX_2023.03.07-A1-11-S-1.nd2:0002-0512-0449	537.371			MAX_2023.03.07-A1-11-S-1.nd2	21	32.001	6.56229
MAX_2023.03.07-A1-11-T-1.nd2:0002-0512-0436	502.534	550.765		MAX_2023.03.07-A1-11-T-1.nd2	13	31.265	4.158	7.0821
GFP-2A-Cre + EndoA2				GFP-2A-Cre + EndoA2
Source	mean intensity	mean intensity of per neuron		Source	number	length	number of per 10 μm	number of per neuron
MAX_2023.03.07-A2-1-P-1-1.nd2:0001-0512-0668	268.315			MAX_2023.03.07-A2-1-P-1-1.nd2	8	31.615	2.53044
MAX_2023.03.07-A2-1-P1-1.nd2:0002-0512-0755	325.556			MAX_2023.03.07-A2-1-P1-1.nd2	25	58.259	4.29118
MAX_2023.03.07-A2-1-S-1.nd2:0002-0602-0512	344.211			MAX_2023.03.07-A2-1-S-1.nd2	19	31.886	5.95873
MAX_2023.03.07-A2-1-T-1.nd2:0002-0512-0604	281.167			MAX_2023.03.07-A2-1-T-1.nd2	6	31.86	1.88324
MAX_2023.03.07-A2-1-T1-1.nd2:0002-0535-0512	284.052	300.66		MAX_2023.03.07-A2-1-T1-1.nd2	6	30.944	1.93899	3.32052
MAX_2023.03.07-A2-2-P-1.nd2:0001-0512-0515	334.823			MAX_2023.03.07-A2-2-P-1.nd2	13	31.681	4.10341
MAX_2023.03.07-A2-2-S-1.nd2:0002-0512-0750	291.831			MAX_2023.03.07-A2-2-S-1.nd2	8	35.741	2.23833
MAX_2023.03.07-A2-2-S1-1.nd2:0002-0456-0512	253.114			MAX_2023.03.07-A2-2-S1-1.nd2	8	32.371	2.47135
MAX_2023.03.07-A2-2-ST-1.nd2:0002-0701-0487	339.217	304.746		MAX_2023.03.07-A2-2-ST-1.nd2	16	36.562	4.37613	3.2973
MAX_2023.03.07-A2-3-P-1.nd2:0001-0621-0512	225.919			MAX_2023.03.07-A2-3-P-1.nd2	3	31.278	0.959141
MAX_2023.03.07-A2-4-F-1.nd2:0002-0512-0640	345.873			MAX_2023.03.07-A2-4-F-1.nd2	11	48.643	2.26137
MAX_2023.03.07-A2-4-P-1.nd2:0002-0495-0508	369.02			MAX_2023.03.07-A2-4-P-1.nd2	12	30.857	3.88891
MAX_2023.03.07-A2-4-S-1.nd2:0002-0570-0512	394.803			MAX_2023.03.07-A2-4-S-1.nd2	18	30.891	5.82694
MAX_2023.03.07-A2-4-S1-1.nd2:0002-0512-0450	357.715			MAX_2023.03.07-A2-4-S1-1.nd2	30	31.246	9.60123
MAX_2023.03.07-A2-4-T-1.nd2:0001-0512-0667	360.835	342.361		MAX_2023.03.07-A2-4-T-1.nd2	23	31.738	7.24683	4.96407
MAX_2023.03.07-A2-5-P-1.nd2:0002-0450-0512	395.544			MAX_2023.03.07-A2-5-P-1.nd2	43	31.372	13.7065
MAX_2023.03.07-A2-5-P1-1.nd2:0002-0508-0512	368.951	382.248		MAX_2023.03.07-A2-5-P1-1.nd2	23	31.451	7.31296	10.5097
MAX_2023.03.07-A2-6-F-1.nd2:0002-0510-0512	338.175			MAX_2023.03.07-A2-6-F-1.nd2	13	30.4	4.27632
MAX_2023.03.07-A2-6-P-1-1.nd2:0002-0512-0685	320.021			MAX_2023.03.07-A2-6-P-1-1.nd2	26	31.961	8.13491
MAX_2023.03.07-A2-6-S-1.nd2:0002-0512-0728	353.636			MAX_2023.03.07-A2-6-S-1.nd2	13	32.669	3.97931
MAX_2023.03.07-A2-6-S1-1.nd2:0002-0643-0512	339.525			MAX_2023.03.07-A2-6-S1-1.nd2	4	33.404	1.19746
MAX_2023.03.07-A2-6-T-1.nd2:0002-0514-0685	286.066	327.485		MAX_2023.03.07-A2-6-T-1.nd2	12	32.061	3.74287	4.26617
MAX_2023.03.07-A2-7-F-1.nd2:0002-0512-0542	364.526			MAX_2023.03.07-A2-7-F-1.nd2	15	31.844	4.71046
MAX_2023.03.07-A2-7-P-1.nd2:0002-0580-0512	401.319			MAX_2023.03.07-A2-7-P-1.nd2	19	32.108	5.91753
MAX_2023.03.07-A2-7-P1-1.nd2:0002-0325-0512	390.495			MAX_2023.03.07-A2-7-P1-1.nd2	29	32.737	8.85848
MAX_2023.03.07-A2-7-S-1.nd2:0002-0460-0512	367.694			MAX_2023.03.07-A2-7-S-1.nd2	22	31.645	6.95213
MAX_2023.03.07-A2-7-S1-1.nd2:0002-0512-0613	384.834			MAX_2023.03.07-A2-7-S1-1.nd2	14	31.192	4.48833
MAX_2023.03.07-A2-7-T-1.nd2:0002-0447-0512	324.757			MAX_2023.03.07-A2-7-T-1.nd2	8	31.553	2.53542
MAX_2023.03.07-A2-7-T1-1.nd2:0002-0512-0474	403.509	376.733		MAX_2023.03.07-A2-7-T1-1.nd2	14	30.53	4.58565	5.43543
MAX_2023.03.07-A2-8-P-1.nd2:0002-0458-0512	328.029			MAX_2023.03.07-A2-8-P-1.nd2	29	32.718	8.86362
MAX_2023.03.07-A2-8-S-1.nd2:0002-0551-0512	291.382	309.705		MAX_2023.03.07-A2-8-S-1.nd2	9	32.354	2.78173	5.82267
MAX_2023.03.07-A2-9-P-1.nd2:0001-0425-0512	237.707			MAX_2023.03.07-A2-9-P-1.nd2	4	31.174	1.28312
MAX_2023.03.07-A2-9-P1-1.nd2:0001-0587-0512	174.363			MAX_2023.03.07-A2-9-P1-1.nd2	8	54.196	1.47612
MAX_2023.03.07-A2-9-S-1.nd2:0001-0595-0512	260.126	224.065		MAX_2023.03.07-A2-9-S-1.nd2	14	63.137	2.2174	1.65888
MAX_2023.03.07-A2-10-P-1.nd2:0002-0508-0512	241.961			MAX_2023.03.07-A2-10-P-1.nd2	3	31.439	0.954229
MAX_2023.03.07-A2-10-S-1.nd2:0002-0524-0512	143.445			MAX_2023.03.07-A2-10-S-1.nd2	1	31.457	0.317894
MAX_2023.03.07-A2-10-T-1.nd2:0002-0540-0512	176.871	187.426		MAX_2023.03.07-A2-10-T-1.nd2	2	32.081	0.623422	0.631848
MAX_2023.03.07-A2-11-F-1.nd2:0002-0598-0512	423.706			MAX_2023.03.07-A2-11-F-1.nd2	13	31.978	4.06529
MAX_2023.03.07-A2-11-F1-1.nd2:0002-0512-0682	521.8			MAX_2023.03.07-A2-11-F1-1.nd2	9	30.88	2.91451
MAX_2023.03.07-A2-11-P1-1.nd2:0001-0583-0512	417.779			MAX_2023.03.07-A2-11-P1-1.nd2	17	31.982	5.31549
MAX_2023.03.07-A2-11-S-1.nd2:0001-0454-0512	528.324			MAX_2023.03.07-A2-11-S-1.nd2	12	30.959	3.87609
MAX_2023.03.07-A2-11-T-1.nd2:0001-0303-0512	602.373	498.796		MAX_2023.03.07-A2-11-T-1.nd2	11	31.097	3.53732	3.94174
MAX_2023.03.07-A2-12-P-1.nd2:0001-0512-0569	380.788			MAX_2023.03.07-A2-12-P-1.nd2	15	31.516	4.75949
MAX_2023.03.07-A2-12-S-1.nd2:0002-0535-0512	303.385	342.087		MAX_2023.03.07-A2-12-S-1.nd2	13	31.573	4.11744	4.43846
				MAX_2023.03.07-A2-12-T-2-1.nd2	9
GFP-2A-Cre + EndoA3				GFP-2A-Cre + EndoA3
Source	mean intensity	mean intensity of per neuron		Source	number	length	number of per 10 μm	number of per neuron
MAX_2023.03.07-A3-1-F-1.nd2:0002-0435-0512	385.399			MAX_2023.03.07-A3-1-F-1.nd2	4	31.495	1.27004
MAX_2023.03.07-A3-1-P-1.nd2:0002-0615-0512	250.311			MAX_2023.03.07-A3-1-P-1.nd2	3	31.381	0.955992
MAX_2023.03.07-A3-1-S-1.nd2:0002-0512-0659	305.475			MAX_2023.03.07-A3-1-S-1.nd2	7	31.537	2.21962
MAX_2023.03.07-A3-1-S1-1.nd2:0002-0571-0512	388.974			MAX_2023.03.07-A3-1-S1-1.nd2	9	31.534	2.85406
MAX_2023.03.07-A3-1-T-1.nd2:0002-0512-0600	377.265	341.485		MAX_2023.03.07-A3-1-T-1.nd2	5	31.108	1.6073	1.7814
MAX_2023.03.07-A3-2-P-1.nd2:0002-0512-0434	360.751			MAX_2023.03.07-A3-2-P-1.nd2	10	31.647	3.15986
MAX_2023.03.07-A3-2-S-1.nd2:0002-0645-0512	346.037	353.394		MAX_2023.03.07-A3-2-S-1.nd2	13	53.894	2.41214
MAX_2023.03.07-A3-2-T-1.nd2:0002-0512-0583	379.987			MAX_2023.03.07-A3-2-T-1.nd2	9	31.204	2.88425	2.81875
MAX_2023.03.07-A3-3-F-1.nd2:0002-0512-0675	347.062			MAX_2023.03.07-A3-3-F-1.nd2	11	31.433	3.49951
MAX_2023.03.07-A3-3-P-1.nd2:0002-0503-0512	405.781			MAX_2023.03.07-A3-3-P-1.nd2	7	31.819	2.19994
MAX_2023.03.07-A3-3-P1-1.nd2:0002-0415-0512	288.979			MAX_2023.03.07-A3-3-P1-1.nd2	4	33.43	1.19653
MAX_2023.03.07-A3-3-S-1.nd2:0002-0505-0512	409.337			MAX_2023.03.07-A3-3-S-1.nd2	13	31.214	4.1648	2.76519
MAX_2023.03.07-A3-3-T-1.nd2:0002-0587-0512	363.135	362.859		MAX_2023.03.07-A3-3-T-1.nd2	9
MAX_2023.03.07-A3-4-P-1.nd2:0002-0512-0667	523.051			MAX_2023.03.07-A3-4-P-1.nd2	24	31.315	7.66406
MAX_2023.03.07-A3-4-P1-1.nd2:0002-0512-0459	469.816			MAX_2023.03.07-A3-4-P1-1.nd2	29	32.75	8.85496
MAX_2023.03.07-A3-4-S-1.nd2:0002-0528-0631	383.806			MAX_2023.03.07-A3-4-S-1.nd2	8	24.698	3.23913
MAX_2023.03.07-A3-4-T-1.nd2:0002-0432-0626	634.548	502.805		MAX_2023.03.07-A3-4-T-1.nd2	15	26.604	5.63825	6.3491
MAX_2023.03.07-A3-5-F-1.nd2:0002-0647-0512	445.325			MAX_2023.03.07-A3-5-F-1.nd2	13	31.951	4.06873
MAX_2023.03.07-A3-5-P1-1.nd2:0002-0512-0474	345.95			MAX_2023.03.07-A3-5-P1-1.nd2	11	60.418	1.82065
MAX_2023.03.07-A3-5-S-1.nd2:0002-0349-0512	466.636			MAX_2023.03.07-A3-5-S-1.nd2	18	32.628	5.51673
MAX_2023.03.07-A3-5-T-1.nd2:0002-0519-0512	349.474	401.846		MAX_2023.03.07-A3-5-T-1.nd2	11	33.078	3.32547	3.6829
GFP + Vector				GFP + Vector
Source				Source
MAX_1-F-1.nd2:0001-0465-0512	598.14			MAX_1-F-1.nd2	6	31.351	1.91381
MAX_1-P-1.nd2:0001-0512-0456	484.105			MAX_1-P-1.nd2	15	54.184	2.76834
MAX_1-S-1.nd2:0001-0657-0512	368.013			MAX_1-S-1.nd2	6	34.485	1.73989
MAX_1-T-1.nd2:0001-0512-0615	439.926	472.546		MAX_1-T-1.nd2	8	32.106	2.49175	2.22845
MAX_2-F-1.nd2:0001-0512-0683	400.21			MAX_2-F-1.nd2	10	41.059	2.43552
MAX_2-P-1.nd2:0001-0584-0512	480.147			MAX_2-P-1.nd2	16	43.098	3.71247
MAX_2-S-1.nd2:0001-0512-0712	437.32			MAX_2-S-1.nd2	9	31.747	2.83491
MAX_2-T-1.nd2:0001-0674-0510	433.261	437.735		MAX_2-T-1.nd2	7	31.593	2.21568	2.79965
MAX_3-P-1.nd2:0001-0512-0616	407.672			MAX_3-P-1.nd2	12	31.055	3.86411
MAX_3-P1-1.nd2:0001-0502-0512	453.846			MAX_3-P1-1.nd2	7	32.96	2.12379
MAX_3-S-1.nd2:0001-0565-0512	293.808			MAX_3-S-1.nd2	4	31.461	1.27142
MAX_3-T-1.nd2:0001-0566-0512	632.495	446.955		MAX_3-T-1.nd2	12	31.469	3.81328	2.76815
MAX_4-P-1.nd2:0001-0542-0512	378.78			MAX_4-P-1.nd2	10	32.515	3.0755
MAX_4-P1-1.nd2:0001-0449-0512	403.831			MAX_4-P1-1.nd2	12	31.068	3.8625
MAX_4-S-2-1.nd2:0001-0543-0512	456.261			MAX_4-S-2-1.nd2	20	31.369	6.37572
MAX_4-T-2-1.nd2:0001-0518-0512	458.029	424.225		MAX_4-T-2-1.nd2	17	33.147	5.12867	4.6106
MAX_5-S-1.nd2:0001-0502-0509	565.26			MAX_5-S-1.nd2	22	31.645	6.95213
MAX_5-S1-1.nd2:0001-0344-0512	645.923			MAX_5-S1-1.nd2	17	31.203	5.44819
MAX_5-T-1.nd2:0001-0392-0512	562.194	591.126		MAX_5-T-1.nd2	13	31.509	4.12581	5.50871
GFP-2A-Cre + Vector				GFP-2A-Cre + Vector
Source	mean intensity	mean intensity of per neuron		Source	number	length	number of per 10 μm	number of per neuron
MAX_1-P-1.nd2:0001-0325-0512	237.791
MAX_1-S-1.nd2:0001-0512-0703	383.918
MAX_1-T-1.nd2:0001-0513-0512	308.022	309.91
MAX_2-P-1.nd2:0001-0512-0315	296.788
MAX_2-S-1.nd2:0001-0512-0600	377.183			MAX_2-S-1.nd2	6	31.939	1.87858
MAX_2-T-1.nd2:0001-0512-0625	248.711	307.561		MAX_2-T-1.nd2	3	31.653	0.947777	1.58483
MAX_3-F-1.nd2:0001-0497-0524	376.664			MAX_3-F-1.nd2	4	33.563	1.19179
MAX_3-P-1.nd2:0001-0503-0512	252.332			MAX_3-P-1.nd2	6	32.087	1.86992
MAX_3-S-1.nd2:0001-0512-0550	439.903	356.3		MAX_3-S-1.nd2	7	31.298	2.23656	1.76609
MAX_4-F-1.nd2:0001-0417-0512	342.374			MAX_4-F-1.nd2	4	33.289	1.2016
MAX_4-P-1.nd2:0001-0512-0606	314.442			MAX_4-P-1.nd2	5	35.444	1.41068
MAX_4-S-1.nd2:0001-0515-0512	257.892			MAX_4-S-1.nd2	4	31.462	1.27137
MAX_4-T-1.nd2:0001-0495-0512	348.242	315.738		MAX_4-T-1.nd2	3	31.721	0.945746	1.20735
MAX_5-P-1.nd2:0001-0368-0512	274.57			MAX_5-P-1.nd2	2	33.03	0.60551
MAX_5-S-1.nd2:0001-0512-0618	330.461			MAX_5-S-1.nd2	7		0.60551
MAX_5-S1-1.nd2:0001-0512-0651	341.545			MAX_5-S1-1.nd2	4	52.542	0.761296
MAX_5-T-1.nd2:0001-0512-0542	299.422	311.5		MAX_5-T-1.nd2	4	31.5	1.26984	0.878882
MAX_6-F-1.nd2:0001-0512-0619	347.196			MAX_6-F-1.nd2	9	31.509	2.85633
MAX_6-P-1.nd2:0001-0512-0522	470.169			MAX_6-P-1.nd2	13	31.141	4.17456
MAX_6-S-1.nd2:0001-0512-0627	403.491	406.952		MAX_6-S-1.nd2	9	30.941	2.90876	3.31322
GFP-2A-Cre + EndoA3				GFP-2A-Cre + EndoA3
Source	mean intensity	mean intensity of per neuron		Source	number	length	number of per 10 μm	number of per neuron
MAX_1-S-1.nd2:0001-0516-0687	536.714			MAX_1-S-1.nd2	19	34.639	5.48515
MAX_1-S1-1.nd2:0001-0512-0645	646.488	591.601		MAX_1-S1-1.nd2	13	43.034	3.02087	4.25301
MAX_2-P-1.nd2:0001-0451-0512	311.487			MAX_2-P-1.nd2	5	31.28	1.59847
MAX_2-S-1.nd2:0001-0443-0512-1	342.78			MAX_2-S-1.nd2	16	31.353	5.10318
MAX_2-T-1.nd2:0001-0455-0512	383.788	346.018		MAX_2-T-1.nd2	7	31.696	2.20848	2.97004
MAX_3-F-1.nd2:0001-0523-0534	244.75			MAX_3-F-1.nd2	4	36.279	1.10257
MAX_3-P-1.nd2:0001-0512-0531	329.841			MAX_3-P-1.nd2	10	31.544	3.17017
MAX_3-S-1.nd2:0001-0508-0512	326.031			MAX_3-S-1.nd2	13	31.425	4.13683
MAX_3-T-1.nd2:0001-0614-0512	308.289	302.228		MAX_3-T-1.nd2	8	32.228	2.48231	2.72297
MAX_4-P-1.nd2:0001-0498-0512	656.903			MAX_4-P-1.nd2	14	31.258	4.47885
MAX_4-P1-1.nd2:0001-0463-0512	485.826			MAX_4-P1-1.nd2	16	38.575	4.14776
MAX_4-S-1.nd2:0001-0515-0512	585.451			MAX_4-S-1.nd2	10	30.804	3.24633
MAX_4-S1-1.nd2:0001-0537-0512	554.51	570.673		MAX_4-S1-1.nd2	12	31.749	3.77965	3.91315
MAX_3-S-1.nd2:0001-0509-0512	327.916			MAX_3-S-1.nd2	9	31.934	2.81831
MAX_5-P-1.nd2:0001-0512-0622	578.222			MAX_5-P-1.nd2	31	31.697	9.78011
MAX_5-S-1.nd2:0001-0512-0612	581.462			MAX_5-S-1.nd2	23	31.675	7.26125
MAX_5-T-1.nd2:0001-0512-0590	557.854	511.363		MAX_5-T-1.nd2	17	30.676	5.54179	6.35036
MAX_6-F-1.nd2:0001-0563-0512	352.127			MAX_6-F-1.nd2	8	58.849	1.35941
MAX_6-F1-1.nd2:0001-0512-0576	265.441			MAX_6-F1-1.nd2	4	31.436	1.27243
MAX_6-P-1.nd2:0001-0512-0712	361.985			MAX_6-P-1.nd2	20	51.376	3.89287
MAX_6-S-1.nd2:0001-0512-0653	413.541			MAX_6-S-1.nd2	11	31.314	3.51281
MAX_6-S1-1.nd2:0001-0512-0577	432.694			MAX_6-S1-1.nd2	10	45.142	2.21523
MAX_6-T-1.nd2:0001-0509-0618	291.199			MAX_6-T-1.nd2	5	31.216	1.60174
MAX_6-T1-1.nd2:0001-0632-0512	334.224	350.173		MAX_6-T1-1.nd2	14	32.338	4.32927	2.59768
GFP + Vector				GFP + Vector
Source	mean intensity	mean intensity of per neuron		Source	number	length	number of per 10 μm	number of per neuron
MAX_4-S-1.nd2:0002-0512-0556	746.681			MAX_4-S-1.nd2	22	32.663	6.73545
MAX_4-P-1.nd2:0002-0512-0582	668.174	707.428		MAX_4-P-1.nd2	37	38.499	9.61064	8.17304
MAX_3-T-1.nd2:0002-0512-0646	566.352			MAX_3-T-1.nd2	31	31.484	9.84627
MAX_3-S-1.nd2:0002-0512-0756	606.849			MAX_3-S-1.nd2	32	38.259	8.36405
MAX_3-P-1.nd2:0002-0512-0671	575.526			MAX_3-P-1.nd2	48	32.028	14.9869
MAX_3-F-1.nd2:0002-0512-0724	450.777	549.876		MAX_3-F-1.nd2	10	31.768	3.14782	9.08626
MAX_2-T-1.nd2:0002-0545-0388	556.21			MAX_2-T-1.nd2	25	49.828	5.01726
MAX_2-S-1.nd2:0002-0512-0530	1067.72			MAX_2-S-1.nd2	27	31.445	8.58642
MAX_2-P-1.nd2:0002-0512-0576	1193.63			MAX_2-P-1.nd2	43	30.367	14.1601
MAX_2-F-1.nd2:0002-0512-0593	876.821	923.594		MAX_2-F-1.nd2	24	31.532	7.61132	8.84378
MAX_1-T-1.nd2:0002-0662-0512	570.976			MAX_1-T-1.nd2	15	30.997	4.83918
MAX_1-S-1.nd2:0002-0547-0512	668.518			MAX_1-S-1.nd2	32	31.213	10.2521
MAX_1-p-1.nd2:0002-0562-0430	604.099	614.531		MAX_1-p-1.nd2	25	32.546	7.68144	7.59092
GFP-2A-Cre + EndoA3				GFP-2A-Cre + EndoA3
Source	mean intensity	mean intensity of per neuron		Source	number	length	number of per 10 μm	number of per neuron
MAX_7-T-1.nd2:0002-0512-0721	487.412			MAX_7-T-1.nd2	9	34.413	2.61529
MAX_7-S-1.nd2:0002-0432-0512	491.662			MAX_7-S-1.nd2	15	31.045	4.8317
MAX_7-P-1.nd2:0002-0445-0512	470.149			MAX_7-P-1.nd2	19	30.962	6.13655
MAX_7-F-1.nd2:0002-0570-0522	538.378	496.9		MAX_7-F-1.nd2	9	32.847	2.73998	4.08088
MAX_6-T-1.nd2:0002-0512-0750	407.631			MAX_6-T-1.nd2	18	34.746	5.18045
MAX_6-S-1.nd2:0002-0512-0638	480.881			MAX_6-S-1.nd2	31	31.159	9.94897
MAX_6-P-1.nd2:0002-0512-0680	433.415			MAX_6-P-1.nd2	41	31.306	13.0965
MAX_6-F-1.nd2:0002-0512-0646	360.916	420.711		MAX_6-F-1.nd2	13	31.672	4.10457	8.08263
MAX_5-T-1.nd2:0002-0512-0660	387.491			MAX_5-T-1.nd2	10	59.679	1.67563
MAX_5-S-1.nd2:0002-0512-0496	382.008			MAX_5-S-1.nd2	13	32.587	3.98932
MAX_5-P-1.nd2:0002-0512-0509	334.918			MAX_5-P-1.nd2	10	38.131	2.62254
MAX_5-F-1.nd2:0002-0512-0670	397.571	375.497		MAX_5-F-1.nd2	9	31.484	2.85859	2.78652
MAX_4-T-1.nd2:0002-0512-0623	481.927			MAX_4-T-1.nd2	27	39.025	6.91864
MAX_4-S-1.nd2:0002-0512-0643	516.62			MAX_4-S-1.nd2	47	63.128	7.44519
MAX_4-P-1.nd2:0002-0512-0423	464.205			MAX_4-P-1.nd2	20	31.675	6.31413
MAX_4-F-1.nd2:0002-0567-0545	472.587	483.835		MAX_4-F-1.nd2	14	28.886	4.84664	6.89265
MAX_3-T1-1.nd2:0002-0513-0512	500.128			MAX_3-T1-1.nd2	11	32.137	3.42285
MAX_3-T-1.nd2:0002-0483-0535	551.966			MAX_3-T-1.nd2	32	29.556	10.8269
MAX_3-P-1.nd2:0002-0512-0568	534.905			MAX_3-P-1.nd2	11	31.571	3.48421
MAX_3-F-1.nd2:0002-0491-0512	593.004			MAX_3-F-1.nd2	26	31.298	8.30724
MAX_3-S-1.nd2:0002-0512-0727	523.337	540.668		MAX_3-S-1.nd2	29	37.1	7.81671	6.77158
MAX_2-T-1.nd2:0002-0507-0512	646.07			MAX_2-T-1.nd2	24	30.71	7.81504
MAX_2-S-1.nd2:0002-0510-0512	644.683			MAX_2-S-1.nd2	35	30.423	11.5045
MAX_2-P-1.nd2:0002-0486-0512	563.667	618.14		MAX_2-P-1.nd2	19	30.844	6.16003	8.49318
MAX_1-S-1.nd2:0002-0449-0512	596.842			MAX_1-S-1.nd2	14	30.942	4.52459
MAX_1-T-1.nd2:0002-0473-0512	494.995			MAX_1-T-1.nd2	12	33.773	3.55313
MAX_1-F-1.nd2:0002-0512-0645	481.651	524.496		MAX_1-F-1.nd2	10	32.003	3.12471	3.73415
GFP + Vector				GFP + Vector
Source	mean intensity	mean intensity of per neuron		Source	number	length	number of per 10 μm	number of per neuron
MAX_5-P-1-1.nd2:0001-0543-0512	762.864			MAX_5-P-1-1.nd2	22	31.855	6.90629
MAX_5-S-1.nd2:0001-0514-0512	780.497	771.681		MAX_5-S-1.nd2	33	31.038	10.6321	8.76921
MAX_4-T-1.nd2:0001-0413-0512	792.457			MAX_4-T-1.nd2	22	43.78	5.02513
MAX_4-S-1.nd2:0001-0512-0590	746.829			MAX_4-S-1.nd2	21	31.265	6.71678
MAX_4-P-1.nd2:0001-0512-0512	753.636	764.307		MAX_4-P-1.nd2	18	31.415	5.72975	5.82388
MAX_3-T-1.nd2:0001-0431-0512	676.589			MAX_3-T-1.nd2	12	33.496	3.58252
MAX_3-S-1.nd2:0001-0549-0512	692.231			MAX_3-S-1.nd2	19	42.483	4.47238
MAX_3-P-1.nd2:0001-0528-0512	721.605	696.808		MAX_3-P-1.nd2	27	31.283	8.63089	5.56193
MAX_2-T-1.nd2:0001-0610-0512	578.393			MAX_2-T-1.nd2	5	32.363	1.54497
MAX_2-P-1.nd2:0001-0512-0417	712.847	645.62		MAX_2-P-1.nd2	20	31.066	6.43791	3.99144
MAX_1-S-1.nd2:0001-0512-0521	701.243			MAX_1-S-1.nd2	16	31.446	5.08809
MAX_1-P-1.nd2:0001-0512-0511	733.436	717.34		MAX_1-P-1.nd2	22	32.036	6.86727	5.97768
GFP-2A-Cre + EndoA2				GFP-2A-Cre + EndoA2
Source	mean intensity	mean intensity of per neuron		Source	number	length	number of per 10 μm	number of per neuron
MAX_5-T-1.nd2:0001-0469-0512	473.891			MAX_5-T-1.nd2	10	31.728	3.15179
MAX_5-S-1.nd2:0001-0512-0502	629.575			MAX_5-S-1.nd2	14	30.985	4.51832
MAX_5-P-1.nd2:0001-0467-0512	510.816			MAX_5-P-1.nd2	15	31.064	4.82874
MAX_5-F-1.nd2:0001-0546-0512	496.309	527.648		MAX_5-F-1.nd2	7	30.993	2.25857	3.68936
MAX_4-P-1.nd2:0001-0499-0512	365.544			MAX_4-P-1.nd2	14	34.554	4.05163	4.05163
MAX_3-T-1.nd2:0001-0509-0512	575.445			MAX_3-T-1.nd2	5	31.643	1.58013
MAX_3-S-1.nd2:0001-0428-0512	632.946			MAX_3-S-1.nd2	15	30.772	4.87456
MAX_3-P-1.nd2:0001-0512-0674	567.73	592.04		MAX_3-P-1.nd2	8	31.988	2.50094	2.98521
MAX_2-T-1.nd2:0001-0512-0479	535.282			MAX_2-T-1.nd2	19	32.046	5.92898
MAX_2-S-1.nd2:0001-0512-0679	525.363			MAX_2-S-1.nd2	12	31.52	3.80711
MAX_2-P-1.nd2:0001-0512-0632	499.226	519.957		MAX_2-P-1.nd2	15	31.321	4.78912	4.84173
MAX_1-T-1.nd2:0001-0512-0663	414.872			MAX_1-T-1.nd2	8	31.562	2.53469
MAX_1-S-1.nd2:0001-0512-0680	447.247			MAX_1-S-1.nd2	7	31.605	2.21484
MAX_1-P-1.nd2:0001-0512-0673	431.34	431.153		MAX_1-P-1.nd2	19	32.093	5.92029	3.55661
GFP-2A-Cre + EndoA3				GFP-2A-Cre + EndoA3
Source	mean intensity	mean intensity of per neuron		Source	number	length	number of per 10 μm	number of per neuron
MAX_2-T-1.nd2:0001-0512-0722	448.448			MAX_2-T-1.nd2	7	31.426	2.22745
MAX_2-S-1.nd2:0001-0445-0512	462.571			MAX_2-S-1.nd2	12	31.027	3.8676
MAX_2-P-1.nd2:0001-0512-0595	364.955	425.325		MAX_2-P-1.nd2	12	31.315	3.83203	3.30903
MAX_1-T-1.nd2:0001-0431-0512	703.898			MAX_1-T-1.nd2	17	30.841	5.51214
MAX_1-S-1.nd2:0001-0581-0467	725.519			MAX_1-S-1.nd2	22	34.087	6.45407
MAX_1-P-1.nd2:0001-0567-0512	742.258			MAX_1-P-1.nd2	8	31.552	2.5355
MAX_1-F-1.nd2:0001-0603-0512	701.866	718.385		MAX_1-F-1.nd2	25	30.614	8.1662	5.66698
MAX_8-T-1.nd2:0001-0512-0538	433.916			MAX_8-T-1.nd2	17	35	4.85714
MAX_8-S-1.nd2:0001-0512-0512	485.869			MAX_8-S-1.nd2	11	32.786	3.35509
MAX_8-P-1.nd2:0001-0470-0512	371.022	430.269		MAX_8-P-1.nd2	14	32.226	4.34432	4.18552
MAX_7-T-1.nd2:0001-0578-0512	672.081			MAX_7-T-1.nd2	3	31.519	0.951807
MAX_7-S-1.nd2:0001-0512-0480	463.781			MAX_7-S-1.nd2	9	31.694	2.83965
MAX_7-P-1.nd2:0001-0512-0616	382.894	506.252		MAX_7-P-1.nd2	13	7.117	18.2661	7.35253
MAX_6-T-1.nd2:0001-0480-0512	341.643			MAX_6-T-1.nd2	7	31.971	2.18948
MAX_6-S-1.nd2:0001-0352-0512	335.697			MAX_6-S-1.nd2	6	37.289	1.60905
MAX_6-P-1.nd2:0001-0479-0512	280.384	319.241		MAX_6-P-1.nd2	1	32.002	0.31248	1.37034
MAX_5-T-1.nd2:0001-0512-0627	481.12			MAX_5-T-1.nd2	8	31.003	2.5804
MAX_5-S-1.nd2:0001-0512-0597	559.733			MAX_5-S-1.nd2	12	31.522	3.80687
MAX_5-P-1.nd2:0001-0512-0703	423.192	488.015		MAX_5-P-1.nd2	13	42.645	3.04842	3.14523
MAX_4-S-1.nd2:0001-0512-0465	712.939			MAX_4-S-1.nd2	14	42.812	3.27011
MAX_4-P-1.nd2:0001-0512-0599	398.712	555.826		MAX_4-P-1.nd2	7	31.42	2.22788	2.749
MAX_3-T-1.nd2:0001-0512-0451	865.89			MAX_3-T-1.nd2	10	44.969	2.22375
MAX_3-S-1.nd2:0001-0512-0440	730.42			MAX_3-S-1.nd2	16	31.601	5.06313
MAX_3-P-1.nd2:0001-0512-0479	802.887	799.732		MAX_3-P-1.nd2	14	31.654	4.42282	3.90324
GFP + Vector				GFP + Vector
Source	mean intensity	mean intensity of per neuron		Source	number	length	number of per 10 μm	number of per neuron
MAX_5-S-1.nd2:0002-0523-0512	471.407			MAX_5-S-1.nd2	10	31.047	3.22092
MAX_5-P-1.nd2:0002-0512-0533	382.565	426.986		MAX_5-P-1.nd2	10	31.771	3.14752	3.18422
MAX_4-T-1.nd2:0002-0508-0512	337.288			MAX_4-T-1.nd2	16	37.106	4.31197
MAX_4-S-1.nd2:0002-0546-0512	347.925			MAX_4-S-1.nd2	22	30.861	7.12874
MAX_4-P-1.nd2:0002-0717-0512	406.508			MAX_4-P-1.nd2	33	31.117	10.6051
MAX_4-F-1.nd2:0002-0547-0512	442.486	383.552		MAX_4-F-1.nd2	20	32.124	6.22587	7.06793
MAX_3-T-1.nd2:0002-0512-0480	434.036			MAX_3-T-1.nd2	29	62.244	4.65908
MAX_3-P-1.nd2:0002-0512-0464	364.067			MAX_3-P-1.nd2	30	62.928	4.76735
MAX_3-F-1.nd2:0002-0512-0605	422.797	406.967		MAX_3-F-1.nd2	21	34.277	6.12656	5.18433
MAX_2-S-1.nd2:0002-0534-0512	438.676			MAX_2-S-1.nd2	7	32.803	2.13395
MAX_2-P-1.nd2:0001-0633-0511	464.366	451.521		MAX_2-P-1.nd2	19	31.659	6.00145	4.0677
MAX_1-S-1.nd2:0002-0481-0512	446.573			MAX_1-S-1.nd2	11	30.673	3.58622
MAX_1-P-1.nd2:0002-0512-0541	446.051	446.312		MAX_1-P-1.nd2	14	30.989	4.51773	4.05197
GFP-2A-Cre + Vector				GFP-2A-Cre + Vector
Source	mean intensity	mean intensity of per neuron		Source	number	length	number of per 10 μm	number of per neuron
MAX_11-T-1.nd2:0002-0515-0512	286.373			MAX_11-T-1.nd2	9	31.204	2.88425
MAX_11-S-1.nd2:0002-0603-0512	383.265			MAX_11-S-1.nd2	11	31.786	3.46064
MAX_11-P-1.nd2:0002-0591-0512	293.285	320.974		MAX_11-P-1.nd2	9	31.632	2.84522	3.06337
MAX_10-T-1.nd2:0002-0512-0494	388.153			MAX_10-T-1.nd2	5	32.169	1.55429
MAX_10-S-1.nd2:0002-0438-0507	311.046			MAX_10-S-1.nd2	10	30.764	3.25055
MAX_10-P-1.nd2:0002-0649-0512	308.925			MAX_10-P-1.nd2	9	30.835	2.91876
MAX_10-F-1.nd2:0002-0512-0482	336.622	336.187		MAX_10-F-1.nd2	6	31.054	1.93212	2.41393
MAX_9-T-1.nd2:0002-0426-0512	343.44			MAX_9-T-1.nd2	1	30.799	0.324686
MAX_9-S-1.nd2:0002-0540-0512	262.739			MAX_9-S-1.nd2	2	31.207	0.640882
MAX_9-P-1.nd2:0002-0502-0512	270.907	292.362		MAX_9-P-1.nd2	4	31.181	1.28283	0.749467
MAX_7-T-1.nd2:0002-0512-0562	237.969			MAX_7-T-1.nd2	2	31.103	0.643025
MAX_7-S-1.nd2:0002-0512-0456	335.146			MAX_7-S-1.nd2	7	32.457	2.1567
MAX_7-P-1.nd2:0002-0512-0498	298.427	290.514		MAX_7-P-1.nd2	5	31.156	1.60483	1.46818
MAX_6-T-1.nd2:0002-0512-0519	332.397			MAX_6-T-1.nd2	4	38.885	1.02867
MAX_6-S-1.nd2:0002-0512-0714	315.597			MAX_6-S-1.nd2	3	31.2	0.961538
MAX_6-P-1.nd2:0002-0512-0527	330.628	326.207		MAX_6-P-1.nd2	6	30.837	1.94571	1.31198
MAX_5-T-1.nd2:0002-0512-0509	293.574			MAX_5-T-1.nd2	4	31.375	1.2749
MAX_5-F-1.nd2:0002-0495-0512	358.109			MAX_5-S-1.nd2	7	30.657	2.28333
MAX_5-S-1.nd2:0002-0675-0512	338.399			MAX_5-P-1.nd2	8	31.789	2.51659
MAX_5-P-1.nd2:0002-0512-0523	359.465	337.387		MAX_4-P-1.nd2	7	31.218	2.2423	2.07928
MAX_4-P-1.nd2:0002-0512-0543	318.045	318.045		MAX_3-S-1.nd2	7	30.654	2.28355	2.28355
MAX_3-S-1.nd2:0002-0524-0512	377.217			MAX_3-T-1.nd2	7	30.888	2.26625
MAX_3-T-1.nd2:0002-0512-0465	383.841			MAX_5-F-1.nd2	5	32.61	1.53327
MAX_3-F-1.nd2:0002-0507-0512	301.679	354.246		MAX_3-F-1.nd2	6	31.708	1.89227	1.89726
MAX_1-p-1.nd2:0002-0512-0432	469.332	469.332		MAX_1-p-1.nd2	8	31.337	2.55289	2.55289
MAX_2-S-1.nd2:0002-0505-0512	316.827	316.827		MAX_2-S-1.nd2	7	63.905	1.09538	1.09538
GFP-2A-Cre + EndoA1				GFP-2A-Cre + EndoA1
Source	mean intensity	mean intensity of per neuron		Source	number	length	number of per 10 μm	number of per neuron
MAX_5-S-1.nd2	578.107			MAX_5-S-1.nd2	20	31.95	6.25978
MAX_5-P-1.nd2	513.044	545.576		MAX_5-P-1.nd2	20	31.049	6.44143	6.35061
MAX_5-T-1.nd2	234.171			MAX_5-T-1.nd2	23	30.12	7.63612
MAX_4-S-1.nd2	634.171	434.171		MAX_4-S-1.nd2	25	31.85	7.84929	7.74271
MAX_3-T-1.nd2	481.154			MAX_3-T-1.nd2	15	31.637	4.74128
MAX_3-S-1.nd2	440.616			MAX_3-S-1.nd2	25	31.513	7.93323
MAX_3-P-1.nd2	471.985	464.585		MAX_3-P-1.nd2	20	31.389	6.37166	6.34873
MAX_1-T-1.nd2	581.288			MAX_1-T-1.nd2	29	31.924	9.08407
MAX_1-S-1.nd2	511.176			MAX_1-S-1.nd2	25	32.186	7.76735
MAX_1-P-1.nd2	576.191	556.218		MAX_1-P-1.nd2	17	33.485	5.0769	7.30944

## Sheet: Fig 4H Normalize
normalize													mean intensity																			number
22.12.05	GFP_Vector	GFP-2A-Cre + Vector	GFP-2A-Cre + EndoA1	GFP-2A-Cre + EndoA2	GFP-2A-Cre + EndoA3	Average	GFP_Vector	GFP-2A-Cre + Vector	GFP-2A-Cre + EndoA1	GFP-2A-Cre + EndoA2	GFP-2A-Cre + EndoA3		GFP_Vector	GFP-2A-Cre + Vector	GFP-2A-Cre + EndoA1	GFP-2A-Cre + EndoA2	GFP-2A-Cre + EndoA3			GFP_Vector	GFP-2A-Cre + Vector	GFP-2A-Cre + EndoA1	GFP-2A-Cre + EndoA2	GFP-2A-Cre + EndoA3		GFP	cre	EEN1	EEN2	EEN3		GFP_Vector	GFP-2A-Cre + Vector	GFP-2A-Cre + EndoA1	GFP-2A-Cre + EndoA2	GFP-2A-Cre + EndoA3
	802.849	445.972	671.668	685.642		572.871	1.40145	0.778486	1.17246	1.19685			1.40145	0.778486	1.17246	1.19685	1.19962			14.9484	11.2932	13.5047	10.7821		11.7977	1.26707	0.957243	1.1447	0.91392			1.26707	0.957243	1.1447	0.91392	1.2419
	642.245	440.022	602.333	682.904		572.871	1.1211	0.7681	1.05143	1.19207			1.10991	0.749736	1.05143	1.19207	0.958749			13.6928	9.67077	13.4613	8.99738		11.7977	1.16064	0.819719	1.14101	0.76264			1.08026	0.802819	1.14101	0.76264	0.720383
	635.835	429.502	540.149	640.448		572.871	1.10991	0.749736	0.942881	1.11796			0.954599	0.73434	0.942881	1.11796	0.865731			12.7446	9.4714	12.7707	7.54289		11.7977	1.08026	0.802819	1.08248	0.639354			1.05391	0.710614	1.08248	0.639354	0.551354
	626.241	420.682	531.45	619.925		572.871	1.09316	0.73434	0.927695	1.08214			0.76945	0.673912	0.927695	1.08214	0.843149			12.5901	8.38359	10.3914	7.21138		11.7977	1.06717	0.710614	0.880798	0.611254			0.785414	0.605155	0.880798	0.611254	0.540879
	546.862	419.454	495.706	572.295		572.871	0.954599	0.732197	0.865301	0.998994			1.28095	0.598326	0.865301	0.998994	0.814735			12.4337	8.30296	10.107	7.10407		11.7977	1.05391	0.70378	0.856697	0.602159			1.41537	0.375914	0.856697	0.602159	0.348447
	525.116	386.065	490.223	569.779		572.871	0.91664	0.673912	0.85573	0.994602			1.11434	1.1106	0.85573	0.994602	0.884501			11.1447	7.13942	9.90065	6.14426		11.7977	0.944654	0.605155	0.839203	0.520803			1.19229	1.36737	0.839203	0.520803	1.00827
	470.717	342.764	479.44	534.154		572.871	0.76945	0.598326	0.836908	0.932416			1.05325	0.981894	0.836908	0.932416	0.773646			9.26605	4.43491	7.75664	6.12578		11.7977	0.785414	0.375914	0.657472	0.519236			1.10806	0.958708	0.657472	0.519236	0.840818
	465.178		435.241	530.364		572.871	1		0.759754	0.9258			1.02055	0.928378	0.759754	0.9258	0.750505			7.56101		7.57821	5.72091		11.7977	0.64089		0.642348	0.484919			0.975431	0.871767	0.642348	0.484919	0.818265
	440.796		431.456	498.209		572.871			0.753147	0.86967			0.953951	0.863012	0.753147	0.869669	0.711018			11.7977		6.36964	5.55338		11.7977			0.539906	0.470718			0.890367	0.787671	0.539906	0.470718	0.803892
	572.871		408.377	494.038		572.871			0.71286	0.862389			0.910512	0.814275	0.71286	0.862389	0.692323			11.7977		5.09723	4.57996		11.7977			0.432054	0.388208			0.827774	0.673202	0.432054	0.388208	0.484464
				490.223		572.871				0.85573			0.891604	0.740886	1.67439	0.85573	0.601998						4.34404		11.7977				0.368211			0.748119	0.468651	1.74164	0.368211	0.443301
				480.917		572.871				0.839485			1.46552	0.822184	1.32985	0.839485	0.537302						4.31779		11.7977				0.365987			1.58831	1.69699	1.38528	0.365987	0.805665
				335.61		572.871				0.585838			1.05965	0.782945	1.31405	0.585838	1.24674						4.20959		11.7977				0.356816			0.992941	1.04657	1.36482	0.356816	1.77231
													0.932743	0.650482	1.24057	1.19006	1.20264						3.05432		11.7977							0.932285	0.77871	1.30645	1.13893	1.18696
	GFP_Vector	GFP-2A-Cre + Vector	GFP-2A-Cre + EndoA1	GFP-2A-Cre + EndoA2	GFP-2A-Cre + EndoA3	Average	GFP_Vector	GFP-2A-Cre + Vector	GFP-2A-Cre + EndoA1	GFP-2A-Cre + EndoA2	GFP-2A-Cre + EndoA3		0.911232	0.543072	1.03804	0.911989	1.07765															0.790824	0.448015	1.30125	1.06318	1.09211
23.03.07	536.894	465.492	701.798	498.796	502.805	419.136	1.28095	1.1106	1.67439	1.19006	1.19962		1.25252	1.07347	1.02195	0.898833	0.737956			7.23595	6.99054	8.90398	10.5097	6.3491	5.11241	1.41537	1.36737	1.74164	2.05573	1.2419		1.34678	0.868553	1.12891	0.970984	0.828901
	492.962	438.408	557.388	382.248	401.846	419.136	1.17614	1.04598	1.32985	0.911989	0.958749		1.15546	0.760698	0.993458	0.816825	0.729201			6.78853	6.1856	7.0821	5.82267	3.6829	5.11241	1.32785	1.20992	1.38528	1.13893	0.720383		1.07035	0.641015	1.12889	0.868174	0.759947
	467.06	411.547	550.765	376.733	362.859	419.136	1.11434	0.981894	1.31405	0.898833	0.865731		0.592025	0.634305	0.97183	0.816171	0.636916			6.09547	4.90131	6.9775	5.43543	2.81875	5.11241	1.19229	0.958708	1.36482	1.06318	0.551354		0.582871	0.550106	1.04989	0.834474	0.724979
	452.913	394.674	519.967	342.361	353.394	419.136	1.08059	0.941638	1.24057	0.816825	0.843149		1.32158	0.600706	0.912296	0.781333	0.591426			5.94523	4.54017	6.67913	4.96407	2.76519	5.11241	1.1629	0.888067	1.30645	0.970984	0.540879		1.07868	0.525545	0.996244	0.771014	0.549232
	441.457	389.117	435.082	342.087	341.485	419.136	1.05325	0.928378	1.03804	0.816171	0.814735		0.879337	0.51479	1.63874	0.738914	0.998935			5.66487	4.45683	6.65253	4.43846	1.7814	5.11241	1.10806	0.871767	1.30125	0.868174	0.348447		0.970267	0.405763	1.74513	0.649501	0.940604
	441.102	380.417	428.337	327.485		419.136	1.05241	0.907622	1.02195	0.781333			0.786822	0.487407	1.14451	0.727082	0.598301			5.51385	4.36165	5.77145	4.26617		5.11241	1.07852	0.85315	1.12891	0.834474			0.90116	0.389391	1.19638	0.64496	0.694711
	427.75	361.719	416.394	309.705		419.136	1.02055	0.863012	0.993458	0.738914			1.24574	0.750868	1.07837	0.717333	0.703958			4.9868	4.0269	5.77137	3.94174		5.11241	0.975431	0.787671	1.12889	0.771014			1.53741	0.924676	1.14113	0.324481	1.22037
	419.82	345.485	407.329	304.746		419.136	1.00163	0.824279	0.97183	0.727082			0.995846	0.665387	0.940927	0.534589	0.443914			4.79244	3.72153	5.36747	3.32052		5.11241	0.937412	0.727939	1.04989	0.649501			1.28676	0.492893	1.03026	0.123591	0.227449
	399.835	341.292	382.376	300.66		419.136	0.953951	0.814275	0.912296	0.717333			0.941916	0.656455	0.865279	0.447172	0.678599			4.55192	3.44168	5.09321	3.2973		5.11241	0.890367	0.673202	0.996244	0.64496			0.781345	0.442307	0.855369	0.612359	0.522044
	386.933	329.954		224.065		419.136	0.923168	0.787225		0.534589			0.922484	0.653106	1.05292	0.733709	0.772891			4.35805	2.8563		1.65888		5.11241	0.852445	0.5587		0.324481			0.772555	0.372623	0.762231	0.672489	0.456278
	381.628	310.532		187.426		419.136	0.910512	0.740886		0.447172			0.894014	0.648155	0.929913	0.823249	1.11205			4.23192	2.39594		0.631848		5.11241	0.827774	0.468651		0.123591			0.621931	0.336956	1.33055	0.495485	0.647858
	373.703					419.136	0.891604						1.47607	0.802335	0.881712	0.723015				4.05943					5.11241	0.794034						1.45551	0.245285	1.17056	0.80363
	354.607					419.136	0.846044						1.22241	0.609979	0.789413	0.59953				3.82469					5.11241	0.748119						0.966647	0.93342	1.07017	0.590325
	291.239					419.136	0.694856						1.35823	0.444528	0.74533					3.5246					5.11241	0.689421						0.923168	0.44053	0.97357
	419.136					419.136							1.6711	1.10935	0.72913					5.11241												0.662499	0.352274	0.925676
													1.11532	0.797477	0.671067																	0.992174	0.650227	0.841075
23.08.30													1.09043	0.771053	0.600256																	1.24785	0.512378	0.758118
	GFP_Vector	GFP-2A-Cre + Vector	GFP-2A-Cre + EndoA1	GFP-2A-Cre + EndoA2	GFP-2A-Cre + EndoA3	Average	GFP_Vector	GFP-2A-Cre + Vector	GFP-2A-Cre + EndoA1	GFP-2A-Cre + EndoA2	GFP-2A-Cre + EndoA3		0.956356	0.75176	1.32269																	1.05924	0.441345	0.609874
	656.902	368.533	734.544			448.237	1.46552	0.822184	1.63874				1.06726	1.10935	0.961925																	0.882247	0.311635	0.46367
	506.58	362.707	665.226			448.237	1.13016	0.809185	1.48409				1.00926		1.31473					5.71538	6.10646	6.96337			3.5984	1.58831	1.69699	1.93513				1.50023		1.72058
	474.975	350.945	513.01			448.237	1.05965	0.782945	1.14451				0.906597		1.28957					4.50131	3.87734	6.27969			3.5984	1.25092	1.07752	1.74513				0.863405		1.1388
	461.135	317.47	488.083			448.237	1.02878	0.708264	1.0889						1.09813					3.573	3.76598	4.86234			3.5984	0.992941	1.04657	1.35125				0.675879		1.34797
	418.09	291.57	483.365			448.237	0.932743	0.650482	1.07837						1.02625					3.49982	3.689	4.30507			3.5984	0.972606	1.02518	1.19638						1.34757
	415.769	252.36	435.755			448.237	0.927564	0.563006	0.972153											3.35473	2.80211	4.30049			3.5984	0.932285	0.77871	1.19511
	408.448	243.425	421.758			448.237	0.911232	0.543072	0.940927											2.85101	1.91711	4.10625			3.5984	0.792299	0.532767	1.14113
	243.998		408.21			448.237	0.544349		0.910701											2.8457	1.61214	3.87252			3.5984	0.790824	0.448015	1.07618
	448.237		387.85			448.237	1		0.865279											2.44623		3.7073			3.5984	0.679811		1.03026
			374.612			448.237			0.835745											3.5984		3.53439			3.5984	1		0.982211
			295.83			448.237			0.659986													3.07796			3.5984			0.855369
	GFP_Vector	GFP-2A-Cre + Vector	GFP-2A-Cre + EndoA1	GFP-2A-Cre + EndoA2	GFP-2A-Cre + EndoA3	Average	GFP_Vector	GFP-2A-Cre + Vector	GFP-2A-Cre + EndoA1	GFP-2A-Cre + EndoA2	GFP-2A-Cre + EndoA3											2.74281			3.5984			0.762231
	863.065	739.69	725.528			689.064	1.25252	1.07347	1.05292
	796.184	642.34	644.334			689.064	1.15546	0.932192	0.935086											7.20496	4.64655	8.15787			5.34977	1.34678	0.868553	1.5249
	407.943	524.17	640.77			689.064	0.592025	0.760698	0.929913											5.72611	4.33377	7.11815			5.34977	1.07035	0.810085	1.33055
	689.064	464.417	617.587			689.064	1	0.673982	0.896269											3.11823	3.42928	6.6532			5.34977	0.582871	0.641015	1.24364
		437.077	607.556			689.064		0.634305	0.881712											5.34977	3.14012	6.26223			5.34977	1	0.586964	1.17056
		425.382	556.415			689.064		0.617334	0.807494												2.94294	6.23562			5.34977		0.550106	1.16559
		413.925	543.956			689.064		0.600706	0.789413												2.82731	5.72514			5.34977		0.528492	1.07017
		379.812	527.816			689.064		0.551201	0.76599												2.81154	5.48833			5.34977		0.525545	1.0259
		354.723	513.58			689.064		0.51479	0.74533												2.25731	5.20837			5.34977		0.421946	0.97357
		351.702	506.873			689.064		0.510405	0.735596												2.17074	5.04212			5.34977		0.405763	0.942493
		335.855	502.418			689.064		0.487407	0.72913												2.09473	4.95215			5.34977		0.391556	0.925676
		300.335	498.22			689.064		0.435859	0.723039												2.08315	4.92997			5.34977		0.389391	0.92153
			462.408			689.064			0.671067												1.06515	4.49955			5.34977		0.199102	0.841075
			433.337			689.064			0.628877													4.43019			5.34977			0.828109
			413.615			689.064			0.600256													4.05576			5.34977			0.758118
			373.87			689.064			0.542577													3.30453			5.34977			0.617695
																						3.26268			5.34977			0.609874
	GFP_Vector	GFP-2A-Cre + Vector	GFP-2A-Cre + EndoA1	GFP-2A-Cre + EndoA2	GFP-2A-Cre + EndoA3	Average	GFP_Vector	GFP-2A-Cre + Vector	GFP-2A-Cre + EndoA1	GFP-2A-Cre + EndoA2	GFP-2A-Cre + EndoA3											2.97959			5.34977			0.556957
24.12.05	923.594				618.14	698.857	1.32158				0.884501											2.48052			5.34977			0.46367
	707.428				540.668	698.857	1.01226				0.773646
	614.531				524.496	698.857	0.879337				0.750505
	549.876				496.9	698.857	0.786822				0.711018									9.08626				8.49318	8.4235	1.07868
	698.857				483.835	698.857	1				0.692323									8.84378				7.08263	8.4235	1.04989				1.00827
					420.711	698.857					0.601998									8.17304				6.89265	8.4235	0.970267				0.840818
					375.497	698.857					0.537302									7.59092				6.77158	8.4235	0.90116				0.818265
						698.857														8.4235				4.08088	8.4235	1				0.803892
2023.06.16																									8.4235					#REF!
	GFP_Vector	GFP-2A-Cre + Vector	GFP-2A-Cre + EndoA1	GFP-2A-Cre + EndoA2	GFP-2A-Cre + EndoA3	ave	GFP_Vector	GFP-2A-Cre + Vector	GFP-2A-Cre + EndoA1	GFP-2A-Cre + EndoA2	GFP-2A-Cre + EndoA3
	591.126	406.952			591.601	474.517	1.24574	0.857613			1.24674									5.50871	3.31322			6.35036	3.58311	1.53741	0.924676
	472.546	356.3			570.673	474.517	0.995846	0.750868			1.20264									4.6106	1.76609			4.25301	3.58311	1.28676	0.492893			1.77231
	446.955	315.738			511.363	474.517	0.941916	0.665387			1.07765									2.79965	1.58483			3.91315	3.58311	0.781345	0.442307			1.18696
	437.735	311.5			350.173	474.517	0.922484	0.656455			0.737956									2.76815	1.33515			2.97004	3.58311	0.772555	0.372623			1.09211
	424.225	309.91			346.018	474.517	0.894014	0.653106			0.729201									2.22845	1.20735			2.72297	3.58311	0.621931	0.336956			0.828901
	474.517	307.561			302.228	474.517	1	0.648155			0.636916									3.58311	0.878882			2.59768	3.58311	1	0.245285			0.759947
																														0.724979
	771.681			527.648	425.325	719.151	1.07304			0.733709	0.591426
	764.307			592.04	718.385	719.151	1.06279			0.823249	0.998935
	696.808			519.957	430.269	719.151	0.968932			0.723015	0.598301									8.76921			3.68936	3.30903	6.02483	1.45551
	645.62			431.153	506.252	719.151	0.897753			0.59953	0.703958									5.82388			4.05163	5.66698	6.02483	0.966647			0.612359	0.549232
	717.34				319.241	719.151	0.997481				0.443914									5.56193			2.98521	4.18552	6.02483	0.923168			0.672489	0.940604
	719.151				488.015	719.151	1				0.678599									3.99144			4.84173	7.35253	6.02483	0.662499			0.495485	0.694711
					555.826	719.151					0.772891									5.97768			3.55661	1.37034	6.02483	0.992174			0.80363	1.22037
					799.732	719.151					1.11205									6.02483				3.14523	6.02483				0.590325	0.227449
																								2.749	6.02483					0.522044
	GFP_Vector	GFP-2A-Cre + Vector	GFP-2A-Cre + EndoA1	GFP-2A-Cre + EndoA2	GFP-2A-Cre + EndoA3	Average	GFP_Vector	GFP-2A-Cre + Vector	GFP-2A-Cre + EndoA1	GFP-2A-Cre + EndoA2	GFP-2A-Cre + EndoA3
2025.01.29	724.08	570.1	683.497			710.551	1.01904	0.802335	0.961925
	783.79	306.366	939.838			710.551	1.10307	0.431167	1.32269											5.31998	1.92343	4.97219			4.36617	1.21846	0.44053	1.1388
	679.54	433.421	407.943			710.551	0.956356	0.609979	0.574122											3.7724	1.41241	7.51233			4.36617	0.864007	0.32349	1.72058
	774.805	315.86				710.551	1.09043	0.444528												3.85204	1.78805	3.11823			4.36617	0.882247	0.409524	0.714179
	552.815	303.92				710.551	0.778008	0.427724												4.6248	1.07861				4.36617	1.05924	0.247038
	792.49	352.445				710.551	1.11532	0.496016												4.08342	1.21142				4.36617	0.935243	0.277456
	666.34	453.81				710.551	0.937779	0.638673												5.44831	1.53808				4.36617	1.24785	0.352274
	710.551					710.551	1													3.4622	2.03078				4.36617	0.792962	0.465118
																				4.36617	4.07546				4.36617	1	0.93342
	GFP_Vector	GFP-2A-Cre + Vector	GFP-2A-Cre + EndoA1	GFP-2A-Cre + EndoA2	GFP-2A-Cre + EndoA3	Average	GFP_Vector	GFP-2A-Cre + Vector	GFP-2A-Cre + EndoA1	GFP-2A-Cre + EndoA2	GFP-2A-Cre + EndoA3
	426.986	320.974	545.576			423.067	1.00926	0.758684	1.28957											3.18422	3.06337	6.35061			4.71123	0.675879	0.650227	1.34797
	383.552	336.187	434.171			423.067	0.906597	0.79464	1.02625											7.06793	2.41393	7.74268			4.71123	1.50023	0.512378	1.64345
	406.967	292.362	464.585			423.067	0.961943	0.691053	1.09813											5.18433	0.749467	6.34873			4.71123	1.10042	0.159081	1.34757
	451.521	290.514	556.218			423.067	1.06726	0.686685	1.31473											4.0677	1.46818	7.30944			4.71123	0.863405	0.311635	1.55149
	446.312	326.207				423.067	1.05494	0.771053												4.05197	1.31198				4.71123	0.860067	0.278478
	423.067	337.387				423.067	1	0.797477												4.71123	2.07928				4.71123	1	0.441345
		318.045				423.067		0.75176													2.28355				4.71123		0.484704
		354.246				423.067		0.837327													1.89726				4.71123		0.402711
		469.332				423.067		1.10935													2.55289				4.71123		0.541874
		316.827				423.067		0.748881													1.09538				4.71123		0.232503
