# Supplementary material for: Endophilin A1 facilitates organization of the GABAergic postsynaptic machinery to maintain excitation-inhibition balance
Source: eLife. 2025 Oct 2;13:RP102792. doi: 10.7554/eLife.102792 (PMC12490859; doi:10.7554/eLife.102792)
Supplement: Figure 4—source data 5. [file elife-102792-fig4-data5.xlsx]

## Sheet: Fig 4J-soma
GFP + Vector							GFP + Vector							GFP + Vector								normalize			mean intensity							number of puncta
Source	mean intensity	area	number		number of per neuron			mean intensity	area	number		number of per neuron			mean intensity	area	number		number of per neuron			GFP+vector	GFP+EEN1	Average	GFP+vector	GFP+EEN1				GFP+vector	Average	GFP+vector		GFP+EEN1	Average	GFP+EEN1
MAX_2022.02.10-2-1-P-1.nd2:0001-0512-0610	275.875	369.725	55	0.148759	4.46278		MAX_V-13-C-1.nd2:0001-0611-0551	252.823	226.65	22	0.097066	2.91198		MAX_V-1-C-1.nd2:0001-0509-0526	306.099	281.937	6	0.0212814	0.638441			442.425	515.631	315.901	1.40052	1.63225				4.46278	4.80164	0.929427		11.2605	4.80164	2.34513
MAX_2022.02.10-2-2-C-1.nd2:0001-0501-0583	269.819	162.369	33	0.203241	6.09722		MAX_V-12-C-1.nd2:0001-0535-0512	298.025	395.205	25	0.0632583	1.89775		MAX_V-12-C-1.nd2:0001-0510-0477	293.339	401.437	22	0.0548031	1.64409			418.496	512.539	315.901	1.32477	1.62247				6.09722	4.80164	1.26982		5.47832	4.80164	1.14093
MAX_2022.02.10-2-3-C-1.nd2:0001-0570-0542	351.699	279.72	64	0.2288	6.86401		MAX_V-11-C-1.nd2:0001-0497-0462	352.157	161.862	30	0.185343	5.56029		MAX_V-8-C-1.nd2:0001-0683-0341	310.955	98.032	3	0.0306023	0.918068			358.566	496.202	315.901	1.13506	1.57075				6.86401	4.80164	1.42951		10.884	4.80164	2.26673
MAX_2022.02.10-2-4-C-1.nd2:0001-0512-0701	442.425	222.267	32	0.143971	4.31913		MAX_V-9-C-1.nd2:0001-0512-0593	306.406	350.427	14	0.0399513	1.19854		MAX_V-7-C-1.nd2:0001-0584-0514	355.608	192.505	22	0.114283	3.42848			355.608	475.076	315.901	1.12569	1.50388				4.31913	4.80164	0.899511		14.4923	4.80164	3.0182
MAX_2022.02.10-2-5-C-1.nd2:0001-0475-0442	297.914	164.036	27	0.164598	4.93794		MAX_V-8-C-1.nd2:0001-0704-0341	308.965	96.177	5	0.0519875	1.55962		MAX_V-5-C-1.nd2:0001-0512-0542	299.677	308.454	12	0.0389037	1.16711			354.796	429.66	315.901	1.12312	1.36011				4.93794	4.80164	1.02839		6.5936	4.80164	1.3732
MAX_2022.02.10-2-8-C-1.nd2:0001-0480-0512	418.496	237.907	36	0.15132	4.53959		MAX_V-7-C-1.nd2:0001-0602-0526	345.699	214.807	30	0.13966	4.18981		MAX_V-3-C-1.nd2:0001-0532-0399	295.13	122.151	7	0.0573061	1.71918			352.157	424.846	315.901	1.11477	1.34487				4.53959	4.80164	0.945424		5.00354	4.80164	1.04205
MAX_2022.02.10-2-9-C-1.nd2:0001-0540-0448	358.566	309.742	56	0.180796	5.42387		MAX_V-7-C-1.nd2:0001-0602-0519	347.426	211.968	30	0.141531	4.24592		MAX_V-2-C-1.nd2:0001-0634-0466	329.558	203.16	7	0.0344556	1.03367			351.699	422.506	315.901	1.11332	1.33746				5.42387	4.80164	1.12959		8.96701	4.80164	1.86749
MAX_2022.02.10-2-10-C-1.nd2:0001-0448-0453	284.184	205.872	21	0.102005	3.06015		MAX_V-5-C-1.nd2:0001-0512-0523	300.551	321.69	16	0.0497373	1.49212		MAX_V-9-C-1.nd2:0001-0512-0612	305.548	357.25	15	0.0419874	1.25962			347.426	410.624	315.901	1.09979	1.29985				3.06015	4.80164	0.637314		9.14596	4.80164	1.90476
MAX_2022.02.10-2-11-C-1.nd2:0001-0496-0519	303.91	281.838	51	0.180955	5.42865		MAX_V-3-C-1.nd2:0001-0511-0391	300.802	133.741	9	0.0672942	2.01883		MAX_V-11-C-1.nd2:0001-0479-0462	354.796	167.479	15	0.0895635	2.6869			345.699	401.755	315.901	1.09433	1.27177				5.42865	4.80164	1.13058		4.6611	4.80164	0.970729
MAX_2022.02.10-2-12-C-1.nd2:0001-0550-0517	279.812	167.595	22	0.131269	3.93806		MAX_V-2-C-1.nd2:0001-0577-0512	336.965	272.733	17	0.062332	1.86996		MAX_V-13-C-1.nd2:0001-0609-0470	251.905	211.035	15	0.0710783	2.13235			341.213	380.039	315.901	1.08013	1.20303				3.93806	4.80164	0.820149		3.64577	4.80164	0.759276
MAX_2022.02.10-2-13-C-1.nd2:0001-0454-0463	341.213	175.79	33	0.187724	5.63172		MAX_V-1-C-1.nd2:0001-0563-0481	305.764	261.1	20	0.076599	2.29797										336.965	375.518	315.901	1.06668	1.18872				5.63172	4.80164	1.17287		5.14651	4.80164	1.07182
MAX_2022.02.10-2-14-C-1.nd2:0001-0548-0504	270.848	356.232	50	0.140358	4.21074																	329.558	372.808	315.901	1.04323	1.18014				4.21074	4.80164	0.876937		3.76742	4.80164	0.784611
MAX_2022.02.10-2-16-C-1.nd2:0001-0471-0512	287.677	555.952	65	0.116917	3.5075																	310.955	371.962	315.901	0.984343	1.17746				3.5075	4.80164	0.730479		7.25396	4.80164	1.51072
																						308.965	370.458	315.901	0.978044	1.1727				4.80164				4.94817	4.80164	1.03052
																						306.406	369.351	315.901	0.969943	1.1692								6.72801	4.80164	1.40119
																						306.099	367.81	315.901	0.968971	1.16432								7.19841
GFP + EndoA1							GFP + EndoA1							GFP + EndoA1								305.764	359.831	315.901	0.967911	1.13906
	mean intensity	area	number					mean intensity	area	number		number of per neuron			mean intensity	area	number		number of per neuron			305.548	357.222	315.901	0.967227	1.1308				0.638441	1.66279	0.383957		2.1037	1.66279	1.26516
MAX_2022.02.10-A-1-c-1.nd2:0001-0493-0610	369.351	154.523	58	0.375349	11.2605		MAX_A1-13-C-1.nd2:0001-0481-0659	515.631	139.218	58	0.416613	12.4984		MAX_A1-1-C-1.nd2:0001-0512-0353	330.1	385.036	27	0.0701233	2.1037			303.91	347.153	315.901	0.962042	1.09893				1.64409	1.66279	0.988755		3.29728	1.66279	1.98298
MAX_2022.02.10-A-2-C-1.nd2:0001-0487-0552	238.043	246.426	45	0.182611	5.47832		MAX_A1-11-C-1.nd2:0001-0538-0489	359.831	305.913	70	0.228823	6.8647		MAX_A1-13-C-1.nd2:0001-0481-0629	512.539	136.476	15	0.109909	3.29728			300.802	344.696	315.901	0.952203	1.09115				0.918068	1.66279	0.552124		1.72743	1.66279	1.03887
MAX_2022.02.10-A-3-C-1.nd2:0001-0421-0612	372.808	132.304	48	0.362801	10.884		MAX_A1-10-C-1.nd2:0001-0613-0547	370.458	163.096	29	0.177809	5.33428		MAX_A1-11-C-1.nd2:0001-0548-0461	357.222	295.236	17	0.0575811	1.72743			300.551	344.024	315.901	0.951409	1.08902				3.42848	1.66279	2.06188		1.9187	1.66279	1.1539
MAX_2022.02.10-A-4-C-1.nd2:0001-0435-0533	270.411	132.484	64	0.483077	14.4923		MAX_A1-9-C-1.nd2:0001-0510-0382	304.585	350.035	39	0.111417	3.34252		MAX_A1-8-C-1.nd2:0001-0512-0503	333.03	312.712	20	0.0639566	1.9187			299.677	333.03	315.901	0.948642	1.05422				1.16711	1.66279	0.701898		1.76827	1.66279	1.06343
MAX_2022.02.10-A-5-C-1-1.nd2:0001-0520-0473	422.506	300.291	66	0.219787	6.5936		MAX_A1-8-C-1.nd2:0001-0512-0504	332.227	298.136	41	0.137521	4.12563		MAX_A1-10-C-1.nd2:0001-0644-0645	371.962	152.692	9	0.0589422	1.76827			298.025	332.227	315.901	0.943412	1.05168				1.71918	1.66279	1.03391		0.96804	1.66279	0.582177
MAX_2022.02.10-A-6-C-1.nd2:0001-0549-0459	424.846	299.788	50	0.166785	5.00354		MAX_A1-7-C-1.nd2:0001-0554-0455	270.277	268.636	21	0.0781727	2.34518		MAX_A1-9-C-1.nd2:0001-0544-0469	302.37	340.895	11	0.032268	0.96804			297.914	330.1	315.901	0.943061	1.04495				1.03367	1.66279	0.621646		0.652023	1.66279	0.392125
MAX_2022.02.10-A-7-C-1.nd2:0001-0492-0630	293.539	274.339	82	0.2989	8.96701		MAX_A1-6-C-1.nd2:0001-0594-0380	289.943	210.535	28	0.132995	3.98984		MAX_A1-7-C-1.nd2:0001-0470-0496	307.853	276.064	6	0.0217341	0.652023			295.13	323.967	315.901	0.934248	1.02553				1.25962	1.66279	0.757534		1.72368	1.66279	1.03662
MAX_2022.02.10-A-8-C-1.nd2:0001-0446-0643	496.202	364.095	111	0.304865	9.14596		MAX_A1-5-C-1.nd2:0002-0568-0383	288.778	246.184	12	0.048744	1.46232		MAX_A1-6-C-1.nd2:0001-0654-0511	289.858	156.642	9	0.0574559	1.72368			293.339	312.269	315.901	0.928579	0.988503				2.6869	1.66279	1.6159		0.574108	1.66279	0.345267
MAX_2022.02.10-A-9-C-1.nd2:0001-0582-0624	344.696	405.484	63	0.15537	4.6611		MAX_A1-4-C-1.nd2:0001-0512-0429	347.153	164.283	29	0.176525	5.29574		MAX_A1-5-C-1.nd2:0001-0551-0444	284.229	261.275	5	0.0191369	0.574108			287.677	307.853	315.901	0.910655	0.974523				2.13235	1.66279	1.28239		1.25529	1.66279	0.754927
MAX_2022.02.10-A-10-C-1.nd2:0001-0542-0536	312.269	452.579	55	0.121526	3.64577		MAX_A1-2-C-1.nd2:0001-0560-0417	475.076	325.443	75	0.230455	6.91365		MAX_A1-2-C-1.nd2:0001-0578-0429	375.518	334.585	14	0.0418429	1.25529			284.184	304.585	315.901	0.899598	0.964178				1.66279				2.11172	1.66279	1.26998
MAX_2022.02.10-A-11-C-1.nd2:0001-0483-0593	401.755	238.997	41	0.17155	5.14651		MAX_A1-1-C-1.nd2:0001-0512-0362	429.66	406.108	62	0.152669	4.58006		MAX_A1-4-C-2-1.nd2:0001-0488-0456	344.024	127.858	9	0.0703906	2.11172			279.812	302.37	315.901	0.885758	0.957167
MAX_2022.02.10-A-13-C-1.nd2:0001-0616-0512	323.967	430.002	54	0.125581	3.76742																	275.875	293.539	315.901	0.873296	0.929212				2.91198	2.65844	1.09537		12.4984	2.65844	4.70141
MAX_2022.02.10-A-15-C-1.nd2:0001-0420-0490	367.81	264.683	64	0.241799	7.25396																	270.848	289.943	315.901	0.857382	0.917829				1.89775	2.65844	0.713859		6.8647	2.65844	2.58223
MAX_2022.02.10-A-14-C-1.nd2:0001-0512-0501	410.624	400.148	66	0.164939	4.94817																	269.819	289.858	315.901	0.854125	0.917559				5.56029	2.65844	2.09157		5.33428	2.65844	2.00655
MAX_2022.02.10-A-12-C-1.nd2:0001-0480-0556	380.039	321.046	72	0.224267	6.72801																	252.823	288.778	315.901	0.800323	0.914141				1.19854	2.65844	0.450843		3.34252	2.65844	1.25733
																						251.905	284.229	315.901	0.797417	0.899741				1.55962	2.65844	0.58667		4.12563	2.65844	1.5519
																						315.901	270.411	315.901	1	0.855999				4.18981	2.65844	1.57604		2.34518	2.65844	0.882166
																							270.277	315.901		0.855575				4.24592	2.65844	1.59715		3.98984	2.65844	1.50082
																							238.043	315.901		0.753537				1.49212	2.65844	0.561277		1.46232	2.65844	0.550068
																														2.01883	2.65844	0.759404		5.29574	2.65844	1.99205
																														1.86996	2.65844	0.703406		6.91365	2.65844	2.60065
																														2.29797	2.65844	0.864407		4.58006	2.65844	1.72284
																														2.65844	2.65844	1			2.65844

## Sheet: Fig 4J-dendrite
GFP + Vector								GFP + Vector																	normalize
Source	Mean Intensity	Mean Intensity of per neuron	length	number	number of per 10 μm	number of per neuron		Source	MeanIntensity	Mean Intensity of per neuron	length	number	number of per 10 μm	number of per neuron		Source	MeanIntensity	Mean Intensity of per neuron	length	number	number of per 10 μm	number of per neuron			mean intensity						number
2022.02.10-2-4-T-MaxIP	858.19		32.21	36	11.1767			MAX_V-1-P-1.nd2:0001-0512-0505	372.948		31.573	11	3.48399			MAX_V-1-P-1.nd2:0001-0512-0498	380.878		30.909	18	5.82355				GFP+vector	GFP+EEN1	Average	GFP+vector	GFP+EEN1		GFP+vector	GFP+EEN1	Average	GFP+vector	GFP+EEN1
2022.02.10-2-4-S-MaxIP	735.5		32.01	20	6.24805			MAX_V-1-S-1.nd2:0001-0512-0486	340.637	356.793	31.535	14	4.43951	3.96175		MAX_V-1-S-1.nd2:0001-0512-0477	339.322	360.1	31.398	35	11.1472	8.48538			767.643	855.43	430.121	1.78471	1.98881		11.4711	23.0772	4.85444	2.36302	4.75384
2022.02.10-2-4-P1-MaxIP	796.02		32.01	28	8.74727			MAX_V-2-P-1.nd2:0001-0487-0512	366.549		31.014	12	3.86922			MAX_V-2-P-1.nd2:0001-0508-0512	370.688		32.121	18	5.60381				659.23	837.445	430.121	1.53266	1.947		10.6892	18.9915	4.85444	2.20195	3.91219
2022.02.10-2-4-P-MaxIP	680.86	796.57	35.61	14	3.93148	7.52586		MAX_V-2-P1-1.nd2:0001-0512-0524	425.826		40.577	17	4.18957			MAX_V-2-P1-1.nd2:0001-0512-0531	413.313		38.677	23	5.94669				650.517	794.527	430.121	1.5124	1.84722		9.75336	15.691	4.85444	2.00916	3.23231
2022.02.10-2-3-T-MaxIP	430.42		33.5	12	3.58209			MAX_V-2-T-1.nd2:0001-0512-0507	446.133	412.836	31.257	20	6.39857	4.81912		MAX_V-2-T-1.nd2:0001-0512-0509	450.773	411.591	31.033	26	8.37818	6.64289			692.463	685.26	430.121	1.60993	1.59318		8.48538	15.0408	4.85444	1.74796	3.09835
2022.02.10-2-3-S-MaxIP	371.9		31.89	11	3.44936			MAX_V-3-P-1.nd2:0001-0505-0512	420.47		31.317	10	3.19315			MAX_V-3-P-1.nd2:0001-0516-0512	431.852		32.085	13	4.05174				555.94	681.84	430.121	1.29252	1.58523		8.11788	13.646	4.85444	1.67226	2.81103
2022.02.10-2-3-P-MaxIP	440.47	414.263	33.18	16	4.82218	3.95121		MAX_V-3-S-1.nd2:0001-0512-0522	322.947	371.709	32.913	4	1.21533	2.20424		MAX_V-3-S-1.nd2:0001-0512-0529	326.299	379.075	32.985	6	1.81901	2.93537			554.843	679.742	430.121	1.28997	1.58035		7.52586	12.9266	4.85444	1.55031	2.66284
2022.02.10-2-2-T-MaxIP	609.2		33.64	12	3.56718			MAX_V-4-P-1.nd2:0001-0512-0470	334.558		31.118	2	0.642715			MAX_V-4-P-1.nd2:0001-0512-0493	554.425		31.318	15	4.78958				520.742	657.695	430.121	1.21069	1.52909		7.34337	12.7879	4.85444	1.51271	2.63427
2022.02.10-2-2-S-MaxIP	523.35		32.53	17	5.22595			MAX_V-4-S-1.nd2:0001-0512-0566	314.682		33.447	5	1.4949			MAX_V-4-S-1.nd2:0001-0512-0566	317.55		30.674	5	1.63004				515.42	610.168	430.121	1.19831	1.4186		7.112	12.5729	4.85444	1.46505	2.58999
2022.02.10-2-2-P-MaxIP	535.27	555.94	31.64	18	5.689			MAX_V-4-T-1.nd2:0001-0357-0512	374.982	341.407	33.65	8	2.37741	1.50501		MAX_V-4-T-1.nd2:0001-0376-0512	542.013	471.329	33.91	8	2.35919	2.92627			489.992	563.622	430.121	1.1392	1.31038		6.64289	12.4964	4.85444	1.36842	2.57422
2022.02.10-2-1-S-MaxIP	552.84		32.59	17	5.21632			MAX_V-13-P-1.nd2:0001-0592-0512	260.404		31.522	12	3.80687			MAX_V-5-P-1.nd2:0001-0471-0512	378.777		31.317	10	3.19315				473.17	560.77	430.121	1.10009	1.30375		6.05084	12.2135	4.85444	1.24645	2.51595
2022.02.10-2-1-P1-MaxIP	559.34		32.21	34	10.5557	6.05084		MAX_V-12-T-1.nd2:0001-0440-0512	363.971		32.409	9	2.77701			MAX_V-5-S-1.nd2:0001-0487-0512	366.904	372.841	31.612	12	3.79603	3.49459			471.329	548.745	430.121	1.09581	1.27579		5.54118	11.9993	4.85444	1.14147	2.47183
2022.02.10-2-1-P-MaxIP	503.72	538.633	63.73	18	2.82442			MAX_V-12-P-1.nd2:0001-0492-0512	392.381		30.674	12	3.91211			MAX_V-6-F-1.nd2:0001-0488-0512	327.096		31.352	5	1.59479				461.188	527.011	430.121	1.07223	1.22526		4.81912	11.5058	4.85444	0.992724	2.37015
2022.02.10-2-13-T-MaxIP	426.85		31.5	14	4.44444	4.00173		MAX_V-12-F-1.nd2:0001-0434-0512	364.917	345.418	31.302	7	2.23628	3.18306		MAX_V-6-S-1.nd2:0001-0494-0512	281.935		31.567	7	2.21751				414.263	526.785	430.121	0.963131	1.22474		4.61541	11.4535	4.85444	0.95076	2.35939
2022.02.10-2-13-P-MaxIP	560.96	493.905	31.67	15	4.73634			MAX_V-11-S-1.nd2:0001-0512-0456	419.666		35.797	7	1.95547			MAX_V-6-T-1.nd2:0001-0512-0282	289.541	299.524	37.117	6	1.61651	1.8096			414.09	524.09	430.121	0.962728	1.21847		4.36956	10.6887	4.85444	0.900116	2.20184
2022.02.10-2-12-P1-MaxIP	361.22		31.62	30	9.48767	7.112		MAX_V-11-P1-1.nd2:0001-0420-0512	357.77		31.643	11	3.47628			MAX_V-7-P-1.nd2:0001-0456-0512	396.01		31.811	21	6.60149				412.836	520.271	430.121	0.959813	1.20959		4.31463	9.80339	4.85444	0.8888	2.01947
2022.02.10-2-12-P-MaxIP	441.95	401.585	35.22	9	2.55537			MAX_V-11-P-1.nd2:0001-0512-0468	460.206	412.547	29.286	22	7.51212	4.31463		MAX_V-8-P-1.nd2:0001-0512-0451	425.544		46.88	9	1.9198				412.547	516.51	430.121	0.959142	1.20085		4.07499	9.68915	4.85444	0.839435	1.99594
2022.02.10-2-11-S-MaxIP	315.88		32.05	23	7.17629			MAX_V-10-T-1.nd2:0001-0512-0538	474.921		33.331	13	3.90027			MAX_V-8-P1-1.nd2:0001-0510-0489	347.376		32.078	11	3.42914				411.591	503.13	430.121	0.956919	1.16974		4.0381	9.35761	4.85444	0.831836	1.92764
2022.02.10-2-11-P2-MaxIP	322.33		32.24	24	7.44417			MAX_V-10-S-1.nd2:0001-0512-0487	392.31		30.522	13	4.25922			MAX_V-8-S-1.nd2:0001-0512-0482	340.878		30.671	9	2.93437				409.764	498.096	430.121	0.952672	1.15804		4.00173	9.12767	4.85444	0.824345	1.88027
2022.02.10-2-11-P1-MaxIP	430.09		36.08	18	4.98891	5.54118		MAX_V-10-P-1.nd2:0001-0541-0512	353.28		30.151	8	2.65331			MAX_V-8-T-1.nd2:0001-0465-0513	415.052	384.972	32.041	17	5.3057	4.0381			401.585	485.425	430.121	0.933655	1.12858		3.96175	8.78249	4.85444	0.816109	1.80917
2022.02.10-2-11-P-MaxIP	400.43	367.183	32.02	18	5.62149			MAX_V-10-F-1.nd2:0001-0512-0462	418.547	409.764	30.956	12	3.87647	3.67232		MAX_V-9-P-1.nd2:0001-0512-0525	328.24		31.4	14	4.4586				384.972	479.047	430.121	0.895031	1.11375		3.95121	8.1194	4.85444	0.813937	1.67257
2022.02.10-2-10-P-MaxIP	506.05		32.57	33	10.132			MAX_V-9-T-1.nd2:0001-0512-0350	362.617		42.66	7	1.64088			MAX_V-9-S-1.nd2:0001-0512-0459	399.08		31.876	18	5.64688				379.075	473.021	430.121	0.881322	1.09974		3.74081	7.70927	4.85444	0.770595	1.58809
2022.02.10-2-9-T-MaxIP	689.93		32.04	24	7.49064			MAX_V-9-S-1.nd2:0001-0512-0470	394.312		29.135	14	4.80522			MAX_V-9-T-1.nd2:0001-0512-0327	353.262	360.194	63.266	19	3.00319	4.36956			375.664	437.083	430.121	0.873392	1.01618		3.67232	7.68298	4.85444	0.756487	1.58267
2022.02.10-2-9-S-MaxIP	672.6		32.63	20	6.12933	7.34337		MAX_V-9-P-1.nd2:0001-0516-0527	331.561	362.83	31.594	8	2.53213	2.99274		MAX_V-10-F-1.nd2:0001-0512-0413	401.643		31.237	14	4.48186				372.841	433.731	430.121	0.866826	1.00839		3.49459	7.63481	4.85444	0.719875	1.57275
2022.02.10-2-9-P-MaxIP	589.02	614.4	31.74	10	3.1506			MAX_V-8-T-1.nd2:0001-0501-0512	413.919		32.443	11	3.39056			MAX_V-10-P-1.nd2:0001-0500-0512	363.154		31.192	7	2.24417				371.709	428.778	430.121	0.864195	0.996877		3.18306	7.61542	4.85444	0.655702	1.56875
2022.02.10-2-8-P-MaxIP	659.23	659.23	31.23	35	11.2072			MAX_V-8-S-1.nd2:0001-0512-0479	345.894		31.027	7	2.2561			MAX_V-10-S-1.nd2:0001-0512-0527	420.609		31.545	15	4.75511				367.183	394.26	430.121	0.853672	0.916625		2.99274	7.4664	4.85444	0.616496	1.53806
2022.02.10-2-7-T-MaxIP	1074.48		33.6	36	10.7143			MAX_V-8-P1-1.nd2:0001-0512-0483	362.37		32.141	9	2.80016			MAX_V-10-T-1.nd2:0001-0512-0437	659.345	461.188	31.128	15	4.81881	4.07499			367.109	392.395	430.121	0.853501	0.912289		2.93537	6.177	4.85444	0.604678	1.27244
2022.02.10-2-7-S-MaxIP	1136.83		32.26	76	23.5586			MAX_V-8-P-1.nd2:0001-0512-0445	346.252	367.109	31.845	5	1.57011	2.50423		MAX_V-11-P-1.nd2:0001-0512-0468	465.472		31.834	22	6.91085				362.83	390.036	430.121	0.843553	0.906805		2.92627	5.71028	4.85444	0.602803	1.1763
2022.02.10-2-7-P-MaxIP	1453.06		97.6	47	4.81557	10.6892		MAX_V-7-P-1.nd2:0001-0463-0512	378.071		32.658	13	3.98065			MAX_V-11-P1-1.nd2:0001-0422-0512	355.166		31.758	11	3.46369				360.194	386.831	430.121	0.837424	0.899353		2.72723	5.64567	4.85444	0.561801	1.16299
2022.02.10-2-7-C-MaxIP	1483.01	1286.85	26.76	25	9.3423			MAX_V-6-T-1.nd2:0001-0512-0290	285.761		56.359	5	0.88717			MAX_V-11-S-1.nd2:0001-0512-0457	421.631	414.09	31.685	11	3.47167	4.61541			360.1	371.291	430.121	0.837206	0.863224		2.50423	5.46322	4.85444	0.515864	1.12541
2022.02.10-2-6-S-MaxIP	1124.56		37.5	51	13.6	11.4712		MAX_V-6-S-1.nd2:0001-0514-0512	312.253		29.898	6	2.00682			MAX_V-12-F-1.nd2:0001-0457-0512	372.835		31.136	7	2.2482				356.793	365.409	430.121	0.829516	0.849549		2.34851	5.31979	4.85444	0.483785	1.09586
2022.02.10-2-6-P-MaxIP	888.49	1006.52	32.7	7	2.14067			MAX_V-6-F-1.nd2:0001-0479-0512	325.994	325.52	30.589	5	1.63457	2.1273		MAX_V-12-P-1.nd2:0001-0449-0512	402.518		31.544	16	5.07228				345.418	359.623	430.121	0.803072	0.836096		2.20424	5.15839	4.85444	0.454067	1.06261
2022.02.10-2-5-P-MaxIP	295.53		31.68	15	4.73485			MAX_V-5-S-1.nd2:0001-0487-0512	367.958		29.457	9	3.0553			MAX_V-12-S-1.nd2:0001-0512-0575	377.236		32.037	14	4.36995				341.407	346.95	430.121	0.793747	0.806633		2.1273	5.07504	4.85444	0.438218	1.04544
2022.02.10-2-17-S-MaxIP	224.05		76.56	10	1.30617	2.72723		MAX_V-5-P-1.nd2:0001-0470-0512	383.371	375.664	30.456	5	1.64171	2.34851		MAX_V-12-T-1.nd2:0001-0440-0512	362.155		31.075	13	4.18343				330.09	339.804	430.121	0.767435	0.790019		1.8096	4.80728	4.85444	0.372773	0.990285
2022.02.10-2-17-P-MaxIP	221.69	222.87	32.22	17	5.27623											MAX_V-13-P-1.nd2:0001-0592-0533	260.209	354.991	31.8	9	2.83019	3.74081			325.52	339.693	430.121	0.756809	0.789761		1.50501	4.35617	4.85444	0.310028	0.897358
2022.02.10-2-16-S-MaxIP	339.4		31.27	14	4.47713	4.87668																			302.035	338.471	430.121	0.702209	0.786919		4.85444	4.07713	4.85444	1	0.839876
2022.02.10-2-16-P-MaxIP	320.78	330.09	31.98	7	2.18887																				299.524		430.121	0.696371				3.43694	4.85444		0.707999
2022.02.10-2-15-S-MaxIP	278.95		31.96	37	11.577																				222.87		430.121	0.518156				2.54908	4.85444		0.525102
2022.02.10-2-14-T-MaxIP	456.62		33.76	35	10.3673																				430.121		430.121	1
2022.02.10-2-14-S1-MaxIP	495.25		32.67	37	11.3254
2022.02.10-2-14-S-MaxIP	614		32.49	32	9.84918
2022.02.10-2-14-P-MaxIP	464.62		48.92	32	6.54129
2022.02.10-2-14-F-MaxIP	419.47	489.992	46.22	23	4.9762	8.11788
2022.02.10-2-13-P-MaxIP	455
2022.02.10-2-13-S-MaxIP	575.84	515.42
GFP + EndoA1								GFP + EndoA1								GFP + EndoA1
Source	MeanIntensity		length	number				Source	MeanIntensity		length	number				Source	MeanIntensity		length	number
2022.02.10-A-3-P-MaxIP	513.18		35.13	10	2.84657			MAX_A1-1-P (2)-1.nd2:0001-0512-0465	376.676		31.266	11	3.5182			MAX_A1-14-P1-1.nd2:0001-0536-0512	580.834		31.555	64	20.282
2022.02.10-A-3-S-MaxIP	493.08	503.13	32.29	9	2.78724			MAX_A1-1-S-1.nd2:0001-0468-0512	582.67		31.74	42	13.2325			MAX_A1-14-P-1.nd2:0001-0583-0512	639.502	610.168	31.694	82	25.8724	23.0772
2022.02.10-A-2-T-MaxIP	367.79		59.6	12	2.01342	2.54908		MAX_A1-1-T-1.nd2:0001-0477-0512	612.925	524.09	31.867	18	5.64848	7.4664		MAX_A1-13-S-1.nd2:0001-0451-0512	746.228		31.321	54	17.2408
2022.02.10-A-2-S1-MaxIP	339.8		37.45	12	3.20427			MAX_A1-2-P-1.nd2:0001-0472-0512	468.095		31.953	22	6.88511			MAX_A1-13-P-1.nd2:0001-0679-0512	729.997		31.386	67	21.3471
2022.02.10-A-2-S-MaxIP	383.33		32.13	21	6.53595			MAX_A1-2-T-1.nd2:0001-0512-0524	477.946	473.021	30.868	14	4.53544	5.71028		MAX_A1-12-T-1.nd2:0001-0512-0581	408.832		31.668	21	6.6313
2022.02.10-A-2-P1-MaxIP	443.99		34.8	18	5.17241			MAX_A1-3-P-1.nd2:0001-0512-0465	563.622	563.622	30.743	27	8.78249	8.78249		MAX_A1-12-S-1.nd2:0001-0512-0632	358.083		31.873	22	6.90239
2022.02.10-A-2-P-MaxIP	409.92	394.26	33.14	23	6.94025	5.46322		MAX_A1-4-S-1.nd2:0001-0512-0511	339.906		32.956	17	5.15839	5.15839		MAX_A1-12-P-1.nd2:0001-0512-0597	391.917	527.011	31.852	33	10.3604	12.4964
2022.02.10-A-1-s-MaxIP	450.22		32.2	35	10.8696			MAX_A1-5-P-1.nd2			30.923	7	2.26369			MAX_A1-11FT-1.nd2:0001-0512-0557	469.318		31.362	34	10.8411
2022.02.10-A-1-P-MaxIP	603.35	526.785	31.99	42	13.1291	11.9993		MAX_A1-5-S-1.nd2:0001-0508-0512	339.48	339.693	31.961	17	5.31898			MAX_A1-11-T-1.nd2:0001-0512-0508	575.773		31.221	40	12.8119
2022.02.10-A-5-P1-MaxIP	725.33		32.79	16	4.87954			MAX_A1-5-T-1.nd2:0001-0512-0576	371.291	371.291	32.267	15	4.64871	4.07713		MAX_A1-11-S-1.nd2:0001-0512-0479	477.946		31.601	48	15.1894
2022.02.10-A-5-P-MaxIP	590.06	657.695	31.4	42	13.3758	9.12767		MAX_A1-6-P-1.nd2:0001-0546-0512	380.586		31.86	15	4.7081			MAX_A1-11-P-1.nd2:0001-0454-0512	418.662	485.425	31.443	36	11.4493	12.5729
2022.02.10-A-4-S-MaxIP	458.82		43.82	30	6.84619			MAX_A1-6-S-1.nd2:0001-0512-0392	338.659	359.623	32.321	7	2.16577	3.43694		MAX_A1-10-S-1.nd2:0001-0512-0480	341.96		31.416	33	10.5042
2022.02.10-A-4-P-MaxIP	574.2	516.51	31.94	30	9.39261	8.1194		MAX_A1-7-P-1.nd2:0001-0512-0540	371.294		31.42	18	5.72884			MAX_A1-10-P1-1.nd2:0001-0451-0512	556.549		32.503	79	24.3054
2022.02.10-A-3-S-MaxIP	515.8		32.48	14	4.31034			MAX_A1-7-S-1.nd2:0001-0512-0437	427.012		33.301	23	6.9067			MAX_A1-10-P-1.nd2:0001-0512-0409	412.739	437.083	41.587	51	12.2634	15.691
2022.02.10-A-11-P-MaxIP	581.69	548.745	32.05	17	5.30421	4.80728		MAX_A1-7-S1-1.nd2:0001-0542-0512	378.879	392.395	30.893	8	2.58958	5.07504		MAX_A1-9-S-1.nd2:0001-0452-0538	397.268		30.345	22	7.24996
2022.02.10-A-10-P-MaxIP	515.63		48.23	21	4.35414			MAX_A1-8-P-1.nd2:0001-0472-0512	355.056		30.912	20	6.46998			MAX_A1-9-P-1.nd2:0001-0540-0512	643.274	520.271	31.853	45	14.1274	10.6887
2022.02.10-A-9-T-MaxIP	689.87		32.14	43	13.379			MAX_A1-8-S-1.nd2:0001-0512-0456	324.552	339.804	31.178	13	4.16961	5.31979		MAX_A1-8-S-1.nd2:0001-0512-0456	324.543		32.047	28	8.73717
2022.02.10-A-9-S1-MaxIP	569.7		34.75	42	12.0863			MAX_A1-9-P-1.nd2:0001-0530-0512	390.036	390.036	31.515	24	7.61542	7.61542		MAX_A1-8-P-1.nd2:0001-0493-0512	352.398	338.471	31.68	21	6.62879	7.68298
2022.02.10-A-9-S-MaxIP	685.72		31.95	44	13.7715			MAX_A1-10-P-1.nd2:0001-0512-0461	410.165		32.796	23	7.01305			MAX_A1-7-T-1.nd2:0001-0543-0512	372.546		31.334	33	10.5317
2022.02.10-A-9-P1-MaxIP	723.69		33.27	46	13.8263			MAX_A1-10-P1-1.nd2:0001-0592-0512	343.945		31.81	34	10.6885			MAX_A1-7-S-1.nd2:0001-0512-0475	426.172		32.299	45	13.9323
2022.02.10-A-9-P-MaxIP	760.66		32.54	40	12.2926			MAX_A1-10-S-1.nd2:0001-0512-0480	342.117	365.409	31.329	17	5.42628	7.70927		MAX_A1-7-P-1.nd2:0001-0512-0447	361.774	386.831	31.434	45	14.3157	12.9266
2022.02.10-A-9-F-MaxIP	669.43	681.84	32.49	34	10.4648	11.4535		MAX_A1-11-P-1.nd2:0001-0489-0512	413.276		31.205	29	9.29338			MAX_A1-6-S-1.nd2:0001-0512-0467	486.009		56.812	49	8.62494
2022.02.10-A-8-T-MaxIP	669.45		32.26	37	11.4693			MAX_A1-11-S-1.nd2:0001-0512-0479	483.484		30.88	29	9.39119			MAX_A1-6-P-1.nd2:0001-0483-0512	371.547	428.778	31.618	34	10.7534	9.68915
2022.02.10-A-8-S-MaxIP	993.17		37.72	46	12.1951			MAX_A1-11-T-1.nd2:0001-0512-0512	544.645		31.626	36	11.383			MAX_A1-5-T-1.nd2:0001-0512-0571	373.338		32.29	19	5.88417
2022.02.10-A-8-P1-MaxIP	720.96	794.527	47.78	62	12.9761	12.2135		MAX_A1-11FT-1.nd2:0001-0512-0556	474.782	479.047	31.238	23	7.36283	9.35761		MAX_A1-5-S-1.nd2:0001-0452-0498	347.691		31.453	45	14.3071
2022.02.10-A-7-T-MaxIP	613.51		31.8	21	6.60377			MAX_A1-12-P-1.nd2:0001-0512-0634	396.676		31.408	19	6.04941			MAX_A1-5-P-1.nd2:0001-0480-0512	319.821	346.95	31.457	29	9.21893	9.80339
2022.02.10-A-7-T-MaxIP	609.6		32.01	12	3.74883			MAX_A1-12-S-1.nd2:0001-0512-0644	495.757		35.764	15	4.19416			MAX_A1-3-P-1.nd2:0001-0512-0464	558.675		31.608	33	10.4404
2022.02.10-A-7-S-MaxIP	745.35		32.8	20	6.09756			MAX_A1-12-T-1.nd2:0001-0512-0581	408.76	433.731	31.374	21	6.69344	5.64567		MAX_A1-2-T-1.nd2:0001-0512-0524	477.741		31.601	44	13.9236
2022.02.10-A-7-P-MaxIP	733.27		32.06	15	4.67873											MAX_A1-2-P-1.nd2:0001-0467-0512	457.873		31.978	53	16.5739	13.646
2022.02.10-A-7-F-MaxIP	696.98	679.742	32.8	32	9.7561	6.177										MAX_A1-1-T-1.nd2:0001-0477-0512	879.712	498.096	31.345	33	10.528
2022.02.10-A-6-S-MaxIP	595.05		32.6	17	5.21472											MAX_A1-1-S-1.nd2:0001-0461-0512	617.343		31.955	51	15.9599
2022.02.10-A-6-P-MaxIP	2227.17	1411.11	31.45	11	3.49762	4.35617										MAX_A1-1-P-1.nd2:0001-0512-0516	374.601		31.998	38	11.8757	12.7879
2022.02.10-A-5-T-MaxIP	617.1		26.44	31	11.7247											MAX_A1-1-P (2)-1.nd2:0001-0512-0413	371.426	560.77		8
2022.02.10-A-5-P1-MaxIP	796.37		31.74	28	8.82168
2022.02.10-A-15-S-MaxIP	645.7		31.65	17	5.37125
2022.02.10-A-15-P1-MaxIP	768.16		31.95	16	5.00782
2022.02.10-A-15-P-MaxIP	598.97	685.26	31.73	23	7.24866	7.63481
2022.02.10-A-14-T-MaxIP	841.22		32.24	46	14.268
2022.02.10-A-14-S-MaxIP	752.4		44.15	72	16.308
2022.02.10-A-14-P-MaxIP	972.67	855.43	31.82	84	26.3985	18.9915
2022.02.10-A-13-T-MaxIP	714.92		31.59	38	12.0291
2022.02.10-A-13-S-MaxIP	955.74		31.61	50	15.8178
2022.02.10-A-13-P1-MaxIP	647.03		32.9	62	18.845
2022.02.10-A-13-P-MaxIP	733.77	3051.46	31.92	43	13.4712	15.0408
2022.02.10-A-12-S-MaxIP	968.26		31.96	43	13.4543
2022.02.10-A-12-P-MaxIP	706.63	837.445	31.39	30	9.55718	11.5058
