# Supplementary material for: Endophilin A1 facilitates organization of the GABAergic postsynaptic machinery to maintain excitation-inhibition balance
Source: eLife. 2025 Oct 2;13:RP102792. doi: 10.7554/eLife.102792 (PMC12490859; doi:10.7554/eLife.102792)
Supplement: Figure 5—source data 3. [file elife-102792-fig5-data3.xlsx]

## Sheet: Fig  5B raw data+normalize
Source	GPN intensity	sγ2 intensity	GPN intensity per neuron	sγ2_intensity per neuron			Source	GPN intensity	sγ2 intensity	GPN intensity per neuron	sγ2_intensity per neuron		normalize
2021.10.28-1-P-MaxIP	897.5	1048.06					2021.10.28-1-P-MaxIP	415.35	426.8	415.35	426.8		GPN_GFP	GPN_GFP-2A-Cre	Average	GPN_GFP	GPN_GFP-2A-Cre		sγ2_GFP	sγ2_GFP-2A-Cre	Average	sγ2_GFP	sγ2_GFP-2A-Cre
2021.10.28-1-P1-MaxIP	682.28	641.11	789.89	844.585			2021.10.28-2-S-MaxIP	511.17	584.97				789.89	426.8	721.143	1.09533	0.591838		844.585	415.35	757.907	1.11436	0.548022
2021.10.28-1-P2-MaxIP	540.21	926.92					2021.10.28-2-T-MaxIP	500.25	667.85	505.71	626.41		608.756	626.41	721.143	0.844155	0.868635		761.01	505.71	757.907	1.00409	0.667245
2021.10.28--1-S-MaxIP	477.24	552.09					2021.10.28-3-P-MaxIP	531.13	395.71				1241.18	507.235	721.143	1.72113	0.703377		1042.94	506.342	757.907	1.37608	0.66808
2021.10.28-1-T-MaxIP 1	446.55	636.87	608.756	761.01			2021.10.28-3-P1-MaxIP	482.82	380.41	506.342	507.235		1277.18	441.103	721.143	1.77105	0.611673		767.693	625.087	757.907	1.01291	0.824753
2021.10.28-4-T-MaxIP	968.44	870.54					2021.10.28-6-S-MaxIP	606.44	413.72				871.666	509.392	721.143	1.20873	0.706368		1010.86	511.84	757.907	1.33375	0.675333
2021.10.28-4-S-MaxIP	1021.23	1009.86					2021.10.28-6-p2-MaxIP	501.12	470.46				623.883	507.525	721.143	0.865131	0.703779		630.823	600.855	757.907	0.832322	0.792782
2021.10.28-4-P1-MaxIP	1476.88	993.79					2021.10.28-6-p-MaxIP	767.7	439.13	625.087	441.103		540.627	334.71	721.143	0.74968	0.464138		575.85	546.525	757.907	0.759789	0.721097
2021.10.28-4-P-MaxIP	1615.73	1208.92					2021.10.28-4-S-MaxIP	352.22	517.55				565.765	651.793	721.143	0.784539	0.903834		765.995	566.63	757.907	1.01067	0.747624
2021.10.28-4-F-MaxIP	1123.62	1131.58	1241.18	1042.94			2021.10.28-4-F-MaxIP	499.22	446.56				1154.48	595.73	721.143	1.6009	0.826092		1290.28	546.803	757.907	1.70242	0.721465
2021.10.28-3-T-MaxIP	1407.11	646.56					2021.10.28-4-P-MaxIP	600.5	544.16				956.03	1058.05	721.143	1.32572	1.46718		603.622	971.51	757.907	0.796433	1.28183
2021.10.28-3-P-MaxIP	1216.62	873.37					2021.10.28-4-T-MaxIP	595.42	529.3	541.512	508.77		973.875	623.027	721.143	1.35046	0.863944		696.59	726.3	757.907	0.919097	0.958297
2021.10.28-3-F-MaxIP	1207.8	783.15	1277.18	767.693			2021.10.28-5-S-MaxIP	645.09	557.25				367.213	523.835	721.143	0.50921	0.726396		564.48	857.275	757.907	0.744788	1.13111
2021.10.28-2-T-MaxIP	633.9	649.3					2021.10.28-5-P-MaxIP	556.62	457.8	600.855	507.525		495.56	443.562	721.143	0.687187	0.615083		576.3	777.925	757.907	0.760383	1.02641
2021.10.28-2-S-MaxIP	1134.78	1188.03					2021.10.28-12-S-MaxIP	502.07	245.28				908.11	479.52	721.143	1.25927	0.664945		786.79	491.22	757.907	1.03811	0.648127
2021.10.28-2-S-MaxIP	1134.78	1188.03					2021.10.28-12-P-MaxIP	590.98	424.14	546.525	334.71		408.08	303.382	721.143	0.56588	0.420697		730.062	460.63	757.907	0.963261	0.607766
2021.10.28-2-P1-MaxIP	604.41	1050.57					2021.10.28-11-T-MaxIP	559.31	698.52				356.4	290.748	721.143	0.494216	0.403176		587.26	604.57	757.907	0.774844	0.797683
2021.10.28-2-P-MaxIP	850.46	978.38	871.666	1010.86			2021.10.28-11-S-MaxIP	410.23	595.66				570.34	749.265	721.143	0.790884	1.039		727.21	741.71	757.907	0.959497	0.978629
2021.10.28-8-T-MaxIP	752.28	647.74					2021.10.28-11-P-MaxIP	730.35	661.2	660.415	732.332		628.327	225.87	721.143	0.871294	0.313211		693.525	576.15	757.907	0.915052	0.760185
2021.10.28-8-S-MaxIP	554.97	593.9					2021.10.28-10-P-MaxIP	647.6	669.08				581.553	553.022	721.143	0.806433	0.766868		701.103	689.343	757.907	0.925051	0.909535
2021.10.28-8-P2-MaxIP	564.4	650.83	623.883	630.823			2021.10.28-10-T-MaxIP	505.84	529.66				503.947	230.937	721.143	0.698817	0.320237		801.17	638.107	757.907	1.05708	0.841932
2021.10.28-8-P1-MaxIP	325.28	447.76					2021.10.28-10-S-MaxIP	486.97	588.45	546.803	595.73		721.143	380.42	721.143	1	0.527524		757.907	674.795	757.907	1	0.89034
2021.10.28-8-P-MaxIP	517.89	561.11					2021.10.28-9-S-MaxIP	826.56	870.5					368.947	721.143		0.511614			673.06	757.907		0.888051
2021.10.28-8-F-MaxIP	528.94	553.76	540.627	575.85			2021.10.28-9-P-MaxIP	1116.46	1245.59	971.51	1058.05			382.637	721.143		0.530598			658.47	757.907		0.8688
2021.10.28-7-T1-MaxIP	518.04	628.42					2021.10.28-8-S-MaxIP	738	638.79
2021.10.28-7-T-MaxIP	490.5	708.32					2021.10.28-8-P1-MaxIP	707.26	606.05
2021.10.28-7-S-MaxIP	536.11	678.49					2021.10.28-8-P-MaxIP	733.64	624.24	726.3	623.027
2021.10.28-7-P-MaxIP	718.41	1048.75	565.765	765.995			2021.10.28-7-S-MaxIP	799.63	503.58
2021.10.28-6-T-MaxIP	1082.11	1151.78					2021.10.28-7-P-MaxIP	914.92	544.09	857.275	523.835
2021.10.28-6-S-MaxIP	1198.25	1318.31					2021.10.28-16-T-MaxIP	762.81	482.94
2021.10.28-6-P-MaxIP	1183.07	1400.74	1154.48	1290.28			2021.10.28-16-S-MaxIP	844.35	392.89
2021.10.28-5-T2-MaxIP	986.74	626.88					2021.10.28-16-P2-MaxIP	733.2	381.04
2021.10.28-5-T1-MaxIP	791.54	536.49					2021.10.28-16-P1-MaxIP	771.34	517.38	777.925	443.562
2021.10.28-5-T-MaxIP	984.52	577.9					2021.10.28-15-S-MaxIP	510.72	449.16
2021.10.28-5-S1-MaxIP	1061.32	673.22	956.03	603.622			2021.10.28-15-P-MaxIP	471.72	509.88	491.22	479.52
2021.10.28-5-S-MaxIP	1171.64	630.37					2021.10.28-14-T-MaxIP	429.61	290.28
2021.10.28-5-P1-MaxIP	1056.35	896.35					2021.10.28-14-S-MaxIP	482.03	275.67
2021.10.28-5-P-MaxIP	926.29	1229.98					2021.10.28-14-P1-MaxIP	506.52	325.2
2021.10.28-5-Fnd2-MaxIP	812.6	401.53	973.875	696.59			2021.10.28-14-P-MaxIP	424.36	322.38	460.63	303.382
2021.10.28-13-T-MaxIP	355.66	606.28					2021.10.28-13-T-MaxIP	495.92	221.76
2021.10.28-13-S-MaxIP	391.88	560.51					2021.10.28-13-S1-MaxIP	667.74	332.31
2021.10.28-13-P-MaxIP	354.1	526.65	367.213	564.48			2021.10.28-13-S1-MaxIP	667.74	332.31
2021.10.28-12-S-MaxIP	495.56	576.3	495.56	576.3			2021.10.28-13-P1-MaxIP	586.88	276.61	604.57	290.748
2021.10.28-15-P-MaxIP	908.11	786.79	908.11	786.79			2021.10.28-8-P1-MaxIP	669.28	848.51
2021.10.28-11-T-MaxIP	452.49	528.36					2021.10.28-8-P-MaxIP	814.14	650.02	741.71	749.265
2021.10.28-11-P1-MaxIP	376.84	746.03					2021.10.28-20-T-MaxIP	599.01	413.22
2021.10.28-11-P1-MaxIP	389.58	758.4					2021.10.28-20-S-MaxIP	575.12	501.58
2021.10.28-11-P-MaxIP	413.41	887.46	408.08	730.062			2021.10.28-19-T-MaxIP	576.15	225.87	576.15	225.87
2021.10.28-9-S-MaxIP	338.68	517.15					2021.10.28-20-P1-MaxIP	902.36	678.93	689.343	553.022
2021.10.28-9-T-MaxIP	342.94	544.71					2021.10.28-19-S-MaxIP	436.5	214.17
2021.10.28-9-P-MaxIP	387.58	699.92	356.4	587.26			2021.10.28-19-P1-MaxIP	757.53	229.29
2021.10.28-10-S-MaxIP	570.34	727.21	570.34	727.21			2021.10.28-19-P-MaxIP	720.29	249.35	638.107	230.937
2021.10.28-18-P1-MaxIP	760.34	746.24					2021.10.28-18-T-MaxIP	633.8	377.59
2021.10.28-18-P1-MaxIP	643.99	659.83					2021.10.28-18-P-MaxIP	715.79	383.25	674.795	380.42
2021.10.28-18-P-MaxIP	538.64	640.82	628.327	693.525			2021.10.28--17-T-MaxIP	692.2	356.43
2021.10.28-17-S-MaxIP	693.04	702.35					2021.10.28-17-T-MaxIP	692.2	356.43
2021.10.28-17-P1-MaxIP	541.09	732.12					2021.10.28-17-S1-MaxIP	634.78	393.98	673.06	368.947
2021.10.28-17-P-MaxIP	510.53	668.84	581.553	701.103			2021.10.28-17-S-MaxIP	688.35	372.05
2021.10.28-16-S-MaxIP	538.82	744.28					2021.10.28-17-P1-MaxIP	564.75	415.62
2021.10.28-16-P1-MaxIP	426.6	774.74					2021.10.28-17-P-MaxIP	678.54	401.31	658.47	382.637
2021.10.28-16-P-MaxIP	546.42	884.49	503.947	801.17

## Sheet: Fig 5C
GFP						GFP-2A-Cre
Source	Pearson's correlation	Pearson's correlation	Mander's overlap			Name	Pearson's correlation	Pearson's correlation	Mander's overlap
2021.10.28-g2647-GPN488-5-S-MaxIP	0.517011		0.650013			2021.10.28-CRE-g2647-GPN555-6-S-MaxIP	0.415027		0.517696
2021.10.28-g2647-GPN488-5-P2-MaxIP	0.592787	0.554899	0.776889	0.713451		2021.10.28-CRE-g2647-GPN555-6-p2-MaxIP	0.537614		0.619327
2021.10.28-g2647-GPN488-5-P1-MaxIP	0.439169		0.657632			2021.10.28-CRE-g2647-GPN555-6-p-MaxIP	0.068554	0.340398	0.34902	0.495348
2021.10.28-g2647-GPN488-5-P-MaxIP	0.311271		0.693734			2021.10.28-CRE-g2647-GPN555-6-p1-MaxIP	0.556221		0.619235
2021.10.28-g2647-GPN488-5-T2-MaxIP	0.575602		0.68476			2021.10.28-CRE-g2647-GPN555-5-P-MaxIP	0.083553		0.281735
2021.10.28-g2647-GPN488-5-T1-MaxIP	0.32646		0.424444			2021.10.28-CRE-g2647-GPN555-6-p1-MaxIP	0.524713	0.388162	0.591543	0.497504
2021.10.28-g2647-GPN488-5-T-MaxIP	0.607962		0.69153			2021.10.28-CRE-g2647-GPN555-5-S-MaxIP	0.323568		0.484011
2021.10.28-g2647-GPN488-5-S1-MaxIP	0.61097		0.713356			2021.10.28-CRE-g2647-GPN555-4-T-MaxIP	0.304139	0.313854	0.469102	0.476556
2021.10.28-g2647-GPN488-5-Fnd2-MaxIP	0.478156	0.478513	0.571371	0.633832		2021.10.28-CRE-g2647-GPN555-4-T-MaxIP	0.303688		0.468821
2021.10.28-g2647-GPN488-4-T-MaxIP	0.636536		0.75559			2021.10.28-CRE-g2647-GPN555-4-S-MaxIP	0.0925		0.270546
2021.10.28-g2647-GPN488-4-S-MaxIP	0.575993		0.728895			2021.10.28-CRE-g2647-GPN555-4-P-MaxIP	0.15799		0.386614
2021.10.28-g2647-GPN488-4-P1-MaxIP	0.551428	0.587986	0.754774	0.74642		2021.10.28-CRE-g2647-GPN555-4-F-MaxIP	0.386913	0.235273	0.503648	0.407407
2021.10.28-g2647-GPN488-4-P-MaxIP	0.445234		0.725436			2021.10.28-CRE-g2647-GPN555-2-S-MaxIP	0.517939		0.761956
2021.10.28-g2647-GPN488-4-F-MaxIP	0.555723	0.500479	0.724115	0.724776		2021.10.28-CRE-g2647-GPN555-2-S-MaxIP	0.525353	0.521646	0.622591	0.692273
2021.10.28-g2647-GPN488-3-T-MaxIP	0.482036		0.654387			2021.10.28-CRE-g2647-GPN555-1-P-MaxIP	0.529016	0.529016	0.582162	0.582162
2021.10.28-g2647-GPN488-3-S-MaxIP	0.473141		0.649515			2021.10.28-CRE-g2647-GPN555-3-P1-MaxIP	0.246844		0.365723
2021.10.28-g2647-GPN488-3-PC-MaxIP	0.303733		0.758573			2021.10.28-CRE-g2647-GPN555-3-P-MaxIP	0.079516	0.16318	0.279816	0.322769
2021.10.28-g2647-GPN488-3-P1-MaxIP	0.310736	0.419637	0.694783	0.689315		2021.10.28-CRE-g2647-GPN555-11-T-MaxIP	0.331886		0.501177
2021.10.28-g2647-GPN488-3-F1-MaxIP	0.454504		0.590288			2021.10.28-CRE-g2647-GPN555-11-S-MaxIP	0.037173		0.223633
2021.10.28-g2647-GPN488-3-F1-MaxIP	0.454504		0.590288			2021.10.28-CRE-g2647-GPN555-11-P-MaxIP	0.088571	0.152543	0.439246	0.388019
2021.10.28-g2647-GPN488-3-F1-MaxIP	0.485979		0.634202			2021.10.28-CRE-g2647-GPN555-10-T-MaxIP	0.266339		0.41923
2021.10.28-g2647-GPN488-3-F-MaxIP	0.497493	0.47312	0.678701	0.62337		2021.10.28-CRE-g2647-GPN555-10-S-MaxIP	0.565765		0.639103
2021.10.28-g2647-GPN488-2-T-MaxIP	0.39317		0.528286			2021.10.28-CRE-g2647-GPN555-10-P-MaxIP	0.292681	0.374928	0.48231	0.513548
2021.10.28-g2647-GPN488-2-S-MaxIP	0.555518		0.751618			2021.10.28-CRE-g2647-GPN555-9-S-MaxIP	0.40734		0.576364
2021.10.28-g2647-GPN488-2-P1-MaxIP	0.646186	0.531625	0.72185	0.667251		2021.10.28-CRE-g2647-GPN555-9-P1-MaxIP	0.509939		0.771788
2021.10.28-g2647-GPN488-2-P-MaxIP	0.485121		0.682591			2021.10.28-CRE-g2647-GPN555-9-P-MaxIP	0.61008		0.646032
2021.10.28-g2647-GPN488-2-C-MaxIP	0.591354		0.709186			2021.10.28-CRE-g2647-GPN555-9-P-MaxIP	0.536205	0.515891	0.759981	0.688541
2021.10.28-g2647-GPN488-1-T-MaxIP	0.522338		0.611434			2021.10.28-CRE-g2647-GPN555-8-S-MaxIP	0.460089		0.60254
2021.10.28-g2647-GPN488-1-S-MaxIP	0.434649		0.535456			2021.10.28-CRE-g2647-GPN555-8-S-MaxIP	0.454845		0.595993
2021.10.28-g2647-GPN488-1-P2-MaxIP	0.455768	0.470918	0.582382	0.576424		2021.10.28-CRE-g2647-GPN555-8-P1-MaxIP	0.3749		0.574639
2021.10.28-g2647-GPN488-1-P1-MaxIP	0.495247		0.606189			2021.10.28-CRE-g2647-GPN555-8-P-MaxIP	0.548976	0.459703	0.662891	0.609016
2021.10.28-g2647-GPN488-1-P-MaxIP	0.543661	0.519454	0.708778	0.657483		2021.10.28-CRE-g2647-GPN555-7-S-MaxIP	0.414561		0.560276
2021.10.28-g2647-GPN488-12-S-MaxIP	0.500468		0.559036			2021.10.28-CRE-g2647-GPN555-7-P-MaxIP	0.215641	0.315101	0.503345	0.53181
2021.10.28-g2647-GPN488-12-P-MaxIP	0.470522	0.485495	0.545492	0.552264		2021.10.28-CRE-g2647-GPN555-16-T-MaxIP	0.465321		0.594805
2021.10.28-g2647-GPN488-11-T-MaxIP	0.362361		0.67937			2021.10.28-CRE-g2647-GPN555-16-S-MaxIP	0.408236		0.512686
2021.10.28-g2647-GPN488-11-P1-MaxIP	0.401949		0.51836			2021.10.28-CRE-g2647-GPN555-16-P2-MaxIP	0.469678	0.447745	0.540138	0.54921
2021.10.28-g2647-GPN488-11-P-MaxIP	0.358822	0.374377	0.519336	0.572355		2021.10.28-CRE-g2647-GPN555-16-P1-MaxIP	0.460686		0.573488
2021.10.28-g2647-GPN488-10-S-MaxIP	0.204443		0.333089			2021.10.28-CRE-g2647-GPN555-16-P-MaxIP	0.432252	0.446469	0.566898	0.570193
2021.10.28-g2647-GPN488-9-T-MaxIP	0.630942		0.664104			2021.10.28-CRE-g2647-GPN555-15-S-MaxIP	0.208202		0.342775
2021.10.28-g2647-GPN488-9-S-MaxIP	0.559943		0.610491			2021.10.28-CRE-g2647-GPN555-15-P-MaxIP	0.094886	0.151544	0.297902	0.320339
2021.10.28-g2647-GPN488-9-P-MaxIP	0.489611	0.560165	0.565913	0.613503		2021.10.28-CRE-g2647-GPN555-14-T-MaxIP	0.250274		0.311119
2021.10.28-g2647-GPN488-8-T-MaxIP	0.258155		0.453007			2021.10.28-CRE-g2647-GPN555-14-S-MaxIP	0.11022		0.218297
2021.10.28-g2647-GPN488-8-S-MaxIP	0.498362		0.580145			2021.10.28-CRE-g2647-GPN555-14-P1-MaxIP	0.102428	0.154307	0.212756	0.247391
2021.10.28-g2647-GPN488-8-P2-MaxIP	0.264823	0.340447	0.464147	0.4991		2021.10.28-CRE-g2647-GPN555-14-P1-MaxIP	0.102428		0.212756
2021.10.28-g2647-GPN488-8-P1-MaxIP	0.332153		0.411266			2021.10.28-CRE-g2647-GPN555-14-P-MaxIP	0.089878	0.0982447	0.182108	0.197432
2021.10.28-g2647-GPN488-8-P-MaxIP	0.272975		0.443512			2021.10.28-CRE-g2647-GPN555-13-T-MaxIP	0.243465		0.315273
2021.10.28-g2647-GPN488-8-F-MaxIP	0.30588	0.303669	0.445346	0.433375		2021.10.28-CRE-g2647-GPN555-13-S1-MaxIP	0.23731		0.370112
2021.10.28-g2647-GPN488-7-T1-MaxIP	0.663422		0.719894			2021.10.28-CRE-g2647-GPN555-13-P1-MaxIP	0.293262	0.258012	0.383553	0.356313
2021.10.28-g2647-GPN488-7-T-MaxIP	0.403096		0.68704			2021.10.28-CRE-g2647-GPN555-12-S-MaxIP	0.350741		0.64409
2021.10.28-g2647-GPN488-7-T-MaxIP	0.446504	0.504341	0.704405	0.70378		2021.10.28-CRE-g2647-GPN555-12-P-MaxIP	0.390354	0.370547	0.499502	0.571796
2021.10.28-g2647-GPN488-7-S1-MaxIP	0.539577		0.615766			2021.10.28-g2647-GPN488-8-PC-MaxIP	0.260122		0.612061
2021.10.28-g2647-GPN488-7-S-MaxIP	0.571496		0.64632			2021.10.28-g2647-GPN488-8-P1-MaxIP	0.566962		0.6823
2021.10.28-g2647-GPN488-7-P-MaxIP	0.569585	0.560219	0.688128	0.650071		2021.10.28-g2647-GPN488-8-P-MaxIP	0.379502	0.402195	0.553963	0.616108
2021.10.28-g2647-GPN488-6-T-MaxIP	0.580318		0.732469			2021.10.28-CRE-g2647-GPN555-20-T-MaxIP	0.405445		0.529261
2021.10.28-g2647-GPN488-6-S-MaxIP	0.534288		0.780437			2021.10.28-CRE-g2647-GPN555-20-S-MaxIP	0.464602		0.569152
2021.10.28-g2647-GPN488-6-P-MaxIP	0.570788	0.561798	0.710783	0.74123		2021.10.28-CRE-g2647-GPN555-20-P1-MaxIP	0.685945	0.518664	0.754714	0.617709
2021.10.28-g2647-GPN488-5-T2-MaxIP	0.558804		0.797029			2021.10.28-CRE-g2647-GPN555-19-S-MaxIP	0.38089		0.426042
2021.10.28-g2647-GPN488-5-T1-MaxIP	0.373179		0.527689			2021.10.28-CRE-g2647-GPN555-19-P1-MaxIP	0.300586		0.66697
2021.10.28-g2647-GPN488-5-T-MaxIP	0.592268		0.6768			2021.10.28-CRE-g2647-GPN555-19-P-MaxIP	0.280793	0.320756	0.671004	0.588005
2021.10.28-g2647-GPN488-5-S1-MaxIP	0.60783		0.711553			2021.10.28-CRE-g2647-GPN555-18-T-MaxIP	0.405346		0.669126
2021.10.28-g2647-GPN488-5-Fnd2-MaxIP	0.471927	0.520802	0.56663	0.65594		2021.10.28-CRE-g2647-GPN555-18-P-MaxIP	0.451399	0.428372	0.531317	0.600221
2021.10.28-g2647-GPN488-18-P1-MaxIP	0.462793		0.61827			2021.10.28-CRE-g2647-GPN555-17-T-MaxIP	0.361956		0.470331
2021.10.28-g2647-GPN488-18-P1-MaxIP	0.451399		0.60392			2021.10.28-CRE-g2647-GPN555-17-S1-MaxIP	0.308191		0.439514
2021.10.28-g2647-GPN488-18-P-MaxIP	0.463967	0.459386	0.588055	0.603415		2021.10.28-CRE-g2647-GPN555-17-S-MaxIP	0.339102		0.445863
2021.10.28-g2647-GPN488-17-S-MaxIP	0.466909		0.603912			2021.10.28-CRE-g2647-GPN555-17-P1-MaxIP	0.386064		0.495336
2021.10.28-g2647-GPN488-17-P1-MaxIP	0.38004		0.55452			2021.10.28-CRE-g2647-GPN555-17-P-MaxIP	0.440139	0.36709	0.527833	0.475775
2021.10.28-g2647-GPN488-17-P-MaxIP	0.361403	0.402784	0.524067	0.560833
2021.10.28-g2647-GPN488-16-S-MaxIP	0.531364		0.627545
2021.10.28-g2647-GPN488-16-P1-MaxIP	0.397136		0.521466
2021.10.28-g2647-GPN488-16-P-MaxIP	0.518107		0.623638
2021.10.28-g2647-GPN488-16-P-MaxIP	0.536589	0.495799	0.634117	0.601692
2021.10.28-g2647-GPN488-15-S-MaxIP	0.419329		0.605665
2021.10.28-g2647-GPN488-15-P-MaxIP	0.438911		0.667598	0.636632
2021.10.28-g2647-GPN488-14-P-MaxIP	0.34019		0.445563	0.445563
2021.10.28-g2647-GPN488-13-T-MaxIP	0.477407		0.551292
2021.10.28-g2647-GPN488-13-S-MaxIP	0.475874		0.556545
2021.10.28-g2647-GPN488-13-P-MaxIP	0.556686		0.618395
2021.10.28-g2647-GPN488-13-P-MaxIP	0.556686	0.516663	0.618395	0.618395
2021.10.28-g2647-GPN488-12-T-MaxIP	0.407762		0.485178
2021.10.28-g2647-GPN488-12-S-MaxIP	0.511755		0.565893
2021.10.28-g2647-GPN488-12-P-MaxIP	0.471682	0.463733	0.54537	0.532147
2021.10.28-g2647-GPN488-11-T-MaxIP	0.357537		0.434966
2021.10.28-g2647-GPN488-11-P1-MaxIP	0.404788		0.522693
2021.10.28-g2647-GPN488-11-P-MaxIP	0.354623		0.516833	0.491497

## Sheet: Fig 5I
	EEN1	GST	normalize		normalize
FL	9814.24	10262.5	0.956322			repeat1	repeat2	repeat3	Average	repeat1	repeat2	repeat3
G	4367.3	9372.47	0.465971		FL	0.956322	1.00155	0.936242	0.964703	0.991312	1.03819	0.970497
C	4798.08	12653.7	0.379185		G	0.465971	0.95628	0.796973	0.964703	0.48302	0.991268	0.826133
E	8486.73	11424.8	0.742836		C	0.379185	0.13104	0.0553489	0.964703	0.393059	0.135835	0.057374
					E	0.742836	0.411989	0.453691	0.964703	0.770014	0.427063	0.470291
FL	20960.8	20928.4	1.00155
G	16497.1	17251.3	0.95628
C	3110.88	23739.8	0.13104
E	8113.11	19692.6	0.411989
FL	18475.5	19733.6	0.936242
G	11679	14654.1	0.796973
C	2196.02	39675.9	0.0553489
E	10969.1	24177.4	0.453691
