# Supplementary material for: Endophilin A1 facilitates organization of the GABAergic postsynaptic machinery to maintain excitation-inhibition balance
Source: eLife. 2025 Oct 2;13:RP102792. doi: 10.7554/eLife.102792 (PMC12490859; doi:10.7554/eLife.102792)
Supplement: Figure 5—source data 4. [file elife-102792-fig5-data4.xlsx]

## Sheet: Fig 5E-soma
GFP + Vector							GFP + Vector								normalize
Source	mean intensity	area	number	number of per soma	number of per 30 μm²			mean intensity	area	number	number of per 10 μm	number of per neuron			mean intensity							number
MAX_1-C-1.nd2:0001-0432-0512	268.187	444.735	28	0.0629588	1.88877		MAX_1-C-1.nd2:0001-0585-0512	269.387	490.571	27	0.0550379	1.65114			GFP + Vector	GFP + EndoA1	Average	GFP + Vector	GFP + EndoA1			GFP + Vector	GFP + EndoA1	Average	GFP + Vector	GFP + EndoA1
MAX_2-C-1.nd2:0001-0585-0473	353.187	328.761	21	0.0638762	1.91629		MAX_2-C-1.nd2:0001-0512-0518	247.821	356.16	16	0.0449236	1.34771			268.187	435.415	329.556	0.813784	1.32122			1.88877	3.22586	2.34982	0.803792	1.37281
MAX_3-C-1.nd2:0001-0580-0444	408.184	218.59	17	0.0777712	2.33314		MAX_3-C-1.nd2:0001-0512-0512	199.646	544.711	25	0.0458959	1.37688			353.187	554.61	329.556	1.07171	1.6829			1.91629	3.31497	2.34982	0.815503	1.41073
MAX_4-C-1.nd2:0001-0382-0488	421.625	323.612	22	0.0679826	2.03948		MAX_4-C-1.nd2:0001-0430-0587	183.612	300.002	17	0.0566663	1.69999			408.184	275.325	329.556	1.23859	0.835443			2.33314	1.26505	2.34982	0.9929	0.538359
MAX_5-C-1.nd2:0001-0486-0423	340.307	236.803	36	0.152025	4.56075		MAX_6-C-1.nd2:0001-0587-0517	303.545	309.902	39	0.125846	3.77539			421.625	410.9	329.556	1.27937	1.24683			2.03948	2.07595	2.34982	0.86793	0.88345
MAX_7-C-1.nd2:0001-0467-0368	353.729	255.974	17	0.066413	1.99239		MAX_7-C-1.nd2:0001-0530-0434	369.92	129.583	28	0.216078	6.48233			340.307	525.515	329.556	1.03262	1.59462			4.56075	4.2484	2.34982	1.94089	1.80797
MAX_6-C-1.nd2:0001-0367-0371	355.328	291.384					MAX_8-C-1.nd2:0001-0615-0572	423.689	104.315	32	0.306763	9.2029			353.729	462.433	329.556	1.07335	1.4032			1.99239	3.86497	2.34982	0.847891	1.64479
MAX_8-cC-1.nd2:0001-0481-0463	344.64	259.459	9	0.0346876	1.04063										344.64	255.53	329.556	1.04577	0.775377			1.04063	2.35341	2.34982	0.442854	1.00153
MAX_9-C-1.nd2:0001-0507-0575	359.367	283.487	11	0.0388025	1.16407										359.367	239.203	329.556	1.09046	0.725835			1.16407	2.16053	2.34982	0.495389	0.919445
MAX_11-C-1.nd2:0001-0526-0558	391.626	359.636	56	0.155713	4.67139										391.626	332.325	329.556	1.18835	1.0084			4.67139	2.73473	2.34982	1.98798	1.1638
MAX_14-C-1.nd2:0001-0470-0651	317.79	271.32	10	0.0368568	1.10571										317.79	487.719	329.556	0.964298	1.47993			1.10571	3.86495	2.34982	0.470549	1.64479
MAX_15-C-1.nd2:0001-0440-0434	349.967	366.301	11	0.0300299	0.900898										349.967	380.563	329.556	1.06194	1.15478			0.900898	2.4512	2.34982	0.38339	1.04314
															355.328	396.321	329.556	1.0782	1.20259			1.65114	5.91328	2.34982	0.702665	2.51648
GFP + EndoA1							GFP + EndoA1								269.387	409.406	329.556	0.817425	1.2423			1.34771	8.12281	2.34982	0.573537	3.45678
Source	mean intensity	area	number	number of per soma	number of per neuron			mean intensity	area	number	number of per 10 μm	number of per neuron			247.821	415.016	329.556	0.751985	1.25932			1.37688	5.83098	2.34982	0.58595	2.48146
MAX_12-P-1.nd2:0001-0633-0492	435.415	232.496	25	0.107529	3.22586		MAX_8-C-1-1.nd2:0001-0554-0401	409.406	329.766	65	0.197109	5.91328			199.646	352.679	329.556	0.605804	1.07017			1.69999	6.15682	2.34982	0.723455	2.62012
MAX_11-C-1.nd2:0001-0415-0550	554.61	126.698	14	0.110499	3.31497		MAX_4-C-1.nd2:0001-0481-0448	415.016	269.611	73	0.27076	8.12281			183.612	454.689	329.556	0.55715	1.3797			3.77539	1.38598	2.34982	1.60667	0.589823
MAX_10-C-1.nd2:0001-0392-0425	275.325	213.431	9	0.0421682	1.26505		MAX_5-C-1.nd2:0001-0569-0441	352.679	149.203	29	0.194366	5.83098			303.545	307.098	329.556	0.921074	0.931855			6.48233	5.58741	2.34982	2.75865	2.3778
MAX_9-C-1.nd2:0001-0385-0523	410.9	130.061	9	0.0691983	2.07595		MAX_6-C-1.nd2:0001-0512-0512	454.689	458.029	94	0.205227	6.15682			369.92	503.194	329.556	1.12248	1.52689			2.34982	6.1637	2.34982	1	2.62305
MAX_8-C-1.nd2:0001-0507-0560	525.515	148.291	21	0.141613	4.2484		MAX_3-C-1.nd2:0001-0444-0418	307.098	281.39	13	0.0461992	1.38598			423.689	560.867	329.556	1.28564	1.70189
MAX_7-C-1.nd2:0001-0521-0536	396.321	306.274					MAX_2-C-1.nd2:0001-0512-0561	503.194	279.199	52	0.186247	5.58741
MAX_6-C-1.nd2:0001-0552-0389	462.433	287.195	37	0.128832	3.86497		MAX_1-C-1.nd2:0001-0426-0459	560.867	306.634	63	0.205457	6.1637
MAX_5-C-1.nd2:0001-0364-0485	255.53	242.202	19	0.0784469	2.35341
MAX_4-C-1.nd2:0001-0537-0542	239.203	319.366	23	0.0720177	2.16053
MAX_3-C-1.nd2:0001-0571-0432	332.325	219.4	20	0.0911577	2.73473
MAX_2-P-1.nd2:0001-0549-0437	487.719	225.1	29	0.128832	3.86495
MAX_1-C-1.nd2:0001-0512-0519	380.563	379.406	31	0.0817067	2.4512

## Sheet: Fig 5E raw data-dendrite
GFP + Vector								GFP + Vector								GFP + Vector
Source	Mean Intensity	Mean Intensity of per neuron	number	length	number of per 10 μm	number of per neuron		Source	Mean Intensity	Mean Intensity of per neuron	number	length	number of per 10 μm	number of per neuron		Source	Mean Intensity	Mean Intensity of per neuron	number	length	number of per 10 μm	number of per neuron
MAX_1-F-1-1.nd2:0001-0501-0549	429.913		15	32.302	4.64368			MAX_1-F-1.nd2:0001-0512-0547	398.682		10	31.518	3.17279			MAX_1-P-1.nd2:0001-0440-0540	565.908		9	25.937	3.46995
MAX_1-P-1.nd2:0001-0512-0563	359.222		14	31.751	4.40931			MAX_1-P-1.nd2:0001-0570-0512	456.984		38	31.534	12.0505			MAX_1-S-1.nd2:0001-0446-0451	510.627		4	31.669	1.26306
MAX_1-S-1.nd2:0001-0512-0574	511.323		17	33.39	5.09134			MAX_1-S-1.nd2:0001-0512-0272	341.508		22	47.748	4.60752			MAX_1-S1-1.nd2:0001-0512-0459	566.92		10	31.456	3.17904
MAX_1-S1-1.nd2:0001-0512-0490	375.922		11	50.218	2.19045			MAX_1-S1-1.nd2:0001-0512-0498	446.634		21					MAX_1-T-1.nd2:0001-0512-0472	451.247	523.676	3	31.28	0.959079	2.21778
MAX_1-T-1.nd2:0001-0512-0595	361.549	407.586	4	31.637	1.26434	3.51982		MAX_1-T-1.nd2:0001-0512-0493	299.829	388.727	8	32.266	2.47939	5.57755		MAX_2-P-1.nd2:0001-0512-0680	559.821		14	31.798	4.40279
MAX_2-F-1.nd2:0001-0512-0528	292.938		2	31.55	0.633914			MAX_2-F-1.nd2:0001-0512-0466	548.562		34	58.931	5.76946			MAX_2-S-1.nd2:0001-0512-0442	435.649		2	31.648	0.631951
MAX_2-P-1.nd2:0001-0466-0512	331.387		3	31.755	0.944733			MAX_2-P-1.nd2:0001-0504-0512	476.613		16	33.644	4.75568			MAX_2-T-1.nd2:0001-0512-0503	579.216	524.895	10	30.704	3.2569	2.76388
MAX_2-P1-1.nd2:0001-0512-0543	449.319		16	32.755	4.88475			MAX_2-S-1.nd2:0001-0512-0469	316.717		15	31.507	4.76085	5.09533		MAX_3-P-1.nd2:0001-0571-0512	866.674		18	31.381	5.73595
MAX_2-S-1.nd2:0001-0683-0512	409.715		9	31.741	2.83545			MAX_2-T-1.nd2:0001-0512-0512	282.603	406.124	14					MAX_3-S-1.nd2:0001-0512-0561	606.34		15	31.565	4.7521
MAX_2-S1-1.nd2:0001-0512-0477	319.126		4	33.845	1.18186			MAX_3-P-1.nd2:0001-0512-0523	397.817		25	30.76	8.12744			MAX_3-T-1.nd2:0001-0512-0478	928.718	800.577	28	31.066	9.01307	6.50037
MAX_2-T-1.nd2:0001-0583-0561	526.867	388.225	12	27.464	4.36936	2.47501		MAX_3-P1-1.nd2:0001-0516-0567	252.388		12					MAX_4-P-1.nd2:0001-0512-0517	832.918		30	30.977	9.6846
MAX_3-F-1.nd2:0001-0519-0488	338.737		2	31.869	0.627569			MAX_3-T-1.nd2:0001-0512-0459	386.2	345.468	12	33.376	3.5954	5.86142		MAX_4-S-1.nd2:0001-0442-0512	687.82		12	30.682	3.91109
MAX_3-P-1.nd2:0001-0509-0490	410.849		9	30.552	2.9458			MAX_4-P-1.nd2:0001-0512-0481	383.417		10	31.673	3.15726			MAX_4-T-1.nd2:0001-0524-0512	733.07	751.269	16	30.859	5.18487	6.26019
MAX_3-S-1.nd2:0001-0506-0512	350.342		7	29.625	2.36287			MAX_4-S-1.nd2:0001-0512-0535	266.779		12	31.367	3.82568			MAX_5-F-1.nd2:0001-0400-0512	616.679		5	31.686	1.57798
MAX_3-T-2-1.nd2:0001-0506-0512	383.057	370.746	5	31.744	1.5751	1.87783		MAX_4-T-1.nd2:0001-0588-0512	392.117	347.438	18	31.988	5.62711	4.20335		MAX_5-P-1.nd2:0001-0467-0512	726.11		20	30.491	6.55931
MAX_4-F-1-1.nd2:0001-0486-0512	470.32		8	31.323	2.55403			MAX_5-F-1.nd2:0001-0402-0512	587.266		17	24.375	6.97436			MAX_5-P1-1.nd2:0001-0512-0386	731.152		17	43.644	3.89515
MAX_4-P-1.nd2:0001-0493-0512	440.432		9	31.377	2.86834			MAX_5-F1-1.nd2:0001-0512-0215	583.806		12	31.543	3.80433			MAX_5-S-1.nd2:0001-0542-0506	692.213		9	31.639	2.84459
MAX_4-S-1.nd2:0001-0512-0352	338.065	416.272	15	58.222	2.57635	2.66624		MAX_5-P-1.nd2:0001-0512-0522	496.823		31	31.227	9.92731			MAX_5-T-1.nd2:0001-0505-0512	580.414	669.314	7	34.394	2.03524	3.38246
MAX_5-P-1.nd2:0001-0423-0512	339.432		15	31.369	4.78179			MAX_5-S-1.nd2:0001-0522-0512	463.347		15	31.217	4.80507			MAX_6-P-1.nd2:0001-0530-0512	706.366		10	30.745	3.25256
MAX_5-S-1.nd2:0001-0511-0512	357.84		6	31.104	1.92901			MAX_5-T-1.nd2:0001-0512-0404	724.839	571.216	29	31.963	9.07299	6.91681		MAX_6-S-1.nd2:0001-0512-0449	806.534		10	31.674	3.15716
MAX_5-T-1.nd2:0001-0519-0512	378.717	358.663	8	48.516	1.64894	2.78658		MAX_6-P-1.nd2:0001-0488-0512	486.66		39	31.518	12.3739			MAX_6-T-1.nd2:0001-0501-0512	580.045	697.648	6	33.207	1.80685	2.73886
MAX_6-P-1.nd2:0001-0449-0510	344.041		28	80.197	3.4914			MAX_6-P1-1.nd2:0001-0512-0528	457.983		30	31.375	9.56175			MAX_7-Pnd2-1.nd2:0001-0512-0487	566.202		8	34.413	2.3247
MAX_6-S-1.nd2:0001-0603-0512	343.408		13	30.809	4.21955			MAX_6-S-1.nd2:0001-0512-0600	427.854		19	33.691	5.63949			MAX_7-S-1.nd2:0001-0512-0584	541.448		3	31.136	0.963515
MAX_6-T-1.nd2:0001-0499-0512	363.796	350.415	7	31.617	2.214	3.85547		MAX_6-T-1.nd2:0001-0512-0456	471.578	461.019	14	31.722	4.41334	7.99712		MAX_7-T-1.nd2:0001-0512-0584	804.186	637.279	7	31.68	2.2096	1.8326
MAX_7-F-1.nd2:0001-0501-0512	387.834		5	31.641	1.58023			MAX_7-P-1.nd2:0001-0512-0442	492.651		37	48	7.70833			MAX_8-F-1.nd2:0001-0438-0512	500.315		8	31.525	2.53767
MAX_7-P-1.nd2:0001-0512-0465	322.386		7	31.719	2.20688			MAX_7-S-1.nd2:0001-0500-0512	451.324		39	31.117	12.5333			MAX_8-P-1.nd2:0001-0343-0512	622.014		18	32.107	5.60625
MAX_7-S-1.nd2:0001-0456-0512	520.602		7	31.223	2.24194	2.00968		MAX_7-T-1.nd2:0001-0512-0624	373.125	439.033	27	64.193	4.20607	8.14925		MAX_8-S-1.nd2:0001-0476-0512	704.988		14	29.619	4.7267	4.29021
MAX_7-T-1.nd2:0001-0516-0512	378.806	402.407	0	31.462				MAX_8-P-1.nd2:0001-0447-0512	615.591		44	31.139	14.1302			MAX_8-T-1.nd2:0001-0518-0512	709.403	634.18
MAX_8-F-1.nd2:0001-0531-0512	644.369		9	31.868	2.82415			MAX_8-S-1.nd2:0001-0512-0729	376.421	496.006	24	35.048	6.84775	10.489		MAX_9-F-1.nd2:0001-0433-0448	559.49		7	27.777	2.52007
MAX_8-P-1.nd2:0001-0632-0512	332.857		5	31.934	1.56573											MAX_9-P-1.nd2:0001-0512-0575	704.853		19	31.298	6.07068
MAX_8-P1-1.nd2:0001-0525-0512	337.885		4	31.138	1.2846											MAX_9-S-1.nd2:0001-0512-0486	624.127		10	31.33	3.19183
MAX_8-S-1.nd2:0001-0492-0512	513.725		7	31.803	2.20105											MAX_9-T-1.nd2:0001-0512-0578	634.009	630.62	6	31.411	1.91016	3.42318
MAX_8-S1-1.nd2:0001-0681-0512	401.252		9	32.911	2.73465											MAX_10-F-1.nd2:0001-0512-0563	649.876		9	31.245	2.88046
MAX_8-T-1.nd2:0001-0671-0512	367.808	432.983	6	30.958	1.93811	2.09138										MAX_10-F1-1.nd2			5	31.562	1.58418
MAX_9-P-1.nd2:0001-0512-0644	402.961		6	31.615	1.89783											MAX_10-P-1.nd2:0001-0512-0440	954.646		18	29.6	6.08108
MAX_9-S-1.nd2:0001-0756-0512	512.386		7	31.378	2.23086											MAX_10-S-1.nd2:0001-0466-0512	726.534		20	31.384	6.37267
MAX_9-T-1.nd2:0514-0687	568.544	494.63	8	32.088	2.49314	2.20728										MAX_10-T-1.nd2:0001-0512-0533	703.928	758.746	7	30.769	2.27502	3.83868
MAX_10-F-1.nd2:0001-0512-0624	471.964		5	31.665	1.57903											MAX_11-F-1.nd2:0001-0512-0522	714.174		12	31.44	3.81679
MAX_10-F1-1.nd2:0001-0512-0682	432.002		7	31.896	2.19463											MAX_11-P-1.nd2:0001-0600-0512	934.876		19	30.97	6.13497
MAX_10-P-1.nd2:0001-0512-0569	326.047		8	32.596	2.45429											MAX_11-S-1.nd2:0001-0433-0512	644.909		7	31.321	2.23492
MAX_10-S-1.nd2:0001-0512-0560	362.907		2	31.185	0.641334											MAX_11-T-1.nd2:0001-0461-0512	631.028	731.247	5	30.724	1.62739	4.06223
MAX_10-T-1.nd2:0001-0512-0689	321.043	382.793	6	31.894	1.88123	1.7501										MAX_12-P-1.nd2:0001-0486-0512	799.341		22	31.159	7.06056
MAX_11-P-1.nd2:0001-0671-0552	352.361		12	29.412	4.07997											MAX_12-S-1.nd2:0001-0427-0512	772.261		24	32.008	7.49813
MAX_11-T-1.nd2:0001-0624-0521	381.529	366.945	6	31.333	1.91491	2.99744										MAX_12-T-1.nd2:0001-0509-0512	773.176	781.593	27	0.976	276.639	97.066
MAX_12-P-1.nd2:0001-0579-0512	569.127		18
MAX_12-S-1.nd2:0001-0574-0512	390.196		6	31.765	1.88887
MAX_12-T-1.nd2:0001-0368-0512	601.305	520.209	7	31.869	2.19649	2.04268
MAX_13-P-1.nd2:0001-0512-0560	418.178		7	30.819	2.27133
MAX_10-T-1.nd2:0001-0512-0689	322.394		11	31.577	3.48355
MAX_13-S-1.nd2:0001-0512-0681	488.807	409.793	9	31.572	2.85063	2.8685
MAX_14-P-1.nd2:0001-0564-0512	360.851		6	30.736	1.95211
MAX_14-S-1.nd2:0001-0359-0512	394.949		4	55.602	0.719399
MAX_14-S1-1.nd2:0001-0658-0512	326.44		4	31.195	1.28226
MAX_14-T-1.nd2:0001-0501-0512	377.359	364.9	8	42.243	1.8938	1.46189
MAX_15-P-1.nd2:0001-0512-0569	357.289		20	30.279	6.60524
MAX_15-T-1.nd2:0001-0512-0571	353.085	355.187	14	32.124	4.35811	5.48168
GFP + EndoA1								GFP + EndoA1								GFP + EndoA1
Source	Mean Intensity	Mean Intensity of per neuron	number	length	number of per 10 μm	number of per neuron		Source	Mean Intensity	Mean Intensity of per neuron	number	length	number of per 10 μm	number of per neuron		Source	Mean Intensity	Mean Intensity of per neuron	number	length	number of per 10 μm	number of per neuron
MAX_1-F-1.nd2:0001-0487-0512	380.33		13	34.125	3.80952			MAX_4-P-1.nd2:0001-0676-0512	456.224		24	31.584	7.59878			MAX_1-P-1.nd2:0001-0512-0445	659.342		31	31.656	9.79277
MAX_1-P-1.nd2:0001-0512-0469	416.952		16	31.299	5.11198			MAX_6-P-1.nd2:0001-0367-0512	656.077		18	31.65	5.6872	6.64299		MAX_1-S-1.nd2:0001-0512-0448	571.706		8	31.045	2.5769	6.18484
MAX_1-S-1.nd2:0001-0512-0579	472.787		18	31.359	5.73998			MAX_6-P1-1.nd2:0001-0548-0484	640.782		45	31.391	14.3353			MAX_1-T-1.nd2:0001-0533-0512	666.909	632.652	18
MAX_1-T-1.nd2:0001-0512-0516	305.428	393.874	11	31.672	3.4731	4.53365		MAX_6-S-1.nd2:0001-0512-0405	396.487		26	29.346	8.85981			MAX_2-P-1.nd2:0001-0512-0543	819.25		25	31.119	8.03368
MAX_2-P1-1-1.nd2:0001-0489-0512	428.725		12	32.098	3.73855			MAX_6-T-1.nd2:0001-0385-0512	468.665	523.647	9	31.9	2.82132			MAX_2-S-1.nd2:0001-0375-0512	952.406		32	37.954	8.43126
MAX_2-S-2-1.nd2:0001-0326-0512	482.883		17	32.449	5.23899			MAX_7-F-1.nd2:0001-0465-0512	417.519		37	37.628	9.8331	8.96239		MAX_2-T-1.nd2:0001-0512-0499	772.571	848.076	20	31.479	6.35344	7.60613
MAX_2-T-1.nd2:0001-0512-0592	454.21	455.273	9	31.351	2.87072			MAX_7-P-1.nd2:0001-0512-0438	403.646		14	33.911	4.12845			MAX_3-P-1.nd2:0001-0512-0445	807.681		26	31.768	8.18434
MAX_3-P-1.nd2:0001-0512-0489	369.513		17	31.368	5.41954			MAX_7-P1-1.nd2:0001-0512-0364	517.131		44	31.836	13.8208			MAX_3-S-1.nd2:0001-0368-0512	712.474	712.474	13	43.339	2.99961	5.59197
MAX_3-S-1.nd2:0001-0512-0511	383.089		14	30.711	4.55863			MAX_7-S-1.nd2:0001-0512-0571	357.897		9	32.44	2.77435			MAX_4-P-1.nd2:0001-0512-0423	1357.13		47	34.747	13.5263
MAX_3-T-1.nd2:0001-0499-0512	403.322	385.308	11	31.129	3.53368	4.22668		MAX_7-T-1.nd2:0001-0503-0325	494.011	438.041	34	34.762	9.7808			MAX_4-S-1.nd2:0001-0569-0548	657.621		2	29.591	0.675881
MAX_4-F-1.nd2:0001-0512-0716	318.204		10	32.177	3.10781			MAX_8-P-1.nd2:0001-0509-0437	719.289		30	37.82	7.93231	7.68735		MAX_4-T-1.nd2:0001-0512-0513	618.034	877.597	12	51.161	2.34554	5.51592
MAX_4-S-1.nd2:0001-0519-0512	339.672		14	31.145	4.4951			MAX_8-S-1.nd2:0001-0501-0512	674.486		44	31.283	14.0651			MAX_5-P-1.nd2:0001-0512-0533	1056.13		30	31.044	9.6637
MAX_4-S1-1.nd2:0001-0504-0512	298.202		5	31.414	1.59165			MAX_8-T-1.nd2:0001-0512-0258	424.775	606.183	22	31.429	6.9999			MAX_5-S-1.nd2:0001-0512-0464	1045.26		12	31.672	3.78884
MAX_4-T-1.nd2:0001-0539-0512	306.119	315.549	6	32.035	1.87295	2.76688		MAX_5-P-1.nd2:0001-0512-0424	526.568		30	46.782	6.41272	9.15926		MAX_5-T-1.nd2:0001-0512-0411	882.869	994.753	8	34.672	2.30734	5.25329
MAX_6-P-1.nd2:0001-0512-0476	405.785		5	33.529	1.49125			MAX_5-S-1.nd2:0001-0512-0429	690.489	608.529	42	31.365	13.3907			MAX_6-P-1.nd2:0001-0426-0512	827.039		20	31.613	6.32651
MAX_6-S-1.nd2:0001-0457-0512	457.389		6	31.779	1.88804			MAX_4-T-1.nd2:0001-0512-0550	519.614	487.919	18	44.303	4.06293	8.72683		MAX_6-S-1.nd2:0001-0401-0512	1130.67		26	30.773	8.44897
MAX_6-T-1.nd2:0001-0551-0512	481.745	448.306	6	32.248	1.86058	1.74662		MAX_1-F-1.nd2:0001-0443-0512	657.063		25	32.271	7.74689			MAX_6-T-1.nd2:0001-0360-0512	623.901	623.901	9	31.156	2.88869	5.88806
MAX_7-F-1.nd2:0001-0512-0495	423.761		11	31.505	3.49151			MAX_1-P-1.nd2:0001-0467-0512	610.541		54	31.229	17.2916			MAX_7-F-1.nd2:0001-0512-0577	847.153		14	30.84	4.53956
MAX_7-P-1-1.nd2:0001-0512-0576	409.874		20	31.475	6.35425			MAX_1-S-1.nd2:0001-0452-0512	874.969		41	32.371	12.6657			MAX_7-P-1.nd2:0001-0457-0512	901.844		33	31.004	10.6438
MAX_7-S-1.nd2:0001-0512-0537	403.299		12	31.702	3.78525			MAX_1-T-1.nd2:0001-0512-0380	495.034	659.402	11	30.464	3.61082	10.3287		MAX_7-S-1.nd2:0001-0512-0467	907.191		23	31.309	7.34613
MAX_7-T-1-1.nd2:0001-0512-0671	465.515	425.612	10	31.422	3.18248	4.20337		MAX_2-P-1.nd2:0001-0512-0448	820.325		56	31.837	17.5896			MAX_7-T-1.nd2:0001-0512-0539	1032.31	922.125	25	31.434	7.95317	7.62066
MAX_8-P-1.nd2:0003-0512-0490	534.266		12	31.701	3.78537			MAX_2-S-1.nd2:0001-0512-0353	1099.11	959.717	36	32.466	11.0885	14.3391		MAX_8-Pnd2-1.nd2:0001-0512-0512	806.913		33	68.918	4.7883
MAX_8-S-1.nd2:0001-0512-0532	535.872		12	31.93	3.75822			MAX_3-S-1-1.nd2:0001-0512-0345	482.274		30	32.658	9.18611			MAX_8-S-1.nd2:0001-0468-0512	769.016		6	30.659	1.95701
MAX_8-T-1.nd2:0001-0512-0561	405.923	492.02	8	31.558	2.53501	3.35954		MAX_3-P-1.nd2:0001-0447-0512	471.918	477.096	30	30.764	9.75166	9.46888		MAX_8-T-1.nd2:0001-0512-0568	1164.09	913.34	13	31.889	4.07664	3.60732
			6	31.27	1.91877											MAX_9-F-1.nd2:0001-0502-0512	826.344		16	30.774	5.19919
MAX_9-P-1.nd2:0001-0512-0530	517.67		15	32.545	4.609											MAX_9-P-1.nd2:0001-0512-0467	1112.65		22	31.547	6.97372
MAX_9-S-1.nd2:0001-0512-0554	416.828		7	31.678	2.20974											MAX_9-S-1.nd2:0001-0512-0468	695.863	878.286	7	32.486	2.15477
MAX_9-T-1.nd2:0001-0512-0549	540.893	491.797	7	31.23	2.24143	2.74474										MAX_9-T-1.nd2:0001-0462-0512	2121		19	30.007	6.33186	5.16489
MAX_10-F-1.nd2:0001-0533-0495	331.231		3	31.128	0.963763											MAX_10-F-1.nd2:0001-0512-0501	677.769		6	30.839	1.94559
MAX_10-P-1.nd2:0001-0510-0512	342.648		10	31.27	3.19795											MAX_10-P-1.nd2:0001-0493-0512	911.732		46	32.092	14.3338
MAX_10-S-1.nd2:0001-0512-0471	382.18	352.02	16	31.62	5.06009	3.07393										MAX_10-S-1.nd2:0001-0491-0512	983.488		41	31.181	13.149
MAX_11-F-1.nd2:0001-0488-0476	392.93		5	27.772	1.80037											MAX_10-T-1.nd2:0001-0512-0488	848.804	855.448	16	31.09	5.14635	8.64369
MAX_11-P-1.nd2:0001-0714-0512	554.51		20	31.639	6.32131											MAX_11-F-1.nd2:0001-0454-0647	1069.47		11	40.422	2.72129
MAX_11-P1-1.nd2:0001-0533-0512	506.229		22	48.842	4.50432											MAX_11-P-1.nd2:0001-0515-0512	909.627		19	31.059	6.11739
MAX_11-S-1.nd2:0001-0301-0512	491.221		11	44.876	2.4512											MAX_11-S-1.nd2:0001-0512-0472	769.759		16	31.735	5.04175
MAX_11-T-1.nd2:0001-0512-0556	573.395	503.657	3	31.94	0.939261	3.20329										MAX_11-S1-1.nd2:0001-0434-0512	758.345		10	31.041	3.22155
MAX_12-P1-1.nd2:0001-0666-0512	446.205		14	31.699	4.41654											MAX_11-T-1.nd2:0001-0512-0722	728.7	847.18	34	51.756	6.56929	4.73425
MAX_12-S-1.nd2:0001-0518-0512	494.524		11	31.373	3.5062
MAX_12-T-1.nd2:0001-0542-0512	362.442	434.39	6	32.006	1.87465	3.2658

## Sheet: Fig 5E normalize-dendrite
GFP + Vector_intensity	GFP + EndoA1_intensity		GFP + Vector_number	GFP + EndoA1_number
1.59045	1.9762		2.6282	3.59291
1.55273	1.9066		2.04194	2.58805
1.50734	1.83192		2.00382	2.3726
1.49249	1.81446		1.73313	2.29501
1.45271	1.74482		1.62878	2.24569
1.38596	1.74345		1.5686	2.18666
1.32967	1.69945		1.46868	2.16583
1.26603	1.68481		1.39755	1.9262
1.25988	1.68303		1.37353	1.90949
1.2528	1.41542		1.27672	1.90585
1.13479	1.30998		1.07499	1.66452
1.04277	1.25684		1.05322	1.54972
1.04035	1.23946		1.01786	1.47536
1.03346	1.20892		0.966058	1.40117
0.985377	1.20426		0.96185	1.38211
0.982644	1.04029		0.881955	1.31631
0.915871	1.00058		0.857739	1.29415
0.872194	0.977459		0.847534	1.18625
0.860174	0.977016		0.751062	1.13599
0.826977	0.969312		0.718754	1.05907
0.814105	0.94781		0.698227	1.05323
0.80972	0.904456		0.69254	0.903877
0.806815	0.890616		0.686269	0.841791
0.799431	0.870222		0.668074	0.818303
0.772255	0.86297		0.620158	0.802642
0.771258	0.845531		0.555705	0.770229
0.760465	0.78248		0.553073	0.69329
0.736533	0.765462		0.524033	0.687742
0.728982	0.699331		0.51183	0.437647
0.724919	0.626878		0.503561
0.712528			0.470525
0.705623			0.459192
0.696143			0.43852
0.690228			0.366303
0.686316			1
1
