# Supplementary material for: Endophilin A1 facilitates organization of the GABAergic postsynaptic machinery to maintain excitation-inhibition balance
Source: eLife. 2025 Oct 2;13:RP102792. doi: 10.7554/eLife.102792 (PMC12490859; doi:10.7554/eLife.102792)
Supplement: Figure 5—source data 5. [file elife-102792-fig5-data5.xlsx]

## Sheet: Fig 5K Raw data
GFP + Vector				GFP + Vector
Source	mean intensity	mean intensity of per neuron		Source	number	length	number of per 10 μm	number of per neuron
MAX_2022.12.05-GFP-1-P-1.nd2:0001-0511-0503	427.887			MAX_2022.12.05-GFP-1-P-1.nd2	33	31.567	10.454
MAX_2022.12.05-GFP-1-S-1.nd2:0002-0512-0743	665.838	546.862		MAX_2022.12.05-GFP-1-S-1.nd2	47	31.26	15.0352	12.7446
MAX_2022.12.05-GFP-2-S-1.nd2:0001-0512-0750	503.215			MAX_2022.12.05-GFP-2-P-1.nd2	62	31.551	19.6507
MAX_2022.12.05-GFP-2-S1-1.nd2:0001-0348-0512	491.335			MAX_2022.12.05-GFP-2-S-1.nd2	69	67.368	10.2423
MAX_2022.12.05-GFP-2-T-1.nd2:0001-0490-0512	417.602	470.717		MAX_2022.12.05-GFP-2-S1-1.nd2	79	53.466	14.7757
MAX_2022.12.05-GFP-3-F-1.nd2:0001-0512-0521	784.088			MAX_2022.12.05-GFP-2-T-1.nd2	16	31.583	5.06602	12.4337
MAX_2022.12.05-GFP-3-P-1.nd2:0001-0467-0512	533.436			MAX_2022.12.05-GFP-3-F-1.nd2	41	31.862	12.868
MAX_2022.12.05-GFP-3-P1-1.nd2:0001-0512-0301	643.292			MAX_2022.12.05-GFP-3-P-1.nd2	79	31.429	25.136
MAX_2022.12.05-GFP-3-P2-1.nd2:0001-0517-0416	576.748			MAX_2022.12.05-GFP-3-P1-1.nd2	57	50.787	11.2233
MAX_2022.12.05-GFP-3-S-1.nd2:0001-0512-0492	572.373			MAX_2022.12.05-GFP-3-P2-1.nd2	49	30.709	15.9562
MAX_2022.12.05-GFP-3-T-1.nd2:0001-0512-0514	647.512	626.241		MAX_2022.12.05-GFP-3-S-1.nd2	38	31.373	12.1123
MAX_2022.12.05-GFP-4-P-1.nd2:0001-0512-0464	751.613			MAX_2022.12.05-GFP-3-T-1.nd2	39	31.465	12.3947	14.9484
MAX_2022.12.05-GFP-4-S-1.nd2:0001-0437-0504	979.9			MAX_2022.12.05-GFP-4-P-1.nd2	59	31.467	18.7498
MAX_2022.12.05-GFP-4-S1-1.nd2:0001-0512-0540	768.226			MAX_2022.12.05-GFP-4-S-1.nd2	74
MAX_2022.12.05-GFP-4-T-1.nd2:0001-0242-0512	711.658	802.849		MAX_2022.12.05-GFP-4-S1-1.nd2	31	31.521	9.83471	13.6928
MAX_2022.12.05-GFP-5-P-1.nd2:0001-0512-0509	440.796	440.796		MAX_2022.12.05-GFP-4-T-1.nd2	41	32.816	12.4939
MAX_2022.12.05-GFP-6-P-1-1.nd2:0001-0683-0512	563.128			MAX_2022.12.05-GFP-5-P-1.nd2	41	31.852	12.872
MAX_2022.12.05-GFP-6-S-1.nd2:0001-0363-0512	487.105	525.116		MAX_2022.12.05-GFP-6-P-1-1.nd2	34	31.557	10.7742
MAX_2022.12.05-GFP-7-P-1.nd2:0001-0514-0512	635.835	635.835		MAX_2022.12.05-GFP-6-S-1.nd2	29	37.381	7.75795	10.9986
MAX_2022.12.05-GFP-8-F-1.nd2:0001-0512-0433	527.356			MAX_2022.12.05-GFP-7-P-1.nd2	40	31.771	12.5901
MAX_2022.12.05-GFP-8-P-1.nd2:0001-0512-0472	511.343			MAX_2022.12.05-GFP-8-F-1.nd2	20	32.364	6.17971
MAX_2022.12.05-GFP-8-P1-1.nd2:0001-0512-0701	465.817			MAX_2022.12.05-GFP-8-P-1.nd2	42	32.325	12.993
MAX_2022.12.05-GFP-8-S-1.nd2:0001-0482-0526	402.804			MAX_2022.12.05-GFP-8-P1-1.nd2	48	49.225	9.75114
MAX_2022.12.05-GFP-8-T-1.nd2:0001-0512-0514	418.568	465.178		MAX_2022.12.05-GFP-8-S-1.nd2	13	32.539	3.99521
MAX_2022.12.05-GFP-9-F-1.nd2:0001-0527-0512	642.245	642.245		MAX_2022.12.05-GFP-8-T-1.nd2	16	32.747	4.88594	7.56101
				MAX_2022.12.05-GFP-9-F-1.nd2	35	31.405	11.1447	11.1447
GFP-2A-Cre + Vector				GFP-2A-Cre + Vector
Source	mean intensity	mean intensity of per neuron		Source	number	length	number of per 10 μm	number of per neuron
MAX_2022.12.05-CRE-V-1-P-1-1.nd2:0001-0512-0546	390.659			MAX_2022.12.05-CRE-V-1-P-1-1.nd2	45	31.467	14.3007
MAX_2022.12.05-CRE-V-1-S-1.nd2:0001-0511-0449	370.084			MAX_2022.12.05-CRE-V-1-S-1.nd2	15	32.082	4.67552
MAX_2022.12.05-CRE-V-1-T-1-1.nd2:0001-0450-0512	397.452	386.065		MAX_2022.12.05-CRE-V-1-T-1-1.nd2	19	32.026	5.93268	8.30296
MAX_2022.12.05-CRE-V-2-F-1.nd2:0001-0512-0568	269.054			MAX_2022.12.05-CRE-V-2-F-1.nd2	26	35.562	7.31117
MAX_2022.12.05-CRE-V-2-P-1.nd2:0001-0512-0512	396.999			MAX_2022.12.05-CRE-V-2-P-1.nd2	32	31.626	10.1183
MAX_2022.12.05-CRE-V-2-P1-1.nd2:0001-0512-0453	468.154			MAX_2022.12.05-CRE-V-2-P1-1.nd2	51	33.009	15.4503
MAX_2022.12.05-CRE-V-2-S-1.nd2:0001-0514-0512	422.831			MAX_2022.12.05-CRE-V-2-S-1.nd2	27	32.028	8.43012
MAX_2022.12.05-CRE-V-2-S1-1.nd2:0001-0511-0670	540.234	419.454		MAX_2022.12.05-CRE-V-2-S1-1.nd2	23	32.652	7.04398	9.67077
MAX_2022.12.05-CRE-V-3-P-1.nd2:0001-0512-0499	442.419			MAX_2022.12.05-CRE-V-3-P-1.nd2	27	32.277	8.36509
MAX_2022.12.05-CRE-V-3-S-1.nd2:0001-0462-0512	521.71			MAX_2022.12.05-CRE-V-3-S-1.nd2	45	31.444	14.3112
MAX_2022.12.05-CRE-V-3-T-1.nd2:0001-0521-0512	362.125			MAX_2022.12.05-CRE-V-3-T-1.nd2	33	31.688	10.414
MAX_2022.12.05-CRE-V-3-T1-1.nd2:0001-0512-0477	356.474	420.682		MAX_2022.12.05-CRE-V-3-T1-1.nd2	16	33.366	4.7953	9.4714
MAX_2022.12.05-CRE-V-4-P-1.nd2:0001-0512-0607	390.625			MAX_2022.12.05-CRE-V-4-P-1.nd2	38	32.161	11.8156
MAX_2022.12.05-CRE-V-4-S-1.nd2:0001-0510-0207	431.904			MAX_2022.12.05-CRE-V-4-S-1.nd2	28	61.47	4.55507
MAX_2022.12.05-CRE-V-4-T-1.nd2:0001-0512-0192	465.977	429.502		MAX_2022.12.05-CRE-V-4-T-1.nd2	29	33.029	8.78016	8.38359
MAX_2022.12.05-CRE-V-6-1-1.nd2:0001-0512-0514	411.566			MAX_2022.12.05-CRE-V-6-1-1.nd2	15	32.242	4.65232
MAX_2022.12.05-CRE-V-6-P-1.nd2:0002-0512-0538	559.981			MAX_2022.12.05-CRE-V-6-P-1.nd2	43	31.71	13.5604
MAX_2022.12.05-CRE-V-6-S-1.nd2:0001-0239-0512	366.369	445.972		MAX_2022.12.05-CRE-V-6-S-1.nd2	10	31.196	3.20554	7.13942
MAX_2022.12.05-CRE-V-7-P-1.nd2:0001-0494-0512	396.449			MAX_2022.12.05-CRE-V-7-P-1.nd2	21	31.531	6.66011
MAX_2022.12.05-CRE-V-7-S-1.nd2:0001-0463-0512	464.275			MAX_2022.12.05-CRE-V-7-S-1.nd2	12	32.188	3.7281
MAX_2022.12.05-CRE-V-7-S1-1.nd2:0001-0487-0706	383.267			MAX_2022.12.05-CRE-V-7-S1-1.nd2	10	38.561	2.59329
MAX_2022.12.05-CRE-V-7-T-1.nd2:0001-0344-0512	516.099	440.022		MAX_2022.12.05-CRE-V-7-T-1.nd2	15	31.525	4.75813	4.43491
MAX_2022.12.05-CRE-V-8-P-1.nd2:0001-0476-0512	342.764	342.764		MAX_2022.12.05-CRE-V-8-P-1.nd2	35	30.992	11.2932	11.2932
GFP-2A-Cre + EndoA1				GFP-2A-Cre + EndoA1
Source	mean intensity	mean intensity of per neuron		Source	number	length	number of per 10 μm	number of per neuron
MAX_2022.12.05-CRE-A1-1-p-1.nd2:0001-0485-0512	469			MAX_2022.12.05-CRE-A1-1-p-1.nd2	53	31.428	16.8639
MAX_2022.12.05-CRE-A1-1-S-1.nd2:0001-0613-0513	485.274			MAX_2022.12.05-CRE-A1-1-S-1.nd2	51	63.76	7.99875
MAX_2022.12.05-CRE-A1-1-T-1.nd2:0001-0542-0512	532.844	495.706		MAX_2022.12.05-CRE-A1-1-T-1.nd2	49	31.57	15.5211	13.4613
MAX_2022.12.05-CRE-A1-2-P-1.nd2:0001-0512-0549	480.593			MAX_2022.12.05-CRE-A1-2-P-1.nd2	45	51.889	8.67236
MAX_2022.12.05-CRE-A1-2-S-1.nd2:0001-0512-0447	582.307	531.45		MAX_2022.12.05-CRE-A1-2-S-1.nd2	37	57.063	6.48406	7.57821
MAX_2022.12.05-CRE-A1-3.P-1.nd2:0001-0512-0449	479.617			MAX_2022.12.05-CRE-A1-3.P-1.nd2	32	32.211	9.93449
MAX_2022.12.05-CRE-A1-3.S-1.nd2:0001-0465-0512	383.295	431.456		MAX_2022.12.05-CRE-A1-3.S-1.nd2	32	32.432	9.8668	9.90065
MAX_2022.12.05-CRE-A1-4.P-1.nd2:0001-0512-0505	363.384			MAX_2022.12.05-CRE-A1-4.P-1.nd2	40	31.615	12.6522
MAX_2022.12.05-CRE-A1-4.P1-1.nd2:0001-0512-0468	453.37	408.377		MAX_2022.12.05-CRE-A1-4.P1-1.nd2	45	31.343	14.3573	13.5047
MAX_2022.12.05-CRE-A1-5.P-1.nd2:0001-0405-0512	542.613			MAX_2022.12.05-CRE-A1-5.P-1.nd2	36	32.2	11.1801
MAX_2022.12.05-CRE-A1-5.S-1.nd2:0001-0512-0274	499.465			MAX_2022.12.05-CRE-A1-5.S-1.nd2	34	32.452	10.477
MAX_2022.12.05-CRE-A1-5TS-1.nd2:0001-0463-0512	428.592	490.223		MAX_2022.12.05-CRE-A1-5TS-1.nd2	29	33.472	8.66396	10.107
MAX_2022.12.05-CRE-A1-6.P1-1.nd2:0001-0488-0515	549.256			MAX_2022.12.05-CRE-A1-6.P1-1.nd2	42	31.738	13.2333
MAX_2022.12.05-CRE-A1-6.P2-1.nd2:0001-0512-0632	463.69			MAX_2022.12.05-CRE-A1-6.P2-1.nd2	26	31.57	8.23567
MAX_2022.12.05-CRE-A1-6.S-1.nd2:0001-0512-0598	654.075			MAX_2022.12.05-CRE-A1-6.S-1.nd2	33	31.209	10.5739
MAX_2022.12.05-CRE-A1-6.T-1.nd2:0001-0512-0485	493.576	555.674		MAX_2022.12.05-CRE-A1-6.T-1.nd2	30	31.504	9.5226	10.3914
MAX_2022.12.05-CRE-A1-7.P-1.nd2:0001-0512-0488	435.241	435.241		MAX_2022.12.05-CRE-A1-7.P-1.nd2	33	64.741	5.09723	5.09723
MAX_2022.12.05-CRE-A1-9.P1-1.nd2:0001-0512-0434	444.266			MAX_2022.12.05-CRE-A1-9.P1-1.nd2	54	81.276	6.64403
MAX_2022.12.05-CRE-A1-9.S-1.nd2:0001-0512-0777	506.848			MAX_2022.12.05-CRE-A1-9.S-1.nd2	21	32.501	6.46134
MAX_2022.12.05-CRE-A1-9.T-1.nd2:0001-0512-0685	487.207	479.44		MAX_2022.12.05-CRE-A1-9.T-1.nd2	19	31.648	6.00354	6.36964
MAX_2022.12.05-CRE-A1-10.P-1.nd2:0001-0528-0503	751.986			MAX_2022.12.05-CRE-A1-10.P-1.nd2	22	31.532	6.97704
MAX_2022.12.05-CRE-A1-10.S-1.nd2:0001-0467-0512	644.421			MAX_2022.12.05-CRE-A1-10.S-1.nd2	29	31.755	9.13242
MAX_2022.12.05-CRE-A1-10.T-1.nd2:0001-0356-0512	618.598	671.668		MAX_2022.12.05-CRE-A1-10.T-1.nd2	25	34.914	7.16045	7.75664
MAX_2022.12.05-CRE-A1-11.P-1.nd2:0001-0433-0512	645.083			MAX_2022.12.05-CRE-A1-11.P-1.nd2	51	31.825	16.0251
MAX_2022.12.05-CRE-A1-11.S-1.nd2:0001-0275-0512	652.759			MAX_2022.12.05-CRE-A1-11.S-1.nd2	54	33.107	16.3107
MAX_2022.12.05-CRE-A1-11.T-1.nd2:0001-0469-0512	509.156	602.333		MAX_2022.12.05-CRE-A1-11.T-1.nd2	19	31.792	5.97635	12.7707
GFP-2A-Cre + aa172-352				GFP-2A-Cre + aa172-352
MAX_2022.12.05-CRE-aa172-2-P-1.nd2:0001-0512-0486	538.023			MAX_2022.12.05-CRE-aa172-2-P-1.nd2:0001-0512-0486	11	31.085	3.53868
MAX_2022.12.05-CRE-aa172-5-P-1.nd2:0001-0554-0512	496.18			MAX_2022.12.05-CRE-aa172-5-P-1.nd2:0001-0554-0512	18	31.733	5.67233
MAX_2022.12.05-CRE-aa172-5-S-1.nd2:0001-0548-0512	461.429	498.544		MAX_2022.12.05-CRE-aa172-5-S-1.nd2:0001-0548-0512	10	33.306	3.00246	4.07116
MAX_2022.12.05-CRE-aa172-6-P-1.nd2:0001-0522-0512	524.882			MAX_2022.12.05-CRE-aa172-6-P-1.nd2:0001-0522-0512	12	31.089	3.85989
MAX_2022.12.05-CRE-aa172-6-S-1.nd2:0001-0455-0512	434.572	479.727		MAX_2022.12.05-CRE-aa172-6-S-1.nd2:0001-0455-0512	15	31.528	4.75768	4.30878
MAX_2022.12.05-CRE-aa172-7-S-1.nd2:0001-0452-0512	281.695			MAX_2022.12.05-CRE-aa172-7-S-1.nd2:0001-0452-0512	11	31.006	3.5477
MAX_2022.12.05-CRE-aa172-7-S-1.nd2:0001-0454-0512	457.252	369.474		MAX_2022.12.05-CRE-aa172-7-S-1.nd2:0001-0454-0512	8	30.24	2.6455	3.0966
MAX_2022.12.05-CRE-aa172-1-F-1.nd2:0001-0528-0512	437.391			MAX_2022.12.05-CRE-aa172-1-F-1.nd2:0001-0528-0512	23	31.379	7.32974
MAX_2022.12.05-CRE-aa172-1-P-1.nd2:0001-0437-0512	325.807			MAX_2022.12.05-CRE-aa172-1-P-1.nd2:0001-0437-0512	6	31.598	1.89885
MAX_2022.12.05-CRE-aa172-1-S-1.nd2:0001-0483-0512	284.381			MAX_2022.12.05-CRE-aa172-1-S-1.nd2:0001-0483-0512	8	35.97	2.22408
MAX_2022.12.05-CRE-aa172-1-T-1.nd2:0001-0538-0512	359.236	351.704		MAX_2022.12.05-CRE-aa172-1-T-1.nd2:0001-0538-0512	9	30.97	2.90604	3.58968
MAX_2022.12.05-CRE-aa172-4-F-1.nd2:0001-0390-0507	313.884			MAX_2022.12.05-CRE-aa172-4-F-1.nd2:0001-0390-0507	10	30.53	3.27547
MAX_2022.12.05-CRE-aa172-4-P-1.nd2:0001-0489-0512	256.649			MAX_2022.12.05-CRE-aa172-4-P-1.nd2:0001-0489-0512	6	31.317	1.91589
MAX_2022.12.05-CRE-aa172-4-P1-1.nd2:0001-0528-0506	219.146			MAX_2022.12.05-CRE-aa172-4-P1-1.nd2:0001-0528-0506	9	29.888	3.01124
MAX_2022.12.05-CRE-aa172-4-PS-1.nd2:0001-0435-0512	251.943			MAX_2022.12.05-CRE-aa172-4-PS-1.nd2:0001-0435-0512	12	30.221	3.97075
MAX_2022.12.05-CRE-aa172-4-T-1.nd2:0001-0549-0512	292.758	266.876		MAX_2022.12.05-CRE-aa172-4-T-1.nd2:0001-0549-0512	13	31.511	4.12554	3.25978
MAX_2022.12.05-CRE-aa172-8-F-1.nd2:0001-0493-0512	395.434			MAX_2022.12.05-CRE-aa172-8-F-1.nd2:0001-0493-0512	8	30.005	2.66622
MAX_2022.12.05-CRE-aa172-8-P-1.nd2:0001-0424-0512	410.612			MAX_2022.12.05-CRE-aa172-8-P-1.nd2:0001-0424-0512	9	29.841	3.01598
MAX_2022.12.05-CRE-aa172-8-P1-1.nd2:0001-0512-0580	363.647			MAX_2022.12.05-CRE-aa172-8-P1-1.nd2:0001-0512-0580	10	31.22	3.20307
MAX_2022.12.05-CRE-aa172-8-T-1.nd2:0001-0488-0512	320.576	372.567		MAX_2022.12.05-CRE-aa172-8-T-1.nd2:0001-0488-0512	8	30.512	2.62192	2.8768
MAX_2022.12.05-CRE-aa172-9-P-1.nd2:0001-0512-0507	242.387			MAX_2022.12.05-CRE-aa172-9-P-1.nd2:0001-0512-0507	15	39.569	3.79085
MAX_2022.12.05-CRE-aa172-9-P1-1.nd2:0001-0422-0512	297.964	270.175		MAX_2022.12.05-CRE-aa172-9-P1-1.nd2:0001-0422-0512	11	31.079	3.53937	3.66511
GFP-2A-Cre + △SH3				GFP-2A-Cre + △SH3
MAX_2022.12.05-CRE-DSH3-1-P-1.nd2:0001-0556-0512	415.287			MAX_2022.12.05-CRE-DSH3-1-P-1.nd2:0001-0556-0512	10	31.042	3.22144
MAX_2022.12.05-CRE-DSH3-1-P1-1.nd2:0001-0521-0512	498.146			MAX_2022.12.05-CRE-DSH3-1-P1-1.nd2:0001-0521-0512	12	31.48	3.81194
MAX_2022.12.05-CRE-DSH3-1-S-1.nd2:0001-0512-0634	566.718			MAX_2022.12.05-CRE-DSH3-1-S-1.nd2:0001-0512-0634	28	34.59	8.09483
2022.12.05-CRE-DSH3-1-T.nd2 - C=1:0468-0512:c:2/3 z:1/7 - 2022.12.05-CRE-DSH3-1-T.nd2 (series 1)	172.962	413.278		2022.12.05-CRE-DSH3-1-T.nd2 - C=1:0468-0512:c:2/3 z:1/7 - 2022.12.05-CRE-DSH3-1-T.nd2 (series 1)	3	31.46	0.953592	4.02045
2022.12.05-CRE-DSH3-2-P.nd2 - C=1:0413-0512:c:2/3 z:1/5 - 2022.12.05-CRE-DSH3-2-P.nd2 (series 1)	234.229			2022.12.05-CRE-DSH3-2-P.nd2 - C=1:0413-0512:c:2/3 z:1/5 - 2022.12.05-CRE-DSH3-2-P.nd2 (series 1)	8	34.123	2.34446
2022.12.05-CRE-DSH3-2-S.nd2 - C=1:0512-0364:c:2/3 z:1/5 - 2022.12.05-CRE-DSH3-2-S.nd2 (series 1)	177.895	206.062		2022.12.05-CRE-DSH3-2-S.nd2 - C=1:0512-0364:c:2/3 z:1/5 - 2022.12.05-CRE-DSH3-2-S.nd2 (series 1)	2	33.689	0.593666	1.46906
2022.12.05-CRE-DSH3-3-P.nd2 - C=1:0540-0512:c:2/3 z:1/6 - 2022.12.05-CRE-DSH3-3-P.nd2 (series 1)	311.595			2022.12.05-CRE-DSH3-3-P.nd2 - C=1:0540-0512:c:2/3 z:1/6 - 2022.12.05-CRE-DSH3-3-P.nd2 (series 1)	25	47.163	5.30077
2022.12.05-CRE-DSH3-3-P1.nd2 - C=1:0512-0415:c:2/3 z:1/8 - 2022.12.05-CRE-DSH3-3-P1.nd2 (series 1)	300.499			2022.12.05-CRE-DSH3-3-P1.nd2 - C=1:0512-0415:c:2/3 z:1/8 - 2022.12.05-CRE-DSH3-3-P1.nd2 (series 1)	27	34.385	7.85226
2022.12.05-CRE-DSH3-3-S.nd2 - C=1:0512-0725:c:2/3 z:1/5 - 2022.12.05-CRE-DSH3-3-S.nd2 (series 1)	502.726			2022.12.05-CRE-DSH3-3-S.nd2 - C=1:0512-0725:c:2/3 z:1/5 - 2022.12.05-CRE-DSH3-3-S.nd2 (series 1)	23	46.632	4.93224
2022.12.05-CRE-DSH3-3-S.nd2 - C=1:0512-0322:c:2/3 z:1/5 - 2022.12.05-CRE-DSH3-3-S.nd2 (series 1)	416.449			2022.12.05-CRE-DSH3-3-S.nd2 - C=1:0512-0322:c:2/3 z:1/5 - 2022.12.05-CRE-DSH3-3-S.nd2 (series 1)	13	34.726	3.74359
2022.12.05-CRE-DSH3-3-T.nd2 - C=1:0512-0656:c:2/3 z:1/6 - 2022.12.05-CRE-DSH3-3-T.nd2 (series 1)	347.795	375.813		2022.12.05-CRE-DSH3-3-T.nd2 - C=1:0512-0656:c:2/3 z:1/6 - 2022.12.05-CRE-DSH3-3-T.nd2 (series 1)	22	33.336	6.59947	5.68567
2022.12.05-CRE-DSH3-4-P.nd2 - C=1:0493-0512:c:2/3 z:1/5 - 2022.12.05-CRE-DSH3-4-P.nd2 (series 1)	244.545			2022.12.05-CRE-DSH3-4-P.nd2 - C=1:0493-0512:c:2/3 z:1/5 - 2022.12.05-CRE-DSH3-4-P.nd2 (series 1)	4	31.418	1.27316
2022.12.05-CRE-DSH3-4-P1.nd2 - C=1:0515-0512:c:2/3 z:1/6 - 2022.12.05-CRE-DSH3-4-P1.nd2 (series 1)	184.509			2022.12.05-CRE-DSH3-4-P1.nd2 - C=1:0515-0512:c:2/3 z:1/6 - 2022.12.05-CRE-DSH3-4-P1.nd2 (series 1)	4	40.079	0.998029
2022.12.05-CRE-DSH3-4-P2.nd2 - C=1:0476-0512:c:2/3 z:1/5 - 2022.12.05-CRE-DSH3-4-P2.nd2 (series 1)	168.424			2022.12.05-CRE-DSH3-4-P2.nd2 - C=1:0476-0512:c:2/3 z:1/5 - 2022.12.05-CRE-DSH3-4-P2.nd2 (series 1)	4	31.372	1.27502
2022.12.05-CRE-DSH3-4-T.nd2 - C=1:0702-0512:c:2/3 z:1/5 - 2022.12.05-CRE-DSH3-4-T.nd2 (series 1)	195.928	198.351		2022.12.05-CRE-DSH3-4-T.nd2 - C=1:0702-0512:c:2/3 z:1/5 - 2022.12.05-CRE-DSH3-4-T.nd2 (series 1)	12	39.853	3.01107	1.63932
2022.12.05-CRE-DSH3-5-P.nd2 - C=1:0512-0709:c:2/3 z:1/5 - 2022.12.05-CRE-DSH3-5-P.nd2 (series 1)	259.041			2022.12.05-CRE-DSH3-5-P.nd2 - C=1:0512-0709:c:2/3 z:1/5 - 2022.12.05-CRE-DSH3-5-P.nd2 (series 1)	21	43.892	4.78447
2022.12.05-CRE-DSH3-5-S.nd2 - C=1:0512-0733:c:2/3 z:1/5 - 2022.12.05-CRE-DSH3-5-S.nd2 (series 1)	374.08			2022.12.05-CRE-DSH3-5-S.nd2 - C=1:0512-0733:c:2/3 z:1/5 - 2022.12.05-CRE-DSH3-5-S.nd2 (series 1)	12
2022.12.05-CRE-DSH3-5-S1.nd2 - C=1:0435-0512:c:2/3 z:1/6 - 2022.12.05-CRE-DSH3-5-S1.nd2 (series 1)	295.21	309.444		2022.12.05-CRE-DSH3-5-S1.nd2 - C=1:0435-0512:c:2/3 z:1/6 - 2022.12.05-CRE-DSH3-5-S1.nd2 (series 1)	8	31.345	2.55224	3.66836
2022.12.05-CRE-DSH3-6-P.nd2 - C=1:0512-0640:c:2/3 z:1/5 - 2022.12.05-CRE-DSH3-6-P.nd2 (series 1)	273.791	273.791		2022.12.05-CRE-DSH3-6-P.nd2 - C=1:0512-0640:c:2/3 z:1/5 - 2022.12.05-CRE-DSH3-6-P.nd2 (series 1)	5	31.21	1.60205
MAX_2022.12.05-CRE-DSH3-6-P1-1.nd2:0001-0546-0512	435.931			MAX_2022.12.05-CRE-DSH3-6-P1-1.nd2:0001-0546-0512	16	33.893	4.72074
MAX_2022.12.05-CRE-DSH3-6-S-1.nd2:0001-0512-0624	479.838	435.931		MAX_2022.12.05-CRE-DSH3-6-S-1.nd2:0001-0512-0624	20	31.951	6.25958	4.19412
MAX_2022.12.05-CRE-DSH3-7-P-1.nd2:0001-0512-0664	334.55			MAX_2022.12.05-CRE-DSH3-7-P-1.nd2:0001-0512-0664	32	31.72	10.0883
MAX_2022.12.05-CRE-DSH3-7-S-1.nd2:0001-0412-0512	215.673	275.111		MAX_2022.12.05-CRE-DSH3-7-S-1.nd2:0001-0412-0512	13	42.562	3.05437	6.57132
MAX_2022.12.05-CRE-DSH3-8-P-1.nd2:0001-0512-0571	662.814			MAX_2022.12.05-CRE-DSH3-8-P-1.nd2:0001-0512-0571	54	31.817	16.9721
MAX_2022.12.05-CRE-DSH3-8-S-1.nd2:0001-0512-0715	494.196	578.505		MAX_2022.12.05-CRE-DSH3-8-S-1.nd2:0001-0512-0715	24	48.9	4.90798	10.94
GFP + Vector				GFP + Vector
Source	mean intensity			Source	number	length	number of per 10 μm	number of per neuron
MAX_2023.03.07-GFP-1-P-1.nd2:0002-0512-0525	247.864	mean intensity of per neuron		MAX_2023.03.07-GFP-1-P-1.nd2	11	31.296	3.51483
MAX_2023.03.07-GFP-1-P1-1.nd2:0002-0512-0417	322.286			MAX_2023.03.07-GFP-1-P1-1.nd2	36	32.343	11.1307
MAX_2023.03.07-GFP-1-S-1.nd2:0002-0512-0484	303.568	291.239		MAX_2023.03.07-GFP-1-S-1.nd2	12	32.959	3.64089	6.09547
MAX_2023.03.07-GFP-2-F-1.nd2:0002-0512-0560	465.305			MAX_2023.03.07-GFP-2-F-1.nd2	12	31.967	3.75387
MAX_2023.03.07-GFP-2-F1-1.nd2:0002-0512-0432	420.337			MAX_2023.03.07-GFP-2-F1-1.nd2	13	31.565	4.11849
MAX_2023.03.07-GFP-2-P-1.nd2:0002-0512-0644	395.373			MAX_2023.03.07-GFP-2-P-1.nd2	40	57.385	6.97046
MAX_2023.03.07-GFP-2-S-1.nd2:0002-0512-0485	403.004			MAX_2023.03.07-GFP-2-S-1.nd2	11	31.69	3.47113
MAX_2023.03.07-GFP-2-T-1.nd2:0002-0512-0514	528.496	419.82		MAX_2023.03.07-GFP-2-T-1.nd2	9	31.627	2.84567	4.23192
MAX_2023.03.07-GFP-3-P-1.nd2:0002-0512-0509	306.405			MAX_2023.03.07-GFP-3-P-1.nd2	12	31.656	3.79075
MAX_2023.03.07-GFP-3-S-1.nd2:0002-0512-0506	355.211			MAX_2023.03.07-GFP-3-S-1.nd2	6	31.407	1.9104
MAX_2023.03.07-GFP-3-T-1.nd2:0002-0512-0527	402.206	354.607		MAX_2023.03.07-GFP-3-T-1.nd2	15	30.784	4.87266	3.5246
MAX_2023.03.07-GFP-4-P-1.nd2:0002-0512-0482	434.435			MAX_2023.03.07-GFP-4-P-1.nd2	14	31.8	4.40252
MAX_2023.03.07-GFP-4-S-1.nd2:0002-0512-0416	376.167			MAX_2023.03.07-GFP-4-S-1.nd2	14	31.181	4.48991
MAX_2023.03.07-GFP-4-T-1.nd2:0002-0530-0512	388.903	399.835		MAX_2023.03.07-GFP-4-T-1.nd2	8	30.988	2.58164	3.82469
MAX_2023.03.07-GFP-5-F-1.nd2:0002-0502-0512	545.042			MAX_2023.03.07-GFP-5-F-1.nd2	17	31.331	5.42594
MAX_2023.03.07-GFP-5-P-1.nd2:0002-0530-0512	388.869			MAX_2023.03.07-GFP-5-P-1.nd2	15	31.476	4.76554
MAX_2023.03.07-GFP-5-S-1.nd2:0002-0512-0598	612.615			MAX_2023.03.07-GFP-5-S-1.nd2	16	31.172	5.13281
MAX_2023.03.07-GFP-5-T-1.nd2:0002-0512-0408	601.049	536.894		MAX_2023.03.07-GFP-5-T-1.nd2	26	67.612	3.84547	4.79244
MAX_2023.03.07-GFP-6-F-1.nd2:0002-0512-0531	276.291			MAX_2023.03.07-GFP-6-F-1.nd2	12	31.613	3.79591
MAX_2023.03.07-GFP-6-P-1.nd2:0002-0464-0512	482.284			MAX_2023.03.07-GFP-6-P-1.nd2	35	31.083	11.2602
MAX_2023.03.07-GFP-6-S-1.nd2:0002-0350-0512	378.68			MAX_2023.03.07-GFP-6-S-1.nd2	18	35.984	5.00222
MAX_2023.03.07-GFP-6-T-1.nd2:0002-0669-0448	410.476	386.933		MAX_2023.03.07-GFP-6-T-1.nd2	14	37.608	3.72261	5.94523
MAX_2023.03.07-GFP-7-F1-1.nd2:0002-0512-0502	486.146			MAX_2023.03.07-GFP-7-F1-1.nd2	9	47.254	1.9046
MAX_2023.03.07-GFP-7-P-1.nd2:0002-0512-0622	456.303			MAX_2023.03.07-GFP-7-P-1.nd2	26	33.425	7.77861
MAX_2023.03.07-GFP-7-S-1.nd2:0002-0514-0359	262.63			MAX_2023.03.07-GFP-7-S-1.nd2	7	28.276	2.4756
MAX_2023.03.07-GFP-7-S1-1.nd2:0002-0537-0512	522.538			MAX_2023.03.07-GFP-7-S1-1.nd2	30	31.608	9.49127
MAX_2023.03.07-GFP-7-T-1.nd2:0002-0457-0512	618.866			MAX_2023.03.07-GFP-7-T-1.nd2	17	31.326	5.4268
MAX_2023.03.07-GFP-7-T1-1.nd2:0002-0512-0562	611.286	492.962		MAX_2023.03.07-GFP-7-T1-1.nd2	22	31.827	6.91237	5.66487
MAX_2023.03.07-GFP-8-P-1.nd2:0002-0512-0493	404.529			MAX_2023.03.07-GFP-8-P-1.nd2	19	32.119	5.9155
MAX_2023.03.07-GFP-8-S-1.nd2:0002-0473-0512	480.784			MAX_2023.03.07-GFP-8-S-1.nd2	6	31.205	1.92277
MAX_2023.03.07-GFP-8-T-1.nd2:0002-0493-0512	437.992	441.102		MAX_2023.03.07-GFP-8-T-1.nd2	14	32.258	4.34001	4.05943
MAX_2023.03.07-GFP-9-P-1.nd2:0002-0512-0666	476.399			MAX_2023.03.07-GFP-9-P-1.nd2	24	31.664	7.57959
MAX_2023.03.07-GFP-9-P1-1.nd2:0002-0512-0501	433.515			MAX_2023.03.07-GFP-9-P1-1.nd2	28	33.048	8.47252
MAX_2023.03.07-GFP-9-P2-1.nd2:0002-0512-0424	452.292			MAX_2023.03.07-GFP-9-P2-1.nd2	24	41.82	5.73888
MAX_2023.03.07-GFP-9-S-1.nd2:0002-0512-0543	506.036	467.06		MAX_2023.03.07-GFP-9-S-1.nd2	17	31.698	5.36311	6.78853
MAX_2023.03.07-GFP-10-F-1.nd2:0002-0512-0423	427.054			MAX_2023.03.07-GFP-10-F-1.nd2	12	31.26	3.83877
MAX_2023.03.07-GFP-10-P-1.nd2:0002-0512-0418	356.709			MAX_2023.03.07-GFP-10-P-1.nd2	9	31.289	2.87641
MAX_2023.03.07-GFP-10-S-1.nd2:0002-0512-0654	352.393			MAX_2023.03.07-GFP-10-S-1.nd2	22	30.952	7.10778
MAX_2023.03.07-GFP-10-T-1.nd2:0002-0460-0512	390.357	381.628		MAX_2023.03.07-GFP-10-T-1.nd2	12	33.248	3.60924	4.35805
MAX_2023.03.07-GFP-11-P-1.nd2:0002-0547-0504	397.978			MAX_2023.03.07-GFP-11-P-1.nd2	15	31.916	4.69984
MAX_2023.03.07-GFP-11-S-1.nd2:0002-0512-0511	484.936	441.457		MAX_2023.03.07-GFP-11-S-1.nd2	17	32.235	5.27377	4.9868
MAX_2023.03.07-GFP-12-P-1.nd2:0002-0787-0512	538.75			MAX_2023.03.07-GFP-12-P-1.nd2	25	31.734	7.87799
MAX_2023.03.07-GFP-12-P1-1.nd2:0002-0494-0512	489.706			MAX_2023.03.07-GFP-12-P1-1.nd2	37	31.557	11.7248
MAX_2023.03.07-GFP-12-S-1.nd2:0002-0512-0582	441.663			MAX_2023.03.07-GFP-12-S-1.nd2	25	46.721	5.35091
MAX_2023.03.07-GFP-12-T-1.nd2:0002-0431-0607	341.531	452.913		MAX_2023.03.07-GFP-12-T-1.nd2	10	25.062	3.9901	7.23595
MAX_2023.03.07-GFP-13-F-1.nd2:0002-0512-0679	447.482			MAX_2023.03.07-GFP-13-F-1.nd2	11	31.278	3.51685
MAX_2023.03.07-GFP-13-P-1.nd2:0002-0512-0752	419.081			MAX_2023.03.07-GFP-13-P-1.nd2	23	37.525	6.12925
MAX_2023.03.07-GFP-13-S-1.nd2:0002-0512-0628	385.467			MAX_2023.03.07-GFP-13-S-1.nd2	10	32.323	3.09377
MAX_2023.03.07-GFP-13-T-1.nd2:0004-0436-0512	458.972	427.75		MAX_2023.03.07-GFP-13-T-1.nd2	17	31.091	5.46782	4.55192
MAX_2023.03.07-GFP-14-F-1.nd2:0002-0512-0571	335.901			MAX_2023.03.07-GFP-14-F-1.nd2	8	31.608	2.531
MAX_2023.03.07-GFP-14-P-1.nd2:0002-0430-0512	360.388			MAX_2023.03.07-GFP-14-P-1.nd2	27	31.287	8.62978
MAX_2023.03.07-GFP-14-S-1.nd2:0002-0444-0512	424.821	373.703		MAX_2023.03.07-GFP-14-S-1.nd2	17	31.594	5.38077	5.51385
GFP-2A-Cre + Vector				GFP-2A-Cre + Vector
Source	mean intensity	mean intensity of per neuron		Source	number	length	number of per 10 μm	number of per neuron
MAX_2023.03.07-cre-v-1-P-1.nd2:0002-0470-0512	305.618			MAX_2023.03.07-cre-v-1-P-1.nd2	7
MAX_2023.03.07-cre-v-1-P1-1.nd2:0002-0509-0547	368.82			MAX_2023.03.07-cre-v-1-P1-1.nd2	14	32.996	4.24294
MAX_2023.03.07-cre-v-1-S-1.nd2:0002-0488-0510	362.017	345.485		MAX_2023.03.07-cre-v-1-S-1.nd2	12	31.489	3.81085	4.0269
MAX_2023.03.07-cre-v-2-P-1.nd2:0002-0463-0512	311.884			MAX_2023.03.07-cre-v-2-P-1.nd2	4	32.556	1.22865
MAX_2023.03.07-cre-v-2-S-1.nd2:0002-0485-0512	263.044			MAX_2023.03.07-cre-v-2-S-1-1.nd2	4	31.39	1.27429
MAX_2023.03.07-cre-v-2-S1-1.nd2:0002-0502-0512	356.668	310.532		MAX_2023.03.07-cre-v-2-S1-1.nd2	15	32.018	4.68486	2.39594
MAX_2023.03.07-cre-v-3-F-1.nd2:0002-0520-0441	309.106			MAX_2023.03.07-cre-v-3-F-1.nd2	3	25.387	1.18171
MAX_2023.03.07-cre-v-3-P-1.nd2:0002-0512-0556	404.833			MAX_2023.03.07-cre-v-3-P-1.nd2	17	31.104	5.46553
MAX_2023.03.07-cre-v-3-P1-1.nd2:0002-0512-0504	528.761			MAX_2023.03.07-cre-v-3-P1-1.nd2	31	31.495	9.84283
MAX_2023.03.07-cre-v-3-P2-1.nd2:0002-0663-0512	419.894			MAX_2023.03.07-cre-v-3-T-1.nd2	19	60.992	3.11516	4.90131
MAX_2023.03.07-cre-v-3-T-1.nd2:0002-0512-0551	395.141	411.547		MAX_2023.03.07-cre-v-4-P-1.nd2	21	31.075	6.75784
MAX_2023.03.07-cre-v-4-P-1.nd2:0002-0512-0518	420.465			MAX_2023.03.07-cre-v-4-S-1.nd2	14	33.368	4.19564
MAX_2023.03.07-cre-v-4-S-1.nd2:0002-0512-0354	406.253			MAX_2023.03.07-cre-v-4-T-1.nd2	7	32.841	2.13148	4.36165
MAX_2023.03.07-cre-v-4-T-1.nd2:0002-0316-0512	258.44	361.719		MAX_2023.03.07-cre-v-5-P-1.nd2	16	31.654	5.05465
MAX_2023.03.07-cre-v-5-P-1.nd2:0002-0512-0489	337.433			MAX_2023.03.07-cre-v-5-S-1.nd2	17	32.556	5.22177
MAX_2023.03.07-cre-v-5-S-1.nd2:0002-0481-0511	368.672			MAX_2023.03.07-cre-v-5-T-1.nd2	11	32.894	3.34407	4.54017
MAX_2023.03.07-cre-v-5-T-1.nd2:0002-0410-0512	317.771	341.292		MAX_2023.03.07-cre-v-6-P-1.nd2	39	31.524	12.3715
MAX_2023.03.07-cre-v-6-P-1.nd2:0002-0512-0564	520.477			MAX_2023.03.07-cre-v-6-S-1.nd2	17	52.667	3.22783
MAX_2023.03.07-cre-v-6-S-1.nd2:0002-0512-0561	497.107			MAX_2023.03.07-cre-v-6-T-1.nd2	10	33.813	2.95744	6.1856
MAX_2023.03.07-cre-v-6-T-1.nd2:0002-0428-0512	378.893	465.492		MAX_2023.03.07-cre-v-7-P-1.nd2	24	53.299	4.5029
MAX_2023.03.07-cre-v-7-P-1.nd2:0002-0512-0362	441.933			MAX_2023.03.07-cre-v-7-S-1.nd2	8	32.159	2.48764	6.99054
MAX_2023.03.07-cre-v-7-S-1.nd2:0002-0512-0603	318.901	380.417		MAX_2023.03.07-cre-v-8-P-1.nd2	9	33.251	2.70669
MAX_2023.03.07-cre-v-8-P-1.nd2:0002-0524-0512	343.724			MAX_2023.03.07-cre-v-8-S-1.nd2	14	31.004	4.51555
MAX_2023.03.07-cre-v-8-S-1.nd2:0002-0478-0512	439.53			MAX_2023.03.07-cre-v-8-T-1.nd2	19	30.903	6.14827	4.45683
MAX_2023.03.07-cre-v-8-T-1.nd2:0002-0512-0631	400.769	394.674		MAX_2023.03.07-cre-v-9-F-1.nd2	9	32.014	2.81127
MAX_2023.03.07-cre-v-9-F-1.nd2:0002-0436-0512	515.917			MAX_2023.03.07-cre-v-9-P-1.nd2	7	31.355	2.2325
MAX_2023.03.07-cre-v-9-P-1.nd2:0002-0211-0512	381.688			MAX_2023.03.07-cre-v-9-P1-1.nd2	21	31.978	6.56701
MAX_2023.03.07-cre-v-9-P1-1.nd2:0002-0512-0563	475.695			MAX_2023.03.07-cre-v-9-S-1.nd2	8	31.436	2.54485
MAX_2023.03.07-cre-v-9-S-1.nd2:0002-0344-0512	388.885			MAX_2023.03.07-cre-v-9-T-1.nd2	10	32.757	3.05278	3.44168
MAX_2023.03.07-cre-v-9-T-1.nd2:0002-0405-0512	429.853	438.408		MAX_2023.03.07-cre-v-10-A`-1.nd2	13	32.068	4.05389
MAX_2023.03.07-cre-v-10-A`-1.nd2:0002-0680-0512	440.598			MAX_2023.03.07-cre-v-10-P-1.nd2	12	31.967	3.75387
MAX_2023.03.07-cre-v-10-P-1.nd2:0002-0512-0576	365.119			MAX_2023.03.07-cre-v-10-S-1.nd2	7	33.44	2.0933
MAX_2023.03.07-cre-v-10-S-1.nd2:0002-0442-0512	356.313			MAX_2023.03.07-cre-v-10-T1-2-1.nd2	16	32.096	4.98504	3.72153
MAX_2023.03.07-cre-v-10-T1-2-1.nd2:0001-0512-0684	394.437	389.117		MAX_2023.03.07-cre-v-11-F-1.nd2	10	32.992	3.03104
MAX_2023.03.07-cre-v-11-F-1.nd2:0002-0521-0512	326.327			MAX_2023.03.07-cre-v-11-P-1.nd2	9	32.078	2.80566
MAX_2023.03.07-cre-v-11-P-1.nd2:0002-0536-0512	332.519			MAX_2023.03.07-cre-v-11-S-1.nd2	12	56.548	2.12209
MAX_2023.03.07-cre-v-11-S-1.nd2:0002-0512-0705	331.101			MAX_2023.03.07-cre-v-11-T-1.nd2	11	31.733	3.46642	2.8563
MAX_2023.03.07-cre-v-11-T-1.nd2:0002-0512-0701	329.87	329.954
GFP-2A-Cre + EndoA1				GFP-2A-Cre + EndoA1
Source	mean intensity	mean intensity of per neuron		Source	number	length	number of per 10 μm	number of per neuron
MAX_2023.03.07-A1-1-P-1.nd2:0002-0429-0512	373.543			MAX_2023.03.07-A1-1-P-1.nd2			11.7911
MAX_2023.03.07-A1-1-S-1.nd2:0002-0617-0512	401.269			MAX_2023.03.07-A1-1-S-1.nd2	23	31.772	7.23908
MAX_2023.03.07-A1-1-T-1.nd2:0002-0512-0640	372.316	382.376		MAX_2023.03.07-A1-1-T-1.nd2	24	31.243	7.68172	8.90398
MAX_2023.03.07-A1-2-F-1.nd2:0002-0480-0512	326.937			MAX_2023.03.07-A1-2-F-1.nd2	19	31.894	5.95723
MAX_2023.03.07-A1-2-P-1.nd2:0001-0692-0512	538.609			MAX_2023.03.07-A1-2-P-1.nd2	27	31.548	8.55839
MAX_2023.03.07-A1-2-P1-1.nd2:0002-0512-0525	406.126			MAX_2023.03.07-A1-2-P1-1.nd2	30	55.305	5.42446
MAX_2023.03.07-A1-2-S-1.nd2:0002-0512-0689	441.674	428.337		MAX_2023.03.07-A1-2-S-1.nd2	25	31.368	7.96991	6.9775
MAX_2023.03.07-A1-3-F-1.nd2:0002-0512-0733	556.251			MAX_2023.03.07-A1-3-F-1.nd2	21	31.272	6.71527
MAX_2023.03.07-A1-3-P-1.nd2:0002-0620-0512	631.907			MAX_2023.03.07-A1-3-P-1.nd2	25	32.356	7.72654
MAX_2023.03.07-A1-3-S-1.nd2:0002-0454-0512	585.029			MAX_2023.03.07-A1-3-S-1.nd2	14	32.62	4.29185
MAX_2023.03.07-A1-3-S1-1.nd2:0002-0512-0599	522.128			MAX_2023.03.07-A1-3-S1-1.nd2	11	30.734	3.5791
MAX_2023.03.07-A1-3-T-1.nd2:0002-0512-0735	491.623	557.388		MAX_2023.03.07-A1-3-T-1.nd2	10	31.713	3.15328	5.09321
MAX_2023.03.07-A1-4-P-1.nd2:0002-0499-0512	752.799			MAX_2023.03.07-A1-4-P-1.nd2	25	31.87	7.84437
MAX_2023.03.07-A1-4-S-1.nd2:0002-0483-0512	695.233			MAX_2023.03.07-A1-4-S-1.nd2	16	31.431	5.09052
MAX_2023.03.07-A1-4-T-1.nd2:0002-0512-0492	657.361	701.798		MAX_2023.03.07-A1-4-T-1.nd2	22	31.327	7.0227	6.65253
MAX_2023.03.07-A1-5-P-1.nd2:0002-0363-0512	401.474			MAX_2023.03.07-A1-5-P-1.nd2	27	32.913	8.20345
MAX_2023.03.07-A1-6-P-1.nd2:0002-0504-0512	417.059			MAX_2023.03.07-A1-6-P-1.nd2	11	31.157	3.53051
MAX_2023.03.07-A1-6-S-1.nd2:0002-0572-0512	414.097			MAX_2023.03.07-A1-6-S-1.nd2	21	31.99	6.56455
MAX_2023.03.07-A1-6-T-1.nd2:0002-0496-0512	432.946	416.394		MAX_2023.03.07-A1-6-T-1.nd2	10	31.532	3.17138	5.36747
MAX_2023.03.07-A1-7-P-1.nd2:0002-0552-0512	529.354			MAX_2023.03.07-A1-7-P-1.nd2	23	31.513	7.29858
MAX_2023.03.07-A1-7-P1-1.nd2:0002-0512-0459	447.852			MAX_2023.03.07-A1-7-P1-1.nd2	13	31.564	4.11862
MAX_2023.03.07-A1-7-S-1.nd2:0002-0589-0512	585.518			MAX_2023.03.07-A1-7-S-1.nd2	20	31.785	6.29228
MAX_2023.03.07-A1-7-T-1.nd2:0002-0647-0512	517.145	519.967		MAX_2023.03.07-A1-7-T-1.nd2	35	65.104	5.37601	5.77137
MAX_2023.03.07-A1-8-P-1.nd2:0002-0512-0627	413.867			MAX_2023.03.07-A1-8-P-1.nd2	18	31.188	5.77145
MAX_2023.03.07-A1-9-P-1.nd2:0002-0569-0512	406.844			MAX_2023.03.07-A1-9-P-1.nd2	17	31.345	5.42351
MAX_2023.03.07-A1-9-S-1.nd2:0002-0523-0519	504.631			MAX_2023.03.07-A1-9-S-1.nd2	25	51.495	4.85484
MAX_2023.03.07-A1-9-T-1.nd2:0002-0544-0512	414.984	435.082		MAX_2023.03.07-A1-9-T-1.nd2	6	31.095	1.92957	5.77145
MAX_2023.03.07-A1-10-F-1.nd2:0002-0512-0659	393.386			MAX_2023.03.07-A1-10-F-1.nd2	21	31.436	6.68024
MAX_2023.03.07-A1-10-S-1.nd2:0002-0512-0604	427.744			MAX_2023.03.07-A1-10-S-1.nd2	44	46.261	9.51125
MAX_2023.03.07-A1-10-T-1.nd2:0002-0512-0525	400.857	407.329		MAX_2023.03.07-A1-10-T-1.nd2	12	31.202	3.84591	6.67913
MAX_2023.03.07-A1-11-P-1.nd2:0002-0512-0472	612.391			MAX_2023.03.07-A1-11-P-1.nd2	35	33.251	10.526
MAX_2023.03.07-A1-11-S-1.nd2:0002-0512-0449	537.371			MAX_2023.03.07-A1-11-S-1.nd2	21	32.001	6.56229
MAX_2023.03.07-A1-11-T-1.nd2:0002-0512-0436	502.534	550.765		MAX_2023.03.07-A1-11-T-1.nd2	13	31.265	4.158	7.0821
GFP-2A-Cre + △SH3				GFP-2A-Cre + △SH3
MAX_2023.03.07-dSH3-1-p-1.nd2:0002-0512-0543	308.979			MAX_2023.03.07-dSH3-1-p-1.nd2:0002-0512-0543	6	30.707	1.95395
MAX_2023.03.07-dSH3-1-P1-1.nd2:0002-0467-0512	259.216			MAX_2023.03.07-dSH3-1-P1-1.nd2:0002-0467-0512	7	30.465	2.29772
MAX_2023.03.07-dSH3-1-S-1.nd2:0002-0530-0512	276.11	281.435		MAX_2023.03.07-dSH3-1-S-1.nd2:0002-0530-0512	3	30.481	0.98422	1.7453
MAX_2023.03.07-dSH3-2-P-1.nd2:0002-0512-0521	316.263			MAX_2023.03.07-dSH3-2-P-1.nd2:0002-0512-0521	14	31.371	4.46272
MAX_2023.03.07-dSH3-2-P1-1.nd2:0002-0451-0512	364.17	340.216		MAX_2023.03.07-dSH3-2-P1-1.nd2:0002-0451-0512	12	31.179	3.84874	4.15573
MAX_2023.03.07-dSH3-3-F-1.nd2:0002-0651-0512	482.381			MAX_2023.03.07-dSH3-3-F-1.nd2:0002-0651-0512	5	31.342	1.5953
MAX_2023.03.07-dSH3-3-P-1.nd2:0002-0512-0594	713.48			MAX_2023.03.07-dSH3-3-P-1.nd2:0002-0512-0594	19	31.423	6.04653
MAX_2023.03.07-dSH3-3-P1-1.nd2:0002-0591-0512	527.627			MAX_2023.03.07-dSH3-3-P1-1.nd2:0002-0591-0512	8	31.243	2.56057
MAX_2023.03.07-dSH3-3-S-1.nd2:0002-0535-0654	413.649			MAX_2023.03.07-dSH3-3-S-1.nd2:0002-0535-0654	13	31.242	4.16107
MAX_2023.03.07-dSH3-3-S1-1.nd2:0002-0577-0512	451.215			MAX_2023.03.07-dSH3-3-S1-1.nd2:0002-0577-0512	27	31.617	8.53971
MAX_2023.03.07-dSH3-3-T-1.nd2:0002-0512-0535	387.339	517.67		MAX_2023.03.07-dSH3-3-T-1.nd2:0002-0512-0535	9	46.519	1.93469	4.13965
MAX_2023.03.07-dSH3-4-F-1.nd2:0002-0512-0458	700.723			MAX_2023.03.07-dSH3-4-F-1.nd2:0002-0512-0458	17	31.482	5.39991
MAX_2023.03.07-dSH3-4-F1-1.nd2:0002-0325-0512	698.599			MAX_2023.03.07-dSH3-4-F1-1.nd2:0002-0325-0512	23	31.026	7.41314
MAX_2023.03.07-dSH3-4-P-1.nd2:0002-0512-0630	401.844			MAX_2023.03.07-dSH3-4-P-1.nd2:0002-0512-0630	22	31.549	6.97328
MAX_2023.03.07-dSH3-4-S-1.nd2:0002-0512-0677	523.307			MAX_2023.03.07-dSH3-4-S-1.nd2:0002-0512-0677	23	31.293	7.34989
MAX_2023.03.07-dSH3-4-T-1.nd2:0002-0512-0629	455.593	556.013		MAX_2023.03.07-dSH3-4-T-1.nd2:0002-0512-0629	8	31.098	2.57251	5.94175
MAX_2023.03.07-dSH3-5-F-1.nd2:0002-0512-0441	382.174			MAX_2023.03.07-dSH3-5-F-1.nd2:0002-0512-0441	13	41.981	3.09664
MAX_2023.03.07-dSH3-5-P-1.nd2:0002-0412-0512	327.371			MAX_2023.03.07-dSH3-5-P-1.nd2:0002-0412-0512	19	37.399	5.08035
MAX_2023.03.07-dSH3-5-P1-1.nd2:0002-0512-0506	345.547			MAX_2023.03.07-dSH3-5-P1-1.nd2:0002-0512-0506	19	31.8	5.97484
MAX_2023.03.07-dSH3-5-S-1.nd2:0002-0512-0539	372.774			MAX_2023.03.07-dSH3-5-S-1.nd2:0002-0512-0539	8	31.92	2.50627
MAX_2023.03.07-dSH3-5-S11-1.nd2:0002-0512-0653	424.209			MAX_2023.03.07-dSH3-5-S11-1.nd2:0002-0512-0653	10	31.601	3.16446
MAX_2023.03.07-dSH3-5-ST-1.nd2:0002-0515-0512	460.745	385.47		MAX_2023.03.07-dSH3-5-ST-1.nd2:0002-0515-0512	18	37.044	4.85909	4.11361
MAX_2023.03.07-dSH3-6-S-1.nd2:0001-0512-0464	350.158			MAX_2023.03.07-dSH3-6-S-1.nd2:0001-0512-0464	24	57.086	4.20418
MAX_2023.03.07-dSH3-7-T-1.nd2:0002-0512-0398	320.382			MAX_2023.03.07-dSH3-7-T-1.nd2:0002-0512-0398	19	32.533	5.84022
MAX_2023.03.07-dSH3-7S-1.nd2:0001-0512-0438	323.486	331.342		MAX_2023.03.07-dSH3-7S-1.nd2:0001-0512-0438	19	31.949	5.94698	5.33046
GFP + Vector				GFP + Vector
Source	mean intensity	mean intensity of per neuron		Source	number	length	number of per 10 μm	number of per neuron
MAX_5-S-1.nd2:0002-0523-0512	471.407			MAX_5-S-1.nd2	10	31.047	3.22092
MAX_5-P-1.nd2:0002-0512-0533	382.565	426.986		MAX_5-P-1.nd2	10	31.771	3.14752	3.18422
MAX_4-T-1.nd2:0002-0508-0512	337.288			MAX_4-T-1.nd2	16	37.106	4.31197
MAX_4-S-1.nd2:0002-0546-0512	347.925			MAX_4-S-1.nd2	22	30.861	7.12874
MAX_4-P-1.nd2:0002-0717-0512	406.508			MAX_4-P-1.nd2	33	31.117	10.6051
MAX_4-F-1.nd2:0002-0547-0512	442.486	383.552		MAX_4-F-1.nd2	20	32.124	6.22587	7.06793
MAX_3-T-1.nd2:0002-0512-0480	434.036			MAX_3-T-1.nd2	29	62.244	4.65908
MAX_3-P-1.nd2:0002-0512-0464	364.067			MAX_3-P-1.nd2	30	62.928	4.76735
MAX_3-F-1.nd2:0002-0512-0605	422.797	406.967		MAX_3-F-1.nd2	21	34.277	6.12656	5.18433
MAX_2-S-1.nd2:0002-0534-0512	438.676			MAX_2-S-1.nd2	7	32.803	2.13395
MAX_2-P-1.nd2:0001-0633-0511	464.366	451.521		MAX_2-P-1.nd2	19	31.659	6.00145	4.0677
MAX_1-S-1.nd2:0002-0481-0512	446.573			MAX_1-S-1.nd2	11	30.673	3.58622
MAX_1-P-1.nd2:0002-0512-0541	446.051	446.312		MAX_1-P-1.nd2	14	30.989	4.51773	4.05197
GFP-2A-Cre + Vector				GFP-2A-Cre + Vector
Source	mean intensity	mean intensity of per neuron		Source	number	length	number of per 10 μm	number of per neuron
MAX_11-T-1.nd2:0002-0515-0512	286.373			MAX_11-T-1.nd2	9	31.204	2.88425
MAX_11-S-1.nd2:0002-0603-0512	383.265			MAX_11-S-1.nd2	11	31.786	3.46064
MAX_11-P-1.nd2:0002-0591-0512	293.285	320.974		MAX_11-P-1.nd2	9	31.632	2.84522	3.06337
MAX_10-T-1.nd2:0002-0512-0494	388.153			MAX_10-T-1.nd2	5	32.169	1.55429
MAX_10-S-1.nd2:0002-0438-0507	311.046			MAX_10-S-1.nd2	10	30.764	3.25055
MAX_10-P-1.nd2:0002-0649-0512	308.925			MAX_10-P-1.nd2	9	30.835	2.91876
MAX_10-F-1.nd2:0002-0512-0482	336.622	336.187		MAX_10-F-1.nd2	6	31.054	1.93212	2.41393
MAX_9-T-1.nd2:0002-0426-0512	343.44			MAX_9-T-1.nd2	1	30.799	0.324686
MAX_9-S-1.nd2:0002-0540-0512	262.739			MAX_9-S-1.nd2	2	31.207	0.640882
MAX_9-P-1.nd2:0002-0502-0512	270.907	292.362		MAX_9-P-1.nd2	4	31.181	1.28283	0.749467
MAX_7-T-1.nd2:0002-0512-0562	237.969			MAX_7-T-1.nd2	2	31.103	0.643025
MAX_7-S-1.nd2:0002-0512-0456	335.146			MAX_7-S-1.nd2	7	32.457	2.1567
MAX_7-P-1.nd2:0002-0512-0498	298.427	290.514		MAX_7-P-1.nd2	5	31.156	1.60483	1.46818
MAX_6-T-1.nd2:0002-0512-0519	332.397			MAX_6-T-1.nd2	4	38.885	1.02867
MAX_6-S-1.nd2:0002-0512-0714	315.597			MAX_6-S-1.nd2	3	31.2	0.961538
MAX_6-P-1.nd2:0002-0512-0527	330.628	326.207		MAX_6-P-1.nd2	6	30.837	1.94571	1.31198
MAX_5-T-1.nd2:0002-0512-0509	293.574			MAX_5-T-1.nd2	4	31.375	1.2749
MAX_5-F-1.nd2:0002-0495-0512	358.109			MAX_5-S-1.nd2	7	30.657	2.28333
MAX_5-S-1.nd2:0002-0675-0512	338.399			MAX_5-P-1.nd2	8	31.789	2.51659
MAX_5-P-1.nd2:0002-0512-0523	359.465	337.387		MAX_4-P-1.nd2	7	31.218	2.2423	2.07928
MAX_4-P-1.nd2:0002-0512-0543	318.045	318.045		MAX_3-S-1.nd2	7	30.654	2.28355	2.28355
MAX_3-S-1.nd2:0002-0524-0512	377.217			MAX_3-T-1.nd2	7	30.888	2.26625
MAX_3-T-1.nd2:0002-0512-0465	383.841			MAX_5-F-1.nd2	5	32.61	1.53327
MAX_3-F-1.nd2:0002-0507-0512	301.679	354.246		MAX_3-F-1.nd2	6	31.708	1.89227	1.89726
MAX_1-p-1.nd2:0002-0512-0432	469.332	469.332		MAX_1-p-1.nd2	8	31.337	2.55289	2.55289
MAX_2-S-1.nd2:0002-0505-0512	316.827	316.827		MAX_2-S-1.nd2	7	63.905	1.09538	1.09538
GFP-2A-Cre + EndoA1				GFP-2A-Cre + EndoA1
Source	mean intensity	mean intensity of per neuron		Source	number	length	number of per 10 μm	number of per neuron
MAX_5-S-1.nd2	578.107			MAX_5-S-1.nd2	20	31.95	6.25978
MAX_5-P-1.nd2	513.044	545.576		MAX_5-P-1.nd2	20	31.049	6.44143	6.35061
MAX_5-T-1.nd2	234.171			MAX_5-T-1.nd2	23	30.12	7.63612
MAX_4-S-1.nd2	634.171	434.171		MAX_4-S-1.nd2	25	31.85	7.84929	7.74271
MAX_3-T-1.nd2	481.154			MAX_3-T-1.nd2	15	31.637	4.74128
MAX_3-S-1.nd2	440.616			MAX_3-S-1.nd2	25	31.513	7.93323
MAX_3-P-1.nd2	471.985	464.585		MAX_3-P-1.nd2	20	31.389	6.37166	6.34873
MAX_1-T-1.nd2	581.288			MAX_1-T-1.nd2	29	31.924	9.08407
MAX_1-S-1.nd2	511.176			MAX_1-S-1.nd2	25	32.186	7.76735
MAX_1-P-1.nd2	576.191	556.218		MAX_1-P-1.nd2	17	33.485	5.0769	7.30944
GFP-2A-Cre + △SH3				GFP-2A-Cre + △SH3
MAX_9-T-1.nd2:0002-0499-0512	454.71			MAX_9-T-1.nd2	11	31.295	3.51494
MAX_9-S-1.nd2:0002-0561-0512	393.922	424.316		MAX_9-S-1.nd2	4	30.509	1.31109	2.41301
MAX_8-S-1.nd2:0002-0343-0512	313.676			MAX_8-S-1.nd2	6	30.926	1.94012
MAX_8-P-1.nd2:0002-0510-0512	354.474			MAX_8-P-1.nd2	12	31.649	3.79159
MAX_8-F-1.nd2:0002-0512-0603	290.742	319.631		MAX_8-F-1.nd2	2	52.793	0.378838	2.03685
MAX_7-T-2.nd2:0002-0441-0512	310.841			MAX_7-T-2.nd2	4	31.348	1.276
MAX_8-S-1.nd2:0002-0556-0515	339.883			MAX_8-S-1.nd2	10	59.739	1.67395
MAX_7-S-1.nd2:0002-0512-0554	293.716			MAX_7-S-1.nd2	7	32.259	2.16994
MAX_7-P-1.nd2:0002-0475-0512	321.09	316.382		MAX_7-P-1.nd2	8	31.731	2.52119	1.91027
MAX_6-T-1.nd2:0002-0524-0512	276.664			MAX_6-T-1.nd2	5	29.659	1.68583
MAX_6-S-1.nd2:0002-0512-0474	260.662			MAX_6-S-1.nd2	7	31.493	2.22272
MAX_6-P-1.nd2:0002-0518-0512	326.095			MAX_6-P-1.nd2	14	31.915	4.38665
MAX_6-F-1.nd2:0002-0512-0562	308.547	292.992		MAX_6-F-1.nd2	4	32.035	1.24863	2.38596
MAX_5-T-1.nd2:0002-0384-0512	350.392			MAX_5-T-1.nd2	6	45.708	1.31268
MAX_5-S-1.nd2:0002-0571-0512	404.01			MAX_5-S-1.nd2	5	31.537	1.58544
MAX_5-P-1.nd2:0002-0578-0512	296.712			MAX_5-P-1.nd2	7	29.796	2.34931
MAX_5-F-1.nd2:0002-0512-0539	294.092	336.301		MAX_5-F-1.nd2	10	37.803	2.64529	1.97318
MAX_4-T-1.nd2:0002-0322-0517	306.005			MAX_4-T-1.nd2	5	65.734	0.760641
MAX_4-S-1.nd2:0002-0476-0512	411.738			MAX_4-S-1.nd2	4	32.348	1.23655
MAX_4-P-1.nd2:0002-0470-0512	348.143			MAX_4-P-1.nd2	6	30.094	1.99375
MAX_4-F-1.nd2:0002-0732-0512	380.821	361.677		MAX_4-F-1.nd2	8	39.852	2.00743	1.49959
MAX_3-T-1.nd2:0002-0560-0512	308.939			MAX_3-T-1.nd2	8	31.942	2.50454
MAX_3-S-1.nd2:0002-0489-0512	385.184			MAX_3-P-1.nd2	5	32.217	1.55198
MAX_3-P-1.nd2:0002-0530-0512	357.968			MAX_3-F-1.nd2	6	31.456	1.90743	1.98798
MAX_3-F-1.nd2:0002-0592-0512	377.488	357.395		MAX_2-T-1.nd2	6	31.475	1.90627
MAX_2-T-1.nd2:0002-0512-0436	326.603			MAX_2-S-1.nd2	7	31.513	2.22131
MAX_2-S-1.nd2:0002-0512-0504	284.478			MAX_2-P-1.nd2	12	31.275	3.83693
MAX_2-P-1.nd2:0002-0561-0398	322.734			MAX_2-F-1.nd2	5	31.185	1.60333	2.39196
MAX_2-F-1.nd2:0002-0512-0485	300.535	308.587		MAX_1-S-1.nd2	8	31.617	2.53028
MAX_1-S-1.nd2:0003-0580-0512	348.078			MAX_1-P-1.nd2	13	32.372	4.01582	3.27305
MAX_1-P-1.nd2:0003-0524-0516	343.051	345.565
GFP-2A-Cre + aa172-352				GFP-2A-Cre + aa172-352
MAX_8-T-1.nd2:0002-0534-0512	386.842			MAX_8-T-1.nd2:0002-0534-0512	15	31.406	4.77616
MAX_8-P-1.nd2:0002-0540-0512	297.57			MAX_8-P-1.nd2:0002-0540-0512	11	31.482	3.49406
MAX_8-P-1.nd2:0002-0534-0512	366.563	350.325		MAX_8-P-1.nd2:0002-0534-0512	11	31.05	3.54267	3.93763
MAX_7-T-1.nd2:0002-0536-0512	396.799			MAX_7-T-1.nd2:0002-0536-0512	15	31.82	4.71402
MAX_7-S-1.nd2:0002-0498-0512	407.905			MAX_7-S-1.nd2:0002-0498-0512	9	31.048	2.89874
MAX_7-P-1.nd2:0002-0315-0517	420.62	408.441		MAX_7-P-1.nd2:0002-0315-0517	14	43.718	3.20234	3.60503
MAX_6-S-1.nd2:0002-0503-0512	419.065			MAX_6-S-1.nd2:0002-0503-0512	9	30.603	2.94089
MAX_6-P-1.nd2:0002-0494-0512	343.089	381.077		MAX_6-P-1.nd2:0002-0494-0512	12	31.16	3.85109	3.39599
MAX_5-S-1.nd2:0002-0512-0489	404.008			MAX_5-S-1.nd2:0002-0512-0489	5	31.664	1.57908	1.57908
MAX_5-P-1.nd2:0002-0512-0681	329.985	366.997		MAX_5-P-1.nd2:0002-0512-0681	8	30.64	2.61097
MAX_4-T-1.nd2:0002-0457-0512	288.234			MAX_4-T-1.nd2:0002-0457-0512	7	32.186	2.17486	2.39291
MAX_4-S-1.nd2:0002-0418-0512	351.656	319.945		MAX_4-S-1.nd2:0002-0418-0512	9	32.547	2.76523	1.53624
MAX_2-S-1.nd2:0002-0468-0488	366.783	366.783		MAX_2-S-1.nd2:0002-0468-0488	7	31.459	2.22512	2.22512
MAX_3-S-1.nd2:0002-0512-0536	340.69			MAX_3-S-1.nd2:0002-0512-0536	4	32.28	1.23916
MAX_3-F-1.nd2:0002-0512-0551	430.146			MAX_3-F-1.nd2:0002-0512-0551	13	45.259	2.87236
MAX_3-P-1.nd2:0002-0464-0512	423.202	398.013		MAX_3-P-1.nd2:0002-0464-0512	4	30.292	1.32048	1.81066
MAX_1-S-1.nd2:0002-0600-0512	361.111			MAX_1-S-1.nd2:0002-0600-0512	10	31.101	3.21533
MAX_1-P-1.nd2:0002-0512-0428	313.593	337.352		MAX_1-P-1.nd2:0002-0512-0428	6	31.534	1.90271	2.55902
GFP + Vector				GFP + Vector
MAX_5-P-1-1.nd2:0001-0543-0512	762.864			MAX_5-P-1-1.nd2	22	31.855	6.90629
MAX_5-S-1.nd2:0001-0514-0512	780.497	771.681		MAX_5-S-1.nd2	33	31.038	10.6321	8.76921
MAX_4-T-1.nd2:0001-0413-0512	792.457			MAX_4-T-1.nd2	22	43.78	5.02513
MAX_4-S-1.nd2:0001-0512-0590	746.829			MAX_4-S-1.nd2	21	31.265	6.71678
MAX_4-P-1.nd2:0001-0512-0512	753.636	764.307		MAX_4-P-1.nd2	18	31.415	5.72975	5.82388
MAX_3-T-1.nd2:0001-0431-0512	676.589			MAX_3-T-1.nd2	12	33.496	3.58252
MAX_3-S-1.nd2:0001-0549-0512	692.231			MAX_3-S-1.nd2	19	42.483	4.47238
MAX_3-P-1.nd2:0001-0528-0512	721.605	696.808		MAX_3-P-1.nd2	27	31.283	8.63089	5.56193
MAX_2-T-1.nd2:0001-0610-0512	578.393			MAX_2-T-1.nd2	5	32.363	1.54497
MAX_2-P-1.nd2:0001-0512-0417	712.847	645.62		MAX_2-P-1.nd2	20	31.066	6.43791	3.99144
MAX_1-S-1.nd2:0001-0512-0521	701.243			MAX_1-S-1.nd2	16	31.446	5.08809
MAX_1-P-1.nd2:0001-0512-0511	733.436	717.34		MAX_1-P-1.nd2	22	32.036	6.86727	5.97768
GFP-2A-Cre + aa172-352				GFP-2A-Cre + aa172-352
MAX_4-T-1.nd2:0001-0512-0585	431.202			MAX_4-T-1.nd2	13	66.948	1.94181
MAX_4-S-1.nd2:0001-0524-0512	582.23			MAX_4-S-1.nd2	18	32.169	5.59545
MAX_4-P-1.nd2:0001-0526-0512	554.955	522.796		MAX_4-P-1.nd2	8	32.864	2.43427	3.32384
MAX_3-T-1.nd2:0001-0512-0484	387.031			MAX_3-T-1.nd2	11	31.581	3.48311
MAX_3-S-1.nd2:0001-0512-0655	424.121			MAX_3-S-1.nd2	11	31.289	3.51561
MAX_3-P-1.nd2:0001-0524-0512	230.696	347.283		MAX_3-P-1.nd2	5	31.821	1.57129	2.85667
MAX_2-T-1.nd2:0001-0512-0259	309.878			MAX_2-T-1.nd2	2	36.728	0.544544
MAX_2-S-1.nd2:0001-0690-0512	351.937			MAX_2-S-1.nd2	12	31.05	3.86473
MAX_2-P-1.nd2:0001-0512-0478	309.036	323.617		MAX_2-P-1.nd2	15	32.178	4.66157	3.02362
MAX_1-P-1.nd2:0001-0390-0512	238.981			MAX_1-P-1.nd2	7	31.908	2.19381
MAX_13-T-1.nd2:0001-0488-0512	722.573			MAX_13-T-1.nd2	6	32.334	1.85563
MAX_13-S-1.nd2:0001-0512-0470	495.781			MAX_13-S-1.nd2	8	40.031	1.99845
MAX_13-P-1.nd2:0001-0512-0435	655.272	528.152		MAX_13-P-1.nd2	9	33.925	2.65291	2.1752
MAX_12-T-1.nd2:0001-0512-0704	629.633			MAX_12-T-1.nd2	1	31.53	0.317158
MAX_12-S-1.nd2:0001-0512-0502	513.301			MAX_12-S-1.nd2	7	32.232	2.17175
MAX_12-P-1.nd2:0001-0512-0533	441.498	528.144		MAX_12-P-1.nd2	10	31.339	3.19091	1.89328
MAX_11-S-1.nd2:0001-0539-0512	447.407			MAX_11-S-1.nd2	14	31.457	4.45052
MAX_11-P-1.nd2:0001-0485-0512	413.287	430.347		MAX_11-P-1.nd2	7	31.075	2.25261	3.35157
MAX_10-T-1.nd2:0001-0512-0435	451.955			MAX_10-T-1.nd2	7	31.999	2.18757
MAX_10-S-1.nd2:0001-0512-0586	405.085			MAX_10-S-1.nd2	11	31.409	3.50218
MAX_10-P-1.nd2:0001-0512-0458	519.959	459		MAX_10-P-1.nd2	25	31.741	7.87625	4.522
MAX_9-T-1.nd2:0001-0512-0337	574.737			MAX_9-T-1.nd2	22	31.912	6.89396
MAX_9-S-1.nd2:0001-0512-0491	580.34			MAX_9-S-1.nd2	11	30.984	3.55022
MAX_9-P-1.nd2:0001-0512-0529	432.019	529.032		MAX_9-P-1.nd2	11	31.559	3.48554	4.64324
MAX_8-T-1.nd2:0001-0512-0564	657.221			MAX_8-T-1.nd2	10	34.387	2.90808
MAX_8-S-1.nd2:0001-0512-0450	544.36			MAX_8-S-1.nd2	27	32.419	8.32845
MAX_8-P-1.nd2:0001-0512-0512	595.459			MAX_8-P-1.nd2	12	31.433	3.81764
MAX_8-F-1.nd2:0001-0512-0504	655.648	613.172		MAX_8-F-1.nd2	8	32.182	2.48586	4.38501
MAX_7-T-1.nd2:0001-0545-0512	547.463			MAX_7-T-1.nd2	12	32.507	3.69151
MAX_7-P-1.nd2:0001-0499-0512	692.583	620.023		MAX_7-P-1.nd2	21	31.967	6.56927	5.13039
MAX_6-T-1.nd2:0001-0621-0512	687.648			MAX_6-T-1.nd2	8	30.868	2.59168
MAX_6-S-1.nd2:0001-0408-0512	774.181			MAX_6-S-1.nd2	16	31.058	5.15165
MAX_6-P-1.nd2:0001-0618-0512	708.197	723.342		MAX_6-P-1.nd2	8	31.038	2.57749	3.44027
MAX_5-S-1.nd2:0001-0512-0499	417.92			MAX_5-S-1.nd2	6	34.394	1.74449
MAX_5-P-1.nd2:0001-0440-0512	561.537	489.728		MAX_5-P-1.nd2	18	31.284	5.75374	3.74912
GFP + Vector				GFP + Vector
MAX_5-S-1.nd2:0002-0523-0512	471.407			MAX_5-S-1.nd2	10	31.047	3.22092
MAX_5-P-1.nd2:0002-0512-0533	382.565	426.986		MAX_5-P-1.nd2	10	31.771	3.14752	3.18422
MAX_4-T-1.nd2:0002-0508-0512	337.288			MAX_4-T-1.nd2	16	37.106	4.31197
MAX_4-S-1.nd2:0002-0546-0512	347.925			MAX_4-S-1.nd2	22	30.861	7.12874
MAX_4-P-1.nd2:0002-0717-0512	406.508			MAX_4-P-1.nd2	33	31.117	10.6051
MAX_4-F-1.nd2:0002-0547-0512	442.486	383.552		MAX_4-F-1.nd2	20	32.124	6.22587	7.06793
MAX_3-T-1.nd2:0002-0512-0480	434.036			MAX_3-T-1.nd2	29	62.244	4.65908
MAX_3-P-1.nd2:0002-0512-0464	364.067			MAX_3-P-1.nd2	30	62.928	4.76735
MAX_3-F-1.nd2:0002-0512-0605	422.797	406.967		MAX_3-F-1.nd2	21	34.277	6.12656	5.18433
MAX_2-S-1.nd2:0002-0534-0512	438.676			MAX_2-S-1.nd2	7	32.803	2.13395
MAX_2-P-1.nd2:0001-0633-0511	464.366	451.521		MAX_2-P-1.nd2	19	31.659	6.00145	4.0677
MAX_1-S-1.nd2:0002-0481-0512	446.573			MAX_1-S-1.nd2	11	30.673	3.58622
MAX_1-P-1.nd2:0002-0512-0541	446.051	446.312		MAX_1-P-1.nd2	14	30.989	4.51773	4.05197
GFP-2A-Cre + EndoA1				GFP-2A-Cre + EndoA1
MAX_5-S-1.nd2:0002-0512-0477	578.107			MAX_5-S-1.nd2	20	31.95	6.25978
MAX_5-P-1.nd2:0002-0458-0512	513.044	545.576		MAX_5-P-1.nd2	20	31.049	6.44143	6.35061
MAX_4-S-1.nd2:0002-0512-0550	634.171	434.171		MAX_4-S-1.nd2	24	30.997	7.74268	7.74268
MAX_3-T-1.nd2:0002-0547-0512	481.154			MAX_3-T-1.nd2	15	31.637	4.74128
MAX_3-S-1.nd2:0002-0512-0573	440.616			MAX_3-S-1.nd2	25	31.513	7.93323
MAX_3-P-1.nd2:0002-0512-0478	471.985	464.585		MAX_3-P-1.nd2	20	31.389	6.37166	6.34873
MAX_1-T-1.nd2:0002-0483-0504	581.288			MAX_1-T-1.nd2	29	31.924	9.08407
MAX_1-S-1.nd2:0002-0552-0512	511.176			MAX_1-S-1.nd2	25	32.186	7.76735
MAX_1-P-1.nd2:0002-0479-0512	576.191	556.218		MAX_1-P-1.nd2	17	33.485	5.0769	7.30944
GFP-2A-Cre + aa172-352				GFP-2A-Cre + EndoA1
MAX_8-T-1.nd2:0002-0534-0512	386.842			MAX_8-T-1.nd2	15	31.406	4.77616
MAX_8-P-1.nd2:0002-0540-0512	297.57			MAX_8-P-1.nd2	11	31.482	3.49406
MAX_8-P-1.nd2:0002-0534-0512	366.563	350.325		MAX_8-P-1.nd2	11	31.05	3.54267	3.93763
MAX_7-T-1.nd2:0002-0536-0512	396.799			MAX_7-T-1.nd2	15	31.82	4.71402
MAX_7-S-1.nd2:0002-0498-0512	407.905			MAX_7-S-1.nd2	9	31.048	2.89874
MAX_7-P-1.nd2:0002-0315-0517	420.62	408.441		MAX_7-P-1.nd2	14	43.718	3.20234	3.60503
MAX_6-S-1.nd2:0002-0503-0512	419.065			MAX_6-S-1.nd2	9	30.603	2.94089
MAX_6-P-1.nd2:0002-0494-0512	343.089	381.077		MAX_6-P-1.nd2	12	31.16	3.85109	3.39599
MAX_5-S-1.nd2:0002-0512-0489	404.008			MAX_5-P-1.nd2	5	31.664	1.57908	1.57908
MAX_5-P-1.nd2:0002-0512-0681	329.985	366.997		MAX_4-T-1.nd2	8	30.64	2.61097
MAX_4-T-1.nd2:0002-0457-0512	288.234			MAX_4-S-1.nd2	7	32.186	2.17486	2.39291
MAX_4-S-1.nd2:0002-0418-0512	351.656	319.945		MAX_5-S-1.nd2	9	32.547	2.76523	1.53624
MAX_2-S-1.nd2:0002-0468-0488	366.783	366.783		MAX_2-S-1.nd2	7	31.459	2.22512	2.22512
MAX_3-S-1.nd2:0002-0512-0536	340.69			MAX_3-S-1.nd2	4	32.28	1.23916
MAX_3-F-1.nd2:0002-0512-0551	430.146			MAX_3-F-1.nd2	13	45.259	2.87236
MAX_3-P-1.nd2:0002-0464-0512	423.202	398.013		MAX_3-P-1.nd2	4	30.292	1.32048	1.81066
MAX_1-S-1.nd2:0002-0600-0512	361.111			MAX_1-S-1.nd2	10	31.101	3.21533
MAX_1-P-1.nd2:0002-0512-0428	313.593	337.352		MAX_1-P-1.nd2	6	31.534	1.90271	2.55902
GFP-2A-Cre + △SH3				GFP-2A-Cre + EndoA1
MAX_9-T-1.nd2:0002-0499-0512	454.71			MAX_9-T-1.nd2	11	31.295	3.51494
MAX_9-S-1.nd2:0002-0561-0512	393.922	424.316		MAX_9-S-1.nd2	4	30.509	1.31109	2.41301
MAX_8-S-1.nd2:0002-0343-0512	313.676			MAX_8-S-1.nd2	6	30.926	1.94012
MAX_8-P-1.nd2:0002-0510-0512	354.474			MAX_8-P-1.nd2	12	31.649	3.79159
MAX_8-F-1.nd2:0002-0512-0603	290.742	319.631		MAX_8-F-1.nd2	2	52.793	0.378838	2.03685
MAX_7-T-2.nd2:0002-0441-0512	310.841			MAX_7-T-2.nd2	4	31.348	1.276
MAX_8-S-1.nd2:0002-0556-0515	339.883			MAX_8-S-1.nd2	10	59.739	1.67395
MAX_7-S-1.nd2:0002-0512-0554	293.716			MAX_7-S-1.nd2	7	32.259	2.16994
MAX_7-P-1.nd2:0002-0475-0512	321.09	316.382		MAX_7-P-1.nd2	8	31.731	2.52119	1.91027
MAX_6-T-1.nd2:0002-0524-0512	276.664			MAX_6-T-1.nd2	5	29.659	1.68583
MAX_6-S-1.nd2:0002-0512-0474	260.662			MAX_6-S-1.nd2	7	31.493	2.22272
MAX_6-P-1.nd2:0002-0518-0512	326.095			MAX_6-P-1.nd2	14	31.915	4.38665
MAX_6-F-1.nd2:0002-0512-0562	308.547	292.992		MAX_6-F-1.nd2	4	32.035	1.24863	2.38596
MAX_5-T-1.nd2:0002-0384-0512	350.392			MAX_5-T-1.nd2	6	45.708	1.31268
MAX_5-S-1.nd2:0002-0571-0512	404.01			MAX_5-S-1.nd2	5	31.537	1.58544
MAX_5-P-1.nd2:0002-0578-0512	296.712			MAX_5-P-1.nd2	7	29.796	2.34931
MAX_5-F-1.nd2:0002-0512-0539	294.092	336.301		MAX_5-F-1.nd2	10	37.803	2.64529	1.97318
MAX_4-T-1.nd2:0002-0322-0517	306.005			MAX_4-T-1.nd2	5	65.734	0.760641
MAX_4-S-1.nd2:0002-0476-0512	411.738			MAX_4-S-1.nd2	4	32.348	1.23655
MAX_4-P-1.nd2:0002-0470-0512	348.143			MAX_4-P-1.nd2	6	30.094	1.99375
MAX_4-F-1.nd2:0002-0732-0512	380.821	361.677		MAX_4-F-1.nd2	8	39.852	2.00743	1.49959
MAX_3-T-1.nd2:0002-0560-0512	308.939			MAX_3-T-1.nd2	8	31.942	2.50454
MAX_3-S-1.nd2:0002-0489-0512	385.184
MAX_3-P-1.nd2:0002-0530-0512	357.968			MAX_3-P-1.nd2	5	32.217	1.55198
MAX_3-F-1.nd2:0002-0592-0512	377.488	357.395		MAX_3-F-1.nd2	6	31.456	1.90743	1.98798
MAX_2-T-1.nd2:0002-0512-0436	326.603			MAX_2-T-1.nd2	6	31.475	1.90627
MAX_2-S-1.nd2:0002-0512-0504	284.478			MAX_2-S-1.nd2	7	31.513	2.22131
MAX_2-P-1.nd2:0002-0561-0398	322.734			MAX_2-P-1.nd2	12	31.275	3.83693
MAX_2-F-1.nd2:0002-0512-0485	300.535	308.587		MAX_2-F-1.nd2	5	31.185	1.60333	2.39196
MAX_1-S-1.nd2:0003-0580-0512	348.078			MAX_1-S-1.nd2	8	31.617	2.53028
MAX_1-P-1.nd2:0003-0524-0516	343.051	345.565		MAX_1-P-1.nd2	13	32.372	4.01582	3.27305
GFP + Vector				GFP + Vector
Source	MeanGreen			Source
20200830-S1-GPN-WT-V-1-100-4Z-S3-MaxIP	223.68			20200830-S1-GPN-WT-V-1-100-4Z-S3-MaxIP	16	61	2.62295
20200830-S1-GPN-WT-V-1-100-4Z-P-MaxIP	304.77			20200830-S1-GPN-WT-V-1-100-4Z-P-MaxIP	17	54.26	3.13306
20200830-S1-GPN-WT-V-1-100-4Z-S-MaxIP	220.88			20200830-S1-GPN-WT-V-1-100-4Z-S-MaxIP	14	32.61	4.29316
20200830-S1-GPN-WT-V-1-100-4Z-S1.ics	226.66	243.998		20200830-S1-GPN-WT-V-1-100-4Z-S1.ics	13	30.64	4.24282	3.573
20200830-S1-GPN-WT-V-3-100-4Z-P-MaxIP	708.17			20200830-S1-GPN-WT-V-3-100-4Z-P-MaxIP	10	28.99	3.44947
20200830-S1-GPN-WT-V-3-100-4Z-P4-MaxIP	567.33			20200830-S1-GPN-WT-V-3-100-4Z-P4-MaxIP	27	64.94	4.15768
20200830-S1-GPN-WT-V-3-100-4Z-S-MaxIP	342.92			20200830-S1-GPN-WT-V-3-100-4Z-S-MaxIP	6	26.43	2.27015
20200830-S1-GPN-WT-V-3-100-4Z-S2-MaxIP	665.23			20200830-S1-GPN-WT-V-3-100-4Z-S2-MaxIP	22	31.73	6.9335
20200830-S1-GPN-WT-V-3-100-4Z-S2-MaxIP	602.3			20200830-S1-GPN-WT-V-3-100-4Z-S2-MaxIP	17	31.68	5.36616
20200830-S1-GPN-WT-V-3-100-4Z-T-MaxIP	1055.46	656.902		20200830-S1-GPN-WT-V-3-100-4Z-T-MaxIP	15	31.05	4.83092	4.50131
20200830-S1-GPN-WT-V-4-100-4Z-P-MaxIP	458.95			20200830-S1-GPN-WT-V-4-100-4Z-P-MaxIP	8	36.9	2.16802
20200830-S1-GPN-WT-V-4-100-4Z-P1-MaxIP	491	474.975		20200830-S1-GPN-WT-V-4-100-4Z-P1-MaxIP	33	68.3	4.83163	3.49982
20200830-S1-GPN-WT-V-5-100-4Z-S-MaxIP	286.93			20200830-S1-GPN-WT-V-5-100-4Z-S-MaxIP	20	38.51	5.19346
20200830-S1-GPN-WT-V-5-100-4Z-P-MaxIP	360.67			20200830-S1-GPN-WT-V-5-100-4Z-P-MaxIP	48	91.77	5.23047
20200830-S1-GPN-WT-V-5-100-4Z-P1-MaxIP	362.46			20200830-S1-GPN-WT-V-5-100-4Z-P1-MaxIP	17	49.67	3.42259
20200830-S1-GPN-WT-V-5-100-4Z-P3-MaxIP	293.41			20200830-S1-GPN-WT-V-5-100-4Z-P3-MaxIP	14	30.41	4.60375
20200830-S1-GPN-WT-V-6-100-4Z-P1-MaxIP	442.57			20200830-S1-GPN-WT-V-6-100-4Z-P1-MaxIP	16	32.5	4.92308
20200830-S1-GPN-WT-V-5-100-4Z-S1-MaxIP	316.97			20200830-S1-GPN-WT-V-5-100-4Z-S1-MaxIP	58	49.95	11.6116
20200830-S1-GPN-WT-V-5-100-4Z-S2-MaxIP	847.37	415.769		20200830-S1-GPN-WT-V-5-100-4Z-S2-MaxIP	21	41.81	5.02272	5.71538
20200830-S1-GPN-WT-V-6-100-4Z-P-MaxIP	377.79			20200830-S1-GPN-WT-V-6-100-4Z-P-MaxIP	8	42.27	1.8926
20200830-S1-GPN-WT-V-6-100-4Z-P2-MaxIP	522.26			20200830-S1-GPN-WT-V-6-100-4Z-P2-MaxIP	30	81.07	3.70051
20200830-S1-GPN-WT-V-6-100-4Z-P3-MaxIP	544.24			20200830-S1-GPN-WT-V-6-100-4Z-P3-MaxIP	23	49.8	4.61847
20200830-S1-GPN-WT-V-6-100-4Z-P4.ics	400.25	461.135		20200830-S1-GPN-WT-V-6-100-4Z-P4.ics	23	71.71	3.20736	3.35473
20200830-S1-GPN-WT-V-7-100-4Z-F-MaxIP	297.52			20200830-S1-GPN-WT-V-7-100-4Z-F-MaxIP	19	66.32	2.8649
20200830-S1-GPN-WT-V-7-100-4Z-S-MaxIP	291.81			20200830-S1-GPN-WT-V-7-100-4Z-S-MaxIP	4	31.1	1.28617
20200830-S1-GPN-WT-V-7-100-4Z-P-MaxIP	450.32			20200830-S1-GPN-WT-V-7-100-4Z-P-MaxIP	7	30.17	2.32019
20200830-S1-GPN-WT-V-7-100-4Z-P1-MaxIP	643.6			20200830-S1-GPN-WT-V-7-100-4Z-P1-MaxIP	21	34.23	6.13497
20200830-S1-GPN-WT-V-7-100-4Z-P2-MaxIP	412.28			20200830-S1-GPN-WT-V-7-100-4Z-P2-MaxIP	14	55.3	2.53165
20200830-S1-GPN-WT-V-7-100-4Z-P3-MaxIP	413.01	418.09		20200830-S1-GPN-WT-V-7-100-4Z-P3-MaxIP	12	60.97	1.96818	2.85101
20200830-S1-GPN-WT-V-8-100-4Z-P-MaxIP	488.48			20200830-S1-GPN-WT-V-8-100-4Z-P-MaxIP	10	44.3	2.25734
20200830-S1-GPN-WT-V-8-100-4Z-P1-MaxIP	524.68	506.58		20200830-S1-GPN-WT-V-8-100-4Z-P1-MaxIP	15	43.68	3.43407	2.8457
20200830-S1-GPN-WT-V-9-100-4Z-S-MaxIP	423.9			20200830-S1-GPN-WT-V-9-100-4Z-S-MaxIP	7	28.97	2.41629
20200830-S1-GPN-WT-V-9-100-4Z-P-MaxIP	458.05			20200830-S1-GPN-WT-V-9-100-4Z-P-MaxIP	19	49.23	3.85944
20200830-S1-GPN-WT-V-9-100-4Z-P1-MaxIP	357.37			20200830-S1-GPN-WT-V-9-100-4Z-P1-MaxIP	5	39.43	1.26807
20200830-S1-GPN-WT-V-9-100-4Z-P4-MaxIP	390.73			20200830-S1-GPN-WT-V-9-100-4Z-P4-MaxIP	9	31.12	2.89203
20200830-S1-GPN-WT-V-9-100-4Z-S-MaxIP	412.19	408.448		20200830-S1-GPN-WT-V-9-100-4Z-S-MaxIP	5	27.85	1.79533	2.44623
GFP-2A-Cre + Vector				GFP-2A-Cre + Vector
20200830-S2-GPN-KO-V-1-100-4Z-P-MaxIP	458.59			20200830-S2-GPN-KO-V-1-100-4Z-P-MaxIP	12	33.17	3.61773
20200830-S2-GPN-KO-V-1-100-4Z-P1-MaxIP	289.04			20200830-S2-GPN-KO-V-1-100-4Z-P1-MaxIP	22	45.27	4.85973
20200830-S2-GPN-KO-V-1-100-4Z-P2-MaxIP	340.49	362.707		20200830-S2-GPN-KO-V-1-100-4Z-P2-MaxIP	10	31.7	3.15457	3.87734
20200830-S2-GPN-KO-V-2-100-4Z-P-MaxIP	441.73			20200830-S2-GPN-KO-V-2-100-4Z-P-MaxIP	21	31.58	6.64978
20200830-S2-GPN-KO-V-2-100-4Z-P1-MaxIP	366.31			20200830-S2-GPN-KO-V-2-100-4Z-P1-MaxIP	20	31.9	6.26959
20200830-S2-GPN-KO-V-2-100-4Z-S-MaxIP	297.56	368.533		20200830-S2-GPN-KO-V-2-100-4Z-S-MaxIP	27	50	5.4	6.10646
20200830-S2-GPN-KO-V-3-100-4Z-F-MaxIP	253.29			20200830-S2-GPN-KO-V-3-100-4Z-F-MaxIP	15	32.56	4.60688
20200830-S2-GPN-KO-V-3-100-4Z-P-MaxIP	402.16			20200830-S2-GPN-KO-V-3-100-4Z-P-MaxIP	23	47.84	4.80769
20200830-S2-GPN-KO-V-3-100-4Z-S1-MaxIP	231.29			20200830-S2-GPN-KO-V-3-100-4Z-S1-MaxIP	7
20200830-S2-GPN-KO-V-3-100-4Z-P1-MaxIP	305.32			20200830-S2-GPN-KO-V-3-100-4Z-P1-MaxIP	15	51.86	2.8924
20200830-S2-GPN-KO-V-3-100-4Z-P2-MaxIP	444.56			20200830-S2-GPN-KO-V-3-100-4Z-P2-MaxIP	17	43.86	3.87597
20200830-S2-GPN-KO-V-3-100-4Z-P3-MaxIP	287.22			20200830-S2-GPN-KO-V-3-100-4Z-P3-MaxIP	20	45	4.44444
20200830-S2-GPN-KO-V-3-100-4Z-S-MaxIP	341.74			20200830-S2-GPN-KO-V-3-100-4Z-S-MaxIP	13	38.41	3.38454
20200830-S2-GPN-KO-V-3-100-4Z-S1-MaxIP	274.18	317.47		20200830-S2-GPN-KO-V-3-100-4Z-S1-MaxIP	13	71.78	1.81109	3.689
20200830-S2-GPN-KO-V-4-100-4Z-P-MaxIP	265.61			20200830-S2-GPN-KO-V-4-100-4Z-P-MaxIP	7	31.26	2.23928
20200830-S2-GPN-KO-V-4-100-4Z-P3-MaxIP	254.28			20200830-S2-GPN-KO-V-4-100-4Z-P3-MaxIP	5	35.3	1.41643
20200830-S2-GPN-KO-V-4-100-4Z-T-MaxIP	317.33			20200830-S2-GPN-KO-V-4-100-4Z-T-MaxIP	7	32.01	2.18682
20200830-S2-GPN-KO-V-4-100-4Z-P1-MaxIP	196.55			20200830-S2-GPN-KO-V-4-100-4Z-P1-MaxIP	7	34.44	2.03252
20200830-S2-GPN-KO-V-4-100-4Z-P3-MaxIP	246.92			20200830-S2-GPN-KO-V-4-100-4Z-P3-MaxIP	8	36.05	2.21914
20200830-S2-GPN-KO-V-4-100-4Z-S-MaxIP	233.47	252.36		20200830-S2-GPN-KO-V-4-100-4Z-S-MaxIP	5	35.5	1.40845	1.91711
20200830-S2-GPN-KO-V-5-100-4Z-P-MaxIP	331.37			20200830-S2-GPN-KO-V-5-100-4Z-P-MaxIP	10	38.51	2.59673
20200830-S2-GPN-KO-V-5-100-4Z-P1-MaxIP	370.52	350.945		20200830-S2-GPN-KO-V-5-100-4Z-P1-MaxIP	16	32.42	4.93523	3.76598
20200830-S2-GPN-KO-V-6-100-4Z-P-MaxIP	467.18			20200830-S2-GPN-KO-V-6-100-4Z-P-MaxIP	19	50.71	3.7468
20200830-S2-GPN-KO-V-6-100-4Z-P2-MaxIP	420.06			20200830-S2-GPN-KO-V-6-100-4Z-P2-MaxIP	14	81.39	1.72011
20200830-S2-GPN-KO-V-6-100-4Z-S-MaxIP	244.09			20200830-S2-GPN-KO-V-6-100-4Z-S-MaxIP	3	31.79	0.943693
20200830-S2-GPN-KO-V-6-100-4Z-T2-MaxIP	210.49			20200830-S2-GPN-KO-V-6-100-4Z-T2-MaxIP	2	32.64	0.612745
20200830-S2-GPN-KO-V-6-100-4Z-S1-MaxIP	356.69			20200830-S2-GPN-KO-V-6-100-4Z-S1-MaxIP	6	31.48	1.90597
20200830-S2-GPN-KO-V-6-100-4Z-S2-MaxIP	287.11			20200830-S2-GPN-KO-V-6-100-4Z-S2-MaxIP	4	35.84	1.11607
20200830-S2-GPN-KO-V-6-100-4Z-S3-MaxIP	234.72			20200830-S2-GPN-KO-V-6-100-4Z-S3-MaxIP	8	31.38	2.54939
20200830-S2-GPN-KO-V-6-100-4Z-T1-MaxIP	112.22	291.57		20200830-S2-GPN-KO-V-6-100-4Z-T1-MaxIP	1	33.08	0.302297	1.61214
20200830-S2-GPN-KO-V-7-100-4Z-P-MaxIP	348.17			20200830-S2-GPN-KO-V-7-100-4Z-P-MaxIP	13	31.38	4.14277
20200830-S2-GPN-KO-V-7-100-4Z-P1-MaxIP	336.22			20200830-S2-GPN-KO-V-7-100-4Z-P1-MaxIP	8	54.74	1.46145
20200830-S2-GPN-KO-V-7-100-4Z-S-MaxIP	150.63	243.425		20200830-S2-GPN-KO-V-7-100-4Z-S-MaxIP	7	31.75	2.20472	2.80211
GFP-2A-Cre + EndoA1				GFP-2A-Cre + EndoA1
20200830-S2-GPN-KO-A1-1-100-4Z-P-MaxIP	528.86			20200830-S2-GPN-KO-A1-1-100-4Z-P-MaxIP	7	31.82	2.19987
20200830-S2-GPN-KO-A1-1-100-4Z-P1-MaxIP	437.87	483.365		20200830-S2-GPN-KO-A1-1-100-4Z-P1-MaxIP	17	32.6	5.21472	3.7073
20200830-S2-GPN-KO-A1-2-100-4Z-P-MaxIP	404.43			20200830-S2-GPN-KO-A1-2-100-4Z-P-MaxIP	27	66.52	4.05893
20200830-S2-GPN-KO-A1-2-100-4Z-P2-MaxIP	402.19			20200830-S2-GPN-KO-A1-2-100-4Z-P2-MaxIP	17	38.66	4.39731
20200830-S2-GPN-KO-A1-2-100-4Z-P1-MaxIP	360.42			20200830-S2-GPN-KO-A1-2-100-4Z-P1-MaxIP	10	31.79	3.14564
20200830-S2-GPN-KO-A1-2-100-4Z-P5.ics	388.45			20200830-S2-GPN-KO-A1-2-100-4Z-P5.ics	15	27.08	5.53914
20200830-S2-GPN-KO-A1-2-100-4Z-P3-MaxIP	610.07			20200830-S2-GPN-KO-A1-2-100-4Z-P3-MaxIP	16	32.06	4.99064
20200830-S2-GPN-KO-A1-2-100-4Z-P4-MaxIP	448.97	435.755		20200830-S2-GPN-KO-A1-2-100-4Z-P4-MaxIP	11	29.74	3.69872	4.30507
20200830-S2-GPN-KO-A1-3-100-4Z-P3-MaxIP	430.23			20200830-S2-GPN-KO-A1-3-100-4Z-P3-MaxIP	10	31.42	3.18269
20200830-S2-GPN-KO-A1-2-100-4Z-S-MaxIP	411.01			20200830-S2-GPN-KO-A1-2-100-4Z-S-MaxIP	16	34.22	4.67563
20200830-S2-GPN-KO-A1-3-100-4Z-P-MaxIP	322.25			20200830-S2-GPN-KO-A1-3-100-4Z-P-MaxIP	15	36.12	4.15282
20200830-S2-GPN-KO-A1-3-100-4Z-P-MaxIP	313.86			20200830-S2-GPN-KO-A1-3-100-4Z-P-MaxIP	17	31.29	5.43305
20200830-S2-GPN-KO-A1-3-100-4Z-P1-MaxIP	395.71			20200830-S2-GPN-KO-A1-3-100-4Z-P1-MaxIP	11	28.5	3.85965
20200830-S2-GPN-KO-A1-3-100-4Z-P2.ics	196.56	374.612		20200830-S2-GPN-KO-A1-3-100-4Z-P2.ics	15	33.34	4.4991	4.30049
20200830-S2-GPN-KO-A1-4-100-4Z-S-MaxIP	317.76			20200830-S2-GPN-KO-A1-4-100-4Z-S-MaxIP	6	12.56	4.77707
20200830-S2-GPN-KO-A1-4-100-4Z-P-MaxIP	492.52			20200830-S2-GPN-KO-A1-4-100-4Z-P-MaxIP	32	47.41	6.74963
20200830-S2-GPN-KO-A1-4-100-4Z-P1-MaxIP	312.64			20200830-S2-GPN-KO-A1-4-100-4Z-P1-MaxIP	35	67	5.22388
20200830-S2-GPN-KO-A1-4-100-4Z-P2-MaxIP	354.8			20200830-S2-GPN-KO-A1-4-100-4Z-P2-MaxIP	10	39	2.5641
20200830-S2-GPN-KO-A1-4-100-4Z-S1-MaxIP	328.71			20200830-S2-GPN-KO-A1-4-100-4Z-S1-MaxIP	6	29.43	2.03874
20200830-S2-GPN-KO-A1-4-100-4Z-P2-MaxIP	724.12	421.758		20200830-S2-GPN-KO-A1-4-100-4Z-P2-MaxIP	4	12.18	3.28407	4.10625
20200830-S2-GPN-KO-A1-6-100-4Z-P-MaxIP	577.28			20200830-S2-GPN-KO-A1-6-100-4Z-P-MaxIP	47	62.28	7.54656
20200830-S2-GPN-KO-A1-6-100-4Z-F-MaxIP	932.61			20200830-S2-GPN-KO-A1-6-100-4Z-F-MaxIP	28	28.22	9.92204
20200830-S2-GPN-KO-A1-6-100-4Z-T-MaxIP	555.57			20200830-S2-GPN-KO-A1-6-100-4Z-T-MaxIP	17	31.06	5.47328
20200830-S2-GPN-KO-A1-6-100-4Z-S1-MaxIP	678.04			20200830-S2-GPN-KO-A1-6-100-4Z-S1-MaxIP	24	32.33	7.42345
20200830-S2-GPN-KO-A1-6-100-4Z-T1-MaxIP	582.63	665.226		20200830-S2-GPN-KO-A1-6-100-4Z-T1-MaxIP	14	31.45	4.45151	6.96337
20200830-S2-GPN-KO-A1-8-100-4Z-P-MaxIP	454.33			20200830-S2-GPN-KO-A1-8-100-4Z-P-MaxIP	22	42.8	5.14019
20200830-S2-GPN-KO-A1-8-100-4Z-S1-MaxIP	571.69	513.01		20200830-S2-GPN-KO-A1-8-100-4Z-S1-MaxIP	14	18.87	7.41918	6.27969
20200830-S2-GPN-KO-A1-9-100-4Z-P-MaxIP	281.03			20200830-S2-GPN-KO-A1-9-100-4Z-P-MaxIP	12	31.13	3.8548
20200830-S2-GPN-KO-A1-9-100-4Z-P1-MaxIP	310.63			20200830-S2-GPN-KO-A1-9-100-4Z-P1-MaxIP	7	30.42	2.30112	3.07796
20200830-S2-GPN-KO-A1-10-100-4Z-P-MaxIP	428.11	295.83		20200830-S2-GPN-KO-A1-10-100-4Z-P-MaxIP	15	30.17	4.97183
20200830-S2-GPN-KO-A1-10-100-4Z-S-MaxIP	388.31	408.21		20200830-S2-GPN-KO-A1-10-100-4Z-S-MaxIP	20	42.08	4.75285	4.86234
20200830-S2-GPN-KO-A1-11-100-4Z-S1-MaxIP	621.72			20200830-S2-GPN-KO-A1-11-100-4Z-S1-MaxIP	18	59.1	3.04569
20200830-S2-GPN-KO-A1-11-100-4Z-P-MaxIP	740.55			20200830-S2-GPN-KO-A1-11-100-4Z-P-MaxIP	10	32.38	3.08833
20200830-S2-GPN-KO-A1-11-100-4Z-P1-MaxIP	852.69			20200830-S2-GPN-KO-A1-11-100-4Z-P1-MaxIP	26	50.7	5.12821
20200830-S2-GPN-KO-A1-11-100-4Z-P2-MaxIP	791.18			20200830-S2-GPN-KO-A1-11-100-4Z-P2-MaxIP	13	36.64	3.54803
20200830-S2-GPN-KO-A1-11-100-4Z-S-MaxIP	666.58	734.544		20200830-S2-GPN-KO-A1-11-100-4Z-S-MaxIP	9	31.45	2.86169	3.53439
20200830-S2-GPN-KO-A1-13-100-4Z-P-MaxIP	544.18			20200830-S2-GPN-KO-A1-13-100-4Z-P-MaxIP	29	47.88	6.05681
20200830-S2-GPN-KO-A1-13-100-4Z-P1-MaxIP	352.53			20200830-S2-GPN-KO-A1-13-100-4Z-P1-MaxIP	6	31.33	1.9151
20200830-S2-GPN-KO-A1-13-100-4Z-P2-MaxIP	567.54	488.083		20200830-S2-GPN-KO-A1-13-100-4Z-P2-MaxIP	10	27.43	3.64564	3.87252
20200830-S3-GPN-KO-A1-2-100-4Z-P-MaxIP	376.25			20200830-S3-GPN-KO-A1-2-100-4Z-P-MaxIP	15	56.93	2.63481
20200830-S3-GPN-KO-A1-2-100-4Z-P2-MaxIP	399.45	387.85		20200830-S3-GPN-KO-A1-2-100-4Z-P2-MaxIP	9	31.57	2.85081	2.74281
GFP + Vector				GFP + Vector
20210221-GFP-V-GPN647-FLAG555-1-P-MaxIP	343.51			20210221-GFP-V-GPN647-FLAG555-1-P-MaxIP	9	31.68	2.84091
20210221-GFP-V-GPN647-FLAG555-1-P1-MaxIP	909.27			20210221-GFP-V-GPN647-FLAG555-1-P1-MaxIP	25	31.8	7.86164
20210221-GFP-V-GPN647-FLAG555-1-P2-MaxIP	931.63			20210221-GFP-V-GPN647-FLAG555-1-P2-MaxIP	26	40.67	6.39292
20210221-GFP-V-GPN647-FLAG555-1-S-MaxIP	549.58			20210221-GFP-V-GPN647-FLAG555-1-S-MaxIP	9	32.22	2.7933
20210221-GFP-V-GPN647-FLAG555-2-P-MaxIP	1246.93	796.184		20210221-GFP-V-GPN647-FLAG555-2-P-MaxIP	28	32.03	8.7418	5.72611
20210221-GFP-V-GPN647-FLAG555-2-P1-MaxIP	1057.8			20210221-GFP-V-GPN647-FLAG555-2-P1-MaxIP	21	32.48	6.46552
20210221-GFP-V-GPN647-FLAG555-2-P2-MaxIP	1007.2			20210221-GFP-V-GPN647-FLAG555-2-P2-MaxIP	67	63.67	10.523
20210221-GFP-V-GPN647-FLAG555-2-S-MaxIP	568.47			20210221-GFP-V-GPN647-FLAG555-2-S-MaxIP	16	31.44	5.08906
20210221-GFP-V-GPN647-FLAG555-2-S1-MaxIP	818.79	863.065		20210221-GFP-V-GPN647-FLAG555-2-S1-MaxIP	22	32.63	6.74226	7.20496
20210221-GFP-V-GPN647-FLAG555-3-F-MaxIP	481.25			20210221-GFP-V-GPN647-FLAG555-3-F-MaxIP	13	32.29	4.02601
20210221-GFP-V-GPN647-FLAG555-3-P-MaxIP	428.91			20210221-GFP-V-GPN647-FLAG555-3-P-MaxIP	10	32.92	3.03767
20210221-GFP-V-GPN647-FLAG555-3-P1-MaxIP	486.07			20210221-GFP-V-GPN647-FLAG555-3-P1-MaxIP	8	34.17	2.34124
20210221-GFP-V-GPN647-FLAG555-3-S-MaxIP	327.53			20210221-GFP-V-GPN647-FLAG555-3-S-MaxIP	11	37.63	2.9232
20210221-GFP-V-GPN647-FLAG555-3-S1-MaxIP	337.78			20210221-GFP-V-GPN647-FLAG555-3-S1-MaxIP	9	30.54	2.94695
20210221-GFP-V-GPN647-FLAG555-3-T-MaxIP	386.12	407.943		20210221-GFP-V-GPN647-FLAG555-3-T-MaxIP	11	32.03	3.43428	3.11823
GFP-2A-Cre + Vector				GFP-2A-Cre + Vector
20210221-CRE-V-GPN647-FLAG555-1-P-MaxIP	480.58			20210221-CRE-V-GPN647-FLAG555-1-P-MaxIP	15	31.66	4.73784
20210221-CRE-V-GPN647-FLAG555-1-S-MaxIP	508.28			20210221-CRE-V-GPN647-FLAG555-1-S-MaxIP	11	31.86	3.45261
20210221-CRE-V-GPN647-FLAG555-1-S1-MaxIP	357.64			20210221-CRE-V-GPN647-FLAG555-1-S1-MaxIP	8	32.27	2.47908
20210221-CRE-V-GPN647-FLAG555-1-P2-MaxIP	355.03	425.382		20210221-CRE-V-GPN647-FLAG555-1-P2-MaxIP	6	31.73	1.89095	3.14012
20210221-CRE-V-GPN647-FLAG555-2-S-MaxIP	742.6			20210221-CRE-V-GPN647-FLAG555-2-S-MaxIP	21	32.27	6.50759
20210221-CRE-V-GPN647-FLAG555-2-P-MaxIP	736.78	739.69		20210221-CRE-V-GPN647-FLAG555-2-P-MaxIP	9	32.31	2.78552	4.64655
20210221-CRE-V-GPN647-FLAG555-3-S-MaxIP	403.72			20210221-CRE-V-GPN647-FLAG555-3-S-MaxIP	4	33.85	1.18168
20210221-CRE-V-GPN647-FLAG555-3-P-MaxIP	267.99	335.855		20210221-CRE-V-GPN647-FLAG555-3-P-MaxIP	6	63.25	0.948617	1.06515
20210221-CRE-V-GPN647-FLAG555-4-P1-MaxIP	282.96			20210221-CRE-V-GPN647-FLAG555-4-P1-MaxIP	6	31.62	1.89753
20210221-CRE-V-GPN647-FLAG555-5-P-MaxIP	317.71	300.335		20210221-CRE-V-GPN647-FLAG555-5-P-MaxIP	12	32.21	3.72555	2.81154
20210221-CRE-V-GPN647-FLAG555-6-P-MaxIP	439.75			20210221-CRE-V-GPN647-FLAG555-6-P-MaxIP	5	32.43	1.54178
20210221-CRE-V-GPN647-FLAG555-6-S-MaxIP	468.65			20210221-CRE-V-GPN647-FLAG555-6-S-MaxIP	10	32.01	3.12402
20210221-CRE-V-GPN647-FLAG555-6-P1-MaxIP	402.83	437.077		20210221-CRE-V-GPN647-FLAG555-6-P1-MaxIP	11	69.46	1.58365	2.08315
20210221-CRE-V-GPN647-FLAG555-7-S-MaxIP	485.44			20210221-CRE-V-GPN647-FLAG555-7-S-MaxIP	5	32.3	1.54799
20210221-CRE-V-GPN647-FLAG555-7-S1-MaxIP	653.63			20210221-CRE-V-GPN647-FLAG555-7-S1-MaxIP	13	32.47	4.0037
20210221-CRE-V-GPN647-FLAG555-7-P-MaxIP	433.44	524.17		20210221-CRE-V-GPN647-FLAG555-7-P-MaxIP	4	32.78	1.22026	2.25731
20210221-CRE-V-GPN647-FLAG555-8-P-MaxIP	419.64			20210221-CRE-V-GPN647-FLAG555-8-P-MaxIP	12	33.68	3.56295
20210221-CRE-V-GPN647-FLAG555-8-S-MaxIP	388.08			20210221-CRE-V-GPN647-FLAG555-8-S-MaxIP	9	31.66	2.8427
20210221-CRE-V-GPN647-FLAG555-8-S1-MaxIP	362.22			20210221-CRE-V-GPN647-FLAG555-8-S1-MaxIP	17	34.3	4.95627
20210221-CRE-V-GPN647-FLAG555-8-S2-MaxIP	343.7			20210221-CRE-V-GPN647-FLAG555-8-S2-MaxIP	6	34.72	1.72811
20210221-CRE-V-GPN647-FLAG555-8-S3-MaxIP	527.64			20210221-CRE-V-GPN647-FLAG555-8-S3-MaxIP	32	68.71	4.65726
20210221-CRE-V-GPN647-FLAG555-8-P1-MaxIP	475.55	464.417		20210221-CRE-V-GPN647-FLAG555-8-P1-MaxIP	9	31.82	2.82841	3.42928
20210221-CRE-V-GPN647-FLAG555-9-S-MaxIP	689.31			20210221-CRE-V-GPN647-FLAG555-9-S-MaxIP	18	49.29	3.65186
20210221-CRE-V-GPN647-FLAG555-9-P-MaxIP	595.37	642.34		20210221-CRE-V-GPN647-FLAG555-9-P-MaxIP	16	31.9	5.01567	4.33377
20210221-CRE-V-GPN647-FLAG555-10-P-MaxIP	392.51			20210221-CRE-V-GPN647-FLAG555-10-P-MaxIP	9	34.44	2.61324
20210221-CRE-V-GPN647-FLAG555-10-S-MaxIP	298.99			20210221-CRE-V-GPN647-FLAG555-10-S-MaxIP	5	32.59	1.53421
20210221-CRE-V-GPN647-FLAG555-10-P1-MaxIP	372.67	354.723		20210221-CRE-V-GPN647-FLAG555-10-P1-MaxIP	8	33.83	2.36477	2.17074
20210221-CRE-V-GPN647-FLAG555-11-P-MaxIP	290.99			20210221-CRE-V-GPN647-FLAG555-11-P-MaxIP	9	31.74	2.83554
20210221-CRE-V-GPN647-FLAG555-11-S-MaxIP	450.19			20210221-CRE-V-GPN647-FLAG555-11-S-MaxIP	14	56.83	2.46349
20210221-CRE-V-GPN647-FLAG555-11-S2-MaxIP	314.75			20210221-CRE-V-GPN647-FLAG555-11-S2-MaxIP	7	32.04	2.18477
20210221-CRE-V-GPN647-FLAG555-11-ST-MaxIP	275.51			20210221-CRE-V-GPN647-FLAG555-11-ST-MaxIP	4	31.3	1.27796
20210221-CRE-V-GPN647-FLAG555-11-P1-MaxIP	273.9			20210221-CRE-V-GPN647-FLAG555-11-P1-MaxIP	5	31.39	1.59286
20210221-CRE-V-GPN647-FLAG555-11-P2-MaxIP	296.23	351.702		20210221-CRE-V-GPN647-FLAG555-11-P2-MaxIP	7	31.62	2.21379	2.09473
20210221-CRE-V-GPN647-FLAG555-12-P-MaxIP	598.12			20210221-CRE-V-GPN647-FLAG555-12-P-MaxIP	11	33.18	3.31525
20210221-CRE-V-GPN647-FLAG555-13-P-MaxIP	413.13			20210221-CRE-V-GPN647-FLAG555-13-P-MaxIP	9	33.95	2.65096
20210221-CRE-V-GPN647-FLAG555-13-P1-MaxIP	414.72	413.925		20210221-CRE-V-GPN647-FLAG555-13-P1-MaxIP	8	31.8	2.51572	2.82731
20210221-CRE-V-GPN647-FLAG555-14-S-MaxIP	332.65			20210221-CRE-V-GPN647-FLAG555-14-S-MaxIP	12	31.63	3.79387
20210221-CRE-V-GPN647-FLAG555-14-S1-MaxIP	593.67			20210221-CRE-V-GPN647-FLAG555-14-S1-MaxIP	16	31.89	5.01725
20210221-CRE-V-GPN647-FLAG555-14-S2-MaxIP	352.38			20210221-CRE-V-GPN647-FLAG555-14-S2-MaxIP	5	31.69	1.57778
20210221-CRE-V-GPN647-FLAG555-14-P1-MaxIP	240.55	379.812		20210221-CRE-V-GPN647-FLAG555-14-P1-MaxIP	7	50.62	1.38285	2.94294
GFP-2A-Cre + EndoA1				GFP-2A-Cre + EndoA1
20210221-CRE-A1-GPN647-FLAG555-1-P1-MaxIP	526.98			20210221-CRE-A1-GPN647-FLAG555-1-P1-MaxIP	14	32.06	4.36681
20210221-CRE-A1-GPN647-FLAG555-1-S-MaxIP	570.27			20210221-CRE-A1-GPN647-FLAG555-1-S-MaxIP	14	32.2	4.34783
20210221-CRE-A1-GPN647-FLAG555-1-S1-MaxIP	562.76			20210221-CRE-A1-GPN647-FLAG555-1-S1-MaxIP	11	31.83	3.45586
20210221-CRE-A1-GPN647-FLAG555-1-T-MaxIP	470.05	527.816		20210221-CRE-A1-GPN647-FLAG555-1-T-MaxIP	14	38.3	3.65535	4.05576
20210221-CRE-A1-GPN647-FLAG555-2-P-MaxIP	445.86			20210221-CRE-A1-GPN647-FLAG555-2-P-MaxIP	15	50.57	2.96619
20210221-CRE-A1-GPN647-FLAG555-2-S1-MaxIP	510.77			20210221-CRE-A1-GPN647-FLAG555-2-S1-MaxIP	4	32.62	1.22624
20210221-CRE-A1-GPN647-FLAG555-2-T-MaxIP	442.22			20210221-CRE-A1-GPN647-FLAG555-2-T-MaxIP	21	32.12	6.53798
20210221-CRE-A1-GPN647-FLAG555-2-P1-MaxIP	582.46			20210221-CRE-A1-GPN647-FLAG555-2-P1-MaxIP	21	32.49	6.46353
20210221-CRE-A1-GPN647-FLAG555-2-S-MaxIP	738.47	543.956		20210221-CRE-A1-GPN647-FLAG555-2-S-MaxIP	25	32.36	7.72559	5.48833
20210221-CRE-A1-GPN647-FLAG555-3-P-MaxIP	630.85			20210221-CRE-A1-GPN647-FLAG555-3-P-MaxIP	32	55.53	5.76265
20210221-CRE-A1-GPN647-FLAG555-3-P1-MaxIP	430.14			20210221-CRE-A1-GPN647-FLAG555-3-P1-MaxIP	24	32.72	7.33496
20210221-CRE-A1-GPN647-FLAG555-3-S-MaxIP	464.74			20210221-CRE-A1-GPN647-FLAG555-3-S-MaxIP	15	31.15	4.81541
20210221-CRE-A1-GPN647-FLAG555-3-S1-MaxIP	501.76	506.873		20210221-CRE-A1-GPN647-FLAG555-3-S1-MaxIP	16	32.08	4.98753	5.72514
20210221-CRE-A1-GPN647-FLAG555-4-P1-MaxIP	464.82			20210221-CRE-A1-GPN647-FLAG555-4-P1-MaxIP	27	47.71	5.65919
20210221-CRE-A1-GPN647-FLAG555-4-P2-MaxIP	503.47			20210221-CRE-A1-GPN647-FLAG555-4-P2-MaxIP	34	43.91	7.74311
20210221-CRE-A1-GPN647-FLAG555-4-S-MaxIP	639.63			20210221-CRE-A1-GPN647-FLAG555-4-S-MaxIP	20	31.81	6.28733
20210221-CRE-A1-GPN647-FLAG555-4-T-MaxIP	401.75	502.418		20210221-CRE-A1-GPN647-FLAG555-4-T-MaxIP	27	50.38	5.35927	6.26223
20210221-CRE-A1-GPN647-FLAG555-5-P-MaxIP	445.49			20210221-CRE-A1-GPN647-FLAG555-5-P-MaxIP	21	31.98	6.5666
20210221-CRE-A1-GPN647-FLAG555-5-P1-MaxIP	462.15			20210221-CRE-A1-GPN647-FLAG555-5-P1-MaxIP	16	32.18	4.97203
20210221-CRE-A1-GPN647-FLAG555-5-S-MaxIP	556.6			20210221-CRE-A1-GPN647-FLAG555-5-S-MaxIP	35	33.78	10.3612
20210221-CRE-A1-GPN647-FLAG555-5-S1-MaxIP	451.67			20210221-CRE-A1-GPN647-FLAG555-5-S1-MaxIP	22	31.54	6.97527
20210221-CRE-A1-GPN647-FLAG555-5-T-MaxIP	396.13	462.408		20210221-CRE-A1-GPN647-FLAG555-5-T-MaxIP	21	31.27	6.7157	7.11815
20210221-CRE-A1-GPN647-FLAG555-6-P-MaxIP	695.53			20210221-CRE-A1-GPN647-FLAG555-6-P-MaxIP	12	33.34	3.59928
20210221-CRE-A1-GPN647-FLAG555-6-P1-MaxIP	517.43			20210221-CRE-A1-GPN647-FLAG555-6-P1-MaxIP	17	62.93	2.70141
20210221-CRE-A1-GPN647-FLAG555-6-S-MaxIP	470.08			20210221-CRE-A1-GPN647-FLAG555-6-S-MaxIP	12	34.41	3.48736	3.26268
20210221-CRE-A1-GPN647-FLAG555-7-P-MaxIP	358.84			20210221-CRE-A1-GPN647-FLAG555-7-P-MaxIP	12	26.89	4.46263
20210221-CRE-A1-GPN647-FLAG555-7-P1-MaxIP	388.9	373.87		20210221-CRE-A1-GPN647-FLAG555-7-P1-MaxIP	5	33.41	1.49656	2.97959
20210221-CRE-A1-GPN647-FLAG555-8-F-MaxIP	732.06			20210221-CRE-A1-GPN647-FLAG555-8-F-MaxIP	15	31.93	4.69778
20210221-CRE-A1-GPN647-FLAG555-8-P-MaxIP	618.51			20210221-CRE-A1-GPN647-FLAG555-8-P-MaxIP	28	33.57	8.34078
20210221-CRE-A1-GPN647-FLAG555-8-P1-MaxIP	699.06			20210221-CRE-A1-GPN647-FLAG555-8-P1-MaxIP	18	31.53	5.70885
20210221-CRE-A1-GPN647-FLAG555-8-S-MaxIP	706.36			20210221-CRE-A1-GPN647-FLAG555-8-S-MaxIP	19	33.04	5.75061
20210221-CRE-A1-GPN647-FLAG555-8-S2-MaxIP	510.05			20210221-CRE-A1-GPN647-FLAG555-8-S2-MaxIP	21	36.42	5.76606
20210221-CRE-A1-GPN647-FLAG555-8-T-MaxIP	649.82			20210221-CRE-A1-GPN647-FLAG555-8-T-MaxIP	22	33.05	6.65658
20210221-CRE-A1-GPN647-FLAG555-8-T1-MaxIP	594.48	644.334		20210221-CRE-A1-GPN647-FLAG555-8-T1-MaxIP	34	50.53	6.72868	6.23562
20210221-CRE-A1-GPN647-FLAG555-9-P-MaxIP	652.51			20210221-CRE-A1-GPN647-FLAG555-9-P-MaxIP	20	32.77	6.10314
20210221-CRE-A1-GPN647-FLAG555-9-S-MaxIP	668.55			20210221-CRE-A1-GPN647-FLAG555-9-S-MaxIP	15	32.35	4.63679
20210221-CRE-A1-GPN647-FLAG555-9-T-MaxIP	601.25	640.77		20210221-CRE-A1-GPN647-FLAG555-9-T-MaxIP	13	31.58	4.11653	4.95215
20210221-CRE-A1-GPN647-FLAG555-10-P-MaxIP	578.62			20210221-CRE-A1-GPN647-FLAG555-10-P-MaxIP	33	35.29	9.35109
20210221-CRE-A1-GPN647-FLAG555-10-P1-MaxIP	615.9			20210221-CRE-A1-GPN647-FLAG555-10-P1-MaxIP	52	60.21	8.63644
20210221-CRE-A1-GPN647-FLAG555-10-S-MaxIP	658.24	617.587		20210221-CRE-A1-GPN647-FLAG555-10-S-MaxIP	17	26.21	6.48607	8.15787
20210221-CRE-A1-GPN647-FLAG555-19-S-MaxIP	436.18			20210221-CRE-A1-GPN647-FLAG555-19-S-MaxIP	13	32.87	3.95497
20210221-CRE-A1-GPN647-FLAG555-19-P2-MaxIP	461.92			20210221-CRE-A1-GPN647-FLAG555-19-P2-MaxIP	13	32.43	4.00863
20210221-CRE-A1-GPN647-FLAG555-19-P1-MaxIP	401.91	433.337		20210221-CRE-A1-GPN647-FLAG555-19-P1-MaxIP	18	32.52	5.53506	4.49955
20210221-CRE-A1-GPN647-FLAG555-18-S1-MaxIP	498.63			20210221-CRE-A1-GPN647-FLAG555-18-S1-MaxIP	13	30.75	4.22764
20210221-CRE-A1-GPN647-FLAG555-18-S-MaxIP	352.38			20210221-CRE-A1-GPN647-FLAG555-18-S-MaxIP	16	31.36	5.10204
20210221-CRE-A1-GPN647-FLAG555-18-P1-MaxIP	386.1			20210221-CRE-A1-GPN647-FLAG555-18-P1-MaxIP	17	32.11	5.2943
20210221-CRE-A1-GPN647-FLAG555-18-P-MaxIP	417.35	413.615		20210221-CRE-A1-GPN647-FLAG555-18-P-MaxIP	12	38.75	3.09677	4.43019
20210221-CRE-A1-GPN647-FLAG555-17-P1-MaxIP	561.1			20210221-CRE-A1-GPN647-FLAG555-17-P1-MaxIP	18	32.13	5.60224
20210221-CRE-A1-GPN647-FLAG555-17-P-MaxIP	737.61			20210221-CRE-A1-GPN647-FLAG555-17-P-MaxIP	35	45.43	7.70416	6.6532
20210221-CRE-A1-GPN647-FLAG555-16-T-MaxIP	565.88			20210221-CRE-A1-GPN647-FLAG555-16-T-MaxIP	12	31.91	3.76058
20210221-CRE-A1-GPN647-FLAG555-16-S1-MaxIP	617.83			20210221-CRE-A1-GPN647-FLAG555-16-S1-MaxIP	21	34.92	6.01375
20210221-CRE-A1-GPN647-FLAG555-16-p-MaxIP	433.69			20210221-CRE-A1-GPN647-FLAG555-16-p-MaxIP	17	31.31	5.42958
20210221-CRE-A1-GPN647-FLAG555-16-S-MaxIP	552.28			20210221-CRE-A1-GPN647-FLAG555-16-S-MaxIP	12	32.63	3.6776
20210221-CRE-A1-GPN647-FLAG555-16-p2-MaxIP	458.81			20210221-CRE-A1-GPN647-FLAG555-16-p2-MaxIP	21	33.62	6.24628
20210221-CRE-A1-GPN647-FLAG555-16-p1-MaxIP	548.76			20210221-CRE-A1-GPN647-FLAG555-16-p1-MaxIP	17	39.36	4.31911
20210221-CRE-A1-GPN647-FLAG555-16-p-MaxIP	417.81	513.58		20210221-CRE-A1-GPN647-FLAG555-16-p-MaxIP	17	29.07	5.84795	5.04212
20210221-CRE-A1-GPN647-FLAG555-14-F-MaxIP	775.88			20210221-CRE-A1-GPN647-FLAG555-14-F-MaxIP	11	31.8	3.45912
20210221-CRE-A1-GPN647-FLAG555-14-S1-MaxIP	830.08			20210221-CRE-A1-GPN647-FLAG555-14-S1-MaxIP	15	31.61	4.74533
20210221-CRE-A1-GPN647-FLAG555-14-S-MaxIP	828.26			20210221-CRE-A1-GPN647-FLAG555-14-S-MaxIP	22	32.18	6.83654
20210221-CRE-A1-GPN647-FLAG555-14-P1-MaxIP	580.06			20210221-CRE-A1-GPN647-FLAG555-14-P1-MaxIP	13	32.56	3.99263
20210221-CRE-A1-GPN647-FLAG555-14-P-MaxIP	613.36	725.528		20210221-CRE-A1-GPN647-FLAG555-14-P-MaxIP	18	32.05	5.61622	4.92997
20210221-CRE-A1-GPN647-FLAG555-13-T-MaxIP	541.49			20210221-CRE-A1-GPN647-FLAG555-13-T-MaxIP	7	32.24	2.17122
20210221-CRE-A1-GPN647-FLAG555-13-S-MaxIP	571.34	556.415		20210221-CRE-A1-GPN647-FLAG555-13-S-MaxIP	9	32.26	2.78983	2.48052
20210221-CRE-A1-GPN647-FLAG555-12-S-MaxIP	479.19			20210221-CRE-A1-GPN647-FLAG555-12-S-MaxIP	26	77	3.37662
20210221-CRE-A1-GPN647-FLAG555-12-P1-MaxIP	424.53			20210221-CRE-A1-GPN647-FLAG555-12-P1-MaxIP	8	31.94	2.5047
20210221-CRE-A1-GPN647-FLAG555-12-P-MaxIP	590.94	498.22		20210221-CRE-A1-GPN647-FLAG555-12-P-MaxIP	13	32.24	4.03226	3.30453
20210221-CRE-A1-GPN647-FLAG555-11-F-MaxIP	489.14			20210221-CRE-A1-GPN647-FLAG555-11-F-MaxIP	14	36.14	3.87382
20210221-CRE-A1-GPN647-FLAG555-11-T-MaxIP	808.21			20210221-CRE-A1-GPN647-FLAG555-11-T-MaxIP	18	31.14	5.78035
20210221-CRE-A1-GPN647-FLAG555-11-P1-MaxIP	680.88			20210221-CRE-A1-GPN647-FLAG555-11-P1-MaxIP	57	63.98	8.90903
20210221-CRE-A1-GPN647-FLAG555-11-S-MaxIP	699.17			20210221-CRE-A1-GPN647-FLAG555-11-S-MaxIP	20	31.52	6.34518
20210221-CRE-A1-GPN647-FLAG555-15-F-MaxIP	360.38	607.556		20210221-CRE-A1-GPN647-FLAG555-15-F-MaxIP	4	35.29	1.13347	5.20837
GFP + Vector				GFP + Vector
MAX_4-S-1.nd2:0002-0512-0556	746.681			MAX_4-S-1.nd2	22	32.663	6.73545
MAX_4-P-1.nd2:0002-0512-0582	668.174	707.428		MAX_4-P-1.nd2	37	38.499	9.61064	8.17304
MAX_3-T-1.nd2:0002-0512-0646	566.352			MAX_3-T-1.nd2	31	31.484	9.84627
MAX_3-S-1.nd2:0002-0512-0756	606.849			MAX_3-S-1.nd2	32	38.259	8.36405
MAX_3-P-1.nd2:0002-0512-0671	575.526			MAX_3-P-1.nd2	48	32.028	14.9869
MAX_3-F-1.nd2:0002-0512-0724	450.777	549.876		MAX_3-F-1.nd2	10	31.768	3.14782	9.08626
MAX_2-T-1.nd2:0002-0545-0388	556.21			MAX_2-T-1.nd2	25	49.828	5.01726
MAX_2-S-1.nd2:0002-0512-0530	1067.72			MAX_2-S-1.nd2	27	31.445	8.58642
MAX_2-P-1.nd2:0002-0512-0576	1193.63			MAX_2-P-1.nd2	43	30.367	14.1601
MAX_2-F-1.nd2:0002-0512-0593	876.821	923.594		MAX_2-F-1.nd2	24	31.532	7.61132	8.84378
MAX_1-T-1.nd2:0002-0662-0512	570.976			MAX_1-T-1.nd2	15	30.997	4.83918
MAX_1-S-1.nd2:0002-0547-0512	668.518			MAX_1-S-1.nd2	32	31.213	10.2521
MAX_1-p-1.nd2:0002-0562-0430	604.099	614.531		MAX_1-p-1.nd2	25	32.546	7.68144	7.59092
GFP + Vector				GFP + Vector
20210129-V-V-GPN647-flag555=GFP488-3-P-MaxIP	663.03			20210129-V-V-GPN647-flag555=GFP488-3-P-MaxIP	33	63.99	5.15706
20210129-V-V-GPN647-flag555=GFP488-3-T-MaxIP	795.81			20210129-V-V-GPN647-flag555=GFP488-3-T-MaxIP	15	32.51	4.61396
20210129-V-V-GPN647-flag555=GFP488-3-S-MaxIP	652.35	724.08		20210129-V-V-GPN647-flag555=GFP488-3-S-MaxIP	19	30.7	6.18893
20210129-V-V-GPN647-flag555=GFP488-5-P-MaxIP 1	783.79	783.79		20210129-V-V-GPN647-flag555=GFP488-5-P-MaxIP 1	12	31.81	3.7724
20210129-V-V-GPN647-flag555=GFP488-7-P-MaxIP	648.85			20210129-V-V-GPN647-flag555=GFP488-7-P-MaxIP	16	47.1	3.39703
20210129-V-V-GPN647-flag555=GFP488-7-S-MaxIP	726.45			20210129-V-V-GPN647-flag555=GFP488-7-S-MaxIP	10	28.97	3.45185
20210129-V-V-GPN647-flag555=GFP488-7-S1-MaxIP	569.19			20210129-V-V-GPN647-flag555=GFP488-7-S1-MaxIP	9	32.43	2.77521
20210129-V-V-GPN647-flag555=GFP488-7-P1-MaxIP	773.67	679.54		20210129-V-V-GPN647-flag555=GFP488-7-P1-MaxIP	18	31.12	5.78406
20210129-V-V-GPN647-flag555=GFP488-1-P1-MaxIP	657.29			20210129-V-V-GPN647-flag555=GFP488-1-P1-MaxIP	19	33.73	5.63297
20210129-V-V-GPN647-flag555=GFP488-1-T-MaxIP	765.93			20210129-V-V-GPN647-flag555=GFP488-1-T-MaxIP	12	33.77	3.55345
20210129-V-V-GPN647-flag555=GFP488-1-P2-MaxIP	781.04			20210129-V-V-GPN647-flag555=GFP488-1-P2-MaxIP	6	32.39	1.85242
20210129-V-V-GPN647-flag555=GFP488-1-P3-MaxIP	894.96	774.805		20210129-V-V-GPN647-flag555=GFP488-1-P3-MaxIP	24	32.17	7.46037
20210129-V-V-GPN647-flag555=GFP488-2-P-MaxIP	608.24			20210129-V-V-GPN647-flag555=GFP488-2-P-MaxIP	28	63.36	4.41919
20210129-V-V-GPN647-flag555=GFP488-2-P1-MaxIP	497.39	552.815		20210129-V-V-GPN647-flag555=GFP488-2-P1-MaxIP	12	32.02	3.74766
20210129-V-V-GPN647-flag555=GFP488-4-P-MaxIP	881.61			20210129-V-V-GPN647-flag555=GFP488-4-P-MaxIP	24	31.84	7.53769
20210129-V-V-GPN647-flag555=GFP488-4-S-MaxIP	740.65			20210129-V-V-GPN647-flag555=GFP488-4-S-MaxIP	18	33.43	5.38439
20210129-V-V-GPN647-flag555=GFP488-4-T-MaxIP	755.21	792.49		20210129-V-V-GPN647-flag555=GFP488-4-T-MaxIP	13	37.98	3.42285
20210129-V-V-GPN647-flag555=GFP488-6-F-MaxIP	666.34	666.34		20210129-V-V-GPN647-flag555=GFP488-6-F-MaxIP	12	34.66	3.4622
GFP-2A-Cre + Vector				GFP-2A-Cre + Vector
20210129-CRE-V-GPN647-flag555=GFP488-1-P-MaxIP	550.99			20210129-CRE-V-GPN647-flag555=GFP488-1-P-MaxIP	6	32.65	1.83767
20210129-CRE-V-GPN647-flag555=GFP488-1-P-MaxIP	550.99			20210129-CRE-V-GPN647-flag555=GFP488-1-P-MaxIP	6	32.65	1.83767
20210129-CRE-V-GPN647-flag555=GFP488-1-S-MaxIP	627.43			20210129-CRE-V-GPN647-flag555=GFP488-1-S-MaxIP	7	32.1	2.18069
20210129-CRE-V-GPN647-flag555=GFP488-1-P-MaxIP	550.99	570.1		20210129-CRE-V-GPN647-flag555=GFP488-1-P-MaxIP	6	32.65	1.83767
20210129-CRE-V-GPN647-flag555=GFP488-2-S-MaxIP	286.01			20210129-CRE-V-GPN647-flag555=GFP488-2-S-MaxIP	3	31.72	0.945776
20210129-CRE-V-GPN647-flag555=GFP488-2-F-MaxIP	309.97			20210129-CRE-V-GPN647-flag555=GFP488-2-F-MaxIP	7	32.02	2.18613
20210129-CRE-V-GPN647-flag555=GFP488-2-T-MaxIP	280.35			20210129-CRE-V-GPN647-flag555=GFP488-2-T-MaxIP	3	31.55	0.950872
20210129-CRE-V-GPN647-flag555=GFP488-2-p-MaxIP	304.96			20210129-CRE-V-GPN647-flag555=GFP488-2-p-MaxIP	4	36.07	1.10895
20210129-CRE-V-GPN647-flag555=GFP488-2-P1-MaxIP	350.54	306.366		20210129-CRE-V-GPN647-flag555=GFP488-2-P1-MaxIP	6	32.08	1.87032
20210129-CRE-V-GPN647-flag555=GFP488-3-P-MaxIP	597.53			20210129-CRE-V-GPN647-flag555=GFP488-3-P-MaxIP	9	38.29	2.35048
20210129-CRE-V-GPN647-flag555=GFP488-3-S-MaxIP	459.1			20210129-CRE-V-GPN647-flag555=GFP488-3-S-MaxIP	8	50.34	1.58919
20210129-CRE-V-GPN647-flag555=GFP488-3-S1-MaxIP	467.91			20210129-CRE-V-GPN647-flag555=GFP488-3-S1-MaxIP	5	31.8	1.57233
20210129-CRE-V-GPN647-flag555=GFP488-3-S2-MaxIP	468.88			20210129-CRE-V-GPN647-flag555=GFP488-3-S2-MaxIP	6	31.67	1.89454
20210129-CRE-V-GPN647-flag555=GFP488-3-F-MaxIP	393.51			20210129-CRE-V-GPN647-flag555=GFP488-3-F-MaxIP	4	31.51	1.26944
20210129-CRE-V-GPN647-flag555=GFP488-3-T-MaxIP	310.87			20210129-CRE-V-GPN647-flag555=GFP488-3-T-MaxIP	3	33.08	0.906892
20210129-CRE-V-GPN647-flag555=GFP488-3-P1-MaxIP	381.63			20210129-CRE-V-GPN647-flag555=GFP488-3-P1-MaxIP	7	31.93	2.1923
20210129-CRE-V-GPN647-flag555=GFP488-3-P2-MaxIP	387.94	433.421		20210129-CRE-V-GPN647-flag555=GFP488-3-P2-MaxIP	8	31.63	2.52924
20210129-CRE-V-GPN647-flag555=GFP488-4-T-MaxIP	262.03			20210129-CRE-V-GPN647-flag555=GFP488-4-T-MaxIP	6	57.16	1.04969
20210129-CRE-V-GPN647-flag555=GFP488-4-S-MaxIP	275.05			20210129-CRE-V-GPN647-flag555=GFP488-4-S-MaxIP	3	31.59	0.949668
20210129-CRE-V-GPN647-flag555=GFP488-4-P-MaxIP	410.5	315.86		20210129-CRE-V-GPN647-flag555=GFP488-4-P-MaxIP	4	32.35	1.23648
20210129-CRE-V-GPN647-flag555=GFP488-5-P-MaxIP	351.34			20210129-CRE-V-GPN647-flag555=GFP488-5-P-MaxIP	3	33.85	0.886263
20210129-CRE-V-GPN647-flag555=GFP488-5-P1-MaxIP	256.5	303.92		20210129-CRE-V-GPN647-flag555=GFP488-5-P1-MaxIP	5	32.54	1.53657
20210129-CRE-V-GPN647-flag555=GFP488-6-P-MaxIP	447.12			20210129-CRE-V-GPN647-flag555=GFP488-6-P-MaxIP	6	32.48	1.84729
20210129-CRE-V-GPN647-flag555=GFP488-6-P1-MaxIP	257.77	352.445		20210129-CRE-V-GPN647-flag555=GFP488-6-P1-MaxIP	4	32.55	1.22888
20210129-CRE-V-GPN647-flag555=GFP488-8-P-MaxIP	570.54			20210129-CRE-V-GPN647-flag555=GFP488-8-P-MaxIP	5	31.55	1.58479
20210129-CRE-V-GPN647-flag555=GFP488-8-P1-MaxIP	337.08	453.81		20210129-CRE-V-GPN647-flag555=GFP488-8-P1-MaxIP	8	32.3	2.47678
20210129-CRE-V-GPN647-flag555=GFP488-7-P1-MaxIP	544.22			20210129-CRE-V-GPN647-flag555=GFP488-7-P1-MaxIP	8	32.09	2.49299
20210129-CRE-V-GPN647-flag555=GFP488-7-S-MaxIP	715.75			20210129-CRE-V-GPN647-flag555=GFP488-7-S-MaxIP	17	31.61	5.37804
20210129-CRE-V-GPN647-flag555=GFP488-7-F-MaxIP	995.22			20210129-CRE-V-GPN647-flag555=GFP488-7-F-MaxIP	21	32.73	6.41613
20210129-CRE-V-GPN647-flag555=GFP488-7-T-MaxIP	760.25			20210129-CRE-V-GPN647-flag555=GFP488-7-T-MaxIP	15	33.08	4.53446
20210129-CRE-V-GPN647-flag555=GFP488-7-T1-MaxIP	608.38	724.764		20210129-CRE-V-GPN647-flag555=GFP488-7-T1-MaxIP	5	32.14	1.55569

## Sheet: Fig 5K Normalize
													mean intensity																			number
22.12.05	GFP_Vector	GFP-2A-Cre + Vector	GFP-2A-Cre + EndoA1	GFP-2A-Cre + △SH3	GFP-2A-Cre + aa172-352	Average	GFP_Vector	GFP-2A-Cre + Vector	GFP-2A-Cre + EndoA1	GFP-2A-Cre + △SH3	GFP-2A-Cre + aa172-352		GFP_Vector	GFP-2A-Cre + Vector	GFP-2A-Cre + EndoA1	GFP-2A-Cre + △SH3	GFP-2A-Cre + aa172-352			GFP_Vector	GFP-2A-Cre + Vector	GFP-2A-Cre + EndoA1	GFP-2A-Cre + △SH3	GFP-2A-Cre + aa172-352	Average	GFP_Vector	GFP-2A-Cre + Vector	GFP-2A-Cre + EndoA1	GFP-2A-Cre + △SH3	GFP-2A-Cre + aa172-352		GFP_Vector	GFP-2A-Cre + Vector	GFP-2A-Cre + EndoA1	GFP-2A-Cre + △SH3	GFP-2A-Cre + aa172-352
	802.849	445.972	671.668	578.505	498.544	572.871	1.40145	0.778486	1.17246	1.00983	0.870255		1.1211	0.7681	1.17246	1.00983	0.870255			14.9484	11.2932	13.5047	10.94	4.30878	11.7977	1.26707	0.957243	1.1447	0.927303	0.365223		1.16064	0.819719	1.08248	0.927303	0.365223
	642.245	440.022	602.333	435.931	479.727	572.871	1.1211	0.7681	1.05143	0.760958	0.837408		1.09316	0.73434	1.05143	0.760958	0.837408			13.6928	9.67077	13.4613	6.57132	4.07116	11.7977	1.16064	0.819719	1.14101	0.557001	0.345081		1.06717	0.710614	0.880798	0.557001	0.345081
	635.835	429.502	540.149	413.278	372.567	572.871	1.10991	0.749736	0.942881	0.721416	0.650351		0.91664	0.673912	0.942881	0.721416	0.650351			12.7446	9.4714	12.7707	5.68567	3.58968	11.7977	1.08026	0.802819	1.08248	0.481931	0.30427		0.944654	0.605155	0.856697	0.481931	0.30427
	626.241	420.682	531.45	375.813	369.474	572.871	1.09316	0.73434	0.927695	0.656016	0.64495		1.17614	1.04598	0.927695	0.656016	0.64495			12.5901	8.38359	10.3914	4.19412	3.25978	11.7977	1.06717	0.710614	0.880798	0.355504	0.276307		0.64089	1.20992	0.839203	0.355504	0.276307
	546.862	419.454	495.706	309.444	351.704	572.871	0.954599	0.732197	0.865301	0.540163	0.613932		1.08059	0.941638	0.865301	0.540163	0.613932			12.4337	8.30296	10.107	4.02045	3.0966	11.7977	1.05391	0.70378	0.856697	0.340783	0.262476		1.41537	0.888067	0.657472	0.340783	0.262476
	525.116	386.065	490.223	275.111	270.175	572.871	0.91664	0.673912	0.85573	0.480233	0.471616		1.05241	0.907622	0.85573	0.480233	0.471616			11.1447	7.13942	9.90065	3.66836	2.8768	11.7977	0.944654	0.605155	0.839203	0.310939	0.243845		1.32785	0.85315	0.642348	0.310939	0.243845
	470.717	342.764	479.44	273.791	266.876	572.871	0.76945	0.598326	0.836908	0.477928	0.465857		1.00163	0.824279	0.836908	0.477928	0.465857			9.26605	4.43491	7.75664	1.63932	3.66511	11.7977	0.785414	0.375914	0.657472	0.138953	0.310664		1.1629	0.727939	0.539906	0.138953	0.310664
	465.178		435.241	206.062		572.871	1		0.759754	0.3597			0.923168	0.787225	0.759754	0.3597	0.726962			7.56101		7.57821	1.46906		11.7977	0.64089		0.642348	0.124521			1.07852	0.5587	1.30645	0.124521	0.551691
	440.796		431.456	198.351		572.871			0.753147	0.346241			0.891604	0.822184	1.67439	0.346241	0.482906			11.7977		6.36964			11.7977			0.539906				0.937412		1.12891	1.16222	0.47415
	572.871		408.377			572.871			0.71286				0.694856	0.809185	1.31405	1.32657	0.449999			11.7977		5.09723			11.7977			0.432054				0.852445	1.07752	1.04989	1.04265	0.501859
						572.871							1.22576	0.782945	1.03804	1.23509	0.73441								11.7977							0.794034	1.04657	1.19638	0.812871	0.361039
						572.871							1.17433	0.708264	0.993458	0.919678	0.734399								11.7977							0.689421	1.02518	1.19511	0.809725	0.314245
						572.871							0.957779	0.650482	0.912296	0.811709	0.59841								11.7977							1.36389	0.77871	1.14113	0.804631	0.556293
													0.937073	0.563006	1.48409	0.790536	0.638252								11.7977							1.15382	0.532767	1.03026	0.341384	0.750561
	GFP_Vector	GFP-2A-Cre + Vector	GFP-2A-Cre + EndoA1	GFP-2A-Cre + △SH3	GFP-2A-Cre + aa172-352	Average	GFP_Vector	GFP-2A-Cre + Vector	GFP-2A-Cre + EndoA1	GFP-2A-Cre + △SH3	GFP-2A-Cre + aa172-352		0.827745	0.543072	1.14451	0.671465	0.735634			GFP_Vector	GFP-2A-Cre + Vector	GFP-2A-Cre + EndoA1	GFP-2A-Cre + △SH3	GFP-2A-Cre + aa172-352	GFP_Vector	GFP-2A-Cre + Vector	GFP-2A-Cre + EndoA1	GFP-2A-Cre + △SH3	GFP-2A-Cre + aa172-352	Average		0.958326	0.448015	0.982211	0.512183	0.770684
23.03.07	536.894	465.492	701.798	556.013		419.136	1.28095	1.1106	1.67439	1.32657			1.46552	1.07347	1.0889	1.00295	0.852633			7.23595	6.99054	8.90398	5.94175		5.11241	1.41537	1.36737	1.74164	1.16222			0.722592	0.868553	0.855369	0.432339	0.727823
	492.962	438.408	557.388	517.67		419.136	1.17614	1.04598	1.32985	1.23509			1.13016	0.760698	1.07837	0.755508	0.86216			6.78853	6.1856	7.0821	5.33046		5.11241	1.32785	1.20992	1.38528	1.04265			0.374225	0.641015	1.33055	0.405471	0.851542
	467.06	411.547	550.765	385.47		419.136	1.11434	0.981894	1.31405	0.919678			1.05965	0.634305	0.972153	0.74783	1.00583			6.09547	4.90131	6.9775	4.15573		5.11241	1.19229	0.958708	1.36482	0.812871			1.58831	0.550106	1.24364	0.50644	0.571016
	452.913	394.674	519.967	340.216		419.136	1.08059	0.941638	1.24057	0.811709			1.02878	0.600706	0.940927	0.692542	0.680981			5.94523	4.54017	6.67913	4.13965		5.11241	1.1629	0.888067	1.30645	0.809725			0.992941	0.525545	1.16559	0.418825	0.622277
	441.457	389.117	435.082	331.342		419.136	1.05325	0.928378	1.03804	0.790536			0.932743	0.51479	0.910701	0.794912	0.828059			5.66487	4.45683	6.65253	4.11361		5.11241	1.10806	0.871767	1.30125	0.804631			0.932285	0.405763	1.07017	0.318302	0.835796
	441.102	380.417	428.337	281.435		419.136	1.05241	0.907622	1.02195	0.671465			0.927564	0.487407	0.865279	0.854891	0.965428			5.51385	4.36165	5.77145	1.7453		5.11241	1.07852	0.85315	1.12891	0.341384			0.790824	0.389391	1.0259	0.421966	0.765199
	427.75	361.719	416.394			419.136	1.02055	0.863012	0.993458				0.911232	0.857613	1.05292	0.84477	0.900748			4.9868	4.0269	5.77137			5.11241	0.975431	0.787671	1.12889				1.34678	0.492893	0.942493	0.507715	0.720828
	419.82	345.485	407.329			419.136	1.00163	0.824279	0.97183				0.544349	0.750868	0.929913	0.729405	0.867466			4.79244	3.72153	5.36747			5.11241	0.937412	0.727939	1.04989				0.582871	0.442307	0.925676	0.694733	0.335174
	399.835	341.292	382.376			419.136	0.953951	0.814275	0.912296				1.25252	0.665387	0.881712	0.816807	0.756251			4.55192	3.44168	5.09321			5.11241	0.890367	0.673202	0.996244				1.07868	0.372623	0.92153		0.507916
	386.933	329.954				419.136	0.923168	0.787225					1.15546	0.656455	0.789413		0.866961			4.35805	2.8563				5.11241	0.852445	0.5587					1.04989	0.336956	0.828109		0.32608
	381.628	310.532				419.136	0.910512	0.740886					0.592025	0.653106	0.74533		0.940778			4.23192	2.39594				5.11241	0.827774	0.468651					0.970267	0.44053	0.758118		0.472301
	373.703					419.136	0.891604						1.01226	0.648155	0.72913		0.797395			4.05943					5.11241	0.794034						0.90116	0.32349	0.609874		0.384329
	354.607					419.136	0.846044						0.786822	0.802335	0.671067					3.82469					5.11241	0.748119						1.53741	0.247038	0.556957		0.543174
	291.239					419.136	0.694856						1.24574	0.431167	0.961925					3.5246					5.11241	0.689421						0.781345	0.277456	1.1388
	419.136					419.136							0.941916	0.609979	1.32269					5.11241												0.621931	0.465118	1.72058
													0.894014	0.444528	0.574122																	1.05098	0.93342	0.714179
23.08.30													1.22241	0.427724	1.28957																	0.609291	0.650227	1.34797
	GFP_Vector	GFP-2A-Cre + Vector	GFP-2A-Cre + EndoA1	GFP-2A-Cre + △SH3	GFP-2A-Cre + aa172-352	Average	GFP_Vector	GFP-2A-Cre + Vector	GFP-2A-Cre + EndoA1				1.6711	0.496016	1.02625					5.71538	6.10646	6.96337			3.5984	1.58831	1.69699	1.93513				0.912489	0.512378	1.64345
	656.902	368.533	734.544			448.237	1.46552	0.822184	1.63874				1.10307	0.638673	1.09813					4.50131	3.87734	6.27969			3.5984	1.25092	1.07752	1.74513				0.864007	0.159081	1.34757
	506.58	362.707	665.226			448.237	1.13016	0.809185	1.48409				1.09043	0.758684	1.31473					3.573	3.76598	4.86234			3.5984	0.992941	1.04657	1.35125				1.05924	0.311635	1.55149
	474.975	350.945	513.01			448.237	1.05965	0.782945	1.14451				1.11532	0.79464						3.49982	3.689	4.30507			3.5984	0.972606	1.02518	1.19638				1.24785	0.278478
	461.135	317.47	488.083			448.237	1.02878	0.708264	1.0889				1.00926	0.691053						3.35473	2.80211	4.30049			3.5984	0.932285	0.77871	1.19511				0.675879	0.441345
	418.09	291.57	483.365			448.237	0.932743	0.650482	1.07837				0.906597	0.686685						2.85101	1.91711	4.10625			3.5984	0.792299	0.532767	1.14113				1.50023	0.484704
	415.769	252.36	435.755			448.237	0.927564	0.563006	0.972153				0.961943	0.771053						2.8457	1.61214	3.87252			3.5984	0.790824	0.448015	1.07618				1.10042	0.402711
	408.448	243.425	421.758			448.237	0.911232	0.543072	0.940927				1.06726	0.797477						2.44623		3.7073			3.5984	0.679811		1.03026				0.863405	0.541874
	243.998		408.21			448.237	0.544349		0.910701				1.05494	0.75176						3.5984		3.53439			3.5984	1		0.982211				0.860067
	448.237		387.85			448.237	1		0.865279					0.837327								3.07796			3.5984			0.855369
			374.612			448.237			0.835745					1.10935								2.74281			3.5984			0.762231
			295.83			448.237			0.659986					0.748881						GFP_Vector	GFP-2A-Cre + Vector	GFP-2A-Cre + EndoA1	GFP-2A-Cre + △SH3	GFP-2A-Cre + aa172-352	GFP_Vector	GFP-2A-Cre + Vector	GFP-2A-Cre + EndoA1	GFP-2A-Cre + △SH3	GFP-2A-Cre + aa172-352	Average
	GFP_Vector	GFP-2A-Cre + Vector	GFP-2A-Cre + EndoA1	GFP-2A-Cre + △SH3	GFP-2A-Cre + aa172-352	Average	GFP_Vector	GFP-2A-Cre + Vector	GFP-2A-Cre + EndoA1											7.20496	4.64655	8.15787			5.34977	1.34678	0.868553	1.5249
	863.065	739.69	725.528			689.064	1.25252	1.07347	1.05292											5.72611	4.33377	7.11815			5.34977	1.07035	0.810085	1.33055
	796.184	642.34	644.334			689.064	1.15546	0.932192	0.935086											3.11823	3.42928	6.6532			5.34977	0.582871	0.641015	1.24364
	407.943	524.17	640.77			689.064	0.592025	0.760698	0.929913											5.34977	3.14012	6.26223			5.34977	1	0.586964	1.17056
	689.064	464.417	617.587			689.064	1	0.673982	0.896269												2.94294	6.23562			5.34977		0.550106	1.16559
		437.077	607.556			689.064		0.634305	0.881712												2.82731	5.72514			5.34977		0.528492	1.07017
		425.382	556.415			689.064		0.617334	0.807494												2.81154	5.48833			5.34977		0.525545	1.0259
		413.925	543.956			689.064		0.600706	0.789413												2.25731	5.20837			5.34977		0.421946	0.97357
		379.812	527.816			689.064		0.551201	0.76599												2.17074	5.04212			5.34977		0.405763	0.942493
		354.723	513.58			689.064		0.51479	0.74533												2.09473	4.95215			5.34977		0.391556	0.925676
		351.702	506.873			689.064		0.510405	0.735596												2.08315	4.92997			5.34977		0.389391	0.92153
		335.855	502.418			689.064		0.487407	0.72913												1.06515	4.49955			5.34977		0.199102	0.841075
		300.335	498.22			689.064		0.435859	0.723039													4.43019			5.34977			0.828109
			462.408			689.064			0.671067													4.05576			5.34977			0.758118
			433.337			689.064			0.628877													3.30453			5.34977			0.617695
			413.615			689.064			0.600256													3.26268			5.34977			0.609874
			373.87			689.064			0.542577													2.97959			5.34977			0.556957
																						2.48052			5.34977			0.46367
	GFP_Vector	GFP-2A-Cre + Vector	GFP-2A-Cre + EndoA1	GFP-2A-Cre + △SH3	GFP-2A-Cre + aa172-352	Average	GFP_Vector	GFP-2A-Cre + Vector	GFP-2A-Cre + EndoA1
24.12.05	923.594					698.857	1.32158
	707.428					698.857	1.01226													9.08626					8.4235	1.07868
	614.531					698.857	0.879337													8.84378					8.4235	1.04989
	549.876					698.857	0.786822													8.17304					8.4235	0.970267
	698.857					698.857	1													7.59092					8.4235	0.90116
						698.857														8.4235					8.4235	1
						698.857																			8.4235
						698.857
2023.06.16
	GFP_Vector	GFP-2A-Cre + Vector	GFP-2A-Cre + EndoA1	GFP-2A-Cre + △SH3	GFP-2A-Cre + aa172-352	Average	GFP_Vector	GFP-2A-Cre + Vector	GFP-2A-Cre + EndoA1											GFP_Vector	GFP-2A-Cre + Vector	GFP-2A-Cre + EndoA1	GFP-2A-Cre + △SH3	GFP-2A-Cre + aa172-352	Average	GFP_Vector	GFP-2A-Cre + Vector	GFP-2A-Cre + EndoA1
	591.126	406.952				474.517	1.24574	0.857613												5.50871	3.31322				3.58311	1.53741	0.924676
	472.546	356.3				474.517	0.995846	0.750868												4.6106	1.76609				3.58311	1.28676	0.492893
	446.955	315.738				474.517	0.941916	0.665387												2.79965	1.58483				3.58311	0.781345	0.442307
	437.735	311.5				474.517	0.922484	0.656455												2.76815	1.33515				3.58311	0.772555	0.372623
	424.225	309.91				474.517	0.894014	0.653106												2.22845	1.20735				3.58311	0.621931	0.336956
	474.517	307.561				474.517	1	0.648155												3.58311	0.878882				3.58311	1	0.245285
	GFP_Vector	GFP-2A-Cre + Vector	GFP-2A-Cre + EndoA1	GFP-2A-Cre + △SH3	GFP-2A-Cre + aa172-352	Average	GFP_Vector	GFP-2A-Cre + Vector	GFP-2A-Cre + EndoA1
	771.681				522.796	719.151	1.07304				0.726962									GFP_Vector	GFP-2A-Cre + Vector	GFP-2A-Cre + EndoA1	GFP-2A-Cre + △SH3	GFP-2A-Cre + aa172-352	Average	GFP_Vector	GFP-2A-Cre + Vector	GFP-2A-Cre + EndoA1
	764.307				347.283	719.151	1.06279				0.482906									8.76921				3.32384	6.02483	1.45551				0.551691
	696.808				323.617	719.151	0.968932				0.449999									5.82388				2.85667	6.02483	0.966647				0.47415
	645.62				528.152	719.151	0.897753				0.73441									5.56193				3.02362	6.02483	0.923168				0.501859
	717.34				528.144	719.151	0.997481				0.734399									3.99144				2.1752	6.02483	0.662499				0.361039
	719.151				430.347	719.151	1				0.59841									5.97768				1.89328	6.02483	0.992174				0.314245
					459	719.151					0.638252									6.02483				3.35157	7.02483					0.477103
					529.032	719.151					0.735634													4.522	8.02483					0.563501
					613.172	719.151					0.852633													4.64324	9.02483					0.514496
					620.023	719.151					0.86216													4.38501	10.0248					0.437415
					723.342	719.151					1.00583													5.13039	11.0248					0.465349
					489.728	719.151					0.680981													3.44027	12.0248					0.286097
																								3.74912	13.0248					0.287844
	GFP_Vector	GFP-2A-Cre + Vector	GFP-2A-Cre + EndoA1	GFP-2A-Cre + △SH3	GFP-2A-Cre + aa172-352	Average	GFP_Vector	GFP-2A-Cre + Vector	GFP-2A-Cre + EndoA1											GFP_Vector	GFP-2A-Cre + Vector	GFP-2A-Cre + EndoA1	GFP-2A-Cre + △SH3	GFP-2A-Cre + aa172-352	Average	GFP_Vector	GFP-2A-Cre + Vector	GFP-2A-Cre + EndoA1
2025.01.29	724.08	570.1	683.497			710.551	1.01904	0.802335	0.961925											5.31998	1.92343	4.97219			4.36617	1.21846	0.44053	1.1388
	783.79	306.366	939.838			710.551	1.10307	0.431167	1.32269											3.7724	1.41241	7.51233			4.36617	0.864007	0.32349	1.72058
	679.54	433.421	407.943			710.551	0.956356	0.609979	0.574122											3.85204	1.78805	3.11823			4.36617	0.882247	0.409524	0.714179
	774.805	315.86				710.551	1.09043	0.444528												4.6248	1.07861				4.36617	1.05924	0.247038
	552.815	303.92				710.551	0.778008	0.427724												4.08342	1.21142				4.36617	0.935243	0.277456
	792.49	352.445				710.551	1.11532	0.496016												5.44831	1.53808				4.36617	1.24785	0.352274
	666.34	453.81				710.551	0.937779	0.638673												3.4622	2.03078				4.36617	0.792962	0.465118
	710.551					710.551	1													4.36617	4.07546				4.36617	1	0.93342
	GFP_Vector	GFP-2A-Cre + Vector	GFP-2A-Cre + EndoA1	GFP-2A-Cre + △SH3	GFP-2A-Cre + aa172-352	Average	GFP_Vector	GFP-2A-Cre + Vector	GFP-2A-Cre + EndoA1											GFP_Vector	GFP-2A-Cre + Vector	GFP-2A-Cre + EndoA1	GFP-2A-Cre + △SH3	GFP-2A-Cre + aa172-352	Average	GFP_Vector	GFP-2A-Cre + Vector	GFP-2A-Cre + EndoA1
	426.986	320.974	545.576	424.316	350.325	423.067	1.00926	0.758684	1.28957	1.00295	0.828059									3.18422	3.06337	6.35061	2.41301	3.93763	4.71123	0.675879	0.650227	1.34797	0.512183	0.835796
	383.552	336.187	434.171	319.631	408.441	423.067	0.906597	0.79464	1.02625	0.755508	0.965428									7.06793	2.41393	7.74268	2.03685	3.60503	4.71123	1.50023	0.512378	1.64345	0.432339	0.765199
	406.967	292.362	464.585	316.382	381.077	423.067	0.961943	0.691053	1.09813	0.74783	0.900748									5.18433	0.749467	6.34873	1.91027	3.39599	4.71123	1.10042	0.159081	1.34757	0.405471	0.720828
	451.521	290.514	556.218	292.992	366.997	423.067	1.06726	0.686685	1.31473	0.692542	0.867466									4.0677	1.46818	7.30944	2.38596	1.57908	4.71123	0.863405	0.311635	1.55149	0.50644	0.335174
	446.312	326.207		336.301	319.945	423.067	1.05494	0.771053		0.794912	0.756251									4.05197	1.31198		1.97318	2.39291	4.71123	0.860067	0.278478		0.418825	0.507916
	423.067	337.387		361.677	366.783	423.067	1	0.797477		0.854891	0.866961									4.71123	2.07928		1.49959	1.53624	4.71123	1	0.441345		0.318302	0.32608
		318.045		357.395	398.013	423.067		0.75176		0.84477	0.940778										2.28355		1.98798	2.22512	4.71123		0.484704		0.421966	0.472301
		354.246		308.587	337.352	423.067		0.837327		0.729405	0.797395										1.89726		2.39196	1.81066	4.71123		0.402711		0.507715	0.384329
		469.332		345.565		423.067		1.10935		0.816807											2.55289		3.27305	2.55902	4.71123		0.541874		0.694733	0.543174
		316.827				423.067		0.748881													1.09538		4.27305	3.55902	4.71123		0.232503		0.906992	0.755433
