# Supplementary material for: Endophilin A1 facilitates organization of the GABAergic postsynaptic machinery to maintain excitation-inhibition balance
Source: eLife. 2025 Oct 2;13:RP102792. doi: 10.7554/eLife.102792 (PMC12490859; doi:10.7554/eLife.102792)
Supplement: Figure 6—figure supplement 1—source data 1. [file elife-102792-fig6-figsupp1-data1.xlsx]

## Sheet: Fig 6-s1C
Source data
shCtrl + Vector								shp140Cap + Vector								shp140Cap + p140Cap								Normalize
souce	mean intensity	intensity of per neuron	number	length	puncta number of per 10 μm	puncta number of per neuron		souce	mean intensity	intensity of per neuron	number	length	puncta number of per 10 μm	puncta number of per neuron		souce	mean intensity	intensity of per neuron	number	length	puncta number of per 10 μm	puncta number of per neuron		mean intensity								number
20200830-S6-GPN-CTRL-V-1-100X-P-MaxIP	291.15		9	32.34	2.78293			20200930-S4-GPN-SH-V-1-100X-4Z-P5-MaxIP	MeanGreen		number					20200830-S5-GPN-SH-P140-1-100X-P-MaxIP	299.11		5	31.77	1.57381			shCtrl + Vector	shp140Cap + Vector	shp140Cap + p140Cap		shCtrl + Vector	shp140Cap + Vector	shp140Cap + p140Cap		shCtrl + Vector	shp140Cap + Vector	shp140Cap + p140Cap		shCtrl + Vector	shp140Cap + Vector	shp140Cap + p140Cap
20200830-S6-GPN-CTRL-V-2-100X-P1-MaxIP	238.3		4	33.03	1.21102			20200930-S4-GPN-SH-V-1-100X-4Z-F-MaxIP	136.04		1	50.2				20200830-S5-GPN-SH-P140-1-100X-P2-MaxIP	360.52		3	31.97	0.93838			234.356	196.408	335.259	377.466	0.620866	0.520334	0.888184		2.69038	2.03889	1.19279	2.64951	1.01542	0.769536	0.450191
20200830-S6-GPN-CTRL-V-1-100X-P1-MaxIP	269.57		11	68.34	1.6096			20200930-S4-GPN-SH-V-1-100X-4Z-P-MaxIP	224.64		4					20200830-S5-GPN-SH-P140-1-100X-P1-MaxIP	423.34		5	31.39	1.59286			412.025	194.379	336.232	377.466	1.09156	0.514958	0.890761		2.59616	1.74587	2.91076	2.64951	0.979863	0.658942	1.0986
20200830-S6-GPN-CTRL-V-2-100X-P-MaxIP	245.69		15	37.74	3.97456			20200930-S4-GPN-SH-V-1-100X-4Z-P1-MaxIP	263.41		9	56.07				20200830-S5-GPN-SH-P140-1-100X-S-MaxIP	473.97		2	30.67	0.652103			310.307	297.86	310.03	377.466	0.822079	0.789105	0.821346		1.92702	2.11991	3.93701	2.64951	0.727312	0.800114	1.48594
20200830-S6-GPN-CTRL-V-2-100X-P2.ics	196.8		5	26.59	1.88041			20200930-S4-GPN-SH-V-1-100X-4Z-P3-MaxIP	190.73		6	32.23				20200830-S5-GPN-SH-P140-1-100X-S1-MaxIP	207.4		4	39.94	1.0015			281.452	254.933	295.919	377.466	0.745635	0.675381	0.783961		2.82718	2.64269	3.25859	2.64951	1.06706	0.997427	1.22988
20200830-S6-GPN-CTRL-V-2-100X-S-MaxIP	192.25		13	59.95	2.16847			20200930-S4-GPN-SH-V-1-100X-4Z-P5-MaxIP	264.57		6	59.03				20200830-S5-GPN-SH-P140-1-100X-S2-MaxIP	292.49		3	31.25	0.96			406.32	334.185	599.283	377.466	1.07644	0.885339	1.58765		2.08017	2.1361	3.65926	2.64951	0.785117	0.806224	1.38111
20200830-S6-GPN-CTRL-V-2-100X-T-MaxIP	206.73	234.356	9	32.87	2.73806	2.69038		20200930-S4-GPN-SH-V-1-100X-4Z-S-MaxIP	244.01		6	32.13				20200830-S5-GPN-SH-P140-1-100X-S3-MaxIP	311.05	335.259	3	33.23	0.902799			549.841	138.075	393.078	377.466	1.45667	0.365795	1.04136		2.9117	2.79525	5.2906	2.64951	1.09896	1.05501	1.99682
20200830-S6-GPN-CTRL-V-3-100X-P1-MaxIP	406.42		6	31.47	1.90658			20200930-S4-GPN-SH-V-1-100X-4Z-S1-MaxIP	196.91		3	56.29				20200830-S5-GPN-SH-P140-1-100X-T-MaxIP	381.58		14	83.14	1.68391			409.755	225.933	419.755	377.466	1.08554	0.598551	1.11204		2.69876	0.549543	2.2571	2.64951	1.01859	0.207413	0.851894
20200830-S6-GPN-CTRL-V-3-100X-P1-MaxIP	387.17		10	32.1	3.11526			20200930-S4-GPN-SH-V-1-100X-4Z-S2-MaxIP			4	48.39				20200830-S5-GPN-SH-P140-1-100X-T1-MaxIP	267.87		9	62.95	1.42971	1.19279		344.603	291.987	360.208	377.466	0.912939	0.773545	0.95428		1.44179	1.78013	2.05885	2.64951	0.544171	0.671872	0.777068
20200830-S6-GPN-CTRL-V-3-100X-P2-MaxIP	483.52		10	40.57	2.46488			20200930-S4-GPN-SH-V-1-100X-4Z-S2-MaxIP	216.74		18	53.16	3.386			20200830-S5-GPN-SH-P140-2-100X-F-MaxIP	204.09		10	32.31	3.09502			352.85	229.363	282.973	377.466	0.934787	0.60764	0.749666		1.56499	1.66246	3.03967	2.64951	0.590671	0.627462	1.14726
20200830-S6-GPN-CTRL-V-3-100X-P.ics	267.76		10	34.7	2.88184			20200930-S4-GPN-SH-V-1-100X-4Z-S3-MaxIP	191.15		7	32.47	2.15584			20200830-S5-GPN-SH-P140-2-100X-P-MaxIP	299.84		14	52.25	2.67943			242.56	326.202	499.322	377.466	0.642601	0.864191	1.32283		1.25117	2.63264	15.6932	2.64951	0.472228	0.993635	5.92307
20200830-S6-GPN-CTRL-V-3-100X-P3.ics	337.34		9	29.83	3.0171			20200930-S4-GPN-SH-V-1-100X-4Z-S4-MaxIP	200.04		12	30.14	3.98142			20200830-S5-GPN-SH-P140-2-100X-P1-MaxIP	304.8		4	31.62	1.26502			54.21	310.868	254.991	377.466	0.143616	0.823567	0.675535		1.21544	1.91061	6.43216	2.64951	0.45874	0.721118	2.42768
20200830-S6-GPN-CTRL-V-3-100X-P3.ics	577.81		10	30.97	3.22893			20200930-S4-GPN-SH-V-1-100X-4Z-S5-MaxIP	200.51		13	66.28	1.96138			20200830-S5-GPN-SH-P140-2-100X-S-MaxIP	469.79		15	31.39	4.77859			492.227	339.285	432.832	377.466	1.30403	0.89885	1.14668		5.76643	1.17	1.90295	2.64951	2.17642	0.441593	0.718228
20200830-S6-GPN-CTRL-V-3-100X-S2-MaxIP	383.29		5	32.39	1.54369			20200930-S4-GPN-SH-V-1-100X-4Z-T-MaxIP	188.34		8	31.93	2.50548			20200830-S5-GPN-SH-P140-2-100X-T-MaxIP	328.29		6	31.54	1.90235			405.606	216.812	275.052	377.466	1.07455	0.574389	0.728681		4.12426	1.81374	3.65978	2.64951	1.55661	0.684559	1.3813
20200830-S6-GPN-CTRL-V-4-100X-P1-MaxIP	452.89	412.025	4	15.32	2.61097	2.59616		20200930-S4-GPN-SH-V-1-100X-4Z-T1-MaxIP	163.11		2	32.46	0.616143			20200830-S5-GPN-SH-P140-2-100X-T1-MaxIP	410.58	336.232	12	32.05	3.74415	2.91076		383.645	337.32	277.87	377.466	1.01637	0.893644	0.736146		3.23444	0.887112	1.66958	2.64951	1.22077	0.334821	0.630148
20200830-S6-GPN-CTRL-V-5-100X-S1.ics	273.67		7	33.45	2.09268			20200930-S4-GPN-SH-V-1-100X-4Z-T2-MaxIP	118.96		3	32.55	0.921659			20200830-S5-GPN-SH-P140-3-100X-P-MaxIP	362.05		28	50.75	5.51724			340.652	259.182	325.154	377.466	0.902471	0.686636	0.861414		2.29364	2.10622	1.4908	2.64951	0.865684	0.794947	0.562671
20200830-S6-GPN-CTRL-V-5-100X-T1-MaxIP	358.84		8	31.68	2.52525			20200930-S4-GPN-SH-V-1-100X-4Z-T3-MaxIP	171.23		7	31.8	2.20126			20200830-S5-GPN-SH-P140-3-100X-P1-MaxIP	368.96		18	31.6	5.6962			595.975	319.083	436.217	377.466	1.57889	0.845331	1.15565		2.91663	1.38794	2.36295	2.64951	1.10082	0.523848	0.891843
20200830-S6-GPN-CTRL-V-5-100X-T2-MaxIP	298.41	310.307	4	34.39	1.16313	1.92702		20200930-S4-GPN-SH-V-1-100X-4Z-T4-MaxIP	216.55		4	31.71	1.26143			20200830-S5-GPN-SH-P140-3-100X-P2-MaxIP	304.14		8	32.59	2.45474			441.7	355.243	275.371	377.466	1.17017	0.941125	0.729526		2.06945	0.712888	2.67168	2.64951	0.781069	0.269064	1.00837
20200830-S6-GPN-CTRL-V-6-100X-P-MaxIP	333.01		11	32.66	3.36803			20200930-S4-GPN-SH-V-1-100X-4Z-T5-MaxIP	155.86		5	31.97	1.56397			20200830-S5-GPN-SH-P140-3-100X-S-MaxIP	341.25		15	32.25	4.65116			324.653	359.347	315.676	377.466	0.860087	0.951998	0.836303		2.46822	1.197	3.17083	2.64951	0.931577	0.451784	1.19676
20200830-S6-GPN-CTRL-V-6-100X-P1-MaxIP	289.89		17	60.16	2.8258			20200930-S4-GPN-SH-V-1-100X-4Z-T6-MaxIP	192.55	196.408	6	32.03	1.87324	2.03889		20200830-S5-GPN-SH-P140-3-100X-S1-MaxIP	235.13		13	37.26	3.489			589.112	431.26	339.7	377.466	1.5607	1.14251	0.899949		4.26282	2.40308	2.80051	2.64951	1.60891	0.906993	1.05699
20200830-S6-GPN-CTRL-V-6-100X-P2-MaxIP	278.45		13	45.92	2.83101			20200930-S4-GPN-SH-V-2-100X-4Z-P-MaxIP	373.8		4	31.3	1.27796			20200830-S5-GPN-SH-P140-3-100X-T-MaxIP	248.65	310.03	12	30.48	3.93701	3.93701		377.466		274.44	377.466	1		0.727059		2.64951	1.99691	2.53499	2.64951	1	0.75369	0.956779
20200830-S6-GPN-CTRL-V-6-100X-P3-MaxIP	285.94		20	56.12	3.56379			20200930-S4-GPN-SH-V-2-100X-4Z-P1-MaxIP	267.22		7	31.62	2.21379	1.74587		20200830-S5-GPN-SH-P140-5-100X-S1-MaxIP	364.98		13	31.85	4.08163					364.613	377.466			0.965951				2.73874	2.64951			1.03368
20200830-S6-GPN-CTRL-V-6-100X-S-MaxIP	245.13		7	37.58	1.86269			20200930-S4-GPN-SH-V-3-100X-4Z-P-MaxIP	298.33		14	31.35	4.46571			20200830-S5-GPN-SH-P140-4-100X-P-MaxIP	437.22		21	32.75	6.41221					373.304	377.466			0.988975				2.55259	2.64951			0.96342
20200830-S6-GPN-CTRL-V-6-100X-S1-MaxIP	256.29	281.452	8	31.85	2.51177	2.82718		20200930-S4-GPN-SH-V-3-100X-4Z-P1-MaxIP	224.27		3	31.94	0.939261			20200830-S5-GPN-SH-P140-4-100X-P1-MaxIP	256.2		7	31.46	2.22505					336.046	377.466			0.890269				2.85396	2.64951			1.07717
20200830-S6-GPN-CTRL-V-7-100X-P1-MaxIP	256.68		11	61.53	1.78775			20200930-S4-GPN-SH-V-3-100X-4Z-P2-MaxIP	208.33		8	31.5	2.53968			20200830-S5-GPN-SH-P140-4-100X-P2-MaxIP	235.14		6	49.32	1.21655													3.93236	2.64951			1.48419
20200830-S6-GPN-CTRL-V-8-100X-S.ics	272.5		9	30.09	2.99103			20200930-S4-GPN-SH-V-3-100X-4Z-P3-MaxIP	210.34		12	61.98	1.93611			20200830-S5-GPN-SH-P140-4-100X-P3-MaxIP	380.06		16	37.85	4.22721
20200830-S6-GPN-CTRL-V-9-100X-P-MaxIP	511.49		15	70.97	2.11357			20200930-S4-GPN-SH-V-3-100X-4Z-S-MaxIP	170.4		6	32.29	1.85816			20200830-S5-GPN-SH-P140-4-100X-S-MaxIP	256.72		9	31.55	2.85261
20200830-S6-GPN-CTRL-V-9-100X-P1-MaxIP	545.32		3	30.72	0.976562			20200930-S4-GPN-SH-V-3-100X-4Z-S2-MaxIP	183.3		8	31.87	2.5102			20200830-S5-GPN-SH-P140-4-100X-S1-MaxIP	222.83		8	32.46	2.46457
20200830-S6-GPN-CTRL-V-9-100X-P2-MaxIP	396.06		8	31.51	2.53888			20200930-S4-GPN-SH-V-3-100X-4Z-S4-MaxIP	168.41		15	63.59	2.35886			20200830-S5-GPN-SH-P140-4-100X-T-MaxIP	283.26	295.919	11	32.24	3.41191	3.25859
20200830-S6-GPN-CTRL-V-9-100X-S-MaxIP	455.87	406.32	6	28.94	2.07326	2.08017		20200930-S4-GPN-SH-V-3-100X-4Z-S5-MaxIP	196.69		10	31.95	3.12989			20200830-S5-GPN-SH-P140-5-100X-F-MaxIP	862.48		14	31.89	4.39009
20200830-S6-GPN-CTRL-V-10-100X-F-MaxIP	371.78		6	31.39	1.91144			20200930-S4-GPN-SH-V-3-100X-4Z-T-MaxIP	123.44		3	32.05	0.936037			20200830-S5-GPN-SH-P140-5-100X-F1-MaxIP	325.81		13	31.74	4.09578
20200830-S6-GPN-CTRL-V-10-100X-P-MaxIP	629.97		3	31.87	0.941324			20200930-S4-GPN-SH-V-3-100X-4Z-T1-MaxIP	173.76		9	63.05	1.42744			20200830-S5-GPN-SH-P140-5-100X-P-MaxIP	701.87		8	31.65	2.52765
20200830-S6-GPN-CTRL-V-10-100X-P1-MaxIP	460.04		18	54.04	3.33087			20200930-S4-GPN-SH-V-3-100X-4Z-T2-MaxIP	180.9	194.379	4	32.85	1.21766	2.11991		20200830-S5-GPN-SH-P140-5-100X-P1-MaxIP	532.58		8	31.24	2.56082
20200830-S6-GPN-CTRL-V-10-100X-P2-MaxIP	811.71		11	43.9	2.50569			20200930-S4-GPN-SH-V-4-100X-4Z-P1-MaxIP	279.05		10	50.43	1.98295			20200830-S5-GPN-SH-P140-5-100X-S2-MaxIP	448.28		42	69.34	6.05711
20200830-S6-GPN-CTRL-V-10-100X-S-MaxIP	532.5		9	49.92	1.80288			20200930-S4-GPN-SH-V-4-100X-4Z-S-MaxIP	335.48		12	32.1	3.73832			20200830-S5-GPN-SH-P140-5-100X-S3-MaxIP	582.48		10	31.75	3.14961
20200830-S6-GPN-CTRL-V-10-100X-S1-MaxIP	654.39		15	31.77	4.72144			20200930-S4-GPN-SH-V-4-100X-4Z-P1-MaxIP	279.05	297.86	7	31.72	2.20681	2.64269		20200830-S5-GPN-SH-P140-5-100X-S4-MaxIP	741.48	599.283	9	31.76	2.83375	3.65926
20200830-S6-GPN-CTRL-V-10-100X-S3-MaxIP	325.35		7	32.31	2.16651			20200930-S4-GPN-SH-V-5-100X-4Z-P1-MaxIP	238.91		3	34.31	0.874381			20200830-S5-GPN-SH-P140-7-100X-S1-MaxIP	443.84		8	33.79	2.36756
20200830-S6-GPN-CTRL-V-10-100X-T-MaxIP	612.99	549.841	19	32.13	5.91348	2.9117		20200930-S4-GPN-SH-V-5-100X-4Z-P2-MaxIP	282.58		10	32.33	3.0931			20200830-S5-GPN-SH-P140-5-100X-Sids-MaxIP	485.21		10	31.49	3.17561
20200830-S6-GPN-CTRL-V-11-100X-P-MaxIP	414.47		8	32.17	2.48679			20200930-S4-GPN-SH-V-5-100X-4Z-S-MaxIP	320.16		15	63.72	2.35405			20200830-S5-GPN-SH-P140-5-100X-T-MaxIP	332.32		22	31.19	7.05354
20200830-S6-GPN-CTRL-V-11-100X-P1-MaxIP	405.04	409.755	9	30.92	2.91074	2.69876		20200930-S4-GPN-SH-V-5-100X-4Z-S1-MaxIP	282.2		7	31.77	2.20334			20200830-S5-GPN-SH-P140-5-100X-T1-MaxIP	439.13		18	31.9	5.64263	5.2906
20200830-S6-GPN-CTRL-V-12-100-P-MaxIP	520.27		4	22.95	1.74292			20200930-S4-GPN-SH-V-5-100X-4Z-S2-MaxIP	200.61		9	32.26	2.78983			20200830-S5-GPN-SH-P140-6-100X-F-MaxIP	275.03		5	31.75	1.5748
20200830-S6-GPN-CTRL-V-13-10-P-MaxIP	319.76		6	31.92	1.8797			20200930-S4-GPN-SH-V-5-100X-4Z-T-MaxIP	205.14	254.933	6	39.95	1.50188	2.1361		20200830-S5-GPN-SH-P140-6-100X-P-MaxIP	519.03		13	32.07	4.05363
20200830-S6-GPN-CTRL-V-13-10-S.ics	193.78	344.603	3	42.69	0.702741	1.44179		20200930-S4-GPN-SH-V-7-100X-4Z-P1.ics	333.29		6	31.44	1.9084			20200830-S5-GPN-SH-P140-6-100X-S-MaxIP	513.83		10	31.69	3.15557
20200830-S6-GPN-CTRL-V-14-100-4Z-P-MaxIP	360.32		4	31.43	1.27267			20200930-S4-GPN-SH-V-7-100X-4Z-S-MaxIP	335.08	334.185	12	32.59	3.68211	2.79525		20200830-S5-GPN-SH-P140-6-100X-S1-MaxIP	379.8		5	32.22	1.55183
20200830-S6-GPN-CTRL-V-14-100-4Z-P1-MaxIP	347.61		2	31.68	0.631313			20200930-S4-GPN-SH-V-8-100X-4Z-P.ics	88.15		2	31.53	0.634317			20200830-S5-GPN-SH-P140-6-100X-T-MaxIP	277.7	393.078	3	31.59	0.949668	2.2571
20200830-S6-GPN-CTRL-V-14-100-4Z-S-MaxIP	365.02		7	32.06	2.18341			20200930-S4-GPN-SH-V-8-100X-4Z-S-MaxIP	144.71		2	32.26	0.619963			20200830-S5-GPN-SH-P140-7-100X-P-MaxIP	466.52		4	32.08	1.24688
20200830-S6-GPN-CTRL-V-14-100-4Z-T-MaxIP	338.45	352.85	7	32.22	2.17256	1.56499		20200930-S4-GPN-SH-V-8-100X-4Z-S1-MaxIP	164.78		1	31.85	0.313972			20200830-S5-GPN-SH-P140-7-100X-S-MaxIP	484.9	419.755	9	31.35	2.87081	2.05885
20200830-S6-GPN-CTRL-V-15-100-4Z-P1-MaxIP	242.56	242.56	4	31.97	1.25117	1.25117		20200930-S4-GPN-SH-V-8-100X-4Z-S2-MaxIP	154.66	138.075	2	31.75	0.629921	0.549543		20200830-S5-GPN-SH-P140-8-100X-P1-MaxIP	366.8		14	32.06	4.36681
20200830-S6-GPN-CTRL-V-17-100-4Z-F-MaxIP	54.21	54.21	3	32.91	0.911577	1.21544		20200930-S4-GPN-SH-V-9-100X-4Z-P-MaxIP	315.09		5	32.19	1.55328			20200830-S5-GPN-SH-P140-9-100X-F-MaxIP	332.31		9	34.44	2.61324
20200830-S6-GPN-CTRL-V-16-100-4Z-T-MaxIP	336.48		14	52.27	2.6784			20200930-S4-GPN-SH-V-9-100X-4Z-P2-MaxIP	186.26		6	31.74	1.89036			20200830-S5-GPN-SH-P140-8-100X-S-MaxIP	372.37		14	57.46	2.43648
20200830-S6-GPN-CTRL-V-16-100-4Z-S2-MaxIP	543.73		37	51.48	7.18726			20200930-S4-GPN-SH-V-9-100X-4Z-S-MaxIP	200.44		7	32.8	2.13415			20200830-S5-GPN-SH-P140-8-100X-S1-MaxIP	361.97		21	59.23	3.5455
20200830-S6-GPN-CTRL-V-16-100-4Z-S1-MaxIP	537.37		40	49.35	8.10537			20200930-S4-GPN-SH-V-9-100X-4Z-S1-MaxIP	201.94	225.933	5	32.41	1.54273	1.78013		20200830-S5-GPN-SH-P140-8-100X-T-MaxIP	367.59	360.208	12	53.66	2.2363	3.03967
20200830-S6-GPN-CTRL-V-16-100-4Z-S1-MaxIP	542.47		25	48.71	5.13242			20200930-S4-GPN-SH-V-10-100X-4Z-P-MaxIP	254.89		11	85.35	1.28881			20200830-S5-GPN-SH-P140-9-100X-P-MaxIP	299.19		12	67.47	1.77857
20200830-S6-GPN-CTRL-V-16-100-4Z-S-MaxIP	418.26		20	64.54	3.09885			20200930-S4-GPN-SH-V-10-100X-4Z-P1-MaxIP	339.07		6	32.38	1.853			20200830-S5-GPN-SH-P140-9-100X-P1-MaxIP	282.77		12	42.72	2.80899
20200830-S6-GPN-CTRL-V-16-100-4Z-P-MaxIP	575.05	492.227	70	83.37	8.39631	5.76643		20200930-S4-GPN-SH-V-10-100X-4Z-P2-MaxIP	282	291.987	6	32.51	1.84559	1.66246		20200830-S5-GPN-SH-P140-9-100X-P2-MaxIP	226.67		2	29.8	0.671141
20200830-S6-GPN-CTRL-V-17-100-4Z-F-MaxIP	276.04		5	32.91	1.5193			20200930-S4-GPN-SH-V-11-100X-P-MaxIP	309.08		14	31.66	4.42198			20200830-S5-GPN-SH-P140-9-100X-P3-MaxIP	301.55		6	31.65	1.89573
20200830-S6-GPN-CTRL-V-18-100-4Z-P3-MaxIP	404.6		13	32.37	4.01606			20200930-S4-GPN-SH-V-11-100X-P1-MaxIP	210.07		12	43.92	2.73224			20200830-S5-GPN-SH-P140-9-100X-S-MaxIP	219.22		3	32.26	0.929944
20200830-S6-GPN-CTRL-V-18-100-4Z-P2-MaxIP	343.52		9	32.11	2.80287			20200930-S4-GPN-SH-V-11-100X-S-MaxIP	231.29		17	50.21	3.38578			20200830-S5-GPN-SH-P140-9-100X-S1-MaxIP	385.73		13	50.6	2.56917
20200830-S6-GPN-CTRL-V-18-100-4Z-P1-MaxIP	482.08		12	31.8	3.77358			20200930-S4-GPN-SH-V-11-100X-S1-MaxIP	228.75		7	32.12	2.17933			20200830-S5-GPN-SH-P140-9-100X-S2-MaxIP	272.31		4	31.85	1.25589
20200830-S6-GPN-CTRL-V-18-100-4Z-P-MaxIP	481.69		16	31.81	5.02986			20200930-S4-GPN-SH-V-11-100X-T-MaxIP	226.18		10	67.47	1.48214			20200830-S5-GPN-SH-P140-9-100X-S4-MaxIP	313.89		11	43.4	2.53456
20200830-S6-GPN-CTRL-V-17-100-4Z-S-MaxIP	483.66		16	36.42	4.39319			20200930-S4-GPN-SH-V-11-100X-T1-MaxIP	170.81	229.363	5	31.36	1.59439	2.63264		20200830-S5-GPN-SH-P140-9-100X-T-MaxIP	245.43	282.973	4	32.02	1.24922	15.6932
20200830-S6-GPN-CTRL-V-17-100-4Z-P1-MaxIP	367.65	405.606	21	54.47	3.85533	4.12426		20200930-S4-GPN-SH-V-12-100X-4Z-P-MaxIP	292.84		3	31.91	0.940144			20200830-S5-GPN-SH-P140-10-100X-P-MaxIP	498.37		25	38.2	6.5445
20200830-S6-GPN-CTRL-V-18-100-4Z-P4.ics	187.63		15	60.7	2.47117			20200930-S4-GPN-SH-V-12-100X-4Z-P2-MaxIP	449.82		11	48.31	2.27696			20200830-S5-GPN-SH-P140-10-100X-P1-MaxIP	623.86		35	42.51	8.23336
20200830-S6-GPN-CTRL-V-18-100-4Z-S-MaxIP	579.66	383.645	7	17.51	3.99772	3.23444		20200930-S4-GPN-SH-V-12-100X-4Z-S-MaxIP	361.48		23	66.96	3.43489			20200830-S5-GPN-SH-P140-10-100X-P1-MaxIP	623.86		20	33.19	6.02591
20200830-S6-GPN-CTRL-V-23-100-4Z-P2-MaxIP	359.8		11	64.43	1.70728			20200930-S4-GPN-SH-V-12-100X-4Z-S3-MaxIP	356.28		5	31.71	1.57679			20200830-S5-GPN-SH-P140-10-100X-S1-MaxIP	347.5		17	33.39	5.09134
20200830-S6-GPN-CTRL-V-23-100-4Z-P1-MaxIP	363.8		9	32.62	2.75904			20200930-S4-GPN-SH-V-12-100X-4Z-T-MaxIP	241.49		3	31.4	0.955414			20200830-S5-GPN-SH-P140-10-100X-S2-MaxIP	403.02	499.322	20	31.92	6.26566	6.43216
20200830-S6-GPN-CTRL-V-23-100-4Z-T-MaxIP	402.53		6	30.94	1.93924			20200930-S4-GPN-SH-V-12-100X-4Z-T-MaxIP	245.44		6	35.36	1.69683			20200830-S5-GPN-SH-P140-11-100X-P-MaxIP	206.21		3	35.91	0.835422
20200830-S6-GPN-CTRL-V-23-100-4Z-S-MaxIP	285.36		8	31.44	2.54453			20200930-S4-GPN-SH-V-12-100X-4Z-T2-MaxIP	246.27		6	32.2	1.86335			20200830-S5-GPN-SH-P140-11-100X-P1-MaxIP	321.4		8	48.17	1.66078
20200830-S6-GPN-CTRL-V-23-100-4Z-S3-MaxIP	291.77	340.652	8	31.77	2.5181	2.29364		20200930-S4-GPN-SH-V-12-100X-4Z-T3-MaxIP	416	326.202	8	31.49	2.54049	1.91061		20200830-S5-GPN-SH-P140-11-100X-P2-MaxIP	232.91		8	30.99	2.58148
20200830-S6-GPN-CTRL-V-22-100-4Z-P1-MaxIP	768.67		14	31.74	4.41084			20200930-S4-GPN-SH-V-13-100X-P-MaxIP	403.8		5	32.02	1.56152			20200830-S5-GPN-SH-P140-11-100X-S-MaxIP	218.67		9	31.36	2.8699
20200830-S6-GPN-CTRL-V-22-100-4Z-P-MaxIP	655.73		28	84.58	3.31048			20200930-S4-GPN-SH-V-13-100X-P1-MaxIP	337.4		5	32.4	1.54321			20200830-S5-GPN-SH-P140-11-100X-S1-MaxIP	256.76		7	31.74	2.20542
20200830-S6-GPN-CTRL-V-22-100-4Z-F-MaxIP	417.09		6	32.39	1.85242			20200930-S4-GPN-SH-V-13-100X-S-MaxIP	176.8		3	36.64	0.818777			20200830-S5-GPN-SH-P140-11-100X-S2.ics	327.97		3	32.24	0.930521
20200830-S6-GPN-CTRL-V-22-100-4Z-C-MaxIP	542.41	595.975	12	57.34	2.09278	2.91663		20200930-S4-GPN-SH-V-13-100X-S1-MaxIP	390.43		5	32.72	1.52812			20200830-S5-GPN-SH-P140-11-100X-S3-MaxIP	221.02	254.991	7	31.29	2.23714	1.90295
20200830-S6-GPN-CTRL-V-21-100-4Z-S1-MaxIP	430.12		15	65.44	2.29218			20200930-S4-GPN-SH-V-13-100X-S4-MaxIP	405.48		3	31.82	0.942803			20200830-S5-GPN-SH-P140-12-100X-C1-MaxIP	438.56		10	33.92	2.94811
20200830-S6-GPN-CTRL-V-21-100-4Z-P2-MaxIP	453.28	441.7	4	21.66	1.84672	2.06945		20200930-S4-GPN-SH-V-13-100X-T3.ics	151.3	310.868	2	31.97	0.625586	1.17		20200830-S5-GPN-SH-P140-13-100X-P-MaxIP	498.56		7	30.58	2.28908
20200830-S6-GPN-CTRL-V-28-100-4Z-T-MaxIP	243.76		5	31.9	1.5674			20200930-S4-GPN-SH-V-14-100X1-F-MaxIP	217.69		5	80.87	0.618276			20200830-S5-GPN-SH-P140-13-100X-P1-MaxIP	479.55		24	44.71	5.36793
20200830-S6-GPN-CTRL-V-28-100-4Z-T-MaxIP	264.45		11	30.19	3.64359			20200930-S4-GPN-SH-V-14-100X1-P-MaxIP	434.04		7	28.59	2.44841			20200830-S5-GPN-SH-P140-13-100X-P2-MaxIP	504.61		11	35.06	3.13748
20200830-S6-GPN-CTRL-V-28-100-4Z-P1-MaxIP	465.75	324.653	7	31.91	2.19367	2.46822		20200930-S4-GPN-SH-V-14-100X1-P1-MaxIP	304.89		17	55.37	3.07025			20200830-S5-GPN-SH-P140-13-100X-P3-MaxIP	358.63		11	54	2.03704
20200830-S6-GPN-CTRL-V-27-100-4Z-P-MaxIP	496.15		7	20.1	3.48259			20200930-S4-GPN-SH-V-14-100X1-P2-MaxIP	425.79		6	31.82	1.88561			20200830-S5-GPN-SH-P140-13-100X-S-MaxIP	364.7		10	21.42	4.66853
20200830-S6-GPN-CTRL-V-25-100-4Z-P1-MaxIP	714.1		15	31.97	4.6919			20200930-S4-GPN-SH-V-14-100X1-P3-MaxIP	381.74		11	34.15	3.22108			20200830-S5-GPN-SH-P140-13-100X-S2-MaxIP	605.18	432.832	14	31.4	4.4586	3.65978
20200830-S6-GPN-CTRL-V-24-100-4Z-P1.ics	550.52	589.112	15	32.51	4.61396	4.26282		20200930-S4-GPN-SH-V-14-100X1-S-MaxIP	365.83		6	34.11	1.75901			20200830-S5-GPN-SH-P140-14-100X-P1-MaxIP	300.06		9	66.68	1.34973
20200830-S6-GPN-CTRL-V-5-100X-P1-MaxIP	595.68		21	51.82	4.05249			20200930-S4-GPN-SH-V-14-100X1-S2-MaxIP	303.04		7	44.91	1.55867			20200830-S5-GPN-SH-P140-13-100X-S3-MaxIP	351.37		10	40.44	2.4728
								20200930-S4-GPN-SH-V-14-100X1-S3-MaxIP	461.11		6	33.19	1.80777			20200830-S5-GPN-SH-P140-14-100X-P-MaxIP	289.43		5	31.5	1.5873
								20200930-S4-GPN-SH-V-14-100X1-S4-MaxIP	405.21		3	31.73	0.945477			20200830-S5-GPN-SH-P140-14-100X-S-MaxIP	224.36		4	32.06	1.24766
								20200930-S4-GPN-SH-V-14-100X1-T-MaxIP	199.11		5	39.33	1.27129			20200830-S5-GPN-SH-P140-14-100X-S4-MaxIP	210.04	275.052	7	41.41	1.69041	1.66958
								20200930-S4-GPN-SH-V-14-100X1-T1-MaxIP	292.31		6	31.38	1.91205			20200830-S5-GPN-SH-P140-15-100X-P1-MaxIP	284.15		5	31.47	1.58881
								20200930-S4-GPN-SH-V-14-100X1-T4-MaxIP	280.66	339.285	4	31.57	1.26703	1.81374		20200830-S5-GPN-SH-P140-15-100X-P1-MaxIP	354.5		7	31.31	2.23571
								20200930-S4-GPN-SH-V-15-100X-P-MaxIP	249.9		4	41.14	0.97229			20200830-S5-GPN-SH-P140-15-100X-S2.ics	194.96	277.87	2	30.87	0.647878	1.4908
								20200930-S4-GPN-SH-V-14-100X1-T3-MaxIP	269.42		8	66.73	1.19886			20200830-S5-GPN-SH-P140-16-100X-P2-MaxIP	359.81		6	49.74	1.20627
								20200930-S4-GPN-SH-V-15-100X-S1-MaxIP	238.38		2	32.88	0.608273			20200830-S5-GPN-SH-P140-16-100X-P-MaxIP	346.22		9	27.9	3.22581
								20200930-S4-GPN-SH-V-15-100X-T-MaxIP	140.18		3	31.01	0.96743			20200830-S5-GPN-SH-P140-16-100X-P1-MaxIP	337.88		16	48.67	3.28745
								20200930-S4-GPN-SH-V-15-100X-T1-MaxIP	186.18	216.812	2	29.04	0.688705	0.887112		20200830-S5-GPN-SH-P140-16-100X-S-MaxIP	253.57		6	32.84	1.82704
								20200930-S4-GPN-SH-V-16-100X-P-MinIP	140.3		11	71.43	1.53997			20200830-S5-GPN-SH-P140-16-100X-S2-MaxIP	476.07		10	32.31	3.09502
								20200930-S4-GPN-SH-V-16-100X-P1-MaxIP	306.98		7	63.01	1.11093			20200830-S5-GPN-SH-P140-16-100X-S4-MaxIP	244.79		6	31.57	1.90054
								20200930-S4-GPN-SH-V-16-100X-S-MaxIP	404.74		11	31.96	3.4418			20200830-S5-GPN-SH-P140-16-100X-T-MaxIP	257.74	325.154	8	40.03	1.9985	2.36295
								20200930-S4-GPN-SH-V-16-100X-S1-MaxIP	375.62		7	32.3	2.16718			20200830-S5-GPN-SH-P140-17-100X-P-MaxIP	401.95		14	31.85	4.3956
								20200930-S4-GPN-SH-V-16-100X-S2-MaxIP	331.25		7	32.13	2.17865			20200830-S5-GPN-SH-P140-17-100X-P1-MaxIP	488.62		7	31.69	2.2089
								20200930-S4-GPN-SH-V-16-100X-S3-MaxIP	406.97		8	35.07	2.28115			20200830-S5-GPN-SH-P140-17-100X-P2-MaxIP	418.08	436.217	11	31.47	3.49539
								20200930-S4-GPN-SH-V-16-100X-T-MaxIP	420.67		5	31.95	1.56495			20200830-S5-GPN-SH-P140-19-100X-S-MaxIP	217.55		4	34.35	1.16448
								20200930-S4-GPN-SH-V-16-100X-T1-MaxIP	312.03	337.32	13	50.68	2.56511	2.10622		20200830-S5-GPN-SH-P140-17-100X-S-MaxIP	288.11		10	31.7	3.15457
								20200930-S4-GPN-SH-V-17-100X-P-MaxIP	266.3		8	36.82	2.17273			20200830-S5-GPN-SH-P140-17-100X-S1-MaxIP	275.33		6	31.4	1.91083
								20200930-S4-GPN-SH-V-17-100X-P1-MaxIP	258.22		5	70.21	0.712149			20200830-S5-GPN-SH-P140-17-100X-S2-MaxIP	278.92		12	50.59	2.37201	2.67168
								20200930-S4-GPN-SH-V-17-100X-P3-MaxIP	206.43		3	35.45	0.846262			20200830-S5-GPN-SH-P140-18-100X-P-MaxIP	313.19		10	31.93	3.13185
								20200930-S4-GPN-SH-V-17-100X-S-MaxIP	313.83		7	39.68	1.76411			20200830-S5-GPN-SH-P140-18-100X-S-MaxIP	329.2		11	34.27	3.2098	3.17083
								20200930-S4-GPN-SH-V-17-100X-S1-MaxIP	241.09		7	31.55	2.2187			20200830-S5-GPN-SH-P140-19-100X-P-MaxIP	284.65		10	31.69	3.15557
								20200930-S4-GPN-SH-V-17-100X-T-MaxIP	269.22	259.182	2	32.59	0.613685	1.38794		20200830-S5-GPN-SH-P140-19-100X-P1-MaxIP	216.02		9	32.42	2.77606
								20200930-S4-GPN-SH-V-20-100X-P2-MaxIP	328.27		3	25.87	1.15964			20200830-S5-GPN-SH-P140-19-100X-S2-MaxIP		275.371	8	32.39	2.4699	2.80051
								20200930-S4-GPN-SH-V-20-100X-P-MaxIP	377.04		2	31.68	0.631313			20200830-S5-GPN-SH-P140-20-100X-P-MaxIP	266.47		9	31.72	2.83733
								20200930-S4-GPN-SH-V-20-100X-P1-MaxIP	251.94	319.083	1	28.76	0.347705	0.712888		20200830-S5-GPN-SH-P140-20-100X-P3-MaxIP	339.86		5	31.15	1.60514
								20200930-S4-GPN-SH-V-18-100X-P1-MaxIP	477.41		9	77.44	1.16219			20200830-S5-GPN-SH-P140-22-100X-F1-MaxIP	362.7		9	33.2	2.71084
								20200930-S4-GPN-SH-V-18-100X-P-MaxIP	347.12		5	31.88	1.56838			20200830-S5-GPN-SH-P140-20-100X-P2.ics	328.39		7	26.82	2.60999
								20200930-S4-GPN-SH-V-18-100X-S-MaxIP	335.19		2	27.62	0.724113			20200830-S5-GPN-SH-P140-20-100X-P3-MaxIP	333.62		6	31.5	1.90476
								20200930-S4-GPN-SH-V-18-100X-S1-MaxIP	261.25	355.243	4	30	1.33333	1.197		20200830-S5-GPN-SH-P140-20-100X-S-MaxIP	283.99		8	34.04	2.35018
								20200930-S4-GPN-SH-V-21-100X-P-MaxIP	468.28		11	54.99	2.00036			20200830-S5-GPN-SH-P140-20-100X-S2-MaxIP	294.7	315.676	12	32.2	3.72671	2.53499
								20200930-S4-GPN-SH-V-21-100X-P1-MaxIP	365.19		8	27.62	2.89645			20200830-S5-GPN-SH-P140-21-100X-P-MaxIP	332		7	32.58	2.14856
								20200930-S4-GPN-SH-V-21-100X-P3-MaxIP	568.93		14	31.79	4.4039			20200830-S5-GPN-SH-P140-21-100X-P1-MaxIP	384.56		13	30.36	4.28195
								20200930-S4-GPN-SH-V-21-100X-S2-MaxIP	298.48		9	64.97	1.38525			20200830-S5-GPN-SH-P140-21-100X-P2-MaxIP	302.54	339.7	7	32.03	2.18545
								20200930-S4-GPN-SH-V-21-100X-S3-MaxIP	302.84		9	31.98	2.81426			20200830-S5-GPN-SH-P140-22-100X-F-MaxIP	358.14		12	32.35	3.70943
								20200930-S4-GPN-SH-V-21-100X-T1.ics	152.36	359.347	3	32.67	0.918274	2.40308		20200830-S5-GPN-SH-P140-22-100X-P-MaxIP	355.74		7	31.63	2.21309
								20200930-S4-GPN-SH-V-22-100X-P-MaxIP	435.98		7	38.98	1.79579			20200830-S5-GPN-SH-P140-22-100X-P1-MaxIP	285.48		6	31.29	1.91755
								20200930-S4-GPN-SH-V-22-100X-S-MaxIP	513.32		6	30.35	1.97694			20200830-S5-GPN-SH-P140-22-100X-P2-MaxIP	237.54		15	56.92	2.63528
								20200930-S4-GPN-SH-V-22-100X-S1-MaxIP	344.48	431.26	7	31.56	2.218	1.99691		20200830-S5-GPN-SH-P140-22-100X-S-MaxIP	232.8		11	32.06	3.43107
																20200830-S5-GPN-SH-P140-22-100X-S-MaxIP	260.93		9	31.94	2.81778
																20200830-S5-GPN-SH-P140-22-100X-S1-MaxIP 1	256.44		14	48.85	2.86592
																20200830-S5-GPN-SH-P140-22-100X-S2-MaxIP	299.72		7	31.62	2.21379
																20200830-S5-GPN-SH-P140-22-100X-S3-MaxIP	292.99		6	29.9	2.00669
																20200830-S5-GPN-SH-P140-22-100X-T-MaxIP	313.25		14	31.31	4.47141
																20200830-S5-GPN-SH-P140-22-100X-T1-MaxIP	348.82		7	32.55	2.15054
																20200830-S5-GPN-SH-P140-22-100X-Tids-MaxIP	269.37		11	31.09	3.53812
																20200830-S5-GPN-SH-P140-22-100X-Tids1-MinIP	56.5	274.44	5	30.62	1.63292	2.73874
																20200830-S5-GPN-SH-P140-23-100X-P3-MaxIP	414.73		11	31.64	3.47661
																20200830-S5-GPN-SH-P140-23-100X-P-MaxIP	436.19		12	57.43	2.0895
																20200830-S5-GPN-SH-P140-23-100X-P1-MaxIP	374.09		9	30.42	2.95858
																20200830-S5-GPN-SH-P140-23-100X-P2-MaxIP	352.59		8	31.83	2.51335
																20200830-S5-GPN-SH-P140-23-100X-S1-MaxIP	377.1		8	31.89	2.50862
																20200830-S5-GPN-SH-P140-23-100X-S2-MaxIP	232.98	364.613	6	33.92	1.76887	2.55259
																20200830-S5-GPN-SH-P140-24-100X-P-MaxIP	369.08		11	31.68	3.47222
																20200830-S5-GPN-SH-P140-24-100X-P-MaxIP	382.23		9	32.05	2.80811
																20200830-S5-GPN-SH-P140-24-100X-P1-MaxIP	372.58		12	32.23	3.72324
																20200830-S5-GPN-SH-P140-24-100X-S1-MaxIP	335.67		5	31.08	1.60875
																20200830-S5-GPN-SH-P140-24-100X-S2-MaxIP	406.96	373.304	11	31.68	3.47222
																20200830-S5-GPN-SH-P140-25-100X-P-MaxIP	391.18		16	66.13	2.41948
																20200830-S5-GPN-SH-P140-24-100X-T-MaxIP	204.77		8	32.34	2.47372	2.85396
																20200830-S5-GPN-SH-P140-26-100X-P-MaxIP	354.8		12	43.98	2.72851
																20200830-S5-GPN-SH-P140-26-100X-S1-MaxIP	392.86		23	51.55	4.46169
																20200830-S5-GPN-SH-P140-26-100X-T-MaxIP	336.62	336.046	15	32.56	4.60688	3.93236
																					2.83037

## Sheet: Fig 6-s1E
Mean intensity										Numebr
GFP- CTRL	GFP-shp140Cap	Cre-CTRL	Cre-shp140Cap	average	GFP- CTRL	GFP-shp140Cap	Cre- CTRL	Cre-shp140Cap		GFP- CTRL	GFP-shp140Cap	Cre- CTRL	Cre-shp140Cap	average	GFP- CTRL	GFP-shp140Cap	Cre- CTRL	Cre-shp140Cap
653.837	567.29	485.632	487.268	456.546	1.43214	1.24257	1.06371	1.06729		5.76611	5.45316	2.20962	2.14122	2.91564	1.97765	1.87031	0.757851	0.734391
474.384	404.445	454.323	412.132	456.546	1.03907	0.885879	0.995131	0.902718		4.39562	4.93702	2.03641	2.13203	2.91564	1.5076	1.69329	0.698445	0.731238
452.652	559.541	421.567	411.668	456.546	0.991472	1.2256	0.923382	0.9017		2.90853	3.96617	1.82094	1.73634	2.91564	0.997562	1.36031	0.624543	0.595525
439.49	538.822	415.064	404.02	456.546	0.962641	1.18021	0.90914	0.884948		2.71813	3.54437	1.70879	1.50362	2.91564	0.932258	1.21564	0.586076	0.51571
436.633	524.945	402.644	382.347	456.546	0.956383	1.14982	0.881934	0.837477		2.31598	3.34635	1.58569	1.4421	2.91564	0.79433	1.14772	0.543857	0.494609
425.805	453.718	377.409	360.86	456.546	0.932665	0.993806	0.82666	0.790413		2.27717	3.30189	1.58046	1.39119	2.91564	0.78102	1.13248	0.542062	0.477149
420.825	449.062	343.676	348.839	456.546	0.921758	0.983606	0.752774	0.764082		2.26704	2.9356	1.5678	1.28432	2.91564	0.777546	1.00685	0.53772	0.440495
417.326	443.539	339.23	344.618	456.546	0.914095	0.971511	0.743036	0.754838		1.87066	2.87395	1.31544	1.17237	2.91564	0.641596	0.985702	0.451167	0.402095
387.962	420.445	322.315	339.254	456.546	0.849777	0.920926	0.705985	0.743089		1.72151	2.57441	0.897068	0.94208	2.91564	0.59044	0.882967	0.307674	0.323113
456.546	403.746	294.137	335.243	456.546	1	0.884348	0.644265	0.734302		2.91564	1.92856	0.878404	0.923166	2.91564	1	0.661453	0.301273	0.316626
	359.873	226.252	323.577	456.546		0.788251	0.495573	0.70875			1.89327	0.782022	0.797742	2.91564		0.649351	0.268216	0.273608
	335.632			456.546		0.735154					1.73171	0.646768		2.91564		0.593937	0.221827
638.015	432.564	555.977	551.381	500.974	1.27355	0.863446	1.10979	1.10062		4.53915	3.48283	6.72999	4.98997	3.58368	1.26662	0.971858	1.87795	1.39241
525.783	428.504	478.747	492.693	500.974	1.04952	0.855342	0.955631	0.98347		4.39989	2.56027	3.04681	4.28556	3.58368	1.22776	0.714423	0.85019	1.19585
524.129	423.69	477.473	464.361	500.974	1.04622	0.845733	0.953088	0.926915		4.34141	2.27682	2.78134	4.05532	3.58368	1.21144	0.635329	0.776112	1.13161
523.802	422.423	470.01	440.019	500.974	1.04557	0.843202	0.938192	0.878326		4.23195	2.1789	2.32972	3.21705	3.58368	1.18089	0.608005	0.650092	0.897692
522.78	417.333	467.382	429.629	500.974	1.04353	0.833043	0.932947	0.857587		4.11211	2.00195	2.01524	3.1277	3.58368	1.14745	0.558629	0.562338	0.872761
507.796	400.136	452.321	410.962	500.974	1.01362	0.798716	0.902882	0.820324		3.88391	1.99511	1.69301	2.91894	3.58368	1.08378	0.556719	0.472423	0.814508
499.343	397.26	424.708	400.428	500.974	0.996743	0.792975	0.847764	0.799298		3.4257	1.75242	1.52373	2.16758	3.58368	0.955915	0.488999	0.425187	0.604847
470.2	339.077	375.776	362.128	500.974	0.938571	0.676836	0.75009	0.722847		3.31092	1.69314	1.29871	1.40546	3.58368	0.923887	0.472457	0.362395	0.392184
448.835	323.67	324.877	349.594	500.974	0.895923	0.64608	0.64849	0.697829		2.92828	1.62921	1.18198	1.03623	3.58368	0.817115	0.454618	0.329822	0.289152
447.561				500.974	0.89338					2.67157				3.58368	0.745482
402.475				500.974	0.803385					1.57562				3.58368	0.439664
500.974				500.974	1					3.58368				3.58368	1
732.787	523.359	541.22	470.238	575.122	1.27414	0.909996	0.941053	0.817631		14.2197	4.47475	3.81756	7.25915	6.59534	2.15602	0.678472	0.578827	1.10065
700.78	505.751	497.966	459.82	575.122	1.21849	0.87938	0.865844	0.799518		7.72176	4.34401	2.34117	2.90804	6.59534	1.17079	0.658648	0.354973	0.440924
599.279	496.061	376.109	418.941	575.122	1.042	0.862531	0.653964	0.728439		7.42526	4.15335	0.951445	2.70068	6.59534	1.12584	0.62974	0.14426	0.409483
555.106	492.844		383.988	575.122	0.965197	0.856939		0.667663		4.94908	2.90326		2.05614	6.59534	0.750391	0.440199		0.311757
530.748	492.824		361.683	575.122	0.922844	0.856904		0.628881		4.57357	2.85345		1.35025	6.59534	0.693455	0.432646		0.204728
505.461	452.385		320.277	575.122	0.878876	0.786589		0.556885		4.29286	2.75127		1.01081	6.59534	0.650894	0.417153		0.153261
401.693	450.9			575.122	0.698449	0.784008				2.98516	2.3859			6.59534	0.452617	0.361756
575.122				575.122	1					6.59534				6.59534	1
