# Supplementary material for: Endophilin A1 facilitates organization of the GABAergic postsynaptic machinery to maintain excitation-inhibition balance
Source: eLife. 2025 Oct 2;13:RP102792. doi: 10.7554/eLife.102792 (PMC12490859; doi:10.7554/eLife.102792)
Supplement: Figure 6—source data 1. [file elife-102792-fig6-data1.xlsx]

## Sheet: Fig 6B_Raw data and normalize 
Source data
Ctrl_GPN									LatA_GPN									Noco_GPN										Ctrl_PSD95									LatA_PSD95									Noco_PSD95
Source	intensity	intensity of per neuron	number	length	puncta number of per 10 μm	puncta number of per neuron			Source	intensity	intensity of per neuron	number	length	puncta number of per 10 μm	puncta number of per neuron			Source	intensity	intensity of per neuron	number	length	puncta number of per 10 μm	puncta number of per neuron				Source	intensity	intensity of per neuron	number	length	puncta number of per 10 μm	puncta number of per neuron			Source	intensity	intensity of per neuron	number	length	puncta number of per 10 μm	puncta number of per neuron			Source	intensity	intensity of per neuron	number
MAX_2022.10.18-ctrl-13-T-1.nd2:0001-0479-0512	356.678		30	70.098	4.27972				MAX_2022.10.18-Noco-1-F-1.nd2:0001-0512-0556	446.989		15	33.858	4.43027				MAX_2022.10.18-Noco-1-F-1.nd2:0001-0512-0524	441.496		16	34.224	4.67508					MAX_2022.10.18-ctrl-13-T-2.nd2:0001-0479-0512	653.949		28	66.583	4.20528				MAX_2022.10.18-Noco-1-F-1.nd2:0001-0512-0556	492.235		18	33.858	5.31632				MAX_2022.10.18-Noco-1-F-1.nd2:0001-0512-0524	496.554		13
MAX_2022.10.18-ctrl-13-S-1.nd2:0001-0509-0531	716.216		33	31.558	10.4569				MAX_2022.10.18-Noco-1-F1-1.nd2:0001-0512-0581	458.524		28	33.191	8.43602				MAX_2022.10.18-Noco-1-F1-1.nd2:0001-0512-0582	470.847		21	33.206	6.32416					MAX_2022.10.18-ctrl-13-S-2.nd2:0001-0509-0531	1182.52		45	31.558	14.2595				MAX_2022.10.18-Noco-1-F1-1.nd2:0001-0512-0581	703.245		16	33.191	4.82058				MAX_2022.10.18-Noco-1-F1-1.nd2:0001-0512-0582	707.094		21
MAX_2022.10.18-ctrl-13-P1-1.nd2:0001-0292-0512	711.22		32	32.312	9.90344				MAX_2022.10.18-Noco-1-P-1.nd2:0001-0519-0512	569.16		152	31.568	48.15				MAX_2022.10.18-Noco-1-P-1.nd2:0001-0519-0512	568.597		152	31.111	48.8573					MAX_2022.10.18-ctrl-13-P1-1.nd2:0001-0292-0512	964.506		37	32.312	11.4509				MAX_2022.10.18-Noco-1-P-2.nd2:0001-0519-0512	639.086		12	31.568	3.80132				MAX_2022.10.18-Noco-1-P-1.nd2:0001-0519-0512	640.036		15
MAX_2022.10.18-ctrl-13-P-1.nd2:0001-0512-0443	714.256		55	31.601	17.4045				MAX_2022.10.18-Noco-1-P1-1.nd2:0001-0512-0627	505.92		68	64.936	10.4718				MAX_2022.10.18-Noco-1-P1-1.nd2:0001-0512-0627	505.92		68	63.967	10.6305					MAX_2022.10.18-ctrl-13-P-1.nd2:0001-0512-0443	1198.83		33	31.601	10.4427				MAX_2022.10.18-Noco-1-P1-1.nd2:0001-0512-0627	704.47		31	64.936	4.77393				MAX_2022.10.18-Noco-1-P1-1.nd2:0001-0512-0627	704.47		36
MAX_2022.10.18-ctrl-13-F-1.nd2:0001-0512-0521	776.004	654.875	46	32.025	14.3638	11.2817			MAX_2022.10.18-Noco-1-S-1.nd2:0001-0499-0510	478.748		57	31.285	18.2196				MAX_2022.10.18-Noco-1-S-1.nd2:0001-0506-0542	478.882	493.148	58	32.139	18.0466	17.7067				MAX_2022.10.18-ctrl-13-F-1.nd2:0001-0512-0521	1165.66	1033.09	25	32.025	7.8064	9.63294			MAX_2022.10.18-Noco-1-S-1.nd2:0001-0499-0510	568.141		44	31.285	14.0642				MAX_2022.10.18-Noco-1-S-1.nd2:0001-0506-0542	578.545	625.34	19
MAX_2022.10.18-ctrl-12S-1.nd2:0001-0451-0512	465.269		64	50.604	12.6472				MAX_2022.10.18-Noco-1-T-1.nd2:0001-0512-0476	535.642	499.164	21	33.502	6.26828	15.996			MAX_2022.10.18-Noco-2-P-1.nd2:0001-0512-0482	480.347		34	31.813	10.6875					MAX_2022.10.18-ctrl-12S-1.nd2:0001-0451-0512	757.373		36	50.604	7.11406				MAX_2022.10.18-Noco-1-T-1.nd2:0001-0512-0476	774.006	646.864	30	33.502	8.95469	6.95518			MAX_2022.10.18-Noco-2-P-1.nd2:0001-0512-0482	1080.97		36
MAX_2022.10.18-ctrl-12-T1-1.nd2:0001-0512-0539	615.476		27	32.451	8.32024				MAX_2022.10.18-Noco-2-P-1.nd2:0001-0512-0395	482.586		38	32.75	11.6031				MAX_2022.10.18-Noco-2-S-1.nd2:0001-0455-0512	554.16		19	32.161	5.90778					MAX_2022.10.18-ctrl-12-T1-1.nd2:0001-0512-0539	1303.77		21	32.451	6.4713				MAX_2022.10.18-Noco-2-P-1.nd2:0001-0512-0395	1085.02		41	32.75	12.5191				MAX_2022.10.18-Noco-2-S-2.nd2:0001-0455-0512	1153.24		22
MAX_2022.10.18-ctrl-12-T-1.nd2:0001-0512-0529	484.073		30	32.396	9.2604				MAX_2022.10.18-LatA-2-P1-1.nd2:0001-0512-0561	366.531	424.558	35	32.989	10.6096	11.1063			MAX_2022.10.18-Noco-2-T-1-1.nd2:0001-0481-0512	409.887	481.465	26	30.898	8.41478	8.33667				MAX_2022.10.18-ctrl-12-T-1.nd2:0001-0512-0529	744.66		16	32.396	4.93888	6.17475			MAX_2022.10.18-LatA-2-P1-1.nd2:0001-0512-0561	556	820.51	22	32.989	6.66889	9.59399			MAX_2022.10.18-Noco-2-T-1.nd2:0001-0475-0512	1414.54	1216.25	28
MAX_2022.10.18-ctrl-12-S-1.nd2:0001-0512-0484	588.09		39	32.561	11.9775				MAX_2022.10.18-LatA-4-F-1.nd2:0001-0512-0499	338.891		12	31.378	3.82434				MAX_2022.10.18-Noco-3-P-1.nd2:0001-0512-0378	555.02		61	31.638	19.2806					MAX_2022.10.18-ctrl-12-S-1.nd2:0001-0512-0484	1220.7		35	32.561	10.7491				MAX_2022.10.18-LatA-4-F-1.nd2:0001-0512-0499	632.538		22	31.378	7.01128	7.01128			MAX_2022.10.18-Noco-3-P-1.nd2:0001-0512-0378	914.252		41
MAX_2022.10.18-ctrl-12-P-1.nd2:0001-0680-0512	448.117		51	62.418	8.17072				MAX_2022.10.18-LatA-4-P-1.nd2:0001-0575-0513	476.499		36	32.707	11.0068				MAX_2022.10.18-Noco-3-S-1.nd2:0001-0495-0512	654.699	604.86	27	30.254	8.92444	14.1025				MAX_2022.10.18-ctrl-12-P-2.nd2:0001-0680-0512	846.051		40	110.198	3.62983				MAX_2022.10.18-LatA-4-P-1.nd2:0001-0575-0513	796.474		24	32.707	7.33788				MAX_2022.10.18-Noco-3-S-1.nd2:0001-0495-0512	516.902	715.577	32
MAX_2022.10.18-ctrl-12-F-1.nd2:0001-0587-0512	542.295	523.887	22	31.559	6.97107	9.55786			MAX_2022.10.18-LatA-4-S-1.nd2:0001-0586-0512	571.075		40	31.503	12.6972				MAX_2022.10.18-Noco-4-F-1.nd2:0001-0512-0617	560.494		30	33.681	8.9071					MAX_2022.10.18-ctrl-12-F-2.nd2:0001-0587-0512	1038.48	1030.73	43	31.559	13.6253	7.75473			MAX_2022.10.18-LatA-4-P-1.nd2:0001-0575-0513	796.474								MAX_2022.10.18-Noco-4-F-1.nd2:0001-0512-0617	757.114		29
MAX_2022.10.18-ctrl-11-T-1.nd2:0001-0512-0571	579.528		49	32.278	15.1806				MAX_2022.10.18-LatA-4-T-1.nd2:0001-0512-0652	309.166	423.908	13	35.143	3.69917	7.80688			MAX_2022.10.18-Noco-4-F1-1.nd2:0001-0512-0412	551.262		19	31.747	5.98482					MAX_2022.10.18-ctrl-11-T-1.nd2:0001-0512-0571	756.346		23	32.278	7.1256				MAX_2022.10.18-LatA-4-S-1.nd2:0001-0586-0512	1238.45		17	31.503	5.39631				MAX_2022.10.18-Noco-4-F1-1.nd2:0001-0512-0412	929.722		26
MAX_2022.10.18-ctrl-11-S-1.nd2:0001-0512-0524	547.201		60	31.62	18.9753				MAX_2022.10.18-LatA-5-P-1.nd2:0001-0327-0512	356.532		20	62.193	3.2158				MAX_2022.10.18-Noco-4-P-1.nd2:0001-0512-0564	452.391		69	31.246	22.0828					MAX_2022.10.18-ctrl-11-S-1.nd2:0001-0512-0524	962.134		41	31.62	12.9665				MAX_2022.10.18-LatA-4-T-1.nd2:0001-0512-0652	504.468	793.681	25	35.143	7.11379	6.61599			MAX_2022.10.18-Noco-4-P-1.nd2:0001-0512-0556	1137.76		24
MAX_2022.10.18-ctrl-11-P-1.nd2:0001-0512-0557	483.258	536.662	54	30.93	17.4588	17.2049			MAX_2022.10.18-LatA-5-S-1.nd2:0001-0588-0512	345.72	351.126	12	35.295	3.39992	3.30786			MAX_2022.10.18-Noco-4-S-1.nd2:0001-0512-0556	746.256		49	31.601	15.5058					MAX_2022.10.18-ctrl-11-P-1.nd2:0001-0512-0557	1067.59	928.691	46	30.93	14.8723	11.6548			MAX_2022.10.18-LatA-5-P-1.nd2:0001-0327-0512	482.898		10	62.193	1.6079				MAX_2022.10.18-Noco-4-S-1.nd2:0001-0512-0556	959.708		21
MAX_2022.10.18-ctrl-10-T1-1.nd2:0001-0348-0512	664.099		30	34.142	8.78683				MAX_2022.10.18-LatA-6-F-1.nd2:0001-0512-0569	485.391		15	32.125	4.66926				MAX_2022.10.18-Noco-4-T-1.nd2:0001-0512-0503	461.91	554.463	19	30.946	6.13973	11.7241				MAX_2022.10.18-ctrl-10-T1-1.nd2:0001-0348-0512	875.038		30	34.142	8.78683				MAX_2022.10.18-LatA-5-S-2.nd2:0001-0588-0512	587.759	535.328	15	35.295	4.24989	2.9289			MAX_2022.10.18-Noco-4-T-1.nd2:0001-0512-0503	832.879	923.437	17
MAX_2022.10.18-ctrl-10-T-1.nd2:0001-0475-0512	762.24		36	32.103	11.2139				MAX_2022.10.18-LatA-6-P-1.nd2:0001-0512-0552	631.883		57	31.966	17.8314				MAX_2022.10.18-Noco-5-P-1.nd2:0001-0512-0633	583.855		22	31.622	6.95718					MAX_2022.10.18-ctrl-10-T-1.nd2:0001-0475-0512	894.557		36	32.103	11.2139				MAX_2022.10.18-LatA-6-F-2.nd2:0001-0512-0569	887.598		21	32.125	6.53696				MAX_2022.10.18-Noco-5-P-2.nd2:0001-0512-0633	810.498		14
MAX_2022.10.18-ctrl-10-S1-1.nd2:0001-0511-0542	688.154		49	31.248	15.681				MAX_2022.10.18-LatA-6-S-1.nd2:0001-0533-0447	514.175		23	28.661	8.02484				MAX_2022.10.18-Noco-5-S-1.nd2:0001-0512-0610	455.957	519.906	9	31.026	2.90079	4.92899				MAX_2022.10.18-ctrl-10-S1-1.nd2:0001-0511-0542	797.831		44	31.248	14.0809				MAX_2022.10.18-LatA-6-P-1.nd2:0001-0512-0552	1183.26		38	31.966	11.8876				MAX_2022.10.18-Noco-5-S-1.nd2:0001-0512-0610	574.829	692.663	18
MAX_2022.10.18-ctrl-10-S-1.nd2:0001-0511-0503	683.461		79	32.203	24.5319				MAX_2022.10.18-LatA-6-S1-1.nd2:0001-0512-0759	403.025		16	31.964	5.00563				MAX_2022.10.18-Noco-6-F-1.nd2:0001-0512-0457	677.712		25	32.279	7.74497					MAX_2022.10.18-ctrl-10-S-1.nd2:0001-0511-0503	666.699		23	32.203	7.14219				MAX_2022.10.18-LatA-6-S-1.nd2:0001-0533-0447	973.441		35	28.661	12.2117				MAX_2022.10.18-Noco-6-F-2.nd2:0001-0512-0457	1068.24		18
MAX_2022.10.18-ctrl-10-P-1.nd2:0001-0512-0554	906.022	740.795	44	31.447	13.9918	14.8411			MAX_2022.10.18-LatA-6-T-1.nd2:0001-0512-0596	497.881	506.471	19	31.345	6.06157	8.31855			MAX_2022.10.18-Noco-6-P-1.nd2:0001-0496-0512	501.974		35	32.622	10.729					MAX_2022.10.18-ctrl-10-P-1.nd2:0001-0512-0554	884.702	823.765	27	31.447	8.58587	9.96194			MAX_2022.10.18-LatA-6-S1-1.nd2:0001-0512-0759	700.832		27	31.964	8.447				MAX_2022.10.18-Noco-6-P-1.nd2:0001-0496-0512	1237.55		32
MAX_2022.10.18-ctrl-9-S1-1.nd2:0001-0512-0585	503.689		42	27.918	15.0441				MAX_2022.10.18-LatA-7-P-1.nd2:0001-0512-0491	528.206		50	31.84	15.7035				MAX_2022.10.18-Noco-6-S-1.nd2:0001-0512-0511	623.853	601.18	33	31.954	10.3273	9.60042				MAX_2022.10.18-ctrl-9-S1-1.nd2:0001-0512-0585	435.697		8	27.918	2.86553				MAX_2022.10.18-LatA-6-T-1.nd2:0001-0512-0596	970.294	943.086	28	31.345	8.93284	9.60323			MAX_2022.10.18-Noco-6-S-1.nd2:0001-0512-0511	1181.77	1162.52	19
MAX_2022.10.18-ctrl-9-S-1.nd2:0001-0512-0431	431.116		21	33.822	6.20898				MAX_2022.10.18-LatA-7-P1-1.nd2:0001-0527-0512	589.603		34						MAX_2022.10.18-Noco-7-F-1.nd2:0001-0512-0443	697.942		37	31.675	11.6811					MAX_2022.10.18-ctrl-9-S-1.nd2:0001-0512-0431	531.31		18	33.822	5.32198				MAX_2022.10.18-LatA-7-P-1.nd2:0001-0512-0491	973.473		35	31.84	10.9925				MAX_2022.10.18-Noco-7-F-1.nd2:0001-0512-0306	1074.63		33
MAX_2022.10.18-ctrl-9-P1-1.nd2:0001-0487-0512	632.083		44	32.031	13.7367				MAX_2022.10.18-LatA-7-S-1.nd2:0001-0559-0555	598.368		31	32.249	9.6127				MAX_2022.10.18-Noco-7-P-1.nd2:0001-0512-0437	521.398		77	38.541	19.9787					MAX_2022.10.18-ctrl-9-P1-1.nd2:0001-0487-0512	687.877		27	32.031	8.42933				MAX_2022.10.18-LatA-7-P1-1.nd2:0001-0527-0512	1169.65		38	31	12.2581				MAX_2022.10.18-Noco-7-P-1.nd2:0001-0512-0437	903.659		76
MAX_2022.10.18-ctrl-9-P-1.nd2:0001-0512-0512	581.52	537.102	86	87.068	9.87734	11.2168			MAX_2022.10.18-LatA-7-S1-1.nd2:0001-0512-0558	507.175		36	31.414	11.4599				MAX_2022.10.18-Noco-7-S-1.nd2:0001-0512-0543	623.757		68	30.961	21.9631					MAX_2022.10.18-ctrl-9-P-1.nd2:0001-0512-0512	606.461	565.336	56	87.068	6.43175	5.76215			MAX_2022.10.18-LatA-7-S-1.nd2:0001-0559-0555	942.508		28	32.249	8.68244				MAX_2022.10.18-Noco-7-S-1.nd2:0001-0512-0543	850.212		37
MAX_2022.10.18-ctrl-8-S-1.nd2:0001-0512-0417	502.479		57	60	9.5				MAX_2022.10.18-LatA-7-T-1.nd2:0001-0573-0512	470.834		23	30.944	7.43278				MAX_2022.10.18-Noco-7-T-1.nd2:0001-0504-0512	957.734	700.208	44	31.197	14.1039	16.9317				MAX_2022.10.18-ctrl-8-S-1.nd2:0001-0512-0417	747.075		40	60	6.66667				MAX_2022.10.18-LatA-7-S1-1.nd2:0001-0512-0558	876.519		29	31.414	9.23155				MAX_2022.10.18-Noco-7-T-1.nd2:0001-0504-0512	1500.15	1082.16	17
MAX_2022.10.18-ctrl-8-P-1.nd2:0001-0512-0543	503.65		36	32.011	11.2461				MAX_2022.10.18-LatA-7-T1-1.nd2:0001-0512-0622	612.709	551.149	36	32.058	11.2296	11.0877			MAX_2022.10.18-Noco-8-P-1.nd2:0001-0512-0553	681.316		36	31.587	11.3971					MAX_2022.10.18-ctrl-8-P-1.nd2:0001-0512-0543	950.208		60	32.011	18.7436				MAX_2022.10.18-LatA-7-T-1.nd2:0001-0573-0512	883.533		25	30.944	8.07911				MAX_2022.10.18-Noco-8-P-2.nd2:0001-0512-0553	865.838		18
MAX_2022.10.18-ctrl-8-F-1.nd2:0001-0502-0560	485.158	497.096	35	31.062	11.2678	10.6713			MAX_2022.10.18-LatA-8-F-1.nd2:0001-0512-0510	261.706		6	36.031	1.66523				MAX_2022.10.18-Noco-8-S-1.nd2:0001-0512-0486	489.073		20	31.43	6.36335					MAX_2022.10.18-ctrl-8-F-1.nd2:0001-0502-0560	874.73	857.338	32	31.062	10.302	11.9041			MAX_2022.10.18-LatA-7-T1-1.nd2:0001-0512-0622	1084.13	988.303	39	32.058	12.1655	10.2348			MAX_2022.10.18-Noco-8-S-1.nd2:0001-0512-0486	545.518		15
MAX_2022.10.18-ctrl-7-T-2.nd2:0001-0592-0504	394.547		24	36.479	6.57913				MAX_2022.10.18-LatA-8-P-1.nd2:0001-0512-0476	380.322		18	47.539	3.78636				MAX_2022.10.18-Noco-8-S1-1.nd2:0001-0540-0512	698.638	623.009	54	49.343	10.9438	9.56808				MAX_2022.10.18-ctrl-7-T-2.nd2:0001-0592-0504	781.707		37	36.479	10.1428				MAX_2022.10.18-LatA-8-F-1.nd2:0001-0512-0510	659.927		34	36.031	9.43632				MAX_2022.10.18-Noco-8-S1-1.nd2:0001-0540-0512	963.28	791.545	17
MAX_2022.10.18-ctrl-7-S1-1.nd2:0001-0512-0516	648.846		32	32.69	9.78893				MAX_2022.10.18-LatA-8-S-1.nd2:0001-0726-0512	303.549		12	31.444	3.81631				MAX_2022.10.18-Noco-9-P-1.nd2:0001-0514-0512	402.108		22	30.718	7.16192					MAX_2022.10.18-ctrl-7-S1-1.nd2:0001-0512-0516	1232.22		49	32.69	14.9893				MAX_2022.10.18-LatA-8-P-2.nd2:0001-0512-0476	1078.38		39	47.539	8.20379				MAX_2022.10.18-Noco-9-P-1.nd2:0001-0514-0512	696.927		21
MAX_2022.10.18-ctrl-7-S-1.nd2:0001-0618-0512	546.507		32	31.882	10.037				MAX_2022.10.18-LatA-8-S1-1.nd2:0001-0530-0512	339.012		16	62.978	2.54057				MAX_2022.10.18-Noco-9-S-1.nd2:0001-0512-0510	399.028	400.568	18	31.98	5.62852	6.39522				MAX_2022.10.18-ctrl-7-S-1.nd2:0001-0618-0512	1136.24		32	31.882	10.037	11.723			MAX_2022.10.18-LatA-8-S-1.nd2:0001-0726-0512	838.229		28	31.444	8.90472				MAX_2022.10.18-Noco-9-S-1.nd2:0001-0512-0510	739.049		27
MAX_2022.10.18-LatA-7-P1-1.nd2:0001-0367-0512	457.296		26	52.812	4.92312				MAX_2022.10.18-LatA-8-T-1.nd2:0001-0502-0512	319.965		7	30.89	2.26611				MAX_2022.10.18-Noco-10-P-1.nd2:0001-0497-0512	374.204		13	31.48	4.12961					MAX_2022.10.18-ctrl-7-P1-1.nd2:0001-0465-0534	1313.76		45	52.812	8.52079				MAX_2022.10.18-LatA-8-S1-1.nd2:0001-0530-0512	933.001		40	62.978	6.35142				MAX_2022.10.18-Noco-10-P-1.nd2:0001-0497-0512	668.351		55
MAX_2022.10.18-ctrl-7-P-1.nd2:0001-0512-0713	666.129		49	31.54	15.5358				MAX_2022.10.18-LatA-8-T1-1.nd2:0001-0521-0512	362.618	327.862	7	33.903	2.06471	2.68988			MAX_2022.10.18-Noco-10-P1-1.nd2:0001-0445-0512	323.052		14	31.647	4.4238					MAX_2022.10.18-ctrl-7-P-2.nd2:0001-0512-0713	1295.23		42	31.54	13.3164				MAX_2022.10.18-LatA-8-S1-1.nd2:0001-0530-0512	933.001								MAX_2022.10.18-Noco-10-P1-1.nd2:0001-0445-0512	731.784		30
MAX_2022.10.18-ctrl-7-F-1.nd2:0001-0512-0268	636.124	558.241	33	58.987	5.59445	8.74308			MAX_2022.10.18-LatA-9-P-1.nd2:0001-0528-0512	388.305		28	31.634	8.85124				MAX_2022.10.18-Noco-10-S-1.nd2:0001-0543-0512	398.716	365.324	11	31.027	3.5453	4.0329				MAX_2022.10.18-ctrl-7-F-1.nd2:0001-0512-0268	1371.53	1269.8	50	58.987	8.47644	10.9138			MAX_2022.10.18-LatA-8-T-2.nd2:0001-0502-0512	894.611		22	30.89	7.12205				MAX_2022.10.18-Noco-10-S-1.nd2:0001-0543-0512	811.132	737.089	21
MAX_2022.10.18-ctrl-6-T1-1.nd2:0001-0560-0512	837.878		66	64.488	10.2345				MAX_2022.10.18-LatA-9-S-1.nd2:0001-0512-0694	433.606		45	78.64	5.72228				MAX_2022.10.18-Noco-11-P-1.nd2:0001-0619-0512	396.616		29	65.115	4.45366					MAX_2022.10.18-ctrl-6-T1-1.nd2:0001-0560-0512	1643.57		47	64.488	7.28818				MAX_2022.10.18-LatA-8-T1-1.nd2:0001-0521-0512	898.598	890.821	17	33.903	5.01431	7.50543			MAX_2022.10.18-Noco-11-P-1.nd2:0001-0619-0512	832.358		68
MAX_2022.10.18-ctrl-6-T-1.nd2:0001-0560-0512	570.446		32	31.741	10.0816				MAX_2022.10.18-LatA-9-S1-1.nd2:0001-0430-0512	424.173		22	30.962	7.10548				MAX_2022.10.18-Noco-11-P1-1.nd2:0001-0721-0512	532.969		39	30.945	12.603					MAX_2022.10.18-ctrl-6-T-1.nd2:0001-0560-0512	1039.02		38	31.741	11.9719				MAX_2022.10.18-LatA-9-P-1.nd2:0001-0528-0512	796.563		26	31.634	8.219				MAX_2022.10.18-Noco-11-P1-1.nd2:0001-0721-0512	1115.42		30
MAX_2022.10.18-ctrl-6-S-1.nd2:0001-0483-0512	1193.46		16	64.465	2.48197				MAX_2022.10.18-LatA-9-T-1.nd2:0001-0475-0512	497.566	435.913	19	30.857	6.15744	6.95911			MAX_2022.10.18-Noco-11-S-1.nd2:0001-0502-0512	437.52		19	32.314	5.8798					MAX_2022.10.18-ctrl-6-S-1.nd2:0001-0483-0512	2344.92		45	64.465	6.98053	8.74687			MAX_2022.10.18-LatA-9-S-1.nd2:0001-0512-0694	763.01		43	78.64	5.46796				MAX_2022.10.18-Noco-11-S-1.nd2:0001-0502-0512	817.907		37
MAX_2022.10.18-ctrl-6-P1-1.nd2:0001-0529-0687	825.526	856.827	30	31.407	9.55201	8.08751			MAX_2022.10.18-LatA-10-F-1.nd2:0001-0484-0512	412.704		24	33.334	7.19986				MAX_2022.10.18-Noco-11-T-1.nd2:0001-0529-0512	370.712		18	31.78	5.66394					MAX_2022.10.18-ctrl-6-P1-1.nd2:0001-0529-0687	2129.03	1789.13							MAX_2022.10.18-LatA-9-S1-1.nd2:0001-0430-0512	716.185		20	30.962	6.45953				MAX_2022.10.18-Noco-11-T-1.nd2:0001-0529-0512	1028.9	948.646	16
MAX_2022.10.18-ctrl-5-T-1.nd2:0001-0512-0704	383.934		31	46.963	6.60094				MAX_2022.10.18-LatA-10-P-1.nd2:0001-0541-0512	497.628		32	34.133	9.37509				MAX_2022.10.18-Noco-11-T1-1.nd2:0001-0512-0514	379.227	423.409	11	30.823	3.56876	6.43383				MAX_2022.10.18-ctrl-5-T-1.nd2:0001-0512-0704	661.942		45	46.963	9.58201				MAX_2022.10.18-LatA-9-T-1.nd2:0001-0475-0512	672.897	737.164	17	30.857	5.50928	6.41394			2022.10.18-Noco-11-T1-1.nd2:0001-0512-0514:c:3/3 z:1/4 - 2022.10.18-Noco-11-T1.nd2 (series 1)	902.424		26
MAX_2022.10.18-ctrl-5-S1-1.nd2:0001-0430-0512	432.081		46	32.068	14.3445				MAX_2022.10.18-LatA-10-P1-1.nd2:0001-0541-0512	303.386		25	32.612	7.66589				MAX_2022.10.18-Noco-12-P-1.nd2:0001-0512-0474	410.041		19	31.467	6.03807					MAX_2022.10.18-ctrl-5-S1-1.nd2:0001-0430-0512	644.403		39	32.068	12.1617				MAX_2022.10.18-LatA-10-F-1.nd2:0001-0484-0512	634.682		17	33.334	5.0999				MAX_2022.10.18-Noco-12-P-1.nd2:0001-0512-0474	594.535		17
MAX_2022.10.18-ctrl-5-S-1.nd2:0001-0512-0579	484.009		65	32.687	19.8856				MAX_2022.10.18-LatA-10-S-1.nd2:0001-0399-0512	482.34		33	32.793	10.0631				MAX_2022.10.18-Noco-12-S-1.nd2:0001-0512-0288	332.668	371.354	7	52.163	1.34195	3.69001				MAX_2022.10.18-ctrl-5-S-1.nd2:0001-0512-0579	1004.6		20	32.687	6.11864				2022.10.18-LatA-10-P-1.nd2:0001-0541-0512:c:3/3 z:1/5 - 2022.10.18-LatA-10-P.nd2 (series 1)	466.738		6	34.133	1.75783				MAX_2022.10.18-Noco-12-S-1.nd2:0001-0512-0288	687.525	641.03	36
MAX_2022.10.18-ctrl-5-P1-1.nd2:0001-0512-0535	475.737		69	32.52	21.2177				MAX_2022.10.18-LatA-10-T-1.nd2:0001-0512-0456	529.892	445.19	18	30.928	5.81997	8.23102			MAX_2022.10.18-Noco-14-P-1.nd2:0001-0507-0512	296.032		7	30.446	2.29915					MAX_2022.10.18-ctrl-5-P1-2.nd2:0001-0512-0535	852.451		34	32.52	10.4551				MAX_2022.10.18-LatA-10-P1-1.nd2:0001-0541-0512	613.488		34	32.612	10.4256				MAX_2022.10.18-Noco-14-P-1.nd2:0001-0507-0512	564.705		23
MAX_2022.10.18-ctrl-5-P-1.nd2:0001-0512-0543	339.968	423.146	61	59.696	10.2184	14.4534			MAX_2022.10.18-LatA-11-F-1.nd2:0001-0512-0510	365.039		6	31.734	1.89072				MAX_2022.10.18-Noco-14-S-1.nd2:0001-0452-0512	293.195		10	43.035	2.32369					MAX_2022.10.18-ctrl-5-P-1.nd2:0001-0512-0543	1033.8	839.439	43	59.696	7.20316	9.10412			MAX_2022.10.18-LatA-10-S-1.nd2:0001-0399-0512	861.934		35	32.793	10.673				MAX_2022.10.18-Noco-14-P-1.nd2:0001-0507-0512	564.705
MAX_2022.10.18-ctrl-4-S-1.nd2:0001-0512-0496	399.186		52	48.306	10.7647				MAX_2022.10.18-LatA-11-P-1.nd2:0001-0512-0515	454.309		40	31.618	12.651				MAX_2022.10.18-Noco-14-S1-1.nd2:0001-0512-0698	355.249		17	31.455	5.40455					MAX_2022.10.18-ctrl-4-S-1.nd2:0001-0512-0496	930.701		35	48.306	7.24548				MAX_2022.10.18-LatA-10-T-1.nd2:0001-0512-0456	855.07	686.382	17	30.928	5.49664	6.6906			MAX_2022.10.18-Noco-14-S-1.nd2:0001-0452-0512	518.136		33
MAX_2022.10.18-ctrl-4-P1-1.nd2:0001-0428-0499	441.457		27	49.48	5.45675				MAX_2022.10.18-LatA-11-P1-1.nd2:0001-0512-0500	380.711		21	31.874	6.58844				MAX_2022.10.18-Noco-14-T-1.nd2:0001-0512-0488	403.049		14	31.442	4.45264					MAX_2022.10.18-ctrl-4-P1-1.nd2:0001-0428-0499	1136		29	49.48	5.86095				MAX_2022.10.18-LatA-11-F-1.nd2:0001-0512-0510	637.621		12	31.734	3.78143				MAX_2022.10.18-Noco-14-S1-1.nd2:0001-0512-0698	929.177		29
MAX_2022.10.18-ctrl-4-P-1.nd2:0001-0512-0679	341.811		33	31.516	10.4709				MAX_2022.10.18-LatA-11-S-1.nd2:0001-0512-0469	423.215		26	33.236	7.82284				MAX_2022.10.18-Noco-14-T1-1.nd2:0001-0512-0567	438.006	357.106	12	31.591	3.79855	3.65572				MAX_2022.10.18-ctrl-4-P1-1.nd2:0001-0428-0499	1136								MAX_2022.10.18-LatA-11-P-1.nd2:0001-0512-0515	653.659		20	31.618	6.32551				MAX_2022.10.18-Noco-14-T-1.nd2:0001-0512-0488	1005.93		31
MAX_2022.10.18-ctrl-4-F-1.nd2:0001-0675-0512	408.231	397.671	21	32.481	6.46532	8.28941			MAX_2022.10.18-LatA-11-S1-1.nd2:0001-0466-0512	518.192	428.293	32	31.444	10.1768	7.82597			MAX_2022.10.18-Noco-15-F-1.nd2:0001-0512-0543	312.034		12	33.564	3.57526					MAX_2022.10.18-ctrl-4-P-1.nd2:0001-0512-0679	517.034		23	31.516	7.29788				MAX_2022.10.18-LatA-11-P1-1.nd2:0001-0512-0500	672.127		15	31.874	4.70603				MAX_2022.10.18-Noco-14-T1-1.nd2:0001-0512-0567	855.036	739.614	20
MAX_2022.10.18-ctrl-3-T-1.nd2:0001-0512-0483	530.051		33	31.589	10.4467				MAX_2022.10.18-LatA-12-F-1.nd2:0001-0675-0512	837.926	522.871							MAX_2022.10.18-Noco-15-P-1.nd2:0001-0512-0512	320.192		25	55.352	4.51655					MAX_2022.10.18-ctrl-4-F-1.nd2:0001-0675-0512	837.926	911.532	28	32.481	8.62042	7.25618			MAX_2022.10.18-LatA-11-S-1.nd2:0001-0512-0469	720.978		25	33.236	7.52196				MAX_2022.10.18-Noco-15-F-1.nd2:0001-0512-0543	686.809		24
MAX_2022.10.18-ctrl-3-S1-1.nd2:0001-0273-0512	352.656		30	31.276	9.59202				MAX_2022.10.18-LatA-12-T-1.nd2:0001-0512-0483	560.282								MAX_2022.10.18-Noco-15-S-1.nd2:0001-0548-0512	296.684		10	31.355	3.18928					MAX_2022.10.18-ctrl-3-T-1.nd2:0001-0512-0483	560.282		27	31.589	8.54728				MAX_2022.10.18-LatA-11-S1-1.nd2:0001-0466-0512	952.875	727.452	26	31.444	8.26867	6.12072			MAX_2022.10.18-Noco-15-P-1.nd2:0001-0512-0512	919.404		34
MAX_2022.10.18-ctrl-3-P-1.nd2:0512-0627	496.681	459.796	21	28.14	7.46269	9.16713			MAX_2022.10.18-LatA-12-S1-1.nd2:0001-0273-0512	475.376								MAX_2022.10.18-Noco-15-S1-1.nd2:0001-0477-0512	406.136		17	31.788	5.34793					MAX_2022.10.18-ctrl-3-S1-1.nd2:0001-0273-0512	475.376		20	31.276	6.39468													MAX_2022.10.18-Noco-15-S-1.nd2:0001-0548-0512	664.75		40
MAX_2022.10.18-ctrl-1-P-1.nd2			44	53.933	8.15827				MAX_2022.10.18-LatA-12-P-1.nd2:0512-0627	581.427	517.829							MAX_2022.10.18-Noco-15-T-1.nd2:0001-0444-0210	343.522	335.714	5	29.366	1.70265	3.66633				MAX_2022.10.18-ctrl-3-P-1.nd2:0512-0627	581.427	517.829	18	32.304	5.57207	6.83801												MAX_2022.10.18-Noco-15-S1-1.nd2:0001-0477-0512	667.857		25
																																														MAX_2022.10.18-Noco-15-T-1.nd2:0001-0444-0210	804.534	748.671	21
MAX_9-S-2.nd2:0001-0512-0453	497.225		17	31.388	5.41608				MAX_8-T-1.nd2:0001-0401-0512	545.746		15	36.19	4.14479				MAX_8-T-2.nd2:0001-0512-0502	454.102	v	6	33.298	1.80191					MAX_9-S-1.nd2:0001-0512-0453	459.223		7	31.388	2.23015				MAX_8-T-1.nd2	1019.91		43	36.19	11.8817				MAX_8-T-1.nd2:0001-0512-0502	1026.52		28
MAX_9-P-1.nd2:0001-0593-0513	682.6	589.913	15	30.645	4.89476	5.15542			MAX_8-T-1.nd2:0001-0437-0512	504.471		10	36.561	2.73515				MAX_8-S-2.nd2:0001-0512-0370	483.001		5	32.395	1.54345					MAX_9-P-1.nd2:0001-0593-0513	558.27	508.747	22	30.645	7.17899	4.70457			MAX_8-T-2.nd2	806.272		30	36.561	8.20546				MAX_8-S-1.nd2:0001-0512-0370	587.958		14
MAX_8-T-1.nd2:0001-0555-0512	693.038		24	64.5	3.72093				MAX_8-S-1.nd2:0001-0512-0531	428.978		9	31.815	2.82885				MAX_8-P-2.nd2:0001-0512-0529	459.511		5	31.981	1.56343					MAX_8-T-1.nd2:0001-0555-0512	1220.44		37	64.5	5.73643				MAX_8-S-2.nd2	814.094		30	31.815	9.42951				MAX_8-P-1.nd2:0001-0512-0529	669.703		6
MAX_8-S-1.nd2:0001-0458-0512	603.301		12	53.309	2.25103				MAX_8-P-1.nd2:0001-0512-0500	469.785	487.245	20	31.246	6.40082	4.0274			MAX_8-F-2.nd2:0001-0467-0512	355.238	437.963	6	31.02	1.93424	1.71076				MAX_8-S-1.nd2:0001-0397-0512	646.896		35	53.309	6.5655				MAX_8-P-1.nd2	738.02	844.573	15	31.246	4.80061	8.57933			MAX_8-F-1.nd2:0001-0467-0512	408.723	673.226	11
MAX_8-P-1.nd2:0001-0512-0731	582.568		25	31.436	7.95267				MAX_1-S-1.nd2:0001-0520-0512	401.687		17	32.7	5.19878				MAX_7-T-2.nd2:0001-0523-0512	381.474		6	31.947	1.87811					MAX_8-P-1.nd2:0001-0512-0564	408.812		18	31.436	5.72592				MAX_1-S-1.nd2	374.605		14	31.945	4.38253				MAX_7-T-1.nd2:0001-0523-0512	532.225		17
MAX_8-F-1.nd2:0001-0384-0512	615.057	623.491	23	31.319	7.34378	5.3171			MAX_1-p-1.nd2:0001-0535-0512	274.229	337.958	5	31.332	1.59581				MAX_7-S-2.nd2:0001-0386-0512	440.236		13	32.99	3.94059					MAX_8-F-2.nd2:0001-0383-0512	740.526	754.169	12	31.319	3.83154	5.46485			MAX_1-p-1.nd2	716.493	545.549	8	30.392	2.63227	1.31614			MAX_7-S-1.nd2:0001-0386-0512	498.4		8
MAX_7-T-1.nd2:0001-0595-0512	456.93		9	58.022	1.55114				MAX_4-ST-1.nd2:0001-0664-0512	602.058		25	32.673	7.65158				MAX_7-P-2.nd2:0001-0557-0512	412.388	411.366	8	29.347	2.726	2.84823				MAX_7-T-1.nd2:0001-0595-0512	1076.05		47	58.022	8.10038				MAX_4-ST-1.nd2	734.569		27	32.7	8.25688				MAX_7-P-2.nd2:0001-0557-0512	512.388	514.338	12
MAX_7-F-1.nd2:0001-0512-0608	390.369		4	45.18	0.885347				MAX_4-F-1.nd2:0001-0485-0512	426.205		3	30.436	0.985675	3.85796			MAX_6-T-2.nd2:0001-0559-0512	368.559		5	30.792	1.6238					MAX_7-F-2.nd2:0001-0512-0608	801.136		41	45.18	9.07481				MAX_4-F-1.nd2	535.121		22	31.332	7.02158				MAX_6-T-1.nd2:0001-0559-0512	350.684		16
MAX_7-T-1.nd2:0001-0693-0512	661.111		6	30.792	1.94856				MAX_4-P-1.nd2:0001-0477-0512	489.18		5	30.392	1.64517				MAX_6-S-2.nd2:0001-0398-0512	439.815		9	33.401	2.69453					MAX_7-T-1.nd2:0001-0693-0512	1023.99	967.057	27	30.792	8.76851				MAX_4-P-2.nd2	441.703		13	32.673	3.97882				MAX_6-S-1.nd2:0001-0398-0512	661.162		11
MAX_7-S-1.nd2:0001-0512-0743	603.897		14	30.965	4.52123				MAX_4-S-1.nd2:0001-0519-0512	378.112	473.889	2	38.094	0.525017	1.08509			MAX_6-P-3.nd2:0001-0476-0512	650.432		12	31.75	3.77953					MAX_7-S-2.nd2:0001-0512-0743	933.49		25	30.965	8.07363				MAX_4-S-1.nd2	367.253	519.662	33	30.436	10.8424	7.52492			MAX_6-P-2.nd2:0001-0476-0512	426.005		10
MAX_7-P-1.nd2:0001-0512-0569	624.15	547.291	23	60.436	3.80568	2.54239			MAX_2-S-1.nd2:0001-0512-0430	479.038		12	64.327	1.86547				MAX_6-F-2.nd2:0001-0472-0512	463.46	480.567	3	30.687	0.977613	2.26887				MAX_7-P-1.nd2:0001-0512-0596	928.715	931.102	40	60.436	6.61857	8.12718			MAX_2-S-2.nd2	509.76		7	64.327	1.08819				MAX_6-F-1.nd2:0001-0472-0512	364.921	450.693	12
MAX_6-P-1.nd2:0001-0512-0625	618.176		29	49.012	5.91692				MAX_2-T-1.nd2:0001-0526-0512	540.911		5	31.125	1.60643				MAX_5-T-2.nd2:0001-0551-0512	366.445		3	30.952	0.969243					MAX_6-P-1-1.nd2:0001-0512-0650	488.595		21	49.012	4.28466				MAX_2-T-1.nd2	469.428		8	31.125	2.57028				MAX_5-T-1.nd2:0001-0551-0512	749.843		8
MAX_6-S-1.nd2:0001-0512-0565	626.335		18	31.511	5.71229				MAX_2-P-1.nd2:0001-0512-0508	392.966		5	30.843	1.62111				MAX_5-S-2.nd2:0001-0467-0512	465.103		6	30.122	1.9919					MAX_6-S-1.nd2:0001-0512-0565	881.717		20	31.511	6.34699				MAX_2-T-2.nd2	467.972		7	30.843	2.26956				MAX_5-S-1.nd2:0001-0467-0512	405.144		27
MAX_6-T-1.nd2:0001-0598-0512	507.644	584.052	10	38.473	2.59923	4.74281			MAX_2-T-1.nd2:0001-0526-0512	444.668	464.396	4	30.134	1.3274	1.6051			MAX_5-P-2.nd2:0001-0428-0512	456.02	429.189	9	31.267	2.87843	1.94653				MAX_6-T-1.nd2:0001-0615-0512	591.124	653.812	23	38.473	5.97822	5.53662			MAX_2-P-2.nd2	597.887	511.262	11	30.134	3.65036	2.3946			MAX_5-P-1.nd2:0001-0428-0512	689.889	614.959	10
MAX_5-T-1.nd2:0001-0476-0512	429.341		7	31.048	2.25457				MAX_3-F-1.nd2:0001-0429-0512	402.453		5	39.762	1.25748				MAX_4-T-2.nd2:0001-0512-0488	481.498		8	31.199	2.56418					MAX_5-T-1.nd2:0001-0476-0512	629.086		21	31.048	6.76372				MAX_3-T.nd2			4	25.876	1.54583				MAX_4-T-1.nd2:0001-0512-0488	473.514		15
MAX_5-S-1.nd2:0001-0468-0512	433.799		22	29.999	7.33358				MAX_3-T-2.nd2:0001-0512-0512	352.221		6	25.876	2.31875				MAX_4-S-2.nd2:0001-0512-0503	628.259		15	31.589	4.74849					MAX_5-S-1.nd2:0001-0468-0512	731.782		16	29.999	5.33351				MAX_3-F-2.nd2	506.558		2	39.762	0.502993				MAX_4-S-1.nd2:0001-0512-0503	645.087		15
MAX_5-P1-1.nd2:0001-0512-0436	415.24		17	34.836	4.88001				MAX_3-S-2.nd2:0001-0512-0546	515.417		14	31.199	4.48732				MAX_4-P-2.nd2:0001-0512-0459	417.592		14	30.697	4.56071					MAX_5-P1-1.nd2:0001-0512-0534	483.023		16	34.836	4.59295				MAX_3-T-1.nd2	841.265		11	39.762	2.76646				MAX_4-P-1.nd2:0001-0512-0459	578.008		15
MAX_5-P-1.nd2:0001-0500-0512	536.873	453.813	21	30.818	6.8142	5.32059			MAX_3-P1-2.nd2:0001-0512-0493	417.876		5	32.835	1.52277				MAX_4-F-2.nd2:0001-0512-0462	392.006	479.839	9	31.142	2.88999	3.69084				MAX_5-P-1.nd2:0001-0500-0512	804.086	661.994	24	30.818	7.78766	6.11946			MAX_3-S-1.nd2	548.845		6	31.199	1.92314				MAX_4-F-1.nd2:0001-0512-0462	563.096	564.926	13
MAX_4-T-1.nd2:0001-0512-0433	566.641		18	34.307	5.24674				MAX_3-P-2.nd2:0001-0511-0512	470.01	431.595	18	30.85	5.83468	3.0842			MAX_3-T-2.nd2:0001-0512-0512	424.453		9	31.593	2.84873					MAX_4-T-1.nd2:0001-0512-0437	985.614		44	34.307	12.8254				MAX_3-P1-1.nd2	915.768		8	32.835	2.43642				MAX_3-T-1.nd2:0001-0512-0512	575.264		32
MAX_4-S-2-1.nd2:0001-0512-0443	586.758		14	32.764	4.27298				MAX_7-S-2.nd2:0001-0512-0543	431.325		9	31.009	2.90238				MAX_3-S-2.nd2:0001-0524-0512	445.532		5	30.971	1.61441					MAX_4-S-1.nd2:0001-0512-0443	992.771		23	32.764	7.0199				MAX_3-P-1.nd2	669.81	696.449	12	30.85	3.88979	2.17744			MAX_3-S-1.nd2:0001-0524-0512	436.268		14
MAX_4-P-1.nd2:0001-0512-0515	582.971	578.79	21	33.122	6.3402	5.28664			MAX_7-T-2-2.nd2:0001-0512-0435	563.609	497.467	7	32.991	2.12179				MAX_3-P-2.nd2:0001-0512-0516	469.472		6	32.327	1.85603					MAX_4-P-1.nd2:0001-0512-0514	1092.29	1023.56	35	33.122	10.567	10.1374			MAX_7-P-1.nd2	563.544		11	32.991	3.33424				MAX_3-P-1.nd2:0001-0512-0516	566.369		16
MAX_3-T-1.nd2:0001-0512-0463	533.306		5	32.327	1.54669				MAX_5-S-2.nd2:0001-0473-0512	426.981		4	35.32	1.1325	2.05223			MAX_3-F-2.nd2:0001-0512-0585	424.052	440.877	5	31.209	1.6021	1.98032				MAX_3-T-1.nd2:0001-0512-0486	634.719		31	32.327	9.58951				MAX_7-S-1.nd2	623.729	593.636	14	31.009	4.51482				MAX_3-F-1.nd2:0001-0512-0585	721.628	574.882	24
MAX_3-S-1.nd2:0001-0512-0481	584.145		14	31.973	4.37869				MAX_5-T-2.nd2:0001-0573-0670	469.106	448.043	15	30.776	4.87393				MAX_2-T-2.nd2:0001-0512-0472	429.843		11	31.961	3.44169					MAX_3-S-1.nd2:0001-0512-0481	694.868		26	31.973	8.13186				MAX_7-T-1-1.nd2			9	35.32	2.54813	3.46573			MAX_2-T-2-1.nd2:0001-0512-0472	612.32		11
MAX_3-P-1.nd2:0001-0512-0535	642.095	586.515	23	30.159	7.62625	4.51721			MAX_6-P-2.nd2:0001-0512-0593	583.772		14	32.575	4.29777				MAX_2-S-2.nd2:0001-0516-0512	455.382		9	30.858	2.91659					MAX_3-P-1.nd2:0001-0512-0517	882.03	737.206	26	30.159	8.62098	8.78078			MAX_5-P-1.nd2	528.755		13	30.776	4.22407				MAX_2-S-1.nd2:0001-0516-0512	537.318		15
MAX_2-S-1.nd2:0001-0599-0512	424.76		5	38.813	1.28823				MAX_6-S-2.nd2:0001-0534-0512	460.383		10	44.913	2.22653	3.79941			MAX_2-P-2.nd2:0001-0569-0512	402.221		12	30.675	3.91198					MAX_2-S-1.nd2:0001-0599-0512	589.156		19	38.813	4.89527				MAX_5-S-1.nd2	676.18		9	32.575	2.76285				MAX_2-P-1.nd2:0001-0569-0512	529.539		11
MAX_2-P-1.nd2:0001-0683-0512	519.159	471.959	20	85.699	2.33375	1.81099			MAX_6-T-2.nd2:0001-0526-0512	285.214	443.123	6	32.353	1.85454				MAX_2-F-2.nd2:0001-0512-0503	360.641	412.022	5	31.471	1.58876	2.96476				MAX_2-P-2.nd2:0001-0683-0512	784.866	687.011	34	85.699	3.96737	4.43132			MAX_5-T-1.nd2	484.369	563.101	7	44.913	1.55857	2.8485			MAX_2-F-1.nd2:0001-0512-0503	547.463	556.66	8
MAX_1-T-1.nd2:0001-0512-0387	525.911		16	63.991	2.50035				MAX_5-P-2.nd2:0001-0646-0512	633.408		9	31.862	2.82468				MAX_1-T-2.nd2:0001-0512-0475	521.848		7	37.647	1.85938					MAX_1-T-2.nd2:0001-0512-0387	558.941		12	63.991	1.87526				MAX_6-P-1.nd2	615.377	643.718	9	32.353	2.78181				MAX_1-T-1.nd2:0001-0512-0475	571.721		12
MAX_1-S-1.nd2:0001-0512-0496	545.66		4	31.43	1.27267				MAX_7-P-2.nd2:0001-0582-0512	554.689	594.048	4	40.29	0.992802	1.89068			MAX_1-P-2.nd2:0001-0512-0486	551.769		14	37.027	3.78102					MAX_1-S-1.nd2:0001-0512-0496	543.307		23	31.43	7.31785				MAX_6-S-1.nd2	716.61		19	31.862	5.96322				MAX_1-P-1.nd2:0001-0512-0486	690.15		15
MAX_1-P-1.nd2:0001-0512-0407	547.006	539.526	13	37.788	3.44025	2.40442												MAX_1-S-2.nd2:0001-0512-0496	484.151	519.256	4	32.356	1.23625	2.29222				MAX_1-P-1.nd2:0001-0512-0407	470.352	524.2	20	37.788	5.29269	4.8286			MAX_6-T-1.nd2	599.166		9	40.29	2.2338	3.65961			MAX_1-S-1.nd2:0001-0512-0496	423.137	561.669	8
Normalize
number																mean intensity
Ctrl-GPN	LatA-GPN	Noco-GPN	Ctrl-PSD95	LatA-PSD95	Noco-PSD95	ave-Ctrl-GPN	Ctrl-GPN	LatA-GPN	Noco-GPN	ave-Ctrl-PSD95	Ctrl-PSD95	LatA-PSD95	Noco-PSD95			Ctrl-GPN	LatA-GPN	Noco-GPN	Ctrl-PSD95	LatA-PSD95	Noco-PSD95	ave-Ctrl-GPN	Ctrl-GPN	LatA-GPN	Noco-GPN	ave-Ctrl-PSD95	Ctrl-PSD95	LatA-PSD95	Noco-PSD95
17.2049	15.996	17.7067	9.63294	6.95518	5.29677	11.2286	1.53225	1.42458	1.57694	9.03288	1.06643	0.769985	0.586388			856.827	551.149	700.208	1789.13	988.303	1216.25	562.373	1.52359	0.980043	1.2451	960.608	1.8625	1.02883	1.26613
14.8411	11.1063	16.9317	6.17475	9.59399	9.07293	11.2286	1.32173	0.989114	1.50792	9.03288	0.683586	1.06212	1.00443			740.795	506.471	623.009	1269.8	943.086	1162.52	562.373	1.31727	0.900597	1.10782	960.608	1.32187	0.981759	1.2102
14.4534	11.0877	14.1025	7.75473	7.01128	11.7681	11.2286	1.2872	0.987455	1.25595	9.03288	0.858501	0.776196	1.30281			654.875	499.164	604.86	1033.09	890.821	1082.16	562.373	1.16449	0.887603	1.07555	960.608	1.07546	0.927351	1.12654
11.2817	8.31855	11.7241	11.6548	6.61599	7.32395	11.2286	1.00473	0.740839	1.04413	9.03288	1.29026	0.732435	0.81081			558.241	445.19	601.18	1030.73	820.51	948.646	562.373	0.992654	0.791628	1.06901	960.608	1.073	0.854157	0.987548
11.2168	8.23102	9.60042	9.96194	2.9289	5.11444	11.2286	0.99895	0.733043	0.855	9.03288	1.10285	0.324248	0.566203			537.102	435.913	554.463	928.691	793.681	923.437	562.373	0.955064	0.775131	0.985935	960.608	0.966774	0.826227	0.961305
10.6713	7.82597	9.56808	5.76215	9.60323	7.11059	11.2286	0.950372	0.69697	0.85212	9.03288	0.637909	1.06314	0.78719			536.662	428.293	519.906	911.532	737.164	791.545	562.373	0.954283	0.761583	0.924487	960.608	0.948912	0.767393	0.824005
9.55786	7.80688	8.33667	11.9041	10.2348	11.8843	11.2286	0.85121	0.69527	0.742452	9.03288	1.31786	1.13307	1.31568			523.887	424.558	493.148	857.338	727.452	748.671	562.373	0.931565	0.754942	0.876907	960.608	0.892495	0.757283	0.779372
9.16713	6.95911	6.43383	11.723	7.50543	4.63878	11.2286	0.816412	0.619769	0.572988	9.03288	1.29782	0.830902	0.513544			497.096	423.908	481.465	839.439	686.382	739.614	562.373	0.883926	0.753785	0.856131	960.608	0.873863	0.714529	0.769944
8.74308	3.30786	6.39522	10.9138	6.41394	7.63958	11.2286	0.778646	0.294593	0.569549	9.03288	1.20823	0.710067	0.845753			459.796	351.126	423.409	823.765	646.864	737.089	562.373	0.8176	0.624365	0.752897	960.608	0.857546	0.67339	0.767315
8.28941	2.68988	4.92899	8.74687	6.6906	11.2398	11.2286	0.738244	0.239557	0.438969	9.03288	0.968337	0.740694	1.24432			423.146	327.862	400.568	565.336	535.328	715.577	562.373	0.75243	0.582998	0.712282	960.608	0.588519	0.557281	0.744921
8.08751		4.0329	9.10412	6.12072	9.01154	11.2286	0.720262		0.359165	9.03288	1.00789	0.677605	0.997638			397.671		371.354	517.829		692.663	562.373	0.707131		0.660335	960.608	0.539064		0.721068
11.2286		3.69001	7.25618		6.15196	11.2286			0.328627	9.03288	0.803308		0.681064			562.373		365.324	960.608		641.03	562.373	1		0.649612	960.608			0.667317
		3.66633	6.83801		8.12648	11.2286			0.326519	9.03288	0.757013		0.899656					357.106			625.34	562.373			0.634999	960.608			0.650983
		3.65572	9.03288		8.21318	11.2286			0.325573	9.03288			0.909254					335.714				562.373			0.596959	960.608
Ctrl-GPN	LatA-GPN	Noco-GPN	Ctrl-PSD95	LatA-PSD95	Noco-PSD95	ave-Ctrl-GPN	Ctrl-GPN	LatA-GPN	Noco-GPN	ave-Ctrl-PSD95	Ctrl-PSD95	LatA-PSD95	Noco-PSD95			Ctrl-GPN	LatA-GPN	Noco-GPN	Ctrl-PSD95	LatA-PSD95	Noco-PSD95	ave-Ctrl-GPN	Ctrl-GPN	LatA-GPN	Noco-GPN	ave-Ctrl-PSD95	Ctrl-PSD95	LatA-PSD95	Noco-PSD95
623.491	594.048	519.256	508.747	844.573	673.226	552.817	1.12784	1.07458	0.939291	719.937	0.706654	1.17312	0.935117			5.32059	4.0274	3.69084	4.70457	8.57933	4.5382	4.12195	1.29079	0.977062	0.895411	6.45898	0.728377	1.32828	0.702618
589.913	497.467	480.567	754.169	545.549	514.338	552.817	1.0671	0.899877	0.869305	719.937	1.04755	0.757773	0.71442			5.3171	3.85796	2.96476	5.46485	1.31614	3.9451	4.12195	1.28995	0.935954	0.71926	6.45898	0.846085	0.203768	0.610793
586.515	487.245	479.839	967.057	519.662	450.693	552.817	1.06096	0.881386	0.867989	719.937	1.34325	0.721815	0.626017			5.28664	3.79941	2.84823	8.12718	7.52492	3.88738	4.12195	1.28256	0.92175	0.690991	6.45898	1.25828	1.16503	0.601857
584.052	473.889	440.877	931.102	511.262	614.959	552.817	1.0565	0.857226	0.797511	719.937	1.29331	0.710148	0.854184			5.15542	3.0842	2.29222	5.53662	2.3946	2.27988	4.12195	1.25072	0.748238	0.5561	6.45898	0.857198	0.370739	0.352979
578.79	464.396	437.963	653.812	696.449	564.926	552.817	1.04698	0.840054	0.792239	719.937	0.908151	0.967375	0.784688			4.74281	2.05223	2.26887	6.11946	2.17744	4.49405	4.12195	1.15062	0.497877	0.550435	6.45898	0.947435	0.337118	0.695783
547.291	448.043	429.189	661.994	593.636	574.882	552.817	0.990005	0.810474	0.776368	719.937	0.919517	0.824567	0.798517			4.51721	1.89068	1.98032	10.1374	3.46573	6.82217	4.12195	1.09589	0.458684	0.480432	6.45898	1.56951	0.536576	1.05623
539.526	443.123	412.022	774.075	563.101	556.66	552.817	0.975958	0.801573	0.745313	719.937	1.0752	0.782153	0.773206			2.54239	1.6051	1.94653	8.78078	2.8485	3.13104	4.12195	0.616793	0.389403	0.472234	6.45898	1.35947	0.441014	0.484758
471.959	431.595	411.366	737.206	643.718	561.669	552.817	0.853736	0.780721	0.744127	719.937	1.02399	0.89413	0.780164			2.40442	1.08509	1.71076	4.43132	3.65961	1.75355	4.12195	0.583321	0.263247	0.415035	6.45898	0.686071	0.566593	0.271491
453.813	337.958		687.011			552.817	0.820911	0.611338		719.937	0.954265					1.81099			4.8286			4.12195	0.439352			6.45898	0.747579
552.817			524.2			552.817				719.937	0.728119					4.12195			6.45898			4.12195	1			6.45898
			719.937							719.937
[truncated: 3 more columns]

## Sheet: Figure 6D_Raw data and normaliz
Source data
Ctrl_GPN									LatA_GPN									Noco_GPN								Ctrl_PSD95									LatA_PSD95									Noco_PSD95
Source	mean intensity	intensity of per neuron	number	length	puncta number of per 10 μm	puncta number of per neuron		Source	mean intensity	intensity of per neuron	number	length	puncta number of per 10 μm	puncta number of per neuron		Source	mean intensity	intensity of per neuron	number	length	puncta number of per 10 μm	puncta number of per neuron				Source	intensity	intensity of per neuron	number	length	puncta number of per 10 μm	puncta number of per neuron			Source	intensity	intensity of per neuron		number	length	puncta number of per 10 μm	puncta number of per neuron			Source	intensity	intensity of per neuron	number	length
MAX_9-T-1.nd2:0002-0512-0530	396.616		15	31	4.83871			MAX_5-T-1.nd2:0002-0478-0512	738.83		12	30.768	3.90016			MAX_1-T-1.nd2:0002-0488-0512	574.999		13	31.327	4.14977					MAX_9-T-2.nd2:0002-0512-0530	447.529		13	31	4.19355				MAX_5-T-2.nd2:0002-0478-0512	363.445		8	30.768	2.6001				MAX_1-T-2.nd2:0002-0488-0512	362.4		8	31.327	2.55371
MAX_9-S-1.nd2:0002-0569-0512	349.03		8	44.047	1.81624			MAX_5-S-1.nd2:0002-0587-0512	657.041	697.936	3	31.201	0.961508	2.43083		MAX_1-S-1.nd2:0002-0443-0512	510.866		6	31.982	1.87606					MAX_9-S-2.nd2:0002-0569-0512	520.287		11	44.047	2.49733				MAX_5-S-2.nd2:0002-0587-0512	331.053	347.249	5	31.201	1.60251	2.10131			MAX_1-S-2.nd2:0002-0443-0512	500.472		9	31.982	2.81408
MAX_9-P-1.nd2:0002-0481-0512	210.099	318.582	18			3.32748		MAX_2-T-3.nd2:0002-0512-0475	409.824		3	31.486	0.952804			MAX_1-P-1.nd2:0002-0457-0512	464.061		8	22.981	3.48114					MAX_9-P-2.nd2:0002-0481-0512	589.7	519.172	45			3.34544			MAX_2-T-2.nd2:0002-0512-0475	654.821		16	31.486	5.08162				MAX_1-P-2.nd2:0002-0457-0512	437.02		20	22.981	8.70284
MAX_8-T-1.nd2:0002-0512-0711	519.501		11	42.325	2.59894			MAX_2-S-3.nd2:0002-0512-0513	319.009		5	33.031	1.51373			MAX_1-F-1.nd2:0002-0574-0512	377.291	481.804	10	30.965	3.22945	3.1841				MAX_8-T-2.nd2:0002-0512-0711	474.534		11	42.325	2.59894				MAX_2-S-2.nd2:0002-0512-0513	298.362		2	33.031	0.605492				MAX_1-F-2.nd2:0002-0574-0512	402.146	425.51	15	30.965	4.84418
MAX_8-S-1.nd2:0002-0512-0561	439.619		21	32.613	6.43915			MAX_2-S-2.nd2:0002-0512-0577	322.221		4	30.892	1.29483			MAX_2-T-1.nd2:0002-0542-0510	408.092		11	32.306	3.40494					MAX_8-S-2.nd2:0002-0512-0561	536.614	505.574	29	32.613	8.89216				MAX_2-P-1.nd2:0002-0512-0332	424.211		4	30.892	1.29483				MAX_2-T-2.nd2:0002-0542-0510	323.559		19	32.306	5.88126
MAX_8-P-1.nd2:0002-0572-0512	316.088	425.069	22	31.149	7.06283	5.36697		MAX_2-P-2.nd2:0002-0512-0332	514.338		7	52.969	1.32153	1.27072		MAX_2-S-1.nd2:0002-0512-0536	598.846		19	31.966	5.94382					MAX_8-P-2.nd2			30	31.149	9.63113	7.04074			MAX_2-F-2.nd2:0002-0512-0525	385.038	440.608	6	52.969	1.13274	2.02867			MAX_2-S-2.nd2:0002-0512-0536	553.831		21	31.966	6.56948
MAX_7-T-1.nd2:0002-0512-0599	630.611		11	30.897	3.56022			MAX_2-F-1.nd2:0002-0512-0525	397.845	392.647	6	31.514	1.90392			MAX_2-P-1.nd2:0002-0512-0495	515.76		16	31.448	5.08776					MAX_7-T-2.nd2:0002-0512-0599	507.989		14	30.897	4.53118				MAX_4-T-2.nd2:0002-0512-0489	437.842		5	31.514	1.5866				MAX_2-P-2.nd2:0002-0512-0495	529.32		7	31.448	2.2259
MAX_7-S-1.nd2:0002-0512-0502	599.858		23	31.55	7.29002			MAX_4-T-1.nd2:0002-0512-0489	563.482		4	31.442	1.27218			MAX_2-F-1.nd2:0002-0512-0341	266.296		13	61.344	2.1192					MAX_7-S-2.nd2:0002-0512-0502	541.039		17	31.55	5.38827				MAX_4-S-2.nd2:0002-0516-0512	426.185		7	31.442	2.22632				MAX_2-F-1.nd2:0002-0512-0341	593.391		25	61.344	4.07538
MAX_7-P1-1.nd2:0002-0417-0512	571.053		24	30.977	7.74768			MAX_4-S-1.nd2:0002-0516-0512	529.55		6	31.406	1.91046			MAX_2-F1-1.nd2:0002-0590-0512	477.6	453.319	3	31.534	0.951354	3.50141				MAX_7-P1-2.nd2:0002-0417-0512	573.613	541.733	53	30.977	17.1095				MAX_4-P-2.nd2:0002-0449-0512	425.203		12	31.406	3.82093				MAX_2-F1-2.nd2:0002-0590-0512	453.136	475.897	3	31.534	0.951354
MAX_7-P-1.nd2:0002-0512-0571	530.909	583.108	47	31.236	15.0467	8.41116		MAX_4-P-1.nd2:0002-0449-0512	357.639		7	32.172	2.17581	1.81559		MAX_3-T-1.nd2:0002-0316-0512	530.845		9	49.733	1.80966					MAX_7-P-2.nd2:0002-0512-0571	544.29		43	31.236	13.7662	10.1988			MAX_4-F-2.nd2:0002-0512-0461	431.396	430.156	3	32.172	0.932488	2.14158			MAX_3-T-2.nd2:0002-0316-0512	340.652		17	49.733	3.41825
MAX_6-T-1.nd2:0002-0528-0512	523.075		13	46.294	2.80814			MAX_4-F-1.nd2:0002-0512-0461	539.78	497.613	8	32.812	2.43813			MAX_3-S-1.nd2:0002-0355-0512	467.568		9	30.703	2.93131					MAX_6-T-2.nd2:0002-0528-0512	682.18		27	46.294	5.83229				MAX_3-T-2.nd2:0002-0457-0512	339.375		8	32.812	2.43813				MAX_3-S-2.nd2:0002-0355-0512	408.26		17	30.703	5.53692
MAX_6-S-1.nd2:0002-0512-0548	499.058		8	30.993	2.58123			MAX_3-T-1.nd2:0002-0457-0512	414.245		7	30.967	2.26047			MAX_3-P1-1.nd2:0002-0550-0512	254.279		8	34.154	2.34233					MAX_6-S-2.nd2:0002-0512-0548	671.537		35	30.993	11.2929				MAX_3-S-2.nd2:0002-0355-0512	403.703		9	30.967	2.90632				MAX_3-P1-2.nd2:0002-0550-0512	505.324		24	34.154	7.027
MAX_6-P-1.nd2:0003-0512-0405	458.709		22	31.436	6.99835			MAX_3-S-1.nd2:0002-0355-0512	446.283		7	30.796	2.27302			MAX_3-P-1.nd2:0002-0512-0513	294.028	386.68	11	32.535	3.38097	2.61607				MAX_6-P-2.nd2:0003-0512-0405	692.358	682.446	29	31.436	9.22509	8.19429			MAX_3-P1-2.nd2:0002-0550-0512	505.754		33	30.796	10.7157				MAX_3-P-2.nd2:0002-0512-0513	437.18	418.079	25	32.535	7.68403
MAX_6-F-1.nd2:0002-0512-0462	494.636	493.87	28	35.787	7.82407	5.05295		MAX_3-P1-1.nd2:0002-0550-0512	254.728		10	31.194	3.20574	2.54434		MAX_5-T-1.nd2:0002-0501-0512	779.738		10	31.41	3.1837					MAX_6-F-2.nd2:0002-0512-0462	683.709		23	35.787	6.42691				MAX_3-P-2.nd2:0002-0512-0511	434.078	420.728	18	31.194	5.77034				MAX_5-T-2.nd2:0002-0501-0512	368.409		10	31.41	3.1837
MAX_5-P-1.nd2:0002-0524-0512	396.76		23	31.406	7.32344			MAX_3-P-1.nd2:0002-0512-0511	290.264	351.38	6	31.967	1.87694			MAX_5-F-1.nd2:0002-0455-0512	577.108	678.423	9	31.726	2.83679	3.01024				MAX_5-S-2.nd2:0002-0512-0527	598.509	598.63	22	31.406	7.00503				MAX_6-T-2.nd2:0002-0512-0522	444.598		11	31.967	3.44105	5.45762			MAX_5-F-2.nd2:0002-0455-0512	493.766	431.087	12	31.726	3.78239
MAX_5-S-1.nd2:0002-0512-0527	427.976	412.368	32	38.778	8.2521	7.78777		MAX_6-T-1.nd2:0002-0512-0522	501.451		5	32.724	1.52793			MAX_4-S-1.nd2:0002-0509-0512	506.791		11	31.818	3.45716					MAX_5-P-2.nd2:0002-0524-0512	598.75		31	38.778	7.99422	7.49963			MAX_6-P-2.nd2:0002-0512-0484	519.889		11	32.724	3.36145				MAX_4-P-2.nd2:0002-0449-0512	423.101		12	31.818	3.77145
MAX_4-S-1.nd2:0002-0469-0512	400.139		12	30.987	3.87259			MAX_6-P-1.nd2:0002-0512-0484	237.627		1	31.605	0.316406			MAX_4-F-1.nd2:0002-0512-0475	563.546		10	49.515	2.01959					MAX_4-S-2.nd2:0002-0469-0512	639.074		20	30.987	6.45432				MAX_6-F-2.nd2:0002-0581-0512	447.851		10	31.605	3.16406				MAX_4-S-2.nd2:0002-0509-0512	417.834		9	49.515	1.81763
MAX_4-T-1.nd2:0002-0512-0514	394.548		10					MAX_6-F-1.nd2:0002-0581-0512	361.588		3	31.338	0.957304	1.16964		MAX_4-S-1.nd2:0002-0510-0512	499.912		8	31.614	2.53052					MAX_4-T-2.nd2:0002-0512-0514	509.201	563.713	16						MAX_6-S-2.nd2:0002-0531-0512	282.312	423.663	7	31.338	2.23371	2.91974			MAX_4-F-2.nd2:0002-0512-0475	441.636		15	31.614	4.74473
MAX_4-P-1.nd2:0002-0398-0512	387.27	393.986	19	40.825	4.65401	4.2633		MAX_6-S-1.nd2:0002-0531-0512	507.059	401.931	7	32.938	2.1252			MAX_4-T-1.nd2:0002-0512-0492	558.424	532.168	10	32.674	3.06054					MAX_4-P-2.nd2:0002-0398-0512	542.863		63	40.825	15.4317	10.943			MAX_9-s-2.nd2:0002-0535-0512	506.479		6	32.938	1.8216				MAX_4-S-2.nd2:0002-0510-0512	415.176		10	32.674	3.06054
MAX_3-P1-1.nd2:0002-0472-0512	352.864		6	30.219	1.98551			MAX_9-s-1.nd2:0002-0535-0512	473.85		8	30.604	2.61404			MAX_5-P-1.nd2:0002-0495-0512	393.759		16	31.603	5.06281	3.22613				MAX_3-P1-2.nd2:0002-0472-0512	462.281		11	30.219	3.64009				MAX_9-P-2.nd2:0002-0504-0512	586.766		27	30.604	8.82238				MAX_4-T-2.nd2:0002-0512-0492	434.853	426.52	11	31.603	3.48068
MAX_3-S-1.nd2:0002-0512-0574	515.551		12	48.373	2.48072			MAX_9-P-1.nd2:0002-0504-0512	497.522		5	31.396	1.59256	2.1106		MAX_6-T-1.nd2:0002-0602-0512	879.671		19	31.254	6.07922					MAX_3-S-2.nd2:0002-0512-0574	730.366	631.004	19	48.373	3.92781				MAX_9-F-2.nd2:0002-0478-0512	429.023	507.423	23	31.396	7.32577	5.98992			MAX_5-P-2.nd2:0002-0495-0512	360.267		11	31.254	3.51955
MAX_3-P-1.nd2:0002-0512-0493	466.061	444.825	28	31.679	8.83866	4.43496		MAX_9-P-1.nd2:0002-0509-0512	258.144		3	37.671	0.796369			MAX_6-P-1.nd2:0002-0478-0512	648.295		6	32.517	1.84519					MAX_3-P-2.nd2:0002-0512-0493	700.365		24	31.679	7.576	5.04797			MAX_8-T-2.nd2:0002-0512-0502	660.589		15	37.671	3.98184				MAX_6-T-2.nd2:0002-0602-0512	536.964		13	32.517	3.99791
MAX_2-P1-1.nd2:0002-0512-0498	484.162		24	31.537	7.61011			MAX_9-F-1.nd2:0002-0478-0512	455.419	421.234	2	30.747	0.65047			MAX_6-F-1.nd2:0002-0514-0512	783.968	676.423	13	31.297	4.15375					MAX_2-P1-1.nd2:0002-0512-0498	708.101		32	31.537	10.1468				MAX_8-S-2.nd2:0002-0520-0508	524.658		15	30.747	4.87852				MAX_6-P-2.nd2:0002-0478-0512	480.309		15	31.297	4.79279
MAX_2-S-1.nd2:0002-0512-0469	559.6		10	29.533	3.38604			MAX_8-T-1.nd2:0002-0512-0502	282.849		10	31.779	3.14673	1.53119		MAX_5-P-1.nd2:0002-0512-0296	468.498		17	32.213	5.27737					MAX_2-S-2.nd2:0002-0512-0469	628.688	644.48	19	29.533	6.43348				MAX_8-P-2.nd2:0002-0512-0576	633.87	606.372	6	31.779	1.88804	3.5828			MAX_6-F-2.nd2:0002-0514-0512	454.64	458.045	9	32.213	2.7939
MAX_2-T-1.nd2:0002-0512-0562	543.036	528.933	13	32.967	3.94334	4.97983		MAX_8-S-1.nd2:0002-0520-0508	303.646		3	33.055	0.907578			MAX_5-F-1.nd2:0002-0519-0512	541.988		13	34.587	3.75864	4.22283				MAX_2-T-2.nd2:0002-0512-0562	596.65		21	32.967	6.37001	7.6501			MAX_7-S-2.nd2:0002-0512-0505	413.224		19	33.055	5.748				MAX_5-P-2.nd2:0002-0512-0296	450.201		13	34.587	3.75864
MAX_2-F-1.nd2:0002-0512-0491	488.661		15	43.441	3.45296			MAX_8-P-1.nd2:0002-0512-0576	500.314	362.27	17	32.029	5.30769			MAX_5-T-1.nd2:0002-0534-0512	347.8	347.8	11	31.474	3.49495					MAX_2-F-2.nd2:0002-0512-0491	656.469	596.774	25	43.441	5.75493				MAX_7-P-2.nd2:0002-0512-0306	607.569		26	32.029	8.11764				MAX_5-S-2.nd2:0002-0495-0521	432.167		8	31.474	2.54178
MAX_2-P-1.nd2:0002-0512-0541	487.085	487.873	17	31.007	5.48263	4.4678		MAX_7-S-1.nd2:0002-0512-0505	475.41		6	32.509	1.84564	2.68697					6							MAX_2-P-2.nd2:0002-0512-0541	537.078		44	31.007	14.1903	9.97264			MAX_7-T-2.nd2:0002-0280-0512	308.48	443.091	9	32.509	2.76846	5.5447			MAX_5-F-2.nd2:0002-0519-0512	421.589		11	30.147	3.64879
MAX_1-S-1.nd2:0003-0551-0512	470.773		21	31.745	6.61521			MAX_7-P-1.nd2:0002-0512-0306	501.802		27	78.497	3.43962						8	30.147	2.65366					MAX_1-S-2.nd2:0003-0551-0512	719.108		32	31.745	10.0803				MAX_10-T-2.nd2:0002-0512-0457	381.167		23	78.497	2.93005				MAX_5-T-2.nd2:0002-0534-0512	374.287	419.561	18	30.694	5.86434
MAX_1-S1-1.nd2:0002-0475-0512	495.972		21	33.593	6.2513			MAX_7-T-1.nd2:0002-0280-0512	414.468	463.893	13	62.49	2.08033						5	30.694	1.62898	2.59253				MAX_1-S1-2.nd2:0002-0475-0512	823.389	736.683	36	33.593	10.7165				MAX_10-S-2.nd2:0002-0512-0581	435.56		18	62.49	2.88046
MAX_1-P-1.nd2:0002-0514-0512	454.726	473.824	28	30.935	9.05124	7.30592		MAX_10-T-1.nd2:0002-0512-0457	536.12		6	31.478	1.90609	2.47535												MAX_1-P-2.nd2:0002-0514-0512	667.552		56	30.935	18.1025	12.9664			MAX_10-P-2.nd2:0002-0512-0488	555.292	457.34	31	31.478	9.84815	5.21955
								MAX_10-S-1.nd2:0002-0512-0581	535.982		9																								MAX_11-T-2.nd2:0002-0512-0541	618.144		0
								MAX_10-P-1.nd2:0002-0512-0488	442.943	505.015	8	30.888	2.59																						MAX_11-S-2.nd2:0002-0456-0452	564.82		14	30.888	4.5325
								MAX_11-T-1.nd2:0002-0512-0541	470.206		23	31.853	7.22067	4.90534																					MAX_11-P-2.nd2:0002-0512-0529	673.268	618.744	38	31.853	11.9298	8.23115
								MAX_11-S-1.nd2:0002-0456-0452	404.229		18	30.933	5.81903																						MAX_12-T-2.nd2:0002-0475-0512	546.027		19	30.933	6.14231
								MAX_11-P-1.nd2:0002-0512-0529	651.948	508.794	21	31.402	6.68747																						MAX_12-S-2.nd2:0002-0462-0512	586.876		24	31.402	7.64283
								MAX_12-T-1.nd2:0002-0475-0512	590.689		4	36.279	1.10257	4.53636																					MAX_12-P-2.nd2:0002-0499-0512	523.376	552.093	29	36.279	7.99361	7.25958
								MAX_12-S-1.nd2:0002-0462-0512	637.771		2	30.725	0.650936																						MAX_13-T-2.nd2:0002-0456-0512	596.579		32	30.725	10.415
								MAX_12-P-1.nd2:0002-0499-0512	291.076	506.512	8	31.182	2.56558																						MAX_13-S-2.nd2:0002-0424-0512	594.414		13	31.182	4.16907
								MAX_13-T-1.nd2:0002-0456-0512	432.529		4	30.432	1.31441																						MAX_13-P-2.nd2:0002-0525-0512	556.008		6	30.432	1.97161
								MAX_13-S-1.nd2:0002-0424-0512	403.859		5	31.197	1.60272	1.53341																					MAX_13-F-2.nd2:0002-0512-0486	622.626	592.407	29	31.197	9.29577	6.46285
								MAX_13-P-1.nd2:0002-0525-0512	388.899		17	30.627	5.55066																						MAX_18-P-2.nd2:0002-0561-0512	426.207		34	30.627	11.1013
								MAX_13-F-1.nd2:0002-0512-0486	384.208	402.374	16	32.704	4.89237	5.22151																					MAX_18-P-2.nd2:0002-0566-0512	433.631	429.919	18	32.704	5.50391	8.30261
								MAX_18-P-1.nd2:0002-0561-0512	492.791		10	31.808	3.14386																						MAX_17-T-2.nd2:0002-0436-0512	459.338		18	31.808	5.65895
								MAX_18-P-1.nd2:0002-0566-0512	480.333	486.562	15	32.244	4.65203																						MAX_17-S-2.nd2:0002-0494-0512	567.948		35	32.244	10.8547
								MAX_17-T-1.nd2:0002-0436-0512	569.265		13	30.444	4.27014	4.02201																					MAX_17-P-2.nd2:0002-0452-0512	624.765	550.684	19	30.444	6.24097	7.58488
								MAX_17-S-1.nd2:0002-0494-0512	597.79		12	31.837	3.7692																						MAX_16-P-2.nd2:0002-0512-0499	416.395		15	31.837	4.7115
								MAX_17-P-1.nd2:0002-0452-0512	673.84	613.632	12	37.853	3.17016	3.46968																					MAX_15-S-2.nd2:0002-0440-0594	571.926	494.161	30	37.853	7.9254
								MAX_16-S-1.nd2:0002-0512-0555	334.243		13	31.076	4.18329																						MAX_15-P1-2.nd2:0002-0512-0566	463.057		18	31.076	5.79225	6.14305
								MAX_16-P-1.nd2:0002-0512-0499	450.872	441.04	10	42.28	2.36518																						MAX_15-P-2.nd2:0002-0512-0505	567.398		29	42.28	6.85904
								MAX_15-S-1.nd2:0002-0440-0594	538.005		13	31.942	4.06988	3.53945																					MAX_14-P-2.nd2:0002-0512-0548	448.645	493.033	29	31.942	9.07896	7.969
								MAX_15-P1-1.nd2:0002-0512-0566	316.368
								MAX_15-P-1.nd2:0002-0512-0505	393.663	442.889
								MAX_14-P-1.nd2:0002-0512-0548	523.521
MAX_5-T-2.nd2:0001-0512-0475	1225.47		27	31.607	8.54241			MAX_5-T-2.nd2:0001-0512-0774	864.842		23	45.337	5.07312			MAX_6-T-2.nd2:0001-0512-0498	382.292		6	52.22	1.14899					MAX_5-T-1.nd2:0001-0512-0475	519.612		3	31.607	0.949157				MAX_5-S-1.nd2:0001-0480-0512	582.7		2	45.337	0.441141				MAX_6-T-1.nd2:0001-0512-0498	521.514		9	52.22	1.72348
MAX_5-S-2.nd2:0001-0512-0463	1108.55		12	32.151	3.73239			MAX_5-S-2.nd2:0001-0480-0512	898.051		22	32.739	6.71981			MAX_6-P-2.nd2:0001-0512-0402	734.011	558.152	3	32.337	0.92773	1.03836				MAX_5-P-1.nd2:0001-0411-0512	377.663	448.637	4	32.151	1.24413				MAX_5-P-1.nd2:0001-0517-0524	496.346	539.523	6	32.739	1.83268				MAX_6-P-1.nd2:0001-0512-0402	413.955	467.735	4	32.337	1.23697
MAX_5-P-2.nd2:0001-0411-0512	927.256	1087.09	26	57.383	4.53096	5.60192		MAX_5-P-2.nd2:0001-0517-0524	816.264	859.719	23	34.492	6.66821	6.15372		MAX_5-S-2.nd2:0001-0586-0512	657.03		12	29.835	4.02212					MAX_4-S-1.nd2:0001-0512-0527	365.929		6	57.383	1.04561	1.07963			MAX_4-T-1.nd2:0001-0627-0512	359.205		6	34.492	1.73953	1.33778			MAX_5-S-1.nd2:0001-0586-0512	407.905		4	29.835	1.34071
MAX_4-S-1.nd2:0001-0512-0527	1038.63		27	31.451	8.58478			MAX_4-T-2.nd2:0001-0627-0512	637.639		21	30.087	6.97976			MAX_5-P-2.nd2:0001-0479-0459	464.086	560.558	2	29.02	0.68918	2.35565				MAX_4-P-1.nd2:0001-0512-0448	446.645	406.287	4	31.451	1.27182				MAX_4-F-1.nd2:0001-0574-0528	404.361		3	30.087	0.997108				MAX_5-P-1.nd2:0001-0479-0459	355.516	381.711	5	29.02	1.72295
MAX_4-P-2.nd2:0001-0512-0448	1032.38	1035.5	10	31.826	3.14209	5.86343		MAX_4-F-2.nd2:0001-0574-0528	697.313		23	30.757	7.47797			MAX_4-P-2.nd2:0001-0512-0646	571.843	571.843	8	32.113	2.4912					MAX_3-T-1.nd2:0001-0402-0512	336.92		4	31.826	1.25683	1.26433			MAX_4-S-1.nd2:0001-0469-0512	531.437	431.668	1	30.757	0.325129				MAX_4-P-1.nd2:0001-0512-0646	423.407	423.407	9	32.113	2.8026
MAX_3-T-2.nd2:0001-0402-0512	940.968		20	32.055	6.23928			MAX_4-S-2.nd2:0001-0469-0512	724.873	686.608	19	30.817	6.16543	6.87439		MAX_3-T-2.nd2:0001-0512-0517	700.801		10	45.45	2.20022					MAX_3-S-1.nd2:0001-0538-0512	587.678		3	32.055	0.935891				MAX_3-T-1.nd2:0001-0512-0552	464.018	464.018	4	30.817	1.29798	0.873408			MAX_3-T-1.nd2:0001-0512-0517	449.748		3	45.45	0.660066
MAX_3-S-2.nd2:0001-0538-0512	1271.88		29	31.381	9.24126			MAX_3-T-2.nd2:0001-0512-0552	663.73	663.73	12	49.698	2.41458	2.41458		MAX_3-S-2.nd2:0001-0512-0399	522.472		2	32.265	0.619867					MAX_3-P-1.nd2:0001-0512-0619	299.249	407.949	7	31.381	2.23065	1.58327			MAX_2-P-1.nd2:0001-0578-0512	793.414		11	49.698	2.21337	2.21337			MAX_3-S-1.nd2:0001-0512-0399	496.583		6	32.265	1.8596
MAX_3-P-2.nd2:0001-0512-0619	1100.3	1104.38	9	30.948	2.9081	6.12955		MAX_2-P-2.nd2:0001-0578-0512	356.192		6	31.923	1.87952			MAX_3-P-2.nd2:0001-0512-0478	510.39	577.888	16	31.598	5.06361	2.6279				MAX_2-Tnd2-1.nd2:0001-0613-0512	693.474			30.948					MAX_2-S-1.nd2:0001-0579-0670	642.328	717.871	10	31.923	3.13254				MAX_3-P-1.nd2:0001-0512-0478	514.248	486.86	8	31.598	2.53181
MAX_2-Tnd2-2.nd2:0001-0613-0512	715.104		25	30.641	8.159			MAX_2-S-2.nd2:0001-0579-0670	818.398	587.295	14	36.925	3.79147	2.8355		MAX_2-T-2.nd2:0001-0512-0554	581.401		10	39.685	2.51984					MAX_2-PSnd2-1.nd2:0001-0608-0512	767.875		9	31.052	2.89836				MAX_1-P-1.nd2:0001-0512-0705	355.432		9	36.925	2.43737	2.78496			MAX_2-T-1.nd2:0001-0512-0554	323.772		1	39.685	0.251984
MAX_2-P-2.nd2:0001-0495-0512	727.539		19	31.052	6.11877			MAX_1-P-3.nd2:0001-0512-0705	644.29		15	45.982	3.26215			MAX_2-Snd2-2.nd2:0001-0512-0559	579.498	580.449	16	31.306	5.11084	3.81534				MAX_2-P-1.nd2:0001-0495-0512	721.903		10	30.641	2.61088				MAX_1-P1-1.nd2:0001-0512-0668	587.221	471.327	4	45.982	0.869906				MAX_2-Snd2-1.nd2:0001-0512-0559	384.086	353.929	4	31.306	1.27771
MAX_2-P-1.nd2:0001-0356-0512	725.952		28	30.788	9.09445			MAX_1-P1-2.nd2:0001-0512-0668	648.413	646.351	15	32.476	4.6188	3.94047		MAX_1-T-2.nd2:0001-0512-0305	1222.57		33	58.406	5.6501					MAX_2-P-1.nd2:0001-0356-0512	720.772	726.006	25	30.788	8.12005							6	32.476	1.84752	1.35871			MAX_1-T-1-1.nd2:0001-0512-0305	430.586		3	58.406	0.513646
MAX_2-PSnd2-2.nd2:0001-0608-0512	762.747	732.836	21	30.788	6.82084	7.54827										MAX_1-S-2.nd2:0001-0463-0512	611.947		8	30.495	2.62338					MAX_1-P-1.nd2:0001-0577-0512	466.477		9	30.031	2.9969	4.15655												MAX_1-S-1.nd2:0001-0463-0512	462.928		4	30.495	1.31169
MAX_1-T-2.nd2:0001-0512-0504	624.449															MAX_1-P-2.nd2:0001-0512-0571	790.062	874.858	13	31.717	4.09875	4.12408				MAX_1-T-1.nd2:0001-0512-0504	355.42		8	56.603	1.76669													MAX_1-P-1.nd2:0001-0512-0571	493.48	462.331	2	31.717	0.630577
MAX_1-S1-2.nd2:0001-0521-0512	749.272		9	30.961	2.90688																					MAX_1-S1-1.nd2:0001-0521-0512	457.232		14	30.961	4.52182
MAX_1-P-2.nd2:0001-0577-0512	818.037		13	56.603	2.2967																					MAX_1-S-1.nd2:0001-0512-0578	464.007	435.784	9	31.102	2.8937
MAX_1-S1-2.nd2:0001-0521-0512	745.448		14	31.102	4.50132																								12	31.154	3.85183	3.25851
MAX_1-S-2.nd2:0001-0512-0578	815.898	750.621	13	31.154	4.17282	3.46943
MAX_2022.10.18-CTRL-1-P-1.nd2:0001-0512-0535	713.046		41	64.479	6.35866			MAX_2022.10.18-latA-1-P-1.nd2:0001-0471-0512	574.986		25	45.304	5.51828			MAX_2022.10.18-Noco-1-F-1.nd2:0001-0391-0507	523.266		4	31.381	1.27466					MAX_3-S-1.nd2:0001-0512-0690	370.456		25	32.593	7.67036				MAX_3-S-1.nd2:0001-0512-0699	353.156		12	31.17	3.84986				MAX_4-S-1.nd2:0001-0512-0510	393.656		20	32.298	6.19233
MAX_2022.10.18-CTRL-1-P1-1.nd2:0001-0708-0512	574.383		15	43.024	3.48643			MAX_2022.10.18-latA-1-S-1.nd2:0001-0491-0512	511.673		10	33.093	3.02179			MAX_2022.10.18-Noco-1-P1-1.nd2:0001-0420-0512	572.377		13	30.948	4.20059					MAX_3-P-1.nd2:0001-0512-0580	312.655	341.555	12	30.944	3.87797	5.77417			MAX_3-P-1.nd2:0001-0587-0512	326.769	339.962	19	32.298	5.88272	4.86629			MAX_4-S-1.nd2:0001-0512-0513	396.283
MAX_2022.10.18-CTRL-1-S-1.nd2:0001-0512-0565	697.497		33	57.932	5.69633			MAX_2022.10.18-latA-1-S1-1.nd2:0001-0454-0512	551.233	545.964	12	46.571	2.57671	3.70559		MAX_2022.10.18-Noco-1-S-1.nd2:0001-0512-0458	502.938		15	31.777	4.7204					MAX_2-S-1.nd2:0001-0512-0485	447.805		28	33.119	8.45436				MAX_2-S-1.nd2:0001-0599-0512	369.922		17	31.642	5.37261				MAX_4-P-1.nd2:0001-0504-0491	313.408	367.782	16	32.622	4.90467
MAX_2022.10.18-CTRL-1-T-1.nd2:0001-0480-0511	614.889	649.954	11	31.837	3.4551	4.74913		MAX_2022.10.18-latA-2-P-1.nd2:0001-0512-0541	565.394		39	31.339	12.4446			MAX_2022.10.18-Noco-1-T-1.nd2:0001-0512-0482-1	565.032	540.903	9	31.363	2.86962					MAX_2-P-1.nd2:0001-0512-0656	457.478	452.642	27	33.915	7.96108	8.20772			MAX_2-P-1.nd2:0001-0443-0512	341.704	355.813	11	31.036	3.54427	4.45844			MAX_3-S-1.nd2:0001-0656-0512	305.669		16	31.12	5.14139
MAX_2022.10.18-CTRL-2-p-1.nd2:0001-0407-0512	577.023		22	31.618	6.95806			MAX_2022.10.18-latA-3-P-1.nd2:0001-0512-0444	414.778		7	30.483	2.29636			MAX_2022.10.18-Noco-2-P-1.nd2:0001-0512-0407	544.359		16	31.667	5.05258	3.62357				MAX_1-T-1.nd2:0001-0406-0512	502.708		38	30.394	12.5025				MAX_1-S-1.nd2:0001-0451-0558	412.098		8	29.339	2.72675				MAX_3-P-1.nd2:0001-0508-0512	374.374	340.022	15	31.579	4.74999
MAX_2022.10.18-CTRL-2-P1-1.nd2:0001-0512-0535-1	639.81		26	52.291	4.97217			MAX_2022.10.18-latA-3-S-1.nd2:0001-0512-0568	440.125	473.432	5	39.492	1.26608	5.33567		MAX_2022.10.18-Noco-2-S-1.nd2:0001-0512-0384	691.335		16	38.989	4.10372					MAX_1-S-1.nd2:0001-0433-0512	415.567		20	29.943	6.67936				MAX_1-P-1.nd2:0001-0512-0787	415.872	413.985	20	43.28	4.62107	3.67391			MAX_2-S-1-1.nd2:0001-0512-0637	8		11	31.368	3.50676
MAX_2022.10.18-CTRL-2-S-1.nd2:0001-0406-0512	697.728	638.187	57	78.81	7.23258	6.38761		MAX_2022.10.18-latA-4-P-1.nd2:0001-0512-0538	542.043		10	31.84	3.1407			MAX_2022.10.18-Noco-2-T-1.nd2:0001-0488-0510	690.887	642.194	27	36.288	7.44048					MAX_1-P-1.nd2:0001-0279-0512	378.831	432.369	24	35.17	6.824	8.66861			MAX_9-S-1.nd2:0001-0514-0790	428.468		24	48.521	4.94631				MAX_2-P-1.nd2:0001-0512-0665	483.886	245.943	13	31.12	4.17738
MAX_2022.10.18-CTRL-3-P-1.nd2:0001-0512-0502	638.644		11	32.116	3.42508			MAX_2022.10.18-latA-4-S-1.nd2:0001-0512-0537	519.353		7	31.432	2.22703			MAX_2022.10.18-Noco-3-F-1.nd2:0001-0512-0424	561.006		15	31.902	4.7019	5.41537				MAX_8-S-1.nd2:0001-0424-0512	566.739		25	40.074	6.23846				MAX_9-P-1.nd2:0001-0317-0512	384.579	406.524	11	31.597	3.48134	4.21383			MAX_1-P-1.nd2:0001-0512-0483	434.355	434.355	18	32.229	5.58503
MAX_2022.10.18-CTRL-3-T-1.nd2:0001-0503-0512	690.853	664.749	25	31.585	7.91515	5.67012		MAX_2022.10.18-latA-4-T-1.nd2:0001-0512-0456	490.581		8	31.674	2.52573			MAX_2022.10.18-Noco-3-S-1.nd2:0001-0497-0512	600.72		10	31.633	3.16126					MAX_8-P-1.nd2:0001-0651-0512	469.546	518.143	20	31.314	6.38692				MAX_8-S-1.nd2:0001-0593-0512	490.931		13	30.896	4.20766				MAX_10-S-1.nd2:0001-0512-0502	437.31		8	32.389	2.46997
MAX_2022.10.18-CTRL-4-P-1.nd2:0001-0508-0512	800.496		54	31.473	17.1576			MAX_2022.10.18-latA-4-F-1.nd2:0001-0512-0628	459.668	502.911	3	31.427	0.954593	2.21201		MAX_2022.10.18-Noco-3-S1-1.nd2:0001-0512-0626	521.756	561.161	27	31.335	8.61656	5.88891				MAX_7-S-1.nd2:0001-0501-0572	552.828		19	45.791	4.14929				MAX_8-P-1.nd2:0001-0505-0512	419.459	455.195	18	31.437	5.72574	4.9667			MAX_10-P-1.nd2:0001-0512-0467	406.202	421.756	8	31.33	2.55346
MAX_2022.10.18-CTRL-4-S-1.nd2:0001-0526-0512	867.388		53	31.744	16.6961			MAX_2022.10.18-latA-5-P-1.nd2:0001-0512-0536	558.702		19	31.599	6.01285			MAX_2022.10.18-Noco-11-S-1.nd2:0001-0512-0297	517.383		12	31.741	3.7806					MAX_7-P-1.nd2:0001-0512-0438	484.928	518.878	21	31.051	6.76307	5.88443			MAX_7-S-1.nd2:0001-0572-0512	398.354		13	30.683	4.23687				MAX_9-S-1.nd2:0001-0512-0483	391.45		8	31.333	2.55322
MAX_2022.10.18-CTRL-4-T-1.nd2:0001-0454-0512	979.739	882.541	21	35.758	5.87281	13.2421		MAX_2022.10.18-latA-5-P1-1.nd2:0001-0500-0512	563.299		15	31.6	4.74684			MAX_2022.10.18-Noco-11-P-1.nd2:0001-0512-0638	491.811	483.305	12	32.164	3.73088	3.75574				MAX_6-S-1.nd2:0001-0542-0512	453.304		17	31.283	5.43426				MAX_7-P-1.nd2:0001-0512-0630	523.673	461.014	16	31.082	5.14767	3.55323			MAX_9-P-1.nd2:0001-0512-0423	328.291	359.87	11	39.883	2.75807
MAX_2022.10.18-CTRL-5-P-1.nd2:0001-0512-0462	588.119		18	32.317	5.56982			MAX_2022.10.18-latA-5-S-1.nd2:0001-0512-0419	575.506		13	32.127	4.04644			MAX_2022.10.18-Noco-10-S-1.nd2:0001-0493-0512	474.8		8	31.469	2.54218					MAX_6-P-1.nd2:0001-0818-0512	541.915	497.61	24	42.659	5.62601	5.53014			MAX_6-S-1.nd2:0001-0617-0512	273.621		4	31.369	1.27514				MAX_8-S-1.nd2:0001-0512-0461	413.817		7	31.514	2.22124
MAX_2022.10.18-CTRL-5-S-1.nd2:0001-0512-0447	562.799		8	31.779	2.51739			MAX_2022.10.18-latA-5-T-1.nd2:0001-0535-0512	483.719		6					MAX_2022.10.18-Noco-10-P-1.nd2:0001-0418-0512	597.047	535.923	14	33.741	4.14925	3.34572				MAX_5-P-1.nd2:0001-0709-0512	497.612	497.612	18	30.992	5.80795				MAX_6-P-1.nd2:0001-0427-0512	419.159	346.39	15	31.542	4.75556	3.01535			MAX_8-P-1.nd2:0001-0512-0448	309.341	361.579	5	42.605	1.17357
MAX_2022.10.18-CTRL-5-T-1.nd2:0001-0513-0495	535.246	562.055	9	31.966	2.81549	3.63423		MAX_2022.10.18-latA-5-F-1.nd2:0001-0512-0548	483.987		9	32.139	2.80034			MAX_2022.10.18-Noco-9-T-1.nd2:0001-0512-0511	689.141		25	32.178	7.76928					MAX_4-S-1.nd2:0001-0541-0512	329.21		34	31.554	10.7752				MAX_5-S-1.nd2:0001-0548-0512	349.101		12	31.559	3.8024				MAX_7-S-1.nd2:0001-0512-0506	333.004		8	42.813	1.86859
MAX_2022.10.18-CTRL-6-P-1.nd2:0001-0495-0512	569.79		16	31.32	5.10856			MAX_2022.10.18-latA-5-T1-1.nd2:0001-0528-0642	590.76	542.662	22	49.269	4.46528	4.41435		MAX_2022.10.18-Noco-9-S-1.nd2:0001-0512-0541	613.31		23	31.93	7.20326					MAX_4-P-1.nd2:0001-0645-0512	357.367	343.288	24	33.631	7.13627	7.90647			MAX_5-P-1.nd2:0001-0516-0512	413.897	381.499	8	30.648	2.61028	3.20634			MAX_7-S-1.nd2:0001-0512-0506	333.004
MAX_2022.10.18-CTRL-6-S-1.nd2:0001-0512-0539	511.216	540.503	16	31.842	5.02481	5.06668		MAX_2022.10.18-latA-6-P-1.nd2:0001-0512-0499	497.361		11	32.067	3.43032			MAX_2022.10.18-Noco-9-P-1.nd2:0001-0512-0554	554.034		33	30.964	10.6575					MAX_11-S-2.nd2:0001-0325-0512	537.378		28	29.999	9.33364				MAX_4-S-1.nd2:0001-0383-0512	376.89		19	32.95	5.76631				MAX_7-P-1.nd2:0001-0411-0512	470.796	378.935	26	34.075	7.63023
MAX_2022.10.18-CTRL-7-P-1.nd2:0001-0512-0704	722.968		41	81.137	5.05318			MAX_2022.10.18-latA-6-P1-1.nd2:0001-0512-0701	553.302		19	44.162	4.30234			MAX_2022.10.18-Noco-9-F-1.nd2:0001-0512-0347	565.395		24	55.775	4.303					MAX_11-P-1.nd2:0001-0378-0512	532.077	534.727	16	32.215	4.96663	7.15014			MAX_4-P-1.nd2:0001-0367-0512	330.75	353.82	16	33.174	4.82305	5.29468			MAX_6-S-1.nd2:0001-0358-0512	382.632		26	30.884	8.4186
MAX_2022.10.18-CTRL-7-S-1.nd2:0001-0512-0727	650.932	686.95	14	31.506	4.4436	5.05318		MAX_2022.10.18-latA-6-S-1.nd2:0001-0515-0512	502.903		6	31.379	1.91211			MAX_2022.10.18-Noco-9-P-1.nd2:0001-0512-0550	552.199	594.816	29	32.362	8.96113	7.77884				MAX_10-S-1.nd2:0001-0420-0512	416.014		35	31.741	11.0267				MAX_16-S-1.nd2:0001-0365-0512	333.145		8	62.115	1.28793				MAX_6-P-1.nd2:0001-0482-0512	370.011	376.322	10	31.247	3.20031
MAX_2022.10.18-CTRL-8-P-1.nd2:0001-0512-0490	460.624	460.624	13	5.81	22.3752			MAX_2022.10.18-latA-6-T-1.nd2:0001-0512-0464	558.567	528.033	14	35.89	3.90081	3.38639		MAX_2022.10.18-Noco-8-T-1.nd2:0001-0502-0512	624.736		20	31.549	6.33935					MAX_10-P-1.nd2:0001-0373-0512	363.748	389.881	13	30.866	4.21175	7.61925			MAX_16-P-1.nd2:0001-0512-0575	357.9	345.522	9	31.494	2.85769	2.07281			MAX_5-S-1.nd2:0001-0512-0564	484.74		12	31.286	3.83558
MAX_2022.10.18-CTRL-9-P-1.nd2:0001-0512-0645	581.811		19	50.595	3.75531			MAX_2022.10.18-latA-7-P-1.nd2:0001-0512-0502	585.021		37	31.073	11.9074			MAX_2022.10.18-Noco-8-P1-1.nd2:0001-0512-0648	673.554		26	31.618	8.22316					MAX_18-S-1.nd2:0001-0512-0464	333.054		12	31.263	3.8384				MAX_15-S-1.nd2:0001-0428-0512	295.264		16	66.56	2.40385				MAX_5-P-1.nd2:0001-0512-0559	310.455	397.598	22	47.798	4.6027
MAX_2022.10.18-CTRL-9-S-1.nd2:0001-0512-0560	573.434		18	31.521	5.71048			MAX_2022.10.18-latA-7-S-1.nd2:0001-0512-0465	584.871	584.946	27	31.608	8.54214	10.2248		MAX_2022.10.18-Noco-8-P-1.nd2:0001-0512-0512	674.825	657.705	20	32.653	6.12501	6.89584				MAX_18-P-1.nd2:0001-0512-0538	305.248	319.151	12	31.373	3.82495	3.83167			MAX_15-P-1.nd2:0001-0439-0512	374.32		10	32.317	3.09435	2.7491
MAX_2022.10.18-CTRL-9-S1-1.nd2:0001-0535-0512	542.113		10	31.366	3.18817			MAX_2022.10.18-CTRL-8-S-1.nd2:0001-0562-0512	523.311		17	34.329	4.95208			MAX_2022.10.18-Noco-7-S1-1.nd2:0001-0430-0314	445.284		3	45.601	0.65788					MAX_17-S-1.nd2:0001-0512-0444	362.64		20	30.502	6.55695				MAX_14-S-1.nd2:0001-0517-0512	294.143		10	30.618	3.26605
MAX_2022.10.18-CTRL-9-T-1.nd2:0001-0512-0411	531.009	557.092	17	50.055	3.39626	4.01256		MAX_2022.10.18-CTRL-8-T-1.nd2:0001-0462-0512	450.314	486.812	12	31.359	3.82665	4.38937		MAX_2022.10.18-Noco-7-S-1.nd2:0001-0420-0512	400.284		4	31.922	1.25305					MAX_17-P-1.nd2:0001-0512-0490	400.452	381.546	13	31.293	4.15428	5.35562			MAX_14-P-1.nd2:0001-0472-0512	321.71	321.359	28	51.662	5.41984	4.34295
MAX_2022.10.18-CTRL-10-P-1.nd2:0001-0487-0512	502.224		20	31.744	6.3004			MAX_2022.10.18-latA-9-P-1.nd2:0001-0512-0388	581.507		20	42.7	4.68384			MAX_2022.10.18-Noco-7-P-1.nd2:0001-0554-0512	465.434	437.001	8	31.573	2.53381	1.48158				MAX_16-P-1.nd2:0001-0241-0512	539.966	539.966	26	31.605	8.22655				MAX_13-S-1.nd2:0001-0478-0512	334.107		20	30.889	6.4748
MAX_2022.10.18-CTRL-10-S-1.nd2:0001-0757-0512	403.176		7	66.289	1.05598			MAX_2022.10.18-latA-9-S-1.nd2:0001-0512-0344	538.631		7	31.619	2.21386			MAX_2022.10.18-Noco-6-S1-1.nd2:0001-0581-0512	539.335		13	32.271	4.02838					MAX_14-P-1.nd2:0001-0496-0512	435.639	435.639	11	31.146	3.53175				MAX_13-P-1.nd2:0001-0403-0512	332.466		8	29.917	2.67406	4.57443
MAX_2022.10.18-CTRL-10-T-1.nd2:0001-0512-0526	426.79	444.063	5	32.069	1.55914	2.97184		MAX_2022.10.18-latA-9-T-1.nd2:0001-0512-0344	406.838		7	31.112	2.24994			MAX_2022.10.18-Noco-6-P-1.nd2:0001-0494-0512	531.517	535.426	50	76.361	6.54785	5.28811				MAX_13-S-1.nd2:0001-0551-0512	442.01		4	32.247	1.24043	5.87915			MAX_12-S-1.nd2:0001-0512-0477	347.694		9	31.33	2.87265
MAX_2022.10.18-CTRL-11-F-1.nd2:0001-0580-0512	551.309		8	31.957	2.50336			MAX_2022.10.18-latA-9-F-1.nd2:0001-0628-0512	643.965	542.735	10	33.007	3.02966	3.04432		MAX_2022.10.18-Noco-5-T-1.nd2:0001-0512-0482	565.264		17	31.383	5.41695					MAX_13-P-1.nd2:0001-0443-0512	350.065	396.038	8	31.723	2.52183				MAX_12-P-1.nd2:0001-0512-0515	380.235	338.089	11	30.651	3.58879	3.23072
MAX_2022.10.18-CTRL-11-F1-1.nd2:0001-0519-0512	511.113		11					MAX_2022.10.18-latA-10-P-1.nd2:0001-0531-0512	561.895		34	38.762	8.77148			MAX_2022.10.18-Noco-5-S-1.nd2:0001-0512-0465	587.037		16	32.432	4.9334					MAX_12-S-1.nd2:0001-0502-0512	391.356		15	31.71	4.73037	1.88113			MAX_11-S-1.nd2:0001-0554-0512	338.669		9	31.483	2.85869
MAX_2022.10.18-CTRL-11-P-1.nd2:0001-0733-0512	543.245		25	31.746	7.87501			MAX_2022.10.18-latA-10-S-1.nd2:0001-0759-0512	529.327		10	38.445	2.60112			MAX_2022.10.18-Noco-5-P-1.nd2:0001-0512-0510	581.005		26	29.982	8.67187					MAX_12-P-1.nd2:0512-0533	576.551	483.954	10	30.942	3.23185				MAX_11-P-1.nd2:0001-0469-0512	305.034		20	32.252	6.20117
MAX_2022.10.18-CTRL-11-S-1.nd2:0001-0512-0688	464.528		14	45.028	3.10918			MAX_2022.10.18-latA-10-P1-1.nd2:0001-0512-0474	694.379	595.2	21	32.074	6.54736	5.97332		MAX_2022.10.18-Noco-5-F-1.nd2:0001-0512-0459	488.569	555.469	9	31.935	2.81822	5.46011				MAX_11-S-1.nd2:0001-0690-0512	363.837		9	31.701	2.83903	3.03544			MAX_10-P-1.nd2:0001-0484-0502	352.605	332.103	16	31.193	5.12936	4.72974
MAX_2022.10.18-CTRL-11-T-1.nd2:0001-0422-0512	576.347	529.308	14	31.72	4.41362	4.47529		MAX_2022.10.18-latA-11-P-1.nd2:0001-0537-0512	524.499		15	31.258	4.79877			MAX_2022.10.18-Noco-4-T-1.nd2:0001-0453-0512	585.903		12	31.835	3.76944					MAX_11-P-1.nd2:0001-0370-0512	307.156	335.497
MAX_2022.10.18-CTRL-12-P-1.nd2:0001-0512-0664	552.795		27	49.222	5.48535			MAX_2022.10.18-latA-11-P1-1.nd2:0001-0512-0494	472.612		9	33.44	2.69139			MAX_2022.10.18-Noco-4-S1-1.nd2:0001-0457-0409	487.588		11	22.358	4.91994
MAX_2022.10.18-CTRL-12-S-1.nd2:0001-0512-0789	510.508		12	31.371	3.82519			MAX_2022.10.18-latA-11-S-1.nd2:0001-0518-0512	469.529	488.88	7	31.451	2.22568	4.50153		MAX_2022.10.18-Noco-4-S-1.nd2:0001-0451-0512	516.959		20	33.935	5.89362
MAX_2022.10.18-CTRL-12-T-1.nd2:0001-0512-0521	566.489	543.264	15	31.542	4.75556	4.6887		MAX_2022.10.18-latA-12-P-1.nd2:0001-0512-0486	577.639		27	31.441	8.58751			MAX_2022.10.18-Noco-4-P-1.nd2:0001-0568-0512	463.731		19	59.469	3.19494
								MAX_2022.10.18-latA-12-S-1.nd2:0001-0512-0467	537.305		9	31.375	2.86853			MAX_2022.10.18-Noco-4-F-1.nd2:0001-0512-0599	540.588	518.954	17	31.566	5.38554	4.6327
								MAX_2022.10.18-latA-12-T-1.nd2:0001-0512-0332	456.276	523.74	7	69.389	1.00881	4.15495
								MAX_2022.10.18-latA-13-P-1.nd2:0001-0469-0512	543.521		15	31.786	4.71906
								MAX_2022.10.18-latA-13-P1-1.nd2:0001-0512-0514	514.818		7	31.387	2.23022
								MAX_2022.10.18-latA-13-S-1.nd2:0001-0512-0437	558.758		14	32.1	4.36137
								MAX_2022.10.18-latA-13-T-1.nd2:0001-0512-0578	543.286		7	31.704	2.20792
								MAX_2022.10.18-latA-13-F-1.nd2:0001-0512-0545	491.344	530.345	4	31.223	1.28111	2.95994
								MAX_2022.10.18-latA-14-P-1.nd2:0001-0512-0455	457.124		13	31.252	4.15973
								MAX_2022.10.18-latA-14-S-1.nd2:0001-0512-0504	517.549		18	31.901	5.64246
								MAX_2022.10.18-latA-15-P-1.nd2:0001-0434-0513	615.01	529.894	17	31.872	5.33384	5.04534
normalize
mean intensity																		number
PSD95_Ctrl	PSD95_LatA	PSD95_Noco	average	PSD95_Ctrl	PSD95_LatA	PSD95_Noco		Gephyrin_Ctrl	Gephyrin_LatA	Gephyrin_Noco	average	Gephyrin_Ctrl	Gephyrin_LatA	Gephyrin_Noco				PSD95_Ctrl	PSD95_LatA	PSD95_Noco	average	PSD95_Ctrl	PSD95_LatA	PSD95_Noco		Gephyrin_Ctrl	Gephyrin_LatA	Gephyrin_Noco	average	Gephyrin_Ctrl	Gephyrin_LatA	Gephyrin_Noco
318.582	697.936	481.804	456.244	0.698271	1.52974	1.05602		519.172	347.249	425.51	602.021	0.862382	0.576806	0.706802				3.32748	2.43083	3.1841	5.53981	0.600648	0.438793	0.574767		3.34544	2.10131	4.7287	8.2859	0.403751	0.2536	0.570692
425.069	392.647	453.319	456.244	0.931672	0.860609	0.993589		505.574	440.608	475.897	602.021	0.839795	0.731882	0.7905				5.36697	1.27072	3.50141	5.53981	0.9688	0.22938	0.632045		7.04074	2.02867	3.94067	8.2859	0.849725	0.244834	0.475588
583.108	497.613	386.68	456.244	1.27806	1.09067	0.84753		541.733	430.156	418.079	602.021	0.899857	0.714521	0.694459				8.41116	1.81559	2.61607	5.53981	1.51831	0.327735	0.472231		10.1988	2.14158	5.91655	8.2859	1.23086	0.258461	0.71405
493.87	351.38	678.423	456.244	1.08247	0.770159	1.48698		682.446	420.728	431.087	602.021	1.13359	0.698859	0.716068				5.05295	2.54434	3.01024	5.53981	0.912115	0.459283	0.543384		8.19429	5.45762	3.48304	8.2859	0.988944	0.658663	0.420358
412.368	401.931	532.168	456.244	0.903833	0.880957	1.16641		598.63	423.663	426.52	602.021	0.994367	0.703734	0.708481				7.78777	1.16964	3.22613	5.53981	1.40578	0.211134	0.582353		7.49963	2.91974	3.37501	8.2859	0.905107	0.352374	0.407319
393.986	421.234	676.423	456.244	0.863542	0.923265	1.48259		563.713	507.423	458.045	602.021	0.936368	0.842866	0.760846				4.2633	2.1106	4.22283	5.53981	0.769575	0.380988	0.76227		10.943	5.98992	3.83581	8.2859	1.32068	0.722905	0.462932
444.825	362.27	347.8	456.244	0.974973	0.794027	0.762312		631.004	606.372	419.561	602.021	1.04814	1.00723	0.696921				4.43496	1.53119	2.59253	5.53981	0.800562	0.276397	0.467982		5.04797	3.5828	4.0183	8.2859	0.609223	0.432397	0.484956
528.933	463.893		456.244	1.15932	1.01677			644.48	443.091		602.021	1.07053	0.736006					4.97983	2.68697		5.53981	0.898916	0.485029			7.6501	5.5447		8.2859	0.923267	0.669173
487.873	505.015		456.244	1.06933	1.1069			596.774	457.34		602.021	0.991284	0.759674					4.4678	2.47535		5.53981	0.806489	0.446829			9.97264	5.21955		8.2859	1.20357	0.629932
473.824	508.794		456.244	1.03853	1.11518			736.683	618.744		602.021	1.22368	1.02778					7.30592	4.90534		5.53981	1.3188	0.88547			12.9664	8.23115		8.2859	1.56488	0.993392
456.244	506.512		456.244		1.11018			602.021	552.093		602.021		0.917066					5.53981	4.53636		5.53981	1	0.818864			8.2859	7.25958		8.2859	1	0.876136
	402.374		456.244		0.881927				592.407		602.021		0.984031						1.53341		5.53981		0.276798				6.46285		8.2859		0.779982
	486.562		456.244		1.06645				429.919		602.021		0.714127						5.22151		5.53981		0.942543				8.30261		8.2859		1.00202
	613.632		456.244		1.34496				550.684		602.021		0.914725						4.02201		5.53981		0.726019				7.58488		8.2859		0.915396
	441.04		456.244		0.966676				494.161		602.021		0.820836						3.46968		5.53981		0.626317				6.14305		8.2859		0.741385
	442.889		456.244		0.97073				493.033		602.021		0.818964						3.53945		5.53981		0.638912				7.969		8.2859		0.961753
341.555	339.962	367.782	436.382	0.782698	0.779048	0.842799		882.541	595.2	657.705	596.607	1.47927	0.997641	1.10241				5.77417	4.86629	5.39952	5.90184	0.978367	0.824537	0.914887		13.2421	10.2248	7.77884	5.45014	1.32314	1.08371	0.744007
452.642	355.813	340.022	436.382	1.03726	0.81537	0.779183		686.95	584.946	642.194	596.607	1.15143	0.980454	1.07641				8.20772	4.45844	4.94569	5.90184	1.39071	0.755432	0.837991		6.38761	5.97332	6.89584	5.45014	1.22156	0.922992	0.743936
432.369	413.985	245.943	436.382	0.990803	0.948676	0.563596		664.749	545.964	594.816	596.607	1.11421	0.915114	0.996997				8.66861	3.67391	3.84207	5.90184	1.4688	0.622502	0.650995		5.67012	5.33567	5.88891	5.45014	0.988963	0.844016	0.743215
518.143	406.524	434.355	436.382	1.18736	0.931577	0.995355		649.954	542.735	561.161	596.607	1.08942	0.909703	0.940586				5.88443	4.21383	5.58503	5.90184	0.997051	0.713985	0.94632		5.06668	5.04534	5.46011	5.45014	0.983917	0.834762	0.628497
518.878	455.195	421.756	436.382	1.18905	1.04311	0.966483		638.187	542.662	555.469	596.607	1.06969	0.90958	0.931046				5.53014	4.9667	2.51172	5.90184	0.937019	0.841551	0.425582		5.05318	4.50153	5.41537	5.45014	0.922915	0.739767	0.604684
497.61	461.014	359.87	436.382	1.14031	1.05644	0.824669		562.055	530.345	540.903	596.607	0.942085	0.888935	0.906632				7.90647	3.55323	2.65564	5.90184	1.33966	0.602055	0.449969		4.74913	4.41435	5.28812	5.45014	0.885606	0.73846	0.557548
497.612	346.39	361.579	436.382	1.14031	0.793777	0.828584		557.092	529.894	535.923	596.607	0.933766	0.888179	0.898285				7.15014	3.01535	1.6974	5.90184	1.21151	0.510918	0.287606		4.6887	4.38937	4.6327	5.45014	0.817079	0.719893	0.534678
343.288	381.499	378.935	436.382	0.78667	0.874232	0.868355		543.264	528.033	535.426	596.607	0.910589	0.88506	0.897451				7.61925	3.20634	4.74941	5.90184	1.291	0.543279	0.804734		4.47529	4.15495	3.75574	5.45014	0.742435	0.59773	0.453578
534.727	353.82	376.322	436.382	1.22537	0.810803	0.862367		540.503	523.74	518.954	596.607	0.905961	0.877864	0.869841				3.83167	5.29468	5.80945	5.90184	0.649234	0.897124	0.984346		4.01256	3.70559	3.62357	5.45014	0.638525	0.589751	0.34573
389.881	345.522	397.598	436.382	0.89344	0.791789	0.911123		529.308	502.911	483.305	596.607	0.887197	0.842952	0.81009				5.35562	2.07281	4.21914	5.90184	0.907448	0.351214	0.714886		3.63423	3.38639	3.34572	5.45014	0.621754	0.476722	0.19644
319.151	321.359		436.382	0.731357	0.736417			460.624	488.88	437.001	596.607	0.772072	0.819433					5.87915	2.7491		5.90184	0.996155	0.465803			2.97184	3.04432	1.48158	5.45014	1.60064	0.462971
381.546	338.089		436.382	0.874339	0.774755			444.063	486.812		596.607	0.744314	0.815968					1.88113	4.34295		5.90184	0.318736	0.735863			5.45014	2.95994		5.45014	1.02202	0.38796
539.966	332.103		436.382	1.23737	0.761037			596.607	473.432		596.607	1.29783	0.793541					3.03544	4.57443		5.90184	0.514321	0.775085				2.21201		5.45014	0.517928
435.639			436.382	0.998297														5.90184	3.23072		5.90184	1	0.547409
396.038			436.382	0.907548															4.72974
483.954			436.382	1.10901
335.497			436.382	0.768814
436.382			436.382
726.006	717.871	486.86	484.933	1.49713	1.48035	1.00397		1104.38	859.719	874.858	942.086	1.17227	0.912569	0.928639				7.54827	6.87439	4.12408	5.72252	1.31905	1.20129	0.720675		4.15655	2.78496	2.8026	2.26846	1.83232	1.22769	1.23547
448.637	539.523	467.735	484.933	0.925154	1.11257	0.964535		1087.09	686.608	580.449	942.086	1.15392	0.728817	0.616132				6.12955	6.15372	3.81534	5.72252	1.07113	1.07535	0.666724		3.25851	2.21337	1.68382	2.26846	1.43644	0.975715	0.742277
435.784	471.327	462.331	484.933	0.898648	0.971942	0.953393		1035.5	663.73	577.888	942.086	1.09916	0.704532	0.613413				5.86343	3.94047	2.6279	5.72252	1.02462	0.68859	0.459221		1.58327	1.35871	1.53183	2.26846	0.69795	0.598958	0.675273
407.949	464.018	423.407	484.933	0.841249	0.956871	0.873125		750.621	646.351	571.843	942.086	0.796764	0.686085	0.606996				5.60192	2.8355	2.35565	5.72252	0.978925	0.495498	0.411646		1.26433	1.33778	1.48023	2.26846	0.557351	0.589733	0.652525
406.287	431.668	381.711	484.933	0.837821	0.89016	0.787141		732.836	587.295	560.558	942.086	0.777886	0.623398	0.595018				3.46943	2.41458	1.03836	5.72252	0.606277	0.421944	0.181451		1.07963	0.873408	0.818638	2.26846	0.475932	0.385023	0.360879
484.933		353.929	484.933			0.729852		942.086		558.152	942.086			0.592463				5.72252								2.26846		0.764847	2.26846	1		0.337166
[truncated: 2 more columns]

## Sheet: Figure 6F_Raw data and normaliz
Ctrl_GPN								LatA_GPN								Noco_GPN										Ctrl_γ2								LatA_γ2										Noco_γ2
Source	mean intensity	intensity of per neuron	number	length	puncta number of per 10 μm	puncta number of per neuron		Source	mean intensity	intensity of per neuron	number	length	puncta number of per 10 μm	puncta number of per neuron		Source	mean intensity	intensity of per neuron	number	length	puncta number of per 10 μm	puncta number of per neuron				Source	mean intensity	intensity of per neuron	number	length	puncta number of per 10 μm	puncta number of per neuron		Source	mean intensity	intensity of per neuron	number	length	puncta number of per 10 μm	puncta number of per neuron				Source	mean intensity	intensity of per neuron	number	length	puncta number of per 10 μm
MAX_1-S-2.nd2:0002-0502-0649	758.468		24	32.968	7.27979			MAX_2-S-2.nd2:0002-0512-0595	469.226		16	31.787	5.0335			MAX_1-T-2.nd2:0002-0512-0636	307.617		11	32.235	3.41244					MAX_1-S-1.nd2:0002-0502-0649	469.385		24	32.968	7.27979			MAX_2-S-1.nd2:0002-0512-0595	467.035		13	31.787	4.08972					MAX_1-T-1.nd2:0002-0512-0636	418.066		12	32.235	3.72266
MAX_1-P-2.nd2:0002-0584-0512	667.146	712.807	30	32	9.375	8.32739		MAX_2-P-1.nd2:0002-0512-0570	315.298	392.262	12	31.917	3.75975	4.39663		MAX_1-S-2.nd2:0002-0671-0512	340.307	323.358	7	33.139	2.11231					MAX_1-P-1.nd2:0002-0584-0512	573.096	521.24	37	32	11.5625	9.42114		MAX_2-P-1.nd2:0002-0512-0570	466.45	466.743	16	31.917	5.013	4.55136				MAX_1-S-1.nd2:0002-0671-0512	452.613		12	33.139	3.62111
MAX_3-T-2.nd2:0002-0512-0615	605.9		14	34.768	4.02669			MAX_1-T-2.nd2:0002-0512-0593	322.341		5	31.489	1.58786			MAX_1-P-2.nd2:0002-0512-0717	322.15		6	42.039	1.42725	2.31733				MAX_3-T-1.nd2:0002-0512-0615	576.397		16	34.768	4.60193			MAX_1-T-1.nd2:0002-0512-0593	401.148		12	31.489	3.81085					MAX_1-P-1.nd2:0002-0512-0717	432.468	434.382	17	42.039	4.04386
MAX_3-S-2.nd2:0002-0512-0736	482.074		16	35.306	4.53181			MAX_1-S-1.nd2:0002-0422-0512	506.784		25	53.853	4.64227			MAX_2-T-1.nd2:0002-0494-0579	409.569		9	40.703	2.21114					MAX_3-S-1.nd2:0002-0512-0736	365.96		3	35.306	0.849714			MAX_1-S-2.nd2:0002-0422-0512	472.14		28	53.853	5.19934					MAX_2-T-2.nd2:0002-0494-0579	415.316		9	40.703	2.21114
MAX_3-P-2.nd2:0002-0512-0659	805.145		24	41.114	5.83743			MAX_1-P-2.nd2:0002-0512-0631	422.935	417.353	6	31.716	1.89179	2.7073		MAX_2-S-1.nd2:0002-0609-0512	341.47		4	30.884	1.29517					MAX_3-P-1.nd2:0002-0512-0659	509.226		17	41.114	4.13484			MAX_1-P-1.nd2:0002-0512-0631	165.833	346.374	3	31.716	0.945895	3.3187				MAX_2-S-2.nd2:0002-0609-0512	356.124		2	30.884	0.647585
MAX_3-F-2.nd2:0002-0512-0705	569.392	615.628	15	31.213	4.80569	4.8004		MAX_3-T-1.nd2:0002-0512-0651	448.617		7	44.773	1.56344			MAX_2-P-1.nd2:0002-0512-0556	369.328		7	32.612	2.14645					MAX_3-F-1.nd2:0002-0512-0705	339.866	447.862	9	31.213	2.88341	3.11748		MAX_3-T-1.nd2:0002-0512-0651	452.131		8	44.773	1.78679					MAX_2-P-2.nd2:0002-0512-0556	407.31		10	32.612	3.06636
MAX_2-S-2.nd2:0002-0512-0265	409.546		11	31.753	3.46424			MAX_3-S-2.nd2:0002-0512-0729	603.835		24	31.661	7.5803			MAX_2-F-1.nd2:0002-0512-0714	356.696	369.266	4	31.505	1.26964	1.7306				MAX_2-S-1.nd2:0002-0512-0265	412.088		8	31.753	2.51945			MAX_3-S-1.nd2:0002-0512-0729	499.624		18	31.661	5.68523					MAX_2-F-2.nd2:0002-0512-0714	372.84	387.897	6	31.505	1.90446
MAX_2-P-2.nd2:0002-0512-0599	540.932	475.239	17	36.039	4.71711	4.09068		MAX_3-P-2.nd2:0002-0512-0489	407.747	486.733	14	34.652	4.04017	4.39464		MAX_3-T-1.nd2:0002-0512-0685	225.116		2	32.237	0.620405					MAX_2-P-1.nd2:0002-0512-0599	468.534	440.311	15	36.039	4.16216	3.3408		MAX_3-P-1.nd2:0002-0512-0489	378.684	443.48	22	34.652	6.34884	4.60695				MAX_3-T-2.nd2:0002-0512-0685	369.106		4	32.237	1.24081
MAX_6-T-2.nd2:0002-0512-0524	650.13		24	35.116	6.83449			MAX_4-S-2.nd2:0002-0552-0512	355.342		10	56.191	1.77964			MAX_3-S-1.nd2:0002-0542-0512	205		4	30.668	1.30429					MAX_6-T-1.nd2:0002-0512-0524	497.751		16	35.116	4.55633			MAX_4-S-1.nd2:0002-0552-0512	371.071		11	56.191	1.95761					MAX_3-S-2.nd2:0002-0542-0512	381.246		11	30.668	3.5868
MAX_6-S-2.nd2:0002-0389-0512	785.76		28	31.539	8.8779			MAX_4-P-2.nd2:0002-0548-0512	550.377		15	30.706	4.88504			MAX_3-P-1.nd2:0002-0456-0512	266.867	232.328	13	30.198	4.30492	2.07654				MAX_6-S-1.nd2:0002-0389-0512	661.011		21	30.955	6.78404			MAX_4-P-1.nd2:0002-0548-0512	512.235		12	30.706	3.90803					MAX_3-P-1.nd2:0002-0456-0512	367.788	372.713	18	30.198	5.96066
MAX_6-P-2.nd2:0002-0512-0561	1166.56		12	31.856	3.76695			MAX_4-F-2.nd2:0002-0512-0636	392.333	432.684	4	30.939	1.29287	2.65252		MAX_4-T-1.nd2:0002-0370-0512	209.765		1	31.761	0.314852					MAX_6-S-1.nd2:0002-0392-0512	602.931	587.231	21	31.702	6.62419	5.98819		MAX_4-F-1.nd2:0002-0512-0636	450.818	444.708	6	30.939	1.9393	2.60165				MAX_4-T-2.nd2:0002-0370-0512	362.092		5	31.761	1.57426
MAX_6-F-2.nd2:0002-0512-0729	511.476		18	30.955	5.81489			MAX_5-T-2.nd2:0002-0590-0512	588.712		13	31.037	4.18855			MAX_4-S-1.nd2:0002-0512-0557	351.039		2	31.256	0.639877					MAX_5-T-1.nd2:0002-0512-0647	446.99		16	34.39	4.65252			MAX_5-T-1.nd2:0002-0590-0512	562.91		19	31.037	6.12173					MAX_4-S-2.nd2:0002-0512-0557	543.491		15	31.256	4.79908
MAX_6-S-2.nd2:0002-0392-0512	786.81	780.147	18	31.702	5.67788	6.19442		MAX_5-S-2.nd2:0002-0472-0512	620.864		12	31.24	3.84123			MAX_4-P-1.nd2:0002-0512-0702	304.959		4	48.219	0.829549					MAX_5-P-1.nd2:0002-0512-0443	708.223		24	31.684	7.5748			MAX_5-S-1.nd2:0002-0472-0512	593.287		17	31.24	5.44174					MAX_4-P-2.nd2:0002-0512-0702	416.861		18	48.219	3.73297
MAX_4-T-2.nd2:0002-0512-0564	779.408							MAX_5-P-1.nd2:0002-0538-0512	476.212	561.929	12	31.323	3.83105	3.95361		MAX_4-F-1.nd2:0002-0520-0512	412.851	319.654	10	62.562	1.59841	0.845673				MAX_5-S-1.nd2:0002-0512-0459	542.508	565.907	20	30.04	6.65779	6.29504		MAX_5-P-1.nd2:0002-0538-0512	481.494	545.897	12	31.323	3.83105	5.13151				MAX_4-F-2.nd2:0002-0520-0512	584.649	476.773	43	62.562	6.87318
MAX_4-S-1-2.nd2:0002-0507-0789	584.431		20	31.763	6.29663			MAX_6-S-1.nd2:0002-0504-0550	660.331		8	30.585	2.61566			MAX_5-T-1.nd2:0002-0512-0726	183.204		2	31.339	0.638182					MAX_4-S-2-1.nd2:0002-0507-0789	554.516		10	31.763	3.14832			MAX_6-S-2.nd2:0002-0504-0550	575.602		10	30.585	3.26958					MAX_5-T-2.nd2:0002-0512-0726	335.724		6	31.339	1.91455
MAX_4-T-2.nd2:0002-0512-0672	769.501		21	36.234	5.79566			MAX_6-P-2.nd2:0002-0512-0540	565.235	612.783	8	31.223	2.56221	2.58894		MAX_5-S-1.nd2:0002-0312-0517	334.405		3	31.329	0.957579					MAX_4-S-2-1.nd2:0002-0507-0789	529.673		10	31.763	3.14832			MAX_6-P-1.nd2:0002-0512-0540	612.811	594.207	11	31.223	3.52304	3.39631				MAX_5-S-2.nd2:0002-0312-0517	524.858		11	31.329	3.51112
MAX_4-P-2.nd2:0002-0512-0619	1143.09	819.109	25	31.562	7.92092	6.67107		MAX_7-T-2.nd2:0002-0512-0542	312.7		3	31.678	0.947029			MAX_5-P-1.nd2:0002-0512-0696	341.531	286.38	6	30.844	1.94527	1.18034				MAX_4-T-1.nd2:0002-0512-0564	575.183		20	31.378	7.64867			MAX_7-T-1.nd2:0002-0512-0542	333.562		6	31.678	1.89406					MAX_5-P-2.nd2:0002-0512-0696	588.959	483.18	15	30.844	4.86318
MAX_5-P-2.nd2:0002-0512-0443	1219.78		34	31.684	10.731			MAX_7-S-2.nd2:0002-0616-0512	535.885		12	31.113	3.85691			MAX_6-T-1.nd2:0002-0436-0512	181.337		0	31.99						MAX_4-P-1.nd2:0002-0512-0619	631.083		23	36.234	6.34763	5.71487		MAX_7-S-1.nd2:0002-0616-0512	511.006		14	31.113	4.49973					MAX_6-T-2.nd2:0002-0436-0512	477.274		7	31.99	2.18818
MAX_5-S-2-1.nd2:0002-0512-0459	776.288		23	30.04	7.65646			MAX_7-P-1.nd2:0002-0512-0547	612.177		17	38.566	4.40803			MAX_6-S-1.nd2:0002-0609-0512	263.969		7	30.604	2.28728					MAX_4-T-1.nd2:0002-0512-0672	576.102	573.311						MAX_7-P-1.nd2:0002-0512-0547	621.921		15	38.566	3.88944					MAX_6-S-2.nd2:0002-0609-0512	438.488		12	30.604	3.92106
MAX_5-T-2.nd2:0002-0512-0647	700.096	898.722	22	34.39	6.39721	8.26154		MAX_7-F-1.nd2:0002-0561-0512	292.887	438.412	5	30.408	1.6443	2.71407		MAX_6-P-1.nd2:0002-0304-0512	230.826		1	31.113	0.321409					MAX_6-P-1.nd2:0002-0512-0561	741.034		27	31.539	8.56083			MAX_7-F-1.nd2:0002-0561-0512	284.618	437.777	3	30.408	0.986582	2.81745				MAX_6-P-2.nd2:0002-0304-0512	416.956		5	31.113	1.60705
MAX_8-P-2.nd2:0002-0451-0512	855.747		15	33.285	4.50653			MAX_8-T-2.nd2:0002-0512-0545	387.748		7	30.328	2.3081			MAX_6-F-1.nd2:0002-0570-0512	239.155	228.822	3	33.787	0.887915	1.16554				MAX_6-F-1.nd2:0002-0512-0729	392.49	566.762	5	31.856	1.56956	5.0652		MAX_8-T-1.nd2:0002-0512-0545	454.112		8	30.328	2.63783					MAX_6-F-2.nd2:0002-0570-0512	536.13	467.212	7	33.787	2.0718
MAX_8-T-2.nd2:0002-0439-0512	687.018		26	32.665	7.95959	6.23306		MAX_8-S-2.nd2:0002-0512-0420	478.5	433.124	7	44.272	1.58113	1.94462		MAX_7-T-1.nd2:0002-0512-0656	359.636		8	34.668	2.3076					MAX_8-P-1.nd2:0002-0451-0512	544.296		34	31.276	10.871			MAX_8-S-1.nd2:0002-0512-0420	465.968	460.04	7	44.272	1.58113	2.10948				MAX_7-T-2.nd2:0002-0512-0656	553.002		15	34.668	4.32676
MAX_8-S-2.nd2:0002-0512-0674	644.553		32	31.672	10.1036			MAX_9-T-2.nd2:0002-0514-0645	323.488		4	36.646	1.09152			MAX_7-P-1.nd2:0002-0461-0512	219.422	289.529	7	32.399	2.16056	2.23408				MAX_8-T-1.nd2:0002-0439-0512	383.833		13	32.759	3.96838			MAX_9-T-1.nd2:0002-0514-0645	402.802		9	36.646	2.45593					MAX_7-P-2.nd2:0002-0461-0512	433.03	493.016	10	32.399	3.08652
MAX_8-F-2.nd2:0002-0512-0659	598.338	696.414	35	58.515	5.98137			MAX_9-S-2.nd2:0002-0512-0589	436.279		10	43.006	2.32526			MAX_8-T-1.nd2:0002-0317-0512	253.742		6	48.37	1.24044					MAX_8-S-1.nd2:0002-0512-0674	416.902		20	34.092	5.86648			MAX_9-S-1.nd2:0002-0512-0589	502.311		12	43.006	2.79031					MAX_8-T-2.nd2:0002-0317-0512	317.602		14	48.37	2.89436
MAX_7-T-2.nd2:0002-0612-0512	835.86		26	31.408	8.27815	8.12103		MAX_9-P-2.nd2:0002-0512-0537	411.718	390.495	9	31.309	2.87457	2.09712		MAX_8-S-1.nd2:0002-0594-0512	267.632		4	41.417	0.965787					MAX_8-F-1.nd2:0002-0512-0659	368.352	428.346	10	33.797	2.95884	5.91616		MAX_9-P-1.nd2:0002-0512-0537	464.925	456.679	11	31.309	3.51337	2.91987				MAX_8-S-2.nd2:0002-0594-0512	313.876		2	30.504	0.655652
MAX_7-P-2.nd2:0002-0512-0569	762.423	799.141	27	47.106	5.73175											MAX_8-P-1.nd2:0002-0531-0512	418.199		2	32.202	0.621079	0.942435				MAX_7-T-1.nd2:0002-0612-0512	542.674		17	33.285	5.10741													MAX_8-P-2.nd2:0002-0531-0512	458.85		17	41.417	4.10459
MAX_10-T-2.nd2:0002-0508-0512	671.21		38	31.582	12.0322	8.88196										MAX_8-F-1.nd2:0002-0641-0512	227.776	291.837	11	30.496	3.60703					MAX_7-P-1.nd2:0002-0512-0569	480.927	511.8	10	32.665	3.06138													MAX_8-F-2.nd2:0002-0641-0512	262.821	338.287	2	32.202	0.621079
MAX_10-S-2.nd2:0002-0562-0512	712.416		23	31.276	7.35388											MAX_9-T-1.nd2:0002-0383-0506	329.491		14	31.544	4.43824					MAX_10-T-1.nd2:0002-0508-0512	336.712		6	31.672	1.89442	3.09351												MAX_9-T-2.nd2:0002-0383-0506	295.148		9	30.496	2.95121
MAX_10-P-2.nd2:0002-0512-0602	857.261	746.962	13	33.797	3.8465											MAX_9-P-1.nd2:0002-0512-0579	558.229		19	40.622	4.67727	4.24085				MAX_10-S-1.nd2:0002-0562-0512	402.943		19	58.515	3.24703													MAX_9-P-2.nd2:0002-0512-0579	448.203		16	31.544	5.07228
MAX_9-S-2.nd2:0002-0754-0512	490.119		37	32.759	11.2946											MAX_9-S-1.nd2:0002-0512-0536	495.096	460.939	10	31.934	3.13146					MAX_10-P-1.nd2:0002-0512-0602	429.408	389.688	13	31.408	4.13907	3.09351												MAX_9-S-2.nd2:0002-0512-0536	384.245	375.865	21	40.622	5.16961
MAX_9-P-2.nd2:0002-0512-0581	835.463	662.791	27	34.092	7.91975	7.60368										MAX_10-T-1.nd2:0002-0512-0714	632.966		5	31.452	1.58972					MAX_9-S-1.nd2:0002-0754-0512	258.792		11	47.106	2.33516													MAX_10-T-2.nd2:0002-0512-0714	450.206		7	31.934	2.19202
																MAX_10-P-1.nd2:0002-0599-0512	320.426		21	42.734	4.91412					MAX_9-P-1.nd2:0002-0512-0581	403.679	331.236	45	31.582	14.2486	8.29189												MAX_10-P-2.nd2:0002-0599-0512	311.896		8	31.452	2.54356
																MAX_10-F-1.nd2:0002-0505-0636	562.301		6	33.289	1.8024	2.85942																						MAX_10-F-2.nd2:0002-0505-0636	527.618		24	42.734	5.61614
																MAX_10-S-1.nd2:0002-0602-0512	470.631	496.581																										MAX_10-S-2.nd2:0002-0602-0512	349.469	409.797	6	33.289	1.8024
MAX_5-T-2.nd2:0002-0512-0525	582.507		15	60.853	2.46496			MAX_16-T-1.nd2:0002-0580-0512	539.097		11	3.50441				MAX_3-T-2.nd2:0002-0512-0515	600.778		9	32.092	2.80444					MAX_1-F-1.nd2:0001-0512-0687	334.58							MAX_1-F-1.nd2:0001-0512-0461	443.275		13	29.064	4.47289					MAX_1-P-1.nd2:0001-0512-0460	514.734		24	31.512	7.61615
MAX_5-S-2.nd2:0002-0391-0512	642.706		24	30.896	7.768			MAX_16-S-1.nd2:0003-0512-0416	425.882		28	6.04438				MAX_3-S-2.nd2:0512-0595	545.382		7	37.127	1.88542					MAX_1-F1-1.nd2:0001-0512-0650	448.831		5	40.85	1.22399			MAX_1-P-1.nd2:0001-0512-0715	599.722	521.499	35	30.61	11.4342					MAX_1-S-1.nd2:0001-0512-0557	397.421		23	38.465	5.97946
MAX_5-P-2.nd2:0002-0512-0727	541.358	588.857	15	50.153	2.99085	4.40793		MAX_16-P-1.nd2:0002-0487-0512	534.966		41	13.054				MAX_3-P-2.nd2:0002-0512-0460	640.649		17	31.709	5.36125					MAX_1-P-1.nd2:0001-0483-0512	559.285		21	31.474	6.67217			MAX_1-S-1.nd2:0001-0512-0566	388.495		23	31.023	7.41385	7.77364				MAX_1-T-1.nd2:0001-0512-0704	415.813	442.656	13	58.002	2.2413
MAX_4-S-1.nd2:0002-0512-0481	378.759		3	31.084	0.965127			MAX_16-P1-1.nd2:0002-0512-0556	389.494	472.36	19	5.73308	7.08397			MAX_3-F-1.nd2:0002-0541-0512	349.666	534.119	3	40.167	0.746882	2.6995				MAX_1-T-1.nd2:0001-0512-0558	473.932	454.157	17	63.081	2.69495	3.04031		MAX_1-T-1.nd2:0001-0538-0474	378.417		9	31.243	2.88065					MAX_2-P-1.nd2:0001-0512-0480	327.313		8	31.003	2.5804
MAX_4-P-2.nd2:0002-0512-0497	334.072	356.416	11	31.668	3.47354	2.21933		MAX_15-T-1.nd2:0002-0512-0484	636.985		17	5.468				MAX_2-T1-1.nd2:0002-0512-0517	480.034		8	38.059	2.102					MAX_2-P-1.nd2:0001-0512-0608	376.659		9	31.495	2.8576			MAX_1-T1-1.nd2:0001-0512-0588	557.159	441.357	8	45.109	1.77348	2.32706				MAX_2-S-1.nd2:0001-0504-0505	300.469		11	31.62	3.47881
MAX_3-T1-2.nd2:0002-0626-0448	565.253		15	26.036	5.76125			MAX_15-S-2.nd2:0002-0512-0713	538.289		20	2.96437				MAX_2-P-1.nd2:0002-0747-0512	476.152		7	31.727	2.20632					MAX_2-S-1.nd2:0001-0451-0512	391.454		14	35.386	3.95637			MAX_2-F-1.nd2:0001-0512-0555	371.305		5	32.047	1.56021					MAX_2-T-1.nd2:0001-0527-0512	321.82	316.534	7	30.579	2.28915
MAX_3-T-2.nd2:0002-0512-0548	605.277		20	47.341	4.22467			MAX_15-P-1.nd2:0002-0512-0636	638.541	604.605	10	2.3265	3.58629			MAX_2-T-1.nd2:0002-0512-0530	449.571		11	31.88	3.45044	2.58625				MAX_2-T-1.nd2:0001-0219-0521	367.145	378.419	10	39.363	2.54046	3.11814		MAX_2-P-1.nd2:0001-0512-0532	553.791		18	31.766	5.66644					MAX_3-F-1.nd2:0001-0516-0512	327.881		5	32.673	1.53032
MAX_3-S-2.nd2:0002-0512-0477	670.366		23	31.396	7.32577			MAX_14-T-2.nd2:0002-0512-0674	641.833		17	4.34283				MAX_2-P-2.nd2:0002-0747-0512	519.646									MAX_3-P-1.nd2:0001-0512-0740	508.61		52	59.002	8.81326			MAX_2-S-1.nd2:0001-0512-0509	454.319		5	31.331	1.59586					MAX_3-P-1.nd2:0001-0499-0512	247.903		7	31.675	2.20994
MAX_3-P1-2.nd2:0002-0327-0512	429.901		22	31.813	6.91541			MAX_14-S-2.nd2:0002-0490-0512	537.258		11	3.3958				MAX_2-S-1.nd2:0002-0512-0539	462.797	477.041	7	32.153	2.17709					MAX_3-S-1.nd2:0001-0512-0769	341		7	31.79	2.20195			MAX_2-T-1.nd2:0001-0479-0512	357.255	434.168	6	33.068	1.81444	2.65924				MAX_3-S-1.nd2:0001-0487-0512	399.424	325.069	9	32.407	2.77718
MAX_3-P-2.nd2:0002-0567-0512	639.355		29	39.289	7.3812	6.02231		MAX_14-P-2.nd2:0002-0512-0525	508.079		10	3.49491				MAX_1-P-1.nd2:0002-0512-0523	646.628		12	30.644	3.91594					MAX_3-ST-1.nd2:0001-0512-0698	407.601	419.07	9	31.372	2.8688	4.628		MAX_3-F-1.nd2:0001-0414-0512	337.053		10	32.654	3.06241					MAX_3-S1-1.nd2:0001-0531-0512	401.086		5	64.133	0.77963
MAX_3-F-2.nd2:0002-0512-0569	564.163	579.053	15	33.145	4.52557			MAX_14-F-1.nd2:0002-0453-0571	581.178	567.087	10	3.32358				MAX_1-S-2.nd2:0002-0500-0512	487.907		19	32.035	5.93101	4.00801				MAX_4-F-1.nd2:0001-0517-0500	493.19		26	34.202	7.60189			MAX_3-P-1.nd2:0001-0440-0512	749.657		29	32.316	8.97388					MAX_3-T-1.nd2:0001-0488-0512	348.686	374.886	8	32.003	2.49977
MAX_2-P1-2.nd2:0002-0662-0512	539.276		26	29.943	8.68316			MAX_13-S-2.nd2:0002-0634-0512	386.806		12	3.78824	3.66907			MAX_1-T-1.nd2:0002-0408-0512	671.243	601.926	15	36.281	4.1344					MAX_4-P-1.nd2:0001-0484-0689	462.01		11	26.853	4.09638			MAX_3-S-1.nd2:0001-0431-0512	506.98	531.23	8	31.733	2.52103	4.85244				MAX_4-P-1.nd2:0001-0445-0512	455.126		14	32.292	4.33544
MAX_2-P-2.nd2:0002-0488-0512	614.012	576.644	20	33.076	6.04668	7.36492		MAX_13-P-2.nd2:0002-0525-0512	267.332	327.069	5	1.30849				MAX_14-T-1.nd2:0002-0512-0496	326.635		8	32.743	2.44327					MAX_4-P1-1.nd2:0001-0493-0512	516.02	490.407	52	31.017	16.765	9.48776		MAX_4-P-1.nd2:0001-0522-0512	707.17		31	31.511	9.83783					MAX_4-S-1.nd2:0001-0563-0485	453.567		11	30.251	3.63624
MAX_1-T-1.nd2:0002-0512-0454	623.115		25	31.378	7.96737			MAX_12-T-2.nd2:0002-0512-0555	580.363							MAX_14-S1-1.nd2:0002-0490-0512	275.52		7	44.028	1.5899					MAX_4-S-1.nd2:0001-0319-0512	488.208		24	34.147	7.02844			MAX_4-S-1.nd2:0001-0512-0486	734.88	721.025	16	31.559	5.06987	7.45385				MAX_4-T-1.nd2:0001-0495-0512	459.627	456.107	8	32.041	2.4968
MAX_1-S1-2.nd2:0002-0512-0530	625.606		23	30.735	7.48333			MAX_12-S-2.nd2:0002-0674-0512	406.077							MAX_14-S-1.nd2:0002-0404-0512	281.042		9	30.788	2.92322					MAX_4-S1-1.nd2:0001-0700-0512	857.63							MAX_5-F-1.nd2:0001-0512-0483	350.097		12	31.796	3.77406					MAX_5-P-1.nd2:0001-0520-0512	360.821		13	44.209	2.94058
MAX_1-S-2.nd2:0002-0512-0557	781.854		30	38.723	7.74733			MAX_12-F-2.nd2:0002-0512-0492	492.025	492.822	4	0.726282				MAX_14-P-1.nd2:0002-0291-0512	271.153	288.587	10	30.993	3.22654	2.54573				MAX_4-S1-1.nd2:0001-0700-0512	658.957		26	30.913	8.4107			MAX_5-S-1.nd2:0001-0512-0612	503.055		7	31.662	2.21085					MAX_5-S-1.nd2:0001-0425-0512	307.486	334.154	5	32.049	1.56011
MAX_1-P2-2.nd2:0002-0499-0512	700.282		30	30.963	9.68898			MAX_11-T-3.nd2:0002-0512-0527	502.342		12	3.76719				MAX_13-T-2.nd2:0002-0460-0512	358.158		6	33.4	1.79641					MAX_4-T-1.nd2:0001-0803-0512	628.23	658.256	31	31.453	9.85598	6.93021		MAX_5-T-1.nd2:0001-0512-0661	526.466	459.873	14	31.813	4.40072	3.46188				MAX_6-P-1.nd2:0001-0466-0512	431.212		7	32.153	2.17709
MAX_1-P1-2.nd2:0002-0512-0556	507.594		19	31.045	6.12015			MAX_11-S-2.nd2:0002-0512-0670	692.939		10	2.28462				MAX_13-S-1.nd2:0002-0512-0719	295.626		7	30.393	2.30316					MAX_5-P-1.nd2:0001-0583-0512	532.001		14	57.715	2.42571			MAX_6-F-1.nd2:0001-0512-0482	263.676		5	32.997	1.51529					MAX_6-S-1.nd2:0001-0486-0512	402.371		8	32.042	2.49672
MAX_1-p-2.nd2:0002-0512-0529	469.766		31	30.922	10.0252			MAX_11-P-2.nd2:0002-0512-0639	368.221		12	3.80795				MAX_13-P1-1.nd2:0002-0418-0512	383.606		8	31.208	2.56345					MAX_5-S-1.nd2:0001-0483-0512	379.245	455.623	9	31.924	2.8192	2.62245		MAX_6-P-1.nd2:0001-0512-0536	407.92		6	34.519	1.73817					MAX_6-T-1.nd2:0001-0483-0551	305.412	379.665	12	30.509	3.93327
MAX_1-F-2.nd2:0002-0543-0512	582.683	612.986	22	31.312	7.02606	8.17206		MAX_11-F1-2.nd2:0002-0485-0512	574.848		13	3.98638				MAX_13-F-2.nd2:0002-0348-0512	405.333	360.681	4	34.837	1.1482	1.9528				MAX_6-P-1.nd2:0001-0512-0306	391.506		31	66.409	4.66804			MAX_6-S-1.nd2:0001-0512-0564	431.844		1
MAX_7-P-2.nd2:0002-0512-0499	609.015		12	31.143	3.85319			MAX_11-F-2.nd2:0002-0512-0467	569.776	541.625	4	1.26231	3.02169			MAX_12-T-2.nd2:0002-0533-0512	334.837									MAX_6-S-1.nd2:0001-0482-0512	255.197		7	32.233	2.17169			MAX_6-T-1.nd2:0001-0493-0512	436.222	384.916	9	31.504	2.85678	2.03675
MAX_7-F1nd2-2.nd2:0002-0512-0536	645.137		11	32.462	3.38858			MAX_10-T-2.nd2:0002-0405-0512	568.658		5	1.04236				MAX_12-F-1.nd2:0002-0512-0476	311.783									MAX_6-T-1.nd2:0001-0512-0485	303.669	316.791	8	31.736	2.5208	3.12018
MAX_7-S-2.nd2:0002-0512-0734	389.779		5	40.364	1.23873	2.82683		MAX_10-S-2.nd2:0002-0512-0690	587.781		11	3.52169				MAX_12-S-1.nd2:0002-0512-0425	357.457		4	32.218	1.24154
MAX_7-F-2.nd2:0002-0512-0496	536.052	544.996	20	31.375	6.3745			MAX_10-P-3.nd2:0002-0512-0805	412.35		13	2.98871				MAX_12-P-1.nd2:0002-0512-0490	386.792	347.717	9	30.728	2.92892	2.08523
MAX_6-T-2.nd2:0002-0442-0512	803.743		22	30.948	7.1087			MAX_10-F-2.nd2:0002-0503-0537	566.449	533.809	7	2.09418	2.41174			MAX_11-T-1.nd2:0002-0474-0512	670.655		8	31.635	2.52884
MAX_6-S-2-2.nd2:0002-0525-0512	879.442		16	31.265	5.11754			MAX_9-P1-2.nd2:0002-0512-0544	291.917		6	1.93199				MAX_11-S-1.nd2:0002-0452-0512	542.716		8	31.546	2.53598					MAX_5-T-1.nd2:0002-0547-0447	293.671		7	60.853	1.15031			MAX_16-T-1.nd2:0002-0572-0512	244.869		1	0.318583						MAX_3-T-1.nd2:0002-0512-0515	377.382		6	32.092	1.86962
MAX_6-P-2.nd2:0002-0495-0512	795.871		11	33.709	3.26322	5.46599		MAX_9-P-2.nd2:0002-0639-0512	374.792	333.354	19	3.13495	2.53347			MAX_11-P-1.nd2:0002-0571-0512	397.752	537.041	10	33.076	3.02334	2.69605				MAX_5-S-1.nd2:0002-0391-0512	348.678		11	30.896	3.56033			MAX_16-S-1.nd2:0002-0512-0562	361.499		12	2.59045						MAX_3-S-1.nd2:0512-0595	368.051		6	37.127	1.61607
MAX_6-F-2.nd2:0002-0441-0512	837.938	829.249	14	54.963	2.54717			MAX_8-T-2.nd2:0002-0465-0512	316.393		7	2.12604				MAX_10-T-1.nd2:0002-0512-0468	356.892		3	32.318	0.928275					MAX_5-P-1.nd2:0002-0512-0727	348.664	330.338	17	47.461	3.58189	2.76418		MAX_16-P1-1.nd2:0002-0512-0532	265.947		13	4.13907						MAX_3-P-1.nd2:0002-0512-0460	405.858		9	31.709	2.83831
MAX_15-T-2.nd2:0002-0512-0639	322.252		26	31.327	8.29955			MAX_8-S-2.nd2:0002-0661-0512	348.37		14	1.83582				MAX_10-S1-2.nd2:0002-0512-0554	281.517		5	31.566	1.58398					MAX_4-S-1.nd2:0002-0512-0481	216.525		3	31.084	0.965127			MAX_16-P-1.nd2:0002-0489-0512	336.937	302.313	3	0.905223	1.98833					MAX_3-F-1.nd2:0002-0543-0512	383.937	383.807	5	40.167	1.2448
MAX_15-S-2.nd2:0002-0512-0464	419.869		15	48.491	3.09336			MAX_8-P-2.nd2:0002-0576-0512	251.289		5	1.48531				MAX_10-S-1.nd2:0002-0512-0480	354.557		9	32.794	2.7444					MAX_4-P-1.nd2:0002-0512-0497	275.106	245.815	4	31.668	1.2631	1.11412		MAX_15-T-1.nd2:0002-0512-0460	428.034		25	8.04117						MAX_2-T1-1.nd2:0002-0512-0621	266.29		6	38.059	1.5765
MAX_15-P-2.nd2:0002-0512-0472	608.558		7	31.278	2.23799	4.64669		MAX_8-F-2.nd2:0002-0334-0477	323.615	309.917	4	1.10035	1.63688			MAX_10-P-2.nd2:0002-0219-0512	392.51		13	31.398	4.14039					MAX_3-T1-1.nd2:0002-0626-0448	532.11		11	26.036	4.22492			MAX_15-S-1.nd2:0002-0512-0713	263.11		5	0.741092						MAX_2-T-1.nd2:0002-0512-0528	440.303		8	36.281	2.20501
MAX_15-F-2.nd2:0002-0512-0556	386.077	434.189	11	31.261	3.51876			MAX_7-T-1.nd2:0002-0379-0512	249.966		4	1.29879				MAX_10-F-2.nd2:0002-0512-0505	739.242	424.944	11	33.821	3.25242	2.52989				MAX_3-T-1.nd2:0002-0512-0548	437.658		11	47.341	2.32357			MAX_15-P-1.nd2:0002-0512-0557	362.544	362.544	7	1.62855	3.47027					MAX_2-S-1.nd2:0002-0512-0520	456.157	387.583	7	31.727	2.20632
MAX_14-T-2.nd2:0002-0430-0512	543.904		8	31.542	2.5363			MAX_7-S-2.nd2:0002-0512-0456	531.833		11	3.41806				MAX_9-F-2.nd2:0002-0512-0499	583.364		10	31.292	3.1957					MAX_3-S-1.nd2:0002-0512-0477	480.057		9	31.396	2.86661			MAX_14-T-1.nd2:0002-0512-0674	276.741		5	1.2773						MAX_1-P-1.nd2:0002-0512-0518	467.539		6	31.88	1.88206
MAX_14-S-2.nd2:0002-0512-0527	369.123		13	41.171	3.15756	3.07087		MAX_7-P-2.nd2:0002-0661-0512	555.92	445.906	30	9.33503	4.68396			MAX_9-S-2.nd2:0002-0512-0726	646.568		4	33.707	1.1867					MAX_3-P1-1.nd2:0002-0344-0512	271.651		13	31.813	4.08638			MAX_14-S-1.nd2:0002-0490-0512	334.598		5	1.54354						MAX_1-S-1.nd2:0002-0500-0512	688.582	477.956	5	32.153	1.55506
MAX_14-P-2.nd2:0002-0658-0512	425.358	446.128	7	30.921	2.26383			MAX_6-T-2.nd2:0002-0512-0461	437.691		9	2.74273				MAX_9-T-2.nd2:0002-0512-0543	534.857	588.263	5	31.052	1.6102	1.99753				MAX_3-P-1.nd2:0002-0567-0512	629.804		26	39.289	6.61763			MAX_14-P-1.nd2:0002-0512-0525	454.497		8	2.79593						MAX_1-T-1.nd2:0002-0371-0512	277.748		16	30.644	5.22125
MAX_13-T-2.nd2:0002-0501-0512	472.448		14	37.977	3.68644			MAX_6-S-2.nd2:0002-0512-0515	471.52		3	0.929167				MAX_8-T-2.nd2:0002-0493-0512	426.192		14	32.888	4.25687					MAX_3-F-1.nd2:0002-0512-0569	468.544	469.971	16	33.145	4.82727	4.15773		MAX_14-F-1.nd2:0002-0479-0557	263.071	332.227	2	0.664717	1.57037					MAX_2-P-1.nd2:0002-0747-0512	391.578		6	32.035	1.87295
MAX_13-S-2.nd2:0002-0512-0528	547.974		9	32.309	2.7856	2.91196		MAX_6-P-2.nd2:0002-0512-0542	376.789	428.667	16	5.04557	2.90582			MAX_8-P-2.nd2:0002-0512-0485	526.418		5	48.444	1.03212					MAX_2-P1-1.nd2:0002-0662-0512	405.087		13	29.943	4.34158			MAX_13-S-1.nd2:0002-0634-0512	253.542		1	0.315686						MAX_14-T-1.nd2:0002-0512-0496	349.16		11	32.743	3.3595
MAX_13-P-2.nd2:0002-0512-0535	422.135	480.852	10	54.767	1.82592			MAX_5-S-2.nd2:0002-0511-0512	615.938		7	2.24273				MAX_8-F-2.nd2:0002-0566-0512	408.046	453.552	7	42.031	1.66544	2.31814				MAX_2-P-1.nd2:0002-0488-0512	455.212	430.149	10	33.076	3.02334	3.68246		MAX_13-P-1.nd2:0002-0525-0512	221.158	237.35	1	0.261698	0.288692					MAX_14-S1-1.nd2:0002-0471-0512	359.811		10	44.028	2.27128
MAX_12-T-2.nd2:0002-0512-0488	541.3		9	35.414	2.54137			MAX_5-P1-2.nd2:0002-0512-0517	426.45		10	2.71533				MAX_7-S-2.nd2:0002-0512-0618	905.078		12	32.904	3.64697					MAX_1-T-1.nd2:0002-0512-0454	348.603		11	31.378	3.50564			MAX_12-S-1.nd2:0002-0674-0512	176.617		6	1.08942	1.08942					MAX_14-S-1.nd2:0002-0550-0512	367.616		8	30.788	2.59841
MAX_12-S-2.nd2:0002-0512-0735	558.194		14	30.855	4.53735	2.96821		MAX_5-P-2.nd2:0002-0469-0512	515.288	519.225	15	4.74924	3.23576			MAX_7-P-2.nd2:0002-0512-0558	472.193	688.635	12	31.496	3.81001	3.72849				MAX_1-S1-1.nd2:0002-0512-0530	572.794		17	30.735	5.53115			MAX_12-F-1.nd2:0002-0512-0492	227.622	202.12	2							MAX_14-P-1.nd2:0002-0494-0512	406.438	370.756	11	30.993	3.54919
MAX_12-P-2.nd2:0002-0518-0532	635.47	578.321	11	32.031	3.43417			MAX_3-T-2.nd2:0002-0512-0418	595.299		6	0.94227				MAX_6-S-2.nd2:0002-0547-0512	779.234		8	32.288	2.4777					MAX_1-S-1.nd2:0002-0512-0557	706.65		25	38.723	6.45611			MAX_11-T-1.nd2:0002-0512-0527	504.832		13	4.08112						MAX_13-T-1.nd2:0002-0460-0512	366.831		6	33.4	1.79641
MAX_11-T-2.nd2:0002-0400-0512	528.136		20	62.06	3.22269			MAX_3-PSnd2-2.nd2:0002-0512-0322	441.896		8	2.5054				MAX_6-P-2.nd2:0002-0512-0526	578.824	679.029	13	31.619	4.11145	3.29458				MAX_1-P2-1.nd2:0002-0499-0512	319.412		14	30.963	4.52153			MAX_11-S-1.nd2:0002-0512-0670	416.512		7	1.59923						MAX_13-S-1.nd2:0002-0512-0391	332.555		5	30.393	1.64512
MAX_11-S-2.nd2:0002-0512-0477	616.235		20	54.324	3.68161			MAX_3-P2-2.nd2:0002-0465-0512	362.601		13	3.99067				MAX_5-S-2.nd2:0002-0513-0512	384.781		4	32.053	1.24793					MAX_1-P1-1.nd2:0002-0512-0556	317.988		9	31.045	2.89902			MAX_11-P-1.nd2:0002-0512-0639	461.279		9	2.85596						MAX_13-P1-1.nd2:0002-0612-0512	440.36		9	31.208	2.88388
MAX_11-P-2.nd2:0002-0512-0442	599.038		21	31.187	6.73357	4.26801		MAX_3-P-2.nd2:0002-0531-0504	469.145	496.664	5	1.57535				MAX_5-P-2.nd2:0002-0512-0456	377.71	381.245	8	32.592	2.45459	1.85126				MAX_1-p-1.nd2:0002-0512-0529	668.58		43	30.922	13.906	6.13657		MAX_11-F1-1.nd2:0002-0485-0512	368.404		9	2.7598						MAX_13-F-1.nd2:0002-0348-0512	363.488	375.809	6	34.837	1.72231
MAX_11-F-2.nd2:0002-0537-0512	709.791	613.3	5	22.515	2.22074			MAX_3-P1-2.nd2:0002-0512-0547	614.38		10	2.528	2.30834			MAX_4-T-2.nd2:0002-0512-0505	443.633		7	59.767	1.17121					MAX_1-F-1.nd2:0002-0543-0512	419.994	479.146	19	31.312	6.06796			MAX_11-F-1.nd2:0002-0512-0467	294.261	409.058	1	0.315577	2.32234					MAX_12-T-1.nd2:0002-0533-0512	380.692		2	32.218	0.620771
MAX_10-T-2.nd2:0002-0512-0561	492.708		13	32.175	4.0404			MAX_2-P-2.nd2:0002-0516-0512	646.405		5	1.6456				MAX_4-S2-2.nd2:0002-0404-0512	444.863		6	30.372	1.9755					MAX_7-P-1.nd2:0002-0512-0519	391.79		10	31.143	3.21099			MAX_10-T-1.nd2:0002-0405-0512	227.337		4	0.833889						MAX_12-P-1.nd2:0002-0512-0522	355.611	368.151	2	30.728	0.650872
MAX_10-P-2.nd2:0002-0512-0470	413.64	453.174	9	31.98	2.81426			MAX_2-T-1.nd2:0002-0512-0456	674.014		8	2.48054				MAX_4-F-2.nd2:0002-0543-0512	505.126		5	31.835	1.5706					MAX_7-F1nd2-1.nd2:0002-0512-0536	309.859		5	32.462	1.54026			MAX_10-S-1.nd2:0002-0512-0690	411.982		9	2.88138						MAX_11-T-1.nd2:0002-0475-0512	362.551		4	31.635	1.26442
MAX_9-S-2.nd2:0002-0512-0463	483.789		7	32.206	2.17351	2.49388		MAX_2-F-1.nd2:0002-0512-0477	595.5		7	1.36144				MAX_4-P-2.nd2:0002-0512-0519	413.692		10	31.352	3.18959					MAX_7-S-1.nd2:0002-0512-0734	335.374		2	40.364	0.495491	2.82868		MAX_10-P-1.nd2:0002-0512-0805	389.941		9	2.06911						MAX_11-S-1.nd2:0002-0481-0512	310.312		5	31.546	1.58499
MAX_9-P-2.nd2:0002-0492-0512	320.643	402.216	12	49.68	2.41546			MAX_2-S-2.nd2:0002-0575-0512	647.36	635.532	14	4.49337	2.49524			MAX_4-S-2.nd2:0002-0512-0539	490.221	463.476	8	31.568	2.53421	1.97673				MAX_7-F-1.nd2:0002-0512-0496	1559.06	649.022	5	31.375	1.59363			MAX_10-F-1.nd2:0002-0503-0537	274.451	325.928	5	1.49584	1.82006					MAX_11-P-1.nd2:0002-0623-0512	551.39	408.084	25	33.076	7.55835
MAX_8-S-2.nd2:0002-0512-0707	558.069		7	49.826	1.40489	1.91017		MAX_1-p1-1.nd2:0002-0512-0411	362.802		13	4.03063														MAX_6-T-1.nd2:0002-0442-0512	338.243		9	30.948	2.9081			MAX_9-P1-1.nd2:0002-0512-0544	238.721		2	0.643998						MAX_10-T-1.nd2:0002-0512-0473	507.938		10	32.318	3.09425
MAX_8-P-2.nd2:0002-0512-0565	380.662	469.365	15	35.82	4.1876			MAX_1-p-2.nd2:0002-0557-0512	556.9		15	3.76591														MAX_6-S-2-1.nd2:0002-0525-0512	345.272		10	31.265	3.19846			MAX_9-P-1.nd2:0002-0639-0512	250.207	244.464	7	1.15498						MAX_10-S1-1.nd2:0002-0512-0554	323.523		6	31.566	1.90078
								MAX_1-S-1.nd2:0002-0635-0512	441.054																	MAX_6-P-1.nd2:0002-0474-0512	365.785		5	33.709	1.48328	2.29587		MAX_8-T-1.nd2:0002-0465-0512	238.498		4	1.21488						MAX_10-S-1.nd2:0002-0512-0480	400.772		7	32.794	2.13454
								MAX_1-S1-1.nd2:0002-0506-0287	537.061		9	2.83277														MAX_6-F-1.nd2:0002-0441-0512	366.493	353.948	7	54.963	1.27358			MAX_8-S-1.nd2:0002-0661-0512	296.596		11	1.44243						MAX_10-P-1.nd2:0002-0219-0512	471.967		17	31.398	5.41436
								MAX_1-T-1.nd2:0002-0512-0522	496.557	478.875	6	1.73772	3.09176													MAX_15-T-1.nd2:0002-0512-0639	257		7	31.327	2.23449			MAX_8-P-1.nd2:0002-0576-0512	249.46		4	1.18825						MAX_10-F-1.nd2:0002-0512-0505	415.376	423.915	5	33.821	1.47837
																										MAX_15-S-1.nd2:0002-0512-0464	337.376		8	48.491	1.64979			MAX_8-F-1.nd2:0002-0334-0477	260.566	261.28	8	2.2007	1.51157					MAX_8-T-1.nd2:0002-0493-0512	495.873		6	32.888	1.82437
																										MAX_15-P-1.nd2:0002-0512-0472	304.841		3	31.278	0.959141	1.52925		MAX_7-T-1.nd2:0002-0378-0512	245.817		12	3.89636						MAX_9-F-1.nd2:0002-0512-0499	334.821		3	48.444	0.619272
MAX_9-S-2.nd2:0001-0512-0453	497.225		17	31.388	5.41608			MAX_8-T-1.nd2:0001-0401-0512	545.746		15	36.19	4.14479			MAX_8-T-2.nd2:0001-0512-0502	454.102	v	6	33.298	1.80191					MAX_15-F-1.nd2:0002-0511-0615	214.083	278.325	4	31.261	1.27955			MAX_7-S-1.nd2:0002-0512-0456	482.59		19	5.90392						MAX_9-S-1.nd2:0002-0512-0726	252.026		3	42.031	0.713759
MAX_9-P-1.nd2:0001-0593-0513	682.6	589.913	15	30.645	4.89476	5.15542		MAX_8-T-1.nd2:0001-0437-0512	504.471		10	36.561	2.73515			MAX_8-S-2.nd2:0001-0512-0370	483.001		5	32.395	1.54345					MAX_14-T-1.nd2:0002-0430-0512	297.305		6	31.542	1.90223			MAX_7-P-1.nd2:0002-0661-0512	553.244	427.217	22	6.84569	5.54866					MAX_9-T-1.nd2:0002-0512-0543	168.854	312.894	16	31.052	5.15265
MAX_8-T-1.nd2:0001-0555-0512	693.038		24	64.5	3.72093			MAX_8-S-1.nd2:0001-0512-0531	428.978		9	31.815	2.82885			MAX_8-P-2.nd2:0001-0512-0529	459.511		5	31.981	1.56343					MAX_14-S-1.nd2:0002-0512-0527	262.043		14	41.171	3.40045	2.19408		MAX_6-T-1.nd2:0002-0512-0461	224.857		3	0.914244						MAX_8-P-1.nd2:0002-0512-0485	259.64		4	31.292	1.27828
MAX_8-S-1.nd2:0001-0458-0512	603.301		12	53.309	2.25103			MAX_8-P-1.nd2:0001-0512-0500	469.785	487.245	20	31.246	6.40082	4.0274		MAX_8-F-2.nd2:0001-0467-0512	355.238	437.963	6	31.02	1.93424	1.71076				MAX_14-P-1.nd2:0002-0658-0512	374.357	311.235	2	30.921	0.64681			MAX_6-S-1.nd2:0002-0512-0515	207.828		4	1.23889						MAX_8-F-1.nd2:0002-0566-0512	434.841	347.24	12	33.707	3.56009
MAX_8-P-1.nd2:0001-0512-0731	582.568		25	31.436	7.95267			MAX_1-S-1.nd2:0001-0520-0512	401.687		17	32.7	5.19878			MAX_7-T-2.nd2:0001-0523-0512	381.474		6	31.947	1.87811					MAX_13-T-1.nd2:0002-0501-0512	243.378		10	37.977	2.63317			MAX_6-P-1.nd2:0002-0512-0542	252.57	228.418	5	1.57674	1.24329					MAX_7-S-1.nd2:0002-0512-0618	523.884		14	32.904	4.2548
MAX_8-F-1.nd2:0001-0384-0512	615.057	623.491	23	31.319	7.34378	5.3171		MAX_1-p-1.nd2:0001-0535-0512	274.229	337.958	5	31.332	1.59581			MAX_7-S-2.nd2:0001-0386-0512	440.236		13	32.99	3.94059					MAX_13-S-1.nd2:0002-0512-0528	328.99		3	32.309	0.928534	1.40284		MAX_5-S-1.nd2:0002-0511-0512	345.983		4	1.28156						MAX_7-P-1.nd2:0002-0512-0558	285.795	404.84	9	31.496	2.85751
MAX_7-T-1.nd2:0001-0595-0512	456.93		9	58.022	1.55114			MAX_4-ST-1.nd2:0001-0664-0512	602.058		25	32.673	7.65158			MAX_7-P-2.nd2:0001-0557-0512	412.388	411.366	8	29.347	2.726	2.84823				MAX_13-P-1.nd2:0002-0512-0517	217.686	263.351	6	54.767	1.09555			MAX_5-P1-1.nd2:0002-0512-0488	422.035		12	3.25839						MAX_6-S-1.nd2:0002-0547-0512	336.215		3	32.288	0.929138
MAX_7-F-1.nd2:0001-0512-0608	390.369		4	45.18	0.885347			MAX_4-F-1.nd2:0001-0485-0512	426.205		3	30.436	0.985675	3.85796		MAX_6-T-2.nd2:0001-0559-0512	368.559		5	30.792	1.6238					MAX_12-T-1.nd2:0002-0512-0488	301.93		2	35.414	0.564748			MAX_5-P-1.nd2:0002-0469-0512	319.671	362.563	4	1.26646	1.93547					MAX_6-P-1.nd2:0002-0512-0526	327.524	331.87	5	31.619	1.58133
MAX_7-T-1.nd2:0001-0693-0512	661.111		6	30.792	1.94856			MAX_4-P-1.nd2:0001-0477-0512	489.18		5	30.392	1.64517			MAX_6-S-2.nd2:0001-0398-0512	439.815		9	33.401	2.69453					MAX_12-S-1.nd2:0002-0512-0735	273.868		11	30.855	3.56506	1.74179		MAX_3-T-1.nd2:0002-0512-0418	312.786		12	1.88454						MAX_5-S-1.nd2:0002-0513-0512	353.008		6	32.053	1.8719
MAX_7-S-1.nd2:0001-0512-0743	603.897		14	30.965	4.52123			MAX_4-S-1.nd2:0001-0519-0512	378.112	473.889	2	38.094	0.525017	1.08509		MAX_6-P-3.nd2:0001-0476-0512	650.432		12	31.75	3.77953					MAX_12-P-1.nd2:0002-0518-0532	392.377	348.375	6	32.031	1.87319			MAX_3-PSnd2-1.nd2:0002-0512-0322	429.601		21	6.57668						MAX_5-P-1.nd2:0002-0512-0456	315.122	334.065	3	32.592	0.920471
MAX_7-P-1.nd2:0001-0512-0569	624.15	547.291	23	60.436	3.80568	2.54239		MAX_2-S-1.nd2:0001-0512-0430	479.038		12	64.327	1.86547			MAX_6-F-2.nd2:0001-0472-0512	463.46	480.567	3	30.687	0.977613	2.26887				MAX_11-T-1.nd2:0002-0400-0512	261.558		10	62.06	1.61134			MAX_3-P2-1.nd2:0002-0465-0512	433.413		14	4.29764						MAX_4-T-1.nd2:0002-0512-0505	371.419		7	59.767	1.17121
MAX_6-P-1.nd2:0001-0512-0625	618.176		29	49.012	5.91692			MAX_2-T-1.nd2:0001-0526-0512	540.911		5	31.125	1.60643			MAX_5-T-2.nd2:0001-0551-0512	366.445		3	30.952	0.969243					MAX_11-S-1.nd2:0002-0512-0477	351.962		13	54.324	2.39305			MAX_3-P-1.nd2:0002-0531-0504	314.057		2	0.63014						MAX_4-S2-1.nd2:0002-0404-0512	317.651		5	30.372	1.64625
MAX_6-S-1.nd2:0001-0512-0565	626.335		18	31.511	5.71229			MAX_2-P-1.nd2:0001-0512-0508	392.966		5	30.843	1.62111			MAX_5-S-2.nd2:0001-0467-0512	465.103		6	30.122	1.9919					MAX_11-P-1.nd2:0002-0512-0442	408.732		9	31.187	2.88582	2.19085		MAX_3-P1-1.nd2:0002-0512-0547	360.164	370.004	5	1.264	2.9306					MAX_4-F-1.nd2:0543-0512	306.574		3	31.835	0.942359
MAX_6-T-1.nd2:0001-0598-0512	507.644	584.052	10	38.473	2.59923	4.74281		MAX_2-T-1.nd2:0001-0526-0512	444.668	464.396	4	30.134	1.3274	1.6051		MAX_5-P-2.nd2:0001-0428-0512	456.02	429.189	9	31.267	2.87843	1.94653				MAX_11-F-1.nd2:0002-0537-0512	408.418	357.668	4	22.515	1.77659			MAX_2-T-1.nd2:0002-0512-0456	353.28		5	1.55034						MAX_4-P-1.nd2:0002-0512-0519	397.594		7	31.352	2.23271
MAX_5-T-1.nd2:0001-0476-0512	429.341		7	31.048	2.25457			MAX_3-F-1.nd2:0001-0429-0512	402.453		5	39.762	1.25748			MAX_4-T-2.nd2:0001-0512-0488	481.498		8	31.199	2.56418					MAX_10-T-1.nd2:0002-0512-0561	288.331		10	32.175	3.108	2.4423		MAX_2-F-1.nd2:0002-0512-0461	295.687		5	0.97246						MAX_4-S-1.nd2:0002-0512-0539	383.531	355.354	7	31.568	2.21744
MAX_5-S-1.nd2:0001-0468-0512	433.799		22	29.999	7.33358			MAX_3-T-2.nd2:0001-0512-0512	352.221		6	25.876	2.31875			MAX_4-S-2.nd2:0001-0512-0503	628.259		15	31.589	4.74849					MAX_10-P-1.nd2:0002-0512-0470	383.291	383.291	4	31.98	1.25078			MAX_2-P-1.nd2:0002-0516-0512	441.126		4	1.31648
MAX_5-P1-1.nd2:0001-0512-0436	415.24		17	34.836	4.88001			MAX_3-S-2.nd2:0001-0512-0546	515.417		14	31.199	4.48732			MAX_4-P-2.nd2:0001-0512-0459	417.592		14	30.697	4.56071					MAX_9-S-1.nd2:0002-0512-0463	259.881		10	32.206	3.10501	2.1779		MAX_2-S-1.nd2:0002-0575-0512	366.328	364.105	2	0.64191	1.1203
MAX_5-P-1.nd2:0001-0500-0512	536.873	453.813	21	30.818	6.8142	5.32059		MAX_3-P1-2.nd2:0001-0512-0493	417.876		5	32.835	1.52277			MAX_4-F-2.nd2:0001-0512-0462	392.006	479.839	9	31.142	2.88999	3.69084				MAX_9-P-1.nd2:0002-0492-0512	297.124	278.502	5	49.68	1.00644			MAX_1-p1-1.nd2:0002-0512-0439	436.125		13	4.03063
MAX_4-T-1.nd2:0001-0512-0433	566.641		18	34.307	5.24674			MAX_3-P-2.nd2:0001-0511-0512	470.01	431.595	18	30.85	5.83468	3.0842		MAX_3-T-2.nd2:0001-0512-0512	424.453		9	31.593	2.84873					MAX_8-S-1.nd2:0002-0512-0707	299.697		4	49.826	0.802794	0.904617		MAX_1-p-1.nd2:0002-0557-0512	456.717		13	3.26379
MAX_4-S-2-1.nd2:0001-0512-0443	586.758		14	32.764	4.27298			MAX_7-S-2.nd2:0001-0512-0543	431.325		9	31.009	2.90238			MAX_3-S-2.nd2:0001-0524-0512	445.532		5	30.971	1.61441					MAX_8-P-1.nd2:0002-0512-0565	282.556	291.126	5					MAX_1-S-1.nd2:0623-0512	437.635		10	3.14752
MAX_4-P-1.nd2:0001-0512-0515	582.971	578.79	21	33.122	6.3402	5.28664		MAX_7-T-2-2.nd2:0001-0512-0435	563.609	497.467	7	32.991	2.12179			MAX_3-P-2.nd2:0001-0512-0516	469.472		6	32.327	1.85603													MAX_1-T-1.nd2:0002-0512-0527	410.164	435.16	11	3.18582	3.40694
MAX_3-T-1.nd2:0001-0512-0463	533.306		5	32.327	1.54669			MAX_5-S-2.nd2:0001-0473-0512	426.981		4	35.32	1.1325	2.05223		MAX_3-F-2.nd2:0001-0512-0585	424.052	440.877	5	31.209	1.6021	1.98032
MAX_3-S-1.nd2:0001-0512-0481	584.145		14	31.973	4.37869			MAX_5-T-2.nd2:0001-0573-0670	469.106	448.043	15	30.776	4.87393			MAX_2-T-2.nd2:0001-0512-0472	429.843		11	31.961	3.44169
MAX_3-P-1.nd2:0001-0512-0535	642.095	586.515	23	30.159	7.62625	4.51721		MAX_6-P-2.nd2:0001-0512-0593	583.772		14	32.575	4.29777			MAX_2-S-2.nd2:0001-0516-0512	455.382		9	30.858	2.91659
MAX_2-S-1.nd2:0001-0599-0512	424.76		5	38.813	1.28823			MAX_6-S-2.nd2:0001-0534-0512	460.383		10	44.913	2.22653	3.79941		MAX_2-P-2.nd2:0001-0569-0512	402.221		12	30.675	3.91198
MAX_2-P-1.nd2:0001-0683-0512	519.159	471.959	20	85.699	2.33375	1.81099		MAX_6-T-2.nd2:0001-0526-0512	285.214	443.123	6	32.353	1.85454			MAX_2-F-2.nd2:0001-0512-0503	360.641	412.022	5	31.471	1.58876	2.96476
MAX_1-T-1.nd2:0001-0512-0387	525.911		16	63.991	2.50035			MAX_5-P-2.nd2:0001-0646-0512	633.408		9	31.862	2.82468			MAX_1-T-2.nd2:0001-0512-0475	521.848		7	37.647	1.85938
MAX_1-S-1.nd2:0001-0512-0496	545.66		4	31.43	1.27267			MAX_7-P-2.nd2:0001-0582-0512	554.689	594.048	4	40.29	0.992802	1.89068		MAX_1-P-2.nd2:0001-0512-0486	551.769		14	37.027	3.78102
MAX_1-P-1.nd2:0001-0512-0407	547.006	539.526	13	37.788	3.44025	2.40442										MAX_1-S-2.nd2:0001-0512-0496	484.151	519.256	4	32.356	1.23625	2.29222
normalize
mean intensity																	number
GPN_Ctrl	GPN_LatA	GPN_Noco	GPN	GPN_Ctrl	GPN_LatA	GPN_Noco	sγ2_Ctrl	sγ2_LatA	sγ2_Noco	Average	sγ2_Ctrl	sγ2_LatA	sγ2_Noco				GPN_Ctrl	GPN_LatA	GPN_Noco	Average	GPN_Ctrl	GPN_LatA	GPN_Noco	sγ2_Ctrl	sγ2_LatA	sγ2_Noco	Average	sγ2_Ctrl	sγ2_LatA	sγ2_Noco
898.722	612.783	496.581	720.696	1.24702	0.850266	0.68903	521.24	594.207	493.016	487.609	1.06897	1.21861	1.01109				8.88196	4.39663	4.24085	6.91852	1.28379	0.635486	0.61297	9.42114	5.13151	4.3977	5.39434	1.74649	0.951275	0.815243
819.109	561.929	460.939	720.696	1.13655	0.779704	0.639574	447.862	545.897	483.18	487.609	0.918487	1.11954	0.990918				8.32739	4.39464	2.85942	6.91852	1.20364	0.635199	0.4133	8.29189	4.60695	4.24487	5.39434	1.53715	0.854034	0.786912
799.141	486.733	369.266	720.696	1.10885	0.675365	0.512374	440.311	466.743	476.773	487.609	0.903001	0.957207	0.977779				8.26154	3.95361	2.31733	6.91852	1.19412	0.571453	0.334946	6.29504	4.55136	3.79588	5.39434	1.16697	0.843729	0.703678
780.147	438.412	323.358	720.696	1.08249	0.608318	0.448675	587.231	460.04	467.212	487.609	1.20431	0.943462	0.95817				8.12103	2.71407	2.23408	6.91852	1.17381	0.39229	0.322913	5.98819	3.39631	3.70664	5.39434	1.11009	0.629606	0.687134
746.962	433.124	319.654	720.696	1.03645	0.60098	0.443534	565.907	456.679	434.382	487.609	1.16058	0.936569	0.890842				7.60368	2.7073	2.07654	6.91852	1.09903	0.391312	0.300142	5.91616	3.3187	3.59609	5.39434	1.09673	0.615218	0.666641
712.807	432.684	291.837	720.696	0.989054	0.60037	0.404938	573.311	444.708	409.797	487.609	1.17576	0.912018	0.840423				6.67107	2.65252	1.7306	6.91852	0.964233	0.383393	0.25014	5.71487	2.91987	3.42962	5.39434	1.05942	0.541283	0.63578
696.414	417.353	289.529	720.696	0.966308	0.579098	0.401735	566.762	443.48	387.897	487.609	1.16233	0.909499	0.79551				6.23306	2.58894	1.18034	6.91852	0.900924	0.374204	0.170606	5.0652	2.81745	3.03853	5.39434	0.938983	0.522297	0.56328
662.791	392.262	286.38	720.696	0.919654	0.544282	0.397366	428.346	437.777	375.865	487.609	0.878462	0.897804	0.770834				6.19442	2.09712	1.16554	6.91852	0.895339	0.303116	0.168466	3.3408	2.60165	2.44702	5.39434	0.619316	0.482292	0.453627
615.628	390.495	232.328	720.696	0.854213	0.54183	0.322366	511.8	346.374	372.713	487.609	1.04961	0.710352	0.76437				4.8004	1.94462	0.942435	6.91852	0.693848	0.281074	0.136219	3.11748	2.10948	2.06892	5.39434	0.577916	0.391054	0.383535
475.239		228.822	720.696	0.659417		0.317501	389.688		338.287	487.609	0.799181		0.693768				4.09068		0.845673	6.91852	0.591264		0.122233	3.09351		1.95738	5.39434	0.573472		0.362859
720.696			720.696	1			331.236			487.609	0.679306						6.91852			6.91852	1			3.09351			5.39434	0.573472
							487.609			487.609	1													5.39434			5.39434	1
829.249	635.532	688.635	531.05	1.56153	1.19675	1.29674	649.021	435.16	477.956	364.684	1.77968	1.19325	1.3106				8.17206	7.08397	4.00801	4.19637	1.94741	1.68812	0.955114	2.76418	5.54866	3.55615	2.50421	1.10381	2.21573	1.42007
613.3	604.605	679.029	531.05	1.15488	1.13851	1.27865	479.146	427.217	423.915	364.684	1.31387	1.17147	1.16242				7.36492	4.68396	3.72849	4.19637	1.75507	1.11619	0.888503	1.11412	3.47027	3.46925	2.50421	0.444896	1.38577	1.38537
612.986	567.087	601.926	531.05	1.15429	1.06786	1.13346	469.971	409.058	408.084	364.684	1.28871	1.12168	1.11901				6.02231	3.66907	3.29458	4.19637	1.43512	0.874344	0.785101	4.15773	3.40694	3.33034	2.50421	1.66029	1.36048	1.32989
588.857	541.625	588.263	531.05	1.10885	1.01991	1.10774	430.149	370.004	404.839	364.684	1.17951	1.01459	1.11011				5.46599	3.58629	2.6995	4.19637	1.30255	0.854617	0.643293	3.68246	2.9306	2.9446	2.50421	1.47051	1.17027	1.17586
579.053	533.809	537.041	531.05	1.09039	1.0052	1.01128	383.291	364.105	387.583	364.684	1.05102	0.998413	1.06279				4.64669	3.23576	2.69605	4.19637	1.10731	0.771086	0.642473	6.13657	2.32234	2.88309	2.50421	2.4505	0.927373	1.15129
578.321	519.225	534.119	531.05	1.08902	0.977734	1.00578	357.668	362.563	383.807	364.684	0.98076	0.994184	1.05244				4.40793	3.09176	2.58625	4.19637	1.05042	0.73677	0.616307	2.82868	1.98833	2.80446	2.50421	1.12957	0.793994	1.1199
576.644	496.664	477.041	531.05	1.08586	0.93525	0.898299	353.948	362.544	375.808	364.684	0.970561	0.994131	1.0305				4.26801	3.02169	2.54573	4.19637	1.01707	0.720072	0.60665	2.29587	1.93547	2.01193	2.50421	0.916802	0.772886	0.803416
544.996	492.822	463.476	531.05	1.02626	0.928014	0.872754	348.375	332.227	370.756	364.684	0.955277	0.910999	1.01665				3.07087	2.90582	2.52989	4.19637	0.731793	0.692461	0.602877	1.52925	1.82006	1.96747	2.50421	0.610672	0.726797	0.785665
480.852	478.875	453.552	531.05	0.905475	0.901751	0.854067	330.338	325.928	368.151	364.684	0.905819	0.893726	1.00951				2.96821	2.53347	2.31814	4.19637	0.707328	0.603729	0.552416	2.19408	1.57037	1.8922	2.50421	0.876153	0.627092	0.755608
469.365	472.36	424.944	531.05	0.883845	0.889483	0.800196	311.235	302.313	355.354	364.684	0.853437	0.828972	0.974415				2.91196	2.49524	2.08523	4.19637	0.693923	0.594619	0.496913	1.40284	1.51157	1.64199	2.50421	0.560191	0.603609	0.655693
453.174	445.906	381.245	531.05	0.853355	0.83967	0.717909	291.127	261.28	347.24	364.684	0.798298	0.716456	0.952168				2.82683	2.41174	1.99753	4.19637	0.673637	0.574719	0.476015	1.74179	1.24329	1.39619	2.50421	0.695542	0.496479	0.557534
446.128	428.667	360.681	531.05	0.840088	0.807206	0.679185	278.502	244.464	334.065	364.684	0.763681	0.670344	0.916039				2.49388	2.30834	1.97673	4.19637	0.594295	0.550079	0.471056	2.19085	1.1203	1.25523	2.50421	0.874865	0.447365	0.501248
434.189	333.354	347.717	531.05	0.817605	0.627728	0.654773	278.325	237.35	331.87	364.684	0.763195	0.650837	0.910019				2.21933	1.63688	1.9528	4.19637	0.528869	0.390071	0.465356	2.4423	1.08942	1.05247	2.50421	0.975275	0.435036	0.420279
402.216	327.069	288.587	531.05	0.757398	0.615892	0.543428	263.351	228.418	312.894	364.684	0.722135	0.626346	0.857985				1.91017		1.85126	4.19637	0.455197		0.441158	2.1779	0.288692	0.635822	2.50421	0.869693	0.115283	0.253901
356.416	309.917		531.05	0.671153	0.583593		245.815	202.119		364.684	0.67405	0.554232					4.19637			4.19637	1			0.904617			2.50421	0.361238
531.05			531.05	1			364.684			364.684	1													2.50421
				1.0671	1.07458	0.939291	454.157	521.499	442.656	453.246	1.00201	1.15059	0.976635								1.32173	1.42458	1.50792	3.04031	7.77364	5.27897	4.70672	0.645951	1.6516	1.12158
				1.0565	0.881386	0.867989	378.419	441.357	316.534	453.246	0.834909	0.973769	0.698371								1.00473	0.987455	1.25595	3.11814	2.32706	2.78279	4.70672	0.662487	0.494413	0.591237
				0.990005	0.840054	0.792239	419.07	434.168	325.069	453.246	0.924598	0.957907	0.717203								0.950372	0.733043	0.855	4.628	2.65924	1.87013	4.70672	0.983275	0.564987	0.397332
				0.853736	0.801573	0.776368	490.407	531.23	374.886	453.246	1.08199	1.17206	0.827113								0.816412	0.69527	0.742452	9.48776	4.85244	2.01886	4.70672	2.01579	1.03096	0.428931
				1.52359	0.611338	0.744127	658.256	721.025	456.107	453.246	1.45232	1.5908	1.00631								0.738244	0.294593	0.56955	6.93021	7.45385	3.48949	4.70672	1.47241	1.58366	0.741385
				1.16449	0.900597	1.2451	455.623	459.873	334.154	453.246	1.00524	1.01462	0.737245								1.29079	0.977062	0.359165	2.62245	3.46188	2.25034	4.70672	0.557172	0.735518	0.478113
				0.955064	0.791628	1.07555	316.791	384.916	379.665	453.246	0.698937	0.849242	0.837657								1.28256	0.92175	0.328627	3.12018	2.03675	2.86903	4.70672	0.662919	0.432732	0.609559
				0.931565	0.761583	0.924487	453.246			453.246	1										1.15062	0.497877	0.895411	4.70672
																					0.616793	0.389403	0.690991
[truncated: 1 more columns]

## Sheet: Fig 6H_Raw data and normalize 
Source data
Ctrl_GPN								LatA_GPN									Noco_GPN								Ctrl_γ2									LatA_γ2									Noco_γ2
Source	mean intensity	mean intensity of per neuron	number	length	puncta number per 10 μm	puncta number per neuron		Source	mean intensity	mean intensity of per neuron	number	length	puncta number per 10 μm	puncta number per neuron			Source	mean intensity	mean intensity of per neuron	number	length	puncta number per 10 μm	puncta number per neuron		Source	mean intensity	mean intensity of per neuron	number	length	puncta number per 10 μm	puncta number per neuron			Source	mean intensity	mean intensity of per neuron	number	length	puncta number per 10 μm	puncta number per neuron			Source	mean intensity	mean intensity of per neuron	number	length	puncta number per 10 μm	puncta number per neuron
MAX_2022.10.18-CTRL-1-P-1.nd2:0001-0512-0535	713.046		41	64.479	6.35866			MAX_2022.10.18-latA-1-P-1.nd2:0001-0471-0512	574.986		25	45.304	5.51828				MAX_2022.10.18-Noco-1-F-1.nd2:0001-0391-0507	523.266		4	31.381	1.27466			MAX_2022.10.18-CTRL-1-P1-1.nd2:0001-0708-0512	312.51		47	64.479	7.28919				MAX_2022.10.18-latA-1-P-2.nd2	630.285		15	45.304	3.31097				MAX_2022.10.18-Noco-1-F-1.nd2:0001-0391-0507	415.411		12	31.381	3.82397
MAX_2022.10.18-CTRL-1-P1-1.nd2:0001-0708-0512	574.383		15	43.024	3.48643			MAX_2022.10.18-latA-1-S-1.nd2:0001-0491-0512	511.673		10	33.093	3.02179				MAX_2022.10.18-Noco-1-P1-1.nd2:0001-0420-0512	572.377		13	30.948	4.20059			MAX_2022.10.18-CTRL-1-S-1.nd2:0001-0512-0565	492.414		12	43.024	2.78914				MAX_2022.10.18-latA-1-S-1.nd2:0001-0491-0512	527.655		23	33.093	6.95011				MAX_2022.10.18-Noco-1-P-1.nd2:0001-0512-0464	347.728		19	30.948	6.13933
MAX_2022.10.18-CTRL-1-S-1.nd2:0001-0512-0565	697.497		33	57.932	5.69633			MAX_2022.10.18-latA-1-S1-1.nd2:0001-0454-0512	551.233	545.964	12	46.571	2.57671	3.70559			MAX_2022.10.18-Noco-1-S-1.nd2:0001-0512-0458	502.938		15	31.777	4.7204			MAX_2022.10.18-CTRL-1-T-1.nd2:0001-0480-0511	363.322	420.231	29	57.932	5.00587				MAX_2022.10.18-latA-1-S1-2.nd2:0001-0454-0512	734.075	630.865	34	46.571	7.30068	5.85392			MAX_2022.10.18-Noco-1-P1-1.nd2:0001-0420-0512	562.654		19	31.777	5.97917
MAX_2022.10.18-CTRL-1-T-1.nd2:0001-0480-0511	614.889	649.954	11	31.837	3.4551	4.74913		MAX_2022.10.18-latA-2-P-1.nd2:0001-0512-0541	565.394		39	31.339	12.4446				MAX_2022.10.18-Noco-1-T-1.nd2:0001-0512-0482-1	565.032	540.903	9	31.363	2.86962			MAX_2022.10.18-CTRL-2-p-1.nd2:0001-0407-0512	583.822		9	31.837	2.8269	4.47778			MAX_2022.10.18-latA-2-P-1.nd2	381.453		36	31.339	11.4873				MAX_2022.10.18-Noco-1-S-1.nd2:0001-0512-0458	250.822		13	31.363	4.14501
MAX_2022.10.18-CTRL-2-p-1.nd2:0001-0407-0512	577.023		22	31.618	6.95806			MAX_2022.10.18-latA-3-P-1.nd2:0001-0512-0444	414.778		7	30.483	2.29636				MAX_2022.10.18-Noco-2-P-1.nd2:0001-0512-0407	544.359		16	31.667	5.05258	3.62357		MAX_2022.10.18-CTRL-2-P1-1.nd2:0001-0512-0535-1	779.792		29	31.618	9.17199				MAX_2022.10.18-latA-3-P-2.nd2:0001-0512-0444	513.552		18	30.483	5.90493				MAX_2022.10.18-Noco-1-T-1.nd2:0001-0512-0482-1	293.307	373.984	19	31.667	5.99994	5.21748
MAX_2022.10.18-CTRL-2-P1-1.nd2:0001-0512-0535-1	639.81		26	52.291	4.97217			MAX_2022.10.18-latA-3-S-1.nd2:0001-0512-0568	440.125	473.432	5	39.492	1.26608	5.33567			MAX_2022.10.18-Noco-2-S-1.nd2:0001-0512-0384	691.335		16	38.989	4.10372			MAX_2022.10.18-CTRL-2-P1-1.nd2:0001-0512-0535-1	779.792		33	52.291	6.31084				MAX_2022.10.18-latA-3-S-1.nd2:0001-0512-0568	249.354	381.453	8	39.492	2.02573	6.47265			MAX_2022.10.18-Noco-2-P-1.nd2:0001-0512-0407	184.924		6	38.989	1.5389
MAX_2022.10.18-CTRL-2-S-1.nd2:0001-0406-0512	697.728	638.187	57	78.81	7.23258	6.38761		MAX_2022.10.18-latA-4-P-1.nd2:0001-0512-0538	542.043		10	31.84	3.1407				MAX_2022.10.18-Noco-2-T-1.nd2:0001-0488-0510	690.887	642.194	27	36.288	7.44048			MAX_2022.10.18-CTRL-2-S-1.nd2:0001-0406-0512	503.031	661.609	31	78.81	3.93351	6.47211			MAX_2022.10.18-latA-4-P-1.nd2:0001-0512-0538	437.758		7	31.84	2.19849				MAX_2022.10.18-Noco-2-S-1.nd2:0001-0512-0384	169.427		6	36.288	1.65344
MAX_2022.10.18-CTRL-3-P-1.nd2:0001-0512-0502	638.644		11	32.116	3.42508			MAX_2022.10.18-latA-4-S-1.nd2:0001-0512-0537	519.353		7	31.432	2.22703				MAX_2022.10.18-Noco-3-F-1.nd2:0001-0512-0424	561.006		15	31.902	4.7019	5.41537		MAX_2022.10.18-CTRL-3-P-1.nd2:0001-0512-0502	465.1		25	32.116	7.78428				MAX_2022.10.18-latA-4-S-1.nd2:0001-0512-0537	465.999		15	31.432	4.77221				MAX_2022.10.18-Noco-2-T-1.nd2:0001-0488-0510	288.794	214.382	3	31.902	0.94038	1.37757
MAX_2022.10.18-CTRL-3-T-1.nd2:0001-0503-0512	690.853	664.749	25	31.585	7.91515	5.67012		MAX_2022.10.18-latA-4-T-1.nd2:0001-0512-0456	490.581		8	31.674	2.52573				MAX_2022.10.18-Noco-3-S-1.nd2:0001-0497-0512	600.72		10	31.633	3.16126			MAX_2022.10.18-CTRL-3-T-1.nd2:0001-0503-0512	441.113	453.106	19	31.585	6.01551	6.8999			MAX_2022.10.18-latA-4-T-1.nd2:0001-0512-0456	365.806		12	31.674	3.7886				MAX_2022.10.18-Noco-3-F-1.nd2:0001-0512-0424	360.571		7	31.633	2.21288
MAX_2022.10.18-CTRL-4-P-1.nd2:0001-0508-0512	800.496		54	31.473	17.1576			MAX_2022.10.18-latA-4-F-1.nd2:0001-0512-0628	459.668	502.911	3	31.427	0.954593	2.21201			MAX_2022.10.18-Noco-3-S1-1.nd2:0001-0512-0626	521.756	561.161	27	31.335	8.61656	5.88891		MAX_2022.10.18-CTRL-4-P-1.nd2:0001-0508-0512	810.705		47	31.473	14.9334				MAX_2022.10.18-latA-4-F-1.nd2:0001-0512-0628	275.64	386.301	7	31.427	2.22738	3.24667			MAX_2022.10.18-Noco-3-S-1.nd2:0001-0497-0512	446.46	403.515	13	31.335	4.14872	3.1808
MAX_2022.10.18-CTRL-4-S-1.nd2:0001-0526-0512	867.388		53	31.744	16.6961			MAX_2022.10.18-latA-5-P-1.nd2:0001-0512-0536	558.702		19	31.599	6.01285				MAX_2022.10.18-Noco-11-S-1.nd2:0001-0512-0297	517.383		12	31.741	3.7806			MAX_2022.10.18-CTRL-4-S-1.nd2:0001-0526-0512	558.274		56	31.744	17.6411				MAX_2022.10.18-latA-5-P-1.nd2	453.923		26	31.599	8.22811				MAX_2022.10.18-Noco-11-S-1.nd2:0001-0512-0297	439.431		9	31.741	2.83545
MAX_2022.10.18-CTRL-4-T-1.nd2:0001-0454-0512	979.739	882.541	21	35.758	5.87281	13.2421		MAX_2022.10.18-latA-5-P1-1.nd2:0001-0500-0512	563.299		15	31.6	4.74684				MAX_2022.10.18-Noco-11-P-1.nd2:0001-0512-0638	491.811	483.305	12	32.164	3.73088	3.75574		MAX_2022.10.18-CTRL-4-T-1.nd2:0001-0454-0512	539.4	636.126	23	35.758	6.43213	13.0022			MAX_2022.10.18-latA-5-P1-1.nd2:0001-0500-0512	551.478		22	31.6	6.96203				MAX_2022.10.18-Noco-11-P-1.nd2:0001-0512-0638	857.459		15	32.164	4.6636	3.74952
MAX_2022.10.18-CTRL-5-P-1.nd2:0001-0512-0462	588.119		18	32.317	5.56982			MAX_2022.10.18-latA-5-S-1.nd2:0001-0512-0419	575.506		13	32.127	4.04644				MAX_2022.10.18-Noco-10-S-1.nd2:0001-0493-0512	474.8		8	31.469	2.54218			MAX_2022.10.18-CTRL-5-P-1.nd2:0001-0512-0462	409.209		21	32.317	6.49813				MAX_2022.10.18-latA-5-S-1.nd2:0001-0512-0419	349.221		10	32.127	3.11265				MAX_2022.10.18-Noco-10-S-1.nd2:0001-0493-0512	230.256		5	31.469	1.58887
MAX_2022.10.18-CTRL-5-S-1.nd2:0001-0512-0447	562.799		8	31.779	2.51739			MAX_2022.10.18-latA-5-T-1.nd2:0001-0535-0512	483.719		6						MAX_2022.10.18-Noco-10-P-1.nd2:0001-0418-0512	597.047	535.923	14	33.741	4.14925	3.34572		MAX_2022.10.18-CTRL-5-S-1.nd2:0001-0512-0447	269.186		7	31.779	2.20271				MAX_2022.10.18-latA-5-T-1.nd2:0001-0535-0512	306.741		6						MAX_2022.10.18-Noco-10-P-1.nd2:0001-0418-0512	249.292	445.669	11	33.741	3.26013	2.4245
MAX_2022.10.18-CTRL-5-T-1.nd2:0001-0513-0495	535.246	562.055	9	31.966	2.81549	3.63423		MAX_2022.10.18-latA-5-F-1.nd2:0001-0512-0548	483.987		9	32.139	2.80034				MAX_2022.10.18-Noco-9-T-1.nd2:0001-0512-0511	689.141		25	32.178	7.76928			MAX_2022.10.18-CTRL-5-T-1.nd2:0001-0513-0495	315.88	331.425	14	31.966	4.37965	4.36016			MAX_2022.10.18-latA-5-F-1.nd2:0001-0512-0548	393.398		12	32.139	3.73378				MAX_2022.10.18-Noco-9-T-3.nd2:0001-0512-0511	606.263		14	32.178	4.3508
MAX_2022.10.18-CTRL-6-P-1.nd2:0001-0495-0512	569.79		16	31.32	5.10856			MAX_2022.10.18-latA-5-T1-1.nd2:0001-0528-0642	590.76	542.662	22	49.269	4.46528	4.41435			MAX_2022.10.18-Noco-9-S-1.nd2:0001-0512-0541	613.31		23	31.93	7.20326			MAX_2022.10.18-CTRL-6-P-1.nd2:0001-0495-0512	483.157		10	31.32	3.19285				MAX_2022.10.18-latA-5-T1-1.nd2:0001-0528-0642	668.775	453.923	19	49.269	3.85638	5.17859			MAX_2022.10.18-Noco-9-S-2.nd2:0001-0512-0541	775.13		36	31.93	11.2747
MAX_2022.10.18-CTRL-6-S-1.nd2:0001-0512-0539	511.216	540.503	16	31.842	5.02481	5.06668		MAX_2022.10.18-latA-6-P-1.nd2:0001-0512-0499	497.361		11	32.067	3.43032				MAX_2022.10.18-Noco-9-P-1.nd2:0001-0512-0554	554.034		33	30.964	10.6575			MAX_2022.10.18-CTRL-6-S-2.nd2:0001-0512-0539	709.911	596.534	34	31.842	10.6777	6.93528			MAX_2022.10.18-latA-6-P-1.nd2:0001-0512-0499	272.852		3	32.067	0.935541				MAX_2022.10.18-Noco-9-P-1.nd2:0001-0512-0554	461.623		15	30.964	4.84434
MAX_2022.10.18-CTRL-7-P-1.nd2:0001-0512-0704	722.968		41	81.137	5.05318			MAX_2022.10.18-latA-6-P1-1.nd2:0001-0512-0701	553.302		19	44.162	4.30234				MAX_2022.10.18-Noco-9-F-1.nd2:0001-0512-0347	565.395		24	55.775	4.303			MAX_2022.10.18-CTRL-7-P-1.nd2:0001-0512-0704	472.15		57	81.137	7.02515				MAX_2022.10.18-latA-6-P1-1.nd2:0001-0512-0701	688.897		30	44.162	6.79317				MAX_2022.10.18-Noco-9-F-1.nd2:0001-0512-0347	288.784		11	55.775	1.97221
MAX_2022.10.18-CTRL-7-S-1.nd2:0001-0512-0727	650.932	686.95	14	31.506	4.4436	5.05318		MAX_2022.10.18-latA-6-S-1.nd2:0001-0515-0512	502.903		6	31.379	1.91211				MAX_2022.10.18-Noco-9-P-1.nd2:0001-0512-0550	552.199	594.816	29	32.362	8.96113	7.77884		MAX_2022.10.18-CTRL-7-S-1.nd2:0001-0512-0727	435.484	453.817	17	31.506	5.3958	6.21048			MAX_2022.10.18-latA-6-S-1.nd2:0001-0515-0512	469.557		10	31.379	3.18684				MAX_2022.10.18-Noco-9-P-1.nd2:0001-0512-0550	465.998	519.56	15	32.362	4.63507	5.41541
MAX_2022.10.18-CTRL-8-P-1.nd2:0001-0512-0490	460.624	460.624	13	5.81	22.3752			MAX_2022.10.18-latA-6-T-1.nd2:0001-0512-0464	558.567	528.033	14	35.89	3.90081	3.38639			MAX_2022.10.18-Noco-8-T-1.nd2:0001-0502-0512	624.736		20	31.549	6.33935			MAX_2022.10.18-CTRL-8-P-1.nd2:0001-0512-0490	415.296		23	5.81	39.5869				MAX_2022.10.18-latA-6-T-1.nd2:0001-0512-0464	363.794	477.102	21	35.89	5.85121	4.19169			MAX_2022.10.18-Noco-8-T-2.nd2:0001-0502-0512	419.739		11	31.549	3.48664
MAX_2022.10.18-CTRL-9-P-1.nd2:0001-0512-0645	581.811		19	50.595	3.75531			MAX_2022.10.18-latA-7-P-1.nd2:0001-0512-0502	585.021		37	31.073	11.9074				MAX_2022.10.18-Noco-8-P1-1.nd2:0001-0512-0648	673.554		26	31.618	8.22316			MAX_2022.10.18-CTRL-9-P-1.nd2:0001-0512-0645	390.046		13	50.595	2.56942				MAX_2022.10.18-latA-7-P-1.nd2	670.453		48	31.073	15.4475				MAX_2022.10.18-Noco-8-P1-1.nd2:0001-0512-0648	646.98		22	31.618	6.95806
MAX_2022.10.18-CTRL-9-S-1.nd2:0001-0512-0560	573.434		18	31.521	5.71048			MAX_2022.10.18-latA-7-S-1.nd2:0001-0512-0465	584.871	584.946	27	31.608	8.54214	10.2248			MAX_2022.10.18-Noco-8-P-1.nd2:0001-0512-0512	674.825	657.705	20	32.653	6.12501	6.89584		MAX_2022.10.18-CTRL-9-S-1.nd2:0001-0512-0560	379.781		18	31.521	5.71048				MAX_2022.10.18-latA-7-S-1.nd2	587.951	629.202	34	31.608	10.7568	13.1021			MAX_2022.10.18-Noco-8-P-3.nd2:0001-0512-0512	565.33	544.016	17	32.653	5.20626	5.21699
MAX_2022.10.18-CTRL-9-S1-1.nd2:0001-0535-0512	542.113		10	31.366	3.18817			MAX_2022.10.18-CTRL-8-S-1.nd2:0001-0562-0512	523.311		17	34.329	4.95208				MAX_2022.10.18-Noco-7-S1-1.nd2:0001-0430-0314	445.284		3	45.601	0.65788			MAX_2022.10.18-CTRL-9-S1-1.nd2:0001-0535-0512	495.343		29	31.366	9.24568				MAX_2022.10.18-CTRL-8-S-1.nd2:0001-0562-0512	277.245		27	34.329	7.86507				MAX_2022.10.18-Noco-7-S1-2.nd2:0001-0430-0314	378.699		16	45.601	3.50869
MAX_2022.10.18-CTRL-9-T-1.nd2:0001-0512-0411	531.009	557.092	17	50.055	3.39626	4.01256		MAX_2022.10.18-CTRL-8-T-1.nd2:0001-0462-0512	450.314	486.812	12	31.359	3.82665	4.38937			MAX_2022.10.18-Noco-7-S-1.nd2:0001-0420-0512	400.284		4	31.922	1.25305			MAX_2022.10.18-CTRL-9-T-1.nd2:0001-0512-0411	475.523	435.173	27	50.055	5.39407	5.72991			MAX_2022.10.18-CTRL-8-T-1.nd2:0001-0462-0512	592.906	435.075	23	31.359	7.33442	7.59974			MAX_2022.10.18-Noco-7-S-1.nd2:0001-0420-0512	266.337		4	31.922	1.25305
MAX_2022.10.18-CTRL-10-P-1.nd2:0001-0487-0512	502.224		20	31.744	6.3004			MAX_2022.10.18-latA-9-P-1.nd2:0001-0512-0388	581.507		20	42.7	4.68384				MAX_2022.10.18-Noco-7-P-1.nd2:0001-0554-0512	465.434	437.001	8	31.573	2.53381	1.48158		MAX_2022.10.18-CTRL-10-P-2.nd2:0001-0487-0512	1051.59		36	31.744	11.3407				MAX_2022.10.18-latA-9-P-1.nd2	518.114		42	42.7	9.83607				MAX_2022.10.18-Noco-7-P-1.nd2:0001-0554-0512	331.298	325.445	22	31.573	6.96798	3.90991
MAX_2022.10.18-CTRL-10-S-1.nd2:0001-0757-0512	403.176		7	66.289	1.05598			MAX_2022.10.18-latA-9-S-1.nd2:0001-0512-0344	538.631		7	31.619	2.21386				MAX_2022.10.18-Noco-6-S1-1.nd2:0001-0581-0512	539.335		13	32.271	4.02838			MAX_2022.10.18-CTRL-10-S-1.nd2:0001-0757-0512	237.58		37	66.289	5.58162				MAX_2022.10.18-latA-9-S-1.nd2:0001-0512-0344	570.589		9	31.619	2.84639				MAX_2022.10.18-Noco-6-S1-1.nd2:0001-0581-0512	378.79		13	32.271	4.02838
MAX_2022.10.18-CTRL-10-T-1.nd2:0001-0512-0526	426.79	444.063	5	32.069	1.55914	2.97184		MAX_2022.10.18-latA-9-T-1.nd2:0001-0512-0344	406.838		7	31.112	2.24994				MAX_2022.10.18-Noco-6-P-1.nd2:0001-0494-0512	531.517	535.426	50	76.361	6.54785	5.28811		MAX_2022.10.18-CTRL-10-T-1.nd2:0001-0512-0526	448.933	579.369	35	32.069	10.914	9.27877			MAX_2022.10.18-latA-9-T-1.nd2:0001-0512-0344	300.376		13	31.112	4.17845				MAX_2022.10.18-Noco-6-P-1.nd2:0001-0494-0512	680.86	529.825	34	76.361	4.45253	4.24046
MAX_2022.10.18-CTRL-11-F-1.nd2:0001-0580-0512	551.309		8	31.957	2.50336			MAX_2022.10.18-latA-9-F-1.nd2:0001-0628-0512	643.965	542.735	10	33.007	3.02966	3.04432			MAX_2022.10.18-Noco-5-T-1.nd2:0001-0512-0482	565.264		17	31.383	5.41695			MAX_2022.10.18-CTRL-11-F-1.nd2:0001-0580-0512	551.276		22	31.957	6.88425				MAX_2022.10.18-latA-9-F-1.nd2:0001-0628-0512	434.262	455.835	11	33.007	3.33263	5.04838			MAX_2022.10.18-Noco-5-T-1.nd2:0001-0512-0482	369.149		18	31.383	5.73559
MAX_2022.10.18-CTRL-11-F1-1.nd2:0001-0519-0512	511.113		11					MAX_2022.10.18-latA-10-P-1.nd2:0001-0531-0512	561.895		34	38.762	8.77148				MAX_2022.10.18-Noco-5-S-1.nd2:0001-0512-0465	587.037		16	32.432	4.9334			MAX_2022.10.18-CTRL-11-F1-1.nd2:0001-0519-0512	340.541		27						MAX_2022.10.18-latA-10-P-1.nd2	674.716		38	38.762	9.80342				MAX_2022.10.18-Noco-5-S-1.nd2:0001-0512-0465	412.383		17	32.432	5.24174
MAX_2022.10.18-CTRL-11-P-1.nd2:0001-0733-0512	543.245		25	31.746	7.87501			MAX_2022.10.18-latA-10-S-1.nd2:0001-0759-0512	529.327		10	38.445	2.60112				MAX_2022.10.18-Noco-5-P-1.nd2:0001-0512-0510	581.005		26	29.982	8.67187			MAX_2022.10.18-CTRL-11-P-1.nd2:0001-0733-0512	389.451		35	31.746	11.025				MAX_2022.10.18-latA-10-S-1.nd2:0001-0759-0512	589.92		9	38.445	2.34101				MAX_2022.10.18-Noco-5-P-1.nd2:0001-0512-0510	380.862		8	29.982	2.66827
MAX_2022.10.18-CTRL-11-S-1.nd2:0001-0512-0688	464.528		14	45.028	3.10918			MAX_2022.10.18-latA-10-P1-1.nd2:0001-0512-0474	694.379	595.2	21	32.074	6.54736	5.97332			MAX_2022.10.18-Noco-5-F-1.nd2:0001-0512-0459	488.569	555.469	9	31.935	2.81822	5.46011		MAX_2022.10.18-CTRL-11-S-1.nd2:0001-0512-0688	427.149		41	45.028	9.10545				MAX_2022.10.18-latA-10-P1-2.nd2:0001-0512-0474	750.512	671.716	18	32.074	5.61202	5.91881			MAX_2022.10.18-Noco-5-F-1.nd2:0001-0512-0459	312.703	368.774	23	31.935	7.20213	5.21193
MAX_2022.10.18-CTRL-11-T-1.nd2:0001-0422-0512	576.347		14	31.72	4.41362	4.47529		MAX_2022.10.18-latA-11-P-1.nd2:0001-0537-0512	524.499		15	31.258	4.79877				MAX_2022.10.18-Noco-4-T-1.nd2:0001-0453-0512	585.903		12	31.835	3.76944			MAX_2022.10.18-CTRL-11-T-1.nd2:0001-0422-0512	499.493	441.582	23	31.72	7.25095	8.56641			MAX_2022.10.18-latA-11-P-1.nd2	226.174		14	31.258	4.47885				MAX_2022.10.18-Noco-4-T-1.nd2:0001-0453-0512	400.098		8	31.835	2.51296
MAX_2022.10.18-CTRL-12-P-1.nd2:0001-0512-0664	552.795	529.308	27	49.222	5.48535			MAX_2022.10.18-latA-11-P1-1.nd2:0001-0512-0494	472.612		9	33.44	2.69139				MAX_2022.10.18-Noco-4-S1-1.nd2:0001-0457-0409	487.588		11	22.358	4.91994			MAX_2022.10.18-CTRL-12-P-1.nd2:0001-0512-0664	609.042		33	49.222	6.70432				MAX_2022.10.18-latA-11-P1-1.nd2:0001-0512-0494	199.96		7	33.44	2.0933				MAX_2022.10.18-Noco-4-S1-1.nd2:0001-0457-0409	205.665		15	22.358	6.70901
MAX_2022.10.18-CTRL-12-S-1.nd2:0001-0512-0789	510.508		12	31.371	3.82519			MAX_2022.10.18-latA-11-S-1.nd2:0001-0518-0512	469.529	488.88	7	31.451	2.22568	4.50153			MAX_2022.10.18-Noco-4-S-1.nd2:0001-0451-0512	516.959		20	33.935	5.89362			MAX_2022.10.18-CTRL-12-S-1.nd2:0001-0512-0789	310.6		22	31.371	7.01285				MAX_2022.10.18-latA-11-S-1.nd2:0001-0518-0512	213.388	213.174	5	31.451	1.58977	2.72064			MAX_2022.10.18-Noco-4-S-1.nd2:0001-0451-0512	563.17		17	33.935	5.00958
MAX_2022.10.18-CTRL-12-T-1.nd2:0001-0512-0521	566.489	543.264	15	31.542	4.75556	4.6887		MAX_2022.10.18-latA-12-P-1.nd2:0001-0512-0486	577.639		27	31.441	8.58751				MAX_2022.10.18-Noco-4-P-1.nd2:0001-0568-0512	463.731		19	59.469	3.19494			MAX_2022.10.18-CTRL-12-T-1.nd2:0001-0512-0521	295.061	404.901	6	31.542	1.90223	5.20646			MAX_2022.10.18-latA-12-P-1.nd2	334.88		22	31.441	6.99723				MAX_2022.10.18-Noco-4-P-1.nd2:0001-0568-0512	382.995		37	59.469	6.22173
								MAX_2022.10.18-latA-12-S-1.nd2:0001-0512-0467	537.305		9	31.375	2.86853				MAX_2022.10.18-Noco-4-F-1.nd2:0001-0512-0599	540.588	518.954	17	31.566	5.38554	4.6327											MAX_2022.10.18-latA-12-S-1.nd2:0001-0512-0467	367.654		12	31.375	3.8247				MAX_2022.10.18-Noco-4-F-1.nd2:0001-0512-0599	249.14	360.214	5	31.566	1.58398	4.40745
								MAX_2022.10.18-latA-12-T-1.nd2:0001-0512-0332	456.276	523.74	7	69.389	1.00881	4.15495																				MAX_2022.10.18-latA-12-T-1.nd2:0001-0512-0332	302.107	334.88	11	69.389	1.58527	4.13573
								MAX_2022.10.18-latA-13-P-1.nd2:0001-0469-0512	543.521		15	31.786	4.71906																					MAX_2022.10.18-latA-13-P-1.nd2:0001-0469-0512	679.083		23	31.786	7.23589
								MAX_2022.10.18-latA-13-P1-1.nd2:0001-0512-0514	514.818		7	31.387	2.23022																					MAX_2022.10.18-latA-13-P1-1.nd2:0001-0512-0514	466.298		13	31.387	4.14184
								MAX_2022.10.18-latA-13-S-1.nd2:0001-0512-0437	558.758		14	32.1	4.36137																					MAX_2022.10.18-latA-13-S-1.nd2:0001-0512-0437	574.785		10	32.1	3.11526
								MAX_2022.10.18-latA-13-T-1.nd2:0001-0512-0578	543.286		7	31.704	2.20792																					MAX_2022.10.18-latA-13-T-1.nd2:0001-0512-0578	311.546		4	31.704	1.26167
								MAX_2022.10.18-latA-13-F-1.nd2:0001-0512-0545	491.344	530.345	4	31.223	1.28111	2.95994																				MAX_2022.10.18-latA-13-F-1.nd2:0001-0512-0545	247.464	494.108	3	31.223	0.96083	3.3431
								MAX_2022.10.18-latA-14-P-1.nd2:0001-0512-0455	457.124		13	31.252	4.15973																					MAX_2022.10.18-latA-14-P-1.nd2:0001-0512-0455	754.855		31	31.252	9.91937
								MAX_2022.10.18-latA-14-S-1.nd2:0001-0512-0504	517.549		18	31.901	5.64246																					MAX_2022.10.18-latA-14-S-1.nd2:0001-0512-0504	418.463		13	31.901	4.07511
								MAX_2022.10.18-latA-15-P-1.nd2:0001-0434-0513	615.01	529.894	17	31.872	5.33384	5.04534																				MAX_2022.10.18-latA-15-P-1.nd2:0001-0434-0513	309.005		5	31.872	1.56878	5.18775
MAX_5-P-2.nd2:0002-0512-0605	545.78		30	33.035	9.08128			MAX_1-F-2.nd2:0002-0512-0555	507.483		25	31.479	7.9418				MAX_3-T-2.nd2:0002-0512-0637	285.302
MAX_5-F1-2.nd2:0002-0315-0512	556.58		24	42.149	5.69409			MAX_1-T-2.nd2:0002-0501-0512	516.115		16	30.718	5.20867				MAX_3-F-2.nd2:0002-0474-0512	392.18		12	30.959	3.87609			MAX_5-P-1.nd2:0002-0512-0605	416.104		10	33.035	3.02709				MAX_1-F-1.nd2:0002-0512-0555	550.26		5	31.479	1.58836				MAX_1-p-1.nd2:0002-0376-0512	614.944		MAX_1-p-1.nd2	9	30.959	2.90707
MAX_5-F-2.nd2:0002-0512-0609	529.332	543.897	20	31.704	6.30835	7.0279		MAX_1-P-2.nd2:0002-0488-0512	390.62		22	32.734	6.72084				MAX_3-F-2.nd2:0002-0604-0517	380.479		13	30.934	4.2025	4.03929		MAX_5-F1-1.nd2:0002-0315-0512	499.086		43	42.149	10.2019				MAX_1-T-1.nd2:0002-0501-0512	767.833		16	30.718	5.20867				MAX_1-p-1.nd2:0002-0388-0512	592.636	603.79	MAX_1-p-1.nd2	7	30.934	2.26288
MAX_4-T-2.nd2:0002-0593-0512	628.442		25	31.807	7.85991			MAX_1-S-2.nd2:0002-0512-0504	395.8	452.505	23	31.377	7.33021	6.80038			MAX_3-P-2.nd2:0002-0512-0595	311.877		8	31.225	2.56205			MAX_5-F-1.nd2:0002-0512-0609	518.146	477.779	10	31.704	3.15418	5.46106			MAX_1-P-1.nd2:0002-0488-0512	418.353		11	32.734	3.36042				MAX_2-S-1.nd2:0002-0469-0512	993.744		MAX_4-T-1.nd2	15	31.225	4.80384
MAX_4-S-2.nd2:0001-0653-0512	586.35		28	31.15	8.98876			MAX_2-T-2.nd2:0002-0512-0294	374.106		18	33.16	5.42823				MAX_3-T-2.nd2:0002-0512-0637	285.302	331.028	7	31.121	2.24929			MAX_4-T-1.nd2:0002-0593-0512	485.809		7	31.807	2.20077				MAX_1-S-1.nd2:0002-0512-0504	352.38	522.207	14	31.377	4.46187	3.65483			MAX_2-S-1.nd2:0002-0469-0512	1078.47		MAX_4-S-1.nd2	12	31.356	3.82702
MAX_4-P-2.nd2:0002-0512-0573	668.248	627.68	40	34.253	11.6778	9.50883		MAX_2-P-2.nd2:0002-0512-0500	491.977		18	31.379	5.73632				MAX_1-p-2.nd2:0002-0376-0512	380.957		6	31.634	1.89669			MAX_4-S-1.nd2:0001-0653-0512	425.59		9	31.15	2.88925				MAX_2-T-1.nd2:0002-0512-0294	468.106		19	33.16	5.72979				MAX_2-P-1.nd2:0002-0413-0512	411.105	827.774	MAX_4-F-1.nd2	6	31.121	1.92796
MAX_3-T1-2.nd2:0002-0512-0495	578.265		23	32.102	7.16466			MAX_2-F-2.nd2:0002-0512-0611	402.882	422.988	20	28.524	7.01164	6.05873			MAX_1-p-2.nd2:0002-0388-0512	372.481	376.719	16	32.638	4.90226	2.90257		MAX_4-P-1.nd2:0002-0512-0573	527.996	479.798	9	34.253	2.62751	2.57251			MAX_2-P-1.nd2:0002-0512-0500	675.356		15	31.379	4.78027				MAX_3-F-1.nd2:0002-0474-0512	589.192		MAX_4-S-1.nd2	13	32.638	3.98309
MAX_3-T-2.nd2:0002-0512-0541	695.08		73	32.49	22.4685			MAX_7-T-2.nd2:0002-0512-0396	304.42		9	31.449	2.86178				MAX_2-S-2.nd2:0002-0469-0512	831.525		41	32.688	12.5428			MAX_3-T1-1.nd2:0002-0512-0495	308.035		7	32.102	2.18055				MAX_2-F-1.nd2:0002-0512-0611	432.513	525.325	9	28.524	3.15524	4.5551			MAX_3-T-1.nd2:0002-0512-0637	499.012		MAX_2-S-1.nd2	27	32.22	8.37989
MAX_3-S-2.nd2:0002-0512-0537	799.607		61	31.712	19.2356			MAX_7-S-2.nd2:0002-0512-0573	270.041		11	31.762	3.46326				MAX_2-S-2.nd2:0002-0469-0512	880.395		21	32.22	6.51769			MAX_3-T-1.nd2:0002-0512-0541	491.908		19	32.49	5.84795				MAX_7-T-1.nd2:0002-0512-0396	547.329		7	31.449	2.22583				MAX_3-F-1.nd2:0002-0604-0517	386.667		MAX_2-S-1.nd2	22	32.688	6.7303
MAX_3-P-2.nd2:0002-0512-0489	830.677	725.907	64	30.676	20.8632	17.433		MAX_7-P-2.nd2:0002-0512-0562	299.66	291.374	9	30.156	2.98448	3.10317			MAX_2-P-2.nd2:0002-0413-0512	592.792	768.237	45	31.225	14.4115	11.1573		MAX_3-S-1.nd2:0002-0512-0537	582.262		17	31.712	5.36075				MAX_7-S-1.nd2:0002-0512-0573	509.14		19	31.762	5.98199				MAX_3-P-1.nd2:0002-0512-0595	348.775	455.911	MAX_2-P-1.nd2	6	31.225	1.92154
MAX_2-T-2.nd2:0002-0512-0443	551.667		20	36.375	5.49828			MAX_6-T-2.nd2:0002-0458-0512	185.379		1	29.914	0.334292				MAX_4-T-2.nd2:0002-0512-0517	356.425		33	32.568	10.1326			MAX_3-P-1.nd2:0002-0512-0489	542.834	481.26	13	30.676	4.23784	4.40677			MAX_7-P-1.nd2:0002-0512-0562	366.939	474.469	11	30.156	3.6477	3.95184			MAX_4-S-1.nd2:0002-0501-0512	767.333		MAX_3-F-1.nd2	13	67.733	1.9193
MAX_2-P-2.nd2:0002-0512-0531	746.788	649.227	19	31.828	5.96959	5.73393		MAX_6-S-2.nd2:0002-0403-0512	226.96		1	33.188	0.301314				MAX_4-S-2.nd2:0002-0501-0512	468.593		18	67.733	2.65749			MAX_2-T-1.nd2:0002-0512-0443	589.536		17	36.375	4.67354				MAX_6-T-1.nd2:0002-0458-0512	321.792		2	29.914	0.668583				MAX_4-T-1.nd2:0002-0512-0517	558.977		MAX_3-T-1.nd2	9	32.64	2.75735
MAX_1-S-2.nd2:0002-0512-0531	488.714		48	31.207	15.3812			MAX_6-P-2.nd2:0002-0535-0512	179.814	197.384	1	32.429	0.308366				MAX_4-T-2.nd2:0002-0512-0547	382.462		18	50.512	3.56351			MAX_2-P-1.nd2:0002-0512-0531	867.613	728.574	11	31.828	3.45608	4.06481			MAX_6-S-1.nd2:0002-0403-0512	320.703		1	33.188	0.301314				MAX_4-T-1.nd2:0002-0512-0547	673.413		MAX_3-F-1.nd2	7	32.568	2.14935
MAX_1-P-2.nd2:0002-0512-0496	715.558		52	31.199	16.6672			MAX_5-P-2.nd2:0002-0518-0512	275.781		24	31.612	7.59205	2.13401			MAX_4-S-2.nd2:0002-0499-0512	478.478		10	32.64	3.06373	4.85434		MAX_1-S-1.nd2:0002-0512-0531	504.364		17	31.207	5.4475				MAX_6-P-1.nd2:0002-0535-0512	326.807	323.101	4	32.429	1.23346				MAX_4-S-1.nd2:0002-0499-0512	762.026		MAX_3-P-1.nd2	4	50.512	0.791891
MAX_1-F-2.nd2:0002-0512-0534	815.3	673.191	49	31.183	15.7137	15.9207		MAX_5-S-2.nd2:0002-0512-0512	285.471	280.626	14	30.058	4.65766				MAX_4-F-2.nd2:0002-0546-0510	319.325	401.057	7	30.663	2.28288			MAX_1-P-1.nd2:0002-0512-0496	712.787		27	31.199	8.65412				MAX_5-P-1.nd2:0002-0518-0512	349.411		12	31.612	3.79603	1.49985			MAX_4-F-1.nd2:0002-0546-0510	445.693	641.488	MAX_11-T-1.nd2	3	30.663	0.978378
MAX_1-T-2.nd2:0002-0512-0511	631.637		29	30.608	9.47465	9.47465		MAX_4-T1-2.nd2:0002-0221-0512	341.639		16	31.28	5.11509	4.88638			MAX_11-S-2.nd2:0002-0512-0593	279.739		5	32.206	1.55251			MAX_1-F-1.nd2:0002-0512-0534	787.011	668.054	12	31.183	3.84825	5.98329			MAX_5-S-1.nd2:0002-0512-0512	252.027	300.719	2	30.058	0.66538				MAX_11-T-1.nd2:0002-0613-0520	398.31		MAX_11-S-1.nd2	6	32.206	1.86301
MAX_10-T-3.nd2:0002-0526-0512	641.403	641.403	25	31.493	7.93827			MAX_4-T-2.nd2:0002-0512-0675	245.371		6	30.214	1.98583				MAX_11-P-2.nd2:0002-0512-0564	285.816		16	31.471	5.08405			MAX_1-T-1.nd2:0002-0512-0511	803.154		9						MAX_4-T1-1.nd2:0002-0221-0512	389.139		3	31.28	0.959079	0.81223			MAX_11-S-1.nd2:0002-0512-0593	353.333		MAX_11-P-1.nd2	16	31.471	5.08405
MAX_9-T-2.nd2:0002-0473-0512	579.83		24	31.407	7.64161			MAX_4-S-2.nd2:0002-0604-0512	317.496		13	41.631	3.12267				MAX_11-F-2.nd2:0002-0512-0420	386.243	317.266	9	31.683	2.84064	2.94002		MAX_10-T-1.nd2:0002-0526-0512	750.263	750.263	5	30.608	1.63356	1.63356			MAX_4-T-1.nd2:0002-0512-0675	261.824		7	30.214	2.31681				MAX_11-P-1.nd2:0002-0512-0564	400.85		MAX_11-F-1.nd2	3	31.683	0.94688
MAX_9-S-2.nd2:0002-0512-0545	613.263		65	30.754	21.1355			MAX_4-P-2.nd2:0002-0582-0512	283.264		27	31.596	8.54539				MAX_5-F-2.nd2:0002-0813-0512	446.696	446.696	22	34.123	6.44726			MAX_9-T-1.nd2:0002-0473-0512	613.295		14	31.493	4.44543				MAX_4-S-1.nd2:0002-0604-0512	357.258		9	41.631	2.16185				MAX_11-F-1.nd2:0002-0512-0420	621.088	443.395	MAX_10-T-1.nd2	0	31.737
MAX_9-P-2.nd2:0002-0512-0476	622.722		58	30.705	18.8894	13.9012		MAX_4-F-2.nd2:0002-0512-0712	279.53	293.46	20	32.069	6.23655				MAX_10-T-2.nd2:0002-0498-0507	282		8	31.737	2.52072			MAX_9-S-1.nd2:0002-0512-0545	467.1		18	31.407	5.73121				MAX_4-P-1.nd2:0002-0582-0512	299.965		8	31.596	2.53197				MAX_10-T-1.nd2:0002-0498-0507	247.715		MAX_10-S-1.nd2	9	30.072	2.99282
MAX_9-F-2.nd2:0002-0481-0512	685.984	625.45	30	32.65	9.18836			MAX_3-S-2.nd2:0002-0512-0681	313.429		26	31.119	8.35502	5.64909			MAX_10-S-2.nd2:0002-0581-0514	342.446		15	30.072	4.98803			MAX_9-P-1.nd2:0002-0512-0476	524.145		37	30.754	12.031				MAX_4-F-1.nd2:0002-0512-0712	289.579	319.553	10	32.069	3.11828				MAX_10-S-1.nd2:0002-0581-0514	299.435		MAX_10-P-1.nd2	14	31.567	4.43501
MAX_8-T-2.nd2:0002-0606-0512	328.055		16	30.759	5.20173			MAX_3-F-2.nd2:0002-0509-0609	269.723		17	31.337	5.4249				MAX_10-P-2.nd2:0002-0613-0512	309.939		54	31.567	17.1065			MAX_9-F-1.nd2:0002-0481-0512	629.705	558.561	10	30.705	3.2568	6.3661			MAX_3-S-1.nd2:0002-0512-0681	237.577		6	31.119	1.92808	2.4114			MAX_10-P-1.nd2:0002-0613-0512	252.668		MAX_10-F-1.nd2	1	52.003	0.192297
MAX_8-S-2.nd2:0002-0490-0512	292.755		11	39.088	2.81416	5.73475		MAX_3-P-2.nd2:0002-0440-0512	356.169	313.107	12	29.711	4.03891	4.7319			MAX_10-F-2.nd2:0002-0504-0584	296.573	307.74	18	52.003	3.46134	7.01914		MAX_8-T-1.nd2:0002-0606-0512	599.716		17	32.65	5.20674				MAX_3-F-1.nd2:0002-0509-0609	317.072		5	31.337	1.59556				MAX_10-F-1.nd2:0002-0504-0584	248.145	261.991
MAX_8-F-2.nd2:0002-0512-0469	426.862	349.224	25	31.085	8.04246												MAX_9-S-2.nd2:0002-0507-0554	320.948		11	30.04	3.66178			MAX_8-S-1.nd2:0002-0490-0512	712.109		15	30.759	4.87662				MAX_3-P-1.nd2:0002-0440-0512	326.428	293.692	5	29.711	1.68288	1.63922			MAX_9-S-1.nd2:0002-0507-0554	358.914		MAX_9-S-1.nd2	10	30.04	3.32889
MAX_7-T-2.nd2:0002-0522-0512	386.265		14	32.173	4.35147												MAX_9-P-2.nd2:0002-0332-0512	292.024	306.486	12	30.77	3.8999	3.78084		MAX_8-F-1.nd2:0002-0512-0469	554.758	622.194	11	39.088	2.81416	4.29917												MAX_9-F-1.nd2:0002-0512-0625	307.57		MAX_9-P-1.nd2	6	30.77	1.94995
MAX_7-F-2.nd2:0002-0489-0512	327.35		13	31.603	4.11353												MAX_8-P-2.nd2:0002-0512-0662	337.501		7	30.531	2.29275			MAX_7-T-1.nd2:0002-0522-0512	417.352		8	31.085	2.57359													MAX_9-P.nd2:2	376.781	347.755	MAX_8-P-1.nd2	14	30.531	4.5855
MAX_7-S-2.nd2:0002-0563-0512	341.226		17	31.301	5.43114	5.48465											MAX_8-S-2.nd2:0002-0512-0530	319.183		15	31.206	4.80677			MAX_7-F-1.nd2:0002-0489-0512	413.532		8	32.173	2.48656													MAX_8-P-1.nd2:0002-0512-0662	415.676		MAX_8-S-1.nd2	14	31.206	4.48632
MAX_7-P-2.nd2:0002-0512-0458	444.955	374.949	15	31.938	4.6966												MAX_8-T-2.nd2:0002-0512-0712	303.6	320.095	8	31.4	2.54777			MAX_7-S-1.nd2:0002-0563-0512	314.545		5	31.603	1.58213													MAX_8-S-1.nd2:0002-0512-0530	405.409		MAX_8-T-1.nd2	9	31.4	2.86624
MAX_6-P-2.nd2:0002-0512-0440	425.478		39	31.896	12.2272												MAX_9-F-2.nd2:0002-0512-0625	325.708		2	34.108	0.586373			MAX_7-P-1.nd2:0002-0512-0458	373.752	379.795	5	31.301	1.59739	2.05992												MAX_8-T-1.nd2:0002-0512-0712	341.82		MAX_9-F-1.nd2	2	34.108	0.586373
MAX_6-S-2.nd2:0002-0512-0468	393.496		23	32.72	7.02934												MAX_8-F-2.nd2:0002-0508-0690	298.846	312.277	10	43.74	2.28624	2.50398		MAX_6-P-1.nd2:0002-0512-0440	318.904		6	31.938	1.87864													MAX_8-F-1.nd2:0002-0508-0690	432.066	398.743	MAX_8-F-1.nd2	9	43.74	2.05761
MAX_6-F-2.nd2:0002-0512-0579	327.984	382.319	14	11.259	12.4345	9.09692											MAX_5-P-2.nd2:0002-0512-0621	338.274		33	31.356	10.5243			MAX_6-S-1.nd2:0002-0512-0468	394.068		5	31.896	1.56759													MAX_5-P-1.nd2:0002-0512-0621	221.691		MAX_5-S-1.nd2	3	31.11	0.96432
																				31	31.11	9.96464			MAX_6-F-1.nd2:0002-0512-0579	397.79	370.254	6	11.259	5.32907	2.9251												MAX_5-F-1.nd2:0002-0813-0512	282.789		MAX_5-F-1.nd2	1	34.123	0.293057
																	MAX_5-S-2.nd2:0002-0512-0489	340.81		22	34.123	6.44726																					MAX_5-S-1.nd2:0002-0512-0489	210.072
																	MAX_5-T-2.nd2:0002-0513-0645	345.653	341.579	13	31.005	4.19287	7.78227																				MAX_5-T-1.nd2:0002-0513-0645	275.204	247.439	MAX_5-T-1.nd2	5	31.005	1.61264
																	MAX_6-S-2.nd2:0002-0512-0623	340.992		20	45.606	4.38539																					MAX_6-S-1.nd2:0002-0512-0623	268.14		MAX_6-S-1.nd2	6	45.606	1.31562
																	MAX_6-P-2.nd2:0002-0511-0712	402.741	371.866	11	38.304	2.87176	3.62858																				MAX_6-P-1.nd2:0002-0511-0712	321.775	294.957	MAX_6-P-1.nd2	6	38.304	1.56642
																	MAX_7-P-2.nd2:0002-0512-0568	307.481		12	40.886	2.93499																					MAX_7-P-1.nd2:0002-0512-0568	351.386		MAX_7-P-1.nd2	16	40.886	3.91332
																	MAX_7-T-2.nd2:0002-0533-0702	328.189		8	31.672	2.52589																					MAX_7-T-1.nd2:0002-0533-0702	440.338		MAX_7-T-1.nd2	7	31.672	2.21015
																	MAX_7-S-2.nd2:0002-0512-0437	332.817		9	31.459	2.86087																					MAX_7-S-1.nd2:0002-0512-0437	388.18		MAX_7-S-1.nd2	11	31.459	3.49661
																	MAX_7-F-2.nd2:0002-0509-0512	294.518	315.751	6	33.004	1.81796	2.53493																				MAX_7-F-1.nd2:0002-0509-0512	384.367	391.068	MAX_7-F-1.nd2	9	33.004	2.72694
	normalize
	mean intensity																number
GPN_Ctrl	GPN_LatA	GPN_Noco	Average	GPN_Ctrl	GPN_LatA	GPN_Noco	sγ2_Ctrl	sγ2_LatA	sγ2_Noco	Average	sγ2_Ctrl	sγ2_LatA	sγ2_Noco				GPN_Ctrl	GPN_LatA	GPN_Noco	Average	GPN_Ctrl	GPN_LatA	GPN_Noco	sγ2_Ctrl	sγ2_LatA	sγ2_Noco	Average	sγ2_Ctrl	sγ2_LatA	sγ2_Noco
882.541	595.2	657.705	596.607	1.47927	0.997641	1.10241	420.231	630.865	373.984	492.17	0.853833	1.2818	0.759868				13.2421	10.2248	7.77884	5.45014	2.42969	1.87606	1.42727	13.0022	13.1021	5.41542	7.01268	1.8541	1.86835	0.772232
686.95	584.946	642.194	596.607	1.15143	0.980454	1.07641	661.609	381.453	214.382	492.17	1.34427	0.775043	0.435584				6.38761	5.97332	6.89584	5.45014	1.17201	1.09599	1.26526	9.27877	7.59974	5.21748	7.01268	1.32314	1.08371	0.744007
664.749	545.964	594.816	596.607	1.11421	0.915114	0.996997	453.106	386.301	403.515	492.17	0.920629	0.784892	0.819869				5.67012	5.33567	5.88891	5.45014	1.04036	0.978997	1.08051	8.56641	6.47265	5.21699	7.01268	1.22156	0.922992	0.743936
649.954	542.735	561.161	596.607	1.08942	0.909703	0.940586	636.126	453.923	445.669	492.17	1.29249	0.922287	0.905518				5.06668	5.04534	5.46011	5.45014	0.929644	0.925728	1.00183	6.93528	5.91882	5.21193	7.01268	0.988963	0.844016	0.743215
638.187	542.662	555.469	596.607	1.06969	0.90958	0.931046	331.425	477.102	519.56	492.17	0.673395	0.969384	1.05565				5.05318	4.50153	5.41537	5.45014	0.927166	0.825948	0.99362	6.8999	5.85392	4.40745	7.01268	0.983917	0.834762	0.628497
562.055	530.345	540.903	596.607	0.942085	0.888935	0.906632	596.534	629.202	544.016	492.17	1.21205	1.27842	1.10534				4.74913	4.41435	5.28812	5.45014	0.871378	0.809952	0.970272	6.47211	5.18775	4.24046	7.01268	0.922916	0.739767	0.604684
557.092	529.894	535.923	596.607	0.933766	0.888179	0.898285	453.817	435.076	325.445	492.17	0.922073	0.883994	0.661244				4.6887	4.38937	4.6327	5.45014	0.860291	0.805368	0.850015	6.21048	5.17859	3.90991	7.01268	0.885606	0.73846	0.557548
543.264	528.033	535.426	596.607	0.910589	0.88506	0.897451	435.173	671.716	529.825	492.17	0.884192	1.3648	1.07651				4.47529	4.15495	3.75574	5.45014	0.821134	0.762357	0.689109	5.72991	5.04838	3.74952	7.01268	0.817079	0.719893	0.534678
540.503	523.74	518.954	596.607	0.905961	0.877864	0.869841	579.369	213.174	368.774	492.17	1.17717	0.43313	0.749282				4.01256	3.70559	3.62357	5.45014	0.73623	0.679908	0.664859	5.20646	4.19169	3.1808	7.01268	0.742435	0.59773	0.453578
529.308	502.911	483.305	596.607	0.887197	0.842952	0.81009	441.582	334.88	360.214	492.17	0.897214	0.680416	0.731888				3.63423	3.38639	3.34572	5.45014	0.666815	0.621341	0.613878	4.47778	4.13573	2.4245	7.01268	0.638525	0.589751	0.34573
460.624	488.88	437.001	596.607	0.772072	0.819433	0.732476	404.901	455.835		492.17	0.822685	0.926174					2.97184	3.04432	1.48158	5.45014	0.545278	0.558578	0.271843	4.36016	3.3431	1.37757	7.01268	0.621754	0.476722	0.19644
444.063	486.812		596.607	0.744314	0.815968		492.17	494.108		492.17	1	1.00394					5.45014	2.95994		5.45014	1	0.543094		7.01268	3.24667		7.01268	1	0.462971
596.607	473.432		596.607	1	0.793541													2.21201		5.45014		0.405864			2.72064		7.01268		0.38796
725.907	452.505	768.237	559.325	1.29783	0.809019	1.37351	750.263	525.325	827.774	551.653	1.36003	0.952274	1.50053				17.433	6.80038	11.1573	9.93165	1.7553	0.684718	1.12341	6.3661	4.5551	5.67724	3.97723	1.60064	1.14529	1.42744
673.191	422.988	446.696	559.325	1.20358	0.756248	0.798634	728.574	522.207	641.488	551.653	1.32071	0.946621	1.16285				15.9207	6.05873	7.78227	9.93165	1.60303	0.610043	0.783583	5.98329	3.95184	3.97935	3.97723	1.50439	0.993616	1.00053
649.227	313.107	401.057	559.325	1.16073	0.559795	0.717037	668.054	474.469	603.79	551.653	1.211	0.860086	1.09451				13.9012	5.64909	7.01914	9.93165	1.39969	0.568797	0.706745	5.46106	3.65483	3.63548	3.97723	1.37308	0.918939	0.914073
641.403	293.46	376.719	559.325	1.14675	0.524668	0.673525	622.194	323.101	455.911	551.653	1.12787	0.585695	0.826446				9.50883	4.88638	4.85434	9.93165	0.957427	0.492	0.488775	4.40677	2.4114	3.08676	3.97723	1.108	0.606301	0.776108
627.68	291.374	371.866	559.325	1.12221	0.520938	0.664849	558.561	319.553	443.395	551.653	1.01252	0.579264	0.803757				9.47465	4.7319	4.03929	9.93165	0.953985	0.476447	0.406709	4.29917	1.63922	2.63942	3.97723	1.08095	0.412151	0.663634
625.45	280.626	341.579	559.325	1.11822	0.501723	0.610699	481.26	300.719	398.743	551.653	0.872395	0.545123	0.722814				9.09692	3.10317	3.78084	9.93165	0.915952	0.312453	0.380686	4.06481	1.49985	2.58498	3.97723	1.02202	0.377109	0.649944
543.897	197.384	331.028	559.325	0.972418	0.352898	0.591835	479.798	293.692	391.068	551.653	0.869746	0.532386	0.708901				7.0279	2.13401	3.62858	9.93165	0.707627	0.214869	0.365355	2.9251	0.81223	2.54004	3.97723	0.735462	0.20422	0.638646
382.319		320.095	559.325	0.683537		0.572288	477.779		347.755	551.653	0.866085		0.630387				5.73475		2.94002	9.93165	0.577422		0.296025	2.57251		2.21808	3.97723	0.646809		0.557694
374.949		317.266	559.325	0.67036		0.56723	379.795		294.957	551.653	0.688467		0.534679				5.73393		2.90257	9.93165	0.57734		0.292255	2.05992		1.90447	3.97723	0.517928		0.478844
349.224		315.751	559.325	0.624367		0.564522	370.254		261.991	551.653	0.671172		0.474919				5.48465		2.53493	9.93165	0.55224		0.255237	1.63356		1.44102	3.97723	0.410728		0.362317
559.325		312.277	559.325	1		0.558311	551.653		247.439	551.653	1		0.448541				9.93165		2.50398	9.93165	1		0.252121	3.97723		1.32199	3.97723	1		0.33239
		307.74	559.325			0.550198																				0.956674	3.97723			0.240538
		306.486	559.325			0.547957
[truncated: 1 more columns]

## Sheet: Figure 6I
	GPN-60min			GPN-120min			gamma2-60min			gamma2-120min
1st	ctrl	LatA	Noco	ctrl	LatA	Noco	ctrl	LatA	Noco	ctrl	LatA	Noco
	0.677134	0.834773	0.728618	2.73535	1.98398	1.42863	1.32441	0.578216	0.848464	1.07561	0.488576	0.564276
	1.48137	1.21997	0.589244	2.66178	1.89835	1.38252	1.14305	0.974057	0.804286	0.411574	1.02558	0.905937
	0.756888	1.17276	1.11637	2.31865	1.3984	1.3737	1.40378	1.24388	1.01724	0.738681	1.07731	0.882303
	0.449677	1.13256	0.416579	2.11889	1.36907	1.31098	0.690867	0.68043	0.739597	0.417146	1.6951	0.61165
	0.83009	0.752872	0.622089	1.75321	1.36184	1.23862	0.742786	1.92377	0.797391	1.35345	0.871349	0.885368
	1.17703	0.656136	0.637911	1.57433	1.04382	1.1862	1.32576	0.651833	0.907128	0.931246	0.298922	0.227084
	0.944003	0.961923	0.826587	1.15306	0.958601	1.14838	1.2588	0.80646	0.85063	0.58044	0.324416	0.243986
	1.4143	0.8183	0.633477	1.10929	0.899551	1.04389	1.79912	0.74526	0.793656	1.14867	0.704201	0.138765
	1.35207	0.833332	0.897183	1.01373	0.879754	1.01065	1.2347	0.791648	1.43244	0.887667	0.559056	0.326539
	1.42271	0.807349	1.20278	1.00444	0.850349	0.976483	1.36379	1.00986	0.849043	1.96194	0.328679	0.612196
	0.989636	0.877816	0.930313	0.936276	0.789488	0.939593	1.45373	0.638525	0.9069	1.50746	1.21416	0.418407
	1.62016	0.50175	0.673845	0.910396	0.765047	0.863599	1.04948	0.577712	1.10805	0.949143	1.02734	0.688174
	1.22032	0.413455	0.544427	0.908141	0.756767	0.858593	1.13352	0.568305	0.918447	0.958883	0.459311	0.234458
	1.5116	0.874624	0.746631	0.887972	0.752338	0.80551	1.48643	0.712524	0.975445	0.325039	0.550968	0.481074
	1.4382	0.649784	0.792631	0.874505	0.746724	0.78651	1.31052	1.23379	1.1411	0.646274	0.569059	0.642017
	1.47823	0.880806	0.575745	0.814434	0.71188	0.784364	1.02782	0.801351	0.835706	0.471146	0.138051	1.66372
	1.77269	0.907866	0.652597	0.805606	0.695314	0.752551	1.57996	1.02032	0.809346	1.57564	1.00242	0.714844
	1.23146	0.494746	0.69207	0.801083	0.685903	0.749603	0.970284	1.00356	1.02518	1.03665	0.47026	0.291025
	1.82369	0.46139	0.477442	0.792691	0.663168	0.686008	0.791077	0.577693	0.822795	0.79622	0.863422	0.683964
	1.36885	0.837393	0.491597	0.758158	0.645106	0.669682	0.60904	0.668001	0.630868	1.37624	1.5873	0.514499
	0.887667	0.756564	0.747497	0.708423	0.621888	0.661497	0.800375	1.02475	0.636113	0.379152	1.16059	1.02675
	0.817206	0.620903	0.686823	0.703643	0.610066	0.654238	1.0294	0.883221	0.743016	0.842655	1.08229	0.768251
	0.49117	0.596307	0.687905	0.609833	0.54688	0.642227	1.08	0.783337	0.798869	1.36432	1.45144	0.517753
	1.27004	0.778742	0.761816	0.598692	0.500708	0.602724	0.781149	0.634915	1.83964	0.795964	0.420022	0.184904
	1.38138	0.625736	0.444088	0.555825	0.483005	0.600944	0.744612	0.723947	1.06184	1.67347	0.616585	1.02822
	1.07941	0.581723	0.54353	0.550831	0.48175	0.594797	0.912037	0.734384	0.853892	0.82364	0.491772	0.59444
	0.798195	0.528565	0.719513	0.546046	0.457316	0.509355	0.810161	0.774031	0.894621	1.6105	1.44662	0.657029
	0.689602	0.470184	0.931222	0.541451	0.446445	0.503985	0.689824	0.729743	1.46608	1.01586	0.345446	0.84636
	1.56198	0.500278	0.796556	0.508275	0.429076	0.457491	0.745651	0.906149	0.780293	1.62688	0.828126	0.773486
	0.772434	0.821677	0.547506	0.495682	0.414685	0.449297	0.854144	1.20159	1.42048	1.34363	0.660913	0.393737
	0.642714	1.71902	0.948887	0.448861	0.410793	0.405289	1.11519	1.55138	0.840579	1.06997	0.308894	1.06277
	0.836949	0.71926	0.459837	0.401335	0.402666	0.403954	0.635405	1.71547	0.630607	0.989309	0.234592	0.370819
	0.687953	0.444223	0.555883	0.3991	0.366099	0.340685	0.981501	0.682002	0.64707	1.03484	1.03253	0.990001
	0.782171	1.0685	0.787956		0.358697	0.203213	0.684492	0.738567	0.74543	0.280698	0.564384	0.739228
	0.646632	0.643432	0.483279		0.355554	0.199769	0.713592	0.797432	1.143		0.233926	0.918096
	0.862378	0.715103	0.856393		0.355045	0.104883	0.621107	0.746001	1.26405		1.06775	0.233737
	0.725761	1.02356	0.881118		0.354831	0.0741853	1.14387	1.09044	1.02059		0.611182
	0.58022	0.446211	0.926833		0.352946		0.849084	0.743371	0.798232		0.459698
	0.688722	0.683268	0.492566		0.351999		0.803462	0.851062	0.84886		0.186176
	0.991423	0.908516	0.675562		0.304839		0.939663	1.6686	0.683087		0.141783
	0.82412	0.54222	0.480931		0.204241		1.30486	1.27151	0.726775		1.46373
	0.792048	0.686694	0.679066		0.201845		0.832254	0.632501	0.684597		0.601335
	0.861646	0.552875	0.602906		0.160829		1.06423	0.742942	0.809544		0.231493
	1.32449	0.984754	0.5415		0.152186		0.740639	0.752086	0.686901
	0.640097	0.914577	0.787028				1.06371	0.634552	0.911726
	0.916059	0.87443	0.687637				0.698066	1.22499	0.909065
	0.730107	0.566845					0.662583	1.09138
	0.632934	0.679498						1.07779
	0.669627	0.50978						0.792833
	0.516369	0.732915						0.692145
	0.938382							1.07112
2nd
	1.28379	0.635486	0.61297	2.42969	1.87606	1.42727	1.74649	0.951275	0.815243	1.8541	1.86835	0.772232
	1.20364	0.635199	0.4133	1.17201	1.09599	1.26526	1.53715	0.854034	0.786912	1.32314	1.08371	0.744007
	1.19412	0.571453	0.334946	1.04036	0.978997	1.08051	1.16697	0.843729	0.703678	1.22156	0.922992	0.743936
	1.17381	0.39229	0.322913	0.929644	0.925728	1.00183	1.11009	0.629606	0.687134	0.988963	0.844016	0.743215
	1.09903	0.391312	0.300142	0.927166	0.825948	0.99362	1.09673	0.615218	0.666641	0.983917	0.834762	0.628497
	0.964233	0.383393	0.25014	0.871378	0.809952	0.970272	1.05942	0.541283	0.63578	0.922916	0.739767	0.604684
	0.900924	0.374204	0.170606	0.860291	0.805368	0.850015	0.938983	0.522297	0.56328	0.885606	0.73846	0.557548
	0.895339	0.303116	0.168466	0.821134	0.762357	0.689109	0.619316	0.482292	0.453627	0.817079	0.719893	0.534678
	0.693848	0.281074	0.136219	0.73623	0.679908	0.664859	0.577916	0.391054	0.383535	0.742435	0.59773	0.453578
	0.591264	1.68812	0.122233	0.666815	0.621341	0.613878	0.573472	2.21573	0.362859	0.638525	0.589751	0.34573
	1.94741	1.11619	0.955114	0.545278	0.558578	0.271843	0.573472	1.38577	1.42007	0.621754	0.476722	0.19644
	1.75507	0.874344	0.888503	1.7553	0.543094	1.12341	1.10381	1.36048	1.38537	1.60064	0.462971	1.42744
	1.43512	0.854617	0.785101	1.60303	0.405864	0.783583	0.444896	1.17027	1.32989	1.50439	0.38796	1.00053
	1.30255	0.771086	0.643293	1.39969	0.684718	0.706745	1.66029	0.927373	1.17586	1.37308	1.14529	0.914073
	1.10731	0.73677	0.642473	0.957427	0.610043	0.488775	1.47051	0.793994	1.15129	1.108	0.993616	0.776108
	1.05042	0.720072	0.616307	0.953985	0.568797	0.406709	2.4505	0.772886	1.1199	1.08095	0.918939	0.663634
	1.01707	0.692461	0.60665	0.915952	0.492	0.380686	1.12957	0.726797	0.803416	1.02202	0.606301	0.649944
	0.731793	0.603729	0.602877	0.707627	0.476447	0.365355	0.916802	0.627092	0.785665	0.735462	0.412151	0.638646
	0.707328	0.594619	0.552416	0.577422	0.312453	0.296025	0.610672	0.603609	0.755608	0.646809	0.377109	0.557694
	0.693923	0.574719	0.496913	0.57734	0.214869	0.292255	0.876153	0.496479	0.655693	0.517928	0.20422	0.478844
	0.673637	0.550079	0.476015	0.55224		0.255237	0.560191	0.447365	0.557534	0.410728		0.362317
	0.594295	0.390071	0.471056			0.252121	0.695542	0.435036	0.501248			0.33239
	0.528869	1.42458	0.465356				0.874865	0.115283	0.420279			0.240538
	0.455197	0.987455	0.441158				0.975275	1.6516	0.253901
	1.32173	0.733043	1.50792				0.869693	0.494413	1.12158
	1.00473	0.69527	1.25595				0.361238	0.564987	0.591237
	0.950372	0.294593	0.855				0.645951	1.03096	0.397332
	0.816412	0.977062	0.742452				0.662487	1.58366	0.428931
	0.738244	0.92175	0.56955				0.983275	0.735518	0.741385
	1.29079	0.497877	0.359165				2.01579	0.432732	0.478113
	1.28256	0.389403	0.328627				1.47241		0.609559
	1.15062		0.895411				0.557172
	0.616793		0.690991				0.662919

## Sheet: Figure 6J & 6K
60 min			120 min					60 min			120 min
Ctrl_Pearson's correlation	LatA_Pearson's correlation	Noco_Pearson's correlation	Ctrl_Pearson's correlation	LatA_Pearson's correlation	Noco_Pearson's correlation			Ctrl_Mander's overlap	LatA_Mander's overlap	Noco_Mander's overlap	Ctrl_Mander's overlap	LatA_Mander's overlap	Noco_Mander's overlap
0.456855	0.475264	0.51026	0.656855	0.675264	0.71026			0.591457	0.603357	0.583237	0.691457	0.703357	0.683237
0.582858	0.445478	0.361131	0.782858	0.645478	0.561131			0.725394	0.701105	0.437306	0.825394	0.801105	0.537306
0.590426	0.452415	0.472983	0.790426	0.652415	0.672983			0.675475	0.550957	0.567775	0.775475	0.650957	0.667775
0.554572	0.325098	0.485438	0.754572	0.525098	0.685438			0.694632	0.500339	0.656649	0.794632	0.600339	0.756649
0.479961	0.336434	0.357729	0.679961	0.536434	0.557729			0.60928	0.443155	0.50592	0.70928	0.543155	0.60592
0.427846	0.356836	0.284975	0.627846	0.556836	0.484975			0.524314	0.544157	0.512717	0.624314	0.644157	0.612717
0.31077	0.406787	0.347564	0.51077	0.606787	0.547564			0.659004	0.657821	0.488083	0.759004	0.757821	0.588083
0.503481	0.587186	0.388559	0.703481	0.787186	0.588559			0.569031	0.489769	0.584862	0.669031	0.589769	0.684862
0.511135	0.337484	0.433405	0.711136	0.537484	0.633405			0.570793	0.528215	0.521222	0.670794	0.628215	0.621222
0.503917	0.450102	0.442681	0.703917	0.650102	0.642681			0.780292	0.605614	0.703446	0.880292	0.705614	0.803446
0.656159	0.590107	0.470089	0.856159	0.790107	0.670089			0.776335	0.565593	0.544766	0.876335	0.665593	0.644766
0.342277	0.522722	0.444661	0.542277	0.722722	0.53			0.789296	0.47381	0.512509	0.889296	0.57381	0.908
0.668628	0.355936	0.384667	0.868628	0.555936	0.626667			0.701024	0.540037	0.523302	0.9423	0.640037	0.9053
0.563691	0.407249	0.471125	0.59	0.607249	0.538			0.807767	0.463549	0.686536	0.963	0.563549	0.875
0.608678	0.410003	0.451832	0.58	0.610003	0.506667			0.795974	0.499504	0.83881	0.941	0.599504	0.9415
0.473751	0.444937	0.303297	0.554	0.644937	0.503333			0.587865	0.55039	0.478835	1.0625	0.65039	0.878
0.402378	0.296769	0.6025	0.553333	0.53	0.566667			0.577996	0.298768	0.608	1.0547	0.931	0.712
0.547097	0.181469	0.62	0.5725	0.5375	0.524			0.730296	0.540635	0.6053	0.9564	0.85975	0.454
0.676153	0.456333	0.5175	0.551667	0.5	0.646667			0.669079	0.631	0.575	1.033	0.934667	0.6558
0.582327	0.71	0.595	0.59	0.494	0.52			0.773262	0.55975	0.6415	0.9873	0.91	0.935
0.416702	0.725	0.533333	0.5975	0.475	0.6			0.636741	0.634667	0.578	0.976	1.01233	0.819
0.60904	0.656667	0.4725	0.68	0.508				0.678348	0.61	0.412	0.9893	1.0215
0.521305	0.626667	0.535	0.585444	0.55				0.6423	0.712333	0.154		0.924
0.635	0.68	0.5525						0.663	0.7215	0.3558
0.67	0.735	0.583333						0.641	0.624	0.635
0.646	0.615	0.66						0.7625	0.56375	0.519
0.73	0.65							0.7547	0.628667
0.7067	0.66							0.6564
0.628								0.733
0.685								0.6873
0.6675								0.676
0.6633								0.6893
0.62								0.69055
0.66515
