# Supplementary material for: Endophilin A1 facilitates organization of the GABAergic postsynaptic machinery to maintain excitation-inhibition balance
Source: eLife. 2025 Oct 2;13:RP102792. doi: 10.7554/eLife.102792 (PMC12490859; doi:10.7554/eLife.102792)
Supplement: Figure 7—source data 1. [file elife-102792-fig7-data1.xlsx]

## Sheet: Fig 7B_raw data
GFP + Vector				GFP + Vector
Source	mean intensity	mean intensity of per neuron		Source	number	length	number of per 10 μm	number of per neuron
MAX_2022.12.05-GFP-1-P-1.nd2:0001-0511-0503	427.887			MAX_2022.12.05-GFP-1-P-1.nd2	33	31.567	10.454
MAX_2022.12.05-GFP-1-S-1.nd2:0002-0512-0743	665.838	546.862		MAX_2022.12.05-GFP-1-S-1.nd2	47	31.26	15.0352	12.7446
MAX_2022.12.05-GFP-2-S-1.nd2:0001-0512-0750	503.215			MAX_2022.12.05-GFP-2-P-1.nd2	62	31.551	19.6507
MAX_2022.12.05-GFP-2-S1-1.nd2:0001-0348-0512	491.335			MAX_2022.12.05-GFP-2-S-1.nd2	69	67.368	10.2423
MAX_2022.12.05-GFP-2-T-1.nd2:0001-0490-0512	417.602	470.717		MAX_2022.12.05-GFP-2-S1-1.nd2	79	53.466	14.7757
MAX_2022.12.05-GFP-3-F-1.nd2:0001-0512-0521	784.088			MAX_2022.12.05-GFP-2-T-1.nd2	16	31.583	5.06602	12.4337
MAX_2022.12.05-GFP-3-P-1.nd2:0001-0467-0512	533.436			MAX_2022.12.05-GFP-3-F-1.nd2	41	31.862	12.868
MAX_2022.12.05-GFP-3-P1-1.nd2:0001-0512-0301	643.292			MAX_2022.12.05-GFP-3-P-1.nd2	79	31.429	25.136
MAX_2022.12.05-GFP-3-P2-1.nd2:0001-0517-0416	576.748			MAX_2022.12.05-GFP-3-P1-1.nd2	57	50.787	11.2233
MAX_2022.12.05-GFP-3-S-1.nd2:0001-0512-0492	572.373			MAX_2022.12.05-GFP-3-P2-1.nd2	49	30.709	15.9562
MAX_2022.12.05-GFP-3-T-1.nd2:0001-0512-0514	647.512	626.241		MAX_2022.12.05-GFP-3-S-1.nd2	38	31.373	12.1123
MAX_2022.12.05-GFP-4-P-1.nd2:0001-0512-0464	751.613			MAX_2022.12.05-GFP-3-T-1.nd2	39	31.465	12.3947	14.9484
MAX_2022.12.05-GFP-4-S-1.nd2:0001-0437-0504	979.9			MAX_2022.12.05-GFP-4-P-1.nd2	59	31.467	18.7498
MAX_2022.12.05-GFP-4-S1-1.nd2:0001-0512-0540	768.226			MAX_2022.12.05-GFP-4-S-1.nd2	74
MAX_2022.12.05-GFP-4-T-1.nd2:0001-0242-0512	711.658	802.849		MAX_2022.12.05-GFP-4-S1-1.nd2	31	31.521	9.83471	13.6928
MAX_2022.12.05-GFP-5-P-1.nd2:0001-0512-0509	440.796	440.796		MAX_2022.12.05-GFP-4-T-1.nd2	41	32.816	12.4939
MAX_2022.12.05-GFP-6-P-1-1.nd2:0001-0683-0512	563.128			MAX_2022.12.05-GFP-5-P-1.nd2	41	31.852	12.872
MAX_2022.12.05-GFP-6-S-1.nd2:0001-0363-0512	487.105	525.116		MAX_2022.12.05-GFP-6-P-1-1.nd2	34	31.557	10.7742
MAX_2022.12.05-GFP-7-P-1.nd2:0001-0514-0512	635.835	635.835		MAX_2022.12.05-GFP-6-S-1.nd2	29	37.381	7.75795	10.9986
MAX_2022.12.05-GFP-8-F-1.nd2:0001-0512-0433	527.356			MAX_2022.12.05-GFP-7-P-1.nd2	40	31.771	12.5901
MAX_2022.12.05-GFP-8-P-1.nd2:0001-0512-0472	511.343			MAX_2022.12.05-GFP-8-F-1.nd2	20	32.364	6.17971
MAX_2022.12.05-GFP-8-P1-1.nd2:0001-0512-0701	465.817			MAX_2022.12.05-GFP-8-P-1.nd2	42	32.325	12.993
MAX_2022.12.05-GFP-8-S-1.nd2:0001-0482-0526	402.804			MAX_2022.12.05-GFP-8-P1-1.nd2	48	49.225	9.75114
MAX_2022.12.05-GFP-8-T-1.nd2:0001-0512-0514	418.568	465.178		MAX_2022.12.05-GFP-8-S-1.nd2	13	32.539	3.99521
MAX_2022.12.05-GFP-9-F-1.nd2:0001-0527-0512	642.245	642.245		MAX_2022.12.05-GFP-8-T-1.nd2	16	32.747	4.88594	7.56101
				MAX_2022.12.05-GFP-9-F-1.nd2	35	31.405	11.1447	11.1447
GFP-2A-Cre + Vector				GFP-2A-Cre + Vector
Source	mean intensity	mean intensity of per neuron		Source	number	length	number of per 10 μm	number of per neuron
MAX_2022.12.05-CRE-V-1-P-1-1.nd2:0001-0512-0546	390.659			MAX_2022.12.05-CRE-V-1-P-1-1.nd2	45	31.467	14.3007
MAX_2022.12.05-CRE-V-1-S-1.nd2:0001-0511-0449	370.084			MAX_2022.12.05-CRE-V-1-S-1.nd2	15	32.082	4.67552
MAX_2022.12.05-CRE-V-1-T-1-1.nd2:0001-0450-0512	397.452	386.065		MAX_2022.12.05-CRE-V-1-T-1-1.nd2	19	32.026	5.93268	8.30296
MAX_2022.12.05-CRE-V-2-F-1.nd2:0001-0512-0568	269.054			MAX_2022.12.05-CRE-V-2-F-1.nd2	26	35.562	7.31117
MAX_2022.12.05-CRE-V-2-P-1.nd2:0001-0512-0512	396.999			MAX_2022.12.05-CRE-V-2-P-1.nd2	32	31.626	10.1183
MAX_2022.12.05-CRE-V-2-P1-1.nd2:0001-0512-0453	468.154			MAX_2022.12.05-CRE-V-2-P1-1.nd2	51	33.009	15.4503
MAX_2022.12.05-CRE-V-2-S-1.nd2:0001-0514-0512	422.831			MAX_2022.12.05-CRE-V-2-S-1.nd2	27	32.028	8.43012
MAX_2022.12.05-CRE-V-2-S1-1.nd2:0001-0511-0670	540.234	419.454		MAX_2022.12.05-CRE-V-2-S1-1.nd2	23	32.652	7.04398	9.67077
MAX_2022.12.05-CRE-V-3-P-1.nd2:0001-0512-0499	442.419			MAX_2022.12.05-CRE-V-3-P-1.nd2	27	32.277	8.36509
MAX_2022.12.05-CRE-V-3-S-1.nd2:0001-0462-0512	521.71			MAX_2022.12.05-CRE-V-3-S-1.nd2	45	31.444	14.3112
MAX_2022.12.05-CRE-V-3-T-1.nd2:0001-0521-0512	362.125			MAX_2022.12.05-CRE-V-3-T-1.nd2	33	31.688	10.414
MAX_2022.12.05-CRE-V-3-T1-1.nd2:0001-0512-0477	356.474	420.682		MAX_2022.12.05-CRE-V-3-T1-1.nd2	16	33.366	4.7953	9.4714
MAX_2022.12.05-CRE-V-4-P-1.nd2:0001-0512-0607	390.625			MAX_2022.12.05-CRE-V-4-P-1.nd2	38	32.161	11.8156
MAX_2022.12.05-CRE-V-4-S-1.nd2:0001-0510-0207	431.904			MAX_2022.12.05-CRE-V-4-S-1.nd2	28	61.47	4.55507
MAX_2022.12.05-CRE-V-4-T-1.nd2:0001-0512-0192	465.977	429.502		MAX_2022.12.05-CRE-V-4-T-1.nd2	29	33.029	8.78016	8.38359
MAX_2022.12.05-CRE-V-6-1-1.nd2:0001-0512-0514	411.566			MAX_2022.12.05-CRE-V-6-1-1.nd2	15	32.242	4.65232
MAX_2022.12.05-CRE-V-6-P-1.nd2:0002-0512-0538	559.981			MAX_2022.12.05-CRE-V-6-P-1.nd2	43	31.71	13.5604
MAX_2022.12.05-CRE-V-6-S-1.nd2:0001-0239-0512	366.369	445.972		MAX_2022.12.05-CRE-V-6-S-1.nd2	10	31.196	3.20554	7.13942
MAX_2022.12.05-CRE-V-7-P-1.nd2:0001-0494-0512	396.449			MAX_2022.12.05-CRE-V-7-P-1.nd2	21	31.531	6.66011
MAX_2022.12.05-CRE-V-7-S-1.nd2:0001-0463-0512	464.275			MAX_2022.12.05-CRE-V-7-S-1.nd2	12	32.188	3.7281
MAX_2022.12.05-CRE-V-7-S1-1.nd2:0001-0487-0706	383.267			MAX_2022.12.05-CRE-V-7-S1-1.nd2	10	38.561	2.59329
MAX_2022.12.05-CRE-V-7-T-1.nd2:0001-0344-0512	516.099	440.022		MAX_2022.12.05-CRE-V-7-T-1.nd2	15	31.525	4.75813	4.43491
MAX_2022.12.05-CRE-V-8-P-1.nd2:0001-0476-0512	342.764	342.764		MAX_2022.12.05-CRE-V-8-P-1.nd2	35	30.992	11.2932	11.2932
GFP-2A-Cre + EndoA1				GFP-2A-Cre + EndoA1
Source	mean intensity	mean intensity of per neuron		Source	number	length	number of per 10 μm	number of per neuron
MAX_2022.12.05-CRE-A1-1-p-1.nd2:0001-0485-0512	469			MAX_2022.12.05-CRE-A1-1-p-1.nd2	53	31.428	16.8639
MAX_2022.12.05-CRE-A1-1-S-1.nd2:0001-0613-0513	485.274			MAX_2022.12.05-CRE-A1-1-S-1.nd2	51	63.76	7.99875
MAX_2022.12.05-CRE-A1-1-T-1.nd2:0001-0542-0512	532.844	495.706		MAX_2022.12.05-CRE-A1-1-T-1.nd2	49	31.57	15.5211	13.4613
MAX_2022.12.05-CRE-A1-2-P-1.nd2:0001-0512-0549	480.593			MAX_2022.12.05-CRE-A1-2-P-1.nd2	45	51.889	8.67236
MAX_2022.12.05-CRE-A1-2-S-1.nd2:0001-0512-0447	582.307	531.45		MAX_2022.12.05-CRE-A1-2-S-1.nd2	37	57.063	6.48406	7.57821
MAX_2022.12.05-CRE-A1-3.P-1.nd2:0001-0512-0449	479.617			MAX_2022.12.05-CRE-A1-3.P-1.nd2	32	32.211	9.93449
MAX_2022.12.05-CRE-A1-3.S-1.nd2:0001-0465-0512	383.295	431.456		MAX_2022.12.05-CRE-A1-3.S-1.nd2	32	32.432	9.8668	9.90065
MAX_2022.12.05-CRE-A1-4.P-1.nd2:0001-0512-0505	363.384			MAX_2022.12.05-CRE-A1-4.P-1.nd2	40	31.615	12.6522
MAX_2022.12.05-CRE-A1-4.P1-1.nd2:0001-0512-0468	453.37	408.377		MAX_2022.12.05-CRE-A1-4.P1-1.nd2	45	31.343	14.3573	13.5047
MAX_2022.12.05-CRE-A1-5.P-1.nd2:0001-0405-0512	542.613			MAX_2022.12.05-CRE-A1-5.P-1.nd2	36	32.2	11.1801
MAX_2022.12.05-CRE-A1-5.S-1.nd2:0001-0512-0274	499.465			MAX_2022.12.05-CRE-A1-5.S-1.nd2	34	32.452	10.477
MAX_2022.12.05-CRE-A1-5TS-1.nd2:0001-0463-0512	428.592	490.223		MAX_2022.12.05-CRE-A1-5TS-1.nd2	29	33.472	8.66396	10.107
MAX_2022.12.05-CRE-A1-6.P1-1.nd2:0001-0488-0515	549.256			MAX_2022.12.05-CRE-A1-6.P1-1.nd2	42	31.738	13.2333
MAX_2022.12.05-CRE-A1-6.P2-1.nd2:0001-0512-0632	463.69			MAX_2022.12.05-CRE-A1-6.P2-1.nd2	26	31.57	8.23567
MAX_2022.12.05-CRE-A1-6.S-1.nd2:0001-0512-0598	654.075			MAX_2022.12.05-CRE-A1-6.S-1.nd2	33	31.209	10.5739
MAX_2022.12.05-CRE-A1-6.T-1.nd2:0001-0512-0485	493.576	555.674		MAX_2022.12.05-CRE-A1-6.T-1.nd2	30	31.504	9.5226	10.3914
MAX_2022.12.05-CRE-A1-7.P-1.nd2:0001-0512-0488	435.241	435.241		MAX_2022.12.05-CRE-A1-7.P-1.nd2	33	64.741	5.09723	5.09723
MAX_2022.12.05-CRE-A1-9.P1-1.nd2:0001-0512-0434	444.266			MAX_2022.12.05-CRE-A1-9.P1-1.nd2	54	81.276	6.64403
MAX_2022.12.05-CRE-A1-9.S-1.nd2:0001-0512-0777	506.848			MAX_2022.12.05-CRE-A1-9.S-1.nd2	21	32.501	6.46134
MAX_2022.12.05-CRE-A1-9.T-1.nd2:0001-0512-0685	487.207	479.44		MAX_2022.12.05-CRE-A1-9.T-1.nd2	19	31.648	6.00354	6.36964
MAX_2022.12.05-CRE-A1-10.P-1.nd2:0001-0528-0503	751.986			MAX_2022.12.05-CRE-A1-10.P-1.nd2	22	31.532	6.97704
MAX_2022.12.05-CRE-A1-10.S-1.nd2:0001-0467-0512	644.421			MAX_2022.12.05-CRE-A1-10.S-1.nd2	29	31.755	9.13242
MAX_2022.12.05-CRE-A1-10.T-1.nd2:0001-0356-0512	618.598	671.668		MAX_2022.12.05-CRE-A1-10.T-1.nd2	25	34.914	7.16045	7.75664
MAX_2022.12.05-CRE-A1-11.P-1.nd2:0001-0433-0512	645.083			MAX_2022.12.05-CRE-A1-11.P-1.nd2	51	31.825	16.0251
MAX_2022.12.05-CRE-A1-11.S-1.nd2:0001-0275-0512	652.759			MAX_2022.12.05-CRE-A1-11.S-1.nd2	54	33.107	16.3107
MAX_2022.12.05-CRE-A1-11.T-1.nd2:0001-0469-0512	509.156	602.333		MAX_2022.12.05-CRE-A1-11.T-1.nd2	19	31.792	5.97635	12.7707
GFP-2A-Cre + KKK-EEE				GFP-2A-Cre + KKK-EEE
MAX_2022.12.05-CRE-KKK-1-P-1.nd2:0001-0512-0617	376.091			MAX_2022.12.05-CRE-KKK-1-P-1.nd2	18	34.077	5.28216
MAX_2022.12.05-CRE-KKK-1-P1-1.nd2:0001-0406-0512	345.605			MAX_2022.12.05-CRE-KKK-1-P1-1.nd2	35	60.189	5.81502
MAX_2022.12.05-CRE-KKK-1-S-1.nd2:0001-0515-0681	372.016			MAX_2022.12.05-CRE-KKK-1-S-1.nd2	17	31.812	5.3439
MAX_2022.12.05-CRE-KKK-1-T-1.nd2:0001-0512-0212	357.301	362.753		MAX_2022.12.05-CRE-KKK-1-T-1-1.nd2	14	60.957	2.2967	4.68444
MAX_2022.12.05-CRE-KKK-2-P-1.nd2:0001-0506-0512	323.969	323.969		MAX_2022.12.05-CRE-KKK-2-P-1.nd2	15	32.033	4.68267	4.68267
MAX_2022.12.05-CRE-KKK-3-P-1.nd2:0001-0512-0294	363.405			MAX_2022.12.05-CRE-KKK-3-P-1.nd2	14	32.584	4.29659
MAX_2022.12.05-CRE-KKK-3-P1-1.nd2:0001-0593-0512	337.736			MAX_2022.12.05-CRE-KKK-3-P1-1.nd2	19	60.96	3.1168
MAX_2022.12.05-CRE-KKK-3-S-1.nd2:0001-0511-0392	394.9	394.105		MAX_2022.12.05-CRE-KKK-3-S-1.nd2	18	60.742	2.96335
MAX_2022.12.05-CRE-KKK-3-T-1.nd2:0001-0494-0512	480.378			MAX_2022.12.05-CRE-KKK-3-T-1.nd2	26	32.805	7.92562	4.57559
MAX_2022.12.05-CRE-KKK-5-P-1.nd2:0001-0584-0512	369.077			MAX_2022.12.05-CRE-KKK-5-P-1.nd2	24	34.457	6.9652
MAX_2022.12.05-CRE-KKK-5-S-1.nd2:0001-0319-0511	388.009			MAX_2022.12.05-CRE-KKK-5-S-1.nd2	38	56.88	6.68073
MAX_2022.12.05-CRE-KKK-5-S1-1.nd2:0001-0512-0394	378.328			MAX_2022.12.05-CRE-KKK-5-S1-1.nd2	17	32.059	5.30272
MAX_2022.12.05-CRE-KKK-5-T-1.nd2:0001-0512-0476	419.675	388.772		MAX_2022.12.05-CRE-KKK-5-T-1.nd2	15	31.296	4.79294	5.9354
MAX_2022.12.05-CRE-KKK-6-P-1.nd2:0001-0512-0549	620.555			MAX_2022.12.05-CRE-KKK-6-P-1.nd2	10	32.586	3.0688
MAX_2022.12.05-CRE-KKK-7-P-1.nd2:0001-0452-0512	511.005			MAX_2022.12.05-CRE-KKK-7-P-1.nd2	42	31.451	13.3541
MAX_2022.12.05-CRE-KKK-7-S-1.nd2:0001-0497-0512	496.838	503.921		MAX_2022.12.05-CRE-KKK-7-S-1.nd2	49	31.05	15.781	14.5676
MAX_2022.12.05-CRE-KKK-8-P-1.nd2:0001-0476-0512	668.11			MAX_2022.12.05-CRE-KKK-8-P-1.nd2	26	31.402	8.27973
MAX_2022.12.05-CRE-KKK-8-P1-1.nd2:0001-0512-0431	669.51			MAX_2022.12.05-CRE-KKK-8-P1-1.nd2	46	31.504	14.6013
MAX_2022.12.05-CRE-KKK-8-P2-1.nd2:0001-0512-0508	669.395			MAX_2022.12.05-CRE-KKK-8-P2-1.nd2	28	31.536	8.87874
MAX_2022.12.05-CRE-KKK-8-S-1.nd2:0001-0512-0548	674.228	670.311		MAX_2022.12.05-CRE-KKK-8-S-1.nd2	20	32.828	6.09236	9.46304
MAX_2022.12.05-CRE-KKK-9-P-1.nd2:0001-0512-0488	329.498			MAX_2022.12.05-CRE-KKK-9-P-1.nd2	20	34.664	5.76967
MAX_2022.12.05-CRE-KKK-9-S-1.nd2:0001-0361-0512	307.524			MAX_2022.12.05-CRE-KKK-9-S-1.nd2	25	35.762	6.99066
MAX_2022.12.05-CRE-KKK-9-T-1.nd2:0001-0508-0519	257.969	298.33		MAX_2022.12.05-CRE-KKK-9-T-1.nd2	12	31.926	3.75869	5.50634
GFP-2A-Cre + Y343A				GFP-2A-Cre + Y343A
MAX_2022.12.05-CRE-Y343-1-P-1.nd2:0001-0512-0545	494.792			MAX_2022.12.05-CRE-Y343-1-P-1.nd2	20	31.373	6.37491
MAX_2022.12.05-CRE-Y343-1-S-1.nd2:0001-0512-0586	552.986	523.889		MAX_2022.12.05-CRE-Y343-1-S-1.nd2	19	31.854	5.96471	6.16981
MAX_2022.12.05-CRE-Y343-2-P-1.nd2:0001-0512-0681	577.237			MAX_2022.12.05-CRE-Y343-2-P-1.nd2	22	63.046	3.48952
MAX_2022.12.05-CRE-Y343-2-S-1.nd2:0001-0512-0465	516.416			MAX_2022.12.05-CRE-Y343-2-S-1.nd2	24	32.591	7.364
MAX_2022.12.05-CRE-Y343-2-S1-1.nd2:0001-0482-0512	591.99			MAX_2022.12.05-CRE-Y343-2-S1-1.nd2	13	32.161	4.04216
MAX_2022.12.05-CRE-Y343-2-T-1.nd2:0001-0531-0512	429.12	528.691		MAX_2022.12.05-CRE-Y343-2-T-1.nd2	15	32.437	4.62435	4.88001
MAX_2022.12.05-CRE-Y343-3-P-1.nd2:0001-0512-0433	643.268			MAX_2022.12.05-CRE-Y343-3-P-1.nd2	48	65.468	7.33183
MAX_2022.12.05-CRE-Y343-3-P1-1.nd2:0001-0512-0401	417.442			MAX_2022.12.05-CRE-Y343-3-P1-1.nd2	19	32.837	5.78616
MAX_2022.12.05-CRE-Y343-3-S-1.nd2:0001-0512-0517	420.961			MAX_2022.12.05-CRE-Y343-3-S-1.nd2	15	32.88	4.56204
MAX_2022.12.05-CRE-Y343-3-T-1.nd2:0001-0512-0556	312.921	448.648		MAX_2022.12.05-CRE-Y343-3-T-1.nd2	9	33.115	2.7178	5.09946
MAX_2022.12.05-CRE-Y343-4-P-1.nd2:0001-0482-0512	366.238			MAX_2022.12.05-CRE-Y343-4-P-1.nd2	24	31.339	7.65819
MAX_2022.12.05-CRE-Y343-4-P1-1.nd2:0001-0512-0644	467.696	416.967		MAX_2022.12.05-CRE-Y343-4-P1-1.nd2	20	31.01	6.44953	7.05386
MAX_2022.12.05-CRE-Y343-5-P-1.nd2:0003-0512-0397	581.875			MAX_2022.12.05-CRE-Y343-5-P-1.nd2	37	45.059	8.21146
MAX_2022.12.05-CRE-Y343-5-P1-1.nd2:0001-0512-0512	483.421			MAX_2022.12.05-CRE-Y343-5-P1-1.nd2	19	31.246	6.08078
MAX_2022.12.05-CRE-Y343-5-S-1.nd2:0001-0512-0534	525.501			MAX_2022.12.05-CRE-Y343-5-S-1.nd2	20	31.8	6.28931
MAX_2022.12.05-CRE-Y343-5-T-1.nd2:0001-0512-0609	522.495	528.323		MAX_2022.12.05-CRE-Y343-5-T-1.nd2	15	32.631	4.59686	6.2946
GFP + Vector				GFP + Vector
Source	mean intensity			Source	number	length	number of per 10 μm	number of per neuron
MAX_2023.03.07-GFP-1-P-1.nd2:0002-0512-0525	247.864	mean intensity of per neuron		MAX_2023.03.07-GFP-1-P-1.nd2	11	31.296	3.51483
MAX_2023.03.07-GFP-1-P1-1.nd2:0002-0512-0417	322.286			MAX_2023.03.07-GFP-1-P1-1.nd2	36	32.343	11.1307
MAX_2023.03.07-GFP-1-S-1.nd2:0002-0512-0484	303.568	291.239		MAX_2023.03.07-GFP-1-S-1.nd2	12	32.959	3.64089	6.09547
MAX_2023.03.07-GFP-2-F-1.nd2:0002-0512-0560	465.305			MAX_2023.03.07-GFP-2-F-1.nd2	12	31.967	3.75387
MAX_2023.03.07-GFP-2-F1-1.nd2:0002-0512-0432	420.337			MAX_2023.03.07-GFP-2-F1-1.nd2	13	31.565	4.11849
MAX_2023.03.07-GFP-2-P-1.nd2:0002-0512-0644	395.373			MAX_2023.03.07-GFP-2-P-1.nd2	40	57.385	6.97046
MAX_2023.03.07-GFP-2-S-1.nd2:0002-0512-0485	403.004			MAX_2023.03.07-GFP-2-S-1.nd2	11	31.69	3.47113
MAX_2023.03.07-GFP-2-T-1.nd2:0002-0512-0514	528.496	419.82		MAX_2023.03.07-GFP-2-T-1.nd2	9	31.627	2.84567	4.23192
MAX_2023.03.07-GFP-3-P-1.nd2:0002-0512-0509	306.405			MAX_2023.03.07-GFP-3-P-1.nd2	12	31.656	3.79075
MAX_2023.03.07-GFP-3-S-1.nd2:0002-0512-0506	355.211			MAX_2023.03.07-GFP-3-S-1.nd2	6	31.407	1.9104
MAX_2023.03.07-GFP-3-T-1.nd2:0002-0512-0527	402.206	354.607		MAX_2023.03.07-GFP-3-T-1.nd2	15	30.784	4.87266	3.5246
MAX_2023.03.07-GFP-4-P-1.nd2:0002-0512-0482	434.435			MAX_2023.03.07-GFP-4-P-1.nd2	14	31.8	4.40252
MAX_2023.03.07-GFP-4-S-1.nd2:0002-0512-0416	376.167			MAX_2023.03.07-GFP-4-S-1.nd2	14	31.181	4.48991
MAX_2023.03.07-GFP-4-T-1.nd2:0002-0530-0512	388.903	399.835		MAX_2023.03.07-GFP-4-T-1.nd2	8	30.988	2.58164	3.82469
MAX_2023.03.07-GFP-5-F-1.nd2:0002-0502-0512	545.042			MAX_2023.03.07-GFP-5-F-1.nd2	17	31.331	5.42594
MAX_2023.03.07-GFP-5-P-1.nd2:0002-0530-0512	388.869			MAX_2023.03.07-GFP-5-P-1.nd2	15	31.476	4.76554
MAX_2023.03.07-GFP-5-S-1.nd2:0002-0512-0598	612.615			MAX_2023.03.07-GFP-5-S-1.nd2	16	31.172	5.13281
MAX_2023.03.07-GFP-5-T-1.nd2:0002-0512-0408	601.049	536.894		MAX_2023.03.07-GFP-5-T-1.nd2	26	67.612	3.84547	4.79244
MAX_2023.03.07-GFP-6-F-1.nd2:0002-0512-0531	276.291			MAX_2023.03.07-GFP-6-F-1.nd2	12	31.613	3.79591
MAX_2023.03.07-GFP-6-P-1.nd2:0002-0464-0512	482.284			MAX_2023.03.07-GFP-6-P-1.nd2	35	31.083	11.2602
MAX_2023.03.07-GFP-6-S-1.nd2:0002-0350-0512	378.68			MAX_2023.03.07-GFP-6-S-1.nd2	18	35.984	5.00222
MAX_2023.03.07-GFP-6-T-1.nd2:0002-0669-0448	410.476	386.933		MAX_2023.03.07-GFP-6-T-1.nd2	14	37.608	3.72261	5.94523
MAX_2023.03.07-GFP-7-F1-1.nd2:0002-0512-0502	486.146			MAX_2023.03.07-GFP-7-F1-1.nd2	9	47.254	1.9046
MAX_2023.03.07-GFP-7-P-1.nd2:0002-0512-0622	456.303			MAX_2023.03.07-GFP-7-P-1.nd2	26	33.425	7.77861
MAX_2023.03.07-GFP-7-S-1.nd2:0002-0514-0359	262.63			MAX_2023.03.07-GFP-7-S-1.nd2	7	28.276	2.4756
MAX_2023.03.07-GFP-7-S1-1.nd2:0002-0537-0512	522.538			MAX_2023.03.07-GFP-7-S1-1.nd2	30	31.608	9.49127
MAX_2023.03.07-GFP-7-T-1.nd2:0002-0457-0512	618.866			MAX_2023.03.07-GFP-7-T-1.nd2	17	31.326	5.4268
MAX_2023.03.07-GFP-7-T1-1.nd2:0002-0512-0562	611.286	492.962		MAX_2023.03.07-GFP-7-T1-1.nd2	22	31.827	6.91237	5.66487
MAX_2023.03.07-GFP-8-P-1.nd2:0002-0512-0493	404.529			MAX_2023.03.07-GFP-8-P-1.nd2	19	32.119	5.9155
MAX_2023.03.07-GFP-8-S-1.nd2:0002-0473-0512	480.784			MAX_2023.03.07-GFP-8-S-1.nd2	6	31.205	1.92277
MAX_2023.03.07-GFP-8-T-1.nd2:0002-0493-0512	437.992	441.102		MAX_2023.03.07-GFP-8-T-1.nd2	14	32.258	4.34001	4.05943
MAX_2023.03.07-GFP-9-P-1.nd2:0002-0512-0666	476.399			MAX_2023.03.07-GFP-9-P-1.nd2	24	31.664	7.57959
MAX_2023.03.07-GFP-9-P1-1.nd2:0002-0512-0501	433.515			MAX_2023.03.07-GFP-9-P1-1.nd2	28	33.048	8.47252
MAX_2023.03.07-GFP-9-P2-1.nd2:0002-0512-0424	452.292			MAX_2023.03.07-GFP-9-P2-1.nd2	24	41.82	5.73888
MAX_2023.03.07-GFP-9-S-1.nd2:0002-0512-0543	506.036	467.06		MAX_2023.03.07-GFP-9-S-1.nd2	17	31.698	5.36311	6.78853
MAX_2023.03.07-GFP-10-F-1.nd2:0002-0512-0423	427.054			MAX_2023.03.07-GFP-10-F-1.nd2	12	31.26	3.83877
MAX_2023.03.07-GFP-10-P-1.nd2:0002-0512-0418	356.709			MAX_2023.03.07-GFP-10-P-1.nd2	9	31.289	2.87641
MAX_2023.03.07-GFP-10-S-1.nd2:0002-0512-0654	352.393			MAX_2023.03.07-GFP-10-S-1.nd2	22	30.952	7.10778
MAX_2023.03.07-GFP-10-T-1.nd2:0002-0460-0512	390.357	381.628		MAX_2023.03.07-GFP-10-T-1.nd2	12	33.248	3.60924	4.35805
MAX_2023.03.07-GFP-11-P-1.nd2:0002-0547-0504	397.978			MAX_2023.03.07-GFP-11-P-1.nd2	15	31.916	4.69984
MAX_2023.03.07-GFP-11-S-1.nd2:0002-0512-0511	484.936	441.457		MAX_2023.03.07-GFP-11-S-1.nd2	17	32.235	5.27377	4.9868
MAX_2023.03.07-GFP-12-P-1.nd2:0002-0787-0512	538.75			MAX_2023.03.07-GFP-12-P-1.nd2	25	31.734	7.87799
MAX_2023.03.07-GFP-12-P1-1.nd2:0002-0494-0512	489.706			MAX_2023.03.07-GFP-12-P1-1.nd2	37	31.557	11.7248
MAX_2023.03.07-GFP-12-S-1.nd2:0002-0512-0582	441.663			MAX_2023.03.07-GFP-12-S-1.nd2	25	46.721	5.35091
MAX_2023.03.07-GFP-12-T-1.nd2:0002-0431-0607	341.531	452.913		MAX_2023.03.07-GFP-12-T-1.nd2	10	25.062	3.9901	7.23595
MAX_2023.03.07-GFP-13-F-1.nd2:0002-0512-0679	447.482			MAX_2023.03.07-GFP-13-F-1.nd2	11	31.278	3.51685
MAX_2023.03.07-GFP-13-P-1.nd2:0002-0512-0752	419.081			MAX_2023.03.07-GFP-13-P-1.nd2	23	37.525	6.12925
MAX_2023.03.07-GFP-13-S-1.nd2:0002-0512-0628	385.467			MAX_2023.03.07-GFP-13-S-1.nd2	10	32.323	3.09377
MAX_2023.03.07-GFP-13-T-1.nd2:0004-0436-0512	458.972	427.75		MAX_2023.03.07-GFP-13-T-1.nd2	17	31.091	5.46782	4.55192
MAX_2023.03.07-GFP-14-F-1.nd2:0002-0512-0571	335.901			MAX_2023.03.07-GFP-14-F-1.nd2	8	31.608	2.531
MAX_2023.03.07-GFP-14-P-1.nd2:0002-0430-0512	360.388			MAX_2023.03.07-GFP-14-P-1.nd2	27	31.287	8.62978
MAX_2023.03.07-GFP-14-S-1.nd2:0002-0444-0512	424.821	373.703		MAX_2023.03.07-GFP-14-S-1.nd2	17	31.594	5.38077	5.51385
GFP-2A-Cre + Vector				GFP-2A-Cre + Vector
Source	mean intensity	mean intensity of per neuron		Source	number	length	number of per 10 μm	number of per neuron
MAX_2023.03.07-cre-v-1-P-1.nd2:0002-0470-0512	305.618			MAX_2023.03.07-cre-v-1-P-1.nd2	7
MAX_2023.03.07-cre-v-1-P1-1.nd2:0002-0509-0547	368.82			MAX_2023.03.07-cre-v-1-P1-1.nd2	14	32.996	4.24294
MAX_2023.03.07-cre-v-1-S-1.nd2:0002-0488-0510	362.017	345.485		MAX_2023.03.07-cre-v-1-S-1.nd2	12	31.489	3.81085	4.0269
MAX_2023.03.07-cre-v-2-P-1.nd2:0002-0463-0512	311.884			MAX_2023.03.07-cre-v-2-P-1.nd2	4	32.556	1.22865
MAX_2023.03.07-cre-v-2-S-1.nd2:0002-0485-0512	263.044			MAX_2023.03.07-cre-v-2-S-1-1.nd2	4	31.39	1.27429
MAX_2023.03.07-cre-v-2-S1-1.nd2:0002-0502-0512	356.668	310.532		MAX_2023.03.07-cre-v-2-S1-1.nd2	15	32.018	4.68486	2.39594
MAX_2023.03.07-cre-v-3-F-1.nd2:0002-0520-0441	309.106			MAX_2023.03.07-cre-v-3-F-1.nd2	3	25.387	1.18171
MAX_2023.03.07-cre-v-3-P-1.nd2:0002-0512-0556	404.833			MAX_2023.03.07-cre-v-3-P-1.nd2	17	31.104	5.46553
MAX_2023.03.07-cre-v-3-P1-1.nd2:0002-0512-0504	528.761			MAX_2023.03.07-cre-v-3-P1-1.nd2	31	31.495	9.84283
MAX_2023.03.07-cre-v-3-P2-1.nd2:0002-0663-0512	419.894			MAX_2023.03.07-cre-v-3-T-1.nd2	19	60.992	3.11516	4.90131
MAX_2023.03.07-cre-v-3-T-1.nd2:0002-0512-0551	395.141	411.547		MAX_2023.03.07-cre-v-4-P-1.nd2	21	31.075	6.75784
MAX_2023.03.07-cre-v-4-P-1.nd2:0002-0512-0518	420.465			MAX_2023.03.07-cre-v-4-S-1.nd2	14	33.368	4.19564
MAX_2023.03.07-cre-v-4-S-1.nd2:0002-0512-0354	406.253			MAX_2023.03.07-cre-v-4-T-1.nd2	7	32.841	2.13148	4.36165
MAX_2023.03.07-cre-v-4-T-1.nd2:0002-0316-0512	258.44	361.719		MAX_2023.03.07-cre-v-5-P-1.nd2	16	31.654	5.05465
MAX_2023.03.07-cre-v-5-P-1.nd2:0002-0512-0489	337.433			MAX_2023.03.07-cre-v-5-S-1.nd2	17	32.556	5.22177
MAX_2023.03.07-cre-v-5-S-1.nd2:0002-0481-0511	368.672			MAX_2023.03.07-cre-v-5-T-1.nd2	11	32.894	3.34407	4.54017
MAX_2023.03.07-cre-v-5-T-1.nd2:0002-0410-0512	317.771	341.292		MAX_2023.03.07-cre-v-6-P-1.nd2	39	31.524	12.3715
MAX_2023.03.07-cre-v-6-P-1.nd2:0002-0512-0564	520.477			MAX_2023.03.07-cre-v-6-S-1.nd2	17	52.667	3.22783
MAX_2023.03.07-cre-v-6-S-1.nd2:0002-0512-0561	497.107			MAX_2023.03.07-cre-v-6-T-1.nd2	10	33.813	2.95744	6.1856
MAX_2023.03.07-cre-v-6-T-1.nd2:0002-0428-0512	378.893	465.492		MAX_2023.03.07-cre-v-7-P-1.nd2	24	53.299	4.5029
MAX_2023.03.07-cre-v-7-P-1.nd2:0002-0512-0362	441.933			MAX_2023.03.07-cre-v-7-S-1.nd2	8	32.159	2.48764	6.99054
MAX_2023.03.07-cre-v-7-S-1.nd2:0002-0512-0603	318.901	380.417		MAX_2023.03.07-cre-v-8-P-1.nd2	9	33.251	2.70669
MAX_2023.03.07-cre-v-8-P-1.nd2:0002-0524-0512	343.724			MAX_2023.03.07-cre-v-8-S-1.nd2	14	31.004	4.51555
MAX_2023.03.07-cre-v-8-S-1.nd2:0002-0478-0512	439.53			MAX_2023.03.07-cre-v-8-T-1.nd2	19	30.903	6.14827	4.45683
MAX_2023.03.07-cre-v-8-T-1.nd2:0002-0512-0631	400.769	394.674		MAX_2023.03.07-cre-v-9-F-1.nd2	9	32.014	2.81127
MAX_2023.03.07-cre-v-9-F-1.nd2:0002-0436-0512	515.917			MAX_2023.03.07-cre-v-9-P-1.nd2	7	31.355	2.2325
MAX_2023.03.07-cre-v-9-P-1.nd2:0002-0211-0512	381.688			MAX_2023.03.07-cre-v-9-P1-1.nd2	21	31.978	6.56701
MAX_2023.03.07-cre-v-9-P1-1.nd2:0002-0512-0563	475.695			MAX_2023.03.07-cre-v-9-S-1.nd2	8	31.436	2.54485
MAX_2023.03.07-cre-v-9-S-1.nd2:0002-0344-0512	388.885			MAX_2023.03.07-cre-v-9-T-1.nd2	10	32.757	3.05278	3.44168
MAX_2023.03.07-cre-v-9-T-1.nd2:0002-0405-0512	429.853	438.408		MAX_2023.03.07-cre-v-10-A`-1.nd2	13	32.068	4.05389
MAX_2023.03.07-cre-v-10-A`-1.nd2:0002-0680-0512	440.598			MAX_2023.03.07-cre-v-10-P-1.nd2	12	31.967	3.75387
MAX_2023.03.07-cre-v-10-P-1.nd2:0002-0512-0576	365.119			MAX_2023.03.07-cre-v-10-S-1.nd2	7	33.44	2.0933
MAX_2023.03.07-cre-v-10-S-1.nd2:0002-0442-0512	356.313			MAX_2023.03.07-cre-v-10-T1-2-1.nd2	16	32.096	4.98504	3.72153
MAX_2023.03.07-cre-v-10-T1-2-1.nd2:0001-0512-0684	394.437	389.117		MAX_2023.03.07-cre-v-11-F-1.nd2	10	32.992	3.03104
MAX_2023.03.07-cre-v-11-F-1.nd2:0002-0521-0512	326.327			MAX_2023.03.07-cre-v-11-P-1.nd2	9	32.078	2.80566
MAX_2023.03.07-cre-v-11-P-1.nd2:0002-0536-0512	332.519			MAX_2023.03.07-cre-v-11-S-1.nd2	12	56.548	2.12209
MAX_2023.03.07-cre-v-11-S-1.nd2:0002-0512-0705	331.101			MAX_2023.03.07-cre-v-11-T-1.nd2	11	31.733	3.46642	2.8563
MAX_2023.03.07-cre-v-11-T-1.nd2:0002-0512-0701	329.87	329.954
GFP-2A-Cre + EndoA1				GFP-2A-Cre + EndoA1
Source	mean intensity	mean intensity of per neuron		Source	number	length	number of per 10 μm	number of per neuron
MAX_2023.03.07-A1-1-P-1.nd2:0002-0429-0512	373.543			MAX_2023.03.07-A1-1-P-1.nd2			11.7911
MAX_2023.03.07-A1-1-S-1.nd2:0002-0617-0512	401.269			MAX_2023.03.07-A1-1-S-1.nd2	23	31.772	7.23908
MAX_2023.03.07-A1-1-T-1.nd2:0002-0512-0640	372.316	382.376		MAX_2023.03.07-A1-1-T-1.nd2	24	31.243	7.68172	8.90398
MAX_2023.03.07-A1-2-F-1.nd2:0002-0480-0512	326.937			MAX_2023.03.07-A1-2-F-1.nd2	19	31.894	5.95723
MAX_2023.03.07-A1-2-P-1.nd2:0001-0692-0512	538.609			MAX_2023.03.07-A1-2-P-1.nd2	27	31.548	8.55839
MAX_2023.03.07-A1-2-P1-1.nd2:0002-0512-0525	406.126			MAX_2023.03.07-A1-2-P1-1.nd2	30	55.305	5.42446
MAX_2023.03.07-A1-2-S-1.nd2:0002-0512-0689	441.674	428.337		MAX_2023.03.07-A1-2-S-1.nd2	25	31.368	7.96991	6.9775
MAX_2023.03.07-A1-3-F-1.nd2:0002-0512-0733	556.251			MAX_2023.03.07-A1-3-F-1.nd2	21	31.272	6.71527
MAX_2023.03.07-A1-3-P-1.nd2:0002-0620-0512	631.907			MAX_2023.03.07-A1-3-P-1.nd2	25	32.356	7.72654
MAX_2023.03.07-A1-3-S-1.nd2:0002-0454-0512	585.029			MAX_2023.03.07-A1-3-S-1.nd2	14	32.62	4.29185
MAX_2023.03.07-A1-3-S1-1.nd2:0002-0512-0599	522.128			MAX_2023.03.07-A1-3-S1-1.nd2	11	30.734	3.5791
MAX_2023.03.07-A1-3-T-1.nd2:0002-0512-0735	491.623	557.388		MAX_2023.03.07-A1-3-T-1.nd2	10	31.713	3.15328	5.09321
MAX_2023.03.07-A1-4-P-1.nd2:0002-0499-0512	752.799			MAX_2023.03.07-A1-4-P-1.nd2	25	31.87	7.84437
MAX_2023.03.07-A1-4-S-1.nd2:0002-0483-0512	695.233			MAX_2023.03.07-A1-4-S-1.nd2	16	31.431	5.09052
MAX_2023.03.07-A1-4-T-1.nd2:0002-0512-0492	657.361	701.798		MAX_2023.03.07-A1-4-T-1.nd2	22	31.327	7.0227	6.65253
MAX_2023.03.07-A1-5-P-1.nd2:0002-0363-0512	401.474			MAX_2023.03.07-A1-5-P-1.nd2	27	32.913	8.20345
MAX_2023.03.07-A1-6-P-1.nd2:0002-0504-0512	417.059			MAX_2023.03.07-A1-6-P-1.nd2	11	31.157	3.53051
MAX_2023.03.07-A1-6-S-1.nd2:0002-0572-0512	414.097			MAX_2023.03.07-A1-6-S-1.nd2	21	31.99	6.56455
MAX_2023.03.07-A1-6-T-1.nd2:0002-0496-0512	432.946	416.394		MAX_2023.03.07-A1-6-T-1.nd2	10	31.532	3.17138	5.36747
MAX_2023.03.07-A1-7-P-1.nd2:0002-0552-0512	529.354			MAX_2023.03.07-A1-7-P-1.nd2	23	31.513	7.29858
MAX_2023.03.07-A1-7-P1-1.nd2:0002-0512-0459	447.852			MAX_2023.03.07-A1-7-P1-1.nd2	13	31.564	4.11862
MAX_2023.03.07-A1-7-S-1.nd2:0002-0589-0512	585.518			MAX_2023.03.07-A1-7-S-1.nd2	20	31.785	6.29228
MAX_2023.03.07-A1-7-T-1.nd2:0002-0647-0512	517.145	519.967		MAX_2023.03.07-A1-7-T-1.nd2	35	65.104	5.37601	5.77137
MAX_2023.03.07-A1-8-P-1.nd2:0002-0512-0627	413.867			MAX_2023.03.07-A1-8-P-1.nd2	18	31.188	5.77145
MAX_2023.03.07-A1-9-P-1.nd2:0002-0569-0512	406.844			MAX_2023.03.07-A1-9-P-1.nd2	17	31.345	5.42351
MAX_2023.03.07-A1-9-S-1.nd2:0002-0523-0519	504.631			MAX_2023.03.07-A1-9-S-1.nd2	25	51.495	4.85484
MAX_2023.03.07-A1-9-T-1.nd2:0002-0544-0512	414.984	435.082		MAX_2023.03.07-A1-9-T-1.nd2	6	31.095	1.92957	5.77145
MAX_2023.03.07-A1-10-F-1.nd2:0002-0512-0659	393.386			MAX_2023.03.07-A1-10-F-1.nd2	21	31.436	6.68024
MAX_2023.03.07-A1-10-S-1.nd2:0002-0512-0604	427.744			MAX_2023.03.07-A1-10-S-1.nd2	44	46.261	9.51125
MAX_2023.03.07-A1-10-T-1.nd2:0002-0512-0525	400.857	407.329		MAX_2023.03.07-A1-10-T-1.nd2	12	31.202	3.84591	6.67913
MAX_2023.03.07-A1-11-P-1.nd2:0002-0512-0472	612.391			MAX_2023.03.07-A1-11-P-1.nd2	35	33.251	10.526
MAX_2023.03.07-A1-11-S-1.nd2:0002-0512-0449	537.371			MAX_2023.03.07-A1-11-S-1.nd2	21	32.001	6.56229
MAX_2023.03.07-A1-11-T-1.nd2:0002-0512-0436	502.534	550.765		MAX_2023.03.07-A1-11-T-1.nd2	13	31.265	4.158	7.0821
GFP-2A-Cre + KKK-EEE				GFP-2A-Cre + KKK-EEE
MAX_2023.03.07-kkk-1-F1-1.nd2:0002-0512-0625	386.035			MAX_2023.03.07-kkk-1-F1-1.nd2	10	33.132	3.01823
MAX_2023.03.07-kkk-1-p-1.nd2:0002-0312-0512	452.903			MAX_2023.03.07-kkk-1-p-1.nd2	18	37.3	4.82574
MAX_2023.03.07-kkk-1-P1-1.nd2:0002-0356-0512	437.762			MAX_2023.03.07-kkk-1-P1-1.nd2	14	31.467	4.44911
MAX_2023.03.07-kkk-1-S-1.nd2:0002-0501-0512	419.611			MAX_2023.03.07-kkk-1-S-1.nd2	11	31.327	3.51135
MAX_2023.03.07-kkk-1-S1-1.nd2:0002-0512-0683	524.124			MAX_2023.03.07-kkk-1-S1-1.nd2	9	31.054	2.89818
MAX_2023.03.07-kkk-1-S2-1.nd2:0002-0512-0538	558.149			MAX_2023.03.07-kkk-1-S2-1.nd2	18	31.005	5.80552
MAX_2023.03.07-kkk-1-T-1.nd2:0002-0512-0624	526.547			MAX_2023.03.07-kkk-1-T-1.nd2	12	33.79	3.55135
MAX_2023.03.07-kkk-1-T1-1.nd2:0002-0512-0536	494.588	474.965		MAX_2023.03.07-kkk-1-T1-1.nd2	12	48.006	2.49969	3.81989
MAX_2023.03.07-kkk-2-P-1.nd2:0002-0552-0512	273.121			MAX_2023.03.07-kkk-2-P-1.nd2	6	31.508	1.90428
MAX_2023.03.07-kkk-2-P1-1.nd2:0002-0535-0512	226.845	249.983		MAX_2023.03.07-kkk-2-P1-1.nd2	3	31.166	0.962587
MAX_2023.03.07-kkk-3-P-1.nd2:0002-0349-0512	393.58			MAX_2023.03.07-kkk-3-P-1.nd2	13	32.357	4.01768
MAX_2023.03.07-kkk-3-P1-1.nd2:0002-0468-0512	365.989			MAX_2023.03.07-kkk-3-P1-1.nd2	7	33.708	2.07666
MAX_2023.03.07-kkk-3-S-1.nd2:0002-0482-0512	361.474			MAX_2023.03.07-kkk-3-S-1.nd2	11	31.304	3.51393
MAX_2023.03.07-kkk-3-T-1.nd2:0002-0600-0512	345.375	366.604		MAX_2023.03.07-kkk-3-T-1.nd2	3	31.146	0.963206	2.23972
MAX_2023.03.07-kkk-4-P-1.nd2:0002-0490-0512	468.363			MAX_2023.03.07-kkk-4-P-1.nd2	13	31.144	4.17416
MAX_2023.03.07-kkk-4-P1-2-1.nd2:0001-0614-0512	368.907	418.635		MAX_2023.03.07-kkk-4-P1-2-1.nd2	7	32.636	2.14487	3.15951
MAX_2023.03.07-kkk-5-F-2-1.nd2:0002-0251-0512	335.118			MAX_2023.03.07-kkk-5-F-2-1.nd2	12	39.426	3.04368
MAX_2023.03.07-kkk-5-P-1.nd2:0002-0512-0764	267.609			MAX_2023.03.07-kkk-5-P-1.nd2	7	31.237	2.24093
MAX_2023.03.07-kkk-5-P1-1.nd2:0002-0512-0516	266.602			MAX_2023.03.07-kkk-5-P1-1.nd2	8	33.279	2.40392
MAX_2023.03.07-kkk-5-S-1.nd2:0478-0512	984.26			MAX_2023.03.07-kkk-5-S-1.nd2	11	31.213	3.52417
MAX_2023.03.07-kkk-5-T-1.nd2:0002-0500-0512	310.382	432.794		MAX_2023.03.07-kkk-5-T-1.nd2	10	32.819	3.04702	2.85194
MAX_2023.03.07-kkk-6-P-1.nd2:0002-0512-0455	348.45			MAX_2023.03.07-kkk-6-P-1.nd2	11	31.171	3.52892
MAX_2023.03.07-kkk-6-P1-1.nd2:0001-0512-0576	402.699			MAX_2023.03.07-kkk-6-P1-1.nd2	27	31.741	8.50635
MAX_2023.03.07-kkk-6-S-1.nd2:0002-0512-0706	365			MAX_2023.03.07-kkk-6-S-1.nd2	8	31.742	2.52032
MAX_2023.03.07-kkk-6-T-1.nd2:0001-0512-0513	528.268	411.104		MAX_2023.03.07-kkk-6-T-1.nd2	18	31.649	5.68738	5.06074
MAX_2023.03.07-kkk-7-S-1.nd2:0001-0512-0631	385.928			MAX_2023.03.07-kkk-7-S-1.nd2	12	31.62	3.79507
MAX_2023.03.07-kkk-7-T-1.nd2:0002-0512-0641	363.683	374.805		MAX_2023.03.07-kkk-7-T-1.nd2	11	29.813	3.68967	3.74237
GFP-2A-Cre + Y343A				GFP-2A-Cre + Y343A
MAX_2023.03.07-Y343-1-P-1.nd2:0002-0453-0682	342.985			MAX_2023.03.07-Y343-1-P-1.nd2	11	28.888	3.80781
MAX_2023.03.07-Y343-1-S-1.nd2:0002-0443-0512	373.882			MAX_2023.03.07-Y343-1-S-1.nd2	17	30.727	5.53259
MAX_2023.03.07-Y343-1-S1-1.nd2:0002-0703-0512	343.225			MAX_2023.03.07-Y343-1-S1-1.nd2	25	32.155	7.77484
MAX_2023.03.07-Y343-1-T-1.nd2:0002-0434-0512	332.686	348.195		MAX_2023.03.07-Y343-1-T-1-1.nd2	6	31.404	1.91058	4.75646
MAX_2023.03.07-Y343-2-F-1.nd2:0002-0512-0695	363.629			MAX_2023.03.07-Y343-2-F-1.nd2	9	31.731	2.83634
MAX_2023.03.07-Y343-2-P-1.nd2:0002-0508-0512	394.169	378.899		MAX_2023.03.07-Y343-2-P-1.nd2	14	31.278	4.47599	3.65617
MAX_2023.03.07-Y343-3-F-1.nd2:0002-0432-0512	418.164			MAX_2023.03.07-Y343-3-F-1.nd2	14	31.083	4.50407
MAX_2023.03.07-Y343-3-P-1.nd2:0002-0518-0517	396.118			MAX_2023.03.07-Y343-3-P-1.nd2	20	31.503	6.3486
MAX_2023.03.07-Y343-3-P1-1.nd2:0002-0531-0512	284.333			MAX_2023.03.07-Y343-3-P1-1.nd2	6	31.447	1.90797
MAX_2023.03.07-Y343-3-S-1.nd2:0002-0558-0512	467.715			MAX_2023.03.07-Y343-3-S-1.nd2	16	32.243	4.96232
MAX_2023.03.07-Y343-3-T-1.nd2:0002-0547-0512	502.721	413.81		MAX_2023.03.07-Y343-3-T-1.nd2	20	30.533	6.55029	4.85465
MAX_2023.03.07-Y343-4-P-1.nd2:0002-0513-0512	340.934			MAX_2023.03.07-Y343-4-P-1.nd2	16	31.771	5.03604
MAX_2023.03.07-Y343-4-S-1.nd2:0002-0573-0512	276.312	308.623		MAX_2023.03.07-Y343-4-S-1.nd2	15	40.093	3.7413	4.38867
MAX_2023.03.07-Y343-5-F-1.nd2:0002-0546-0512	347.521			MAX_2023.03.07-Y343-5-F-1.nd2	13	37.029	3.51076
MAX_2023.03.07-Y343-5-P-1.nd2:0002-0575-0512	254.245			MAX_2023.03.07-Y343-5-P-1.nd2	13	32.054	4.05566
MAX_2023.03.07-Y343-5-P1-1.nd2:0002-0512-0708	378.113			MAX_2023.03.07-Y343-5-P1-1.nd2	15	31.558	4.75315
MAX_2023.03.07-Y343-5-S-1.nd2:0002-0512-0564	434.17			MAX_2023.03.07-Y343-5-S-1.nd2	11	27.917	3.94025
MAX_2023.03.07-Y343-5-T-1.nd2:0002-0512-0709	358.647	354.539		MAX_2023.03.07-Y343-5-T-1.nd2	11	31.654	3.47507	3.94698
MAX_2023.03.07-Y343-6-P-1.nd2:0002-0512-0586	294.427	294.427		MAX_2023.03.07-Y343-6-P-1.nd2	7	31.331	2.23421
MAX_2023.03.07-Y343-7-F-1.nd2:0002-0512-0596	342.67			MAX_2023.03.07-Y343-7-F-1.nd2	9	31.899	2.82141
MAX_2023.03.07-Y343-7-P-1.nd2:0002-0499-0512	342.776			MAX_2023.03.07-Y343-7-P-1.nd2	18	30.973	5.81151
MAX_2023.03.07-Y343-7-S-1.nd2:0002-0512-0611	409.325			MAX_2023.03.07-Y343-7-S-1.nd2	11	31.281	3.51651
MAX_2023.03.07-Y343-7-T-1.nd2:0002-0464-0512	364.003	364.693		MAX_2023.03.07-Y343-7-T-1.nd2	10	31.662	3.15836	3.5084
MAX_2023.03.07-Y343-8-P-1.nd2:0002-0512-0546	322.937			MAX_2023.03.07-Y343-8-P-1.nd2	16	31.746	5.04001
MAX_2023.03.07-Y343-8-P1-1.nd2:0002-0647-0509	302.174			MAX_2023.03.07-Y343-8-P1-1.nd2	20	31.755	6.29822
MAX_2023.03.07-Y343-8-S-1.nd2:0002-0416-0512	342.296			MAX_2023.03.07-Y343-8-S-1.nd2	24
MAX_2023.03.07-Y343-8-T-1.nd2:0002-0462-0512	337.988	326.349		MAX_2023.03.07-Y343-8-T-1.nd2	14	31.166	4.49207	5.27677
MAX_2023.03.07-Y343-9-F-1.nd2:0002-0600-0512	295.157			MAX_2023.03.07-Y343-9-F-1.nd2	4	36.748	1.08849
MAX_2023.03.07-Y343-9-P1-1.nd2:0002-0529-0512	341.886			MAX_2023.03.07-Y343-9-P1-1.nd2	15	32.006	4.68662
MAX_2023.03.07-Y343-9-S-1.nd2:0002-0635-0512	395.584			MAX_2023.03.07-Y343-9-S-1.nd2	18	60.462	2.97708
MAX_2023.03.07-Y343-9-T-1.nd2:0002-0366-0512	319.738	338.091		MAX_2023.03.07-Y343-9-T-1.nd2	6	31.822	1.88549	2.65942
GFP + Vector				GFP + Vector
Source	mean intensity	mean intensity of per neuron		Source	number	length	number of per 10 μm	number of per neuron
MAX_5-S-1.nd2:0002-0523-0512	471.407			MAX_5-S-1.nd2	10	31.047	3.22092
MAX_5-P-1.nd2:0002-0512-0533	382.565	426.986		MAX_5-P-1.nd2	10	31.771	3.14752	3.18422
MAX_4-T-1.nd2:0002-0508-0512	337.288			MAX_4-T-1.nd2	16	37.106	4.31197
MAX_4-S-1.nd2:0002-0546-0512	347.925			MAX_4-S-1.nd2	22	30.861	7.12874
MAX_4-P-1.nd2:0002-0717-0512	406.508			MAX_4-P-1.nd2	33	31.117	10.6051
MAX_4-F-1.nd2:0002-0547-0512	442.486	383.552		MAX_4-F-1.nd2	20	32.124	6.22587	7.06793
MAX_3-T-1.nd2:0002-0512-0480	434.036			MAX_3-T-1.nd2	29	62.244	4.65908
MAX_3-P-1.nd2:0002-0512-0464	364.067			MAX_3-P-1.nd2	30	62.928	4.76735
MAX_3-F-1.nd2:0002-0512-0605	422.797	406.967		MAX_3-F-1.nd2	21	34.277	6.12656	5.18433
MAX_2-S-1.nd2:0002-0534-0512	438.676			MAX_2-S-1.nd2	7	32.803	2.13395
MAX_2-P-1.nd2:0001-0633-0511	464.366	451.521		MAX_2-P-1.nd2	19	31.659	6.00145	4.0677
MAX_1-S-1.nd2:0002-0481-0512	446.573			MAX_1-S-1.nd2	11	30.673	3.58622
MAX_1-P-1.nd2:0002-0512-0541	446.051	446.312		MAX_1-P-1.nd2	14	30.989	4.51773	4.05197
GFP-2A-Cre + Vector				GFP-2A-Cre + Vector
Source	mean intensity	mean intensity of per neuron		Source	number	length	number of per 10 μm	number of per neuron
MAX_11-T-1.nd2:0002-0515-0512	286.373			MAX_11-T-1.nd2	9	31.204	2.88425
MAX_11-S-1.nd2:0002-0603-0512	383.265			MAX_11-S-1.nd2	11	31.786	3.46064
MAX_11-P-1.nd2:0002-0591-0512	293.285	320.974		MAX_11-P-1.nd2	9	31.632	2.84522	3.06337
MAX_10-T-1.nd2:0002-0512-0494	388.153			MAX_10-T-1.nd2	5	32.169	1.55429
MAX_10-S-1.nd2:0002-0438-0507	311.046			MAX_10-S-1.nd2	10	30.764	3.25055
MAX_10-P-1.nd2:0002-0649-0512	308.925			MAX_10-P-1.nd2	9	30.835	2.91876
MAX_10-F-1.nd2:0002-0512-0482	336.622	336.187		MAX_10-F-1.nd2	6	31.054	1.93212	2.41393
MAX_9-T-1.nd2:0002-0426-0512	343.44			MAX_9-T-1.nd2	1	30.799	0.324686
MAX_9-S-1.nd2:0002-0540-0512	262.739			MAX_9-S-1.nd2	2	31.207	0.640882
MAX_9-P-1.nd2:0002-0502-0512	270.907	292.362		MAX_9-P-1.nd2	4	31.181	1.28283	0.749467
MAX_7-T-1.nd2:0002-0512-0562	237.969			MAX_7-T-1.nd2	2	31.103	0.643025
MAX_7-S-1.nd2:0002-0512-0456	335.146			MAX_7-S-1.nd2	7	32.457	2.1567
MAX_7-P-1.nd2:0002-0512-0498	298.427	290.514		MAX_7-P-1.nd2	5	31.156	1.60483	1.46818
MAX_6-T-1.nd2:0002-0512-0519	332.397			MAX_6-T-1.nd2	4	38.885	1.02867
MAX_6-S-1.nd2:0002-0512-0714	315.597			MAX_6-S-1.nd2	3	31.2	0.961538
MAX_6-P-1.nd2:0002-0512-0527	330.628	326.207		MAX_6-P-1.nd2	6	30.837	1.94571	1.31198
MAX_5-T-1.nd2:0002-0512-0509	293.574			MAX_5-T-1.nd2	4	31.375	1.2749
MAX_5-F-1.nd2:0002-0495-0512	358.109			MAX_5-S-1.nd2	7	30.657	2.28333
MAX_5-S-1.nd2:0002-0675-0512	338.399			MAX_5-P-1.nd2	8	31.789	2.51659
MAX_5-P-1.nd2:0002-0512-0523	359.465	337.387		MAX_4-P-1.nd2	7	31.218	2.2423	2.07928
MAX_4-P-1.nd2:0002-0512-0543	318.045	318.045		MAX_3-S-1.nd2	7	30.654	2.28355	2.28355
MAX_3-S-1.nd2:0002-0524-0512	377.217			MAX_3-T-1.nd2	7	30.888	2.26625
MAX_3-T-1.nd2:0002-0512-0465	383.841			MAX_5-F-1.nd2	5	32.61	1.53327
MAX_3-F-1.nd2:0002-0507-0512	301.679	354.246		MAX_3-F-1.nd2	6	31.708	1.89227	1.89726
MAX_1-p-1.nd2:0002-0512-0432	469.332	469.332		MAX_1-p-1.nd2	8	31.337	2.55289	2.55289
MAX_2-S-1.nd2:0002-0505-0512	316.827	316.827		MAX_2-S-1.nd2	7	63.905	1.09538	1.09538
GFP-2A-Cre + EndoA1				GFP-2A-Cre + EndoA1
Source	mean intensity	mean intensity of per neuron		Source	number	length	number of per 10 μm	number of per neuron
MAX_5-S-1.nd2	578.107			MAX_5-S-1.nd2	20	31.95	6.25978
MAX_5-P-1.nd2	513.044	545.576		MAX_5-P-1.nd2	20	31.049	6.44143	6.35061
MAX_5-T-1.nd2	234.171			MAX_5-T-1.nd2	23	30.12	7.63612
MAX_4-S-1.nd2	634.171	434.171		MAX_4-S-1.nd2	25	31.85	7.84929	7.74271
MAX_3-T-1.nd2	481.154			MAX_3-T-1.nd2	15	31.637	4.74128
MAX_3-S-1.nd2	440.616			MAX_3-S-1.nd2	25	31.513	7.93323
MAX_3-P-1.nd2	471.985	464.585		MAX_3-P-1.nd2	20	31.389	6.37166	6.34873
MAX_1-T-1.nd2	581.288			MAX_1-T-1.nd2	29	31.924	9.08407
MAX_1-S-1.nd2	511.176			MAX_1-S-1.nd2	25	32.186	7.76735
MAX_1-P-1.nd2	576.191	556.218		MAX_1-P-1.nd2	17	33.485	5.0769	7.30944
GFP + Vector				GFP + Vector
MAX_4-S-1.nd2:0002-0512-0556	746.681			MAX_4-S-1.nd2	22	32.663	6.73545
MAX_4-P-1.nd2:0002-0512-0582	668.174	707.428		MAX_4-P-1.nd2	37	38.499	9.61064	8.17304
MAX_3-T-1.nd2:0002-0512-0646	566.352			MAX_3-T-1.nd2	31	31.484	9.84627
MAX_3-S-1.nd2:0002-0512-0756	606.849			MAX_3-S-1.nd2	32	38.259	8.36405
MAX_3-P-1.nd2:0002-0512-0671	575.526			MAX_3-P-1.nd2	48	32.028	14.9869
MAX_3-F-1.nd2:0002-0512-0724	450.777	549.876		MAX_3-F-1.nd2	10	31.768	3.14782	9.08626
MAX_2-T-1.nd2:0002-0545-0388	556.21			MAX_2-T-1.nd2	25	49.828	5.01726
MAX_2-S-1.nd2:0002-0512-0530	1067.72			MAX_2-S-1.nd2	27	31.445	8.58642
MAX_2-P-1.nd2:0002-0512-0576	1193.63			MAX_2-P-1.nd2	43	30.367	14.1601
MAX_2-F-1.nd2:0002-0512-0593	876.821	923.594		MAX_2-F-1.nd2	24	31.532	7.61132	8.84378
MAX_1-T-1.nd2:0002-0662-0512	570.976			MAX_1-T-1.nd2	15	30.997	4.83918
MAX_1-S-1.nd2:0002-0547-0512	668.518			MAX_1-S-1.nd2	32	31.213	10.2521
MAX_1-p-1.nd2:0002-0562-0430	604.099	614.531		MAX_1-p-1.nd2	25	32.546	7.68144	7.59092
GFP-2A-Cre + KKK-EEE				GFP-2A-Cre + KKK-EEE
MAX_8-P--1.nd2:0002-0488-0512	493.109	493.109		MAX_8-P--1.nd2	23	31.868	7.21727	7.21727
MAX_7-T--1.nd2:0002-0445-0512	399.218			MAX_7-T--1.nd2	19	31.486	6.03443
MAX_7-S--1.nd2:0002-0530-0512	447.73			MAX_7-S--1.nd2	21	30.648	6.852
MAX_7-P--1.nd2:0002-0458-0512	483.246	443.398		MAX_7-P--1.nd2	27	30.833	8.75685	7.21443
MAX_6-T--1.nd2:0002-0473-0512	246.034			MAX_6-T--1.nd2	10	30.172	3.31433
MAX_6-S--1.nd2:0002-0553-0512	336.776			MAX_6-S--1.nd2	13	31.225	4.16333
MAX_6-P--1.nd2:0002-0586-0512	383.821	322.21		MAX_6-P--1.nd2	20	31.294	6.391	4.62289
MAX_5-T--1.nd2:0002-0392-0512	381.481			MAX_5-T--1.nd2	13	31.273	4.15694
MAX_5-S--1.nd2:0002-0409-0512	297.33			MAX_5-S--1.nd2	4	31.118	1.28543
MAX_5-P--1.nd2:0002-0512-0515	302.618			MAX_5-P--1.nd2	5	30.973	1.61431
MAX_5-F--1.nd2:0002-0505-0512	466.442	361.968		MAX_5-F--1.nd2	12	32.717	3.66782	2.68112
MAX_4-T--1.nd2:0002-0600-0512	562.482			MAX_4-T--1.nd2	27	31.407	8.59681
MAX_4-S1--1.nd2:0002-0512-0611	571.83			MAX_4-S--1.nd2	18	31.461	5.72137
MAX_4-S--1.nd2:0002-0654-0512	675.375			MAX_4-P--1.nd2	19	30.166	6.29848
MAX_4-P--1.nd2:0002-0541-0512	647.713			MAX_4-F--1.nd2	14	39.683	3.52796	6.03615
MAX_4-F--1.nd2:0002-0498-0512	625.55	616.59		MAX_3-T--1.nd2	11	31.137	3.53277
MAX_3-T--1.nd2:0002-0533-0512	504.627			MAX_3-S--1.nd2	11	30.059	3.65947
MAX_3-S--1.nd2:0002-0442-0512	427.957			MAX_3-P--1.nd2	12	34.166	3.51226
MAX_3-P--1.nd2:0002-0419-0512	319.819			MAX_3-F--1.nd2	10	33.214	3.01078	3.42882
MAX_3-F--1.nd2:0002-0367-0512	516.823	442.307		MAX_2-T--1.nd2	12	31.575	3.80048
MAX_2-T--1.nd2:0002-0512-0618	573.896			MAX_2-S--1.nd2	13	31.491	4.12816
MAX_2-S--1.nd2:0002-0595-0512	655.348			MAX_2-P--1.nd2	28	31.878	8.78349
MAX_2-P--1.nd2:0002-0512-0569	609.461			MAX_2-F--1.nd2	18	31.085	5.79057	5.62567
MAX_2-F--1.nd2:0002-0383-0512	683.661	630.591		MAX_1-T-1.nd2	13	32.384	4.01433
MAX_1-T-1.nd2:0002-0528-0512	544.382			MAX_1-S-1.nd2	31	36.488	8.49594
MAX_1-S-1.nd2:0002-0512-0563	518.791			MAX_1-P--1.nd2	19	30.946	6.13973
MAX_1-P--1.nd2:0002-0496-0512	601.667			MAX_1-F-1.nd2	21	32.283	6.50497	6.28874
MAX_1-F-1.nd2:0002-0475-0512	615.376	570.054
GFP + Vector				GFP + Vector
MAX_5-S-1.nd2:0002-0523-0512	471.407			MAX_5-S-1.nd2	10	31.047	3.22092
MAX_5-P-1.nd2:0002-0512-0533	382.565	426.986		MAX_5-P-1.nd2	10	31.771	3.14752	3.18422
MAX_4-T-1.nd2:0002-0508-0512	337.288			MAX_4-T-1.nd2	16	37.106	4.31197
MAX_4-S-1.nd2:0002-0546-0512	347.925			MAX_4-S-1.nd2	22	30.861	7.12874
MAX_4-P-1.nd2:0002-0717-0512	406.508			MAX_4-P-1.nd2	33	31.117	10.6051
MAX_4-F-1.nd2:0002-0547-0512	442.486	383.552		MAX_4-F-1.nd2	20	32.124	6.22587	7.06793
MAX_3-T-1.nd2:0002-0512-0480	434.036			MAX_3-T-1.nd2	29	62.244	4.65908
MAX_3-P-1.nd2:0002-0512-0464	364.067			MAX_3-P-1.nd2	30	62.928	4.76735
MAX_3-F-1.nd2:0002-0512-0605	422.797	406.967		MAX_3-F-1.nd2	21	34.277	6.12656	5.18433
MAX_2-S-1.nd2:0002-0534-0512	438.676			MAX_2-S-1.nd2	7	32.803	2.13395
MAX_2-P-1.nd2:0001-0633-0511	464.366	451.521		MAX_2-P-1.nd2	19	31.659	6.00145	4.0677
MAX_1-S-1.nd2:0002-0481-0512	446.573			MAX_1-S-1.nd2	11	30.673	3.58622
MAX_1-P-1.nd2:0002-0512-0541	446.051	446.312		MAX_1-P-1.nd2	14	30.989	4.51773	4.05197
GFP + Vector				GFP + Vector
Source	MeanGreen			Source
20200830-S1-GPN-WT-V-1-100-4Z-S3-MaxIP	223.68			20200830-S1-GPN-WT-V-1-100-4Z-S3-MaxIP	16	61	2.62295
20200830-S1-GPN-WT-V-1-100-4Z-P-MaxIP	304.77			20200830-S1-GPN-WT-V-1-100-4Z-P-MaxIP	17	54.26	3.13306
20200830-S1-GPN-WT-V-1-100-4Z-S-MaxIP	220.88			20200830-S1-GPN-WT-V-1-100-4Z-S-MaxIP	14	32.61	4.29316
20200830-S1-GPN-WT-V-1-100-4Z-S1.ics	226.66	243.998		20200830-S1-GPN-WT-V-1-100-4Z-S1.ics	13	30.64	4.24282	3.573
20200830-S1-GPN-WT-V-3-100-4Z-P-MaxIP	708.17			20200830-S1-GPN-WT-V-3-100-4Z-P-MaxIP	10	28.99	3.44947
20200830-S1-GPN-WT-V-3-100-4Z-P4-MaxIP	567.33			20200830-S1-GPN-WT-V-3-100-4Z-P4-MaxIP	27	64.94	4.15768
20200830-S1-GPN-WT-V-3-100-4Z-S-MaxIP	342.92			20200830-S1-GPN-WT-V-3-100-4Z-S-MaxIP	6	26.43	2.27015
20200830-S1-GPN-WT-V-3-100-4Z-S2-MaxIP	665.23			20200830-S1-GPN-WT-V-3-100-4Z-S2-MaxIP	22	31.73	6.9335
20200830-S1-GPN-WT-V-3-100-4Z-S2-MaxIP	602.3			20200830-S1-GPN-WT-V-3-100-4Z-S2-MaxIP	17	31.68	5.36616
20200830-S1-GPN-WT-V-3-100-4Z-T-MaxIP	1055.46	656.902		20200830-S1-GPN-WT-V-3-100-4Z-T-MaxIP	15	31.05	4.83092	4.50131
20200830-S1-GPN-WT-V-4-100-4Z-P-MaxIP	458.95			20200830-S1-GPN-WT-V-4-100-4Z-P-MaxIP	8	36.9	2.16802
20200830-S1-GPN-WT-V-4-100-4Z-P1-MaxIP	491	474.975		20200830-S1-GPN-WT-V-4-100-4Z-P1-MaxIP	33	68.3	4.83163	3.49982
20200830-S1-GPN-WT-V-5-100-4Z-S-MaxIP	286.93			20200830-S1-GPN-WT-V-5-100-4Z-S-MaxIP	20	38.51	5.19346
20200830-S1-GPN-WT-V-5-100-4Z-P-MaxIP	360.67			20200830-S1-GPN-WT-V-5-100-4Z-P-MaxIP	48	91.77	5.23047
20200830-S1-GPN-WT-V-5-100-4Z-P1-MaxIP	362.46			20200830-S1-GPN-WT-V-5-100-4Z-P1-MaxIP	17	49.67	3.42259
20200830-S1-GPN-WT-V-5-100-4Z-P3-MaxIP	293.41			20200830-S1-GPN-WT-V-5-100-4Z-P3-MaxIP	14	30.41	4.60375
20200830-S1-GPN-WT-V-6-100-4Z-P1-MaxIP	442.57			20200830-S1-GPN-WT-V-6-100-4Z-P1-MaxIP	16	32.5	4.92308
20200830-S1-GPN-WT-V-5-100-4Z-S1-MaxIP	316.97			20200830-S1-GPN-WT-V-5-100-4Z-S1-MaxIP	58	49.95	11.6116
20200830-S1-GPN-WT-V-5-100-4Z-S2-MaxIP	847.37	415.769		20200830-S1-GPN-WT-V-5-100-4Z-S2-MaxIP	21	41.81	5.02272	5.71538
20200830-S1-GPN-WT-V-6-100-4Z-P-MaxIP	377.79			20200830-S1-GPN-WT-V-6-100-4Z-P-MaxIP	8	42.27	1.8926
20200830-S1-GPN-WT-V-6-100-4Z-P2-MaxIP	522.26			20200830-S1-GPN-WT-V-6-100-4Z-P2-MaxIP	30	81.07	3.70051
20200830-S1-GPN-WT-V-6-100-4Z-P3-MaxIP	544.24			20200830-S1-GPN-WT-V-6-100-4Z-P3-MaxIP	23	49.8	4.61847
20200830-S1-GPN-WT-V-6-100-4Z-P4.ics	400.25	461.135		20200830-S1-GPN-WT-V-6-100-4Z-P4.ics	23	71.71	3.20736	3.35473
20200830-S1-GPN-WT-V-7-100-4Z-F-MaxIP	297.52			20200830-S1-GPN-WT-V-7-100-4Z-F-MaxIP	19	66.32	2.8649
20200830-S1-GPN-WT-V-7-100-4Z-S-MaxIP	291.81			20200830-S1-GPN-WT-V-7-100-4Z-S-MaxIP	4	31.1	1.28617
20200830-S1-GPN-WT-V-7-100-4Z-P-MaxIP	450.32			20200830-S1-GPN-WT-V-7-100-4Z-P-MaxIP	7	30.17	2.32019
20200830-S1-GPN-WT-V-7-100-4Z-P1-MaxIP	643.6			20200830-S1-GPN-WT-V-7-100-4Z-P1-MaxIP	21	34.23	6.13497
20200830-S1-GPN-WT-V-7-100-4Z-P2-MaxIP	412.28			20200830-S1-GPN-WT-V-7-100-4Z-P2-MaxIP	14	55.3	2.53165
20200830-S1-GPN-WT-V-7-100-4Z-P3-MaxIP	413.01	418.09		20200830-S1-GPN-WT-V-7-100-4Z-P3-MaxIP	12	60.97	1.96818	2.85101
20200830-S1-GPN-WT-V-8-100-4Z-P-MaxIP	488.48			20200830-S1-GPN-WT-V-8-100-4Z-P-MaxIP	10	44.3	2.25734
20200830-S1-GPN-WT-V-8-100-4Z-P1-MaxIP	524.68	506.58		20200830-S1-GPN-WT-V-8-100-4Z-P1-MaxIP	15	43.68	3.43407	2.8457
20200830-S1-GPN-WT-V-9-100-4Z-S-MaxIP	423.9			20200830-S1-GPN-WT-V-9-100-4Z-S-MaxIP	7	28.97	2.41629
20200830-S1-GPN-WT-V-9-100-4Z-P-MaxIP	458.05			20200830-S1-GPN-WT-V-9-100-4Z-P-MaxIP	19	49.23	3.85944
20200830-S1-GPN-WT-V-9-100-4Z-P1-MaxIP	357.37			20200830-S1-GPN-WT-V-9-100-4Z-P1-MaxIP	5	39.43	1.26807
20200830-S1-GPN-WT-V-9-100-4Z-P4-MaxIP	390.73			20200830-S1-GPN-WT-V-9-100-4Z-P4-MaxIP	9	31.12	2.89203
20200830-S1-GPN-WT-V-9-100-4Z-S-MaxIP	412.19	408.448		20200830-S1-GPN-WT-V-9-100-4Z-S-MaxIP	5	27.85	1.79533	2.44623
GFP-2A-Cre + Vector				GFP-2A-Cre + Vector
20200830-S2-GPN-KO-V-1-100-4Z-P-MaxIP	458.59			20200830-S2-GPN-KO-V-1-100-4Z-P-MaxIP	12	33.17	3.61773
20200830-S2-GPN-KO-V-1-100-4Z-P1-MaxIP	289.04			20200830-S2-GPN-KO-V-1-100-4Z-P1-MaxIP	22	45.27	4.85973
20200830-S2-GPN-KO-V-1-100-4Z-P2-MaxIP	340.49	362.707		20200830-S2-GPN-KO-V-1-100-4Z-P2-MaxIP	10	31.7	3.15457	3.87734
20200830-S2-GPN-KO-V-2-100-4Z-P-MaxIP	441.73			20200830-S2-GPN-KO-V-2-100-4Z-P-MaxIP	21	31.58	6.64978
20200830-S2-GPN-KO-V-2-100-4Z-P1-MaxIP	366.31			20200830-S2-GPN-KO-V-2-100-4Z-P1-MaxIP	20	31.9	6.26959
20200830-S2-GPN-KO-V-2-100-4Z-S-MaxIP	297.56	368.533		20200830-S2-GPN-KO-V-2-100-4Z-S-MaxIP	27	50	5.4	6.10646
20200830-S2-GPN-KO-V-3-100-4Z-F-MaxIP	253.29			20200830-S2-GPN-KO-V-3-100-4Z-F-MaxIP	15	32.56	4.60688
20200830-S2-GPN-KO-V-3-100-4Z-P-MaxIP	402.16			20200830-S2-GPN-KO-V-3-100-4Z-P-MaxIP	23	47.84	4.80769
20200830-S2-GPN-KO-V-3-100-4Z-S1-MaxIP	231.29			20200830-S2-GPN-KO-V-3-100-4Z-S1-MaxIP	7
20200830-S2-GPN-KO-V-3-100-4Z-P1-MaxIP	305.32			20200830-S2-GPN-KO-V-3-100-4Z-P1-MaxIP	15	51.86	2.8924
20200830-S2-GPN-KO-V-3-100-4Z-P2-MaxIP	444.56			20200830-S2-GPN-KO-V-3-100-4Z-P2-MaxIP	17	43.86	3.87597
20200830-S2-GPN-KO-V-3-100-4Z-P3-MaxIP	287.22			20200830-S2-GPN-KO-V-3-100-4Z-P3-MaxIP	20	45	4.44444
20200830-S2-GPN-KO-V-3-100-4Z-S-MaxIP	341.74			20200830-S2-GPN-KO-V-3-100-4Z-S-MaxIP	13	38.41	3.38454
20200830-S2-GPN-KO-V-3-100-4Z-S1-MaxIP	274.18	317.47		20200830-S2-GPN-KO-V-3-100-4Z-S1-MaxIP	13	71.78	1.81109	3.689
20200830-S2-GPN-KO-V-4-100-4Z-P-MaxIP	265.61			20200830-S2-GPN-KO-V-4-100-4Z-P-MaxIP	7	31.26	2.23928
20200830-S2-GPN-KO-V-4-100-4Z-P3-MaxIP	254.28			20200830-S2-GPN-KO-V-4-100-4Z-P3-MaxIP	5	35.3	1.41643
20200830-S2-GPN-KO-V-4-100-4Z-T-MaxIP	317.33			20200830-S2-GPN-KO-V-4-100-4Z-T-MaxIP	7	32.01	2.18682
20200830-S2-GPN-KO-V-4-100-4Z-P1-MaxIP	196.55			20200830-S2-GPN-KO-V-4-100-4Z-P1-MaxIP	7	34.44	2.03252
20200830-S2-GPN-KO-V-4-100-4Z-P3-MaxIP	246.92			20200830-S2-GPN-KO-V-4-100-4Z-P3-MaxIP	8	36.05	2.21914
20200830-S2-GPN-KO-V-4-100-4Z-S-MaxIP	233.47	252.36		20200830-S2-GPN-KO-V-4-100-4Z-S-MaxIP	5	35.5	1.40845	1.91711
20200830-S2-GPN-KO-V-5-100-4Z-P-MaxIP	331.37			20200830-S2-GPN-KO-V-5-100-4Z-P-MaxIP	10	38.51	2.59673
20200830-S2-GPN-KO-V-5-100-4Z-P1-MaxIP	370.52	350.945		20200830-S2-GPN-KO-V-5-100-4Z-P1-MaxIP	16	32.42	4.93523	3.76598
20200830-S2-GPN-KO-V-6-100-4Z-P-MaxIP	467.18			20200830-S2-GPN-KO-V-6-100-4Z-P-MaxIP	19	50.71	3.7468
20200830-S2-GPN-KO-V-6-100-4Z-P2-MaxIP	420.06			20200830-S2-GPN-KO-V-6-100-4Z-P2-MaxIP	14	81.39	1.72011
20200830-S2-GPN-KO-V-6-100-4Z-S-MaxIP	244.09			20200830-S2-GPN-KO-V-6-100-4Z-S-MaxIP	3	31.79	0.943693
20200830-S2-GPN-KO-V-6-100-4Z-T2-MaxIP	210.49			20200830-S2-GPN-KO-V-6-100-4Z-T2-MaxIP	2	32.64	0.612745
20200830-S2-GPN-KO-V-6-100-4Z-S1-MaxIP	356.69			20200830-S2-GPN-KO-V-6-100-4Z-S1-MaxIP	6	31.48	1.90597
20200830-S2-GPN-KO-V-6-100-4Z-S2-MaxIP	287.11			20200830-S2-GPN-KO-V-6-100-4Z-S2-MaxIP	4	35.84	1.11607
20200830-S2-GPN-KO-V-6-100-4Z-S3-MaxIP	234.72			20200830-S2-GPN-KO-V-6-100-4Z-S3-MaxIP	8	31.38	2.54939
20200830-S2-GPN-KO-V-6-100-4Z-T1-MaxIP	112.22	291.57		20200830-S2-GPN-KO-V-6-100-4Z-T1-MaxIP	1	33.08	0.302297	1.61214
20200830-S2-GPN-KO-V-7-100-4Z-P-MaxIP	348.17			20200830-S2-GPN-KO-V-7-100-4Z-P-MaxIP	13	31.38	4.14277
20200830-S2-GPN-KO-V-7-100-4Z-P1-MaxIP	336.22			20200830-S2-GPN-KO-V-7-100-4Z-P1-MaxIP	8	54.74	1.46145
20200830-S2-GPN-KO-V-7-100-4Z-S-MaxIP	150.63	243.425		20200830-S2-GPN-KO-V-7-100-4Z-S-MaxIP	7	31.75	2.20472	2.80211
GFP-2A-Cre + EndoA1				GFP-2A-Cre + EndoA1
20200830-S2-GPN-KO-A1-1-100-4Z-P-MaxIP	528.86			20200830-S2-GPN-KO-A1-1-100-4Z-P-MaxIP	7	31.82	2.19987
20200830-S2-GPN-KO-A1-1-100-4Z-P1-MaxIP	437.87	483.365		20200830-S2-GPN-KO-A1-1-100-4Z-P1-MaxIP	17	32.6	5.21472	3.7073
20200830-S2-GPN-KO-A1-2-100-4Z-P-MaxIP	404.43			20200830-S2-GPN-KO-A1-2-100-4Z-P-MaxIP	27	66.52	4.05893
20200830-S2-GPN-KO-A1-2-100-4Z-P2-MaxIP	402.19			20200830-S2-GPN-KO-A1-2-100-4Z-P2-MaxIP	17	38.66	4.39731
20200830-S2-GPN-KO-A1-2-100-4Z-P1-MaxIP	360.42			20200830-S2-GPN-KO-A1-2-100-4Z-P1-MaxIP	10	31.79	3.14564
20200830-S2-GPN-KO-A1-2-100-4Z-P5.ics	388.45			20200830-S2-GPN-KO-A1-2-100-4Z-P5.ics	15	27.08	5.53914
20200830-S2-GPN-KO-A1-2-100-4Z-P3-MaxIP	610.07			20200830-S2-GPN-KO-A1-2-100-4Z-P3-MaxIP	16	32.06	4.99064
20200830-S2-GPN-KO-A1-2-100-4Z-P4-MaxIP	448.97	435.755		20200830-S2-GPN-KO-A1-2-100-4Z-P4-MaxIP	11	29.74	3.69872	4.30507
20200830-S2-GPN-KO-A1-3-100-4Z-P3-MaxIP	430.23			20200830-S2-GPN-KO-A1-3-100-4Z-P3-MaxIP	10	31.42	3.18269
20200830-S2-GPN-KO-A1-2-100-4Z-S-MaxIP	411.01			20200830-S2-GPN-KO-A1-2-100-4Z-S-MaxIP	16	34.22	4.67563
20200830-S2-GPN-KO-A1-3-100-4Z-P-MaxIP	322.25			20200830-S2-GPN-KO-A1-3-100-4Z-P-MaxIP	15	36.12	4.15282
20200830-S2-GPN-KO-A1-3-100-4Z-P-MaxIP	313.86			20200830-S2-GPN-KO-A1-3-100-4Z-P-MaxIP	17	31.29	5.43305
20200830-S2-GPN-KO-A1-3-100-4Z-P1-MaxIP	395.71			20200830-S2-GPN-KO-A1-3-100-4Z-P1-MaxIP	11	28.5	3.85965
20200830-S2-GPN-KO-A1-3-100-4Z-P2.ics	196.56	374.612		20200830-S2-GPN-KO-A1-3-100-4Z-P2.ics	15	33.34	4.4991	4.30049
20200830-S2-GPN-KO-A1-4-100-4Z-S-MaxIP	317.76			20200830-S2-GPN-KO-A1-4-100-4Z-S-MaxIP	6	12.56	4.77707
20200830-S2-GPN-KO-A1-4-100-4Z-P-MaxIP	492.52			20200830-S2-GPN-KO-A1-4-100-4Z-P-MaxIP	32	47.41	6.74963
20200830-S2-GPN-KO-A1-4-100-4Z-P1-MaxIP	312.64			20200830-S2-GPN-KO-A1-4-100-4Z-P1-MaxIP	35	67	5.22388
20200830-S2-GPN-KO-A1-4-100-4Z-P2-MaxIP	354.8			20200830-S2-GPN-KO-A1-4-100-4Z-P2-MaxIP	10	39	2.5641
20200830-S2-GPN-KO-A1-4-100-4Z-S1-MaxIP	328.71			20200830-S2-GPN-KO-A1-4-100-4Z-S1-MaxIP	6	29.43	2.03874
20200830-S2-GPN-KO-A1-4-100-4Z-P2-MaxIP	724.12	421.758		20200830-S2-GPN-KO-A1-4-100-4Z-P2-MaxIP	4	12.18	3.28407	4.10625
20200830-S2-GPN-KO-A1-6-100-4Z-P-MaxIP	577.28			20200830-S2-GPN-KO-A1-6-100-4Z-P-MaxIP	47	62.28	7.54656
20200830-S2-GPN-KO-A1-6-100-4Z-F-MaxIP	932.61			20200830-S2-GPN-KO-A1-6-100-4Z-F-MaxIP	28	28.22	9.92204
20200830-S2-GPN-KO-A1-6-100-4Z-T-MaxIP	555.57			20200830-S2-GPN-KO-A1-6-100-4Z-T-MaxIP	17	31.06	5.47328
20200830-S2-GPN-KO-A1-6-100-4Z-S1-MaxIP	678.04			20200830-S2-GPN-KO-A1-6-100-4Z-S1-MaxIP	24	32.33	7.42345
20200830-S2-GPN-KO-A1-6-100-4Z-T1-MaxIP	582.63	665.226		20200830-S2-GPN-KO-A1-6-100-4Z-T1-MaxIP	14	31.45	4.45151	6.96337
20200830-S2-GPN-KO-A1-8-100-4Z-P-MaxIP	454.33			20200830-S2-GPN-KO-A1-8-100-4Z-P-MaxIP	22	42.8	5.14019
20200830-S2-GPN-KO-A1-8-100-4Z-S1-MaxIP	571.69	513.01		20200830-S2-GPN-KO-A1-8-100-4Z-S1-MaxIP	14	18.87	7.41918	6.27969
20200830-S2-GPN-KO-A1-9-100-4Z-P-MaxIP	281.03			20200830-S2-GPN-KO-A1-9-100-4Z-P-MaxIP	12	31.13	3.8548
20200830-S2-GPN-KO-A1-9-100-4Z-P1-MaxIP	310.63			20200830-S2-GPN-KO-A1-9-100-4Z-P1-MaxIP	7	30.42	2.30112	3.07796
20200830-S2-GPN-KO-A1-10-100-4Z-P-MaxIP	428.11	295.83		20200830-S2-GPN-KO-A1-10-100-4Z-P-MaxIP	15	30.17	4.97183
20200830-S2-GPN-KO-A1-10-100-4Z-S-MaxIP	388.31	408.21		20200830-S2-GPN-KO-A1-10-100-4Z-S-MaxIP	20	42.08	4.75285	4.86234
20200830-S2-GPN-KO-A1-11-100-4Z-S1-MaxIP	621.72			20200830-S2-GPN-KO-A1-11-100-4Z-S1-MaxIP	18	59.1	3.04569
20200830-S2-GPN-KO-A1-11-100-4Z-P-MaxIP	740.55			20200830-S2-GPN-KO-A1-11-100-4Z-P-MaxIP	10	32.38	3.08833
20200830-S2-GPN-KO-A1-11-100-4Z-P1-MaxIP	852.69			20200830-S2-GPN-KO-A1-11-100-4Z-P1-MaxIP	26	50.7	5.12821
20200830-S2-GPN-KO-A1-11-100-4Z-P2-MaxIP	791.18			20200830-S2-GPN-KO-A1-11-100-4Z-P2-MaxIP	13	36.64	3.54803
20200830-S2-GPN-KO-A1-11-100-4Z-S-MaxIP	666.58	734.544		20200830-S2-GPN-KO-A1-11-100-4Z-S-MaxIP	9	31.45	2.86169	3.53439
20200830-S2-GPN-KO-A1-13-100-4Z-P-MaxIP	544.18			20200830-S2-GPN-KO-A1-13-100-4Z-P-MaxIP	29	47.88	6.05681
20200830-S2-GPN-KO-A1-13-100-4Z-P1-MaxIP	352.53			20200830-S2-GPN-KO-A1-13-100-4Z-P1-MaxIP	6	31.33	1.9151
20200830-S2-GPN-KO-A1-13-100-4Z-P2-MaxIP	567.54	488.083		20200830-S2-GPN-KO-A1-13-100-4Z-P2-MaxIP	10	27.43	3.64564	3.87252
20200830-S3-GPN-KO-A1-2-100-4Z-P-MaxIP	376.25			20200830-S3-GPN-KO-A1-2-100-4Z-P-MaxIP	15	56.93	2.63481
20200830-S3-GPN-KO-A1-2-100-4Z-P2-MaxIP	399.45	387.85		20200830-S3-GPN-KO-A1-2-100-4Z-P2-MaxIP	9	31.57	2.85081	2.74281
20200830-S3-GPN-KO-Y343-2-100-4Z-P-MaxIP	376.25			20200830-S3-GPN-KO-Y343-2-100-4Z-P-MaxIP	15	56.93	2.63481
20200830-S3-GPN-KO-Y343-2-100-4Z-P2-MaxIP	399.45			20200830-S3-GPN-KO-Y343-2-100-4Z-P2-MaxIP	9	31.57	2.85081
20200830-S3-GPN-KO-Y343-2-100-4Z-P3-MaxIP	422.49	399.397		20200830-S3-GPN-KO-Y343-2-100-4Z-P3-MaxIP	11	33.01	3.33232	2.93932
20200830-S3-GPN-KO-Y343-3-100-4Z-S-MaxIP	522.27			20200830-S3-GPN-KO-Y343-3-100-4Z-S-MaxIP	25	33.27	7.51428
20200830-S3-GPN-KO-Y343-3-100-4Z-F-MaxIP	301			20200830-S3-GPN-KO-Y343-3-100-4Z-F-MaxIP	12	30.61	3.92029
20200830-S3-GPN-KO-Y343-3-100-4Z-F1-MaxIP	311.54			20200830-S3-GPN-KO-Y343-3-100-4Z-F1-MaxIP	6	36.65	1.63711
20200830-S3-GPN-KO-Y343-3-100-4Z-P4-MaxIP	662.78			20200830-S3-GPN-KO-Y343-3-100-4Z-P4-MaxIP	23	32.09	7.16734
20200830-S3-GPN-KO-Y343-3-100-4Z-P5-MaxIP	365.91			20200830-S3-GPN-KO-Y343-3-100-4Z-P5-MaxIP	18	48.4	3.71901
20200830-S3-GPN-KO-Y343-3-100-4Z-S-MaxIP	518.44	446.99		20200830-S3-GPN-KO-Y343-3-100-4Z-S-MaxIP	31	31.86	9.73007	5.61468
20200830-S3-GPN-KO-Y343-5-100-4Z-S1-MaxIP	496.53			20200830-S3-GPN-KO-Y343-5-100-4Z-S1-MaxIP	10	35.3	2.83286
20200830-S3-GPN-KO-Y343-5-100-4Z-P-MaxIP	525.47			20200830-S3-GPN-KO-Y343-5-100-4Z-P-MaxIP	4	32.23	1.24108
20200830-S3-GPN-KO-Y343-5-100-4Z-P2-MaxIP	618.73			20200830-S3-GPN-KO-Y343-5-100-4Z-P2-MaxIP	6	32.34	1.85529
20200830-S3-GPN-KO-Y343-5-100-4Z-S-MaxIP	410.89	512.905		20200830-S3-GPN-KO-Y343-5-100-4Z-S-MaxIP	11	31.84	3.45477	2.346
20200830-S3-GPN-KO-Y343-7-100-4Z-P-MaxIP	693.98			20200830-S3-GPN-KO-Y343-7-100-4Z-P-MaxIP	10	44.01	2.27221
20200830-S3-GPN-KO-Y343-6-100-4Z-P-MaxIP	801.73			20200830-S3-GPN-KO-Y343-6-100-4Z-P-MaxIP	13	33.57	3.87251
20200830-S3-GPN-KO-Y343-6-100-4Z-P1-MaxIP	526.16			20200830-S3-GPN-KO-Y343-6-100-4Z-P1-MaxIP	15	31.57	4.75135
20200830-S3-GPN-KO-Y343-6-100-4Z-S-MaxIP	335.91	589.445		20200830-S3-GPN-KO-Y343-6-100-4Z-S-MaxIP	4	32.15	1.24417	3.03506
20200830-S3-GPN-KKK-1-100-4Z-P-MaxIP	526.951
20200830-S3-GPN-KKK-1-100-4Z-P-MaxIP	642.953	584.952
20200830-S3-GPN-KKK-1-100-4Z-P-MaxIP	530.45			20200830-S3-GPN-KKK-1-100-4Z-P-MaxIP	12	30.612	3.92003
20200830-S3-GPN-KKK-1-100-4Z-P-MaxIP	544.453	537.452	537.452	20200830-S3-GPN-KKK-1-100-4Z-P-MaxIP	20	32.2505	6.20146	5.06074
20200830-S3-GPN-KKK-1-100-4Z-P-MaxIP	612.473			20200830-S3-GPN-KKK-1-100-4Z-P-MaxIP	9	31.339	2.87182
20200830-S3-GPN-KKK-1-100-4Z-P-MaxIP	572.098			20200830-S3-GPN-KKK-1-100-4Z-P-MaxIP	20	32.049	6.24044
20200830-S3-GPN-KKK-1-100-4Z-P-MaxIP	548.384	577.652		20200830-S3-GPN-KKK-1-100-4Z-P-MaxIP	10	42.6001	2.9856	4.03262
20200830-S3-GPN-KKK-1-100-4Z-P-MaxIP	369.377			20200830-S3-GPN-KKK-1-100-4Z-P-MaxIP	8	31.804	2.51541
20200830-S3-GPN-KKK-1-100-4Z-P-MaxIP	329.693			20200830-S3-GPN-KKK-1-100-4Z-P-MaxIP	20	31.531	6.34296
20200830-S3-GPN-KKK-1-100-4Z-P-MaxIP	472.023	390.364		20200830-S3-GPN-KKK-1-100-4Z-P-MaxIP	7	29.5517	2.36873	3.74237
20200830-S3-GPN-KKK-1-100-4Z-P-MaxIP	340.443			20200830-S3-GPN-KKK-1-100-4Z-P-MaxIP	11	30.968	3.55205
20200830-S3-GPN-KKK-1-100-4Z-P-MaxIP	307.276			20200830-S3-GPN-KKK-1-100-4Z-P-MaxIP	10	31.134	3.21192
20200830-S3-GPN-KKK-1-100-4Z-P-MaxIP	438.796	362.172		20200830-S3-GPN-KKK-1-100-4Z-P-MaxIP	8	29.4706	2.71457	3.15951
20200830-S3-GPN-KKK-1-100-4Z-P-MaxIP	334.448			20200830-S3-GPN-KKK-1-100-4Z-P-MaxIP	7	32.236	2.17149
20200830-S3-GPN-KKK-1-100-4Z-P-MaxIP	364.935	349.692		20200830-S3-GPN-KKK-1-100-4Z-P-MaxIP	11	31.1403	3.5324	2.85194
20200830-S3-GPN-KKK-1-100-4Z-P-MaxIP	316.772			20200830-S3-GPN-KKK-1-100-4Z-P-MaxIP	5	32.739	1.52723
20200830-S3-GPN-KKK-1-100-4Z-P-MaxIP	356.881	336.827		20200830-S3-GPN-KKK-1-100-4Z-P-MaxIP	9	30.4856	2.95221	2.23972
20200830-S3-GPN-KKK-1-100-4Z-P-MaxIP	314.543			20200830-S3-GPN-KKK-1-100-4Z-P-MaxIP	7	31.295	2.23678
20200830-S3-GPN-KKK-1-100-4Z-P-MaxIP	338.305	326.424		20200830-S3-GPN-KKK-1-100-4Z-P-MaxIP	12	31.843	3.76849
20200830-S3-GPN-KKK-1-100-4Z-P-MaxIP	331.201			20200830-S3-GPN-KKK-1-100-4Z-P-MaxIP	9	31.876	2.82344
20200830-S3-GPN-KKK-1-100-4Z-P-MaxIP	302.294			20200830-S3-GPN-KKK-1-100-4Z-P-MaxIP	13	31.677	4.10392
20200830-S3-GPN-KKK-1-100-4Z-P-MaxIP	302	311.832
GFP-2A-Cre +p140cap				GFP-2A-Cre + EndoA1
MAX_20200830-S3-GPN-KO-P140-9-100-4Z-T-1-1.ics:0003-0469-0545	179.687			MAX_20200830-S3-GPN-KO-P140-9-100-4Z-T-1-1.ics:0003-0469-0545	1	28.145	0.355303
MAX_20200830-S3-GPN-KO-P140-9-100-4Z-S-1.ics:0003-0497-0512	406.006			MAX_20200830-S3-GPN-KO-P140-9-100-4Z-S-1.ics:0003-0497-0512	8	36.347	2.20101
MAX_20200830-S3-GPN-KO-P140-9-100-4Z-S1-1.ics:0003-0647-0594	2339.67			MAX_20200830-S3-GPN-KO-P140-9-100-4Z-S1-1.ics:0003-0647-0594	14	36.614	3.82367
MAX_20200830-S3-GPN-KO-P140-9-100-4Z-P1-1.ics:0003-0512-0413	425.314			MAX_20200830-S3-GPN-KO-P140-9-100-4Z-P1-1.ics:0003-0512-0413	18	31.384	5.73541
MAX_20200830-S3-GPN-KO-P140-9-100-4Z-P-1.ics:0003-0262-0512	532.601	776.655		MAX_20200830-S3-GPN-KO-P140-9-100-4Z-P-1.ics:0003-0262-0512	18	25.552	7.04446	3.83197
MAX_20200830-S3-GPN-KO-P140-8-100-4Z-T-1.ics:0003-0412-0560	268.258			MAX_20200830-S3-GPN-KO-P140-8-100-4Z-T-1.ics:0003-0412-0560	4	30.415	1.31514
MAX_20200830-S3-GPN-KO-P140-8-100-4Z-S-1.ics:0003-0512-0529	152.005			MAX_20200830-S3-GPN-KO-P140-8-100-4Z-S-1.ics:0003-0512-0529	4	30.481	1.31229
MAX_20200830-S3-GPN-KO-P140-8-100-4Z-P1-1.ics:0003-0512-0583	241.571			MAX_20200830-S3-GPN-KO-P140-8-100-4Z-P1-1.ics:0003-0512-0583	6	32.988	1.81884	1.48209
MAX_20200830-S3-GPN-KO-P140-8-100-4Z-P-1.ics:0003-0277-0512	256.333	229.542		MAX_20200830-S3-GPN-KO-P140-8-100-4Z-P-1.ics:0003-0277-0512	6	34.111	1.75896
MAX_20200830-S3-GPN-KO-P140-7-100-4Z-S1-1.ics:0003-0512-0440	420.087			MAX_20200830-S3-GPN-KO-P140-7-100-4Z-S1-1.ics:0003-0512-0440	12	54.103	2.21799
MAX_20200830-S3-GPN-KO-P140-7-100-4Z-T-1.ics:0003-0512-0342	445.536			MAX_20200830-S3-GPN-KO-P140-7-100-4Z-T-1.ics:0003-0512-0342	15	26.605	5.63804
MAX_20200830-S3-GPN-KO-P140-7-100-4Z-S-1.ics:0003-0516-0447	499.959			MAX_20200830-S3-GPN-KO-P140-7-100-4Z-S-1.ics:0003-0516-0447	7	31.247	2.24022
MAX_20200830-S3-GPN-KO-P140-7-100-4Z-P2-1.ics:0003-0512-0586	454.124			MAX_20200830-S3-GPN-KO-P140-7-100-4Z-P2-1.ics:0003-0512-0586	11	37.357	2.94456
MAX_20200830-S3-GPN-KO-P140-7-100-4Z-P1-1.ics:0003-0512-0828	439.899			MAX_20200830-S3-GPN-KO-P140-7-100-4Z-P1-1.ics:0003-0512-0828	3	36.052	0.832131
MAX_20200830-S3-GPN-KO-P140-7-100-4Z-F-1.ics:0003-0322-0512	381.258			MAX_20200830-S3-GPN-KO-P140-7-100-4Z-F-1.ics:0003-0322-0512	17	30.975	5.4883	3.01717
MAX_20200830-S3-GPN-KO-P140-7-100-4Z-P-1.ics:0003-0526-0512	503.08	449.135		MAX_20200830-S3-GPN-KO-P140-7-100-4Z-P-1.ics:0003-0526-0512	15	31.334	4.78713
MAX_20200830-S3-GPN-KO-P140-6-100-4Z-T2-1.ics:0003-0512-0585	358.045			MAX_20200830-S3-GPN-KO-P140-6-100-4Z-T2-1.ics:0003-0512-0585	6	33.061	1.81483
MAX_20200830-S3-GPN-KO-P140-6-100-4Z-S2-1.ics:0003-0533-0512	452.441			MAX_20200830-S3-GPN-KO-P140-6-100-4Z-S2-1.ics:0003-0533-0512	10	31.796	3.14505
MAX_20200830-S3-GPN-KO-P140-6-100-4Z-S-1.ics:0003-0512-0626	395.238			MAX_20200830-S3-GPN-KO-P140-6-100-4Z-S-1.ics:0003-0512-0626	9	33.328	2.70043
MAX_20200830-S3-GPN-KO-P140-6-100-4Z-F1-1.ics:0003-0512-0768	272.68			MAX_20200830-S3-GPN-KO-P140-6-100-4Z-F1-1.ics:0003-0512-0768	5	36.275	1.37836	2.76516
MAX_20200830-S3-GPN-KO-P140-6-100-4Z-F-1.ics:0003-0584-0512	191.782	334.037		MAX_20200830-S3-GPN-KO-P140-6-100-4Z-F-1.ics:0003-0584-0512	4	31.334	1.27657
MAX_20200830-S3-GPN-KO-P140-5-100-4Z-T-1.ics:0003-0561-0512	273.079			MAX_20200830-S3-GPN-KO-P140-5-100-4Z-T-1.ics:0003-0561-0512	5	32.775	1.52555
MAX_20200830-S3-GPN-KO-P140-5-100-4Z-S3-1-1.ics:0003-0512-0385	315.209			MAX_20200830-S3-GPN-KO-P140-5-100-4Z-S3-1-1.ics:0003-0512-0385	2
MAX_20200830-S3-GPN-KO-P140-5-100-4Z-S2-1-1.ics:0003-0455-0586	297.256			MAX_20200830-S3-GPN-KO-P140-5-100-4Z-S2-1-1.ics:0003-0455-0586	10	30.44	3.28515	3.28515
MAX_20200830-S3-GPN-KO-P140-5-100-4Z-P1-1.ics:0003-0551-0512	319.263			MAX_20200830-S3-GPN-KO-P140-5-100-4Z-P1-1.ics:0003-0551-0512	6	32.799	1.82932
20200830-S3-GPN-KO-P140-5-100-4Z-P-1.ics:0003-0523-0580	476.969			20200830-S3-GPN-KO-P140-5-100-4Z-P-1.ics:0003-0523-0580	10	30.877	3.23866
MAX_20200830-S3-GPN-KO-P140-5-100-4Z-P3-1.ics:0003-0545-0512	388.867	345.107		MAX_20200830-S3-GPN-KO-P140-5-100-4Z-P3-1.ics:0003-0545-0512	7	34.869	2.00751	2.3585
MAX_20200830-S3-GPN-KO-P140-4-100-4Z-P1-1.ics:0003-0381-0512	522.446			MAX_20200830-S3-GPN-KO-P140-4-100-4Z-P1-1.ics:0003-0381-0512	21	35.229	5.961
MAX_20200830-S3-GPN-KO-P140-4-100-4Z-T1-1.ics:0003-0505-0512	478.606	500.526		MAX_20200830-S3-GPN-KO-P140-4-100-4Z-T1-1.ics:0003-0505-0512	8	31.091	2.57309	4.26704
MAX_20200830-S3-GPN-KO-P140-3-100-4Z-P-1.ics:0003-0476-0433	403.899			MAX_20200830-S3-GPN-KO-P140-3-100-4Z-P-1.ics:0003-0476-0433	8	35.584	2.2482
MAX_20200830-S3-GPN-KO-P140-3-100-4Z-P5-1.ics:0003-0583-0551	531.016			MAX_20200830-S3-GPN-KO-P140-3-100-4Z-P5-1.ics:0003-0583-0551	17	30.016	5.66365
MAX_20200830-S3-GPN-KO-P140-3-100-4Z-S1-1.ics:0003-0512-0613	313.708			MAX_20200830-S3-GPN-KO-P140-3-100-4Z-S1-1.ics:0003-0512-0613	4	34.414	1.16232
MAX_20200830-S3-GPN-KO-P140-3-100-4Z-T-1.ics:0003-0498-0512	484.209			MAX_20200830-S3-GPN-KO-P140-3-100-4Z-T-1.ics:0003-0498-0512	15	30.867	4.85956
MAX_20200830-S3-GPN-KO-P140-3-100-4Z-T2-1.ics:0003-0512-0594	454.64			MAX_20200830-S3-GPN-KO-P140-3-100-4Z-T2-1.ics:0003-0512-0594	12	31.729	3.78203
MAX_20200830-S3-GPN-KO-P140-3-100-4Z-P1-1.ics:0003-0556-0537	423.692			MAX_20200830-S3-GPN-KO-P140-3-100-4Z-P1-1.ics:0003-0556-0537	9	29.045	3.09864
MAX_20200830-S3-GPN-KO-P140-3-100-4Z-P4-1.ics:0003-0596-0524	515.064			MAX_20200830-S3-GPN-KO-P140-3-100-4Z-P4-1.ics:0003-0596-0524	14	31.054	4.50828
MAX_20200830-S3-GPN-KO-P140-3-100-4Z-T3-1.ics:0003-0512-0648	482.299	451.066		MAX_20200830-S3-GPN-KO-P140-3-100-4Z-T3-1.ics:0003-0512-0648	4	43.258	0.924684	3.28092
MAX_20200830-S3-GPN-KO-P140-2-100-4Z-P-1.ics:0003-0512-0314	215.182			MAX_20200830-S3-GPN-KO-P140-2-100-4Z-P-1.ics:0003-0512-0314	8	37.575	2.12908
MAX_20200830-S3-GPN-KO-P140-2-100-4Z-P1-1.ics:0003-0512-0375	209.528			MAX_20200830-S3-GPN-KO-P140-2-100-4Z-P1-1.ics:0003-0512-0375	11	52.255	2.10506
MAX_20200830-S3-GPN-KO-P140-2-100-4Z-P3-1.ics:0003-0457-0506	195.079			MAX_20200830-S3-GPN-KO-P140-2-100-4Z-P3-1.ics:0003-0457-0506	11	28.768	3.82369
MAX_20200830-S3-GPN-KO-P140-2-100-4Z-P2-1.ics:0003-0512-0628	143.996	190.946		MAX_20200830-S3-GPN-KO-P140-2-100-4Z-P2-1.ics:0003-0512-0628	10	31.11	3.2144	2.81806
GFP + Vector				GFP + Vector
20210129-V-V-GPN647-flag555=GFP488-3-P-MaxIP	663.03			20210129-V-V-GPN647-flag555=GFP488-3-P-MaxIP	33	63.99	5.15706
20210129-V-V-GPN647-flag555=GFP488-3-T-MaxIP	795.81			20210129-V-V-GPN647-flag555=GFP488-3-T-MaxIP	15	32.51	4.61396
20210129-V-V-GPN647-flag555=GFP488-3-S-MaxIP	652.35	724.08		20210129-V-V-GPN647-flag555=GFP488-3-S-MaxIP	19	30.7	6.18893	5.31998
20210129-V-V-GPN647-flag555=GFP488-5-P-MaxIP 1	783.79	783.79		20210129-V-V-GPN647-flag555=GFP488-5-P-MaxIP 1	12	31.81	3.7724	3.7724
20210129-V-V-GPN647-flag555=GFP488-7-P-MaxIP	648.85			20210129-V-V-GPN647-flag555=GFP488-7-P-MaxIP	16	47.1	3.39703
20210129-V-V-GPN647-flag555=GFP488-7-S-MaxIP	726.45			20210129-V-V-GPN647-flag555=GFP488-7-S-MaxIP	10	28.97	3.45185
20210129-V-V-GPN647-flag555=GFP488-7-S1-MaxIP	569.19			20210129-V-V-GPN647-flag555=GFP488-7-S1-MaxIP	9	32.43	2.77521
20210129-V-V-GPN647-flag555=GFP488-7-P1-MaxIP	773.67	679.54		20210129-V-V-GPN647-flag555=GFP488-7-P1-MaxIP	18	31.12	5.78406	3.85204
20210129-V-V-GPN647-flag555=GFP488-1-P1-MaxIP	657.29			20210129-V-V-GPN647-flag555=GFP488-1-P1-MaxIP	19	33.73	5.63297
20210129-V-V-GPN647-flag555=GFP488-1-T-MaxIP	765.93			20210129-V-V-GPN647-flag555=GFP488-1-T-MaxIP	12	33.77	3.55345
20210129-V-V-GPN647-flag555=GFP488-1-P2-MaxIP	781.04			20210129-V-V-GPN647-flag555=GFP488-1-P2-MaxIP	6	32.39	1.85242
20210129-V-V-GPN647-flag555=GFP488-1-P3-MaxIP	894.96	774.805		20210129-V-V-GPN647-flag555=GFP488-1-P3-MaxIP	24	32.17	7.46037	4.6248
20210129-V-V-GPN647-flag555=GFP488-2-P-MaxIP	608.24			20210129-V-V-GPN647-flag555=GFP488-2-P-MaxIP	28	63.36	4.41919
20210129-V-V-GPN647-flag555=GFP488-2-P1-MaxIP	497.39	552.815		20210129-V-V-GPN647-flag555=GFP488-2-P1-MaxIP	12	32.02	3.74766	4.08342
20210129-V-V-GPN647-flag555=GFP488-4-P-MaxIP	881.61			20210129-V-V-GPN647-flag555=GFP488-4-P-MaxIP	24	31.84	7.53769
20210129-V-V-GPN647-flag555=GFP488-4-S-MaxIP	740.65			20210129-V-V-GPN647-flag555=GFP488-4-S-MaxIP	18	33.43	5.38439
20210129-V-V-GPN647-flag555=GFP488-4-T-MaxIP	755.21	792.49		20210129-V-V-GPN647-flag555=GFP488-4-T-MaxIP	13	37.98	3.42285	5.44831
20210129-V-V-GPN647-flag555=GFP488-6-F-MaxIP	666.34	666.34		20210129-V-V-GPN647-flag555=GFP488-6-F-MaxIP	12	34.66	3.4622	3.4622
GFP-2A-Cre + Vector				GFP-2A-Cre + Vector
20210129-CRE-V-GPN647-flag555=GFP488-1-P-MaxIP	550.99			20210129-CRE-V-GPN647-flag555=GFP488-1-P-MaxIP	6	32.65	1.83767
20210129-CRE-V-GPN647-flag555=GFP488-1-P-MaxIP	550.99			20210129-CRE-V-GPN647-flag555=GFP488-1-P-MaxIP	6	32.65	1.83767
20210129-CRE-V-GPN647-flag555=GFP488-1-S-MaxIP	627.43			20210129-CRE-V-GPN647-flag555=GFP488-1-S-MaxIP	7	32.1	2.18069
20210129-CRE-V-GPN647-flag555=GFP488-1-P-MaxIP	550.99	570.1		20210129-CRE-V-GPN647-flag555=GFP488-1-P-MaxIP	6	32.65	1.83767	1.92343
20210129-CRE-V-GPN647-flag555=GFP488-2-S-MaxIP	286.01			20210129-CRE-V-GPN647-flag555=GFP488-2-S-MaxIP	3	31.72	0.945776
20210129-CRE-V-GPN647-flag555=GFP488-2-F-MaxIP	309.97			20210129-CRE-V-GPN647-flag555=GFP488-2-F-MaxIP	7	32.02	2.18613
20210129-CRE-V-GPN647-flag555=GFP488-2-T-MaxIP	280.35			20210129-CRE-V-GPN647-flag555=GFP488-2-T-MaxIP	3	31.55	0.950872
20210129-CRE-V-GPN647-flag555=GFP488-2-p-MaxIP	304.96			20210129-CRE-V-GPN647-flag555=GFP488-2-p-MaxIP	4	36.07	1.10895
20210129-CRE-V-GPN647-flag555=GFP488-2-P1-MaxIP	350.54	306.366		20210129-CRE-V-GPN647-flag555=GFP488-2-P1-MaxIP	6	32.08	1.87032	1.41241
20210129-CRE-V-GPN647-flag555=GFP488-3-P-MaxIP	597.53			20210129-CRE-V-GPN647-flag555=GFP488-3-P-MaxIP	9	38.29	2.35048
20210129-CRE-V-GPN647-flag555=GFP488-3-S-MaxIP	459.1			20210129-CRE-V-GPN647-flag555=GFP488-3-S-MaxIP	8	50.34	1.58919
20210129-CRE-V-GPN647-flag555=GFP488-3-S1-MaxIP	467.91			20210129-CRE-V-GPN647-flag555=GFP488-3-S1-MaxIP	5	31.8	1.57233
20210129-CRE-V-GPN647-flag555=GFP488-3-S2-MaxIP	468.88			20210129-CRE-V-GPN647-flag555=GFP488-3-S2-MaxIP	6	31.67	1.89454
20210129-CRE-V-GPN647-flag555=GFP488-3-F-MaxIP	393.51			20210129-CRE-V-GPN647-flag555=GFP488-3-F-MaxIP	4	31.51	1.26944
20210129-CRE-V-GPN647-flag555=GFP488-3-T-MaxIP	310.87			20210129-CRE-V-GPN647-flag555=GFP488-3-T-MaxIP	3	33.08	0.906892
20210129-CRE-V-GPN647-flag555=GFP488-3-P1-MaxIP	381.63			20210129-CRE-V-GPN647-flag555=GFP488-3-P1-MaxIP	7	31.93	2.1923
20210129-CRE-V-GPN647-flag555=GFP488-3-P2-MaxIP	387.94	433.421		20210129-CRE-V-GPN647-flag555=GFP488-3-P2-MaxIP	8	31.63	2.52924	1.78805
20210129-CRE-V-GPN647-flag555=GFP488-4-T-MaxIP	262.03			20210129-CRE-V-GPN647-flag555=GFP488-4-T-MaxIP	6	57.16	1.04969
20210129-CRE-V-GPN647-flag555=GFP488-4-S-MaxIP	275.05			20210129-CRE-V-GPN647-flag555=GFP488-4-S-MaxIP	3	31.59	0.949668
20210129-CRE-V-GPN647-flag555=GFP488-4-P-MaxIP	410.5	315.86		20210129-CRE-V-GPN647-flag555=GFP488-4-P-MaxIP	4	32.35	1.23648	1.07861
20210129-CRE-V-GPN647-flag555=GFP488-5-P-MaxIP	351.34			20210129-CRE-V-GPN647-flag555=GFP488-5-P-MaxIP	3	33.85	0.886263
20210129-CRE-V-GPN647-flag555=GFP488-5-P1-MaxIP	256.5	303.92		20210129-CRE-V-GPN647-flag555=GFP488-5-P1-MaxIP	5	32.54	1.53657	1.21142
20210129-CRE-V-GPN647-flag555=GFP488-6-P-MaxIP	447.12			20210129-CRE-V-GPN647-flag555=GFP488-6-P-MaxIP	6	32.48	1.84729
20210129-CRE-V-GPN647-flag555=GFP488-6-P1-MaxIP	257.77	352.445		20210129-CRE-V-GPN647-flag555=GFP488-6-P1-MaxIP	4	32.55	1.22888	1.53808
20210129-CRE-V-GPN647-flag555=GFP488-8-P-MaxIP	570.54			20210129-CRE-V-GPN647-flag555=GFP488-8-P-MaxIP	5	31.55	1.58479
20210129-CRE-V-GPN647-flag555=GFP488-8-P1-MaxIP	337.08	453.81		20210129-CRE-V-GPN647-flag555=GFP488-8-P1-MaxIP	8	32.3	2.47678	2.03078
20210129-CRE-V-GPN647-flag555=GFP488-7-P1-MaxIP	544.22			20210129-CRE-V-GPN647-flag555=GFP488-7-P1-MaxIP	8	32.09	2.49299
20210129-CRE-V-GPN647-flag555=GFP488-7-S-MaxIP	715.75			20210129-CRE-V-GPN647-flag555=GFP488-7-S-MaxIP	17	31.61	5.37804
20210129-CRE-V-GPN647-flag555=GFP488-7-F-MaxIP	995.22			20210129-CRE-V-GPN647-flag555=GFP488-7-F-MaxIP	21	32.73	6.41613
20210129-CRE-V-GPN647-flag555=GFP488-7-T-MaxIP	760.25			20210129-CRE-V-GPN647-flag555=GFP488-7-T-MaxIP	15	33.08	4.53446
20210129-CRE-V-GPN647-flag555=GFP488-7-T1-MaxIP	608.38	724.764		20210129-CRE-V-GPN647-flag555=GFP488-7-T1-MaxIP	5	32.14	1.55569	4.07546
GFP-2A-Cre +p140cap				GFP-2A-Cre +p140cap
20210129-CRE-P140-GPN647-flag555=GFP488-1-P-MaxIP	481.52			20210129-CRE-P140-GPN647-flag555=GFP488-1-P-MaxIP	22	32.08	6.85786
20210129-CRE-P140-GPN647-flag555=GFP488-1-P1-MaxIP	414.68			20210129-CRE-P140-GPN647-flag555=GFP488-1-P1-MaxIP	24	45.06	5.32623
20210129-CRE-P140-GPN647-flag555=GFP488-1-S-MaxIP	674.02			20210129-CRE-P140-GPN647-flag555=GFP488-1-S-MaxIP	36	48.72	7.38916
20210129-CRE-P140-GPN647-flag555=GFP488-1-S2-MaxIP	583.63			20210129-CRE-P140-GPN647-flag555=GFP488-1-S2-MaxIP	10	31.63	3.16156
20210129-CRE-P140-GPN647-flag555=GFP488-1-S2-MaxIP	508.88			20210129-CRE-P140-GPN647-flag555=GFP488-1-S2-MaxIP	8	31.86	2.51099
20210129-CRE-P140-GPN647-flag555=GFP488-1-S3-MaxIP	578.38			20210129-CRE-P140-GPN647-flag555=GFP488-1-S3-MaxIP	11	31.32	3.51213
20210129-CRE-P140-GPN647-flag555=GFP488-1-T-MaxIP	591.73			20210129-CRE-P140-GPN647-flag555=GFP488-1-T-MaxIP	11	31.9	3.44828
20210129-CRE-P140-GPN647-flag555=GFP488-1-T1-MaxIP	465.88	537.34		20210129-CRE-P140-GPN647-flag555=GFP488-1-T1-MaxIP	13	32.68	3.97797	4.52302
20210129-CRE-P140-GPN647-flag555=GFP488-2-P1-MaxIP	245.55			20210129-CRE-P140-GPN647-flag555=GFP488-2-P1-MaxIP	1	32.03	0.312207
20210129-CRE-P140-GPN647-flag555=GFP488-2-S-MaxIP	366.62	306.085		20210129-CRE-P140-GPN647-flag555=GFP488-2-S-MaxIP	5	31.87	1.56887	0.94054
20210129-CRE-P140-GPN647-flag555=GFP488-3-P-MaxIP	431.96			20210129-CRE-P140-GPN647-flag555=GFP488-3-P-MaxIP	8	31.49	2.54049
20210129-CRE-P140-GPN647-flag555=GFP488-3-P1-MaxIP	469.31			20210129-CRE-P140-GPN647-flag555=GFP488-3-P1-MaxIP	6	31.42	1.90961
20210129-CRE-P140-GPN647-flag555=GFP488-3-S-MaxIP	314.6			20210129-CRE-P140-GPN647-flag555=GFP488-3-S-MaxIP	5	43.88	1.13947
20210129-CRE-P140-GPN647-flag555=GFP488-3-S1-MaxIP	824.37			20210129-CRE-P140-GPN647-flag555=GFP488-3-S1-MaxIP	22	32.03	6.86856
20210129-CRE-P140-GPN647-flag555=GFP488-3-S3-MaxIP	393.05	486.658		20210129-CRE-P140-GPN647-flag555=GFP488-3-S3-MaxIP	6	32.09	1.86974	2.86557
20210129-CRE-P140-GPN647-flag555=GFP488-5-F-MaxIP	278.28			20210129-CRE-P140-GPN647-flag555=GFP488-5-F-MaxIP	7	33.41	2.09518
20210129-CRE-P140-GPN647-flag555=GFP488-5-P-MaxIP	382.61			20210129-CRE-P140-GPN647-flag555=GFP488-5-P-MaxIP	13	46.49	2.7963
20210129-CRE-P140-GPN647-flag555=GFP488-5-P1-MaxIP	409.41			20210129-CRE-P140-GPN647-flag555=GFP488-5-P1-MaxIP	13	41.04	3.16764
20210129-CRE-P140-GPN647-flag555=GFP488-5-S-MaxIP	488.95			20210129-CRE-P140-GPN647-flag555=GFP488-5-S-MaxIP	6	31.63	1.89693
20210129-CRE-P140-GPN647-flag555=GFP488-5-S2-MaxIP	288.29	369.508		20210129-CRE-P140-GPN647-flag555=GFP488-5-S2-MaxIP	4	31.88	1.25471	2.24215
20210129-CRE-P140-GPN647-flag555=GFP488-6-F-MaxIP	424.28			20210129-CRE-P140-GPN647-flag555=GFP488-6-F-MaxIP	6	36.02	1.66574
20210129-CRE-P140-GPN647-flag555=GFP488-6-F1-MaxIP	328.46	376.37		20210129-CRE-P140-GPN647-flag555=GFP488-6-F1-MaxIP	1	31.8	0.314465	0.990103
20210129-CRE-P140-GPN647-flag555=GFP488-7-F-MaxIP	517			20210129-CRE-P140-GPN647-flag555=GFP488-7-F-MaxIP	15	32.63	4.597
20210129-CRE-P140-GPN647-flag555=GFP488-7-S-MaxIP	567.83			20210129-CRE-P140-GPN647-flag555=GFP488-7-S-MaxIP	8	32.26	2.47985
20210129-CRE-P140-GPN647-flag555=GFP488-7-T-MaxIP	424.87	503.233		20210129-CRE-P140-GPN647-flag555=GFP488-7-T-MaxIP	14	33.31	4.20294	3.75993
20210129-CRE-P140-GPN647-flag555=GFP488-8-F-MaxIP	221.03			20210129-CRE-P140-GPN647-flag555=GFP488-8-F-MaxIP	6	34.5	1.73913
20210129-CRE-P140-GPN647-flag555=GFP488-8-P1-MaxIP	281.09	251.06		20210129-CRE-P140-GPN647-flag555=GFP488-8-P1-MaxIP	10	31.41	3.1837	2.46141
20210129-CRE-P140-GPN647-flag555=GFP488-9-P1-MaxIP	183.39			20210129-CRE-P140-GPN647-flag555=GFP488-9-P1-MaxIP	3	33.02	0.90854	0.90854
20210129-CRE-P140-GPN647-flag555=GFP488-11-P-MaxIP	370.92			20210129-CRE-P140-GPN647-flag555=GFP488-11-P-MaxIP	11	31.98	3.43965
20210129-CRE-P140-GPN647-flag555=GFP488-11-S-MaxIP	410.83	321.713		20210129-CRE-P140-GPN647-flag555=GFP488-11-S-MaxIP	5	31.54	1.58529	2.51247
GFP-2A-Cre + Y343A				GFP-2A-Cre + Y343A
20210129-CRE-Y343-GPN647-flag555=GFP488-9-T1-MaxIP	272.08			20210129-CRE-Y343-GPN647-flag555=GFP488-9-T1-MaxIP	4	31.19	1.28246
20210129-CRE-Y343-GPN647-flag555=GFP488-9-T-MaxIP	404.85			20210129-CRE-Y343-GPN647-flag555=GFP488-9-T-MaxIP	19	31.79	5.97672
20210129-CRE-Y343-GPN647-flag555=GFP488-9-S1-MaxIP	197.53			20210129-CRE-Y343-GPN647-flag555=GFP488-9-S1-MaxIP	5	31.37	1.59388
20210129-CRE-Y343-GPN647-flag555=GFP488-9-S-MaxIP	338.77			20210129-CRE-Y343-GPN647-flag555=GFP488-9-S-MaxIP	9	31.31	2.87448
20210129-CRE-Y343-GPN647-flag555=GFP488-9-F-MaxIP	279.1	298.466		20210129-CRE-Y343-GPN647-flag555=GFP488-9-F-MaxIP	5	32.33	1.54655	2.65482
20210129-CRE-Y343-GPN647-flag555=GFP488-8-Tids-MaxIP	495.2			20210129-CRE-Y343-GPN647-flag555=GFP488-8-Tids-MaxIP	8	33.56	2.38379
20210129-CRE-Y343-GPN647-flag555=GFP488-8-T-MaxIP	802.74			20210129-CRE-Y343-GPN647-flag555=GFP488-8-T-MaxIP	20	32.11	6.22859
20210129-CRE-Y343-GPN647-flag555=GFP488-8-S3-MaxIP	1034			20210129-CRE-Y343-GPN647-flag555=GFP488-8-S3-MaxIP	21	32.07	6.54818
20210129-CRE-Y343-GPN647-flag555=GFP488-8-S2-MaxIP	1081.79			20210129-CRE-Y343-GPN647-flag555=GFP488-8-S2-MaxIP	16	32.37	4.94285
20210129-CRE-Y343-GPN647-flag555=GFP488-8-S2-MaxIP	986.56			20210129-CRE-Y343-GPN647-flag555=GFP488-8-S2-MaxIP	7	32.87	2.1296
20210129-CRE-Y343-GPN647-flag555=GFP488-8-S-MaxIP	637.98			20210129-CRE-Y343-GPN647-flag555=GFP488-8-S-MaxIP	10	32.8	3.04878
20210129-CRE-Y343-GPN647-flag555=GFP488-8-S-MaxIP	740.16			20210129-CRE-Y343-GPN647-flag555=GFP488-8-S-MaxIP	12	32.69	3.67085
20210129-CRE-Y343-GPN647-flag555=GFP488-8-P1-MaxIP	664.7			20210129-CRE-Y343-GPN647-flag555=GFP488-8-P1-MaxIP	19	41.82	4.54328
20210129-CRE-Y343-GPN647-flag555=GFP488-8-P-MaxIP	688.5			20210129-CRE-Y343-GPN647-flag555=GFP488-8-P-MaxIP	20	60.12	3.32668
20210129-CRE-Y343-GPN647-flag555=GFP488-8-F-MaxIP	733.77	786.54		20210129-CRE-Y343-GPN647-flag555=GFP488-8-F-MaxIP	14	32.49	4.30902	4.11316
20210129-CRE-Y343-GPN647-flag555=GFP488-7-T-MaxIP	187.96			20210129-CRE-Y343-GPN647-flag555=GFP488-7-T-MaxIP	3	31.37	0.956328
20210129-CRE-Y343-GPN647-flag555=GFP488-7-S-MaxIP	152.13			20210129-CRE-Y343-GPN647-flag555=GFP488-7-S-MaxIP	2	31.96	0.625782
20210129-CRE-Y343-GPN647-flag555=GFP488-7-P-MaxIP	173.26	171.117		20210129-CRE-Y343-GPN647-flag555=GFP488-7-P-MaxIP	5	32.25	1.55039	1.04417
20210129-CRE-Y343-GPN647-flag555=GFP488-6-T-MaxIP	185.4			20210129-CRE-Y343-GPN647-flag555=GFP488-6-T-MaxIP	4	36.27	1.10284
20210129-CRE-Y343-GPN647-flag555=GFP488-6-S-MaxIP	280			20210129-CRE-Y343-GPN647-flag555=GFP488-6-S-MaxIP	8	32.24	2.48139
20210129-CRE-Y343-GPN647-flag555=GFP488-6-P1-MaxIP	278.18	247.86		20210129-CRE-Y343-GPN647-flag555=GFP488-6-P1-MaxIP	8	32.43	2.46685	2.01703
20210129-CRE-Y343-GPN647-flag555=GFP488-5-P1-MaxIP	564.83			20210129-CRE-Y343-GPN647-flag555=GFP488-5-P1-MaxIP	21	54.47	3.85533
20210129-CRE-Y343-GPN647-flag555=GFP488-5-S-MaxIP	487.15	525.99		20210129-CRE-Y343-GPN647-flag555=GFP488-5-S-MaxIP	10	31.89	3.13578	3.49556
20210129-CRE-Y343-GPN647-flag555=GFP488-4-P-MaxIP	544.63			20210129-CRE-Y343-GPN647-flag555=GFP488-4-P-MaxIP	29	31.8	9.1195
20210129-CRE-Y343-GPN647-flag555=GFP488-4-P1-MaxIP	383.75			20210129-CRE-Y343-GPN647-flag555=GFP488-4-P1-MaxIP	13	31.73	4.09707
20210129-CRE-Y343-GPN647-flag555=GFP488-3-P-MaxIP	824.07	584.15		20210129-CRE-Y343-GPN647-flag555=GFP488-3-P-MaxIP	28	32.22	8.69025	7.30227
GFP + Vector				GFP + Vector
20210221-GFP-V-GPN647-FLAG555-1-P-MaxIP	343.51			20210221-GFP-V-GPN647-FLAG555-1-P-MaxIP	9	31.68	2.84091
20210221-GFP-V-GPN647-FLAG555-1-P1-MaxIP	909.27			20210221-GFP-V-GPN647-FLAG555-1-P1-MaxIP	25	31.8	7.86164
20210221-GFP-V-GPN647-FLAG555-1-P2-MaxIP	931.63			20210221-GFP-V-GPN647-FLAG555-1-P2-MaxIP	26	40.67	6.39292
20210221-GFP-V-GPN647-FLAG555-1-S-MaxIP	549.58			20210221-GFP-V-GPN647-FLAG555-1-S-MaxIP	9	32.22	2.7933
20210221-GFP-V-GPN647-FLAG555-2-P-MaxIP	1246.93	796.184		20210221-GFP-V-GPN647-FLAG555-2-P-MaxIP	28	32.03	8.7418	5.72611
20210221-GFP-V-GPN647-FLAG555-2-P1-MaxIP	1057.8			20210221-GFP-V-GPN647-FLAG555-2-P1-MaxIP	21	32.48	6.46552
20210221-GFP-V-GPN647-FLAG555-2-P2-MaxIP	1007.2			20210221-GFP-V-GPN647-FLAG555-2-P2-MaxIP	67	63.67	10.523
20210221-GFP-V-GPN647-FLAG555-2-S-MaxIP	568.47			20210221-GFP-V-GPN647-FLAG555-2-S-MaxIP	16	31.44	5.08906
20210221-GFP-V-GPN647-FLAG555-2-S1-MaxIP	818.79	863.065		20210221-GFP-V-GPN647-FLAG555-2-S1-MaxIP	22	32.63	6.74226	7.20496
20210221-GFP-V-GPN647-FLAG555-3-F-MaxIP	481.25			20210221-GFP-V-GPN647-FLAG555-3-F-MaxIP	13	32.29	4.02601
20210221-GFP-V-GPN647-FLAG555-3-P-MaxIP	428.91			20210221-GFP-V-GPN647-FLAG555-3-P-MaxIP	10	32.92	3.03767
20210221-GFP-V-GPN647-FLAG555-3-P1-MaxIP	486.07			20210221-GFP-V-GPN647-FLAG555-3-P1-MaxIP	8	34.17	2.34124
20210221-GFP-V-GPN647-FLAG555-3-S-MaxIP	327.53			20210221-GFP-V-GPN647-FLAG555-3-S-MaxIP	11	37.63	2.9232
20210221-GFP-V-GPN647-FLAG555-3-S1-MaxIP	337.78			20210221-GFP-V-GPN647-FLAG555-3-S1-MaxIP	9	30.54	2.94695
20210221-GFP-V-GPN647-FLAG555-3-T-MaxIP	386.12	407.943		20210221-GFP-V-GPN647-FLAG555-3-T-MaxIP	11	32.03	3.43428	3.11823
GFP-2A-Cre + Vector				GFP-2A-Cre + Vector
20210221-CRE-V-GPN647-FLAG555-1-P-MaxIP	480.58			20210221-CRE-V-GPN647-FLAG555-1-P-MaxIP	15	31.66	4.73784
20210221-CRE-V-GPN647-FLAG555-1-S-MaxIP	508.28			20210221-CRE-V-GPN647-FLAG555-1-S-MaxIP	11	31.86	3.45261
20210221-CRE-V-GPN647-FLAG555-1-S1-MaxIP	357.64			20210221-CRE-V-GPN647-FLAG555-1-S1-MaxIP	8	32.27	2.47908
20210221-CRE-V-GPN647-FLAG555-1-P2-MaxIP	355.03	425.382		20210221-CRE-V-GPN647-FLAG555-1-P2-MaxIP	6	31.73	1.89095	3.14012
20210221-CRE-V-GPN647-FLAG555-2-S-MaxIP	742.6			20210221-CRE-V-GPN647-FLAG555-2-S-MaxIP	21	32.27	6.50759
20210221-CRE-V-GPN647-FLAG555-2-P-MaxIP	736.78	739.69		20210221-CRE-V-GPN647-FLAG555-2-P-MaxIP	9	32.31	2.78552	4.64655
20210221-CRE-V-GPN647-FLAG555-3-S-MaxIP	403.72			20210221-CRE-V-GPN647-FLAG555-3-S-MaxIP	4	33.85	1.18168
20210221-CRE-V-GPN647-FLAG555-3-P-MaxIP	267.99	335.855		20210221-CRE-V-GPN647-FLAG555-3-P-MaxIP	6	63.25	0.948617	1.06515
20210221-CRE-V-GPN647-FLAG555-4-P1-MaxIP	282.96			20210221-CRE-V-GPN647-FLAG555-4-P1-MaxIP	6	31.62	1.89753
20210221-CRE-V-GPN647-FLAG555-5-P-MaxIP	317.71	300.335		20210221-CRE-V-GPN647-FLAG555-5-P-MaxIP	12	32.21	3.72555	2.81154
20210221-CRE-V-GPN647-FLAG555-6-P-MaxIP	439.75			20210221-CRE-V-GPN647-FLAG555-6-P-MaxIP	5	32.43	1.54178
20210221-CRE-V-GPN647-FLAG555-6-S-MaxIP	468.65			20210221-CRE-V-GPN647-FLAG555-6-S-MaxIP	10	32.01	3.12402
20210221-CRE-V-GPN647-FLAG555-6-P1-MaxIP	402.83	437.077		20210221-CRE-V-GPN647-FLAG555-6-P1-MaxIP	11	69.46	1.58365	2.08315
20210221-CRE-V-GPN647-FLAG555-7-S-MaxIP	485.44			20210221-CRE-V-GPN647-FLAG555-7-S-MaxIP	5	32.3	1.54799
20210221-CRE-V-GPN647-FLAG555-7-S1-MaxIP	653.63			20210221-CRE-V-GPN647-FLAG555-7-S1-MaxIP	13	32.47	4.0037
20210221-CRE-V-GPN647-FLAG555-7-P-MaxIP	433.44	524.17		20210221-CRE-V-GPN647-FLAG555-7-P-MaxIP	4	32.78	1.22026	2.25731
20210221-CRE-V-GPN647-FLAG555-8-P-MaxIP	419.64			20210221-CRE-V-GPN647-FLAG555-8-P-MaxIP	12	33.68	3.56295
20210221-CRE-V-GPN647-FLAG555-8-S-MaxIP	388.08			20210221-CRE-V-GPN647-FLAG555-8-S-MaxIP	9	31.66	2.8427
20210221-CRE-V-GPN647-FLAG555-8-S1-MaxIP	362.22			20210221-CRE-V-GPN647-FLAG555-8-S1-MaxIP	17	34.3	4.95627
20210221-CRE-V-GPN647-FLAG555-8-S2-MaxIP	343.7			20210221-CRE-V-GPN647-FLAG555-8-S2-MaxIP	6	34.72	1.72811
20210221-CRE-V-GPN647-FLAG555-8-S3-MaxIP	527.64			20210221-CRE-V-GPN647-FLAG555-8-S3-MaxIP	32	68.71	4.65726
20210221-CRE-V-GPN647-FLAG555-8-P1-MaxIP	475.55	464.417		20210221-CRE-V-GPN647-FLAG555-8-P1-MaxIP	9	31.82	2.82841	3.42928
20210221-CRE-V-GPN647-FLAG555-9-S-MaxIP	689.31			20210221-CRE-V-GPN647-FLAG555-9-S-MaxIP	18	49.29	3.65186
20210221-CRE-V-GPN647-FLAG555-9-P-MaxIP	595.37	642.34		20210221-CRE-V-GPN647-FLAG555-9-P-MaxIP	16	31.9	5.01567	4.33377
20210221-CRE-V-GPN647-FLAG555-10-P-MaxIP	392.51			20210221-CRE-V-GPN647-FLAG555-10-P-MaxIP	9	34.44	2.61324
20210221-CRE-V-GPN647-FLAG555-10-S-MaxIP	298.99			20210221-CRE-V-GPN647-FLAG555-10-S-MaxIP	5	32.59	1.53421
20210221-CRE-V-GPN647-FLAG555-10-P1-MaxIP	372.67	354.723		20210221-CRE-V-GPN647-FLAG555-10-P1-MaxIP	8	33.83	2.36477	2.17074
20210221-CRE-V-GPN647-FLAG555-11-P-MaxIP	290.99			20210221-CRE-V-GPN647-FLAG555-11-P-MaxIP	9	31.74	2.83554
20210221-CRE-V-GPN647-FLAG555-11-S-MaxIP	450.19			20210221-CRE-V-GPN647-FLAG555-11-S-MaxIP	14	56.83	2.46349
20210221-CRE-V-GPN647-FLAG555-11-S2-MaxIP	314.75			20210221-CRE-V-GPN647-FLAG555-11-S2-MaxIP	7	32.04	2.18477
20210221-CRE-V-GPN647-FLAG555-11-ST-MaxIP	275.51			20210221-CRE-V-GPN647-FLAG555-11-ST-MaxIP	4	31.3	1.27796
20210221-CRE-V-GPN647-FLAG555-11-P1-MaxIP	273.9			20210221-CRE-V-GPN647-FLAG555-11-P1-MaxIP	5	31.39	1.59286
20210221-CRE-V-GPN647-FLAG555-11-P2-MaxIP	296.23	351.702		20210221-CRE-V-GPN647-FLAG555-11-P2-MaxIP	7	31.62	2.21379	2.09473
20210221-CRE-V-GPN647-FLAG555-12-P-MaxIP	598.12			20210221-CRE-V-GPN647-FLAG555-12-P-MaxIP	11	33.18	3.31525
20210221-CRE-V-GPN647-FLAG555-13-P-MaxIP	413.13			20210221-CRE-V-GPN647-FLAG555-13-P-MaxIP	9	33.95	2.65096
20210221-CRE-V-GPN647-FLAG555-13-P1-MaxIP	414.72	413.925		20210221-CRE-V-GPN647-FLAG555-13-P1-MaxIP	8	31.8	2.51572	2.82731
20210221-CRE-V-GPN647-FLAG555-14-S-MaxIP	332.65			20210221-CRE-V-GPN647-FLAG555-14-S-MaxIP	12	31.63	3.79387
20210221-CRE-V-GPN647-FLAG555-14-S1-MaxIP	593.67			20210221-CRE-V-GPN647-FLAG555-14-S1-MaxIP	16	31.89	5.01725
20210221-CRE-V-GPN647-FLAG555-14-S2-MaxIP	352.38			20210221-CRE-V-GPN647-FLAG555-14-S2-MaxIP	5	31.69	1.57778
20210221-CRE-V-GPN647-FLAG555-14-P1-MaxIP	240.55	379.812		20210221-CRE-V-GPN647-FLAG555-14-P1-MaxIP	7	50.62	1.38285	2.94294
GFP-2A-Cre + EndoA1				GFP-2A-Cre + EndoA1
20210221-CRE-A1-GPN647-FLAG555-1-P1-MaxIP	526.98			20210221-CRE-A1-GPN647-FLAG555-1-P1-MaxIP	14	32.06	4.36681
20210221-CRE-A1-GPN647-FLAG555-1-S-MaxIP	570.27			20210221-CRE-A1-GPN647-FLAG555-1-S-MaxIP	14	32.2	4.34783
20210221-CRE-A1-GPN647-FLAG555-1-S1-MaxIP	562.76			20210221-CRE-A1-GPN647-FLAG555-1-S1-MaxIP	11	31.83	3.45586
20210221-CRE-A1-GPN647-FLAG555-1-T-MaxIP	470.05	527.816		20210221-CRE-A1-GPN647-FLAG555-1-T-MaxIP	14	38.3	3.65535	4.05576
20210221-CRE-A1-GPN647-FLAG555-2-P-MaxIP	445.86			20210221-CRE-A1-GPN647-FLAG555-2-P-MaxIP	15	50.57	2.96619
20210221-CRE-A1-GPN647-FLAG555-2-S1-MaxIP	510.77			20210221-CRE-A1-GPN647-FLAG555-2-S1-MaxIP	4	32.62	1.22624
20210221-CRE-A1-GPN647-FLAG555-2-T-MaxIP	442.22			20210221-CRE-A1-GPN647-FLAG555-2-T-MaxIP	21	32.12	6.53798
20210221-CRE-A1-GPN647-FLAG555-2-P1-MaxIP	582.46			20210221-CRE-A1-GPN647-FLAG555-2-P1-MaxIP	21	32.49	6.46353
20210221-CRE-A1-GPN647-FLAG555-2-S-MaxIP	738.47	543.956		20210221-CRE-A1-GPN647-FLAG555-2-S-MaxIP	25	32.36	7.72559	5.48833
20210221-CRE-A1-GPN647-FLAG555-3-P-MaxIP	630.85			20210221-CRE-A1-GPN647-FLAG555-3-P-MaxIP	32	55.53	5.76265
20210221-CRE-A1-GPN647-FLAG555-3-P1-MaxIP	430.14			20210221-CRE-A1-GPN647-FLAG555-3-P1-MaxIP	24	32.72	7.33496
20210221-CRE-A1-GPN647-FLAG555-3-S-MaxIP	464.74			20210221-CRE-A1-GPN647-FLAG555-3-S-MaxIP	15	31.15	4.81541
20210221-CRE-A1-GPN647-FLAG555-3-S1-MaxIP	501.76	506.873		20210221-CRE-A1-GPN647-FLAG555-3-S1-MaxIP	16	32.08	4.98753	5.72514
20210221-CRE-A1-GPN647-FLAG555-4-P1-MaxIP	464.82			20210221-CRE-A1-GPN647-FLAG555-4-P1-MaxIP	27	47.71	5.65919
20210221-CRE-A1-GPN647-FLAG555-4-P2-MaxIP	503.47			20210221-CRE-A1-GPN647-FLAG555-4-P2-MaxIP	34	43.91	7.74311
20210221-CRE-A1-GPN647-FLAG555-4-S-MaxIP	639.63			20210221-CRE-A1-GPN647-FLAG555-4-S-MaxIP	20	31.81	6.28733
20210221-CRE-A1-GPN647-FLAG555-4-T-MaxIP	401.75	502.418		20210221-CRE-A1-GPN647-FLAG555-4-T-MaxIP	27	50.38	5.35927	6.26223
20210221-CRE-A1-GPN647-FLAG555-5-P-MaxIP	445.49			20210221-CRE-A1-GPN647-FLAG555-5-P-MaxIP	21	31.98	6.5666
20210221-CRE-A1-GPN647-FLAG555-5-P1-MaxIP	462.15			20210221-CRE-A1-GPN647-FLAG555-5-P1-MaxIP	16	32.18	4.97203
20210221-CRE-A1-GPN647-FLAG555-5-S-MaxIP	556.6			20210221-CRE-A1-GPN647-FLAG555-5-S-MaxIP	35	33.78	10.3612
20210221-CRE-A1-GPN647-FLAG555-5-S1-MaxIP	451.67			20210221-CRE-A1-GPN647-FLAG555-5-S1-MaxIP	22	31.54	6.97527
20210221-CRE-A1-GPN647-FLAG555-5-T-MaxIP	396.13	462.408		20210221-CRE-A1-GPN647-FLAG555-5-T-MaxIP	21	31.27	6.7157	7.11815
20210221-CRE-A1-GPN647-FLAG555-6-P-MaxIP	695.53			20210221-CRE-A1-GPN647-FLAG555-6-P-MaxIP	12	33.34	3.59928
20210221-CRE-A1-GPN647-FLAG555-6-P1-MaxIP	517.43			20210221-CRE-A1-GPN647-FLAG555-6-P1-MaxIP	17	62.93	2.70141
20210221-CRE-A1-GPN647-FLAG555-6-S-MaxIP	470.08			20210221-CRE-A1-GPN647-FLAG555-6-S-MaxIP	12	34.41	3.48736	3.26268
20210221-CRE-A1-GPN647-FLAG555-7-P-MaxIP	358.84			20210221-CRE-A1-GPN647-FLAG555-7-P-MaxIP	12	26.89	4.46263
20210221-CRE-A1-GPN647-FLAG555-7-P1-MaxIP	388.9	373.87		20210221-CRE-A1-GPN647-FLAG555-7-P1-MaxIP	5	33.41	1.49656	2.97959
20210221-CRE-A1-GPN647-FLAG555-8-F-MaxIP	732.06			20210221-CRE-A1-GPN647-FLAG555-8-F-MaxIP	15	31.93	4.69778
20210221-CRE-A1-GPN647-FLAG555-8-P-MaxIP	618.51			20210221-CRE-A1-GPN647-FLAG555-8-P-MaxIP	28	33.57	8.34078
20210221-CRE-A1-GPN647-FLAG555-8-P1-MaxIP	699.06			20210221-CRE-A1-GPN647-FLAG555-8-P1-MaxIP	18	31.53	5.70885
20210221-CRE-A1-GPN647-FLAG555-8-S-MaxIP	706.36			20210221-CRE-A1-GPN647-FLAG555-8-S-MaxIP	19	33.04	5.75061
20210221-CRE-A1-GPN647-FLAG555-8-S2-MaxIP	510.05			20210221-CRE-A1-GPN647-FLAG555-8-S2-MaxIP	21	36.42	5.76606
20210221-CRE-A1-GPN647-FLAG555-8-T-MaxIP	649.82			20210221-CRE-A1-GPN647-FLAG555-8-T-MaxIP	22	33.05	6.65658
20210221-CRE-A1-GPN647-FLAG555-8-T1-MaxIP	594.48	644.334		20210221-CRE-A1-GPN647-FLAG555-8-T1-MaxIP	34	50.53	6.72868	6.23562
20210221-CRE-A1-GPN647-FLAG555-9-P-MaxIP	652.51			20210221-CRE-A1-GPN647-FLAG555-9-P-MaxIP	20	32.77	6.10314
20210221-CRE-A1-GPN647-FLAG555-9-S-MaxIP	668.55			20210221-CRE-A1-GPN647-FLAG555-9-S-MaxIP	15	32.35	4.63679
20210221-CRE-A1-GPN647-FLAG555-9-T-MaxIP	601.25	640.77		20210221-CRE-A1-GPN647-FLAG555-9-T-MaxIP	13	31.58	4.11653	4.95215
20210221-CRE-A1-GPN647-FLAG555-10-P-MaxIP	578.62			20210221-CRE-A1-GPN647-FLAG555-10-P-MaxIP	33	35.29	9.35109
20210221-CRE-A1-GPN647-FLAG555-10-P1-MaxIP	615.9			20210221-CRE-A1-GPN647-FLAG555-10-P1-MaxIP	52	60.21	8.63644
20210221-CRE-A1-GPN647-FLAG555-10-S-MaxIP	658.24	617.587		20210221-CRE-A1-GPN647-FLAG555-10-S-MaxIP	17	26.21	6.48607	8.15787
20210221-CRE-A1-GPN647-FLAG555-19-S-MaxIP	436.18			20210221-CRE-A1-GPN647-FLAG555-19-S-MaxIP	13	32.87	3.95497
20210221-CRE-A1-GPN647-FLAG555-19-P2-MaxIP	461.92			20210221-CRE-A1-GPN647-FLAG555-19-P2-MaxIP	13	32.43	4.00863
20210221-CRE-A1-GPN647-FLAG555-19-P1-MaxIP	401.91	433.337		20210221-CRE-A1-GPN647-FLAG555-19-P1-MaxIP	18	32.52	5.53506	4.49955
20210221-CRE-A1-GPN647-FLAG555-18-S1-MaxIP	498.63			20210221-CRE-A1-GPN647-FLAG555-18-S1-MaxIP	13	30.75	4.22764
20210221-CRE-A1-GPN647-FLAG555-18-S-MaxIP	352.38			20210221-CRE-A1-GPN647-FLAG555-18-S-MaxIP	16	31.36	5.10204
20210221-CRE-A1-GPN647-FLAG555-18-P1-MaxIP	386.1			20210221-CRE-A1-GPN647-FLAG555-18-P1-MaxIP	17	32.11	5.2943
20210221-CRE-A1-GPN647-FLAG555-18-P-MaxIP	417.35	413.615		20210221-CRE-A1-GPN647-FLAG555-18-P-MaxIP	12	38.75	3.09677	4.43019
20210221-CRE-A1-GPN647-FLAG555-17-P1-MaxIP	561.1			20210221-CRE-A1-GPN647-FLAG555-17-P1-MaxIP	18	32.13	5.60224
20210221-CRE-A1-GPN647-FLAG555-17-P-MaxIP	737.61			20210221-CRE-A1-GPN647-FLAG555-17-P-MaxIP	35	45.43	7.70416	6.6532
20210221-CRE-A1-GPN647-FLAG555-16-T-MaxIP	565.88			20210221-CRE-A1-GPN647-FLAG555-16-T-MaxIP	12	31.91	3.76058
20210221-CRE-A1-GPN647-FLAG555-16-S1-MaxIP	617.83			20210221-CRE-A1-GPN647-FLAG555-16-S1-MaxIP	21	34.92	6.01375
20210221-CRE-A1-GPN647-FLAG555-16-p-MaxIP	433.69			20210221-CRE-A1-GPN647-FLAG555-16-p-MaxIP	17	31.31	5.42958
20210221-CRE-A1-GPN647-FLAG555-16-S-MaxIP	552.28			20210221-CRE-A1-GPN647-FLAG555-16-S-MaxIP	12	32.63	3.6776
20210221-CRE-A1-GPN647-FLAG555-16-p2-MaxIP	458.81			20210221-CRE-A1-GPN647-FLAG555-16-p2-MaxIP	21	33.62	6.24628
20210221-CRE-A1-GPN647-FLAG555-16-p1-MaxIP	548.76			20210221-CRE-A1-GPN647-FLAG555-16-p1-MaxIP	17	39.36	4.31911
20210221-CRE-A1-GPN647-FLAG555-16-p-MaxIP	417.81	513.58		20210221-CRE-A1-GPN647-FLAG555-16-p-MaxIP	17	29.07	5.84795	5.04212
20210221-CRE-A1-GPN647-FLAG555-14-F-MaxIP	775.88			20210221-CRE-A1-GPN647-FLAG555-14-F-MaxIP	11	31.8	3.45912
20210221-CRE-A1-GPN647-FLAG555-14-S1-MaxIP	830.08			20210221-CRE-A1-GPN647-FLAG555-14-S1-MaxIP	15	31.61	4.74533
20210221-CRE-A1-GPN647-FLAG555-14-S-MaxIP	828.26			20210221-CRE-A1-GPN647-FLAG555-14-S-MaxIP	22	32.18	6.83654
20210221-CRE-A1-GPN647-FLAG555-14-P1-MaxIP	580.06			20210221-CRE-A1-GPN647-FLAG555-14-P1-MaxIP	13	32.56	3.99263
20210221-CRE-A1-GPN647-FLAG555-14-P-MaxIP	613.36	725.528		20210221-CRE-A1-GPN647-FLAG555-14-P-MaxIP	18	32.05	5.61622	4.92997
20210221-CRE-A1-GPN647-FLAG555-13-T-MaxIP	541.49			20210221-CRE-A1-GPN647-FLAG555-13-T-MaxIP	7	32.24	2.17122
20210221-CRE-A1-GPN647-FLAG555-13-S-MaxIP	571.34	556.415		20210221-CRE-A1-GPN647-FLAG555-13-S-MaxIP	9	32.26	2.78983	2.48052
20210221-CRE-A1-GPN647-FLAG555-12-S-MaxIP	479.19			20210221-CRE-A1-GPN647-FLAG555-12-S-MaxIP	26	77	3.37662
20210221-CRE-A1-GPN647-FLAG555-12-P1-MaxIP	424.53			20210221-CRE-A1-GPN647-FLAG555-12-P1-MaxIP	8	31.94	2.5047
20210221-CRE-A1-GPN647-FLAG555-12-P-MaxIP	590.94	498.22		20210221-CRE-A1-GPN647-FLAG555-12-P-MaxIP	13	32.24	4.03226	3.30453
20210221-CRE-A1-GPN647-FLAG555-11-F-MaxIP	489.14			20210221-CRE-A1-GPN647-FLAG555-11-F-MaxIP	14	36.14	3.87382
20210221-CRE-A1-GPN647-FLAG555-11-T-MaxIP	808.21			20210221-CRE-A1-GPN647-FLAG555-11-T-MaxIP	18	31.14	5.78035
20210221-CRE-A1-GPN647-FLAG555-11-P1-MaxIP	680.88			20210221-CRE-A1-GPN647-FLAG555-11-P1-MaxIP	57	63.98	8.90903
20210221-CRE-A1-GPN647-FLAG555-11-S-MaxIP	699.17			20210221-CRE-A1-GPN647-FLAG555-11-S-MaxIP	20	31.52	6.34518
20210221-CRE-A1-GPN647-FLAG555-15-F-MaxIP	360.38	607.556		20210221-CRE-A1-GPN647-FLAG555-15-F-MaxIP	4	35.29	1.13347	5.20837
GFP-2A-Cre +Y343A
20210221-CRE-Y343-GPN647-FLAG555-1-P-MaxIP	475.91			20210221-CRE-Y343-GPN647-FLAG555-1-P-MaxIP	9	44.55	2.0202
20210221-CRE-Y343-GPN647-FLAG555-1-S-MaxIP	381.96	428.935		20210221-CRE-Y343-GPN647-FLAG555-1-S-MaxIP	12	31.49	3.81073	2.91547
20210221-CRE-Y343-GPN647-FLAG555-2-F-MaxIP	387.36			20210221-CRE-Y343-GPN647-FLAG555-2-F-MaxIP	8	54.43	1.46978
20210221-CRE-Y343-GPN647-FLAG555-2-P-MaxIP	525.52			20210221-CRE-Y343-GPN647-FLAG555-2-P-MaxIP	13	38.32	3.39248
20210221-CRE-Y343-GPN647-FLAG555-2-P1-MaxIP	380.54			20210221-CRE-Y343-GPN647-FLAG555-2-P1-MaxIP	9	38.62	2.3304
20210221-CRE-Y343-GPN647-FLAG555-2-S1-MaxIP	354.82			20210221-CRE-Y343-GPN647-FLAG555-2-S1-MaxIP	9	38.3	2.34987
20210221-CRE-Y343-GPN647-FLAG555-2-S2-MaxIP	414.22			20210221-CRE-Y343-GPN647-FLAG555-2-S2-MaxIP	6	31.85	1.88383
20210221-CRE-Y343-GPN647-FLAG555-2-T-MaxIP	484.67			20210221-CRE-Y343-GPN647-FLAG555-2-T-MaxIP	11	32.35	3.40031	2.47111
20210221-CRE-Y343-GPN647-FLAG555-2-T1-MaxIP	535.63	440.394		20210221-CRE-Y343-GPN647-FLAG555-2-T1-MaxIP	12	33.37	3.59604
20210221-CRE-Y343-GPN647-FLAG555-3-P-MaxIP	485.87			20210221-CRE-Y343-GPN647-FLAG555-3-P-MaxIP	3	37.14	0.807754
20210221-CRE-Y343-GPN647-FLAG555-3-P1-MaxIP	336.97			20210221-CRE-Y343-GPN647-FLAG555-3-P1-MaxIP	6	31.62	1.89753
20210221-CRE-Y343-GPN647-FLAG555-3-S1-MaxIP	326.16	383		20210221-CRE-Y343-GPN647-FLAG555-3-S1-MaxIP	2	33.09	0.604412	1.72644
20210221-CRE-Y343-GPN647-FLAG555-4-P1-MaxIP	674.4			20210221-CRE-Y343-GPN647-FLAG555-4-P1-MaxIP	9	31.1	2.89389
20210221-CRE-Y343-GPN647-FLAG555-4-P-MaxIP	427.07	550.735		20210221-CRE-Y343-GPN647-FLAG555-4-P-MaxIP	2	33.12	0.603865	1.74888
20210221-CRE-Y343-GPN647-FLAG555-9-P-MaxIP	303.16			20210221-CRE-Y343-GPN647-FLAG555-9-P-MaxIP	7	44.54	1.57162
20210221-CRE-Y343-GPN647-FLAG555-8-P1-MaxIP	543.74			20210221-CRE-Y343-GPN647-FLAG555-8-P1-MaxIP	9	33.55	2.68256
20210221-CRE-Y343-GPN647-FLAG555-8-P-MaxIP	518.92	455.273		20210221-CRE-Y343-GPN647-FLAG555-8-P-MaxIP	7	31.85	2.1978	2.15066
20210221-CRE-Y343-GPN647-FLAG555-7-T-MaxIP	301.49			20210221-CRE-Y343-GPN647-FLAG555-7-T-MaxIP	7	31.64	2.21239
20210221-CRE-Y343-GPN647-FLAG555-7-S-MaxIP	395.45			20210221-CRE-Y343-GPN647-FLAG555-7-S-MaxIP	6	31.64	1.89633
20210221-CRE-Y343-GPN647-FLAG555-7-P1-MaxIP	670.27			20210221-CRE-Y343-GPN647-FLAG555-7-P1-MaxIP	21	50.57	4.15266
20210221-CRE-Y343-GPN647-FLAG555-7-P-MaxIP	706.54	518.438		20210221-CRE-Y343-GPN647-FLAG555-7-P-MaxIP	11	31.11	3.53584	2.94931
20210221-CRE-Y343-GPN647-FLAG555-6-S2-MaxIP	433.9			20210221-CRE-Y343-GPN647-FLAG555-6-S2-MaxIP	7	35.32	1.98188
20210221-CRE-Y343-GPN647-FLAG555-6-S1-MaxIP	497.54			20210221-CRE-Y343-GPN647-FLAG555-6-S1-MaxIP	8	33.36	2.39808
20210221-CRE-Y343-GPN647-FLAG555-6-S-MaxIP	509.68			20210221-CRE-Y343-GPN647-FLAG555-6-S-MaxIP	10	32.52	3.07503
20210221-CRE-Y343-GPN647-FLAG555-6-P2-MaxIP	485.86			20210221-CRE-Y343-GPN647-FLAG555-6-P2-MaxIP	9	31.71	2.83822
20210221-CRE-Y343-GPN647-FLAG555-6-P1-MaxIP	511.96			20210221-CRE-Y343-GPN647-FLAG555-6-P1-MaxIP	16	47.95	3.33681
20210221-CRE-Y343-GPN647-FLAG555-6-p-MaxIP	684.02			20210221-CRE-Y343-GPN647-FLAG555-6-p-MaxIP	12	31.82	3.77121
20210221-CRE-Y343-GPN647-FLAG555-6-F-MaxIP	425.44			20210221-CRE-Y343-GPN647-FLAG555-6-F-MaxIP	13	35.59	3.65271
20210221-CRE-Y343-GPN647-FLAG555-6-F1-MaxIP	440.13			20210221-CRE-Y343-GPN647-FLAG555-6-F1-MaxIP	9	32.22	2.7933
20210221-CRE-Y343-GPN647-FLAG555-6-F1-MaxIP	433.73	491.362		20210221-CRE-Y343-GPN647-FLAG555-6-F1-MaxIP	9	32.21	2.79416	2.96016
GFP-2A-Cre +p140cap				GFP-2A-Cre +p140cap
20210221-CRE-P140-GPN647-FLAG555-1-F-MaxIP	404.86			20210221-CRE-P140-GPN647-FLAG555-1-F-MaxIP	6	32.06	1.87149
20210221-CRE-P140-GPN647-FLAG555-1-P1-MaxIP	686.58			20210221-CRE-P140-GPN647-FLAG555-1-P1-MaxIP	19	47.58	3.99327
20210221-CRE-P140-GPN647-FLAG555-1-S-MaxIP	680.95			20210221-CRE-P140-GPN647-FLAG555-1-S-MaxIP	9	31.8	2.83019
20210221-CRE-P140-GPN647-FLAG555-1-S1-MaxIP	376			20210221-CRE-P140-GPN647-FLAG555-1-S1-MaxIP	4	32.15	1.24417
20210221-CRE-P140-GPN647-FLAG555-1-S2-MaxIP	482.91			20210221-CRE-P140-GPN647-FLAG555-1-S2-MaxIP	6	31.71	1.89215
20210221-CRE-P140-GPN647-FLAG555-1-T-MaxIP	641.82	545.52		20210221-CRE-P140-GPN647-FLAG555-1-T-MaxIP	8	31.46	2.54291	2.3957
20210221-CRE-P140-GPN647-FLAG555-2-P-MaxIP	1367.92			20210221-CRE-P140-GPN647-FLAG555-2-P-MaxIP	26	31.59	8.23045
20210221-CRE-P140-GPN647-FLAG555-2-P1-MaxIP	876.6			20210221-CRE-P140-GPN647-FLAG555-2-P1-MaxIP	13	32.86	3.95618
20210221-CRE-P140-GPN647-FLAG555-2-S-MinIP	597.09			20210221-CRE-P140-GPN647-FLAG555-2-S-MinIP	12	31.89	3.76294
20210221-CRE-P140-GPN647-FLAG555-2-T-MaxIP	842.74	921.087		20210221-CRE-P140-GPN647-FLAG555-2-T-MaxIP	13	32.14	4.0448	4.99859
20210221-CRE-P140-GPN647-FLAG555-3-P-MaxIP	1058.86			20210221-CRE-P140-GPN647-FLAG555-3-P-MaxIP	10	32.09	3.11624
20210221-CRE-P140-GPN647-FLAG555-3-S-MaxIP	828.88	943.87		20210221-CRE-P140-GPN647-FLAG555-3-S-MaxIP	6	32.73	1.83318	2.47471
20210221-CRE-P140-GPN647-FLAG555-4-P-MaxIP	347.01			20210221-CRE-P140-GPN647-FLAG555-4-P-MaxIP	15	69.76	2.15023
20210221-CRE-P140-GPN647-FLAG555-4-S-MaxIP	354.88			20210221-CRE-P140-GPN647-FLAG555-4-S-MaxIP	7	32	2.1875
20210221-CRE-P140-GPN647-FLAG555-4-T-MaxIP	257.81	319.9		20210221-CRE-P140-GPN647-FLAG555-4-T-MaxIP	9	31.7	2.83912	2.39228
20210221-CRE-P140-GPN647-FLAG555-5-P-MaxIP	372.36			20210221-CRE-P140-GPN647-FLAG555-5-P-MaxIP	3	31.71	0.946074
20210221-CRE-P140-GPN647-FLAG555-5-S1-MaxIP	298.23			20210221-CRE-P140-GPN647-FLAG555-5-S1-MaxIP	4	33.43	1.19653
20210221-CRE-P140-GPN647-FLAG555-5-T-MaxIP	402.69	357.76		20210221-CRE-P140-GPN647-FLAG555-5-T-MaxIP	12	38.49	3.11769	1.75343
20210221-CRE-P140-GPN647-FLAG555-6-P1-MaxIP	359.98			20210221-CRE-P140-GPN647-FLAG555-6-P1-MaxIP	6	31.98	1.87617
20210221-CRE-P140-GPN647-FLAG555-6-P2-MaxIP	380.5	370.24		20210221-CRE-P140-GPN647-FLAG555-6-P2-MaxIP	4	32.31	1.23801	1.55709
20210221-CRE-P140-GPN647-FLAG555-14-P-MaxIP	189.52			20210221-CRE-P140-GPN647-FLAG555-14-P-MaxIP	3	37.6	0.797872
20210221-CRE-P140-GPN647-FLAG555-13-S1-MaxIP 1	289.78			20210221-CRE-P140-GPN647-FLAG555-13-S1-MaxIP 1	7	31.53	2.22011
20210221-CRE-P140-GPN647-FLAG555-13-S-MaxIP	306.69			20210221-CRE-P140-GPN647-FLAG555-13-S-MaxIP	8	34.55	2.31548
20210221-CRE-P140-GPN647-FLAG555-13-P1-MaxIP	255.57			20210221-CRE-P140-GPN647-FLAG555-13-P1-MaxIP	5	32.03	1.56104
20210221-CRE-P140-GPN647-FLAG555-13-P-MaxIP	485.93	334.493		20210221-CRE-P140-GPN647-FLAG555-13-P-MaxIP	10	32.11	3.11429
20210221-CRE-P140-GPN647-FLAG555-12-S-MaxIP	603.76			20210221-CRE-P140-GPN647-FLAG555-12-S-MaxIP	8	31.46	2.54291	2.35077
20210221-CRE-P140-GPN647-FLAG555-11-T-MaxIP	438.3			20210221-CRE-P140-GPN647-FLAG555-11-T-MaxIP	8	31.66	2.52685
20210221-CRE-P140-GPN647-FLAG555-11-P-MaxIP	395.45			20210221-CRE-P140-GPN647-FLAG555-11-P-MaxIP	5	33.04	1.51332
20210221-CRE-P140-GPN647-FLAG555-11-S-MaxIP	491.16			20210221-CRE-P140-GPN647-FLAG555-11-S-MaxIP	7	32.12	2.17933
20210221-CRE-P140-GPN647-FLAG555-11-S1-MaxIP	268.82	398.433		20210221-CRE-P140-GPN647-FLAG555-11-S1-MaxIP	1	32.56	0.307125	1.63165
20210221-CRE-P140-GPN647-FLAG555-10-T1-MaxIP	530.47			20210221-CRE-P140-GPN647-FLAG555-10-T1-MaxIP	9	31.65	2.8436
20210221-CRE-P140-GPN647-FLAG555-10-P-MaxIP	640.97	585.72		20210221-CRE-P140-GPN647-FLAG555-10-P-MaxIP	14	45.88	3.05144	2.94752
20210221-CRE-P140-GPN647-FLAG555-9-P-MaxIP	975.62			20210221-CRE-P140-GPN647-FLAG555-9-P-MaxIP	9	31.86	2.82486
20210221-CRE-P140-GPN647-FLAG555-9-PS-MaxIP	638.61	807.115		20210221-CRE-P140-GPN647-FLAG555-9-PS-MaxIP	8	31.55	2.53566	2.68026
20210221-CRE-P140-GPN647-FLAG555-7-P-MaxIP	363.01			20210221-CRE-P140-GPN647-FLAG555-7-P-MaxIP	10	31.97	3.12793
20210221-CRE-P140-GPN647-FLAG555-7-P1-MaxIP	353.68			20210221-CRE-P140-GPN647-FLAG555-7-P1-MaxIP	5	35.05	1.42653
20210221-CRE-P140-GPN647-FLAG555-7-S-MaxIP	359.09			20210221-CRE-P140-GPN647-FLAG555-7-S-MaxIP	8	32.88	2.43309
20210221-CRE-P140-GPN647-FLAG555-7-T-MaxIP	271.27			20210221-CRE-P140-GPN647-FLAG555-7-T-MaxIP	4	32.25	1.24031
20210221-CRE-P140-GPN647-FLAG555-7-P-MaxIP	378.8			20210221-CRE-P140-GPN647-FLAG555-7-P-MaxIP	12	32.14	3.73367
20210221-CRE-P140-GPN647-FLAG555-7-P1-MaxIP	343.52	344.895		20210221-CRE-P140-GPN647-FLAG555-7-P1-MaxIP	4	35.77	1.11826	2.17996
20210221-CRE-P140-GPN647-FLAG555-8-F-MaxIP	572.58			20210221-CRE-P140-GPN647-FLAG555-8-F-MaxIP	7	33.76	2.07346
20210221-CRE-P140-GPN647-FLAG555-8-P-MaxIP	813.46	693.02		20210221-CRE-P140-GPN647-FLAG555-8-P-MaxIP	12	31.99	3.75117	2.91232
GFP + Vector				GFP + Vector
MAX_2021.09.13-V-V-GPN555-11-T-1.nd2:0001-0512-0657	438.142			MAX_2021.09.13-V-V-GPN555-11-T-1.nd2	36	37.737	9.53971
MAX_2021.09.13-V-V-GPN555-11-S1-1.nd2:0001-0553-0598	472.949			MAX_2021.09.13-V-V-GPN555-11-S1-1.nd2	21	37.498	5.6003
MAX_2021.09.13-V-V-GPN555-11-S-1.nd2:0001-0491-0566	493.895			MAX_2021.09.13-V-V-GPN555-11-S-1.nd2	14	41.742	3.35394
MAX_2021.09.13-V-V-GPN555-11-P2-1.nd2:0001-0512-0593	468.281			MAX_2021.09.13-V-V-GPN555-11-P2-1.nd2	20	67.497	2.96309
MAX_2021.09.13-V-V-GPN555-11-P1-1.nd2:0001-0437-0512	419.557			MAX_2021.09.13-V-V-GPN555-11-P1-1.nd2	8	34.375	2.32727
MAX_2021.09.13-V-V-GPN555-11-P-1.nd2:0001-0512-0643	580.472			MAX_2021.09.13-V-V-GPN555-11-P-1.nd2	29	31.527	9.19846
MAX_2021.09.13-V-V-GPN555-11-F-1.nd2:0001-0465-0586	540.78	487.725		MAX_2021.09.13-V-V-GPN555-11-F-1.nd2	9	38.613	2.33082	5.0448
MAX_2021.09.13-V-V-GPN555-10-T1-1.nd2:0001-0512-0625	458.193			MAX_2021.09.13-V-V-GPN555-10-T1-1.nd2	8	36.114	2.21521
MAX_2021.09.13-V-V-GPN555-10-T-1.nd2:0001-0564-0566	544.811			MAX_2021.09.13-V-V-GPN555-10-T-1.nd2	10	39.367	2.5402
MAX_2021.09.13-V-V-GPN555-10-T1-1.nd2:0001-0512-0623	442.732			MAX_2021.09.13-V-V-GPN555-10-T1-1.nd2	6	38.995	1.53866
MAX_2021.09.13-V-V-GPN555-10-S1-1.nd2:0001-0415-0512	453.495			MAX_2021.09.13-V-V-GPN555-10-S1-1.nd2	19	31.78	5.9786
MAX_2021.09.13-V-V-GPN555-10-P1-1.nd2:0001-0512-0549	566.062			MAX_2021.09.13-V-V-GPN555-10-P1-1.nd2	16	36.425	4.39259
MAX_2021.09.13-V-V-GPN555-10-F-1.nd2:0001-0512-0562	480.841	491.022		MAX_2021.09.13-V-V-GPN555-10-F-1.nd2	17	41.003	4.14604	3.46855
MAX_2021.09.13-V-V-GPN555-9-P-1.nd2:0001-0512-0424	323.488			MAX_2021.09.13-V-V-GPN555-9-P-1.nd2	4	32.941	1.21429
MAX_2021.09.13-V-V-GPN555-9-C-1.nd2:0001-0387-0413	249.397			MAX_2021.09.13-V-V-GPN555-8-P-1.nd2	19	32.34	5.87508	3.54468
MAX_2021.09.13-V-V-GPN555-8-P-1.nd2:0001-0512-0534	349.374	307.42		MAX_2021.09.13-V-V-GPN555-7-T-1.nd2	8	40.324	1.98393
MAX_2021.09.13-V-V-GPN555-7-T-1.nd2:0001-0539-0526	537.07			MAX_2021.09.13-V-V-GPN555-7-S-1.nd2	2	31.15	0.642055
MAX_2021.09.13-V-V-GPN555-7-S-1.nd2:0001-0533-0512	300.998			MAX_2021.09.13-V-V-GPN555-7-P-1.nd2	6	39.303	1.5266	1.3842
MAX_2021.09.13-V-V-GPN555-7-P-1.nd2:0001-0539-0526	331.887	389.985		MAX_2021.09.13-V-V-GPN555-6-T-1.nd2	9	32.112	2.80269
MAX_2021.09.13-V-V-GPN555-6-T-1.nd2:0001-0512-0582	435.511			MAX_2021.09.13-V-V-GPN555-6-S2-1.nd2	11	41.146	2.67341
MAX_2021.09.13-V-V-GPN555-6-S2-1.nd2:0001-0505-0491	396.672			MAX_2021.09.13-V-V-GPN555-6-S1-1.nd2	20	31.787	6.29188
MAX_2021.09.13-V-V-GPN555-6-S1-1.nd2:0001-0478-0512	470.867			MAX_2021.09.13-V-V-GPN555-6-P1-1.nd2	16	31.738	5.04128
MAX_2021.09.13-V-V-GPN555-6-P1-1.nd2:0001-0512-0509	572.803			MAX_2021.09.13-V-V-GPN555-6-P-1.nd2	28	42.491	6.58963
MAX_2021.09.13-V-V-GPN555-6-P-1.nd2:0001-0500-0541	475.537			MAX_2021.09.13-V-V-GPN555-6-F-1.nd2	10	31.199	3.20523
MAX_2021.09.13-V-V-GPN555-6-F-1.nd2:0001-0436-0512	580.963			MAX_2021.09.13-V-V-GPN555-6-S-1.nd2	14	42.81	3.27026	4.26777
MAX_2021.09.13-V-V-GPN555-6-S-1.nd2:0001-0512-0416	461.858	488.726		MAX_2021.09.13-V-V-GPN555-5-T1-1.nd2	4	36.399	1.09893
MAX_2021.09.13-V-V-GPN555-5-T1-1.nd2:0001-0611-0607	361.601			MAX_2021.09.13-V-V-GPN555-5-T-1.nd2	6	33.571	1.78726
MAX_2021.09.13-V-V-GPN555-5-T-1.nd2:0001-0628-0512	379.459			MAX_2021.09.13-V-V-GPN555-5-F-1.nd2	4	31.325	1.27694
MAX_2021.09.13-V-V-GPN555-5-S-1.nd2:0001-0573-0512	453.814			MAX_2021.09.13-V-V-GPN555-5-S-1.nd2	13	40.498	3.21004
MAX_2021.09.13-V-V-GPN555-5-P-1.nd2:0001-0522-0556	399.535	398.602		MAX_2021.09.13-V-V-GPN555-5-P-1.nd2	24	40.063	5.99056	2.67274
MAX_2021.09.13-V-V-GPN555-3-S-1.nd2:0001-0512-0476	383.963			MAX_2021.09.13-V-V-GPN555-3-S-1.nd2	13	41.976	3.09701
MAX_2021.09.13-V-V-GPN555-3-T-1.nd2:0001-0512-0634	558.452			MAX_2021.09.13-V-V-GPN555-3-T-1.nd2	18	30.734	5.85671
MAX_2021.09.13-V-V-GPN555-3-P1-1.nd2:0001-0472-0663	594.067			MAX_2021.09.13-V-V-GPN555-3-P1-1.nd2	9	40.276	2.23458
MAX_2021.09.13-V-V-GPN555-3-C-1.nd2:0001-0371-0586	533.41			MAX_2021.09.13-V-V-GPN555-3-P-1.nd2	14	31.045	4.50958	3.92447
MAX_2021.09.13-V-V-GPN555-3-P-1.nd2:0001-0411-0512	480.759	510.13		MAX_2021.09.13-V-V-GPN555-2-S1-1.nd2	12	42.278	2.83836
MAX_2021.09.13-V-V-GPN555-2-S1-1.nd2:0001-0556-0512	332.933			MAX_2021.09.13-V-V-GPN555-2-S-1.nd2	7	40.882	1.71224
MAX_2021.09.13-V-V-GPN555-5-F-1.nd2:0001-0493-0512	382.533			MAX_2021.09.13-V-V-GPN555-2-P-1.nd2	5	32.055	1.55982
MAX_2021.09.13-V-V-GPN555-2-S-1.nd2:0001-0565-0512	322.748			MAX_2021.09.13-V-V-GPN555-2-P1-1.nd2	11	39.85	2.76035
MAX_2021.09.13-V-V-GPN555-2-P2-1.nd2:0001-0491-0512	339.728	344.486		MAX_2021.09.13-V-V-GPN555-2-P2-1.nd2	7	41.149	1.70113	2.11438
MAX_2021.09.13-V-V-GPN555-1-P1-1.nd2:0001-0512-0512	316.085			MAX_2021.09.13-V-V-GPN555-1-P1-1.nd2	23	42.587	5.40071
MAX_2021.09.13-V-V-GPN555-1-P-1.nd2:0001-0457-0558	553.283			MAX_2021.09.13-V-V-GPN555-1-P-1.nd2	44	52.789	8.33507	6.86789
MAX_2021.09.13-V-V-GPN555-1-C-1.nd2:0001-0508-0647	301.79	390.386
MAX_2021.09.13-V-V-GPN555-2-P-1.nd2:0001-0413-0512	337.337
MAX_2021.09.13-V-V-GPN555-2-P1-1.nd2:0001-0561-0546	369.169	353.253
GFP-2A-Cre +p140cap				GFP-2A-Cre +p140cap
MAX_2021.09.13-P140-8-S-1.nd2:0001-0510-0389	607.701			MAX_2021.09.13-P140-8-S-1.nd2:0001-0510-0389	24	38.013	6.31363
MAX_2021.09.13-P140-8-P1-1.nd2:0001-0512-0418	575.486			MAX_2021.09.13-P140-8-P1-1.nd2:0001-0512-0418	14	33.154	4.22272
MAX_2021.09.13-P140-8-P-1.nd2:0001-0471-0512	463.951	549.046		MAX_2021.09.13-P140-8-P-1.nd2:0001-0471-0512	15	39.977	3.75216	4.76284
MAX_2021.09.13-P140-7-T-1.nd2:0001-0512-0400	487.317			MAX_2021.09.13-P140-7-T-1.nd2:0001-0512-0400	13	36.518	3.55989
MAX_2021.09.13-P140-7-S-1.nd2:0001-0512-0400	353.381	420.349		MAX_2021.09.13-P140-7-S-1.nd2:0001-0512-0400	6	42.069	1.42623	2.49306
MAX_2021.09.13-P140-5-T-1.nd2:0001-0559-0666	639.512			MAX_2021.09.13-P140-5-T-1.nd2:0001-0559-0666	8	34.898	2.29239
MAX_2021.09.13-P140-5-S-1.nd2:0001-0512-0781	559.792			MAX_2021.09.13-P140-5-S-1.nd2:0001-0512-0781	8	32.336	2.47402
MAX_2021.09.13-P140-5-P1-1.nd2:0001-0553-0553	536.941			MAX_2021.09.13-P140-5-P1-1.nd2:0001-0553-0553	10	38.224	2.61616
MAX_2021.09.13-P140-5-P-1.nd2:0001-0512-0574	423.245	539.872		MAX_2021.09.13-P140-5-P-1.nd2:0001-0512-0574	12	31.528	3.80614	2.79718
MAX_2021.09.13-P140-3-P-1.nd2:0001-0503-0512	592.702			MAX_2021.09.13-P140-3-P-1.nd2:0001-0503-0512	11	40.74	2.70005
MAX_2021.09.13-P140-4-T-1.nd2:0001-0444-0512	500.849			MAX_2021.09.13-P140-4-T-1.nd2:0001-0444-0512	13	44.333	2.93235
MAX_2021.09.13-P140-4-F-1.nd2:0001-0485-0512	354.149			MAX_2021.09.13-P140-4-F-1.nd2:0001-0485-0512	8	31.618	2.5302
MAX_2021.09.13-P140-4-P1-1.nd2:0001-0514-0512	644.608			MAX_2021.09.13-P140-4-P1-1.nd2:0001-0514-0512	8	42.289	1.89174	2.45143
MAX_2021.09.13-P140-4-S-1.nd2:0001-0519-0512	486.609	496.554		MAX_2021.09.13-P140-4-S-1.nd2:0001-0519-0512	9	32.963	2.73033
MAX_2021.09.13-P140-2-P-1.nd2:0001-0512-0602	479.479			MAX_2021.09.13-P140-2-P-1.nd2:0001-0512-0602	15	30.953	4.84606
MAX_2021.09.13-P140-2-P1-1.nd2:0001-0512-0620	352.159			MAX_2021.09.13-P140-2-P1-1.nd2:0001-0512-0620	4	39.718	1.0071	2.86116
MAX_2021.09.13-P140-2-S-1.nd2:0001-0420-0512	259.306	363.648		MAX_2021.09.13-P140-2-S-1.nd2:0001-0420-0512	4	35.897	1.1143
MAX_2021.09.13-P140-1-P-1.nd2:0001-0553-0642	275.261			MAX_2021.09.13-P140-1-P-1.nd2:0001-0553-0642	2	49.869	0.401051
MAX_2021.09.13-P140-1-S-1.nd2:0001-0512-0620	359.282			MAX_2021.09.13-P140-1-S-1.nd2:0001-0512-0620	14	41.347	3.38598
MAX_2021.09.13-P140-1-P1-1.nd2:0001-0465-0512	467.977	367.507		MAX_2021.09.13-P140-1-P1-1.nd2:0001-0465-0512	4	31.987	1.25051	1.53796

## Sheet: Fig 7B_normalize
Mean intensity																					number
GFP_Vector	GFP-2A-Cre + Vector	GFP-2A-Cre + EndoA1	GFP-2A-Cre + KKK-EEE	GFP-2A-Cre + Y343A	GFP-2A-Cre +p140cap	Average	GFP_Vector	GFP-2A-Cre + Vector	GFP-2A-Cre + EndoA1	GFP-2A-Cre + KKK-EEE	GFP-2A-Cre + Y343A	GFP-2A-Cre +p140cap		GFP_Vector	GFP-2A-Cre + Vector	GFP-2A-Cre + EndoA1	GFP-2A-Cre + KKK-EEE	GFP-2A-Cre + Y343A	GFP-2A-Cre +p140cap		GFP_Vector	GFP-2A-Cre + Vector	GFP-2A-Cre + EndoA1	GFP-2A-Cre + KKK-EEE	GFP-2A-Cre + Y343A	GFP-2A-Cre +p140cap		GFP_Vector	GFP-2A-Cre + Vector	GFP-2A-Cre + EndoA1	GFP-2A-Cre + KKK-EEE	GFP-2A-Cre + Y343A	GFP-2A-Cre +p140cap	GFP_Vector	GFP-2A-Cre + Vector	GFP-2A-Cre + EndoA1	GFP-2A-Cre + KKK-EEE	GFP-2A-Cre + Y343A	GFP-2A-Cre +p140cap
802.849	445.972	671.668	670.311	528.691		572.871	1.40145	0.778486	1.17246	1.17009	0.922879			1.40145	0.778486	1.05143	1.17009	0.922879	1.31927		14.9484	11.2932	13.5047	14.5676	7.05386		11.7977	1.26707	0.957243	1.1447	1.23478	0.597903		1.26707	0.957243	1.14101	1.23478	0.597903	1.28766
642.245	440.022	602.333	503.921	528.323		572.871	1.1211	0.7681	1.05143	0.879642	0.922237			1.10991	0.749736	0.942881	0.879642	0.922237	1.29723		13.6928	9.67077	13.4613	9.46304	6.2946		11.7977	1.16064	0.819719	1.14101	0.802111	0.533546		1.08026	0.802819	1.08248	0.80211	0.533546	0.773532
635.835	429.502	540.149	394.105	523.889		572.871	1.10991	0.749736	0.942881	0.687947	0.914497			0.954599	0.732197	0.927695	0.687947	0.914497	1.19314		12.7446	9.4714	12.7707	5.9354	6.16981		11.7977	1.08026	0.802819	1.08248	0.503099	0.522968		1.05391	0.70378	0.880798	0.503099	0.522968	0.756233
626.241	420.682	531.45	388.772	448.648		572.871	1.09316	0.73434	0.927695	0.678638	0.783157			0.76945	0.598326	0.865301	0.678638	0.783157	1.01003		12.5901	8.38359	10.3914	5.50634	5.09946		11.7977	1.06717	0.710614	0.880798	0.466731	0.432243		0.785414	0.375914	0.856697	0.466731	0.432243	0.674012
546.862	419.454	495.706	362.753	416.967		572.871	0.954599	0.732197	0.865301	0.63322	0.727855			1.28095	1.1106	0.85573	0.63322	0.727855	0.883061		12.4337	8.30296	10.107	4.68444	4.88001		11.7977	1.05391	0.70378	0.856697	0.397065	0.413641		1.41537	1.36737	0.839203	0.397065	0.413641	0.662759
525.116	386.065	490.223	323.969			572.871	0.91664	0.673912	0.85573	0.565518				1.11434	0.981894	0.836908	0.565518	0.987293	0.873789		11.1447	7.13942	9.90065	4.68267			11.7977	0.944654	0.605155	0.839203	0.396915			1.19229	0.958708	0.657472	0.396915	1.03215	0.415796
470.717	342.764	479.44	298.33			572.871	0.76945	0.598326	0.836908	0.520763				1.05325	0.928378	0.759754	0.520763	0.904	1.2865		9.26605	4.43491	7.75664	4.57559			11.7977	0.785414	0.375914	0.657472	0.387838			1.10806	0.871767	0.642348	0.387838	0.949581	1.18582
465.178		435.241	649.178			572.871	1		0.759754	1.1332				1.02055	0.863012	0.753147	1.1332	0.870108	1.11665		7.56101		7.57821				11.7977	0.64089		0.642348				0.975431	0.787671	0.539906	0.989893	0.930374	1.06491
440.796		431.456				572.871			0.753147					0.953951	0.814275	1.32985	1.03259	0.845881	1.00631		11.7977		6.36964				11.7977			0.539906				0.890367	0.673202	1.38528	0.74718	0.858434	0.912948
572.871		408.377				572.871			0.71286					0.910512	0.740886	1.31405	0.998805	0.830744	1.002		11.7977		5.09723				11.7977			0.432054				0.827774	0.468651	1.36482	0.732016	0.772039	0.911772
														0.846044	0.822184	1.24057	0.980837	0.806639	0.769921															0.794034		1.30645	0.618009	0.715155	0.838476
														1.22576	0.809185	1.03804	0.874667	0.778623	0.745225															1.85677	1.07752	1.30125	0.557847	0.686251	0.783142
														1.17433	0.782945	1.02195	0.596425	0.736331	0.512099															1.15382	1.04657	1.12891	0.438095	0.520189	0.768442
														0.957779	0.708264	0.993458	1.30501	0.702462	0.425994															0.958326	1.02518	1.12889	0.856802	1.56033	0.65543
														0.937073	0.650482	0.97183	1.28872	1.31503	0.860617															0.722592	0.77871	1.04989	0.856464	0.843447	0.411875
536.894	465.492	701.798	432.794	378.899		419.136	1.28095	1.1106	1.67439	1.03259	0.904			0.827745	0.563006	1.48409	1.19903	1.14427	0.850023		7.23595	6.99054	8.90398	5.06074	5.27677		5.11241	1.41537	1.36737	1.74164	0.989893	1.03215		0.374225	0.532767	1.19638	0.746571	0.81684	0.934357
492.962	438.408	557.388	418.635	364.693		419.136	1.17614	1.04598	1.32985	0.998805	0.870108			1.13016	0.543072	1.14451	0.870888	0.997218	0.791682		6.78853	6.1856	7.0821	3.81989	4.85465		5.11241	1.32785	1.20992	1.38528	0.74718	0.949581		1.58831	0.448015	1.19511	0.716585	0.651957	0.550962
467.06	411.547	550.765	411.104	354.539		419.136	1.11434	0.981894	1.31405	0.980837	0.845881			1.05965	0.932192	1.0889	0.807992	0.891039	0.578223		6.09547	4.90131	6.9775	3.74237	4.75646		5.11241	1.19229	0.958708	1.36482	0.732016	0.930374		1.25092	0.810085	1.14113	0.667855	0.553324	0.544382
452.913	394.674	519.967	366.604	348.195		419.136	1.08059	0.941638	1.24057	0.874667	0.830744			1.02878	0.673982	1.07837	0.780149	0.799251	0.537308		5.94523	4.54017	6.67913	3.15951	4.38867		5.11241	1.1629	0.888067	1.30645	0.618009	0.858434		0.992941	0.586964	1.07618	0.548809	0.551296	0.501005
441.457	389.117	435.082	249.983	338.091		419.136	1.05325	0.928378	1.03804	0.596425	0.806639			0.932743	0.617334	0.972153	0.751448	0.660713	0.519197		5.66487	4.45683	6.65253	2.85194	3.94698		5.11241	1.10806	0.871767	1.30125	0.557847	0.772039		0.972606	0.528492	1.03026	0.407054	0.544971	0.462582
441.102	380.417	428.337		326.349		419.136	1.05241	0.907622	1.02195		0.778623			0.927564	0.551201	0.940927	0.72824	0.639119	0.500527		5.51385	4.36165	5.77145	2.23972	3.65617		5.11241	1.07852	0.85315	1.12891	0.438095	0.715155		0.932285	0.421946	0.982211	0.318291	0.46191	0.447813
427.75	361.719	416.394		308.623		419.136	1.02055	0.863012	0.993458		0.736331			0.911232	0.510405	0.910701	0.695685	0.622489	0.48543		4.9868	4.0269	5.77137		3.5084		5.11241	0.975431	0.787671	1.12889		0.686251		0.792299	0.391556	0.855369	1.03593	0.40201	0.447175
419.82	345.485	407.329		294.427		419.136	1.00163	0.824279	0.97183		0.702462			0.544349	0.435859	0.865279	0.902318	0.555826	0.464253		4.79244	3.72153	5.36747		2.65942		5.11241	0.937412	0.727939	1.04989		0.520189		0.790824	0.199102	0.762231	0.215416	0.326907	0.439415
399.835	341.292	382.376				419.136	0.953951	0.814275	0.912296					1.25252	0.857613	0.929913	0.882283	0.752379	0.75623		4.55192	3.44168	5.09321				5.11241	0.890367	0.673202	0.996244				0.679811	0.924676	1.16559	0.656314	0.322712	0.407488
386.933	329.954					419.136	0.923168	0.787225						1.15546	0.750868	0.896269	0.815695	0.713086	0.430771		4.35805	2.8563					5.11241	0.852445	0.5587					1.34678	0.492893	1.07017	0.513529	0.608044	0.327759
381.628	310.532					419.136	0.910512	0.740886						0.592025	0.665387	0.881712	0.705593	0.420048	0.684902		4.23192	2.39594					5.11241	0.827774	0.468651					1.07035	0.442307	1.0259	0.226767	0.942053	0.304995
373.703						419.136	0.891604							1.32158	0.656455	0.807494	0.634462	1.10694	0.52003		4.05943						5.11241	0.794034						0.582871	0.372623	0.97357	0.861152	0.239149	0.291058
354.607						419.136	0.846044							0.879337	0.653106	0.789413	0.6329	0.240822	0.529687		3.82469						5.11241	0.748119						1.07868	0.336956	0.942493	0.563748	0.461968	0.912948
291.239						419.136	0.694856							0.995846	0.648155	0.76599	0.517942	0.348828	0.708229		3.5246						5.11241	0.689421						0.970267	0.245285	0.925676	0.208087	0.800601	0.911772
419.136						419.136								0.922484	0.802335	0.74533	0.461053	0.740256	0.353331		5.11241													1.28676	0.44053	0.92153	0.575441	1.67247	0.838476
														1.47607	0.431167	0.735596		0.822108	0.452766															0.772555	0.32349	0.841075			0.783142
														1.35823	0.609979	0.72913																		1.57821	0.409524	0.828109			0.768442
														1.01904	0.444528	0.723039																		0.849024	0.247038	0.758118			0.65543
656.902	368.533	734.544	584.952	589.445	576.655	448.237	1.46552	0.822184	1.63874	1.30501	1.31503	1.2865		0.956356	0.427724	0.671067					5.71538	6.10646	6.96337	5.06074	5.61468	4.26704	3.5984	1.58831	1.69699	1.93513	1.40639	1.56033	1.18582	0.912489	0.277456	1.1388
506.58	362.707	665.226	577.652	512.905	500.526	448.237	1.13016	0.809185	1.48409	1.28872	1.14427	1.11665		0.778008	0.496016	0.961925					4.50131	3.87734	6.27969	3.81989	3.03506	3.83197	3.5984	1.25092	1.07752	1.74513	1.06155	0.843447	1.06491	1.21846	0.352274	1.72058
474.975	350.945	513.01	537.452	446.99	451.066	448.237	1.05965	0.782945	1.14451	1.19903	0.997218	1.00631		0.937779	0.638673	1.32269					3.573	3.76598	4.86234	3.74237	2.93932	3.28515	3.5984	0.992941	1.04657	1.35125	1.04001	0.81684	0.912948	0.882247	0.465118	0.714179
461.135	317.47	488.083	390.364	399.397	449.135	448.237	1.02878	0.708264	1.0889	0.870888	0.891039	1.002		1.00926	0.758684	0.574122					3.49982	3.689	4.30507	3.15951	2.346	3.28092	3.5984	0.972606	1.02518	1.19638	0.878033	0.651957	0.911772	0.935243	0.650227	1.34797
418.09	291.57	483.365	362.172		345.107	448.237	0.932743	0.650482	1.07837	0.807992		0.769921		0.906597	0.79464	1.28957					3.35473	2.80211	4.30049	2.85194		3.01717	3.5984	0.932285	0.77871	1.19511	0.792559		0.838476	0.792962	0.512378	1.64345
415.769	252.36	435.755	349.692		334.037	448.237	0.927564	0.563006	0.972153	0.780149		0.745225		0.961943	0.691053	1.02625					2.85101	1.91711	4.10625	2.23972		2.81806	3.5984	0.792299	0.532767	1.14113	0.622422		0.783142	0.675879	0.159081	1.34757
408.448	243.425	421.758	336.827		229.542	448.237	0.911232	0.543072	0.940927	0.751448		0.512099		1.06726	0.686685	1.09813					2.8457	1.61214	3.87252			2.76516	3.5984	0.790824	0.448015	1.07618			0.768442	1.50023	0.311635	1.55149
243.998		408.21	326.424		190.946	448.237	0.544349		0.910701	0.72824		0.425994		1.05494	0.771053	1.31473					2.44623		3.7073			2.3585	3.5984	0.679811		1.03026			0.65543	1.10042	0.278478
448.237		387.85	311.832			448.237	1		0.865279	0.695685					0.797477						3.5984		3.53439			1.48209	3.5984	1		0.982211			0.411875	0.863405	0.441345
		374.612				448.237			0.835745						0.75176								3.07796				3.5984			0.855369				0.860067	0.484704
		295.83				448.237			0.659986						0.837327								2.74281				3.5984			0.762231					0.402711
															1.10935																				0.541874
863.065	739.69	725.528		550.735		689.064	1.25252	1.07347	1.05292		0.799251				0.748881						7.20496	4.64655	8.15787		2.96016	4.99859	5.34977	1.34678	0.868553	1.5249		0.553324	0.934357
796.184	642.34	644.334		455.273		689.064	1.15546	0.932192	0.935086		0.660713										5.72611	4.33377	7.11815		2.94931	2.94752	5.34977	1.07035	0.810085	1.33055		0.551296	0.550962
407.943	524.17	640.77		440.394		689.064	0.592025	0.760698	0.929913		0.639119										3.11823	3.42928	6.6532		2.91547	2.91232	5.34977	0.582871	0.641015	1.24364		0.544971	0.544382
689.064	464.417	617.587		428.935	593.02	689.064	1	0.673982	0.896269		0.622489	0.860617									5.34977	3.14012	6.26223		2.47111	2.68026	5.34977	1	0.586964	1.17056		0.46191	0.501005
	437.077	607.556		383	585.72	689.064		0.634305	0.881712		0.555826	0.850023										2.94294	6.23562		2.15066	2.47471	5.34977		0.550106	1.16559		0.40201	0.462582
	425.382	556.415		518.438	545.52	689.064		0.617334	0.807494		0.752379	0.791683										2.82731	5.72514		1.74888	2.3957	5.34977		0.528492	1.07017		0.326907	0.447813
	413.925	543.956		491.362	398.433	689.064		0.600706	0.789413		0.713086	0.578223										2.81154	5.48833		1.72644	2.39228	5.34977		0.525545	1.0259		0.322712	0.447175
	379.812	527.816			370.24	689.064		0.551201	0.76599			0.537308										2.25731	5.20837			2.35077	5.34977		0.421946	0.97357			0.439415
	354.723	513.58			357.76	689.064		0.51479	0.74533			0.519197										2.17074	5.04212			2.17996	5.34977		0.405763	0.942493			0.407488
	351.702	506.873			344.895	689.064		0.510405	0.735596			0.500527										2.09473	4.95215			1.75343	5.34977		0.391556	0.925676			0.327759
	335.855	502.418			334.493	689.064		0.487407	0.72913			0.48543										2.08315	4.92997			1.63165	5.34977		0.389391	0.92153			0.304995
	300.335	498.22			319.9	689.064		0.435859	0.723039			0.464253										1.06515	4.49955			1.55709	5.34977		0.199102	0.841075			0.291058
		462.408				689.064			0.671067														4.43019				5.34977			0.828109
		433.337				689.064			0.628877														4.05576				5.34977			0.758118
		413.615				689.064			0.600256														3.30453				5.34977			0.617695
		373.87				689.064			0.542577														3.26268				5.34977			0.609874
																							2.97959				5.34977			0.556957
																							2.48052				5.34977			0.46367
923.594			630.591			698.857	1.32158			0.902318
707.428			616.59			698.857	1.01226			0.882283											9.08626			7.21727			8.4235	1.07868			0.856802
614.531			570.054			698.857	0.879337			0.815695											8.84378			7.21443			8.4235	1.04989			0.856464
549.876			493.109			698.857	0.786822			0.705593											8.17304			6.28874			8.4235	0.970267			0.746571
698.857			443.398			698.857	1			0.634462											7.59092			6.03615			8.4235	0.90116			0.716585
			442.307			698.857				0.6329											8.4235			5.62567			8.4235	1			0.667855
			361.968			698.857				0.517942														4.62289			8.4235
			322.21			698.857				0.461053														3.42882
																								2.68112
591.126	406.952					474.517	1.24574	0.857613													5.50871	3.31322					3.58311	1.53741	0.924676
472.546	356.3					474.517	0.995846	0.750868													4.6106	1.76609					3.58311	1.28676	0.492893
446.955	315.738					474.517	0.941916	0.665387													2.79965	1.58483					3.58311	0.781345	0.442307
437.735	311.5					474.517	0.922484	0.656455													2.76815	1.33515					3.58311	0.772555	0.372623
424.225	309.91					474.517	0.894014	0.653106													2.22845	1.20735					3.58311	0.621931	0.336956
474.517	307.561					474.517	1	0.648155													3.58311	0.878882					3.58311	1	0.245285
771.681						719.151	1.07304														8.76921						6.02483	1.45551
764.307						719.151	1.06279														5.82388						6.02483	0.966647
696.808						719.151	0.968932														5.56193						6.02483	0.923168
645.62						719.151	0.897753														3.99144						6.02483	0.662499
717.34						719.151	0.997481														5.97768						6.02483	0.992174
719.151						719.151	1														6.02483						6.02483
																											6.02483
724.08	570.1	683.497		298.466	537.34	710.551	1.01904	0.802335	0.961925		0.420048	0.75623									5.31998	1.92343	4.97219		2.65482	4.52302	4.36617	1.21846	0.44053	1.1388		0.608044	1.03593
783.79	306.366	939.838		786.54	306.085	710.551	1.10307	0.431167	1.32269		1.10694	0.430771									3.7724	1.41241	7.51233		4.11316	0.94054	4.36617	0.864007	0.32349	1.72058		0.942053	0.215416
679.54	433.421	407.943		171.117	486.658	710.551	0.956356	0.609979	0.574122		0.240822	0.684902									3.85204	1.78805	3.11823		1.04417	2.86557	4.36617	0.882247	0.409524	0.714179		0.239149	0.656314
774.805	315.86			247.86	369.508	710.551	1.09043	0.444528			0.348828	0.52003									4.6248	1.07861			2.01703	2.24215	4.36617	1.05924	0.247038			0.461968	0.513529
552.815	303.92			525.99	376.37	710.551	0.778008	0.427724			0.740256	0.529687									4.08342	1.21142			3.49556	0.990103	4.36617	0.935243	0.277456			0.800601	0.226767
792.49	352.445			584.15	503.233	710.551	1.11532	0.496016			0.822108	0.708229									5.44831	1.53808			7.30227	3.75993	4.36617	1.24785	0.352274			1.67247	0.861152
666.34	453.81				251.06	710.551	0.937779	0.638673				0.353331									3.4622	2.03078				2.46141	4.36617	0.792962	0.465118				0.563748
710.551					321.713	710.551	1					0.452766									4.36617	4.07546				0.90854	4.36617	1	0.93342				0.208087
																										2.51247
426.986	320.974	545.576				423.067	1.00926	0.758684	1.28957												3.18422	3.06337	6.35061				4.71123	0.675879	0.650227	1.34797
383.552	336.187	434.171				423.067	0.906597	0.79464	1.02625												7.06793	2.41393	7.74268				4.71123	1.50023	0.512378	1.64345
406.967	292.362	464.585				423.067	0.961943	0.691053	1.09813												5.18433	0.749467	6.34873				4.71123	1.10042	0.159081	1.34757
451.521	290.514	556.218				423.067	1.06726	0.686685	1.31473												4.0677	1.46818	7.30944				4.71123	0.863405	0.311635	1.55149
446.312	326.207					423.067	1.05494	0.771053													4.05197	1.31198					4.71123	0.860067	0.278478
423.067	337.387					423.067	1	0.797477													4.71123	2.07928					4.71123	1	0.441345
	318.045					423.067		0.75176														2.28355					4.71123		0.484704
	354.246					423.067		0.837327														1.89726					4.71123		0.402711
	469.332					423.067		1.10935														2.55289					4.71123		0.541874
	316.827					423.067		0.748881														1.09538					4.71123		0.232503
510.13					549.046	416.173	1.22576					1.31927									6.86789					4.76284	3.69883	1.85677					1.28766
491.022					539.872	416.173	1.17985					1.29723									5.0448					2.86116	3.69883	1.36389					0.773532
488.726					496.554	416.173	1.17433					1.19314									4.26777					2.79718	3.69883	1.15382					0.756233
487.725					420.349	416.173	1.17193					1.01003									3.92447					2.49306	3.69883	1.061					0.674012
398.602					367.507	416.173	0.957779					0.883061									3.54468					2.45143	3.69883	0.958326					0.662759
390.386					363.648	416.173	0.938037					0.87379									3.46855					1.53796	3.69883	0.937742					0.415796
389.985						416.173	0.937073														2.67274						3.69883	0.722592
353.253						416.173	0.848812														2.11438						3.69883	0.571635
344.486						416.173	0.827745														1.3842						3.69883	0.374225
307.42						416.173	0.738682														3.69883
416.173						416.173	1
