# Supplementary material for: Endophilin A1 facilitates organization of the GABAergic postsynaptic machinery to maintain excitation-inhibition balance
Source: eLife. 2025 Oct 2;13:RP102792. doi: 10.7554/eLife.102792 (PMC12490859; doi:10.7554/eLife.102792)
Supplement: Figure 7—source data 2. [file elife-102792-fig7-data2.xlsx]

## Sheet: Fig 7D_raw data
GFP + Vector				GFP + Vector
Source	mean intensity	mean intensity of per neuron	Source	number	number	length	number of per 10 μm	number of per neuron
MAX_1-P-1.nd2:0001-0512-0487	643.835			MAX_1-P-1.nd2	32	31.525	10.1507
MAX_1-S-1.nd2:0001-0512-0487	520.981			MAX_1-S-1.nd2	27	32.645	8.27079
MAX_1-T-1.nd2:0001-0512-0411	429.701	531.506		MAX_1-T-1.nd2	5	33.931	1.47358	6.63168
MAX_2-P-1.nd2:0001-0423-0512	723.771			MAX_2-P-1.nd2	34	30.237	11.2445
MAX_2-S-1.nd2:0001-0512-0424	455.587			MAX_2-S-1.nd2	26	31.178	8.33921
MAX_2-T-1.nd2:0001-0512-0459	376.006	518.455		MAX_2-T-1.nd2	6	31.395	1.91113	7.16495
MAX_3-P-1.nd2:0001-0285-0512	502.69			MAX_3-P-1.nd2	26	44.368	5.86008
MAX_3-T-1.nd2:0001-0512-0492	580.649	541.669		MAX_3-T-1.nd2	14	32.018	4.37254	5.11631
MAX_4-P-1.nd2:0001-0512-0578	634.896			MAX_4-P-1.nd2	29	31.316	9.26044
MAX_4-S-1.nd2:0001-0512-0489	576.315			MAX_4-S-1.nd2	30	31.747	9.44971
MAX_4-S1-1.nd2:0001-0512-0483	693.021			MAX_4-S1-1.nd2	27	31.27	8.63447
MAX_4-T-1.nd2:0001-0512-0538	554.754	614.746		MAX_4-T-1.nd2	8	43.024	1.85943	7.30101
MAX_5-F-1.nd2:0001-0354-0512	481.138			MAX_5-F-1.nd2	10	48.242	2.07288
MAX_5-P-1.nd2:0001-0498-0512	594.779			MAX_5-P-1.nd2	31	30.195	10.2666
MAX_5-S-1.nd2:0001-0517-0512	658.799			MAX_5-S-1.nd2	36	31.289	11.5056
MAX_5-S1-1.nd2:0001-0465-0512	603.368	584.521		MAX_5-S1-1.nd2	47	31.812	14.7743	9.65486
MAX_6-F-1.nd2:0001-0512-0552	433.306			MAX_6-F-1.nd2	19	31.407	6.04961
MAX_6-P-1.nd2:0001-0512-0471	570.422			MAX_6-P-1.nd2	60	31.011	19.348
MAX_6-S-1.nd2:0001-0512-0665	635.341			MAX_6-S-1.nd2	42	31.561	13.3076
MAX_6-T-1.nd2:0001-0508-0512	651.459	572.632		MAX_6-T-1.nd2	18	31.45	5.72337	11.1071
MAX_7-F-1.nd2:0001-0512-0555	608.067			MAX_7-F-1.nd2	44	31.497	13.9696
MAX_7-F1-1.nd2:0001-0512-0314	671.078			MAX_7-F1-1.nd2	23	31.712	7.25277
MAX_7-P-1.nd2:0001-0467-0512	795.188			MAX_7-P-1.nd2	49	30.154	16.2499
MAX_7-S-1.nd2:0001-0512-0473	600.701			MAX_7-S-1.nd2	24	30.812	7.78917
MAX_7-T-1.nd2:0001-0512-0519	1524.76	839.959		MAX_7-T-1.nd2	43	31.879	13.4885	11.75
MAX_8-P-1.nd2:0001-0450-0512	655.502			MAX_8-P-1.nd2	55	30.823	17.8438
MAX_9-F-1.nd2:0512-0584	414.089			MAX_9-F-1.nd2	19	31.589	6.01475
MAX_9-P-1-1.nd2:0001-0512-0507	542.446			MAX_9-P-1.nd2	53	30.901	17.1515
MAX_9-S-1.nd2:0001-0512-0534	422.599			MAX_9-S-1.nd2	24	31.173	7.69897
MAX_9-T-1.nd2:0001-0495-0512	387.11	484.349		MAX_9-T-1.nd2	18	34.431	5.22785	10.7874
MAX_10-F-1.nd2:0001-0512-0441	553.258			MAX_10-F-1.nd2	26	33.436	7.77605
MAX_10-P-1.nd2:0001-0512-0605	799.721			MAX_10-P-1.nd2	67	30.889	21.6906
MAX_10-S-1.nd2:0001-0512-0441	829.309			MAX_10-S-1.nd2	56	50.885	11.0052
MAX_10-T-1.nd2:0001-0512-0590	850.47	758.189		MAX_10-T-1.nd2	30	48.164	6.22872	11.6751
MAX_11-P-1.nd2:0001-0512-0494	542.645			MAX_11-P-1.nd2	25	31.303	7.98645
MAX_11-P-1.nd2:0001-0512-0532	534.527			MAX_11-P-1.nd2	29	30.49	9.51132
MAX_11-P1-1.nd2:0001-0512-0578	435.884			MAX_11-P1-1.nd2	43	31.654	13.5844
MAX_11-S-1.nd2:0001-0347-0512	454.898			MAX_11-S-1.nd2	21	30.553	6.8733
MAX_11-T-1.nd2:0001-0512-0486	437.72	481.135		MAX_11-T-1.nd2	14	30.623	4.57173	8.50544
GFP-2A-Cre + Vector				GFP-2A-Cre + Vector
MAX_1-P-1.nd2:0001-0510-0636	430.123			MAX_1-P-1.nd2:0001-0510-0636	27	44.53	6.06333
MAX_1-S-1.nd2:0001-0512-0527	337.093			MAX_1-S-1.nd2:0001-0512-0527	9	31.174	2.88702
MAX_1-S1-1.nd2:0001-0619-0512	464.379			MAX_1-S1-1.nd2:0001-0619-0512	16	41.241	3.87963
MAX_1-T-1.nd2:0001-0512-0526	496.093			MAX_1-T-1.nd2:0001-0512-0526	25	60.517	4.13107
MAX_1-T1-1.nd2:0001-0472-0512	397.167	424.971		MAX_1-T1-1.nd2:0001-0472-0512	7	30.213	2.31688	3.85559
MAX_2-P-1.nd2:0001-0512-0528	553.196			MAX_2-P-1.nd2:0001-0512-0528	30	31.544	9.51052
MAX_2-S-1.nd2:0001-0471-0512	585.547			MAX_2-S-1.nd2:0001-0471-0512	16	31.729	5.04271
MAX_2-TS-1.nd2:0001-0278-0512	342.152	493.632		MAX_2-TS-1.nd2:0001-0278-0512	9	35.514	2.53421	5.69581
MAX_3-P-1.nd2:0001-0512-0595	582.469			MAX_3-P-1.nd2:0001-0512-0595	33	47.637	6.92739
MAX_3-S-1.nd2:0001-0413-0512	492.554			MAX_3-S-1.nd2:0001-0413-0512	25	31.303	7.98645
MAX_3-T-1.nd2:0001-0401-0512	519.407	531.477		MAX_3-T-1.nd2:0001-0401-0512	15	30.387	4.93632	6.61672
MAX_4-F-1.nd2:0001-0512-0605	392.628			MAX_4-F-1.nd2:0001-0512-0605	10	42.131	2.37355
MAX_4-F-1.nd2:0001-0512-0606	390.352			MAX_4-F-1.nd2:0001-0512-0606	11	31.797	3.45945
MAX_4-S-1.nd2:0001-0479-0512	445.065			MAX_4-S-1.nd2:0001-0479-0512	24	31.272	7.6746
MAX_4-T-1.nd2:0001-0530-0512	306.521	383.642		MAX_4-T-1.nd2:0001-0530-0512	8	29.996	2.66702	4.04365
MAX_5-P-1.nd2:0001-0519-0512	238.79			MAX_5-P-1.nd2:0001-0519-0512	6	31.713	1.89197
MAX_5-S-1.nd2:0001-0577-0512	394.361			MAX_5-S-1.nd2:0001-0577-0512	20	30.699	6.51487
MAX_5-T-1.nd2:0001-0500-0512	302.274	311.808		MAX_5-T-1.nd2:0001-0500-0512	5	32.68	1.52999	3.31228
MAX_6-F-1.nd2:0001-0512-0608	274.925			MAX_6-F-1.nd2:0001-0512-0608	10	31.746	3.15
MAX_6-F-1.nd2:0001-0512-0592	280.752			MAX_6-F-1.nd2:0001-0512-0592	3	30.818	0.973457
MAX_6-P-1.nd2:0001-0512-0546	384.581			MAX_6-P-1.nd2:0001-0512-0546	11	31.254	3.51955
MAX_6-S-1.nd2:0001-0512-0732	311.971			MAX_6-S-1.nd2:0001-0512-0732	10	30.561	3.27214
MAX_6-T-1.nd2:0001-0512-0635	266.591	303.764		MAX_6-T-1.nd2:0001-0512-0635	12	33.379	3.59507	2.90205
MAX_7-P-1.nd2:0001-0512-0623	452.188			MAX_7-P-1.nd2:0001-0512-0623	47	30.796	15.2617
MAX_7-S-1.nd2:0001-0512-0636	435.149			MAX_7-S-1.nd2:0001-0512-0636	16	34.939	4.57941
MAX_7-S1-1.nd2:0001-0512-0586	465.974			MAX_7-S1-1.nd2:0001-0512-0586	21	30.967	6.78141
MAX_7-T-1.nd2:0001-0512-0583	359.83			MAX_7-T-1.nd2:0001-0512-0583	34	30.331	11.2097
MAX_7-T1-1.nd2:0001-0580-0512	389.073	420.443		MAX_7-T1-1.nd2:0001-0580-0512	12	30.696	3.9093	8.3483
MAX_8-P-1.nd2:0001-0467-0512	353.76			MAX_8-P-1.nd2:0001-0467-0512	31	30.161	10.2782
MAX_8-S-1.nd2:0001-0414-0512	491.856			MAX_8-S-1.nd2:0001-0414-0512	26	31.576	8.2341
MAX_8-T-1.nd2:0001-0512-0634	436.445	427.354		MAX_8-T-1.nd2:0001-0512-0634	15	32.025	4.68384	7.73204
MAX_9-P-1.nd2:0001-0542-0512	261.508			MAX_9-P-1.nd2:0001-0542-0512	4	30.134	1.3274
MAX_9-S-1.nd2:0001-0563-0512	380.511			MAX_9-S-1.nd2:0001-0563-0512	14	30.75	4.55285
MAX_9-T-1.nd2:0001-0512-0625	503.21	381.743		MAX_9-T-1.nd2:0001-0512-0625	10	39.725	2.51731	2.79919
MAX_10-F-1.nd2:0001-0478-0511	375.59			MAX_10-F-1.nd2:0001-0478-0511	20	32.7	6.11621
MAX_10-P-1.nd2:0001-0512-0583	301.658			MAX_10-P-1.nd2:0001-0512-0583	15	30.445	4.92692
MAX_10-S-1.nd2:0001-0512-0582	325.739			MAX_10-S-1.nd2:0001-0512-0582	7	31.174	2.24546
MAX_10-T-1.nd2:0001-0512-0608	398.554	350.385		MAX_10-T-1.nd2:0001-0512-0608	15	39.47	3.80035	4.27224
GFP-2A-Cre + EndoA1				GFP-2A-Cre + Vector
				MAX_1-F-1.nd2	30	30.377	9.87589
				MAX_1-P-1.nd2	60	57.395	10.4539
MAX_1-S-1.nd2:0001-0512-0555	538.249			MAX_1-S-1.nd2	66	31.206	21.1498
MAX_1-T-1.nd2:0001-0537-0512	464.781	532.115		MAX_1-T-1.nd2	32	32.032	9.99001	12.8674
MAX_2-F-1.nd2:0001-0482-0512	636.297			MAX_2-F-1.nd2	47	61.749	7.61146
MAX_2-P-1.nd2:0001-0480-0512	705.659			MAX_2-P-1.nd2	43	30.805	13.9588
MAX_2-S-1.nd2:0001-0467-0512	764.706			MAX_2-S-1.nd2	50	30.276	16.5147
MAX_2-T-1.nd2:0001-0444-0512	658.456	691.279		MAX_2-T-1.nd2	40	30.354	13.1778	12.8157
MAX_3-F-1.nd2:0001-0512-0509	488.438			MAX_3-F-1.nd2	32	31.282	10.2295
MAX_3-P-1.nd2:0001-0512-0534	441.029			MAX_3-P-1.nd2	46	30.912	14.881
MAX_3-S-1.nd2:0001-0512-0439	481.378			MAX_3-S-1.nd2	47	31.46	14.9396
MAX_3-T-1.nd2:0001-0512-0588	579.123	497.492		MAX_3-T-1.nd2	35	31.146	11.2374	12.8219
MAX_5-P-1.nd2:0001-0512-0442	527.851			MAX_5-P-1.nd2	24	33.198	7.22935
MAX_5-S-1.nd2:0001-0512-0549	386.724	457.288		MAX_5-S-1.nd2	16	30.649	5.2204	6.22487
MAX_6-F-1.nd2:0001-0512-0449	439.607			MAX_6-F-1.nd2	18	30.792	5.84567
MAX_6-P-1.nd2:0001-0475-0512	410.894			MAX_6-P-1.nd2	18	30.878	5.82939
MAX_6-S-1.nd2:0001-0512-0425	338.848			MAX_6-S-1.nd2	12	38.781	3.0943
MAX_6-T-1.nd2:0001-0646-0324	387.183	394.133		MAX_6-T-1.nd2	9	43.448	2.07144	4.2102
MAX_7-P-1.nd2:0001-0469-0512	381.031			MAX_7-P-1.nd2	34	31.039	10.954
MAX_7-P1-1.nd2:0001-0512-0471	412.74			MAX_7-P1-1.nd2	20	31.024	6.44662
MAX_7-S-1.nd2:0001-0526-0512	256.936			MAX_7-S-1.nd2	11	30.38	3.6208
MAX_7-T-1.nd2:0001-0454-0512	498.734	387.36		MAX_7-T-1.nd2	24	30.756	7.80336	7.20619
MAX_8-F-1.nd2:0001-0512-0547	468.594			MAX_8-F-1.nd2	16	31.974	5.00407
MAX_8-S-1.nd2:0001-0525-0512	528.331			MAX_8-S-1.nd2	46	30.28	15.1915
MAX_8-S1nd2-1.nd2:0001-0442-0512	590.15			MAX_8-S1nd2-1.nd2	38	30.622	12.4094
MAX_8-T-1.nd2:0001-0512-0614	551.276			MAX_8-T-1.nd2	29	32.744	8.85658
MAX_8-T1-1.nd2:0001-0465-0512	638.232	555.317		MAX_8-T1-1.nd2	47	29.457	15.9555	11.4834
MAX_9-F-1.nd2:0001-0534-0512	495.861			MAX_9-F-1.nd2	32	31.481	10.1649
MAX_9-P-1.nd2:0001-0512-0508	696.551			MAX_9-P-1.nd2	43	30.494	14.1011
MAX_9-S-1.nd2:0001-0512-0550	572.045			MAX_9-S-1.nd2	31	46.258	6.70154
MAX_9-S1-1.nd2:0001-0504-0460	485.158			MAX_9-S1-1.nd2	33	28.042	11.7681
MAX_9-T-1.nd2:0001-0512-0578	514.29	552.781		MAX_9-T-1.nd2	36	31.664	11.3694	10.821		632.781
MAX_10-F-1.nd2:0001-0438-0447	548.47			MAX_10-F-1.nd2	20	37.108	5.38967
MAX_10-P-1.nd2:0001-0512-0433	446.269			MAX_10-P-1.nd2	41	57.872	7.0846
MAX_10-S-1.nd2:0001-0381-0512	428.024	474.254		MAX_10-S-1.nd2	13	30.773	4.22448	5.56625		554.254
MAX_11-F-1.nd2:0001-0516-0508	537.658			MAX_11-F-1.nd2	31	29.706	10.4356
MAX_11-P-1.nd2:0001-0444-0512	525.057			MAX_11-P-1.nd2	39	33.588	11.6113
MAX_11-S-1.nd2:0001-0536-0512	456.659			MAX_11-S-1.nd2	32	31.405	10.1895
MAX_11-T-1.nd2:0001-0527-0512	730.476			MAX_11-T-1.nd2	34	31.622	10.752
MAX_11-T1-1.nd2:0001-0562-0512	673.674	584.705		MAX_11-T1-1.nd2	38	31.177	12.1885	11.0354		664.705
GFP-2A-Cre + aa172-352				GFP-2A-Cre + aa172-352
MAX_1-F-1.nd2:0001-0480-0512	483.968			MAX_1-F-1.nd2	8	31.672	2.52589
MAX_1-p-1.nd2:0001-0480-0512	573.35			MAX_1-p-1.nd2	13	31.285	4.15535
MAX_1-S-1.nd2:0001-0512-0445	598.897			MAX_1-S-1.nd2	24	31.246	7.68098
MAX_1-T-1.nd2:0001-0512-0473	485.117	485.117		MAX_1-T-1.nd2	26	31.515	8.25004	5.65306
MAX_2-P-1.nd2:0001-0455-0512	650.856			MAX_2-P-1.nd2	23	30.443	7.5551
MAX_2-S-1.nd2:0001-0467-0512	621.192			MAX_2-S-1.nd2	25	30.276	8.25737
MAX_2-T-1.nd2:0001-0500-0512	617.156	629.735		MAX_2-T-1.nd2	15	31.369	4.78179	6.86475
MAX_3-P-1.nd2:0001-0470-0512	405.519			MAX_3-P-1.nd2	5	31	1.6129
MAX_3-S-1.nd2:0001-0512-0543	427.166			MAX_3-S-1.nd2	13	31.039	4.18828
MAX_3-T-1.nd2:0001-0512-0481	418.851	417.179		MAX_3-T-1.nd2	11	32.307	3.40483	3.06867
MAX_4-P-1.nd2:0001-0519-0512	536.795			MAX_4-P-1.nd2	26	32.165	8.08332
MAX_4-S-1.nd2:0001-0512-0626	622.301			MAX_4-S-1.nd2	22	30.14	7.29927
MAX_4-T-1.nd2:0001-0512-0516	505.053	554.716		MAX_4-T-1.nd2	17	31.662	5.36921	6.91727
MAX_5-F-1.nd2:0001-0480-0512	351.477			MAX_5-F-1.nd2	7	30.475	2.29696
MAX_5-P-1.nd2:0001-0512-0538	419.593			MAX_5-P-1.nd2	13	30.565	4.25323
MAX_5-S-1.nd2:0001-0512-0519	514.539			MAX_5-S-1.nd2	18	31.25	5.76
MAX_5-T-1.nd2:0001-0557-0512	355.664	410.318		MAX_5-T-1.nd2	6	32	1.875	3.5463
MAX_6-P-1.nd2:0001-0524-0512	315.86			MAX_6-P-1.nd2	6	30.565	1.96303
MAX_6-S1-1.nd2:0001-0512-0488	362.706			MAX_6-S1-1.nd2	8	31.16	2.56739
MAX_6-T-1.nd2:0001-0512-0593	359.506	346.024		MAX_6-T-1.nd2	11	33.054	3.32789	2.61944
MAX_7-P-1.nd2:0001-0512-0444	391.102			MAX_7-P-1.nd2	11	31.519	3.48996
MAX_7-S-1.nd2:0001-0512-0542	475.41			MAX_7-S-1.nd2	15	34.363	4.36516
MAX_7-T-1.nd2:0001-0525-0499	361.163	409.225		MAX_7-T-1.nd2	7	31.159	2.24654	3.36722
MAX_8-F-1.nd2:0001-0512-0559	356.128			MAX_8-F-1.nd2	7	31.699	2.20827
MAX_8-P-1.nd2:0001-0512-0454	544.621			MAX_8-P-1.nd2	19	37.318	5.09138
MAX_8-S-1.nd2:0001-0583-0512	454.13	451.626		MAX_8-S-1.nd2	12	31.013	3.86935	3.723
MAX_4-=F-1.nd2:0001-0454-0512	457.676			MAX_4-=F-1.nd2	8	31.047	2.57674
MAX_4-P-1.nd2:0001-0460-0512	626.241			MAX_4-P-1.nd2	28	31.171	8.98271
MAX_4-S-1.nd2:0001-0578-0512	462.514			MAX_4-S-1.nd2	11	43.455	2.53135
MAX_4-T-1.nd2:0001-0497-0512	397.758	486.047		MAX_4-T-1.nd2	8	31.753	2.51945	4.15256
MAX_5-P-1.nd2:0001-0446-0512	506.767			MAX_5-P-1.nd2	26	32.091	8.10196
MAX_5-S-1.nd2:0001-0512-0436	491.265			MAX_5-S-1.nd2	25	32.055	7.7991
MAX_5-T-1.nd2:0001-0512-0546	514.097	504.043		MAX_5-T-1.nd2	15	31.515	4.75964	6.8869
MAX_6-P-1.nd2:0001-0427-0512	521.118			MAX_6-P-1.nd2	22	39.634	5.55079
MAX_6-S-1.nd2:0001-0435-0512	475.332			MAX_6-S-1.nd2	6	31.899	1.88094
MAX_6-T-1.nd2:0001-0567-0512	418.715	471.722		MAX_6-T-1.nd2	7	31.63	2.21309	3.21494
MAX_7-P-1.nd2:0001-0512-0422	413.449			MAX_7-P-1.nd2	17	31.631	5.37447
MAX_7-T-1.nd2:0001-0512-0505	526.277			MAX_7-T-1.nd2	8	48.184	1.6603
MAX_7SP-1.nd2:0001-0512-0529	471.366	470.364		MAX_7SP-1.nd2	9	31.513	2.85596	3.29691
MAX_8-F-1.nd2:0001-0431-0512	368.476			MAX_8-F-1.nd2	8	30.655	2.60969
MAX_8-P-1.nd2:0001-0458-0512	436.967			MAX_8-P-1.nd2	22	31.167	7.05875
MAX_8-S-1.nd2:0001-0512-0524	414.268	406.57		MAX_8-S-1-1.nd2	12	32.096	3.73878	4.46907
GFP-2A-Cre + △SH3				GFP-2A-Cre + △SH3
MAX_2-F-1.nd2:0001-0448-0512	614.553			MAX_1-P-1.nd2	40	30.805	12.9849
MAX_2-P-1.nd2:0001-0504-0512	347.97			MAX_1-S-1.nd2	19	32.198	5.90099
MAX_2-S-1.nd2:0001-0535-0512	824.528			MAX_1-T-1.nd2	20	31.572	6.33473	8.40687
MAX_2-T-1.nd2:0001-0516-0512	446.694	558.436		MAX_2-F-1.nd2	16	30.475	5.25021
MAX_3-P-1.nd2:0001-0512-0574	364.01			MAX_2-P-1.nd2	12	30.557	3.92709
MAX_3-S-1.nd2:0001-0547-0512	418.202	391.106		MAX_2-S-1.nd2	42	31.173	13.4732
MAX_4-P-1.nd2:0001-0520-0512	482.177			MAX_2-T-1.nd2	15	30.644	4.89492	6.88635
MAX_5-F-1.nd2:0001-0443-0512	484.045			MAX_3-P-1.nd2	12	34.737	3.45453
MAX_5-S-1.nd2:0001-0466-0512	432.061			MAX_3-S-1.nd2	6	33.259	1.80402	2.62928
MAX_5-T-1.nd2:0001-0750-0512	413.259			MAX_4-P-1.nd2	19	31.566	6.01913
MAX_5-T1-1.nd2:0001-0512-0492	387.089	439.726		MAX_5-F-1.nd2	12	30.524	3.93133
MAX_6-F-1.nd2:0001-0457-0534	383.371			MAX_5-P-1.nd2	7	32.101	2.18062
MAX_6-P-1.nd2:0001-0518-0512	435.499			MAX_5-S-1.nd2	13	34.187	3.80262
MAX_6-S-1.nd2:0001-0511-0512	470.605			MAX_5-T-1.nd2	6	35.652	1.68294
MAX_6-T-1.nd2:0001-0507-0512	467.633			MAX_5-T1-1.nd2	12	31.012	3.86947	3.58102
MAX_6-T1-1.nd2:0001-0512-0492	440.348	439.491		MAX_6-F-1.nd2	4	22.148	1.80603
MAX_7-F-1.nd2:0001-0512-0591	335.348			MAX_6-P-1.nd2	33	31.218	10.5708
MAX_7-P-1.nd2:0001-0512-0462	311.72			MAX_6-S-1.nd2	11	32.089	3.42797
MAX_7-S-1.nd2:0001-0512-0654	341.678			MAX_6-T-1.nd2	16	33.791	4.73499
MAX_7-T-1.nd2:0001-0512-0511	277.498			MAX_6-T1-1.nd2	12	38.339	3.12997	4.73396
MAX_7-T1-1.nd2:0001-0512-0809	421.13	337.475		MAX_7-F-1.nd2	3	31.14	0.963391
MAX_8-P-1.nd2:0001-0463-0512	481.373			MAX_7-P-1.nd2	4	31.231	1.28078
MAX_8-S-1.nd2:0001-0515-0512	437.114			MAX_7-S-1.nd2	14	31.535	4.43951
MAX_8-T-1-1.nd2:0001-0494-0512	347.343	421.943		MAX_7-T-1.nd2	8	44.371	1.80298
MAX_9-F-1.nd2:0001-0512-0505	292.377			MAX_7-T1-1.nd2	8	32.9	2.43161	2.18365
MAX_9-P-1.nd2:0001-0512-0319	451.717			MAX_8-P-1.nd2	28	30.286	9.2452
MAX_9-S-1.nd2:0001-0581-0527	348.759			MAX_8-S-1.nd2	9	30.991	2.90407
MAX_9-T-1.nd2:0001-0459-0512	314.94	351.948		MAX_8-T-1.nd2	9	29.806	3.01953	5.05626
MAX_10-p-1.nd2:0001-0512-0597	332.158			MAX_9-F-1.nd2	5	31.351	1.59485
MAX_10-S-1.nd2:0001-0512-0388	371.213			MAX_9-P-1.nd2	26	55.344	4.69789
MAX_10-T-1.nd2:0001-0512-0478	275.737	326.369		MAX_9-S-1.nd2	9	26.914	3.34398
MAX_11-P-1.nd2:0001-0512-0521	259.759			MAX_9-T-1.nd2	7	31.869	2.19649	2.9583
MAX_11-S-1.nd2:0001-0496-0512	358.58			MAX_10-p-1.nd2	11	30.929	3.55653
MAX_11-T-1.nd2:0001-0635-0512	333.767	317.369		MAX_10-S-1.nd2	11	52.308	2.10293
MAX_12-F-1.nd2:0001-0517-0512	311.203			MAX_10-T-1.nd2	6	32.802	1.82916	2.49621
MAX_12-P-1.nd2:0001-0512-0534	638.292			MAX_11-P-1.nd2	10	31.581	3.16646
MAX_12-S-1.nd2:0001-0512-0507	499.571			MAX_11-S-1.nd2	9	32.574	2.76294
MAX_12-T-1.nd2:0001-0514-0512	218.457	416.881		MAX_11-T-1.nd2	5	30.958	1.61509	2.51483
MAX_13-P-1.nd2:0001-0512-0456	372.556			MAX_12-F-1.nd2	16	33.305	4.80408
MAX_13-S-1.nd2:0001-0512-0523	461.207			MAX_12-P-1.nd2	37	30.94	11.9586
MAX_13-T-1.nd2:0001-0512-0549	454.233	429.332		MAX_12-S-1.nd2	23	32.096	7.166
				MAX_12-T-1.nd2	10	34.009	2.9404	6.71728
				MAX_13-P-1.nd2	13	31.495	4.12764
				MAX_13-S-1.nd2	14	31.298	4.47313
				MAX_13-T-1.nd2	6	33.582	1.78667	3.46248
GFP-2A-Cre + KKK-EEE				GFP-2A-Cre + KKK-EEE
MAX_1-F-1.nd2:0001-0654-0512	486.983			MAX_1-P-1.nd2	24	30.332	7.91244
MAX_1-P-1.nd2:0001-0555-0510	508.788			MAX_1-Snd2-1.nd2	23	31.686	7.25873
MAX_1-Snd2-1.nd2:0001-0474-0512	551.121			MAX_1-T-1.nd2	21	30.475	6.89089	6.28919
MAX_1-T-1.nd2:0001-0488-0512	575.939	530.708		MAX_2-F-1.nd2	20	30.976	6.45661
MAX_2-F-1.nd2:0001-0444-0512	393.565			MAX_2-F1-1.nd2	25	31.194	8.01436	7.23549
MAX_2-F1-1.nd2:0001-0522-0512	495.497			MAX_2-P-1.nd2	25	30.257	8.26255
MAX_2-P-1.nd2:0001-0539-0512	518.945			MAX_2-S-1.nd2	17	32.809	5.18151
MAX_2-S-1.nd2:0001-0512-0442	413.942			MAX_2-T-1.nd2	18	30.858	5.83317	6.74964
MAX_2-T-1.nd2:0001-0532-0512	468.494	458.089		MAX_3-F-1.nd2	16	30.652	5.21989
MAX_3-F-1.nd2:0001-0562-0512	498.856			MAX_3-P-1.nd2	28	31.315	8.9414
MAX_3-P-1.nd2:0001-0533-0512	442.401			MAX_3-S-1.nd2	21	30.379	6.91267
MAX_3-S-1.nd2:0001-0539-0512	561.238			MAX_3-T-1-1.nd2	7	29.772	2.3512	5.85629
MAX_3-T-1.nd2:0001-0452-0512	437.529	485.006		MAX_4-P-1.nd2	52	31.038	16.7537
MAX_4-P-1.nd2:0001-0512-0677	581.748			MAX_4-S-1.nd2	15	30.219	4.96376	10.8587
MAX_4-S-1.nd2:0001-0512-0589	369.44	475.594		MAX_5-F-1.nd2	11	30.355	3.62379
MAX_5-F-1.nd2:0001-0477-0512	405.23			MAX_5-S-1.nd2	22	29.783	7.38676
MAX_5-S-1.nd2:0001-0440-0512	483.146	483.146		MAX_5-T-1.nd2	7	30.904	2.26508	4.42521
MAX_6-P-1.nd2:0001-0573-0512	321.36			MAX_6-P-1.nd2	11	31.055	3.5421
MAX_6-S-1.nd2:0001-0440-0512	335.929			MAX_6-S-1.nd2	8	31.816	2.51446
MAX_6-T-1.nd2:0001-0606-0512	324.322	327.204		MAX_6-T-1.nd2	9	29.822	3.01791	3.02482
MAX_7-P-1.nd2:0001-0568-0512	452.449			MAX_7-P-1.nd2	25	31.355	7.97321
MAX_7-s-1.nd2:0001-0321-0512	766.081	609.265		MAX_7-s-1.nd2	46	29.939	15.3646	11.6689
MAX_8-P-1.nd2:0001-0512-0697	625.132			MAX_8-P-1.nd2	29	30.888	9.38876
MAX_8-S-1.nd2:0001-0512-0707	739.802	682.467		MAX_8-S-1.nd2	19	30.923	6.14429
MAX_9-P-1.nd2:0001-0679-0512	442.306			MAX_9-P-1.nd2	23	30.639	7.50677	7.67994
MAX_9-S-1.nd2:0001-0379-0512	446.854			MAX_9-S-1.nd2	32	29.678	10.7824
MAX_9-S1-1.nd2:0001-0512-0607	422.604			MAX_9-S1-1.nd2	12	31.013	3.86935
MAX_9-T-1.nd2:0001-0505-0512	609.378	480.286		MAX_9-T-1.nd2	20	30.815	6.49035	7.36365
MAX_10-P-1.nd2:0001-0512-0590	444.677			MAX_10-P-1.nd2	20	51.733	3.866
MAX_10-S-1.nd2:0001-0458-0512	439.373			MAX_10-S-1.nd2	9	29.655	3.0349
MAX_10-T-1.nd2:0001-0531-0513	362.041	415.364		MAX_10-T-1.nd2	20	41.682	4.79823	3.89971
MAX_11-F-1.nd2:0001-0512-0528	344.044			MAX_11-F-1.nd2	10	31.497	3.17491
MAX_11-F1-1.nd2:0001-0512-0724	373.348			MAX_11-F1-1.nd2	10	41.306	2.42096
MAX_11-P-1.nd2:0001-0431-0512	341.223			MAX_11-P-1.nd2	16	28.227	5.66833
MAX_11-T-1.nd2:0001-0386-0512	370.842	357.364		MAX_11-T-1.nd2	18	30.268	5.94687	4.30277
MAX_12-F-1.nd2:0001-0499-0512	410.52			MAX_12-F-1.nd2	16	46.885	3.41261
MAX_12-P-1.nd2:0001-0565-0512	285.332			MAX_12-P-1.nd2	15	29.715	5.04796
MAX_12-S-1.nd2:0001-0317-0512	291.741			MAX_12-S-1.nd2	14	30.749	4.55299
MAX_12-T-1.nd2:0001-0679-0512	344.379	332.993		MAX_12-T-1.nd2	11	29.003	3.79271	4.20157
MAX_13-P-1.nd2:0001-0512-0652	368.746			MAX_13-P-1.nd2	15	30.898	4.85468
MAX_13-S-1.nd2:0001-0508-0670	442.213			MAX_13-S-1.nd2	11	24.379	4.51208
MAX_13-T-1.nd2:0001-0512-0560	342.323	384.427		MAX_13-T-1.nd2	9	31.963	2.81576	4.06084
MAX_14-P-1.nd2:0001-0481-0512	287.382			MAX_14-P-1.nd2	9	29.853	3.01477
MAX_14-S-1.nd2:0001-0368-0512	320.548			MAX_14-S-1.nd2	10	30.502	3.27847
MAX_14-T-1.nd2:0001-0512-0507	290.317	299.416		MAX_14-T-1.nd2	5	31.995	1.56274	2.61866
GFP-2A-Cre + Y343A				GFP-2A-Cre + Y343A
MAX_1-P-1.nd2:0001-0512-0488	562.596			MAX_1-P-1.nd2	37	31.32	11.8135
MAX_2-S-1.nd2:0001-0512-0561	374.038			MAX_2-S-1.nd2	35	32.196	10.8709
MAX_2-T-1.nd2:0001-0512-0544	404.073	446.902		MAX_2-T-1.nd2	13	35.133	3.70022	8.79489
MAX_3-F-1.nd2:0001-0512-0577	325.208			MAX_3-F-1.nd2	26	30.799	8.44183
MAX_3-F1-1.nd2:0001-0512-0569	286.772			MAX_3-F1-1.nd2	9	30.735	2.92826
MAX_3-P-1.nd2:0001-0536-0512	310.658			MAX_3-P-1.nd2	20	31.626	6.32391
MAX_3-S-1.nd2:0001-0512-0514	448.705			MAX_3-S-1.nd2	18	31.419	5.72902
MAX_3-T-1.nd2:0001-0512-0631	309.646	336.198		MAX_3-T-1.nd2	12	31.023	3.8681	5.45822
MAX_4-P-1.nd2:0001-0512-0517	332.785			MAX_4-P-1.nd2	21	31.839	6.59568
MAX_4-S-1.nd2:0001-0582-0512	268.597			MAX_4-S-1.nd2	6	31.74	1.89036
MAX_4-T-1.nd2:0001-0569-0512	276.221	292.534		MAX_4-T-1.nd2	7	30.99	2.25879	3.58161
MAX_5-P-1.nd2:0001-0511-0512	336.629			MAX_5-P-1.nd2	17	32.456	5.23786
MAX_5-S-1.nd2:0001-0450-0512	426.517			MAX_5-S-1.nd2	22	31.38	7.01083
MAX_5-T-1.nd2:0001-0504-0512	464.812	409.319		MAX_5-T-1.nd2	7	29.629	2.36255	4.68669
MAX_6-Pnd2-1.nd2:0001-0385-0512	595.021			MAX_6-Pnd2-1.nd2	9	30.399	2.96062
MAX_6-T-1.nd2:0001-0512-0594	422.69	508.856		MAX_6-S-1.nd2	6	30.581	1.962
MAX_7-P-1.nd2:0001-0540-0512	477.046			MAX_6-T-1.nd2	7	30.827	2.27074	2.39779
MAX_7-S-1.nd2:0001-0512-0686	325.518			MAX_7-P-1.nd2	13	31.709	4.09978
MAX_7-T-1.nd2:0001-0512-0674	534.052	445.539		MAX_7-S-1.nd2	5	37.083	1.34833
MAX_8-F-1.nd2:0001-0512-0513	280.563			MAX_7-T-1.nd2	22	43.765	5.02685	3.49165
MAX_8-F1-1.nd2:0001-0512-0472	228.666			MAX_8-F-1.nd2	12	31.862	3.76624
MAX_8-P-1.nd2:0001-0512-0524	221.993			MAX_8-F1-1.nd2	15	35.507	4.22452
MAX_8-S-1.nd2:0001-0512-0471	196.943			MAX_8-P-1.nd2	22	35.519	6.19387
MAX_8-T-1.nd2:0001-0512-0539	217.188	229.071		MAX_8-S.nd2:1	25	30.85	8.10373
MAX_9-P-1.nd2:0001-0512-0512	337.746			MAX_8-T-1.nd2	5	31.588	1.58288	4.77425
MAX_9-S-1.nd2:0001-0467-0512	379.383			MAX_9-P-1.nd2	16	30.935	5.17214
MAX_9-T-1.nd2:0001-0265-0607	386.923	368.017		MAX_9-S-1.nd2	6	31.846	1.88407
MAX_10-F-1.nd2:0001-0531-0508	544.993			MAX_9-T-1.nd2	10	36.052	2.77377	3.27666
MAX_10-P-1.nd2:0001-0512-0528	404.813			MAX_10-F-1.nd2	33	32.112	10.2765
MAX_10-S-1.nd2:0001-0543-0690	431.425			MAX_10-P-1.nd2	13	31.208	4.1656
MAX_10-Tnd2-1.nd2:0001-0539-0512	403.617	446.212		MAX_10-S-1.nd2	23	52.941	4.34446
MAX_11-P-1.nd2:0001-0512-0553	370.292			MAX_10-Tnd2-1.nd2	6	32.54	1.84388	5.15762
MAX_11-S-1.nd2:0001-0512-0432	471.583			MAX_11-P-1.nd2	7	35.736	1.95881
MAX_11-T-1.nd2:0001-0512-0490	659.745	500.54		MAX_11-S-1.nd2	27	30.581	8.82901
				MAX_11-T-1.nd2	27	45.039	5.9948	5.59421
GFP + Vector				GFP + Vector
MAX_1-F-1.nd2:0002-0557-0512	717.185	717.185		MAX_1-F-1.nd2	22	31.535	6.97638	6.97638
MAX_3-T1-1.nd2:0002-0517-0512	785.163			MAX_3-T1-1.nd2	34	31.126	10.9233
MAX_3-T-1.nd2:0002-0512-0559	906.51			MAX_3-T-1.nd2	61	32.047	19.0345
MAX_3-S-1.nd2:0002-0512-0729	977.887			MAX_3-S-1.nd2	65	32.047	20.2827
MAX_3-P-1.nd2:0002-0512-0346	778.81			MAX_3-P-1.nd2	97	52.2	18.5824
MAX_3-F-1.nd2:0002-0480-0512	659.284	821.531		MAX_3-F-1.nd2	43	30.929	13.9028	16.5452
MAX_2-T-1.nd2:0001-0512-0555	594.803			MAX_2-T-1.nd2	23	32.316	7.11722
MAX_2-S-1.nd2:0002-0512-0526	512.724			MAX_2-S-1.nd2	25	33.143	7.54307
MAX_2-P-1.nd2:0002-0564-0512	739.195			MAX_2-P-1.nd2	34	30.944	10.9876
MAX_2-F-1.nd2:0002-0512-0452	564.686	602.852		MAX_2-F-1.nd2	12	31.473	3.81279	7.36517
MAX_1-T1-1.nd2:0002-0555-0509	567.5			MAX_1-T1-1.nd2	27	39.301	6.87005
MAX_1-T-1.nd2:0002-0566-0512	740.421			MAX_1-T-1.nd2	31	33.849	9.15832
MAX_1-S1-1.nd2:0002-0512-0456	578.93			MAX_1-S1-1.nd2	18	33.276	5.4093
MAX_1-S-1.nd2:0002-0512-0518	616.377			MAX_1-S-1.nd2	24	33.264	7.21501
MAX_1-P-1.nd2:0002-0512-0476	744.132	649.472		MAX_1-P-1.nd2	40	31.073	12.8729	8.30512
MAX_7-T-1.nd2:0002-0571-0512	795.747			MAX_7-T-1.nd2	40	30.885	12.9513
MAX_7-S-1.nd2:0002-0528-0512	721.213			MAX_7-S-1.nd2	37	31.85	11.617
MAX_7-P-1.nd2:0002-0259-0512	766.427			MAX_7-P-1.nd2	81	32.612	24.8375
MAX_7-F-1.nd2:0002-0512-0468	760.423	760.952		MAX_7-F-1.nd2	25	30.808	8.11478	14.3801
MAX_6-T-1.nd2:0002-0566-0512	746.225			MAX_6-T-1.nd2	25	30.965	8.07363
MAX_6-S1-1.nd2:0002-0407-0512	758.292			MAX_6-S1-1.nd2	34	30.631	11.0999
MAX_6-S-1.nd2:0002-0512-0461	872.55			MAX_6-S-1.nd2	38	31.723	11.9787
MAX_6-P-1.nd2:0002-0512-0560	740.313			MAX_6-P-1.nd2	59	31.401	18.7892
MAX_6-F-1.nd2:0002-0549-0512	869.019	910.321		MAX_6-F-1.nd2	38	32.39	11.732	12.3347
MAX_5-S-1.nd2:0002-0512-0472	921.658			MAX_5-S-1.nd2	33	31.584	10.4483
MAX_5-P-1.nd2:0002-0512-0337	878.576	900.117		MAX_5-P-1.nd2	48	33.896	14.161	12.3046
MAX_4-T-1.nd2:0002-0547-0512	842.103			MAX_4-T-1.nd2	38	31.287	12.1456
MAX_4-S-1.nd2:0002-0711-0512	779.078			MAX_4-S-1.nd2	80	51.769	15.4533
MAX_4-P-1.nd2:0002-0547-0512	747.19			MAX_4-P-1.nd2	89	30.918	28.7858
MAX_4-F-1.nd2:0002-0512-0487	978.445	836.704		MAX_4-F-1.nd2	26	31.953	8.13695	16.1304
GFP-2A-Cre + Vector				GFP-2A-Cre + Vector
MAX_6-T-1.nd2:0002-0583-0512	480.237			MAX_6-T-1.nd2	10	31.252	3.1998
MAX_6-S-1.nd2:0002-0516-0512	597.209			MAX_6-S-1.nd2	22	30.384	7.24065
MAX_6-P-1.nd2:0002-0375-0512	428.216			MAX_6-P-1.nd2	12	32.114	3.73669
MAX_6-F-1.nd2:0002-0512-0299	598.992	526.163		MAX_6-F-1.nd2	23	52.788	4.35705	4.63355
MAX_5-T-1.nd2:0002-0512-0500	800.153			MAX_5-T-1.nd2	43	31.065	13.8419
MAX_5-S-1.nd2:0002-0483-0517	647.213			MAX_5-S-1.nd2	22	30.575	7.19542
MAX_5-P1-1.nd2:0002-0485-0512	620.764			MAX_5-P1-1.nd2	36	30.851	11.669	10.9021
MAX_5-P-1.nd2:0002-0479-0512	518.851	646.745		MAX_4-T-1.nd2	18	30.415	5.91813
MAX_4-T-1.nd2:0002-0512-0474	508.612			MAX_4-S-1.nd2	17	31.055	5.47416
MAX_4-S-1.nd2:0002-0512-0464	460.353			MAX_4-P-1.nd2	18	30.902	5.82487	5.73905
MAX_4-P-1.nd2:0002-0482-0512	469.7	479.555		MAX_3-T-1.nd2	30	30.334	9.88989
MAX_3-T-1.nd2:0002-0512-0425	607.366			MAX_3-S1-1.nd2	21	34.76	6.04143
MAX_3-S1-1.nd2:0002-0515-0512	507.659			MAX_3-S-1.nd2	30	38.95	7.70218
MAX_3-S-1.nd2:0002-0514-0593	510.895			MAX_3-P-1.nd2	16	45.616	3.50754
MAX_3-P-1.nd2:0002-0498-0512	565.189			MAX_3-S-1.nd2	37	30.721	12.0439
MAX_3-S-1.nd2:0002-0512-0591	528.712			MAX_3-F-1.nd2	18	40.062	4.49304	7.27966
MAX_3-F-1.nd2:0002-0512-0464	464.432	530.709		MAX_2-T-1.nd2	14	45.249	3.09399
MAX_2-T-1.nd2:0002-0544-0504	463.745			MAX_2-S-1.nd2	19	31.287	6.07281
MAX_2-S-1.nd2:0002-0522-0516	434.432			MAX_2-P-1.nd2	28	31.057	9.01568	6.06083
MAX_2-P-1.nd2:0002-0507-0512	426.492	441.556		MAX_1-T-1.nd2	17	30.339	5.60335
MAX_1-T-1.nd2:0002-0559-0521	533.396			MAX_1-S-1.nd2	37	31.133	11.8845
MAX_1-S-1.nd2:0002-0364-0512	472.04			MAX_1-p-1.nd2	9	30.729	2.92883	6.80556
MAX_1-p-1.nd2:0002-0470-0512	480.128	495.188
GFP-2A-Cre + p140Cap				GFP-2A-Cre + p140Cap
MAX_8-P-1.nd2:0002-0512-0599	429.574	429.574		MAX_8-P-1.nd2	26	32.1	8.09969	8.09969
MAX_7-T-1.nd2:0002-0512-0542	499.858			MAX_7-T-1.nd2	25	31.753	7.87327
MAX_7-S-1.nd2:0002-0512-0717	528.552			MAX_7-S-1.nd2	39	34.48	11.3109
MAX_7-P-1.nd2:0002-0512-0645	475.928			MAX_7-P-1.nd2	38	31.859	11.9276
MAX_7-F-1.nd2:0002-0512-0505	516.959	505.324		MAX_7-F-1.nd2	23	31.656	7.26561	9.59433
MAX_6-TF-1.nd2:0002-0578-0512	427.859			MAX_6-TF-1.nd2	25	31.569	7.91916
MAX_6-T-1.nd2:0002-0512-0597	562.529			MAX_6-T-1.nd2	17	63.69	2.66918
MAX_6-S-1.nd2:0002-0512-0565	485.006			MAX_6-S-1.nd2	20	30.94	6.46412
MAX_6-P-1.nd2:0002-0512-0689	450.917			MAX_6-P-1.nd2	18	30.006	5.9988
MAX_6-F1-1.nd2:0002-0633-0509	455.097	476.282		MAX_6-F1-1.nd2	7	31.666	2.21057	5.05237
MAX_5-T-1.nd2:0002-0301-0512	414.212			MAX_5-T-1.nd2	17	65.762	2.58508
MAX_5-S-1.nd2:0002-0624-0495	439.684			MAX_5-S-1.nd2	27	59.962	4.50285
MAX_5-P-1.nd2:0002-0538-0512	508.843			MAX_5-P-1.nd2	18	30.942	5.81734
MAX_5-F-1.nd2:0002-0549-0512	498.37	465.277		MAX_5-F-1.nd2	11	30.974	3.55137	4.11416
MAX_4-S-1.nd2:0002-0512-0678	638.112			MAX_4-S-1.nd2	19	31.688	5.99596
MAX_4-P-1.nd2:0002-0512-0594	740.657	689.385		MAX_4-P-1.nd2	37	31.772	11.6455	8.82072
MAX_3-T-1.nd2:0002-0560-0512	368.008			MAX_3-T-1.nd2	10	31.767	3.14792
MAX_3-S-1.nd2:0002-0401-0512	364.353			MAX_3-S-1.nd2	27	30.769	8.77507
MAX_3-P-1.nd2:0002-0381-0512	325.082			MAX_3-P-1.nd2	17	31.26	5.43826
MAX_3-F-1.nd2:0002-0447-0512	313.256	342.675		MAX_3-F-1.nd2	4	31.352	1.27584	4.65927
MAX_2-T-1.nd2:0002-0512-0757	529.39			MAX_2-T-1.nd2	16	31.697	5.0478
MAX_2-S-1.nd2:0002-0512-0738	481.524			MAX_2-S-1.nd2	23	31.448	7.31366
MAX_2-P-1.nd2:0002-0603-0512	521.324			MAX_2-P-1.nd2	11	32.356	3.39968
MAX_2-F-1.nd2:0002-0512-0739	529.784	515.505		MAX_2-F-1.nd2	16	31.555	5.07051	5.20791
MAX_1-T-1.nd2:0002-0536-0512	548.436			MAX_1-T-1.nd2	32	30.783	10.3953
MAX_1-F-1.nd2:0002-0512-0659	609.676	579.056		MAX_1-F-1.nd2	34	30.718	11.0684	10.7319
GFP-2A-Cre +△SH3				GFP-2A-Cre + △SH3
MAX_6-T-1.nd2:0002-0512-0509	636.603			MAX_6-T-1.nd2	13	31.678	4.10379
MAX_6-S-1.nd2:0002-0512-0507	579.587			MAX_6-S-1.nd2	18	31.895	5.64352
MAX_6-P-1.nd2:0002-0512-0495	616.746			MAX_6-P-1.nd2	28	31.683	8.83755
MAX_6-P-1.nd2:0002-0512-0494	614.831	611.942		MAX_6-P-1.nd2	25	31.652	7.8984	6.62081
MAX_5-T-1.nd2:0002-0517-0440	587.188			MAX_5-T-1.nd2	20	32.605	6.13403
MAX_5-S-1.nd2:0002-0534-0512	565.71			MAX_5-S-1.nd2	13	31.579	4.11666
MAX_5-P-1.nd2:0002-0488-0512	526.442	559.78		MAX_5-P-1.nd2	15	32.185	4.66056	4.97041
MAX_4-T1-1.nd2:0002-0512-0557	555.941			MAX_4-T1-1.nd2	20	34.842	5.7402
MAX_4-T-1.nd2:0002-0561-0511	467.896			MAX_4-T-1.nd2	18	30.445	5.9123
MAX_4-S-1.nd2:0002-0512-0357	415.82			MAX_4-S-1.nd2	16	37.027	4.32117
MAX_4-P-1.nd2:0002-0512-0462	556.553			MAX_4-P-1.nd2	34	31.484	10.7991
MAX_4-F-1.nd2:0002-0512-0511	563.47	511.936		MAX_4-F-1.nd2	19	32.357	5.87199	6.52896
MAX_3-S-1.nd2:0002-0512-0497	634.353			MAX_3-S-1.nd2	38	30.773	12.3485
MAX_3-P-1.nd2:0002-0547-0512	547.894	591.124		MAX_3-P-1.nd2	33	31.583	10.4487	11.3986
MAX_2-T-1.nd2:0002-0512-0495	588.559			MAX_2-T-1.nd2	31	31.434	9.86193
MAX_2-S-1.nd2:0002-0403-0512	503.862			MAX_2-S-1.nd2	20	32.512	6.15157
MAX_2-P-1.nd2:0002-0512-0579	507.381			MAX_2-P-1.nd2	23	32.117	7.16132
MAX_2-F-1.nd2:0002-0512-0513	581.238	545.26		MAX_2-F-1.nd2	19	31.136	6.10226	7.31927
MAX_1-T-1.nd2:0002-0547-0519	467.808			MAX_1-T-1.nd2	15	32.277	4.64727
MAX_1-P-1.nd2:0002-0571-0512	505.072			MAX_1-P-1.nd2	27	31.053	8.69481
MAX_1-S-1.nd2:0002-0512-0442	470.367	481.082		MAX_1-S-1.nd2	15	31.044	4.83185	6.05798
GFP + Vector				GFP + Vector
MAX_6-S-1.nd2:0001-0512-0461	360.491			MAX_6-S-1.nd2	9	38.372	2.34546
MAX_6-P-1-1.nd2:0001-0326-0512	519.384	439.938		MAX_6-P-1-1.nd2	92	64.193	14.3318	8.33862
MAX_5-S-1.nd2:0001-0512-0495	384.485			MAX_5-S-1.nd2	12	30.998	3.87122
MAX_5-T1-1.nd2:0001-0709-0512	323.715			MAX_5-T1-1.nd2	10	36.692	2.72539
MAX_5-T-1.nd2:0001-0546-0512	535.73			MAX_5-T-1.nd2	29	32.402	8.95006
MAX_5-P-1.nd2:0001-0529-0512	493.269			MAX_5-P-1.nd2	45	62.696	7.17749
MAX_5-F-1.nd2:0001-0606-0512	440.265	435.493		MAX_5-F-1.nd2	8	30.665	2.60884	5.0666
MAX_4-T1-1.nd2:0001-0526-0512	531.75			MAX_4-T1-1.nd2	14	29.668	4.71889
MAX_4-T-1.nd2:0001-0504-0512	579.825			MAX_4-T-1.nd2	27	32.728	8.24982
MAX_4-S-1.nd2:0001-0512-0692	377.504			MAX_4-S-1.nd2	26	58.989	4.4076
MAX_4-P-1.nd2:0001-0512-0548	415.782	476.215		MAX_4-P-1.nd2	39	32.987	11.8228	7.29979
MAX_3-T-1.nd2:0001-0666-0512	385.099			MAX_3-T-1.nd2	22	31.576	6.96732
MAX_3-S-1.nd2:0001-0347-0512	482.99			MAX_3-S-1.nd2	34	33.789	10.0624
MAX_3-P-1.nd2:0001-0395-0519	445.497	437.862		MAX_3-P-1.nd2	37	38.956	9.4979	8.84255
MAX_2-T-1.nd2:0001-0512-0551	326.732			MAX_2-T-1.nd2	6	33.711	1.77983
MAX_2-S-1.nd2:0001-0512-0603	398.325			MAX_2-S-1.nd2	22	30.163	7.2937
MAX_2-P-1.nd2:0001-0514-0512	316.792	347.283		MAX_2-P-1.nd2	27	64.375	4.19417	4.42257
MAX_1=P-1.nd2:0001-0512-0448	408.34			MAX_1=P-1.nd2	27	31.231	8.64526
MAX_1-S-1.nd2:0001-0512-0325	412.91	410.625		MAX_1-S-1.nd2	30	51.397	5.83692	7.24109
GFP-2A-Cre + p140Cap				GFP-2A-Cre + p140Cap
MAX_8-S-1-1.nd2:0001-0577-0512	346.342			MAX_8-S-1-1.nd2	8	31.422	2.54599
MAX_8-P-1.nd2:0001-0512-0487	361.198	353.77		MAX_8-P-1.nd2	10	33.275	3.00526	2.77562
MAX_7-T-1.nd2:0001-0512-0467	369.492			MAX_7-T-1.nd2	11	31.399	3.5033
MAX_7-T.nd2:1	1438.18			MAX_7-S-1.nd2	15	33.025	4.54201
MAX_7-P-1.nd2:0001-0519-0512	308.613			MAX_7-P-1.nd2	15	30.805	4.86934
MAX_7-P-1.nd2:0001-0510-0512	492.324			MAX_7-P-1.nd2	28	30.379	9.21689
MAX_7-F-1.nd2:0001-0512-0522	440.079	609.737		MAX_7-F-1.nd2	18	31.449	5.72355	5.57102
MAX_6-T1-1.nd2:0001-0512-0519	327.814			MAX_6-T1-1.nd2	7	31.386	2.23029
MAX_6-T-1.nd2:0001-0512-0415	287.863			MAX_6-T-1.nd2	8	31.627	2.52948
MAX_6-S-1.nd2:0001-0512-0643	342.795			MAX_6-S-1.nd2	6	31.544	1.9021
MAX_6-P-1.nd2:0001-0512-0497	325.979			MAX_6-P-1.nd2	7	31.271	2.2385
MAX_6-F-1.nd2:0001-0558-0512	368.791	330.648		MAX_6-F-1.nd2	14	31.464	4.44953	2.66998
MAX_5-T-1.nd2:0001-0413-0512	445.334			MAX_5-T-1.nd2	16	38.232	4.18498
MAX_5-S-1.nd2:0001-0512-0519	364.12			MAX_5-S-1.nd2	14	31.266	4.47771
MAX_5-P-1.nd2:0001-0512-0456	275.777	361.744		MAX_5-P-1.nd2	13	31.334	4.14885	4.27051
MAX_4-T-1.nd2:0001-0512-0451	299.469			MAX_4-T-1.nd2	10	44.857	2.22931
MAX_4-S-1.nd2:0001-0540-0512	372.404			MAX_4-S-1.nd2	23	31.096	7.39645
MAX_4-P-1.nd2:0001-0511-0501	327.836	333.236		MAX_4-P-1.nd2	15	31.146	4.81603	4.81393
MAX_3-P-1.nd2:0001-0512-0412	290.741	290.741		MAX_3-P-1.nd2	11	49.839	2.20711	2.20711
MAX_1-p-1.nd2:0001-0547-0512	268.747			MAX_1-p-1.nd2	30	31.87	9.41324
MAX_1-s-1.nd2:0001-0516-0512	252.461			MAX_1-s-1.nd2	17	31.762	5.35231
MAX_1-t-1.nd2:0001-0496-0512	346.537	289.248		MAX_1-t-1.nd2	5	31.975	1.56372	2.20711
MAX_2-F-1.nd2:0001-0512-0554	218.736			MAX_2-F-1.nd2	2	30.519	0.655329
MAX_2-P-1.nd2:0001-0512-0416	394.231			MAX_2-P-1.nd2	12	63.373	1.89355
MAX_2-S-1.nd2:0001-0470-0512	337.166			MAX_2-S-1.nd2	3	30.91	0.97056
MAX_2-T-1.nd2:0001-0512-0553	306.128	314.065		MAX_2-T-1.nd2	4	33.119	1.20777	1.1818
GFP-2A-Cre + Vector				GFP-2A-Cre + Vector
MAX_8--S-1.nd2:0001-0358-0512	381.226			MAX_8--S-1.nd2	9	31.815	2.82885
MAX_8--P-1.nd2:0001-0477-0512	341.201	361.214		MAX_8--P-1.nd2	10	31.442	3.18046	3.00466
MAX_7--S-1.nd2:0001-0477-0512	365.666			MAX_7--S-1.nd2	5	31.373	1.59373
MAX_7--P-1.nd2:0001-0490-0512	318.327	341.997		MAX_7--P-1.nd2	3	30.613	0.979976	1.28685
MAX_6--S-1.nd2:0001-0512-0512	258.357			MAX_6--S-1.nd2	5	30.426	1.64333
MAX_6--P-1.nd2:0001-0512-0554	342.435	300.396		MAX_6--P-1.nd2	8	30.704	2.60552	2.12443
MAX_5--T-1.nd2:0001-0559-0512	298.082			MAX_5--T-1.nd2	7	31.253	2.23978
MAX_5--S-1.nd2:0001-0541-0512	353.821	325.952		MAX_5--S-1.nd2	8	30.661	2.60918
MAX_4--T-1.nd2:0001-0512-0474	372.789	372.789		MAX_5--P-1.nd2	5	31.672	1.57868	2.14255
MAX_3--T-1.nd2:0001-0512-0685	387.563			MAX_4--T-1.nd2	10	32.704	3.05773	3.05773
MAX_3--S-1.nd2:0001-0512-0557	312.53	350.046		MAX_3--T-1.nd2	8	31.509	2.53896
MAX_4--P-1.nd2:0001-0517-0512	466.779			MAX_3--S-1.nd2	18	31.933	5.6368	4.08788
MAX_4--S-1.nd2:0001-0443-0429	375.413	421.096		MAX_4--P-1.nd2	10	31.037	3.22196
MAX_3--P-1.nd2:0001-0522-0512	322.427	322.427		MAX_4--S-1.nd2	8	25.952	3.08261	3.15229
MAX_2--T-1.nd2:0001-0495-0512	391.12			MAX_3--P-1.nd2	8	31.386	2.54891	2.54891
MAX_2--S-1.nd2:0001-0512-0387	224.215			MAX_2--T-1.nd2	6	30.803	1.94786
MAX_2--P-1.nd2:0001-0512-0695	308.763	308.033		MAX_2--S-1.nd2	7	31.136	2.2482
MAX_1--S-1.nd2:0001-0512-0718	334.034	334.034		MAX_2--P-1.nd2	7	31.221	2.24208	2.14605
				MAX_1--S-1.nd2	9	38.653	2.32841	2.32841
GFP-2A-Cre + aa172-352				GFP-2A-Cre + aa172-352
MAX_7-T-1.nd2:0001-0512-0691	402.125			MAX_7-T-1.nd2	5	32.335	1.54631
MAX_7-S-1.nd2:0001-0518-0512	419.176			MAX_7-S-1.nd2	16	30.886	5.18034
MAX_7-P-1.nd2:0001-0380-0512	329.348	383.55		MAX_7-P-1.nd2	10	31.512	3.17339	3.30002
MAX_6-T-1.nd2:0001-0512-0483	511.193			MAX_6-T-1.nd2	25	57.232	4.36819
MAX_6-S-1.nd2:0001-0693-0512	352.679			MAX_6-S-1.nd2	11	48.481	2.26893
MAX_6-P-1.nd2:0001-0512-0697	398.899	420.924		MAX_6-P-1.nd2	14	33.009	4.24127	3.62613
MAX_5-T-1.nd2:0001-0497-0512	421.511			MAX_5-T-1.nd2	7	30.93	2.26317
MAX_5-S-1.nd2:0001-0577-0512	436.621			MAX_5-S-1.nd2	4	34.269	1.16724
MAX_5-P-1.nd2:0001-0427-0512	326.449	394.86		MAX_5-P-1.nd2	4	30.493	1.31178	1.58073
MAX_4-T-1.nd2:0001-0512-0633	434.365			MAX_4-T-1.nd2	7	31.042	2.25501
MAX_4-S-1.nd2:0001-0512-0544	284.481	359.423		MAX_4-S-1.nd2	6	31.929	1.87917	2.06709
MAX_3-P-1.nd2:0001-0512-0489	412.409			MAX_3-P-1.nd2	10	30.99	3.22685
MAX_3-T-1.nd2:0001-0512-0517	306.334	359.372		MAX_3-T-1.nd2	6	30.891	1.94231	2.58458
MAX_4-P-1.nd2:0001-0512-0656	294.286	294.286		MAX_4-P-1.nd2	9	39.792	2.26176
MAX_2-T-1.nd2:0001-0512-0503	316.17			MAX_2-T-1.nd2	3
MAX_2-S-1.nd2:0001-0471-0512	367.777			MAX_2-S-1.nd2	2	31.547	0.633975
MAX_2-P-1.nd2:0001-0512-0538	350.293	344.747		MAX_2-P-1.nd2	3	31.277	0.959171	0.796573
MAX_1-P-1.nd2:0001-0512-0533	492.944			MAX_1-P-1.nd2	7	39.057	1.79225	1.79225
MAX_1-S-1.nd2:0001-0512-0539	325.614	409.279		MAX_1-S-1.nd2	4
MAX_14-S-1.nd2:0001-0512-0478	338.353	338.353		MAX_14-S-1.nd2	6	31.207	1.92265	1.92265
MAX_12-T-1.nd2:0001-0512-0523	298.218			MAX_12-T-1.nd2	4	31.639	1.26426
MAX_12-S-1.nd2:0001-0512-0506	290.893			MAX_12-S-1.nd2	5	31.716	1.57649
MAX_12-P-1.nd2:0001-0512-0158	308.014	299.042		MAX_12-P-1.nd2	2	53.995	0.370405	1.07039
MAX_11-S-1.nd2:0001-0512-0520	323.523			MAX_11-S-1.nd2	3	31.022	0.967056
MAX_11-P-1.nd2:0001-0512-0486	287.526	305.524		MAX_11-P-1.nd2	4	31.175	1.28308	1.12507
MAX_10-T-1.nd2:0001-0512-0516	331.425			MAX_10-T-1.nd2	6	34.811	1.72359
MAX_10-s-1.nd2:0001-0512-0438	481.096	406.26		MAX_10-s-1.nd2	28	31.42	8.91152	5.31756
MAX_9-P-1.nd2:0001-0512-0456	521.493	521.493		MAX_9-P-1.nd2	26	31.074	8.36712	8.36712
GFP-2A-Cre +△SH3				GFP-2A-Cre +△SH3
MAX_3-T-1.nd2:0001-0512-0560	315.065			MAX_3-T-1.nd2	5	31.843	1.5702
MAX_3-S-1.nd2:0001-0512-0514	398.403			MAX_3-S-1.nd2	13	31.277	4.15641
MAX_3-P-1.nd2:0001-0512-0416	323.117	345.528		MAX_3-P-1.nd2	5	32.845	1.5223	2.4163
MAX_2-P-1.nd2:0001-0543-0512	317.401	317.401		MAX_2-P-1.nd2	6	30.872	1.94351	1.94351
MAX_1-T-1.nd2:0001-0512-0673	361.269			MAX_1-T-1.nd2	11	31.54	3.48763
MAX_1-S-1.nd2:0001-0421-0512	516.992			MAX_1-S-1.nd2	14	31.257	4.479
MAX_1-P-1.nd2:0001-0512-0531	256.319	378.193		MAX_1-P-1.nd2	2	36.39	0.549602	2.83874
MAX_6-T-1.nd2:0001-0342-0512	358.404			MAX_6-T-1.nd2	7
MAX_6-S-1.nd2:0001-0518-0512	459.902	409.153		MAX_6-S-1.nd2	18	31.209	5.76757	5.76757
MAX_5-T-1.nd2:0001-0471-0512	291.518			MAX_5-T-1.nd2	5	39.28	1.27291
MAX_5-S-1.nd2:0001-0585-0512	283.833	287.675		MAX_5-S-1.nd2	7	30.963	2.26076	1.76684
MAX_4-T-1.nd2:0001-0555-0512	406.711			MAX_4-T-1.nd2	2	31.366	0.637633
MAX_4-S-1.nd2:0001-0616-0512	296.501	351.606		MAX_4-S-1.nd2	3	32.859	0.912992	0.775312
MAX_5-P-1.nd2:0001-0464-0512	367.027	367.027		MAX_5-P-1.nd2	18	30.508	5.90009	5.90009
MAX_9-T-1.nd2:0001-0491-0521	501.823			MAX_9-T-1.nd2	10	30.219	3.30918
MAX_9-S-1.nd2:0001-0511-0512	455.475	478.649		MAX_9-S-1.nd2	6	30.736	1.95211	2.63064
MAX_12-T-1.nd2:0001-0499-0512	350.301			MAX_12-T-1.nd2	11	30.796	3.57189
MAX_12-S-1.nd2:0001-0512-0451	433.865			MAX_12-S-1.nd2	6	45.003	1.33324
MAX_12-P-1.nd2:0001-0554-0512	310.725	364.964		MAX_12-P-1.nd2	5	31.565	1.58403	2.16306
MAX_11-T-1.nd2:0001-0641-0512	316.95			MAX_11-T-1.nd2	5	31.304	1.59724
MAX_11-S-1.nd2:0001-0512-0513	343.455			MAX_11-S-1.nd2	5	31.389	1.59291
MAX_11-P-1.nd2:0001-0512-0525	468.19	376.198		MAX_11-P-1.nd2	17	30.757	5.5272	2.90578
MAX_10-P-1.nd2:0001-0251-0512	299.161	299.161		MAX_10-P-1.nd2	6	30.805	1.94774	1.94774
MAX_15-T-1.nd2:0001-0528-0512	345.867			MAX_15-T-1.nd2	3	31.225	0.960769
MAX_15-S-1.nd2:0001-0512-0502	325.718			MAX_15-S-1.nd2	4	30.317	1.31939
MAX_15-S-1.nd2:0001-0512-0503	311.441			MAX_15-S-1.nd2	4	30.849	1.29664
MAX_15-P-1.nd2:0001-0542-0512	303.196	321.555		MAX_15-P-1.nd2	1	32.277	0.309818	0.971654
MAX_14-T-1.nd2:0001-0550-0471	292.22			MAX_14-T-1.nd2	6	30.506	1.96683
MAX_14-S-1.nd2:0001-0489-0512	233.29	262.755		MAX_14-S-1.nd2	2	31.218	0.640656	1.30374
MAX_13-T-1.nd2:0001-0786-0512	244.692			MAX_13-T-1.nd2	5	36.268	1.37863
MAX_13-P-1.nd2:0001-0426-0512	300.511			MAX_13-P-1.nd2	4	32.512	1.23031
MAX_13-T-1.nd2:0001-0786-0512	357.741	300.981		MAX_13-T-1.nd2	5	31.589	1.58283	1.39726
GFP-2A-Cre + KKK-EEE				GFP-2A-Cre + KKK-EEE
MAX_5-T-1.nd2:0001-0422-0512	283.207	283.207		MAX_5-T-1.nd2	7	31.436	2.22675
MAX_3-P-1.nd2:0001-0588-0512	269.217			MAX_5-P-1.nd2	16	29.648	5.39665
MAX_5-S-1.nd2:0001-0512-0427	341.213	305.215		MAX_5-S-1.nd2	4	30.92	1.29366	2.97235
MAX_5-P-1.nd2:0001-0512-0515	490.162			MAX_3-P-1.nd2	8	30.942	2.58548	2.58548
MAX_4-S-1.nd2:0001-0512-0474	415.761			MAX_4-S-1.nd2	4	31.101	1.28613
MAX_4-P-1.nd2:0001-0512-0505	254.997	335.379		MAX_4-P-1.nd2	6	31.15	1.92616	1.60615
MAX_2-P-1.nd2:0001-0512-0490	478.6	478.6		MAX_2-P-1.nd2	11
MAX_1-S-1.nd2:0001-0512-0421	434.644			MAX_1-S-1.nd2	7	32.478	2.15531
MAX_1-P-1.nd2:0001-0474-0512	292.728	363.686		MAX_1-P-1.nd2	7	31.142	2.24777	2.20154
MAX_9-T-1.nd2:0001-0533-0512	500.565			MAX_9-T-1.nd2	14	31.219	4.48445
MAX_9-S-1.nd2:0001-0512-0635	329.709			MAX_9-S-1.nd2	12	32.546	3.68709
MAX_9-P-1.nd2:0001-0512-0525	374.702	401.659		MAX_9-P-1.nd2	6	31.168	1.92505	3.36553
MAX_8-T-1.nd2:0001-0512-0536	381.632			MAX_8-T-1.nd2	3	31.7	0.946372
MAX_8-S-1.nd2:0001-0461-0512	277.038			MAX_8-S-1.nd2	5	31.161	1.60457
MAX_8-P-1.nd2:0001-0519-0512	522.568	393.746		MAX_8-P-1.nd2	7	31.114	2.24979	1.60024
MAX_7-S-1.nd2:0001-0512-0484	498.253			MAX_7-S-1.nd2	4	58.108	0.688373
MAX_7-P-1.nd2:0001-0562-0512	322.521			MAX_7-P-1.nd2	7	31.641	2.21232
MAX_7-F-1.nd2:0001-0465-0512	400.405	407.06		MAX_7-F-1.nd2	6	34.485	1.73989	1.54686
MAX_6-T-1.nd2:0001-0512-0534	383.831			MAX_6-T-1.nd2	5	32.004	1.5623
MAX_6-S-1.nd2:0001-0512-0511	380.359			MAX_6-S-1.nd2	8	31.369	2.55029
MAX_6-P-1.nd2:0001-0465-0512	468.93	411.04		MAX_6-P-1.nd2	16	32.623	4.90452	3.0057
MAX_10-T-1.nd2:0001-0512-0474	492.491			MAX_10-T-1.nd2	7	30.101	2.3255
MAX_10-P-1.nd2:0001-0512-0664	501.409			MAX_10-P-1.nd2	6	31.866	1.88288
MAX_10-S-1.nd2:0001-0638-0463	488.743	494.214		MAX_10-S-1.nd2	5	29.042	1.72164	1.97668
GFP-2A-Cre +Y343A				GFP-2A-Cre +Y343A
MAX_3-T-1.nd2:0001-0512-0413	435.998			MAX_3-T-1.nd2	25	63.187	3.95651
MAX_3-S-1.nd2:0001-0512-0450	513.02			MAX_3-S-1.nd2	17	43.654	3.89426
MAX_3-P-1.nd2:0001-0512-0484	474.849	474.622		MAX_3-P-1.nd2	12	31.291	3.83497	3.89525
MAX_2-T-1.nd2:0512-0505	429.633			MAX_2-T-1.nd2	10	31.015	3.22425
MAX_2-S-1.nd2:0001-0512-0509	352.85			MAX_2-S-1.nd2	2	30.972	0.645745
MAX_2-P-1.nd2:0001-0539-0512	390.707	391.063		MAX_2-P-1.nd2	5	31.505	1.58705	1.81901
MAX_1-T-1.nd2:0001-0512-0536	441.486			MAX_1-T-1.nd2	10	31.623	3.16226
MAX_1-S-1.nd2:0001-0512-0484	576.36			MAX_1-S-1.nd2	15	30.947	4.847
MAX_1-F-1.nd2:0001-0512-0465	453.788			MAX_1-F-1.nd2	7	30.976	2.25981
MAX_1-P-1.nd2:0001-0474-0512	481.23	488.216		MAX_1-P-1.nd2	10	31.045	3.22113	3.37255
MAX_6-S-1.nd2:0001-0528-0512	337.247			MAX_6-S-1.nd2	4	29.754	1.34436
MAX_6-P-1.nd2:0001-0512-0440	363.713	350.48		MAX_6-P-1.nd2	4	30.762	1.30031	1.32233
MAX_5-T-1.nd2:0001-0512-0474	422.512			MAX_5-T-1.nd2	7	31.201	2.24352
MAX_5-S-1.nd2:0001-0512-0484	406.349			MAX_5-S-1.nd2	7	32.654	2.14369
MAX_5-P-1.nd2:0001-0423-0512	300.523	376.461		MAX_5-P-1.nd2	3	31.299	0.958497	1.7819
MAX_4-T-1.nd2:0001-0512-0503	359.557			MAX_4-T-1.nd2	7	32.2	2.17391
MAX_4-S-1.nd2:0001-0585-0512	414.382			MAX_4-S-1.nd2	14	30.617	4.57262
MAX_4-P-1.nd2:0001-0512-0637	397.805	390.581		MAX_4-P-1.nd2	12	53.15	2.25776	3.00143
MAX_8-T-1.nd2:0001-0534-0490	350.487			MAX_8-T-1.nd2	6	30.162	1.98926
MAX_8-S-1.nd2:0001-0546-0512	423.825			MAX_8-S-1.nd2	6	51.243	1.17089
MAX_8-P-1.nd2:0001-0437-0512	278.578	350.963		MAX_8-P-1.nd2	8	30.947	2.58506	1.91507
MAX_7-T-1.nd2:0001-0512-0508	363.732			MAX_7-T-1.nd2	6	30.488	1.96799
MAX_7-P-1.nd2:0001-0463-0512	323.088	343.41		MAX_7-P-1.nd2	6	30.652	1.95746	1.96272
MAX_12-T-1.nd2:0001-0525-0512	409.36			MAX_12-T-1.nd2	4	31.579	1.26666
MAX_12-S-1.nd2:0001-0512-0559	407.968			MAX_12-S-1.nd2	13	31.378	4.14303
MAX_12-P-1.nd2:0001-0432-0512	421.721	413.016		MAX_12-P-1.nd2	6	33.814	1.77441	2.3947
MAX_11-S-1.nd2:0001-0512-0510	544.142			MAX_11-S-1.nd2	17	31.396	5.4147
MAX_11-P-1.nd2:0001-0512-0439	587.59	565.866		MAX_11-P-1.nd2	11	31.35	3.50877	4.46174
MAX_10-S-1.nd2:0001-0512-0554	261.51			MAX_10-S-1.nd2	5	31.409	1.5919
MAX_10-P-1.nd2:0001-0512-0501	314.931			MAX_10-P-1.nd2	11	30.745	3.57782	2.58486
MAX_15-T-1.nd2:0001-0777-0545	397.367			MAX_15-T-1.nd2	7	30.509	2.2944
MAX_15-S-1.nd2:0001-0473-0512	380.605			MAX_15-S-1.nd2	7	31.329	2.23435
MAX_15-P-1.nd2:0001-0481-0512	324.663	367.545		MAX_15-P-1.nd2	17	31.947	5.32131	3.28336
MAX_14-T-1.nd2:0001-0512-0478	376.613			MAX_14-T-1.nd2	5	31.953	1.5648
MAX_14-S-1.nd2:0001-0512-0638	267.151			MAX_14-S-1.nd2	8	31.241	2.56074
MAX_14-P-1.nd2:0001-0512-0443	371.993			MAX_14-P-1.nd2	8	30.897	2.58925
MAX_14-F-1.nd2:0001-0512-0572	309.517	331.318		MAX_14-F-1.nd2	6	36.688	1.63541	2.08755
MAX_13-T-1.nd2:0001-0536-0512	417.217			MAX_13-T-1.nd2	8	30.732	2.60315
MAX_13-S-1.nd2:0001-0512-0400	378.916			MAX_13-S-1.nd2	8	31.728	2.52143
MAX_13-P-1.nd2:0001-0512-0323	334.269	376.801		MAX_13-P-1.nd2	7	31.855	2.19746	2.44068
MAX_18-T-1.nd2:0001-0515-0512	333.183			MAX_18-T-1.nd2	2	31.681	0.631293
MAX_18-S-1.nd2:0001-0426-0512	540.837	333.183		MAX_18-S-1.nd2	14	31.084	4.50392	2.56761
MAX_17-P-1.nd2:0001-0512-0523	384.58	384.58		MAX_17-P-1.nd2	10	32.99	3.03122	3.07797
MAX_16-T-1.nd2:0001-0561-0512	399.323			MAX_16-T-1.nd2	4	31.8	1.25786
MAX_16-S-1.nd2:0001-0545-0512	436.549			MAX_16-S-1.nd2	3	31.83	0.942507
MAX_16-P-1.nd2:0001-0481-0512	262.531	366.134		MAX_16-P-1.nd2	4	31.999	1.25004	1.15014
GFP + Vector				GFP + Vector
MAX_6-P-1.nd2:0002-0512-0571	665.553	665.553		MAX_6-P-1.nd2	22	31.898	6.89698	6.89698
MAX_5-S-1.nd2:0002-0378-0512	651.072			MAX_5-S-1.nd2	16	31.986	5.00219
MAX_5-P-1.nd2:0002-0512-0556	632.907	641.99		MAX_5-P-1.nd2	13	37.264	3.48862	4.24541
MAX_4-S-1.nd2:0002-0512-0608	764.568			MAX_4-S-1.nd2	33	31.193	10.5793
MAX_4-P-1.nd2:0002-0708-0512	938.791	851.679		MAX_4-P-1.nd2	63	31.378	20.0778	15.3285
MAX_3-S-1.nd2:0002-0512-0642	978.095			MAX_3-S-1.nd2	25	31.33	7.97957
MAX_3-P-1.nd2:0002-0542-0512	618.381	798.238		MAX_3-P-1.nd2	18	31.587	5.69855	6.83906
MAX_2-S-1.nd2:0002-0410-0512	720.991	720.991		MAX_2-S-1.nd2	17	32.372	5.25145	5.25145
MAX_1-P-1.nd2:0002-0557-0512	879.276			MAX_1-P-1.nd2	39	32.4	12.037
MAX_1-S-1.nd2:0002-0470-0512	736.572	807.924		MAX_1-S-1.nd2	20	35.395	5.65052	8.84378
GFP-2A-Cre + Vector				GFP-2A-Cre + Vector
MAX_4-S-1.nd2:0002-0512-0525	556.514			MAX_4-S-1.nd2	18	32.035	5.61885
MAX_4-P-1.nd2:0002-0512-0622	409.061	482.788		MAX_4-P-1.nd2	9	33.512	2.68561	4.15223
MAX_3-P-1.nd2:0002-0387-0512	469.026	469.026		MAX_3-P-1.nd2	6	31.519	1.90361	1.90361
MAX_2-S-1.nd2:0002-0512-0707	558.85			MAX_2-S-1.nd2	8	31.562	2.53469
MAX_2-P-1.nd2:0002-0512-0574	573.426	566.138		MAX_2-P-1.nd2	16	39.118	4.09019	3.31244
MAX_1-T-1.nd2:0002-0464-0512	347.004			MAX_1-T-1.nd2	10	34.207	2.92338
MAX_1-S-1.nd2:0002-0429-0512	455.866			MAX_1-S-1.nd2	10	31.239	3.20113
MAX_1-P-1.nd2:0002-0512-0516	550.159	451.01		MAX_1-P-1.nd2	10	31.194	3.20574	3.11008
GFP-2A-Cre + aa172-352				GFP-2A-Cre + aa172-352
MAX_12-P-1.nd2:0002-0459-0512	522.385	522.385		MAX_12-P-1.nd2	12	33.635	3.56771	3.56771
MAX_11-T-1.nd2:0002-0673-0512	577.464			MAX_11-T-1.nd2	9	30.906	2.91206
MAX_11-S-1.nd2:0002-0505-0512	647.7			MAX_11-S-1.nd2	28	48.68	5.75185
MAX_11-P-1.nd2:0002-0512-0664	651.532	625.565		MAX_11-P-1.nd2	12	31.385	3.82348	4.16246
MAX_10-S-1.nd2:0002-0402-0512	542.164			MAX_10-S-1.nd2	29	31.385	9.24008
MAX_10-P-1.nd2:0002-0627-0512	546.306	544.235		MAX_10-P-1.nd2	9	32.819	2.74231	5.9912
MAX_9-S-1.nd2:0002-0363-0509	456.266			MAX_9-S-1.nd2	22	31.138	7.06532
MAX_9-P-1.nd2:0002-0322-0512	421.398	438.832		MAX_9-P-1.nd2	26	29.899	8.69594	7.88063
MAX_8-T-1.nd2:0002-0762-0512	609.168			MAX_8-T-1.nd2	6	30.557	1.96354
MAX_8-P-1.nd2:0002-0512-0417	640.403	624.785		MAX_8-P-1.nd2	21	32.596	6.44251	4.20303
MAX_7-S-1.nd2:0002-0512-0610	715.444			MAX_7-S-1.nd2	31	36.297	8.54065
MAX_7-P-1.nd2:0002-0512-0685	597.213	656.328		MAX_7-P-1.nd2	13	31.892	4.07626	6.30845
MAX_6-S-1.nd2:0002-0512-0767	414.061			MAX_6-S-1.nd2	7	32.658	2.14343
MAX_6-P-1.nd2:0002-0358-0512	542.367	478.214		MAX_6-P-1.nd2	12	32.228	3.72347	2.93345
MAX_5-S-1.nd2:0002-0512-0616	768.189			MAX_5-S-1.nd2	11	31.229	3.52237
MAX_5-P-1.nd2:0002-0575-0512	611.113	689.651		MAX_5-P-1.nd2	5	30.502	1.63924	2.5808
MAX_4-S-1.nd2:0002-0612-0512	656.518	656.518		MAX_4-S-1.nd2	23	31.563	7.28701
MAX_3-S-1.nd2:0002-0554-0512	532.98			MAX_4-P-1.nd2	21	34.807	6.03327	6.66014
MAX_3-P-1.nd2:0002-0543-0526	801.43	667.205		MAX_3-S-1.nd2	11	31.467	3.49573
MAX_2-P-1.nd2:0002-0512-0610	839.919	839.919		MAX_3-P-1.nd2	27	34.104	7.91696	5.70634
MAX_1-T-1.nd2:0002-0658-0512	543.866			MAX_2-P-1.nd2	16	31.66	5.0537	5.0537
MAX_1-S-1.nd2:0002-0412-0512	639.731			MAX_1-T-1.nd2	24	31.422	7.63796
MAX_1-P-1.nd2:0002-0454-0512	645.863	609.82		MAX_1-S-1.nd2	16	31.2	5.12821
				MAX_1-P-1.nd2	23	31.318	7.34402	6.7034
GFP-2A-Cre + KKK-EEE				GFP-2A-Cre + KKK-EEE
MAX_4-T-1.nd2:0002-0473-0512	509.68			MAX_4-T-1.nd2	22	30.936	7.11146
MAX_4-S-1.nd2:0002-0512-0699	443.826			MAX_4-S-1.nd2	9	31.629	2.84549
MAX_4-P-1.nd2:0002-0655-0512	335.964	429.823		MAX_4-P-1.nd2	29	31.351	9.2501	6.40235
MAX_3-T-1.nd2:0002-0512-0585	546.258			MAX_3-T-1.nd2	16	35.734	4.47753
MAX_3-S-1.nd2:0002-0512-0734	513.538	546.258		MAX_3-S-1.nd2	13	43.051	3.01967	3.7486
MAX_2-T-1.nd2:0002-0538-0512	584.045			MAX_2-T-1.nd2	9	31.116	2.8924
MAX_2-S-1.nd2:0002-0530-0512	449.29			MAX_2-S-1.nd2	15	34.256	4.37879
MAX_2-P-1.nd2:0002-0455-0512	479.532	504.289		MAX_2-P-1.nd2	11	31.701	3.46992	3.58037
MAX_1-S-1.nd2:0002-0512-0654	425.108			MAX_1-S-1.nd2	9	30.784	2.9236
MAX_1-P-1.nd2:0002-0512-0641	415.233	420.171		MAX_1-P-1.nd2	10	31.374	3.18735	3.05547
GFP-2A-Cre + p140Cap				GFP-2A-Cre + p140Cap
MAX_10-S-1.nd2:0002-0512-0638	448.519			MAX_10-S-1.nd2	17	32.387	5.24902
MAX_10-P-1.nd2:0002-0512-0571	413.139	430.829		MAX_10-P-1.nd2	11	42.456	2.59092	3.91997
MAX_9-T-1.nd2:0002-0525-0512	203.281			MAX_9-T-1.nd2	13	54.291	2.3945
MAX_9-S-1.nd2:0002-0431-0512	179.999			MAX_9-S-1.nd2	8	31.01	2.57981
MAX_9-P-1.nd2:0002-0512-0661	172.83	185.37		MAX_9-P-1.nd2	10	34.695	2.88226	2.61886
MAX_8-T-1.nd2:0002-0530-0512	252.247			MAX_8-T-1.nd2	10	31.237	3.20133
MAX_8-S-1.nd2:0002-0512-0639	278.319			MAX_8-S-1.nd2	15	38.089	3.93814
MAX_8-P-1.nd2:0002-0584-0512	317.35	282.639		MAX_8-P-1.nd2	13	33.303	3.90355	3.68101
MAX_7-T-1.nd2:0002-0512-0633	296.006			MAX_7-T-1.nd2	10	32.279	3.09799
MAX_7-S-1.nd2:0002-0512-0597	253.973			MAX_7-S-1.nd2	14	42.503	3.29389
MAX_7-P-1.nd2:0002-0410-0512	241.369	263.783		MAX_7-P-1.nd2	9	30.813	2.92085	3.10424
MAX_6-T-1.nd2:0002-0536-0512	313.661			MAX_6-S-1.nd2	20	43.981	4.54742
MAX_6-S-1.nd2:0002-0512-0683	437.498			MAX_6-P-1.nd2	9	31.176	2.88684	3.71713
MAX_6-P-1.nd2:0002-0512-0690	419.079	390.079		MAX_5-T-1.nd2	11	31.677	3.47255
MAX_5-T-1.nd2:0002-0512-0668	435.082			MAX_5-S-1.nd2	6	32.683	1.83582
MAX_5-S-1.nd2:0002-0623-0512	351.344			MAX_5-P-1.nd2	25	30.947	8.07833	4.46223
MAX_5-P-1.nd2:0002-0512-0610	434.203	406.876		MAX_4-T-1.nd2	11	38.487	2.85811
MAX_4-T-1.nd2:0002-0636-0512	398.789			MAX_4-P-1.nd2	9	31.53	2.85442	2.85627
MAX_4-P-1.nd2:0002-0420-0512	282.46	340.625		MAX_3-T-1.nd2	8	31.519	2.53815
MAX_3-T-1.nd2:0002-0512-0666	318.873			MAX_3-S-1.nd2	5	51.553	0.969876
MAX_3-S-1.nd2:0002-0693-0512	315.269			MAX_3-P-1.nd2	11	30.901	3.55976
MAX_3-P-1.nd2:0002-0706-0512	325.649			MAX_3-F-1.nd2	14	34.451	4.06374	2.78288
MAX_3-F-1.nd2:0002-0479-0512	388.351	337.036		MAX_2-S-1.nd2	6	32.126	1.86765
MAX_2-p-1.nd2:0002-0512-0642	411.431	411.431		MAX_2-p-1.nd2	18	63.71	2.8253	2.34647
MAX_1-T-1.nd2:0002-0512-0680	402.041			MAX_1-T-1.nd2	9	32.688	2.7533
MAX_1-S-1.nd2:0002-0512-0796	448.856			MAX_1-S-1.nd2	25	42.902	5.82723
MAX_1-p-1.nd2:0002-0509-0512	517.812			MAX_1-p-1.nd2	16	30.72	5.20833
MAX_1-F-1.nd2:0002-0512-0632	363.642	433.088		MAX_1-F-1.nd2	9	31.853	2.82548	4.15359
GFP + Vector				GFP + Vector
MAX_1-F-1.nd2:0001-0512-0512	509.057			MAX_1-F-1.nd2	15	32.073	4.67683
MAX_1-P-1.nd2:0001-0469-0512	443.839			MAX_1-P-1.nd2	19	31.198	6.09013
MAX_1-S-1.nd2:0001-0512-0619	591.301			MAX_1-S-1.nd2	11	32.676	3.36639
MAX_1-T-1.nd2:0001-0491-0512	417.038	490.309		MAX_1-T-1.nd2	5	31.159	1.60467	3.93451
MAX_3-P-1.nd2:0001-0572-0512	623.937			MAX_3-P-1.nd2	26	31.066	8.36928
MAX_3-S-1.nd2:0001-0561-0512	548.503	586.22		MAX_3-S-1.nd2	18	31.238	5.76221	7.06575
MAX_4-F-1.nd2:0001-0512-0647	473.409			MAX_4-F-1.nd2	14	35.847	3.90549
MAX_4-p-1.nd2:0001-0512-0481	773.534			MAX_4-p-1-1.nd2	32	38.723	8.26382
MAX_4-P1-1.nd2:0001-0482-0512	634.282			MAX_4-P1-1.nd2	35	31.598	11.0767
MAX_4-S-1.nd2:0001-0532-0512	542.996			MAX_4-S-1.nd2	23	30.563	7.52544
MAX_4-T-1.nd2:0001-0639-0512	782.985			MAX_4-T-1.nd2	21	30.424	6.90245
MAX_4-T1-1.nd2:0001-0512-0632	470.255	612.91		MAX_4-T1-1.nd2	10	31.701	3.15447	6.80472
MAX_5-F-1.nd2:0001-0512-0697	442.36			MAX_5-F-1.nd2	14	35.727	3.9186
MAX_5-P-1.nd2:0001-0527-0512	360.333			MAX_5-P-1.nd2	55	34.189	16.087
MAX_5-P1-1.nd2:0001-0512-0619	525.793			MAX_5-P1-1.nd2	19	34.062	5.57806
MAX_5-S-1.nd2:0001-0512-0683	452.394			MAX_5-S-1.nd2	25	40.062	6.24033
MAX_5-T-1.nd2:0001-0512-0617	463.264	448.829		MAX_5-T-1.nd2	28	41.596	6.73142	7.71109
MAX_6-P-1.nd2:0001-0512-0338	379.666			MAX_6-P-1.nd2	60	48.02	12.4948
MAX_6-S-1.nd2:0001-0512-0629	444.367	412.017		MAX_6-S-1.nd2	7	30.663	2.28288	7.38884
MAX_7-P-1.nd2:0001-0512-0610	314.198			MAX_7-P-1.nd2	25	31.127	8.03161
MAX_7-S-1.nd2:0001-0512-0655	469.647			MAX_7-S-1.nd2	21	31.701	6.6244
MAX_7-S1-1.nd2:0001-0536-0512	587.112			MAX_7-S1-1.nd2	22	31.035	7.08877
MAX_7-T-1.nd2:0001-0512-0407	424.546	448.876		MAX_7-T-1.nd2	19	42.981	4.42056	6.54133
MAX_8-F-1.nd2:0001-0512-0509	449.672			MAX_8-F-1.nd2	26	31.532	8.24559
MAX_8-P-1.nd2:0001-0512-0737	387.415			MAX_8-P-1.nd2	50	46.929	10.6544
MAX_8-S-1.nd2:0001-0512-0673	568.984			MAX_8-S-1.nd2	26	31.358	8.29135
MAX_8-S1-1.nd2:0001-0656-0512	407.29			MAX_8-S1-1.nd2	17	45.789	3.71268
MAX_8-S-1.nd2:0001-0512-0630	546.555	471.983		MAX_8-S-1.nd2	29	31.081	9.33046	8.04689
MAX_9-F-1.nd2:0001-0576-0512	430.564			MAX_9-F-1.nd2	22	30.981	7.10113
MAX_9-P-1.nd2:0001-0490-0512	512.545			MAX_9-P-1.nd2	29	30.723	9.43918
MAX_9-S-1.nd2:0001-0450-0512	507.155			MAX_9-S-1.nd2	38	31.159	12.1955
MAX_9-S1-1.nd2:0001-0548-0512	549.274			MAX_9-S1-1.nd2	34	31.083	10.9385
MAX_9-T-1.nd2:0001-0602-0520	473.949	494.697		MAX_9-T-1.nd2	24	30.471	7.87634	9.51012
GFP-2A-Cre + Vector				GFP-2A-Cre + Vector
MAX_1-S-1.nd2:0001-0512-0504	382.1	382.1		MAX_1-S-1.nd2	8	31.514	2.53855	2.53855
MAX_2-F-1.nd2:0001-0512-0412	450.06			MAX_2-F-1.nd2	10	30.843	3.24223
MAX_2-P-1.nd2:0001-0512-0409	358.956			MAX_2-P-1.nd2	24	54.031	4.44189
MAX_2-S-1.nd2:0001-0536-0452	384.782			MAX_2-S-1.nd2	18	29.517	6.09818
MAX_2-T-1.nd2:0001-0512-0486	403.15	399.237		MAX_2-T-1.nd2	12	43.549	2.75552	4.13445
MAX_3-F-1.nd2:0001-0512-0486	361.361			MAX_3-F-1.nd2	2	30.863	0.648025
MAX_3-P-1.nd2:0001-0512-0510	279.641			MAX_3-P-1.nd2	9	33.637	2.67563
MAX_3-S-1.nd2:0001-0512-0745	376.701			MAX_3-S-1.nd2	6	31.625	1.89723
MAX_3-T-1.nd2:0001-0512-0486	378.467	349.043		MAX_3-T-1.nd2	10	31.181	3.20708	2.10699
MAX_4-P-1.nd2:0001-0595-0512	439.584			MAX_4-P-1.nd2	17	31.946	5.32148
MAX_4-P1-1.nd2:0001-0455-0512	410.117			MAX_4-P1-1.nd2	26	31.591	8.23019
MAX_4-S-1.nd2:0001-0487-0474	533.93			MAX_4-S-1.nd2	14	31.144	4.49525
MAX_4-T-1.nd2:0001-0508-0512	427.78	452.853		MAX_4-T-1.nd2	12	31.514	3.80783	5.46369
MAX_5-F-1.nd2:0001-0512-0505	357.207			MAX_5-F-1.nd2	8	31.727	2.52151
MAX_5-P-1.nd2:0001-0325-0512	267.604			MAX_5-P-1.nd2	15	42.78	3.50631
MAX_5-S-1.nd2:0001-0512-0423	299.689			MAX_5-S-1.nd2	8	31.474	2.54178
MAX_5-S1-1.nd2:0001-0514-0512	263.301	303.194		MAX_5-S1-1.nd2	10	31.722	3.15239
MAX_5-T-1.nd2:0001-0509-0512	328.171			MAX_5-T-1.nd2	6	32.029	1.8733	2.71906
MAX_6-P-1.nd2:0001-0512-0568	319.803			MAX_6-P-1.nd2	10	31.273	3.19765
MAX_6-S-1.nd2:0001-0555-0643	397.876			MAX_6-S-1.nd2	6	28.416	2.11149
MAX_6-T-1.nd2:0001-0512-0587	330.732	349.47		MAX_6-T-1.nd2	5	63.173	0.791477	2.03354
GFP-2A-Cre +EndoA1				GFP-2A-Cre +EndoA1
MAX_1-P-1.nd2	76.926			MAX_1-P-1.nd2	28	31.155	8.98732
MAX_1-S-1.nd2	89.583	410.241		MAX_1-S-1.nd2	32	31.983	10.0053	9.49632
MAX_2-F-1.nd2	32.756			MAX_2-F-1.nd2	11	30.536	3.60231
MAX_2-p-1.nd2	77.523			MAX_2-p-1.nd2	9	48.943	1.83887
MAX_2-S-1.nd2	38.257			MAX_2-S-1.nd2	9	31.627	2.84567
MAX_2-T-1.nd2	29.293	395.038		MAX_2-T-1.nd2	6	31.872	1.88253	2.54234
MAX_3-F-1.nd2	45.726			MAX_3-F-1.nd2	13	31.779	4.09075
MAX_3-P-1.nd2	62.376			MAX_3-P-1.nd2	33	30.748	10.7324
MAX_3-S-1.nd2	48.444			MAX_3-S-1.nd2	31	31.557	9.82349
MAX_3-T-1.nd2	43.275	582.149		MAX_3-T-1.nd2	17	33.491	5.07599	7.43066
MAX_4-P-1.nd2	90.841			MAX_4-P-1.nd2	24	46.378	5.17487
MAX_4-S-1.nd2	57.864			MAX_4-S-1.nd2	19	31.254	6.07922
MAX_4-T-1-1.nd2	37.761	471.011		MAX_4-T-1-1.nd2	10	30.86	3.24044	4.83151
MAX_5-P-1.nd2	50.926			MAX_5-P-1.nd2	12	31.756	3.77881
MAX_5-S-1.nd2	73.71			MAX_5-S-1.nd2	27	30.551	8.83768
MAX_5-T-1.nd2	49.963	399.536		MAX_5-T-1.nd2	21	31.684	6.62795	6.41482
MAX_6-F-1.nd2	57.457			MAX_6-F-1.nd2	9	29.432	3.0579
MAX_6-P-1.nd2	87.454			MAX_6-P-1.nd2	20	31.687	6.31174
MAX_6-S-1.nd2	62.276			MAX_6-S-1.nd2	26	31.305	8.30538
MAX_6-T-1.nd2	41.815	401.563		MAX_6-T-1.nd2	26	32.198	8.07504	6.43751
GFP + Vector				GFP + Vector
MAX_1-P-1.nd2:0001-0512-0487	623.835			MAX_1-P-1.nd2	32	31.621	10.1199
MAX_1-S-1.nd2:0001-0512-0487	529.921			MAX_1-S-1.nd2	27	32.634	8.27358
MAX_1-T-1.nd2:0001-0512-0411	438.698	530.818		MAX_1-T-1.nd2	5	42.236	1.18382	6.52575
MAX_2-P-1.nd2:0001-0423-0512	724.781			MAX_2-P-1.nd2	34	30.242	11.2426
MAX_2-S-1.nd2:0001-0512-0424	455.672			MAX_2-S-1.nd2	26	33.157	7.84148
MAX_2-T-1.nd2:0001-0512-0459	372.898	517.784		MAX_2-T-1.nd2	6	29.022	2.0674	7.0505
MAX_3-P-1.nd2:0001-0285-0512	503.614			MAX_3-P-1.nd2	26	44.369	5.85995
MAX_3-T-1.nd2:0001-0512-0492	578.323	540.968		MAX_3-T-1.nd2	15	35.636	4.20923	5.03459
MAX_4-P-1.nd2:0001-0512-0578	635.897			MAX_4-P-1.nd2	28	31.316	8.94112
MAX_4-S-1.nd2:0001-0512-0489	577.415			MAX_4-S-1.nd2	30	32.747	9.16114
MAX_4-S1-1.nd2:0001-0512-0483	694.081			MAX_4-S1-1.nd2	27	33.27	8.11542
MAX_4-T-1.nd2:0001-0512-0538	548.411	613.951		MAX_4-T-1.nd2	8	31.747	2.51992	7.18439
MAX_5-F-1.nd2:0001-0354-0512	483.541			MAX_5-F-1.nd2	11	48.242	2.28017
MAX_5-P-1.nd2:0001-0498-0512	594.801			MAX_5-P-1.nd2	30	30.195	9.93542
MAX_5-S-1.nd2:0001-0517-0512	659.022			MAX_5-S-1.nd2	36	31.299	11.502
MAX_5-S1-1.nd2:0001-0465-0512	597.694	583.764		MAX_5-S1-1.nd2	47	32.902	14.2848	9.50064
MAX_6-F-1.nd2:0001-0512-0552	433.306			MAX_6-F-1.nd2	19	31.707	5.99237
MAX_6-P-1.nd2:0001-0512-0471	571.422			MAX_6-P-1.nd2	60	31.081	19.3044
MAX_6-S-1.nd2:0001-0512-0665	635.321			MAX_6-S-1.nd2	42	31.582	13.2987
MAX_6-T-1.nd2:0001-0508-0512	647.515	571.891		MAX_6-T-1.nd2	18	35.1331	5.12337	10.9297
MAX_7-F-1.nd2:0001-0512-0555	610.067			MAX_7-F-1.nd2	44	31.997	13.7513
MAX_7-F1-1.nd2:0001-0512-0314	670.023			MAX_7-F1-1.nd2	23	31.754	7.24318
MAX_7-P-1.nd2:0001-0467-0512	795.288			MAX_7-P-1.nd2	49	30.753	15.9334
MAX_7-S-1.nd2:0001-0512-0473	601.701			MAX_7-S-1.nd2	23	30.812	7.46462
MAX_7-T-1.nd2:0001-0512-0519	1517.28	838.872		MAX_7-T-1.nd2	43	32.044	13.419	11.5623
MAX_8-P-1.nd2:0001-0450-0512	654.654	654.654		MAX_8-P-1.nd2	55	30.843	17.8322
MAX_9-F-1.nd2:0512-0584	414.102			MAX_9-F-1.nd2	19	31.599	6.01285
MAX_9-P-1-1.nd2:0001-0512-0507	542.451			MAX_9-P-1.nd2	53	30.921	17.1405
MAX_9-S-1.nd2:0001-0512-0534	422.588			MAX_9-S-1.nd2	24	31.188	7.69527
MAX_9-T-1.nd2:0001-0495-0512	384.817	440.99		MAX_9-T-1.nd2	18	40.959	4.39464	10.6151
MAX_10-F-1.nd2:0001-0512-0441	553.358			MAX_10-F-1.nd2	26	33.455	7.77163
MAX_10-P-1.nd2:0001-0512-0605	799.459			MAX_10-P-1.nd2	111	31.889	34.8082
MAX_10-S-1.nd2:0001-0512-0441	827.409			MAX_10-S-1.nd2	110	50.886	21.6169
MAX_10-T-1.nd2:0001-0512-0590	848.607	757.208		MAX_10-T-1.nd2	30	48.251	6.21749	17.6036
MAX_11-P-1.nd2:0001-0512-0494	541.997			MAX_11-P-1.nd2	25	31.329	7.97983
MAX_11-P-1.nd2:0001-0512-0532	529.201			MAX_11-P-1.nd2	29	31.489	9.20957
MAX_11-P1-1.nd2:0001-0512-0578	437.872			MAX_11-P1-1.nd2	43	31.662	13.5809
MAX_11-S-1.nd2:0001-0347-0512	454.796			MAX_11-S-1.nd2	21	30.533	6.8778
MAX_11-T-1.nd2:0001-0512-0486	437.72	480.317		MAX_11-T-1.nd2	14	33.335	4.19979	8.36958
MAX_12-P-1.nd2:0001-0512-0482	593.765	593.765		MAX_12-P-1.nd2:0001-0512-0482
GFP-2A-Cre + Vector				GFP-2A-Cre + Vector
MAX_1-P-1.nd2	430.378			MAX_1-P-1.nd2	27	44.533	6.06292
MAX_1-S-1.nd2	338.093			MAX_1-S-1.nd2	9	31.155	2.88878
MAX_1-S1-1.nd2	463.379			MAX_1-S1-1.nd2	16	41.298	3.87428
MAX_1-T-1.nd2	496.093			MAX_1-T-1.nd2	25	61.521	4.06365
MAX_1-T1-1.nd2	394.162	424.421		MAX_1-T1-1.nd2	7	33.648	2.08036	3.794
MAX_2-P-1.nd2	553.296			MAX_2-P-1.nd2	30	31.533	9.51384
MAX_2-S-1.nd2	585.548			MAX_2-S-1.nd2	16	31.778	5.03493
MAX_2-TS-1.nd2	340.135	492.993		MAX_2-TS-1.nd2	9	39.722	2.26575	5.60483
MAX_3-P-1.nd2	582.482			MAX_3-P-1.nd2	33	47.689	6.91983
MAX_3-S-1.nd2	492.557			MAX_3-S-1.nd2	25	31.322	7.98161
MAX_3-T-1.nd2	517.328	530.789		MAX_3-T-1.nd2	15	32.386	4.63163	6.51103
MAX_4-F-1.nd2	393.628			MAX_4-F-1.nd2	10	42.284	2.36496
MAX_4-F-1.nd2	390.366			MAX_4-F-1.nd2	11	31.721	3.46773
MAX_4-S-1.nd2	445.075			MAX_4-S-1.nd2	24	31.784	7.55097
MAX_4-T-1.nd2	303.511	383.145		MAX_4-T-1.nd2	8	31.588	2.53261	3.97906
MAX_5-P-1.nd2	238.783			MAX_5-P-1.nd2	6	31.872	1.88253
MAX_5-S-1.nd2	394.365			MAX_5-S-1.nd2	20	30.622	6.53125
MAX_5-T-1.nd2	301.067	311.405		MAX_5-T-1.nd2	5	36.648	1.36433	3.25937
MAX_6-F-1.nd2	274.928			MAX_6-F-1.nd2	10	31.746	3.15
MAX_6-F-1.nd2	281.752			MAX_6-F-1.nd2	4	30.818	1.29794
MAX_6-P-1.nd2	384.781			MAX_6-P-1.nd2	11	31.254	3.51955
MAX_6-S-1.nd2	308.806	303.371		MAX_6-S-1.nd2	10	30.587	3.26936
MAX_6-T-1-1.nd2	266.588			MAX_6-T-1-1.nd2	10	32.877	3.04164	2.85569
MAX_7-P-1.nd2	452.169			MAX_7-P-1.nd2	47	30.803	15.2583
MAX_7-S-1.nd2	435.329			MAX_7-S-1.nd2	16	34.941	4.57915
MAX_7-S1-1.nd2	465.902			MAX_7-S1-1.nd2	21	30.997	6.77485
MAX_7-T-1.nd2	359.831			MAX_7-T-1.nd2	33	30.355	10.8714
MAX_7-T1-1.nd2	386.263	419.899		MAX_7-T1-1.nd2	12	33.415	3.5912	8.21495
MAX_8-P-1.nd2	353.767			MAX_8-P-1.nd2	31	30.321	10.2239
MAX_8-S-1.nd2	491.856			MAX_8-S-1.nd2	26	31.589	8.23071
MAX_8-T-1.nd2	434.779	426.801		MAX_8-T-1.nd2	15	34.3175	4.37095	7.60853
MAX_9-P-1.nd2	261.565			MAX_9-P-1.nd2	4	30.164	1.32608
MAX_9-S-1.nd2	380.544			MAX_9-S-1.nd2	14	30.753	4.5524
MAX_9-T-1.nd2	501.638	381.249		MAX_9-T-1.nd2	10	41.93	2.38493	2.75447
MAX_10-F-1.nd2	375.773			MAX_10-F-1.nd2	20	32.772	6.10277
MAX_10-P-1.nd2	301.612			MAX_10-P-1.nd2	15	30.445	4.92692
MAX_10-S-1.nd2	325.734			MAX_10-S-1.nd2	7	31.167	2.24597
MAX_10-T-1.nd2	396.608	349.932		MAX_10-T-1.nd2	15	42.369	3.54032	4.20399
GFP-2A-Cre +EndoA1				GFP-2A-Cre +EndoA1
MAX_1-F-1.nd2	548.443			MAX_1-F-1.nd2	30	30.437	9.85642
MAX_1-P-1.nd2	736.379			MAX_1-P-1.nd2	90	56.899	15.8175
MAX_1-S-1.nd2	617.283			MAX_1-S-1.nd2	86	32.364	26.5727
MAX_1-T-1.nd2	543.189	611.323		MAX_1-T-1.nd2	32	32.484	9.851	15.5244
MAX_2-F-1.nd2	721.263			MAX_2-F-1.nd2	67	61.673	10.8637
MAX_2-P-1.nd2	786.651			MAX_2-P-1.nd2	63	31.238	20.1677
MAX_2-S-1.nd2	844.684			MAX_2-S-1.nd2	59	30.276	19.4874
MAX_2-T-1.nd2	728.528	770.282		MAX_2-T-1.nd2	40	31.369	12.7514	15.8175
MAX_3-F-1.nd2	568.429			MAX_3-F-1.nd2	32	31.192	10.259
MAX_3-P-1.nd2	520.029			MAX_3-P-1.nd2	46	31.293	14.6998
MAX_3-S-1.nd2	572.378			MAX_3-S-1.nd2	47	31.103	15.1111
MAX_3-T-1.nd2	646.143	576.745		MAX_3-T-1.nd2	35	33.659	10.3984	12.6171
MAX_5-P-1.nd2	607.851			MAX_5-P-1.nd2	24	33.218	7.225
MAX_5-S-1.nd2	465.333	536.592		MAX_5-S-1.nd2	16	31.835	5.02591	6.12544
MAX_6-F-1.nd2	518.607			MAX_6-F-1.nd2	18	30.563	5.88947
MAX_6-P-1.nd2	497.801			MAX_6-P-1.nd2	18	31.934	5.63663
MAX_6-S-1.nd2	418.828			MAX_6-S-1.nd2	12	36.487	3.28884
MAX_6-T-1.nd2	458.842	473.519		MAX_6-T-1.nd2	6	34.152	1.75685	4.14295
MAX_7-P-1.nd2	461.032			MAX_7-P-1.nd2	34	31.361	10.8415
MAX_7-P1-1.nd2	492.777			MAX_7-P1-1.nd2	20	30.988	6.45411
MAX_7-S-1.nd2	336.936			MAX_7-S-1.nd2	11	31.092	3.53789
MAX_7-T-1.nd2	576.277	466.755		MAX_7-T-1.nd2	24	31.869	7.53083	7.09108
MAX_8-F-1.nd2	547.975			MAX_8-F-1.nd2	16	31.123	5.14089
MAX_8-S-1.nd2	610.647			MAX_8-S-1.nd2	46	30.042	15.3119
MAX_8-S1nd2-1.nd2	672.174			MAX_8-S1nd2-1.nd2	78	30.592	25.4969
MAX_8-T-1.nd2	632.856			MAX_8-T-1.nd2	29	32.632	8.88698
MAX_8-T1-1.nd2	707.182	634.167		MAX_8-T1-1.nd2	67	31.606	21.1985	15.207
MAX_9-F-1.nd2	575.861			MAX_9-F-1.nd2	32	31.481	10.1649
MAX_9-P-1.nd2	776.663			MAX_9-P-1.nd2	63	30.392	20.7291
MAX_9-S-1.nd2	653.758			MAX_9-S-1.nd2	31	46.103	6.72407
MAX_9-S1-1.nd2	566.832			MAX_9-S1-1.nd2	33	28.032	11.7723
MAX_9-T-1.nd2	586.697	631.962		MAX_9-T-1.nd2	36	34.937	10.3043	11.9389
MAX_10-F-1.nd2	630.756			MAX_10-F-1.nd2	20	37.103	5.3904
MAX_10-P-1.nd2	525.843			MAX_10-P-1.nd2	41	57.804	7.09293
MAX_10-S-1.nd2	504.012	553.537		MAX_10-S-1.nd2	13	32.922	3.94873	5.47734
MAX_11-F-1.nd2	615.876			MAX_11-F-1.nd2	31	30.706	10.0957
MAX_11-P-1.nd2	606.745			MAX_11-P-1.nd2	39	31.588	12.3465
MAX_11-S-1.nd2	537.833			MAX_11-S-1.nd2	32	31.405	10.1895
MAX_11-T-1.nd2	820.843			MAX_11-T-1.nd2	34	31.563	10.7721
MAX_11-T1-1.nd2	737.926	663.845		MAX_11-T1-1.nd2	38	34.889	10.8917	10.8591

## Sheet: Fig 7D_normalize
mean intensity																					number
GFP + Vector	GFP-2A-Cre +vector	GFP-2A-Cre +EndoA1	GFP-2A-Cre +p140Cap	GFP-2A-Cre + KKK-EEE	GFP-2A-Cre + Y343A	ave	GFP + Vector	GFP-2A-Cre +vector	GFP-2A-Cre +EndoA1	GFP-2A-Cre +p140Cap	GFP-2A-Cre + KKK-EEE	GFP-2A-Cre + Y343A		GFP + Vector	GFP-2A-Cre +vector	GFP-2A-Cre +EndoA1	GFP-2A-Cre +p140Cap	GFP-2A-Cre + KKK-EEE	GFP-2A-Cre + Y343A		GFP + Vector	GFP-2A-Cre +vector	GFP-2A-Cre +EndoA1	GFP-2A-Cre +p140Cap	GFP-2A-Cre + KKK-EEE	GFP-2A-Cre + Y343A	ave	GFP + Vector	GFP-2A-Cre +vector	GFP-2A-Cre +EndoA1	GFP-2A-Cre +p140Cap	GFP-2A-Cre + KKK-EEE	GFP-2A-Cre + Y343A		GFP + Vector	GFP-2A-Cre +vector	GFP-2A-Cre +EndoA1	GFP-2A-Cre +p140Cap	GFP-2A-Cre + KKK-EEE	GFP-2A-Cre + Y343A
839.959	531.477	691.279		682.467	508.856	592.716	1.41714	0.89668	1.16629		1.15142	0.858515		1.41714	0.89668	1.16629	0.889653	0.858515	1.15142		6.63168	8.3483	12.8674		6.28919	8.79489	8.96939	0.739368	0.930755	1.43459		0.701184	0.980545		0.739368	0.930755	1.42883	0.910044	0.980545	0.701184
758.189	493.632	584.705		609.265	500.54	592.716	1.27918	0.83283	0.986484		1.02792	0.844485		1.03717	0.83283	0.986484	0.747273	0.844485	1.02792		7.16495	7.73204	12.8157		7.23549	5.45822	8.96939	0.798822	0.862047	1.42883		0.806687	0.608539		0.570419	0.862047	1.42951	0.813582	0.608539	0.806687
614.746	427.354	555.317		530.708	446.902	592.716	1.03717	0.721009	0.936901		0.895383	0.75399		0.966115	0.721009	0.936901	0.665261	0.75399	0.895383		5.11631	6.61672	12.8219		6.74964	3.58161	8.96939	0.570419	0.7377	1.42951		0.75252	0.399315		1.07642	0.7377	0.694013	0.74798	0.399315	0.75252
584.521	424.971	552.781		485.006	446.212	592.716	0.986173	0.716989	0.932623		0.818277	0.752826		0.896729	0.716989	0.897758	0.652122	0.752826	0.818277		7.30101	5.69581	6.22487		5.85629	4.68669	8.96939	0.813992	0.635028	0.694013		0.65292	0.522521		1.31001	0.635028	0.469397	0.686839	0.522521	0.65292
572.632	420.443	532.115		483.146	445.539	592.716	0.966115	0.709349	0.897758		0.815139	0.75169		0.817169	0.709349	0.839343	0.614643	0.75169	0.815139		9.65486	4.27224	4.2102		10.8587	2.39779	8.96939	1.07642	0.476313	0.469397		1.21064	0.26733		1.30166	0.476313	0.80342	0.441621	0.26733	1.21064
541.669	383.642	497.492		480.286	409.319	592.716	0.913877	0.64726	0.839343		0.810313	0.690582		1.17477	0.64726	0.800137	0.600442	0.690582	0.810313		11.1071	4.04365	7.20619		4.42521	3.49165	8.96939	1.23834	0.450828	0.80342		0.493368	0.389285		1.403	0.450828	1.28029	0.428431	0.389285	0.493368
531.506	381.743	474.254		475.594	368.017	592.716	0.896729	0.644057	0.800137		0.802397	0.6209		1.07977	0.644057	0.771512	0.554366	0.6209	0.802397		11.75	3.85559	11.4834		3.02482	4.77425	8.96939	1.31001	0.429861	1.28029		0.337238	0.532282		1.21941	0.429861	1.20644	0.395098	0.532282	0.337238
518.455	350.385	457.288		458.089	336.198	592.716	0.87471	0.591152	0.771512		0.772863	0.567215		0.982011	0.591152	0.653534	0.442223	0.567215	0.772863		10.7874	3.31228	10.821		11.6689	3.27666	8.96939	1.20269	0.369287	1.20644		1.30097	0.365316		1.04341	0.369287	0.620583	0.348873	0.365316	1.30097
484.349	311.808	394.133		415.364	292.534	592.716	0.817169	0.526067	0.664961		0.70078	0.493549		0.838145	0.526067	1.24044	1.43613	0.493549	0.70078		11.6751	2.90205	5.56625		7.67994	5.15762	8.96939	1.30166	0.32355	0.620583		0.856239	0.575025		0.624553	0.32355	1.23034	0.811093	0.575025	0.856239
481.135	303.764	387.36		384.427	229.071	592.716	0.811746	0.512495	0.653534		0.648586	0.386476		1.12164	0.512495	1.03402	0.852025	0.386476	0.648586		8.50544	2.79919	11.0354		7.36365	5.59421	8.96939	0.948274	0.312082	1.23034		0.820976	0.6237		1.2874	0.312082	0.818757	0.700867	0.6237	0.820976
592.716				357.364		592.716					0.602926			1.0362	0.834627	1.10732	0.833245	1.13431	0.602926		8.96939	4.95779			3.89971		8.96939	1				0.43478			1.21403	0.924479	1.0859	0.62175	0.912734	0.43478
				332.993		592.716					0.561808			1.02573	0.684881	0.902282	0.784881	1.12623	0.561808						4.30277		8.96939					0.479717			1.06279	0.617302	0.491671	0.404107	0.752016	0.479717
				327.204		592.716					0.552041			0.967157	0.679015	0.794034	0.778786	1.02633	0.552041						4.20157		8.96939					0.468434			0.737654	0.577099	1.33997	0.388726	0.696054	0.468434
				299.416		592.716					0.505159			0.890099	0.639041	1.05741	0.739727	0.671216	0.505159						4.06084										0.643888	0.513947	0.761842	0.321336	0.593846	0.810335
														0.858586	0.618867	1.10776	0.684791	0.820338	0.574838						2.61866										0.87294	0.486661	0.768286	0.321336	0.520686	0.474454
														1.06755	0.56983	0.746179	0.681275	0.815959	0.730556																0.537334	0.392916	1.09497	0.17206	0.508237	0.453162
910.321	646.745		689.385			774.892	1.17477	0.834627		0.889653				1.0805	0.645672	1.07408	0.576183	0.918574	0.674427		16.5452	10.9021		10.7319			11.7927	1.403	0.924479		0.910044				0.865609	0.525541	0.5625	0.496144	0.417281	0.386726
900.117	530.709		579.056			774.892	1.1616	0.684881		0.747273				1.6071	0.627267	1.04506	0.544149	0.794713	0.561929		16.1304	7.27966		9.59433			11.7927	1.36783	0.617302		0.813582				1.11934	0.41925	0.729538	0.331465	0.320274	1.03445
836.704	526.163		515.505			774.892	1.07977	0.679015		0.665261				1.1042	0.757143	1.29728	0.455545	0.764831	0.817673		14.3801	6.80556		8.82072			11.7927	1.21941	0.577099		0.74798				1.09712	0.393638	0.419612	0.465899	0.820437	1.01095
821.531	495.188		505.324			774.892	1.06019	0.639041		0.652122				1.01509	0.603172	1.11803	0.450745	1.00519	0.783684		12.3347	6.06083		8.09969			11.7927	1.04596	0.513947		0.686839				1.00578	0.865612	1.33689	0.392899	0.38313	0.785016
760.952	479.555		476.282			774.892	0.982011	0.618867		0.614643				0.817047	0.956533	1.06433	0.550241	0.828219	0.727317		12.3046	5.73905		5.20791			11.7927	1.04341	0.486661		0.441621				0.951983	0.849452	1.26504	0.470471	0.710344	0.755554
717.185	441.556		465.277			774.892	0.925529	0.56983		0.600442				0.733523	0.830589	1.02957	0.579204	1.03398	0.673652		8.30512	4.63355		5.05237			11.7927	0.704259	0.392916		0.428431				0.816549	0.622599	1.15062	0.564777	0.278516	0.673998
649.472			429.574			774.892	0.838145			0.554366				1.12164	0.735185	0.93225	1.12329	0.742269	0.647194		7.36517			4.65927			11.7927	0.624553			0.395098				1.2874	0.541225	0.751364	0.361513	0.375313	0.571288
602.852			342.675			774.892	0.777982			0.442223				1.0362	0.650945	0.903712	0.815563	0.797294	0.639286		6.97638			4.11416			11.7927	0.591584			0.348873				1.21403	0.446479	0.649046	0.352225	0.632177	0.472835
774.892						774.892	1							1.02573	0.578506	0.797487	1.43613	0.827198	0.63381		11.7927						11.7927	1							1.05424	0.632856	0.580374	0.525713	0.403362	0.47077
														0.817965	0.765001	0.786095	0.852025	0.743293	0.599794								11.7927								0.643888	0.447458	0.438983	0.811093	0.413399	0.626052
476.215			609.737			424.569	1.12164			1.43613				1.18541	0.724302	1.17433	0.833245	0.727296	0.646404		8.84255			5.57102			6.86854	1.2874			0.811093				1.33517	0.451274	1.33274	0.700867	0.504385	0.544568
439.938			361.744			424.569	1.0362			0.852025				0.972951	0.789517	0.950135	0.784881	0.874713	0.710287		8.33862			4.81393			6.86854	1.21403			0.700867				1.12237	0.86101	0.903459	0.62175	0.939754	0.338295
437.862			353.77			424.569	1.03131			0.833245				1.07203	0.891824	0.810044	0.778786	1.19843	1.01361		7.29979			4.27051			6.86854	1.06279			0.62175				0.876044	0.663951	0.900274	0.404107	0.544436	0.463699
435.493			333.236			424.569	1.02573			0.784881				0.721139	0.652371	0.805955	0.739727	0.778411	0.770238		7.24109			2.77562			6.86854	1.05424			0.404107				0.784963	0.452012	0.678068	0.388726	0.691557	0.708865
410.625			330.648			424.569	0.967157			0.778786				0.927711	0.707439	0.79688	0.684791	0.701688	0.850659		5.0666			2.66998		1	6.86854	0.737654			0.388726				0.767306	0.870448	0.3568	0.321336	0.43969	0.337052
347.283			314.065			424.569	0.817965			0.739727				1.4128	0.893938		0.681275	0.798013	0.833901		4.42257			2.20711			6.86854	0.643888			0.321336				0.508541	0.806193		0.321336	0.514068	0.325808
424.569			290.741			424.569	1			0.684791				1.10255	0.830283			0.705636	0.862097		6.86854			2.20711			6.86854	1			0.321336				1.86526	0.593883			0.540803	0.633077
			289.248			424.569				0.681275				1.034	0.718804			0.814488	0.870527					1.1818			6.86854				0.17206				1.1581	0.445451			0.648297	0.416338
														0.963161	0.70718			0.775423	1.04668																1.12476	0.402009			0.242248
														0.911082	0.642088																				0.886832	0.345359
665.553	482.788		430.829	429.823		747.729	0.890099	0.645672		0.576183	0.574838			0.872035	0.589344						6.89698	4.15223		3.91997	6.40235		7.90087	0.87294	0.525541		0.496144	0.810335			0.747064	0.291861
641.99	469.026		185.37	546.258		747.729	0.858586	0.627267		0.247911	0.730556			0.809263	0.510928						4.24541	1.90361		2.61886	3.7486		7.90087	0.537334	0.240937		0.331465	0.474454			0.53346	0.76679
851.679	566.138		282.639	504.289		747.729	1.13902	0.757143		0.377996	0.674427			1.23638	0.913507						15.3285	3.31244		3.68101	3.58037		7.90087	1.94011	0.41925		0.465899	0.453162			1.33468	0.580241
798.238	451.01		263.783	420.171		747.729	1.06755	0.603172		0.352778	0.561929			1.18254	0.805352						6.83906	3.11008		3.10424	3.05547		7.90087	0.865609	0.393638		0.392899	0.386726			1.12932	0.356268
720.991			390.079			747.729	0.964241			0.521685				0.989064	0.704961						5.25145			3.71713			7.90087	0.664668			0.470471				1.03697	0.295701
807.924			406.876			747.729	1.0805			0.544149				0.905484	0.704098						8.84378			4.46223			7.90087	1.11934			0.564777				0.991627	0.285392
747.729			340.625			747.729	1			0.455545				0.905389							7.90087			2.85627			7.90087	1			0.361513				0.954994
			337.036			747.729				0.450745				0.831131										2.78288			7.90087				0.352225				0.55218
			411.431			747.729				0.550241														2.34647			7.90087				0.296989
			433.088			747.729				0.579204														4.15359			7.90087				0.525713
			839.919			747.729				1.12329																	7.90087
			609.82			747.729				0.815563																	7.90087
						747.729
959.717	571.216			488.293	677.378	597.174	1.6071	0.956533													10.3287	8.14925			9.73875	8.59287	9.41444	1.09712	0.865612			1.03445	0.912734
659.402	496.006			467.996	672.553	597.174	1.1042	0.830589													9.46888	7.99712			9.51757	7.0798	9.41444	1.00578	0.849452			1.01095	0.752016
608.529	461.019			434.335	612.896	597.174	1.01901	0.772001													9.15926	6.91681			7.39049	6.55296	9.41444	0.972895	0.734703			0.785016	0.696054
606.183	439.033			402.287	400.832	597.174	1.01509	0.735185													8.96239	5.86142			7.11312	5.59073	9.41444	0.951983	0.622599			0.755554	0.593846
540.503	406.124			386.487	489.884	597.174	0.905101	0.680076													8.72683	5.57755			6.34532	4.90197	9.41444	0.926962	0.592446			0.673998	0.520686
487.919	388.727			381.765	487.269	597.174	0.817047	0.650945													7.68735	5.09533			5.37835	4.78477	9.41444	0.816549	0.541225			0.571288	0.508237
477.096	347.438			378.495	548.548	597.174	0.798923	0.581803													6.64299	4.20335			4.45148	3.92847	9.41444	0.705618	0.446479			0.472835	0.417281
438.041	345.468			370.339	474.582	597.174	0.733523	0.578506													9.41444	6.78622			4.43203	3.0152	9.41444	1	0.720831			0.47077	0.320274
597.174					456.737	597.174	1																				9.41444
						597.174
																					8.84255			5.57102				1.2874			0.811093
476.215			609.737				1.12164			1.43613											8.33862			4.81393				1.21403			0.700867
439.938			361.744				1.0362			0.852025											7.29979			4.27051				1.06279			0.62175
437.862			353.77				1.03131			0.833245											7.24109			2.77562				1.05424			0.404107
435.493			333.236				1.02573			0.784881											5.0666			2.66998				0.737654			0.388726
410.625			330.648				0.967157			0.778786											4.42257			2.20711				0.643888			0.321336
347.283			314.065				0.817965			0.739727											6.86854			2.20711							0.321336
424.569			290.741							0.684791														1.1818							0.17206
			289.248							0.681275
559.717	361.214	585.704		283.207	474.622	472.174	1.18541	0.765001	1.24044		0.599794	1.00519									6.33906	3.00466	3.88727		2.97235	3.89525	4.74777	1.33517	0.632856	0.818757		0.626052	0.820437
459.402	341.997	488.239		305.215	391.063	472.174	0.972951	0.724302	1.03402		0.646404	0.828219									5.32875	1.28685	5.15558		2.58548	1.81901	4.74777	1.12237	0.271043	1.0859		0.544568	0.38313
508.529	300.396	522.849		335.379	488.216	472.174	1.07699	0.636198	1.10732		0.710287	1.03398									4.46888	2.12443	2.33434		1.60615	3.37255	4.74777	0.941259	0.447458	0.491671		0.338295	0.710344
506.183	325.952	640.775		478.6	350.48	472.174	1.07203	0.690321	1.35708		1.01361	0.742269									4.15926	2.14255	6.36187		2.20154	1.32233	4.74777	0.876044	0.451274	1.33997		0.463699	0.278516
340.503	372.789	426.034		363.686	376.461	472.174	0.721139	0.789517	0.902282		0.770238	0.797294									6.96239	3.05773	7.70342		3.36553	1.7819	4.74777	1.46645	0.644035	1.62253		0.708865	0.375313
487.919	350.046	374.922		401.659	390.581	472.174	1.03335	0.741351	0.794034		0.850659	0.827198									3.72683	4.08788	3.61705		1.60024	3.00143	4.74777	0.784963	0.86101	0.761842		0.337052	0.632177
477.096	421.096	499.282		393.746	350.963	472.174	1.01042	0.891824	1.05741		0.833901	0.743293									5.68735	3.15229	3.64765		1.54686	1.91507	4.74777	1.1979	0.663951	0.768286		0.325808	0.403362
438.041	322.427	523.057		407.06	343.41	472.174	0.927711	0.682857	1.10776		0.862097	0.727296									3.64299	2.54891	5.19865		3.0057	1.96272	4.74777	0.767306	0.536864	1.09497		0.633077	0.413399
472.174	308.033	505.241		411.04	413.016	472.174	1	0.652371	1.07003		0.870527	0.874713									2.41444	2.14605	2.67062		1.97668	2.3947	4.74777	0.508541	0.452012	0.5625		0.416338	0.504385
	334.034	352.326		494.214	565.866	472.174		0.707439	0.746179		1.04668	1.19843									4.74777	2.32841	1.70172			4.46174	4.74777	1	0.490421	0.358426			0.939754
		507.151			367.545	472.174			1.07408			0.778411											3.46368			2.58486	4.74777			0.729538			0.544436
		493.448			331.318	472.174			1.04506			0.701688											1.99222			3.28336	4.74777			0.419612			0.691557
					376.801	472.174						0.798013														2.08755	4.74777						0.43969
					333.183	472.174						0.705636														2.44068	4.74777						0.514068
					384.58	472.174						0.814488														2.56761	4.74777						0.540803
					366.134	472.174						0.775423														3.07797	4.74777						0.648297
																										1.15014	4.74777						0.242248
838.872	530.789	770.281				593.765	1.4128	0.893938	1.29728												17.6036	8.21495	15.8175				9.43761	1.86526	0.870448	1.67601
757.208	492.993	663.845				593.765	1.27527	0.830283	1.11803												11.5623	7.60853	15.5244				9.43761	1.22513	0.806193	1.64495
654.654	426.801	634.494				593.765	1.10255	0.718804	1.0686												10.9297	6.51103	15.207				9.43761	1.1581	0.689903	1.61132
613.951	424.421	631.962				593.765	1.034	0.714797	1.06433												10.6151	5.60483	12.6171				9.43761	1.12476	0.593883	1.33689
583.765	419.899	611.323				593.765	0.983158	0.70718	1.02957												9.50064	4.20399	11.9389				9.43761	1.00668	0.445451	1.26504
571.891	383.145	576.745				593.765	0.963161	0.645281	0.971335												8.36958	3.97906	10.8591				9.43761	0.886832	0.421618	1.15062
540.969	381.249	553.537				593.765	0.911082	0.642088	0.93225												7.18439	3.794	7.09108				9.43761	0.761251	0.402009	0.751364
530.818	349.932	536.592				593.765	0.893987	0.589344	0.903712												7.0505	3.25937	6.12544				9.43761	0.747064	0.345359	0.649046
517.784	311.405	473.519				593.765	0.872035	0.524458	0.797487												6.52575	2.85569	5.47734				9.43761	0.691462	0.302586	0.580374
480.512	303.371	466.755				593.765	0.809263	0.510928	0.786095												5.03459	2.75447	4.14295				9.43761	0.53346	0.291861	0.438983
440.99						593.765	0.742701														9.43761						9.43761
593.765																					9.43761
612.91	452.853	582.149				495.73	1.23638	0.913507	1.17433												9.51012	5.46369	9.49632				7.12541	1.33468	0.76679	1.33274
586.22	399.237	471.011				495.73	1.18254	0.805352	0.950135												8.04689	4.13445	7.43066				7.12541	1.12932	0.580241	1.04284
494.697	382.1	410.241				495.73	0.997917	0.770782	0.82755												7.71109	2.71906	6.43751				7.12541	1.0822	0.3816	0.903459
490.309	349.47	401.563				495.73	0.989064	0.704961	0.810044												7.38884	2.53855	6.41482				7.12541	1.03697	0.356268	0.900274
471.983	349.043	399.536				495.73	0.952097	0.704098	0.805955												7.06575	2.10699	4.83151				7.12541	0.991627	0.295701	0.678068
448.876	303.194	395.038				495.73	0.905484	0.611612	0.79688												6.80472	2.03354	2.54234				7.12541	0.954994	0.285392	0.3568
448.829						495.73	0.905389														6.54133						7.12541	0.91803
412.017						495.73	0.831131														3.93451						7.12541	0.55218
495.73																					7.12541
