# Supplementary material for: Endophilin A1 facilitates organization of the GABAergic postsynaptic machinery to maintain excitation-inhibition balance
Source: eLife. 2025 Oct 2;13:RP102792. doi: 10.7554/eLife.102792 (PMC12490859; doi:10.7554/eLife.102792)
Supplement: Figure 7—source data 3. [file elife-102792-fig7-data3.xlsx]

## Sheet: Figure 7F
mCherry + GFP_PTZ																							mCherry + GFP_saline
	1st								2nd							3rd								1st								2nd							3rd
	M1	M2	M3	M4	M5	M6	M7		M1	M2	M3	M4	M5			M1	M2	M3	M4					M1	M2	M3	M4	M5	M6	M7		M1	M2	M3	M4	M5			M1	M2	M3	M4
Day1	1	1	1	1	1	1	1		1	1	1	1	1			1	1	1	1				Day1	0	0	0	0	0	0	0		0	0	0	0	0			0	0	0	0
Day2	1	1	1	1	1	1	1		1	1	1	1	1			1	1	1	1				Day2	0	0	0	0	0	0	0		0	0	0	0	0			0	0	0	0
Day3	1	1	1	1	1	1	1		1	1	1	1	1			1	2	1	1				Day3	0	0	0	0	0	0	0		0	0	0	0	0			0	0	0	0
Day4	1	2	2	1	1	1	1		2.5	2	1	2	2			1.5	1.5	1.5	1.5				Day4	0	0	0	0	0	0	0		0	0	0	0	0			0	0	0	0
Day5	2.5	1.5	4	1	1	2	1		3	2	1	4	2			1.5	1.5	1.5	1.5				Day5	0	0	0	0	0	0	0		0	0	0	0	0			0	0	0	0
Day6	1.5	1	4	1	1	2.5	2		3	3	1	2.5	1.5			1.5	1.5	1.5	1.5				Day6	0	0	0	0	0	0	0		0	0	0	0	0			0	0	0	0
Day7	2.5	1.5	4	1	1.5	1.5	2		2	7	1	1.5	4			1.5	1.5	1.5	1.5				Day7	0	0	0	0	0	0	0		0	0	0	0	0			0	0	0	0
Day8	2	2.5	7	1	1.5	6	2		3	7	1	1.5	3			1.5	2	1.5	1.5				Day8	0	0	0	0	0	0	0		0	0	0	0	0			0	0	0	0
Day9	4	3	7	1.5	1.5	4.5	2		2	7	1	4	1.5			1.5	1.5	1.5	2.5				Day9	0	0	0	0	0	0	0		0	0	0	0	0			0	0	0	0
Day10	2.5	4	7	2	4	4.5	3		2	7	1.5	4	2			1.5	2	1.5	4				Day10	0	0	0	0	0	0	0		0	0	0	0	0			0	0	0	0
Day11	7	6	7	1.5	2	2	3		2	7	1.5	3.5	1.5			1.5	2	1.5	4				Day11	0	0	0	0	0	0	0		0	0	0	0	0			0	0	0	0
Day12	7	7	7	1.5	6	3	3		2	7	1.5	3	2			1.5	2.5	1.5	5				Day12	0	0	0	0	0	0	0		0	0	0	0	0			0	0	0	0
Cre + GFP_PTZ																							Cre + GFP_saline
	M1	M2	M3	M4	M5	M6	M7		M1	M2	M3	M4	M5	M6		M1	M2	M3	M4					M1	M2	M3	M4	M5	M6	M7		M1	M2	M3	M4	M5	M6		M1	M2	M3	M4
Day1	1	1	1	3.5	1	2	5.5		3.5	1.5	2	4.5	1	1		1	1	2	1				Day1	0	0	0	0	0	0	0		0	0	0	0	0	0		0	0	0	0
Day2	2	2.5	3	3	1	4	5.5		3.5	1.5	2	3	1	5		1	1	4	1				Day2	0	0	0	0	0	0	0		0	0	0	0	0	0		0	0	0	0
Day3	1.5	3	3	4	4	2	4.5		3	1.5	5	3	1	3		1	4	4.5	4.5				Day3	0	0	0	0	0	0	0		0	0	0	0	0	0		0	0	0	0
Day4	2	4	3.5	3.5	2.5	3	4		7	4.5	7	4.5	1	4.5		1.5	1.5	4.5	4.5				Day4	0	0	0	0	0	0	0		0	0	0	0	0	0		0	0	0	0
Day5	3	2.5	3.5	4.5	4.5	4	4.5		7	4.5	7	3	4	4.5		1.5	1.5	4.5	4.5				Day5	0	0	0	0	0	0	0		0	0	0	0	0	0		0	0	0	0
Day6	4	5	4	6	3.5	2	3		7	6	7	3	3.5	5		1.5	1.5	4.5	4.5				Day6	0	0	0	0	0	0	0		0	0	0	0	0	0		0	0	0	0
Day7	4.5	5	4.5	3.5	4.5	3.5	6.5		7	5	7	3	4.5	6.5		1.5	1.5	4.5	7				Day7	0	0	0	0	0	0	0		0	0	0	0	0	0		0	0	0	0
Day8	3.5	4.5	6	6	3.5	6	6.5		7	5.5	7	3.5	4.5	6.5		1.5	2	4.5	7				Day8	0	0	0	0	0	0	0		0	0	0	0	0	0		0	0	0	0
Day9	4.5	5.5	4.5	3.5	5.5	6	7		7	5	7	4	6	5		1.5	2.5	7	7				Day9	0	0	0	0	0	0	0		0	0	0	0	0	0		0	0	0	0
Day10	4.5	5.5	4.5	4.5	4	5	7		7	6	7	4.5	6	5		1.5	4	7	7				Day10	0	0	0	0	0	0	0		0	0	0	0	0	0		0	0	0	0
Day11	6.5	4.5	6	4	3	4.5	7		7	6	7	4.5	6	4		1.5	4.5	7	7				Day11	0	0	0	0	0	0	0		0	0	0	0	0	0		0	0	0	0
Day12	6.5	6	5.5	6.5	3.5	7	7		7	5	7	2.5	6.5	2.5		1.5	4.5	7	7				Day12	0	0	0	0	0	0	0		0	0	0	0	0	0		0	0	0	0
Cre + WT_PTZ																							Cre + WT_saline
	M1	M2	M3	M4	M5	M6	M7		M1	M2	M3	M4				M1	M2	M3	M4					M1	M2	M3	M4	M5	M6	M7		M1	M2	M3	M4				M1	M2	M3	M4
Day1	1	1	1	1	1	1	1		1	1	1	1				1	1	1	1				Day1	0	0	0	0	0	0	0		0	0	0	0				0	0	0	0
Day2	1	1	1	1	1	1.5	1		1	1	1	1				1	1	1	1.5				Day2	0	0	0	0	0	0	0		0	0	0	0				0	0	0	0
Day3	1	1	1	1	1	1.5	1		1	1	1	1				1	1	1	1.5				Day3	0	0	0	0	0	0	0		0	0	0	0				0	0	0	0
Day4	2.5	1	1	1	1	1.5	1.5		1	1	1.5	3				1	1	1	1.5				Day4	0	0	0	0	0	0	0		0	0	0	0				0	0	0	0
Day5	1.5	1	1	1	1	1.5	1.5		3	1	1.5	4				1	1	1	1.5				Day5	0	0	0	0	0	0	0		0	0	0	0				0	0	0	0
Day6	2	1	4	1	1	1.5	2		3	1	1.5	3				1	1	1	1.5				Day6	0	0	0	0	0	0	0		0	0	0	0				0	0	0	0
Day7	4	4	3	2.5	1.5	1.5	2		2	1.5	1.5	3				4	2.5	1.5	1.5				Day7	0	0	0	0	0	0	0		0	0	0	0				0	0	0	0
Day8	2	2.5	4	1.5	2	2.5	2		2	1.5	1.5	3				2.5	1.5	2	2.5				Day8	0	0	0	0	0	0	0		0	0	0	0				0	0	0	0
Day9	4	3	4	1.5	1.5	3	2		2.5	1.5	1.5	3				3	1.5	1.5	3				Day9	0	0	0	0	0	0	0		0	0	0	0				0	0	0	0
Day10	2.5	3.5	4	1.5	1.5	2.5	2		3	2	2	3				3.5	1.5	1.5	2.5				Day10	0	0	0	0	0	0	0		0	0	0	0				0	0	0	0
Day11	7	2	5	1.5	1.5	2	2		2	1.5	1.5	2				2	1.5	1.5	2				Day11	0	0	0	0	0	0	0		0	0	0	0				0	0	0	0
Day12	7	4	5	2	1.5	2.5	1.5		2	1.5	2.5	3				4	2	1.5	2.5				Day12	0	0	0	0	0	0	0		0	0	0	0				0	0	0	0
Cre + Y343A_PTZ																							Cre + Y343A_saline
	M1	M2	M3	M4	M5											M1	M2	M3						M1	M2	M3	M4	M5											M1	M2	M3
Day1	4	1	1	1	2											1	2	1					Day1	0	0	0	0	0											0	0	0
Day2	2	2	1	1	1.5											1	2	4					Day2	0	0	0	0	0											0	0	0
Day3	4	4	1	1	4											2	3	2.5					Day3	0	0	0	0	0											0	0	0
Day4	5	4	1	1	3											3	3	1.5					Day4	0	0	0	0	0											0	0	0
Day5	4.5	4	1	1	4											3	3	2					Day5	0	0	0	0	0											0	0	0
Day6	5	4.5	1.5	2	4											3	4	2.5					Day6	0	0	0	0	0											0	0	0
Day7	5	5	2	2	7											4	4.5	3					Day7	0	0	0	0	0											0	0	0
Day8	4.5	4.5	2	1.5	7											4	4	2					Day8	0	0	0	0	0											0	0	0
Day9	4.5	4.5	4	2	7											4	4.5	6					Day9	0	0	0	0	0											0	0	0
Day10	6	4.5	4	1.5	7											5	5	7					Day10	0	0	0	0	0											0	0	0
Day11	3.5	3	5	2	7											4.5	4.5	7					Day11	0	0	0	0	0											0	0	0
Day12	3.5	3	7	4	7											5	5	7					Day12	0	0	0	0	0											0	0	0
Cre + KKK-EEE_PTZ																							Cre + KKK-EEE_saline
									M1	M2	M3	M4	M5	M6																		M1	M2	M3	M4	M5	M6
Day1									1	1	1	1	1	1									Day1									0	0	0	0	0	0
Day2									1	1	1	1	1	1									Day2									0	0	0	0	0	0
Day3									1.5	2.5	1	1	1	1.5									Day3									0	0	0	0	0	0
Day4									3.5	4.5	4.5	1	2	1.5									Day4									0	0	0	0	0	0
Day5									5	7	7	1	2.5	1									Day5									0	0	0	0	0	0
Day6									5.5	7	7	1	2	1									Day6									0	0	0	0	0	0
Day7									5	7	7	2	2	3									Day7									0	0	0	0	0	0
Day8									7	7	7	2.5	2	3									Day8									0	0	0	0	0	0
Day9									7	7	7	3.5	3	3									Day9									0	0	0	0	0	0
Day10									7	7	7	5	4	3.5									Day10									0	0	0	0	0	0
Day11									7	7	7	4.5	4	2.5									Day11									0	0	0	0	0	0
Day12									7	7	7	6.5	3	3									Day12									0	0	0	0	0	0

## Sheet: Figure 7G
eEPSC			eEPSC			eEPSC			eEPSC			eEPSC
Control	mCherry+GFP		Control	Cre+GFP		Control	Cre+GFP-WT		Control	Cre+Y343A		Control	Cre+KKK-EEE
-174.434	-119.612		-139.539	-175.576		-196.148	-96.147		-144.218	-143.423		-166.378	-125.953
-153.149	-201.359		-97.4137	-120.636		-212.356	-192.092		-94.048	-295.186		-99.3271	-168.507
-129.182	-256.792		-163.153	-43.3027		-186.901	-175.576		-155.969	-121.227		-90.7579	-120.138
-134.185	-141.559		-77.8511	-39.1097		-95.4266	-164.72		-101.035	-86.8159		-111.191	-135.238
-115.951	-289.357		-65.1285	-184.728		-205.213	-62.8229		-218.678	-179.937		-78.7818	-80.8586
-108.368	-164.6		-90.2773	-99.1237		-167.925	-105.067		-176.18	-166.417		-173.384	-104.512
-99.637	-127.845		-131.808	-129.882		-250.288	-100.221		-115.045	-162.315		-169.7	-77.2765
-281.632			-102.153	-97.0118		-109.974			-78.8899	-85.6884		-246.6	-226.634
			-104.121	-92.0443					-123.751	-119.861		-78.7	-77.5
			-170.129							-89.7079		-161.1	-244.331

## Sheet: Figure 7H
eEPSC PPR			eEPSC PPR			eEPSC PPR			eEPSC PPR			eEPSC PPR
Control	mCherry+GFP		Control	Cre+GFP		Control	Cre+GFP-WT		Control	Cre+Y343A		Control	Cre+KKK-EEE
1.45609	0.803056		1.10307	1.60819		1.34972	1.44398		1.33048	1.53945		1.47387	0.977995
1.0427	0.454939		0.627778	0.490909		1.4522	1.62978		0.742173	1.05968		1.94146	1.13539
0.936911	1.10808		1.10103	0.725639		0.849304	1.21726		1.3425	0.734273		1.20301	1.45734
0.366579	1.12833		1.25096	1.18944		1.04067	1.52586		1.09923	1.21713		1.40658	1.09424
0.77874	1.39514		0.819892	0.636664		1.81424	1.41034		0.967938	0.96875		1.02104	1.63277
1.19315	1.36308		0.2954	0.448211		1.52818	0.964387		0.409065	0.769119		1.51455	0.866544
0.590909	0.931269		1.61676	1.5678		1	1.19172		0.846452	1.38082		1.74556	1.26677
1.16431			1.66286	1.75423		1.27173			1.3142	1.32253		1.63214	1.05391
			1.02416	0.795987					1.83162	1.21396		1.39537	1.03478
			3.49905							1.3352		0.827098	0.905085

## Sheet: Figure 7I
eIPSC			eIPSC			eIPSC			eIPSC			eIPSC
Control	mCherry+GFP		Control	Cre+GFP		Control	Cre+GFP-WT		Control	Cre+Y343A		Control	Cre+KKK-EEE
1865.43	1088.75		1295.2	703.281		951.59	769.306		622.632	538.694		804.59	456.156
425.457	732.889		375.412	308.745		646.711	580.372		608.992	460.694		532.033	399.094
821.557	417.843		1018.67	227.138		973.307	515.075		632.854	424.183		510.766	355.668
904.669	365.073		976.338	467.415		617.965	531.594		988.193	422.791		880.323	435.426
653.128	707.705		920.247	790.244		661.093	1076.74		984.609	877.332		507.757	438.096
354.071	815.456		621.933	309.936		679.832	569.959		858.393	481.096		985.581	554.361
443.078	1175.65		522.369	332.68		1120.78	928.388		560.135	344.864		1098	414.343
963.707			1003.54	390.279		539.663			454.184	303.63		894.8	560.28
			434.792	296.444					515.887	464.549		548.1	573.1
			869.051							387.274		769.7	616.5

## Sheet: Figure 7J
eIPSC PPR			eIPSC PPR			eIPSC PPR			eIPSC PPR			eIPSC PPR
Control	mCherry+GFP		Control	Cre+GFP		Control	Cre+GFP-WT		Control	Cre+Y343A		Control	Cre+KKK-EEE
0.596414	0.621189		0.702356	0.674511		0.756309	0.64933		0.689351	0.599862		0.597239	0.739952
0.660815	0.492558		0.59348	0.605847		0.697007	0.620917		0.555228	0.622617		0.680157	0.715175
0.403371	0.645093		0.658589	0.700512		0.595554	0.647085		0.581551	0.808671		0.679555	0.627002
0.147412	0.466594		0.668866	0.695789		0.637867	0.577887		0.734482	0.788914		0.724365	0.718622
0.601219	0.650575		0.534766	0.944879		0.610941	0.614688		0.632075	0.801906		0.782564	0.686448
0.608827	0.475459		0.734596	0.501109		0.571887	0.568569		0.597977	0.680678		0.544884	0.606117
0.6586	0.529737		0.553973	0.689105		0.679942	0.604289		0.748265	0.68		0.6326	0.518747
0.488906			0.67755	2.34353		0.710942			0.688902	0.676794		0.392866	0.62482
			0.623771	0.524506					0.697483	0.639095		0.507635	1.01471
			1.0665							0.687112		0.652191	0.455247

## Sheet: Figure 7K
Control				mCherry+GFP
eEPSC	eIPSC	E-I ratio		eEPSC	eIPSC	E-I ratio
-174.434	1865.43	0.0935084		-119.612	1088.75	0.109862
-153.149	425.457	0.359963		-201.359	732.889	0.274747
-129.182	821.557	0.15724		-256.792	417.843	0.614565
-134.185	904.669	0.148325		-141.559	365.073	0.387754
-115.951	653.128	0.177533		-289.357	707.705	0.408866
-108.368	354.071	0.306063		-164.6	815.456	0.20185
-99.637	443.078	0.224875		-127.845	1175.65	0.108745
-281.632	963.707	0.292238
Control				Cre+GFP
eEPSC	eIPSC	E-I ratio		eEPSC	eIPSC	E-I ratio
-139.539	1295.2	0.107735		-175.576	703.281	0.249653
-97.4137	375.412	0.259485		-120.636	308.745	0.39073
-163.153	1018.67	0.160162		-43.3027	227.138	0.190645
-77.8511	976.338	0.0797379		-39.1097	467.415	0.0836721
-65.1285	920.247	0.0707728		-184.728	790.244	0.23376
-90.2773	621.933	0.145156		-99.1237	309.936	0.31982
-131.808	522.369	0.252328		-129.882	332.68	0.39041
-102.153	1003.54	0.101793		-97.0118	390.279	0.24857
-104.121	434.792	0.239473		-92.0443	296.444	0.310495
-170.129	869.051	0.195764
Control				Cre+GFP-WT
eEPSC	eIPSC	E-I ratio		eEPSC	eIPSC	E-I ratio
-196.148	951.59	0.206126		-96.147	769.306	0.124979
-212.356	646.711	0.328364		-192.092	580.372	0.33098
-186.901	973.307	0.192027		-175.576	515.075	0.340874
-95.4266	617.965	0.154421		-164.72	531.594	0.309861
-205.213	661.093	0.310415		-62.8229	1076.74	0.0583456
-167.925	679.832	0.24701		-105.067	569.959	0.184342
-250.288	1120.78	0.223316		-100.221	928.388	0.107952
-109.974	539.663	0.203783
Control				Cre+Y343A
eEPSC	eIPSC	E-I ratio		eEPSC	eIPSC	E-I ratio
-144.218	622.632	0.231626		-143.423	538.694	0.266243
-94.048	608.992	0.154432		-295.186	460.694	0.640742
-155.969	632.854	0.246453		-121.227	424.183	0.285789
-101.035	988.193	0.102242		-86.8159	422.791	0.20534
-218.678	984.609	0.222096		-179.937	877.332	0.205096
-176.18	858.393	0.205244		-166.417	481.096	0.345912
-115.045	560.135	0.205389		-162.315	344.864	0.470662
-78.8899	454.184	0.173696		-85.6884	303.63	0.282214
-123.751	515.887	0.239881		-119.861	464.549	0.258016
				-89.7079	387.274	0.231639
Control				Cre+KKK-EEE
eEPSC	eIPSC	E-I ratio		eEPSC	eIPSC	E-I ratio
-166.378	804.59	0.206786		-125.953	456.156	0.276118
-99.3271	532.033	0.186693		-168.507	399.094	0.422224
-90.7579	510.766	0.17769		-120.138	355.668	0.33778
-111.191	880.323	0.126307		-135.238	435.426	0.310588
-78.7818	507.757	0.155157		-80.8586	438.096	0.184568
-173.384	985.581	0.175921		-104.512	554.361	0.188526
-169.7	1098	0.154554		-77.2765	414.343	0.186504
-246.6	894.8	0.275592		-226.634	560.28	0.404501
-78.7	548.1	0.143587		-77.5	573.1	0.135229
-161.1	769.7	0.209302		-244.331	616.5	0.39632
