# Supplementary material for: Endophilin A1 facilitates organization of the GABAergic postsynaptic machinery to maintain excitation-inhibition balance
Source: eLife. 2025 Oct 2;13:RP102792. doi: 10.7554/eLife.102792 (PMC12490859; doi:10.7554/eLife.102792)
Supplement: Supplementary file 1. — Related to Figure 4. [file elife-102792-supp1.xlsx]

## Sheet: GO enrichment
#Term	Database	ID	Input number	Background number	P-Value	Corrected P-Value	Input
Synaptic vesicle cycle	KEGG PATHWAY	mmu04721	16	77	1.29632e-16	8.42609e-15	Snap25|Slc6a1|Stx1b|Atp6v1a|Atp6v1d|Syt1|Atp6v1e1|Atp6v1h|Nsf|Stxbp1|Dnm1|Atp6v0a1|Ap2a1|Atp6v1b2|Atp6v0d1|Atp6v1g2
Glutamatergic synapse	KEGG PATHWAY	mmu04724	17	114	1.95891e-15	1.11738e-13	Dlg4|Gnao1|Prkcb|Gnb1|Adcy9|Prkcg|Gnb2|Grin2b|Glul|Dlgap1|Homer1|Ppp3ca|Ppp3cb|Shank3|Shank2|Shank1|Gnai1
Dopaminergic synapse	KEGG PATHWAY	mmu04728	16	135	3.33222e-13	1.36964e-11	Ppp2r1a|Prkcb|Ppp1cb|Ppp1cc|Ppp1ca|Gnao1|Camk2g|Gnb1|Camk2a|Prkcg|Gnb2|Grin2b|Camk2b|Ppp3ca|Ppp3cb|Gnai1
Regulation of actin cytoskeleton	KEGG PATHWAY	mmu04810	18	217	2.94373e-12	1.12709e-10	Myh10|Arpc4|Actn1|Myh9|Ppp1cb|Actg1|Actn4|Arpc3|Arpc1a|Arpc5l|Ppp1ca|Ppp1cc|Ppp1r12a|Cfl1|Baiap2|Actb|Gsn|Myl9
cAMP signaling pathway	KEGG PATHWAY	mmu04024	17	213	2.1048e-11	7.00347e-10	Rapgef4|Atp1a2|Ppp1cb|Ppp1cc|Ppp1ca|Camk2a|Camk2g|Atp1b2|Adcy9|Camk2b|Atp1b1|Grin2b|Atp1a3|Ppp1r12a|Atp1a1|Gnai1|Myl9
Long-term potentiation	KEGG PATHWAY	mmu04720	11	67	7.47983e-11	2.3229e-09	Camk2g|Ppp1cb|Ppp1cc|Ppp1ca|Prkcb|Camk2a|Prkcg|Grin2b|Camk2b|Ppp3ca|Ppp3cb
GABAergic synapse	KEGG PATHWAY	mmu04727	12	90	9.03455e-11	2.74474e-09	Slc6a1|Gnao1|Prkcb|Gnb1|Adcy9|Nsf|Gnb2|Glul|Prkcg|Gnai1|Gabra1|Gphn
Endocytosis	KEGG PATHWAY	mmu04144	16	270	4.78706e-09	9.5185e-08	Capza2|Capza1|Arpc5l|Capzb|Arpc3|Arpc1a|Hspa8|Arpc4|Dnm1|Iqsec1|Ap2a1|Iqsec2|Sh3gl1|Sh3kbp1|Sh3gl3|Sh3gl2
Calcium signaling pathway	KEGG PATHWAY	mmu04020	12	194	2.65423e-07	3.9045e-06	Nos1|Prkcb|Camk2g|Adcy9|Prkcg|Camk2a|Camk2b|Ppp3ca|Vdac3|Vdac2|Vdac1|Ppp3cb
Long-term depression	KEGG PATHWAY	mmu04730	6	61	2.47698e-05	0.000211072	Nos1|Ppp2r1a|Gnao1|Prkcb|Prkcg|Gnai1

## Sheet: Protein intensity of MS
Gene names	Protein names	Intensity_anti-EEN1	Intensity_IgG	KEGG PATHWAY
Ap2a1	AP-2 complex subunit alpha-1	6293800	72590	Synaptic vesicle cycle
Atp6v0a1	V-type proton ATPase subunit a;V-type proton ATPase 116 kDa subunit a isoform 1	12553000	420620	Synaptic vesicle cycle
Atp6v0d1	V-type proton ATPase subunit d 1	9807900	306310	Synaptic vesicle cycle
Atp6v1a	V-type proton ATPase catalytic subunit A	12674000	831070	Synaptic vesicle cycle
Atp6v1b2	V-type proton ATPase subunit B, brain isoform	356400	0	Synaptic vesicle cycle
Atp6v1d	V-type proton ATPase subunit D	448400	181480	Synaptic vesicle cycle
Atp6v1e1	V-type proton ATPase subunit E 1	2054600	99020	Synaptic vesicle cycle
Atp6v1g2	V-type proton ATPase subunit G 2	7074800	424200	Synaptic vesicle cycle
Atp6v1h	V-type proton ATPase subunit H	352440	0	Synaptic vesicle cycle
Dnm1	Dynamin-1	82289000	443410	Synaptic vesicle cycle
Nsf	Vesicle-fusing ATPase	12858000	1829900	Synaptic vesicle cycle
Slc6a1	Transporter;Sodium- and chloride-dependent GABA transporter 1	653800	0	Synaptic vesicle cycle
Snap25	Synaptosomal-associated protein 25	4492000	717480	Synaptic vesicle cycle
Stx1b	Syntaxin-1B	729710	279820	Synaptic vesicle cycle
Stxbp1	Syntaxin-binding protein 1	5774700	1603000	Synaptic vesicle cycle
Syt1	Synaptotagmin-1	1839500	291650	Synaptic vesicle cycle
Adcy9	Adenylate cyclase type 9	506610	227890	Glutamatergic synapse
Dlg4	Disks large homolog 4	37689000	57855	Glutamatergic synapse
Dlgap1	Disks large-associated protein 1	3350400	0	Glutamatergic synapse
Glul	Glutamine synthetase	9864100	1464400	Glutamatergic synapse
Gnao1	Guanine nucleotide-binding protein G(o) subunit alpha	21602000	1151800	Glutamatergic synapse
Gnb1	Guanine nucleotide-binding protein G(I)/G(S)/G(T) subunit beta-1	9447400	544480	Glutamatergic synapse
Gnb2	Guanine nucleotide-binding protein G(I)/G(S)/G(T) subunit beta-2	1199000	159280	Glutamatergic synapse
Grin2b	Glutamate receptor ionotropic, NMDA 2B	8013400	0	Glutamatergic synapse
Homer1	Homer protein homolog 1	8677300	131030	Glutamatergic synapse
Ppp3ca	Serine/threonine-protein phosphatase;Serine/threonine-protein phosphatase 2B catalytic subunit alpha isoform	7812500	775320	Glutamatergic synapse
Prkcb	Protein kinase C beta type	1005000	0	Glutamatergic synapse
Prkcg	Protein kinase C;Protein kinase C gamma type	7313100	243370	Glutamatergic synapse
Shank1	SH3 and multiple ankyrin repeat domains protein 1	12910000	16204	Glutamatergic synapse
Shank2	SH3 and multiple ankyrin repeat domains protein 2	5168000	26655	Glutamatergic synapse
Shank3	SH3 and multiple ankyrin repeat domains protein 3	21108000	0	Glutamatergic synapse
Camk2a	Calcium/calmodulin-dependent protein kinase type II subunit alpha	237830000	5327400	Dopaminergic synapse
Camk2b	Calcium/calmodulin-dependent protein kinase type II subunit beta	61916000	331940	Dopaminergic synapse
Camk2g	Calcium/calmodulin-dependent protein kinase type II subunit gamma	2428400	0	Dopaminergic synapse
Gnai1	Guanine nucleotide-binding protein G(i) subunit alpha-1	587000	123040	Dopaminergic synapse
Gnao1	Guanine nucleotide-binding protein G(o) subunit alpha	21602000	1151800	Dopaminergic synapse
Gnb1	Guanine nucleotide-binding protein G(I)/G(S)/G(T) subunit beta-1	9447400	544480	Dopaminergic synapse
Gnb2	Guanine nucleotide-binding protein G(I)/G(S)/G(T) subunit beta-2	1199000	159280	Dopaminergic synapse
Grin2b	Glutamate receptor ionotropic, NMDA 2B	8013400	0	Dopaminergic synapse
Ppp1ca	Serine/threonine-protein phosphatase PP1-alpha catalytic subunit;Serine/threonine-protein phosphatase	17607000	0	Dopaminergic synapse
Ppp1cb	Serine/threonine-protein phosphatase PP1-beta catalytic subunit	1388700	0	Dopaminergic synapse
Ppp1cc	Serine/threonine-protein phosphatase;Serine/threonine-protein phosphatase PP1-gamma catalytic subunit	11833000	0	Dopaminergic synapse
Ppp2r1a	Serine/threonine-protein phosphatase 2A 65 kDa regulatory subunit A alpha isoform	2331900	121250	Dopaminergic synapse
Ppp3ca	Serine/threonine-protein phosphatase;Serine/threonine-protein phosphatase 2B catalytic subunit alpha isoform	7812500	775320	Dopaminergic synapse
Ppp3cb	Serine/threonine-protein phosphatase;Serine/threonine-protein phosphatase 2B catalytic subunit beta isoform	794030	61253	Dopaminergic synapse
Prkcb	Protein kinase C beta type	1005000	0	Dopaminergic synapse
Prkcg	Protein kinase C;Protein kinase C gamma type	7313100	243370	Dopaminergic synapse
Actb	Actin, cytoplasmic 1;Actin, cytoplasmic 1, N-terminally processed	7097000	167470	Regulation of actin cytoskeleton
Actg1	Actin, cytoplasmic 2;Actin, cytoplasmic 2, N-terminally processed	355970000	0	Regulation of actin cytoskeleton
Actn1	Alpha-actinin-1	82923000	195100	Regulation of actin cytoskeleton
Actn4	Alpha-actinin-4	983550	0	Regulation of actin cytoskeleton
Arpc1a	Actin-related protein 2/3 complex subunit 1A	1633800	0	Regulation of actin cytoskeleton
Arpc3	Actin-related protein 2/3 complex subunit 3	11045000	397930	Regulation of actin cytoskeleton
Arpc4	Actin-related protein 2/3 complex subunit 4	18086000	357870	Regulation of actin cytoskeleton
Arpc5l	Actin-related protein 2/3 complex subunit 5-like protein	4201100	119510	Regulation of actin cytoskeleton
Baiap2	Brain-specific angiogenesis inhibitor 1-associated protein 2	2024300	0	Regulation of actin cytoskeleton
Cfl1	Cofilin-1	2710300	508890	Regulation of actin cytoskeleton
Gsn	Gelsolin	23574000	198310	Regulation of actin cytoskeleton
Myh10	Myosin-10	860790000	2666800	Regulation of actin cytoskeleton
Myh9	Myosin-9	109220000	66824	Regulation of actin cytoskeleton
Myl9	Myosin regulatory light polypeptide 9	1257700	0	Regulation of actin cytoskeleton
Ppp1ca	Serine/threonine-protein phosphatase PP1-alpha catalytic subunit;Serine/threonine-protein phosphatase	17607000	0	Regulation of actin cytoskeleton
Ppp1cb	Serine/threonine-protein phosphatase PP1-beta catalytic subunit	1388700	0	Regulation of actin cytoskeleton
Ppp1cc	Serine/threonine-protein phosphatase;Serine/threonine-protein phosphatase PP1-gamma catalytic subunit	11833000	0	Regulation of actin cytoskeleton
Ppp1r12a	Protein phosphatase 1 regulatory subunit 12A	2048500	0	Regulation of actin cytoskeleton
Adcy9	Adenylate cyclase type 9	506610	227890	cAMP signaling pathway
Atp1a1	Sodium/potassium-transporting ATPase subunit alpha-1	1800900	700960	cAMP signaling pathway
Atp1a2	Sodium/potassium-transporting ATPase subunit alpha-2	2609400	928430	cAMP signaling pathway
Atp1a3	Sodium/potassium-transporting ATPase subunit alpha-3	33125000	6977100	cAMP signaling pathway
Atp1b1	Sodium/potassium-transporting ATPase subunit beta-1	7795900	2072600	cAMP signaling pathway
Atp1b2	Sodium/potassium-transporting ATPase subunit beta-2	555080	0	cAMP signaling pathway
Camk2a	Calcium/calmodulin-dependent protein kinase type II subunit alpha	237830000	5327400	cAMP signaling pathway
Camk2b	Calcium/calmodulin-dependent protein kinase type II subunit beta	61916000	331940	cAMP signaling pathway
Camk2g	Calcium/calmodulin-dependent protein kinase type II subunit gamma	2428400	0	cAMP signaling pathway
Gnai1	Guanine nucleotide-binding protein G(i) subunit alpha-1	587000	123040	cAMP signaling pathway
Grin2b	Glutamate receptor ionotropic, NMDA 2B	8013400	0	cAMP signaling pathway
Myl9	Myosin regulatory light polypeptide 9	1257700	0	cAMP signaling pathway
Ppp1ca	Serine/threonine-protein phosphatase PP1-alpha catalytic subunit;Serine/threonine-protein phosphatase	17607000	0	cAMP signaling pathway
Ppp1cb	Serine/threonine-protein phosphatase PP1-beta catalytic subunit	1388700	0	cAMP signaling pathway
Ppp1cc	Serine/threonine-protein phosphatase;Serine/threonine-protein phosphatase PP1-gamma catalytic subunit	11833000	0	cAMP signaling pathway
Ppp1r12a	Protein phosphatase 1 regulatory subunit 12A	2048500	0	cAMP signaling pathway
Rapgef4	Rap guanine nucleotide exchange factor 4	389920	0	cAMP signaling pathway
Camk2a	Calcium/calmodulin-dependent protein kinase type II subunit alpha	237830000	5327400	Long-term potentiation
Camk2b	Calcium/calmodulin-dependent protein kinase type II subunit beta	61916000	331940	Long-term potentiation
Camk2g	Calcium/calmodulin-dependent protein kinase type II subunit gamma	2428400	0	Long-term potentiation
Grin2b	Glutamate receptor ionotropic, NMDA 2B	8013400	0	Long-term potentiation
Ppp1ca	Serine/threonine-protein phosphatase PP1-alpha catalytic subunit;Serine/threonine-protein phosphatase	17607000	0	Long-term potentiation
Ppp1cb	Serine/threonine-protein phosphatase PP1-beta catalytic subunit	1388700	0	Long-term potentiation
Ppp1cc	Serine/threonine-protein phosphatase;Serine/threonine-protein phosphatase PP1-gamma catalytic subunit	11833000	0	Long-term potentiation
Ppp3ca	Serine/threonine-protein phosphatase;Serine/threonine-protein phosphatase 2B catalytic subunit alpha isoform	7812500	775320	Long-term potentiation
Ppp3cb	Serine/threonine-protein phosphatase;Serine/threonine-protein phosphatase 2B catalytic subunit beta isoform	794030	61253	Long-term potentiation
Prkcb	Protein kinase C beta type	1005000	0	Long-term potentiation
Prkcg	Protein kinase C;Protein kinase C gamma type	7313100	243370	Long-term potentiation
Adcy9	Adenylate cyclase type 9	506610	227890	GABAergic synapse
Gabra1	Gamma-aminobutyric acid receptor subunit alpha-1	292870	0	GABAergic synapse
Glul	Glutamine synthetase	9864100	1464400	GABAergic synapse
Gnai1	Guanine nucleotide-binding protein G(i) subunit alpha-1	587000	123040	GABAergic synapse
Gnao1	Guanine nucleotide-binding protein G(o) subunit alpha	21602000	1151800	GABAergic synapse
Gnb1	Guanine nucleotide-binding protein G(I)/G(S)/G(T) subunit beta-1	9447400	544480	GABAergic synapse
Gnb2	Guanine nucleotide-binding protein G(I)/G(S)/G(T) subunit beta-2	1199000	159280	GABAergic synapse
Gphn	Gephyrin;Molybdopterin adenylyltransferase;Molybdopterin molybdenumtransferase	1493600	154850	GABAergic synapse
Nsf	Vesicle-fusing ATPase	12858000	1829900	GABAergic synapse
Prkcb	Protein kinase C beta type	1005000	0	GABAergic synapse
Prkcg	Protein kinase C;Protein kinase C gamma type	7313100	243370	GABAergic synapse
Slc6a1	Transporter;Sodium- and chloride-dependent GABA transporter 1	653800	0	GABAergic synapse
Ap2a1	AP-2 complex subunit alpha-1	6293800	72590	Endocytosis
Arpc1a	Actin-related protein 2/3 complex subunit 1A	1633800	0	Endocytosis
Arpc3	Actin-related protein 2/3 complex subunit 3	11045000	397930	Endocytosis
Arpc4	Actin-related protein 2/3 complex subunit 4	18086000	357870	Endocytosis
Arpc5l	Actin-related protein 2/3 complex subunit 5-like protein	4201100	119510	Endocytosis
Capza1	F-actin-capping protein subunit alpha-1	3325100	0	Endocytosis
Capza2	F-actin-capping protein subunit alpha-2	57768000	721560	Endocytosis
Capzb	F-actin-capping protein subunit beta	37617000	1137000	Endocytosis
Dnm1	Dynamin-1	82289000	443410	Endocytosis
Hspa8	Heat shock cognate 71 kDa protein	96418000	10143000	Endocytosis
Iqsec1	IQ motif and SEC7 domain-containing protein 1	5077900	0	Endocytosis
Iqsec2	IQ motif and SEC7 domain-containing protein 2	2667700	0	Endocytosis
Sh3gl1	Endophilin-A2	2520700	100280	Endocytosis
Sh3gl2	Endophilin-A1	1795300000	2199500	Endocytosis
Sh3gl3	Endophilin-A3	6172000	0	Endocytosis
Sh3kbp1	SH3 domain-containing kinase-binding protein 1	2767200	0	Endocytosis
Adcy9	Adenylate cyclase type 9	506610	227890	Calcium signaling pathway
Camk2a	Calcium/calmodulin-dependent protein kinase type II subunit alpha	237830000	5327400	Calcium signaling pathway
Camk2b	Calcium/calmodulin-dependent protein kinase type II subunit beta	61916000	331940	Calcium signaling pathway
Camk2g	Calcium/calmodulin-dependent protein kinase type II subunit gamma	2428400	0	Calcium signaling pathway
Nos1	Nitric oxide synthase;Nitric oxide synthase, brain	44525000	306880	Calcium signaling pathway
Ppp3ca	Serine/threonine-protein phosphatase;Serine/threonine-protein phosphatase 2B catalytic subunit alpha isoform	7812500	775320	Calcium signaling pathway
Ppp3cb	Serine/threonine-protein phosphatase;Serine/threonine-protein phosphatase 2B catalytic subunit beta isoform	794030	61253	Calcium signaling pathway
Prkcb	Protein kinase C beta type	1005000	0	Calcium signaling pathway
Prkcg	Protein kinase C;Protein kinase C gamma type	7313100	243370	Calcium signaling pathway
Vdac1	Voltage-dependent anion-selective channel protein 1	189210	0	Calcium signaling pathway
Vdac2	Voltage-dependent anion-selective channel protein 2	536220	104260	Calcium signaling pathway
Vdac3	Voltage-dependent anion-selective channel protein 3	253730	127210	Calcium signaling pathway
Gnai1	Guanine nucleotide-binding protein G(i) subunit alpha-1	587000	123040	Long-term depression
Gnao1	Guanine nucleotide-binding protein G(o) subunit alpha	21602000	1151800	Long-term depression
Nos1	Nitric oxide synthase;Nitric oxide synthase, brain	44525000	306880	Long-term depression
Ppp2r1a	Serine/threonine-protein phosphatase 2A 65 kDa regulatory subunit A alpha isoform	2331900	121250	Long-term depression
Prkcb	Protein kinase C beta type	1005000	0	Long-term depression
Prkcg	Protein kinase C;Protein kinase C gamma type	7313100	243370	Long-term depression
