# Supplementary figures and images for: Endophilin A1 facilitates organization of the GABAergic postsynaptic machinery to maintain excitation-inhibition balance
Source: eLife journal article supplement (doi:10.7554/elife.102792), 2024-11-12

Figure 3E, Source Data

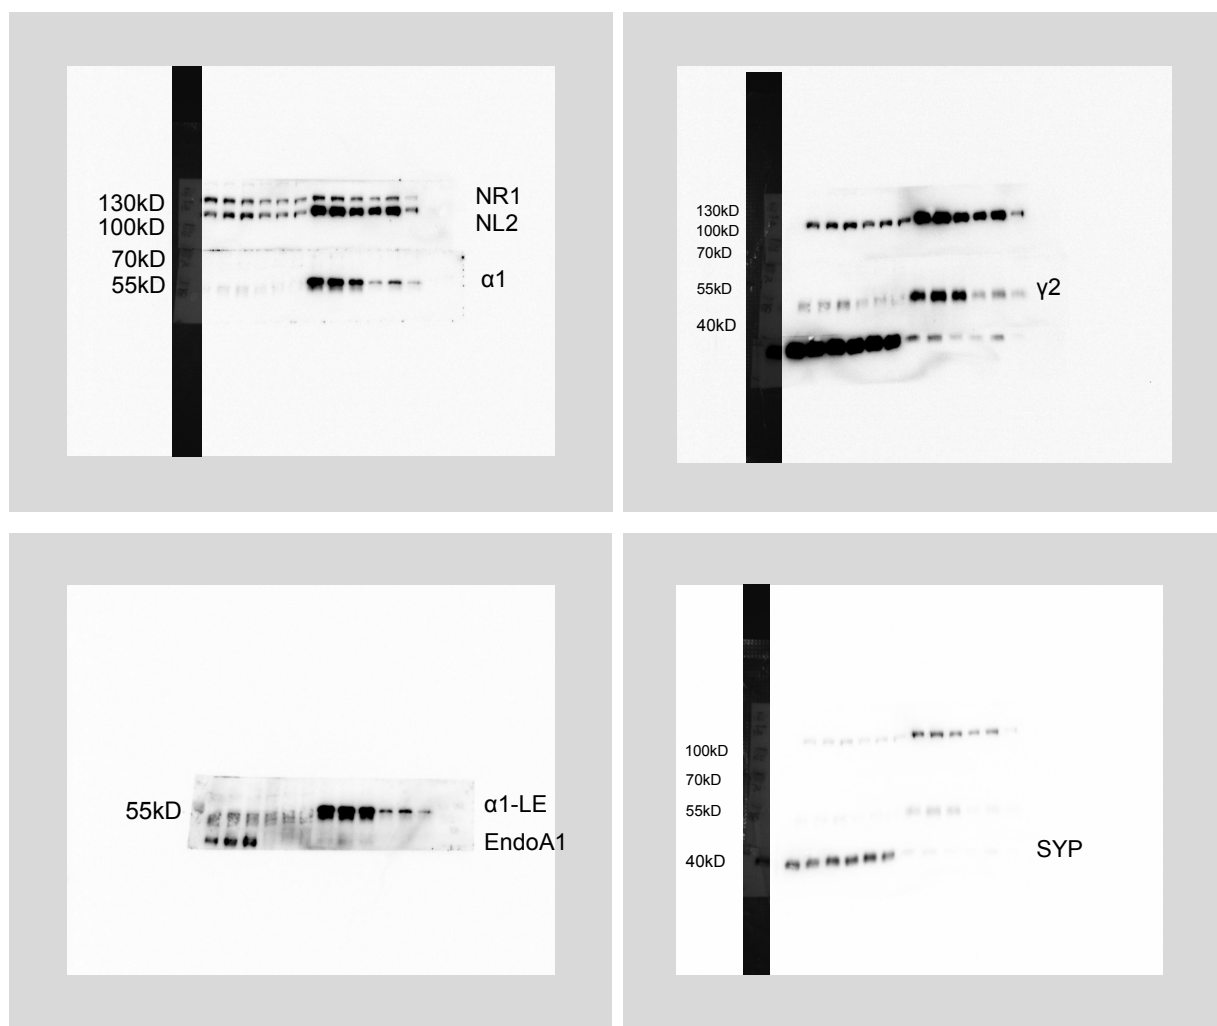

Supplement: fig3-data1 [file elife-102792-fig3-data1-v1.zip]

Figure 3K, Source Data

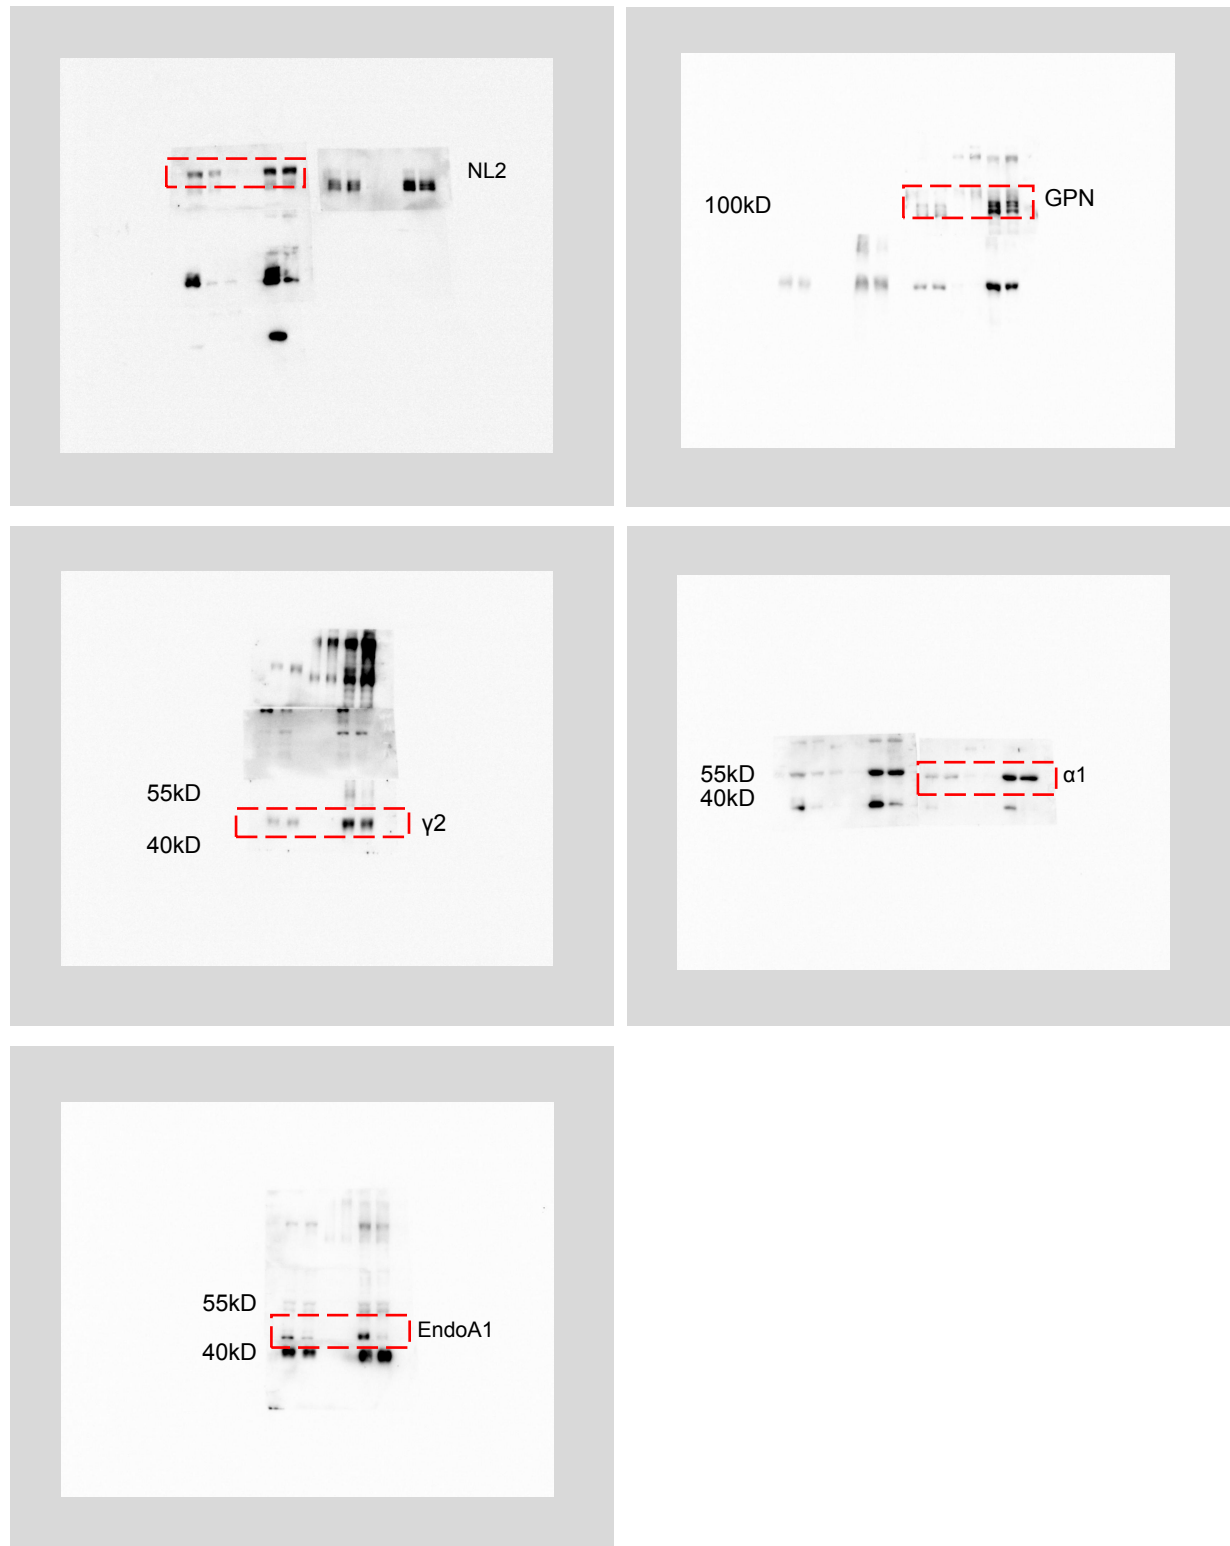

Supplement: fig3-data1 [file elife-102792-fig3-data1-v1.zip]

Figure 3L, Source Data

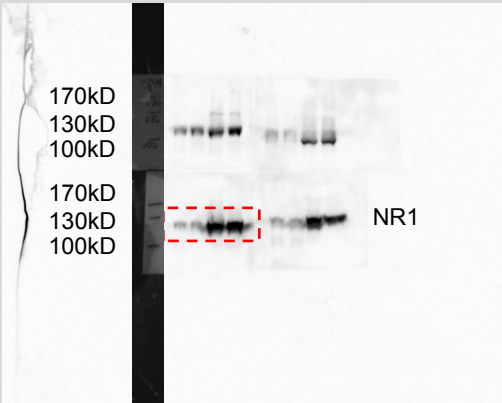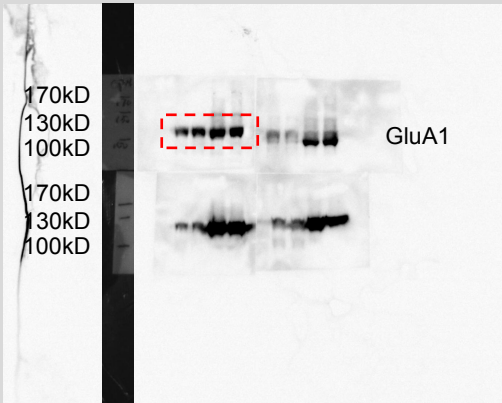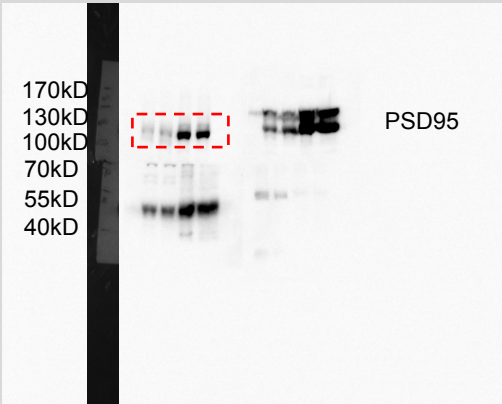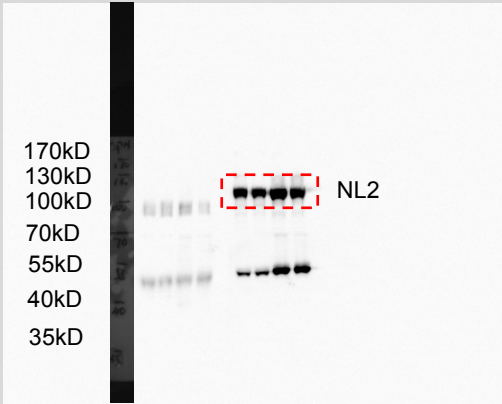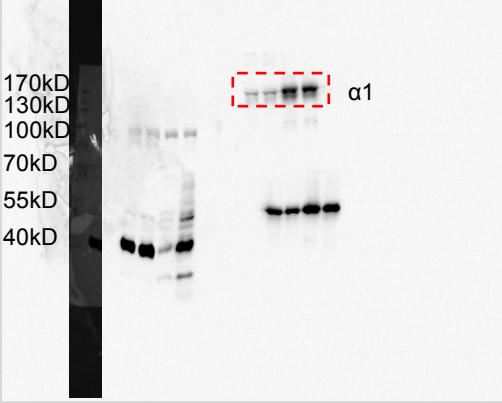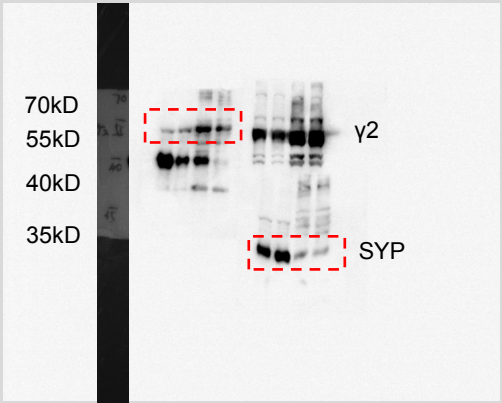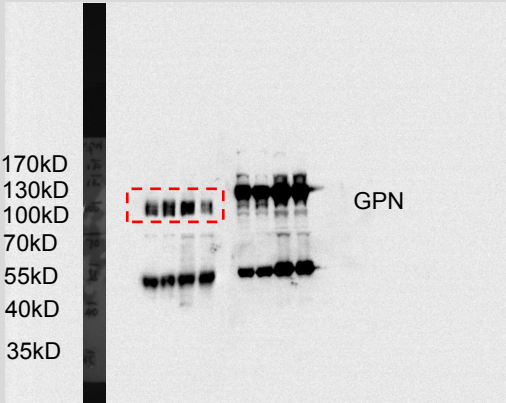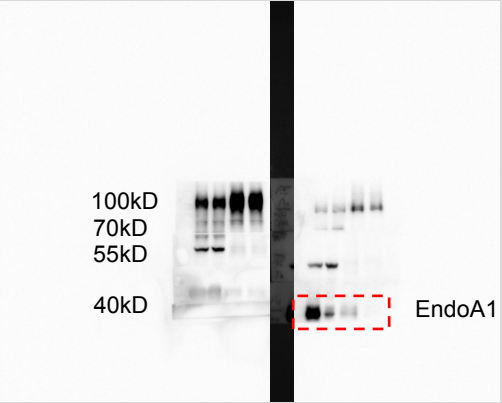

Supplement: fig3-data1 [file elife-102792-fig3-data1-v1.zip]

Figure 3J, Source Data

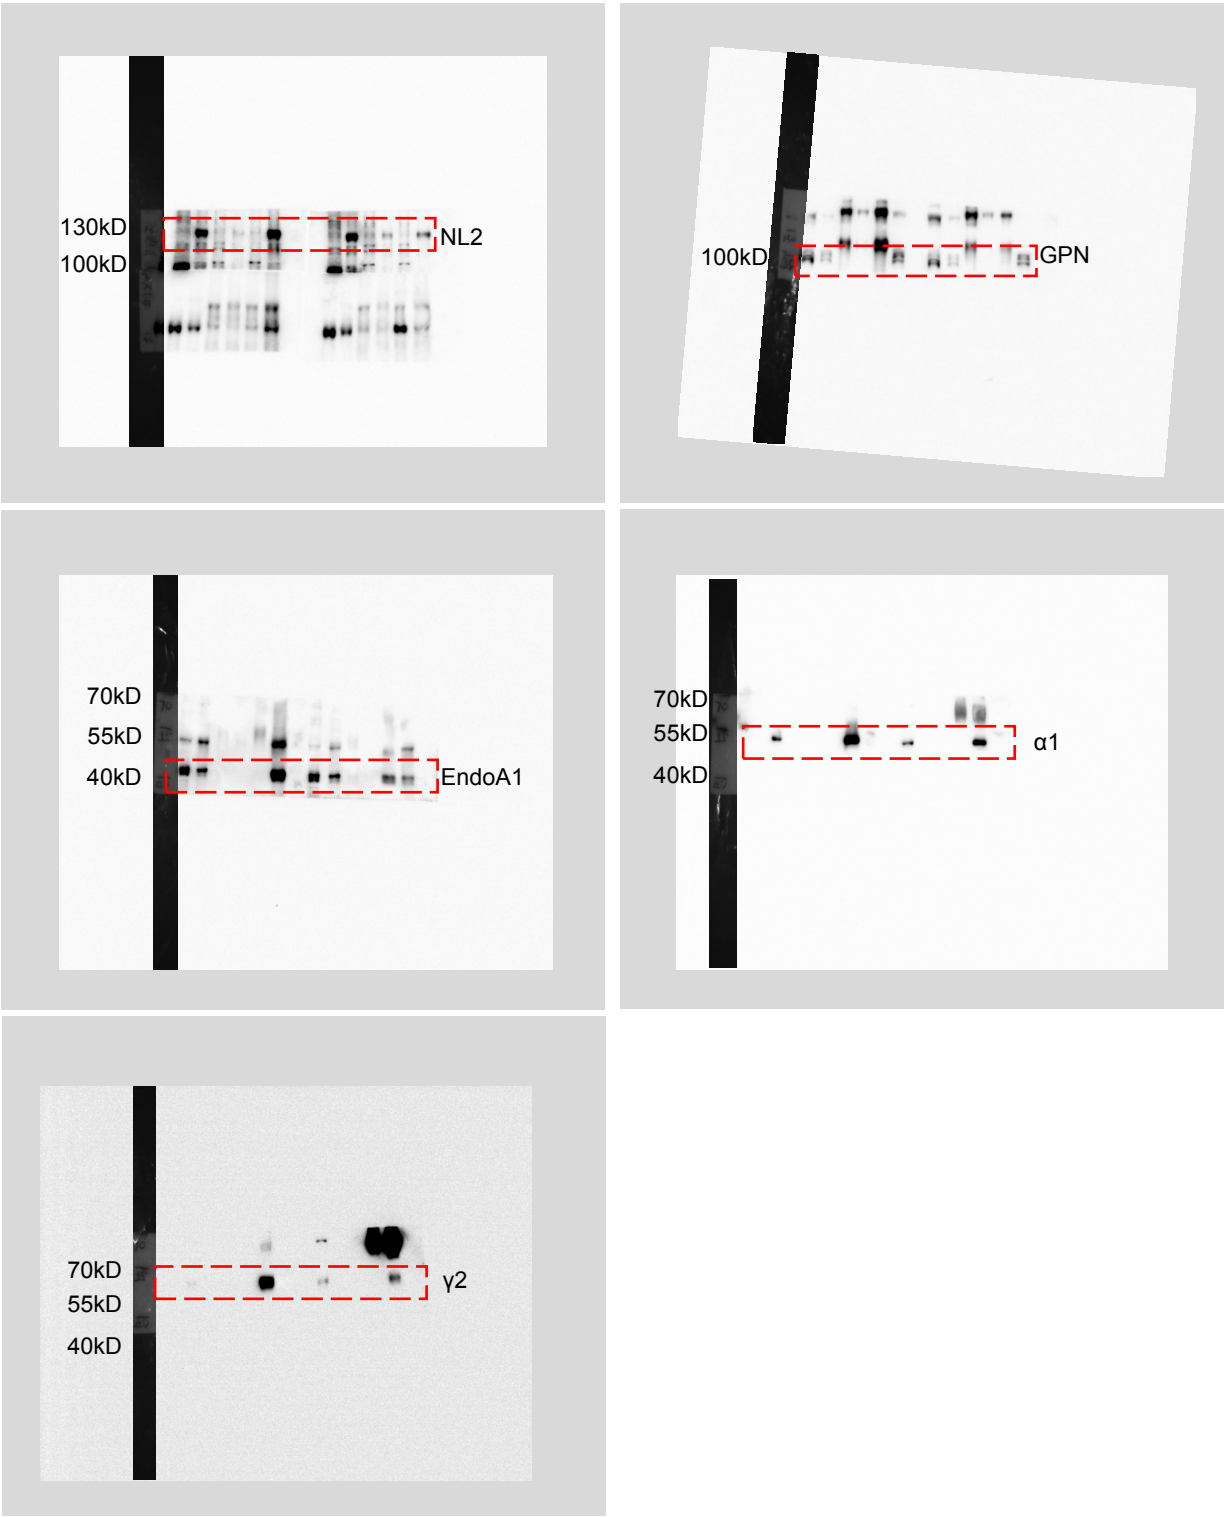

Supplement: fig3-data1 [file elife-102792-fig3-data1-v1.zip]

Figure 4A, Source Data

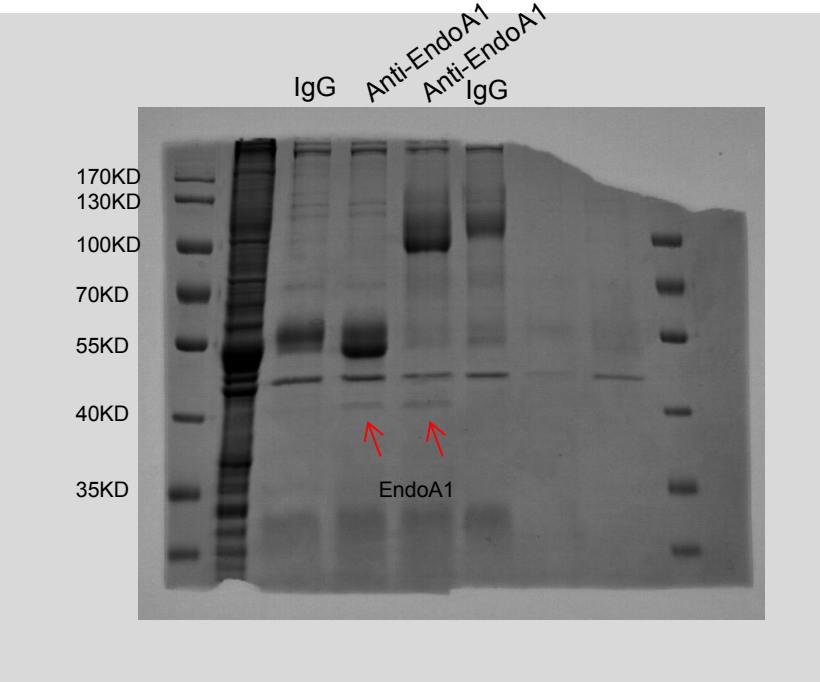

Supplement: fig4-data1 [file elife-102792-fig4-data1-v1.zip]

Figure 4D, Source Data

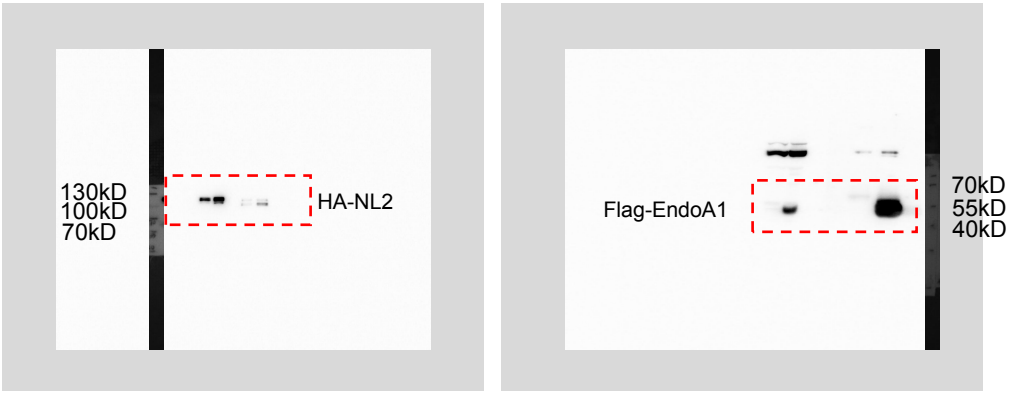

Supplement: fig4-data1 [file elife-102792-fig4-data1-v1.zip]

Figure 4C, Source Data

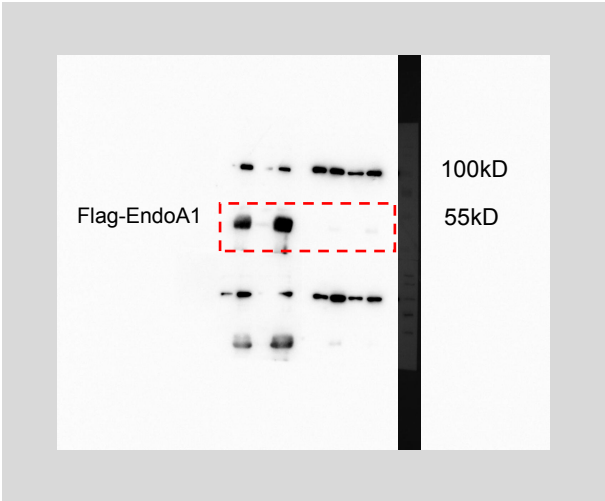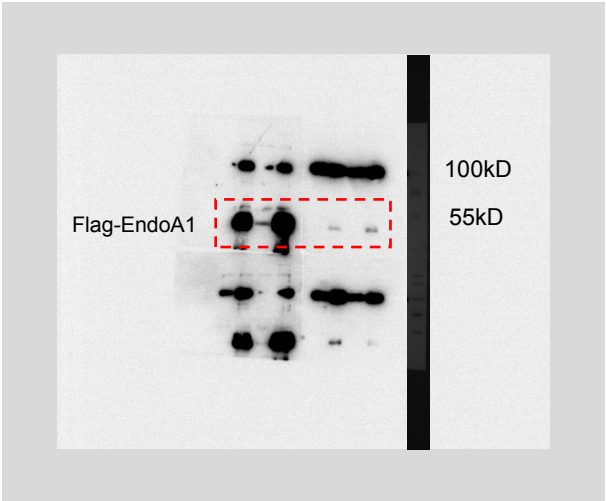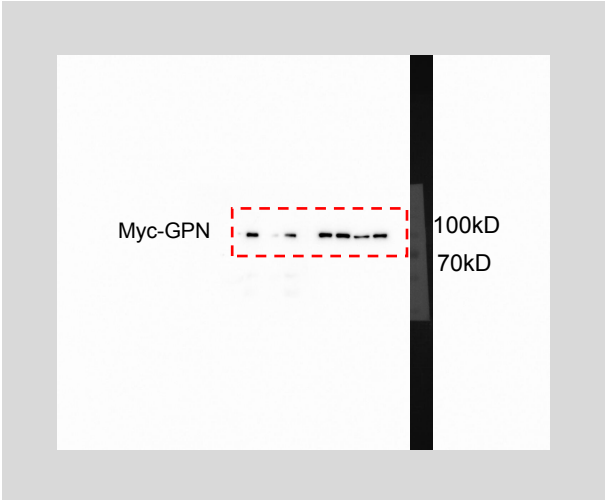

Supplement: fig4-data1 [file elife-102792-fig4-data1-v1.zip]

Figure 4F, Source Data

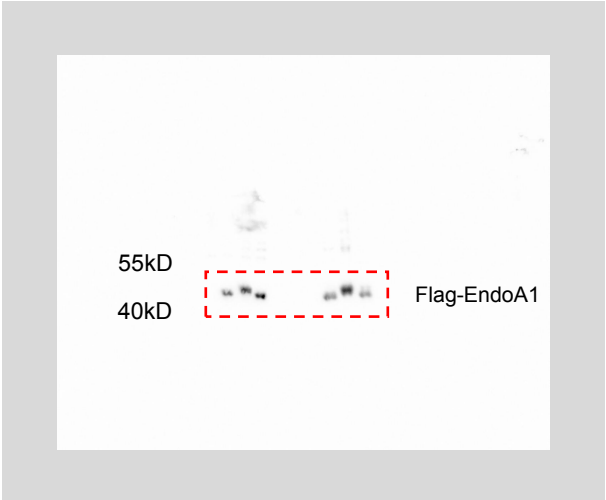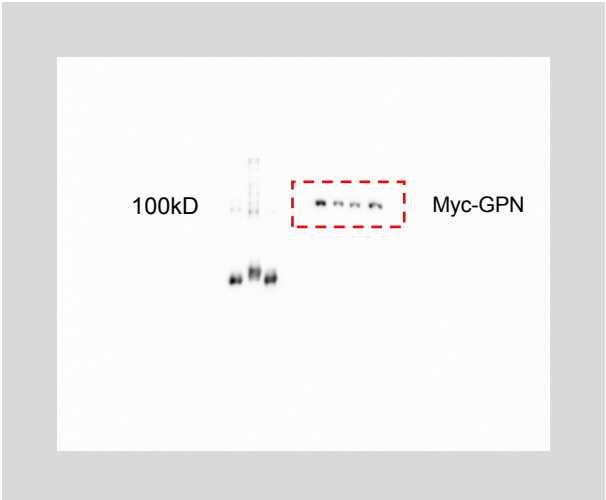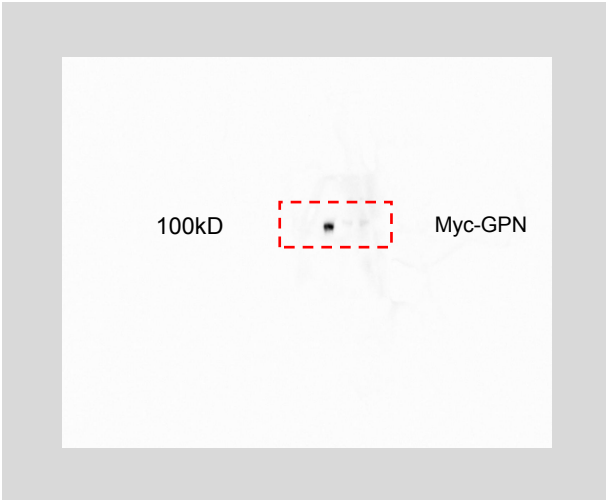

Supplement: fig4-data1 [file elife-102792-fig4-data1-v1.zip]

Figure 4E, Source Data

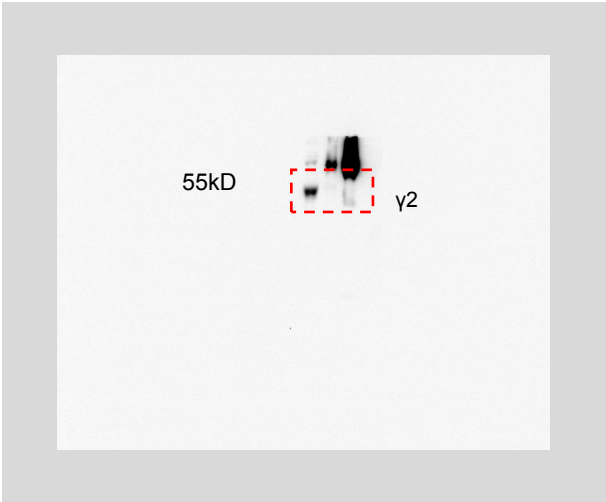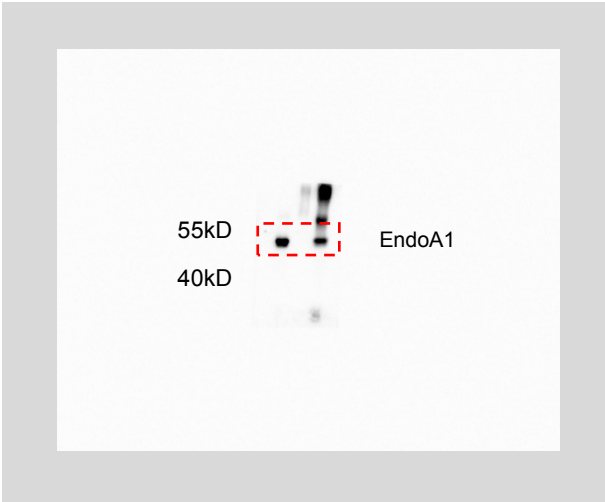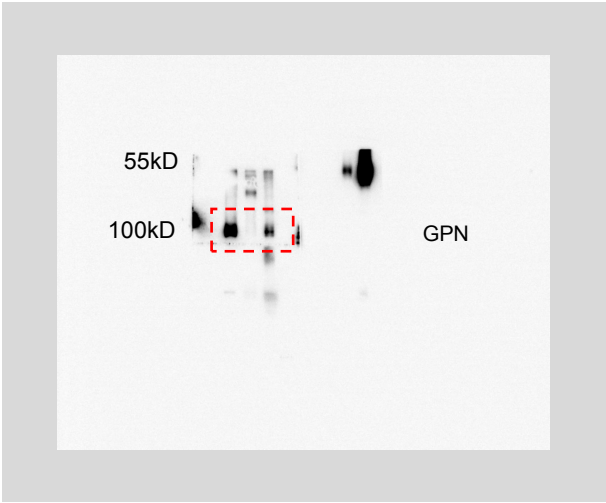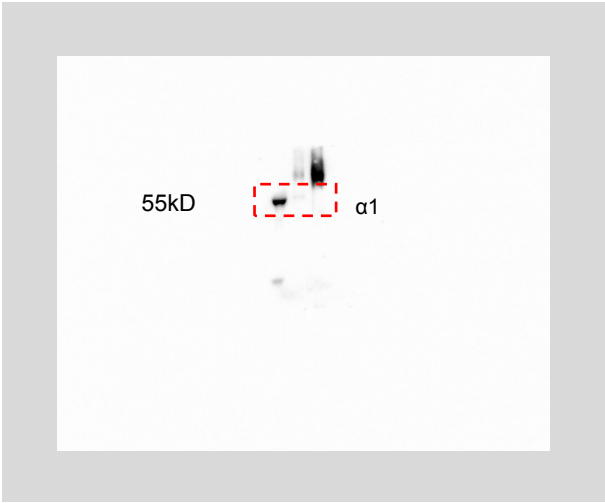

Supplement: fig4-data1 [file elife-102792-fig4-data1-v1.zip]

Figure 5H, Source Data

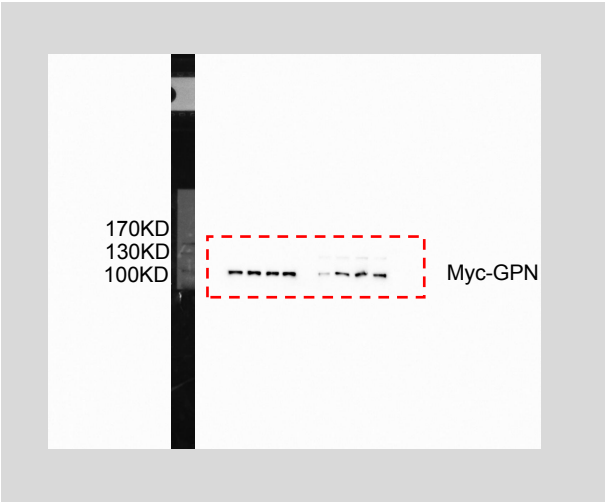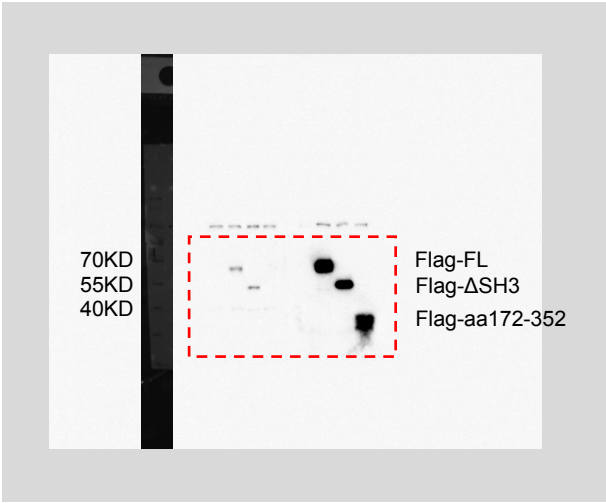

Supplement: fig5-data1 [file elife-102792-fig5-data1-v1.zip]

Figure 5G, Source Data

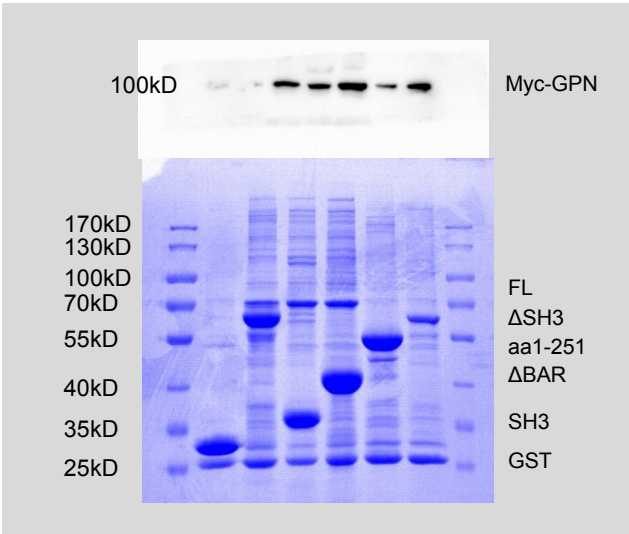

Supplement: fig5-data1 [file elife-102792-fig5-data1-v1.zip]

Figure 5I, Source Data

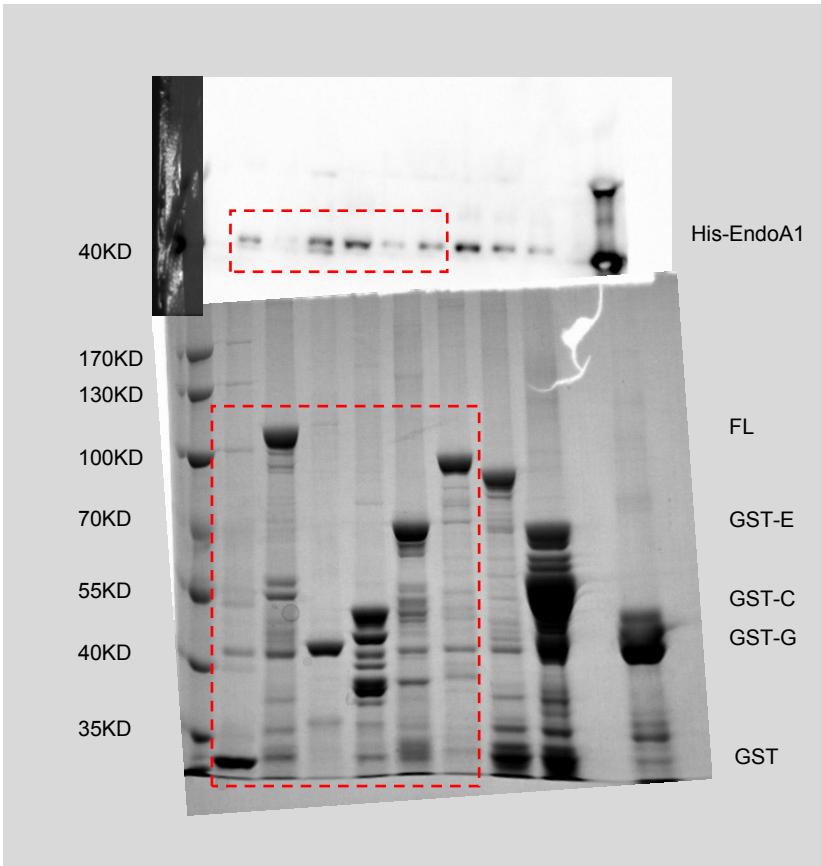

Supplement: fig5-data1 [file elife-102792-fig5-data1-v1.zip]
